# Supplementary material for: Antagonism of PP2A is an independent and conserved function of HIV-1 Vif and causes cell cycle arrest
Source: eLife. 2020 Apr 15;9:e53036. doi: 10.7554/eLife.53036 (PMC7920553; doi:10.7554/eLife.53036)
Supplement: Figure 2—source data 1. — Complete dataset (unfiltered) from TMT-based quantitative proteomic experiment illustrated in Figure 2B. For each protein, normalised, unscaled protein abundances, the number of unique peptides used for protein quantitation, and the protein FDR confidence are shown. [file elife-53036-fig2-data1.xlsx]

## Sheet: Proteomic experiment 1
Accession	Gene ID	Description	Taxonomy	Protein FDR Confidence	# Unique Peptides	Mock_1	Mock_2	Mock_3	Ctrl	Vif WT	I128A	I128D	I31A	RK33/34AA	Y44A
Q96IC2	44M2.3	Putative RNA exonuclease NEF-sp	Homo sapiens	High	7	172.4	185.9	167.9	150.3	113.8	156.5	155.1	175.5	161.7	150.8
P01023	A2M	Alpha-2-macroglobulin	Homo sapiens	High	4	229.3	276.3	224.1	272.9	243.3	362.1	214.6	246.2	282.2	200.9
Q9NRG9	AAAS	Aladin	Homo sapiens	High	15	2744.8	2429.1	1974.1	2525.3	2658.8	2388.9	2270	2722.2	2676.1	2324
Q86V21	AACS	Acetoacetyl-CoA synthetase	Homo sapiens	High	18	1971.3	1718.2	1858.4	1803	1761.7	1707.1	1960.8	1749.4	1883.5	1899.4
Q8N5Z0	AADAT	Kynurenine/alpha-aminoadipate aminotransferase, mitochondrial	Homo sapiens	High	4	343.9	381.1	413.3	351.4	369.4	384.7	402.7	339.8	414.9	422.5
Q6PD74	AAGAB	Alpha- and gamma-adaptin-binding protein p34	Homo sapiens	High	10	1254.9	1046.6	984.5	1043.8	895.3	769.1	717.6	1046.9	1208.5	1153.4
Q2M2I8	AAK1	AP2-associated protein kinase 1	Homo sapiens	High	19	2280.6	2457.7	2340.8	2412.7	2221.8	2490.4	2369.9	2444.8	2225.2	2386.3
A0A096LP25	AAK1	AP2-associated protein kinase 1 (Fragment)	Homo sapiens	Medium	3	595.4	600.1	710.1	607.2	549.6	658.2	607.3	534.9	592.2	643.5
Q9H7C9	AAMDC	Mth938 domain-containing protein	Homo sapiens	High	8	818.5	1016.4	950	936	829.1	1105.6	866.4	1014.1	803.6	942.9
Q13685	AAMP	Angio-associated migratory cell protein	Homo sapiens	High	15	2284.2	2736.6	2446.9	2857	2487.2	2953.2	2473.6	2894.8	2258.5	2441.9
Q9Y312	AAR2	Protein AAR2 homolog	Homo sapiens	High	16	3221.7	3087.8	2872.2	3058.3	3878.6	3144.1	3125.7	3297.7	3275.7	3223.2
P49588	AARS	Alanine--tRNA ligase, cytoplasmic	Homo sapiens	High	53	13534.6	14069.5	14586	13581	13144.6	13128	14211.6	13627.6	13118.1	14581.2
Q5JTZ9	AARS2	Alanine--tRNA ligase, mitochondrial	Homo sapiens	High	34	2535.6	2631.9	2731.2	2605.2	2715.3	2625.7	2515.8	2583.9	2529	2698
Q9BTE6	AARSD1	Alanyl-tRNA editing protein Aarsd1	Homo sapiens	High	18	2050.7	1857.4	1826.8	1876.4	2158.1	1861.9	1824.6	1828.2	1933.1	1787.3
Q9NRN7	AASDHPPT	L-aminoadipate-semialdehyde dehydrogenase-phosphopantetheinyl transferase	Homo sapiens	High	14	4551.2	4146.7	4076.7	4054.9	4676	4112.1	4221.3	4420.8	4450	4291.5
Q9UDR5	AASS	Alpha-aminoadipic semialdehyde synthase, mitochondrial	Homo sapiens	High	24	2664.3	2559.4	2713	2658	2515.4	2611.5	2727.1	2531.6	2642.7	2804.3
Q9NY61	AATF	Protein AATF	Homo sapiens	High	19	2659.9	2936	2873.5	2837.1	2424.7	2923	2874.2	2900.4	2685.4	2819.5
P80404	ABAT	4-aminobutyrate aminotransferase, mitochondrial	Homo sapiens	High	12	674	819	783.5	791.3	762.3	806.7	727.2	804.7	669	698.9
O95477	ABCA1	ATP-binding cassette sub-family A member 1	Homo sapiens	High	1	8.9	20.7	28.1	17.2	15.9	19.8	27.6	13.8	12.7	30.6
Q9NRK6	ABCB10	ATP-binding cassette sub-family B member 10, mitochondrial	Homo sapiens	High	20	2728.8	2873.3	3098.1	2762.9	2699.3	2844.4	2802.6	2573.1	2715.4	2861.4
P21439	ABCB4	Phosphatidylcholine translocator ABCB4	Homo sapiens	High	2	79.3	116.5	103	89.1	83.9	99.7	90.6	89.8	81.6	86.5
Q9NP58	ABCB6	ATP-binding cassette sub-family B member 6, mitochondrial	Homo sapiens	Medium	1	233.7	253.1	231.2	224.1	253.3	233.2	207	263.9	245.7	247.6
O75027	ABCB7	ATP-binding cassette sub-family B member 7, mitochondrial	Homo sapiens	High	20	2525	2427.4	2023.3	2518.1	2593.2	2614.5	2158.9	2544	2504.3	2279.8
Q9NUT2	ABCB8	ATP-binding cassette sub-family B member 8, mitochondrial	Homo sapiens	High	7	379.7	384.6	374.9	380.8	405.2	385.7	323.5	400	416.5	345.1
P33527	ABCC1	Multidrug resistance-associated protein 1	Homo sapiens	High	36	4485.4	4564.7	4894	4740.2	4167.5	4784.3	4550.8	4515.4	4441.9	4654.5
O15439	ABCC4	Multidrug resistance-associated protein 4	Homo sapiens	High	20	1837.9	1853.7	1793.8	1782.1	1949.3	1898.9	1788.7	1814.8	1880	1857.8
O15440	ABCC5	Multidrug resistance-associated protein 5	Homo sapiens	High	8	780.7	753.1	853.5	790	967.3	793.2	828.5	775.8	830.9	932.1
P28288	ABCD3	ATP-binding cassette sub-family D member 3	Homo sapiens	High	29	4245.4	4017.5	4255.1	4028.5	4685.6	4273.1	4252.6	4155.7	4611.1	4445.8
O14678	ABCD4	ATP-binding cassette sub-family D member 4	Homo sapiens	High	5	201.6	213.9	250.9	229.5	222.1	218.5	248.4	216.5	223.4	221.8
P61221	ABCE1	ATP-binding cassette sub-family E member 1	Homo sapiens	High	31	5299.8	4523.7	4236.5	4650.8	5208.1	4286.7	4577.3	4791.6	4915.2	4443.2
Q8NE71	ABCF1	ATP-binding cassette sub-family F member 1	Homo sapiens	High	33	5432	5919.6	5504	5336.4	5427.9	5740.6	5072.8	5538.2	5563.7	5010.9
Q9UG63	ABCF2	ATP-binding cassette sub-family F member 2	Homo sapiens	High	35	7842.1	8386.9	8068	8338.9	9232	8459.1	8127.6	8210	8164.7	8545.9
Q9NUQ8	ABCF3	ATP-binding cassette sub-family F member 3	Homo sapiens	High	28	3986.1	3991.2	4340.3	3917.3	4410	3902.7	4191.9	4019.7	4195.2	4241.6
Q9NUJ1	ABHD10	Mycophenolic acid acyl-glucuronide esterase, mitochondrial	Homo sapiens	High	16	2273.8	2111.6	2125.4	2118.4	2289.2	2192.4	2270.1	2217.9	2201.7	2132.5
Q8NFV4	ABHD11	Protein ABHD11	Homo sapiens	High	7	566.4	656.6	662.9	649.8	592.9	664.5	645.7	619.2	593.2	608.4
Q8N2K0	ABHD12	Monoacylglycerol lipase ABHD12	Homo sapiens	High	12	876.2	879.2	865.4	830.5	869	897.7	854	899.1	904	889
Q7L211	ABHD13	Protein ABHD13	Homo sapiens	High	3	78.3	72.1	87.2	69.4	81.7	72.2	90.9	79.6	80.1	94.5
Q96IU4	ABHD14B	Protein ABHD14B	Homo sapiens	High	8	1390.4	1388.4	1431.3	1341.3	1252.2	1308.5	1449.5	1475.9	1345.8	1376.9
Q6UXT9	ABHD15	Protein ABHD15	Homo sapiens	High	4	179	177.2	219.8	183.3	171.7	201.5	208.5	192.2	196.6	200.5
O95870	ABHD16A	Protein ABHD16A	Homo sapiens	High	18	1222.3	1142.2	1105.9	1191.7	1226.3	1225.8	1143.2	1174.8	1234.4	1198.3
Q96GS6	ABHD17A	Protein ABHD17A	Homo sapiens	High	6	112.8	141.1	158.6	133.5	116.1	132.4	153.2	114.5	129	136.8
Q5VST6	ABHD17B	Protein ABHD17B	Homo sapiens	High	8	1031.6	1273.2	1094.2	1222.9	935.2	1268.5	1101.3	1312.7	994.7	961
Q0P651	ABHD18	Protein ABHD18	Homo sapiens	High	3	283.9	295.8	276.3	288.7	278.9	277.9	278.4	282.1	277.1	292.3
Q8WU67	ABHD3	Phospholipase ABHD3	Homo sapiens	High	2	57.1	59.9	67.6	67.1	77.8	78.5	67.8	60.3	66.6	77.9
Q9BV23	ABHD6	Monoacylglycerol lipase ABHD6	Homo sapiens	High	5	331.8	359.6	359	326.1	423.1	348.1	350.6	343.8	381.2	398.4
Q8IZP0	ABI1	Abl interactor 1	Homo sapiens	High	11	2182.4	1968.5	2507.1	1995.5	2173.1	2032.8	2566.8	1978.3	2303.3	2542.4
Q9NYB9	ABI2	Abl interactor 2	Homo sapiens	High	4	309.9	331.4	331.7	320.8	292.4	307.1	368.5	316.9	317	332.4
Q9P2A4	ABI3	ABI gene family member 3	Homo sapiens	High	6	405.9	378.4	352	379.5	377.1	392.1	323.6	400.4	381.6	368.9
P00519	ABL1	Tyrosine-protein kinase ABL1	Homo sapiens	High	17	1640.4	1647	1423.6	1692	1488.1	1757.8	1439.1	1642.7	1656.7	1498.8
P42684	ABL2	Abelson tyrosine-protein kinase 2	Homo sapiens	High	14	1137.1	1139.7	1066.1	1162.8	1188.7	1225.4	1078.4	1193.3	1166.6	1173.7
O14639	ABLIM1	Actin-binding LIM protein 1	Homo sapiens	High	25	2675.8	2612.7	2349.9	2604.8	2438.6	2597.5	2393.6	2604.8	2492.4	2514.2
Q12979	ABR	Active breakpoint cluster region-related protein	Homo sapiens	High	23	1756.5	1781.5	1883.3	1760.3	1657.9	1684.9	1930.2	1714.9	1732	1792.1
Q9P1F3	ABRACL	Costars family protein ABRACL	Homo sapiens	High	4	809	726.4	713.3	766.7	767.2	796.6	629.7	778	743.4	685.9
Q9ULW3	ABT1	Activator of basal transcription 1	Homo sapiens	High	15	1181.1	1265.2	1425.3	1199.6	1006.1	1372.1	1272.6	1205.9	1229.2	1261.9
P09110	ACAA1	3-ketoacyl-CoA thiolase, peroxisomal	Homo sapiens	High	16	1618.4	1720.9	1582.3	1828.3	1702.7	1869.1	1668.5	1752.1	1569.7	1626.8
P42765	ACAA2	3-ketoacyl-CoA thiolase, mitochondrial	Homo sapiens	High	18	2551.7	2611.2	2429.7	2523	2469.3	2521.2	2498.5	2626.8	2432.5	2391.6
Q13085	ACACA	Acetyl-CoA carboxylase 1	Homo sapiens	High	96	14884.6	14951.7	15958.1	15378.7	14689.5	15408.6	15246.3	14423.7	14735.4	15071.2
O00763	ACACB	Acetyl-CoA carboxylase 2	Homo sapiens	High	1	88.1	95.1	65.6	96.7	76.7	122.8	74.4	78.1	83.5	81.7
Q6JQN1	ACAD10	Acyl-CoA dehydrogenase family member 10	Homo sapiens	High	13	558.7	556.7	553.2	542.5	514.2	524.5	566.1	567.7	555	527.5
Q9UKU7	ACAD8	Isobutyryl-CoA dehydrogenase, mitochondrial	Homo sapiens	High	18	1279.6	1216.4	1318.3	1261	1345.8	1273.5	1295.4	1295.8	1262.1	1301.5
Q9H845	ACAD9	Acyl-CoA dehydrogenase family member 9, mitochondrial	Homo sapiens	High	29	3410.1	3471.4	3952	3598	3632.4	3666.2	3821.4	3423.2	3647	3852.6
P11310	ACADM	Medium-chain specific acyl-CoA dehydrogenase, mitochondrial	Homo sapiens	High	22	6658.2	6462	6573.2	6366.6	6677.9	6067.5	6622	6517.8	6366.3	6362
P16219	ACADS	Short-chain specific acyl-CoA dehydrogenase, mitochondrial	Homo sapiens	High	6	550.1	546.8	517.2	533.1	481.2	563.3	507	545.4	545.7	495.8
P45954	ACADSB	Short/branched chain specific acyl-CoA dehydrogenase, mitochondrial	Homo sapiens	High	9	686.2	673.4	677.6	673.7	725.6	673.8	750.5	700.8	659	686.2
P49748	ACADVL	Very long-chain specific acyl-CoA dehydrogenase, mitochondrial	Homo sapiens	High	34	5696.6	5915	5475.7	5872.8	5568.3	5741.2	5451.5	5954.7	5301.3	5456.7
Q15027	ACAP1	Arf-GAP with coiled-coil, ANK repeat and PH domain-containing protein 1	Homo sapiens	High	34	4493.8	4847.7	4569.5	4908.5	3980.7	4972	4365.9	4733.5	4436.6	4193.9
Q15057	ACAP2	Arf-GAP with coiled-coil, ANK repeat and PH domain-containing protein 2	Homo sapiens	High	33	3778.9	3921.2	4186.2	3979.5	3681.6	4071.9	4030.5	3775.7	3648.5	3922.2
Q96P50	ACAP3	Arf-GAP with coiled-coil, ANK repeat and PH domain-containing protein 3	Homo sapiens	High	4	79.2	97.8	69.8	91.9	66.8	92.4	74.5	94.5	74.8	67.4
P24752	ACAT1	Acetyl-CoA acetyltransferase, mitochondrial	Homo sapiens	High	27	6879.5	6463.6	6132.4	6356.6	6707.7	6409.3	6096.3	6245.1	6379.5	6262.3
Q9BWD1	ACAT2	Acetyl-CoA acetyltransferase, cytosolic	Homo sapiens	High	25	4594.7	5043.7	4385.1	5168.8	5330.3	5151.1	5009.2	5954.7	5047.1	5003.2
Q9H3P7	ACBD3	Golgi resident protein GCP60	Homo sapiens	High	20	2129.2	2098.4	2189	2091	2145.4	2316.4	2022.8	1983.3	2060.8	2078
Q5T8D3	ACBD5	Acyl-CoA-binding domain-containing protein 5	Homo sapiens	High	14	811.3	858.8	796.4	885.1	730.8	966.8	769.7	868.4	769.8	778.4
Q9BR61	ACBD6	Acyl-CoA-binding domain-containing protein 6	Homo sapiens	High	11	1088.9	968.6	1071.4	986	1196.8	1035.3	1034.1	944.8	1066.7	1192.2
Q8N6N7	ACBD7	Acyl-CoA-binding domain-containing protein 7	Homo sapiens	High	5	704.7	853.3	637	801.9	742.4	824.7	728.9	872.5	751.5	694.1
Q96AP0	ACD	Adrenocortical dysplasia protein homolog	Homo sapiens	High	8	522.1	494.1	510.7	503.3	582.6	508.8	571.4	549.6	496.5	564.2
Q9UKV3	ACIN1	Apoptotic chromatin condensation inducer in the nucleus	Homo sapiens	High	50	8614	8365.8	8266.2	8295.4	7880.5	8327.4	8040.8	8357.2	8101.3	7891.7
P53396	ACLY	ATP-citrate synthase	Homo sapiens	High	67	17179.8	16635.7	17828.2	17452.2	17371	16952.9	17602.4	17050.7	17390.3	17772.8
P21399	ACO1	Cytoplasmic aconitate hydratase	Homo sapiens	High	40	6990.8	6388.8	5606.3	6573.1	6514.8	6669.9	6051	6790.4	6711.1	6236.7
Q99798	ACO2	Aconitate hydratase, mitochondrial	Homo sapiens	High	43	8381.8	7742.7	7657.8	7730.9	8326.6	7566.6	7660.5	8022.3	7733.7	7621.2
Q86TX2	ACOT1	Acyl-coenzyme A thioesterase 1	Homo sapiens	High	2	392.9	384.3	356.4	383.9	387.5	375.3	378.5	432	354	389.1
Q9NPJ3	ACOT13	Acyl-coenzyme A thioesterase 13	Homo sapiens	High	5	1437.7	1197.7	1274.5	1226.6	1524.5	1199.3	1500.9	1231.6	1391.6	1319.5
P49753	ACOT2	Acyl-coenzyme A thioesterase 2, mitochondrial	Homo sapiens	High	3	4305.6	3888.4	4029.3	3948.1	4337.1	4042.2	4123	3991.8	4250.6	4132.4
O00154	ACOT7	Cytosolic acyl coenzyme A thioester hydrolase	Homo sapiens	High	20	5009.8	4678.2	5685	4711.4	5138.4	4695.7	5436.3	4545.8	5086	5564
O14734	ACOT8	Acyl-coenzyme A thioesterase 8	Homo sapiens	High	8	991.6	783.3	766.4	827.6	974	793.2	911.7	912.2	960.6	890.5
Q15067	ACOX1	Peroxisomal acyl-coenzyme A oxidase 1	Homo sapiens	High	27	3295.8	3284.1	3347.1	3314.4	3312.2	3477.2	3561.2	3369.8	3244.5	3344.5
O15254	ACOX3	Peroxisomal acyl-coenzyme A oxidase 3	Homo sapiens	High	12	809.6	804.5	774.6	806	808.8	822.1	834.5	766.9	813.5	777.5
P24666-2	ACP1	Isoform 2 of Low molecular weight phosphotyrosine protein phosphatase	Homo sapiens	Medium	2	19.1	17.7	31.2	21.8	17.1	18.4	22.1	18.2	16.2	29.3
P24666	ACP1	Low molecular weight phosphotyrosine protein phosphatase	Homo sapiens	High	12	1882.6	1378.8	1424.5	1453	1907.5	1388.3	1535.8	1564	1835.2	1714
P11117	ACP2	Lysosomal acid phosphatase	Homo sapiens	High	6	498.8	491.9	411	522.5	479.7	544.2	465.3	501.6	452.1	442.3
Q9NPH0	ACP6	Lysophosphatidic acid phosphatase type 6	Homo sapiens	High	4	180.9	209.3	190.5	178.8	170.4	190.5	178.8	194.7	178.1	171.4
Q96CM8	ACSF2	Acyl-CoA synthetase family member 2, mitochondrial	Homo sapiens	High	18	1552.1	1458	1684.1	1457.1	1414.5	1380.2	1462.2	1373.1	1470.7	1447.8
Q4G176	ACSF3	Acyl-CoA synthetase family member 3, mitochondrial	Homo sapiens	High	22	2627.9	2570.2	2663.5	2484.5	2282.5	2519.6	2634.2	2476.2	2608	2564.4
O95573	ACSL3	Long-chain-fatty-acid--CoA ligase 3	Homo sapiens	High	29	3439.2	3461.6	3330.7	3579.7	3687.8	3517.4	3467	3720.3	3472.9	3549.1
O60488	ACSL4	Long-chain-fatty-acid--CoA ligase 4	Homo sapiens	High	33	8274.4	8534.7	7255	8791.3	7983.7	8688.7	8107	9020.7	8083.5	7467.1
Q9ULC5	ACSL5	Long-chain-fatty-acid--CoA ligase 5	Homo sapiens	High	20	1343.4	1254.7	1272.4	1290.2	1375	1297.1	1291.8	1279.1	1418.9	1466.2
Q9UKU0	ACSL6	Long-chain-fatty-acid--CoA ligase 6	Homo sapiens	Medium	2	150.3	160.5	212.8	146.7	143.1	165.7	178.8	157.8	155.7	189.8
Q53FZ2	ACSM3	Acyl-coenzyme A synthetase ACSM3, mitochondrial	Homo sapiens	High	12	831.3	790.7	830.9	827.8	855.4	851.9	890.3	815.4	865.2	868.6
P0C7M7	ACSM4	Acyl-coenzyme A synthetase ACSM4, mitochondrial	Homo sapiens	High	1	310.1	336	420.3	339.6	346.8	349.3	370	320.7	311.9	376.5
Q9NUB1	ACSS1	Acetyl-coenzyme A synthetase 2-like, mitochondrial	Homo sapiens	High	21	2110.5	2126.5	2443.6	2070.4	1936.2	2103.8	2260.1	1910.7	2126.4	2220.7
Q9NR19	ACSS2	Acetyl-coenzyme A synthetase, cytoplasmic	Homo sapiens	High	2	127.8	144.4	136	131.1	117.5	114.3	117.4	134.1	136.8	133.8
P60709	ACTB	Actin, cytoplasmic 1	Homo sapiens	High	1	47183.5	48556.3	50620.4	51130.3	48380.7	40582.5	48658.2	45925.6	55794	51574.1
Q562R1	ACTBL2	Beta-actin-like protein 2	Homo sapiens	High	6	445.1	426.2	611.4	540.6	450.6	504.8	509.3	427.4	516.1	455.7
P68032	ACTC1	Actin, alpha cardiac muscle 1	Homo sapiens	High	4	2589.7	3001.4	2708.9	3263.1	2935.2	2012.6	3053.1	2544.2	3594.9	3204.2
P63261	ACTG1	Actin, cytoplasmic 2	Homo sapiens	High	1	304.1	299.6	518.6	312.2	311.8	249.4	380.2	299.7	364	448.3
O96019	ACTL6A	Actin-like protein 6A	Homo sapiens	High	20	5009.1	4800.3	5616	4675.9	4829.1	4557.8	5319	4681.8	4872.6	5387.9
P12814	ACTN1	Alpha-actinin-1	Homo sapiens	High	38	9462.1	8735.5	9465.2	9079.2	8780.6	8783.1	9126.9	8773.6	9467.9	9589.7
O43707	ACTN4	Alpha-actinin-4	Homo sapiens	High	47	16634	16467.5	18069.9	16062.3	15667.2	15332.8	17381.7	15927.3	16231.8	17252.9
Q9NZ32	ACTR10	Actin-related protein 10	Homo sapiens	High	13	1043.5	1033.7	1158.5	1051.7	1064.4	1077.2	1074.3	990.3	1106.4	1042.9
P61163	ACTR1A	Alpha-centractin	Homo sapiens	High	7	4733.7	4507.1	4706.6	4190.9	4686.4	3967.5	4969.2	4670.4	4643.6	4820.4
P42025	ACTR1B	Beta-centractin	Homo sapiens	High	6	564.1	544.4	702.8	502.1	547.5	492.4	600.4	461.5	589.3	646.6
P61160	ACTR2	Actin-related protein 2	Homo sapiens	High	17	4938.5	5160.6	4829.8	5182.7	4951.3	5296.6	4958.2	5357.3	4708	4752.7
P61158	ACTR3	Actin-related protein 3	Homo sapiens	High	20	5036.2	5558.8	5011.3	5463.3	5174.7	5522.9	4882.8	5757.3	4906.3	4749.9
Q9P1U1	ACTR3B	Actin-related protein 3B	Homo sapiens	High	2	47.6	34.6	32.2	37.7	46.7	41.7	39.5	36	50.9	40.8
Q9H9F9	ACTR5	Actin-related protein 5	Homo sapiens	High	17	1210.9	1239.7	1275.9	1258.7	1388.4	1348.5	1313.1	1220.7	1193.5	1258.8
Q9GZN1	ACTR6	Actin-related protein 6	Homo sapiens	High	12	1655.4	1576.9	1478.2	1642.5	1633.8	1755.4	1453.6	1651.1	1657.6	1574.3
Q9H981	ACTR8	Actin-related protein 8	Homo sapiens	High	15	971.6	1001.1	1149.7	1037.7	1030	1111.1	1066.1	1039.2	1033.6	1121.7
Q13705	ACVR2B	Activin receptor type-2B	Homo sapiens	High	6	472.7	499.8	519.4	489.7	454.1	522	533.4	476.4	498.2	466.2
Q03154	ACY1	Aminoacylase-1	Homo sapiens	High	18	1725.8	1827.9	1901.7	1843.6	1685.6	1865.2	1728.4	1748.9	1709.6	1923.9
Q96HD9	ACY3	N-acyl-aromatic-L-amino acid amidohydrolase (carboxylate-forming)	Homo sapiens	High	3	151.5	141	165	156.6	167.5	165	150.6	136.4	169.5	173
P07311	ACYP1	Acylphosphatase-1	Homo sapiens	High	7	598.8	644.1	591.5	614.5	551.5	648.1	595.9	670.3	572.1	555.5
P14621	ACYP2	Acylphosphatase-2	Homo sapiens	Medium	1	42.2	36.3	52.2	34.2	33.8	41.1	38.4	29.2	39.6	41.7
P00813	ADA	Adenosine deaminase	Homo sapiens	High	25	8386.3	8203	8262.5	7994.1	7711.2	7882.4	7937.4	8004.4	8020.1	8235
Q6DHV7	ADAL	Adenosine deaminase-like protein	Homo sapiens	High	5	329.2	275.6	214.9	304.4	291	297.5	250.7	329.4	322	240.6
O14672	ADAM10	Disintegrin and metalloproteinase domain-containing protein 10	Homo sapiens	High	18	1400.2	1537.7	1594.9	1578.5	1362	1832.1	1612.4	1564.3	1397.6	1507.5
Q13444	ADAM15	Disintegrin and metalloproteinase domain-containing protein 15	Homo sapiens	High	4	236.4	308.3	252.7	320.3	238	315.5	270.9	297.6	267	249.7
P78536	ADAM17	Disintegrin and metalloproteinase domain-containing protein 17	Homo sapiens	High	18	1178.8	1315.1	1356.6	1306.6	1237.8	1340.8	1250.5	1385.1	1223.4	1353.3
Q9P0K1	ADAM22	Disintegrin and metalloproteinase domain-containing protein 22	Homo sapiens	High	8	487.8	516.9	471.6	522	473.2	541.5	480	501.5	488.8	490.6
Q13443	ADAM9	Disintegrin and metalloproteinase domain-containing protein 9	Homo sapiens	High	6	203.2	244.5	267.6	255.7	198.1	242	249	244.8	211.4	211.7
P55265-3	ADAR	Isoform 3 of Double-stranded RNA-specific adenosine deaminase	Homo sapiens	High	8	3539.3	3897.1	4332.1	3427.3	3735.4	3371.8	3714.1	3639.8	3692.8	4173.9
P55265	ADAR	Double-stranded RNA-specific adenosine deaminase	Homo sapiens	High	60	11771.1	11855	11377.9	11847	11263.1	11865.7	11715	11831.3	11317.7	11263.7
P78563	ADARB1	Double-stranded RNA-specific editase 1	Homo sapiens	High	6	220.7	277.2	209.4	267.3	217.8	275.6	194	263.9	202.7	190.5
Q9BUB4	ADAT1	tRNA-specific adenosine deaminase 1	Homo sapiens	High	9	653.5	702.8	738.2	672.2	703.6	688.5	768	691.1	668.1	725.9
Q7Z6V5	ADAT2	tRNA-specific adenosine deaminase 2	Homo sapiens	High	4	490.7	565.3	594.3	572.9	543.2	570.7	468.3	517.7	480.2	547.9
Q96EY9	ADAT3	Probable inactive tRNA-specific adenosine deaminase-like protein 3	Homo sapiens	High	5	507.6	560	590.7	563.3	610	586.3	583.6	554.7	531.5	558.2
Q86TW2	ADCK1	Uncharacterized aarF domain-containing protein kinase 1	Homo sapiens	High	3	67.2	71.2	71.2	67.5	73.1	76	75.6	76.1	61.2	68
Q7Z695	ADCK2	Uncharacterized aarF domain-containing protein kinase 2	Homo sapiens	High	2	37.8	30.9	27.7	41.1	24.9	46.5	31	24.6	36.7	28.4
O60266	ADCY3	Adenylate cyclase type 3	Homo sapiens	High	13	795.6	747	877.4	750	766.5	764.9	767.8	740.6	879.5	870.9
P51828	ADCY7	Adenylate cyclase type 7	Homo sapiens	High	1	57.6	49.3	44.5	47.9	51.2	44.8	44.9	49.4	58.6	59.1
O60503	ADCY9	Adenylate cyclase type 9	Homo sapiens	High	4	97.5	140.8	138.1	129.5	105.8	140.7	138	126.3	106.4	134.6
P35611	ADD1	Alpha-adducin	Homo sapiens	High	25	2709.9	2892.8	2586.9	2894.5	2430.6	3198.3	2675.1	2929.3	2609	2630.2
Q9UEY8	ADD3	Gamma-adducin	Homo sapiens	High	19	2663.7	2680.1	2747.8	2538.2	2333.3	2641.8	2686.5	2596.1	2687.7	2717.2
Q9UEY8-2	ADD3	Isoform 1 of Gamma-adducin	Homo sapiens	High	1	130.5	85.1	149.4	81	105.5	84.7	135.4	76.4	130.5	159.7
P11766	ADH5	Alcohol dehydrogenase class-3	Homo sapiens	High	18	5565.4	5207.4	5156.6	5124.3	5336.8	4674	5594	5289.2	5265.5	5224.1
Q9BV57	ADI1	1,2-dihydroxy-3-keto-5-methylthiopentene dioxygenase	Homo sapiens	High	15	2258.5	2273.7	2444.4	2274.2	2116.5	2275.4	2238.4	2230.4	2225	2450.8
Q96A54	ADIPOR1	Adiponectin receptor protein 1	Homo sapiens	High	2	221.9	225.1	211.5	215.3	185.9	189	263.5	221.4	246.5	240.1
Q86V24	ADIPOR2	Adiponectin receptor protein 2	Homo sapiens	High	1	134.2	119	84.7	108.2	159.1	117.6	137.2	151	137.6	118.1
P55263	ADK	Adenosine kinase	Homo sapiens	High	22	5107.9	4538.4	4672.5	4654	5236.5	4532.2	4941	4831.6	4933.4	4934.1
Q9H2P0	ADNP	Activity-dependent neuroprotector homeobox protein	Homo sapiens	High	44	8015.4	8185.1	8105.1	8092.7	7874	8197.3	7934.4	8275	8051.3	8107.3
Q6IQ32	ADNP2	ADNP homeobox protein 2	Homo sapiens	High	14	1494.5	1473.1	1316	1525.4	1378.3	1498.3	1412.8	1567	1462.1	1422.6
Q96SZ5	ADO	2-aminoethanethiol dioxygenase	Homo sapiens	High	10	1461.8	1410.5	1388.5	1463.1	1582.2	1574.4	1445.5	1502.2	1499.6	1462.2
Q9BRR6	ADPGK	ADP-dependent glucokinase	Homo sapiens	High	7	351.1	300.6	265.9	326.5	348.9	348.9	304.1	326.1	353.9	328
Q9NX46	ADPRHL2	Poly(ADP-ribose) glycohydrolase ARH3	Homo sapiens	High	14	1928.4	1890	2176.8	1899.3	2039.7	1994.3	1856.9	1914	1946.1	2076.9
Q16186	ADRM1	Proteasomal ubiquitin receptor ADRM1	Homo sapiens	High	15	1932.5	2015.9	1982.8	1807.6	2227.1	1654	2256	1986.4	2031.2	2089
P30566	ADSL	Adenylosuccinate lyase	Homo sapiens	High	25	6228.4	6256.6	5903.7	5801.7	6474.8	5821.6	5908	6191.4	6063.2	6206.1
P30520	ADSS	Adenylosuccinate synthetase isozyme 2	Homo sapiens	High	21	5472.6	5219.7	5389.7	5507.4	5620.1	5372.3	5425.2	5280.6	5328.7	5101.4
Q8N142	ADSSL1	Adenylosuccinate synthetase isozyme 1	Homo sapiens	High	1	33.2	36.1	33.4	27.2	30.9	26.5	37.9	28.9	45.1	34.7
Q8IUX7	AEBP1	Adipocyte enhancer-binding protein 1	Homo sapiens	High	7	248.3	310.2	242	285	262.5	341.6	255.4	311.2	264.9	208.5
Q6ZN18	AEBP2	Zinc finger protein AEBP2	Homo sapiens	High	7	367.4	359	339.6	387.9	367.9	398.1	356.1	389.5	378.5	405.2
Q08117	AES	Amino-terminal enhancer of split	Homo sapiens	High	5	416.5	352.5	261.5	378.9	304.3	333.6	324.9	462.2	419.8	337
P55196	AFDN	Afadin	Homo sapiens	High	35	2043.8	1896.7	2165.6	1880.9	2042.1	1937.4	2140.9	1842.6	2076.1	2187
P51825	AFF1	AF4/FMR2 family member 1	Homo sapiens	High	21	967.8	1001.5	1140.6	992.6	1100.4	940.9	1069.5	976.3	954.7	1079
P51816	AFF2	AF4/FMR2 family member 2	Homo sapiens	High	8	271.9	277.2	271	258.6	223.6	253.4	269	276.1	264.4	302.5
P51826	AFF3	AF4/FMR2 family member 3	Homo sapiens	High	3	41.9	54.7	60.9	55.8	54	49.4	51.1	48.4	44	56.4
Q9UHB7	AFF4	AF4/FMR2 family member 4	Homo sapiens	High	19	1248.9	1101.6	1478.2	1157.3	1361.5	1087.6	1340.7	1089.8	1343.5	1400.8
Q9Y4W6	AFG3L2	AFG3-like protein 2	Homo sapiens	High	42	8391.9	8375.8	8257.6	8328.7	8751.3	8423.1	8507.4	8350	8451.2	8318.3
Q63HM1	AFMID	Kynurenine formamidase	Homo sapiens	High	3	65.3	64.4	119.8	60.6	72	74.6	82.2	66.2	67	80
Q6ULP2	AFTPH	Aftiphilin	Homo sapiens	High	28	2161.3	2027.9	2082.3	2080.2	2067.5	2153.4	2069.4	2056.5	2114.6	2149.5
P20933	AGA	N(4)-(beta-N-acetylglucosaminyl)-L-asparaginase	Homo sapiens	High	3	340.3	381	443.4	402.2	467.3	374.3	394.9	355.6	333.2	368.4
Q9UPQ3	AGAP1	Arf-GAP with GTPase, ANK repeat and PH domain-containing protein 1	Homo sapiens	High	2	74.1	76.5	68.4	79.2	53.8	61.7	69.7	75.5	77.3	71.6
Q99490-2	AGAP2	Isoform 2 of Arf-GAP with GTPase, ANK repeat and PH domain-containing protein 2	Homo sapiens	High	3	12.7	10.5	19.4	17.4	13.9	3.8	14.3	12.9	14.2	15.5
Q99490	AGAP2	Arf-GAP with GTPase, ANK repeat and PH domain-containing protein 2	Homo sapiens	High	15	926.7	985.7	1038	1001.7	954.7	1125.1	963.4	956.6	972.3	1000
P52594	AGFG1	Arf-GAP domain and FG repeat-containing protein 1	Homo sapiens	High	12	1504.5	1633.2	1485.7	1640.3	1552.5	1710.7	1587.4	1680.8	1426.7	1447.7
O95081	AGFG2	Arf-GAP domain and FG repeat-containing protein 2	Homo sapiens	High	4	151.7	141.2	126.1	172.8	158.4	154.5	135.7	184.5	160.2	142.8
Q8N302	AGGF1	Angiogenic factor with G patch and FHA domains 1	Homo sapiens	High	14	967.1	1038.1	1151.2	1021.5	1229.1	1052.1	1126.9	991.4	1059.3	1095.8
Q53H12	AGK	Acylglycerol kinase, mitochondrial	Homo sapiens	High	22	3891.1	3979.1	3843	3854.2	4017.4	3939.8	3761.7	3876.7	3775	3750.5
P35573	AGL	Glycogen debranching enzyme	Homo sapiens	High	85	11054.2	10510.8	11312	10717.7	10655.3	10423.5	10975.8	10562.2	11010.6	10941.5
Q9BSE5	AGMAT	Agmatinase, mitochondrial	Homo sapiens	High	9	420.1	426.7	513.7	437.5	452.1	449.9	485.4	439.2	460.2	521.4
Q9UL18	AGO1	Protein argonaute-1	Homo sapiens	High	14	1434.4	1271.7	1315.7	1265.1	1414.7	1280.7	1421.2	1277.7	1468.6	1403.9
Q9UKV8	AGO2	Protein argonaute-2	Homo sapiens	High	23	4146	4238.8	4425.4	4150	4054.9	4263.7	4416.2	4253.7	4222.3	4222.3
Q9H9G7	AGO3	Protein argonaute-3	Homo sapiens	High	10	458.7	403.5	384.8	428.3	491	444.9	425.7	444.1	475.8	456.1
Q99943	AGPAT1	1-acyl-sn-glycerol-3-phosphate acyltransferase alpha	Homo sapiens	High	5	465.3	518.9	526.6	537.6	461.3	570.5	497	526.8	493.1	482.7
O15120	AGPAT2	1-acyl-sn-glycerol-3-phosphate acyltransferase beta	Homo sapiens	High	4	340.9	343.4	270.8	375.5	334.4	402.2	274.7	374.1	355	286.5
Q9NRZ7	AGPAT3	1-acyl-sn-glycerol-3-phosphate acyltransferase gamma	Homo sapiens	High	9	2017.2	1841.5	2133.9	1850	1971.5	1800.2	2053.6	1732.3	2146.1	2065.5
Q9NRZ5	AGPAT4	1-acyl-sn-glycerol-3-phosphate acyltransferase delta	Homo sapiens	High	3	75.1	80.7	99.1	66.6	80.3	65.1	75.5	60.9	80.6	85.9
Q9NUQ2	AGPAT5	1-acyl-sn-glycerol-3-phosphate acyltransferase epsilon	Homo sapiens	High	12	1977	2054.9	2024.9	1859.1	2155	1897.2	2038.8	2060.7	2124.4	1950.5
O00116	AGPS	Alkyldihydroxyacetonephosphate synthase, peroxisomal	Homo sapiens	High	32	4739	4899.7	5436.5	4913.7	5004.1	5085	5454	4820.4	4831	5031.6
O00468	AGRN	Agrin	Homo sapiens	High	3	74.4	91	105	88	76.2	75	108	77.2	83.2	108.8
Q9UPW5	AGTPBP1	Cytosolic carboxypeptidase 1	Homo sapiens	High	12	1047.3	824.3	1256.7	877.7	936.2	972.5	852.5	835.6	979.7	1099.6
Q6RW13	AGTRAP	Type-1 angiotensin II receptor-associated protein	Homo sapiens	High	1	11.2	10	14.4	11.6	6.8	10.9	12.8	10.7	15.8	10.4
Q8WYP5	AHCTF1	Protein ELYS	Homo sapiens	High	82	8272.6	8229	8533.4	8313.9	7982.1	8410.7	8092.2	8401.6	8314.9	8610.4
P23526	AHCY	Adenosylhomocysteinase	Homo sapiens	High	27	9670.1	10467.4	10431	10537.8	10163.7	10146.2	10125.2	10623.8	9594.1	9599.7
O43865	AHCYL1	Adenosylhomocysteinase 2	Homo sapiens	High	16	7913.8	7750	7964.8	8032.3	7936.2	6817.4	7821.5	8032.9	8139.2	7781.8
Q96HN2	AHCYL2	Adenosylhomocysteinase 3	Homo sapiens	High	10	1046.6	1126.6	1253.8	1093.2	1103.4	1025.7	1225.9	1071	1089.3	1182
Q5TGY3	AHDC1	AT-hook DNA-binding motif-containing protein 1	Homo sapiens	High	12	369.1	407.6	416.4	421	377.6	429.5	416.6	405.8	391.1	425.1
Q8N157	AHI1	Jouberin	Homo sapiens	High	2	25.7	24.1	21.9	26.2	27.2	30.7	28.4	36.2	30.9	19.6
Q09666	AHNAK	Neuroblast differentiation-associated protein AHNAK	Homo sapiens	High	3	163.8	150	271.6	162.9	182.4	165.6	202.9	142	168.3	197.2
O95433	AHSA1	Activator of 90 kDa heat shock protein ATPase homolog 1	Homo sapiens	High	28	8441.8	8216.9	8468.5	8301.1	8540.1	8110.3	8405.8	8067.8	8166.3	8199.3
P02765	AHSG	Alpha-2-HS-glycoprotein	Homo sapiens	High	3	84.1	127.7	112.5	126.7	112	106.7	121.5	135.2	83.9	77.1
Q96BJ3	AIDA	Axin interactor, dorsalization-associated protein	Homo sapiens	High	14	1478.6	1434.1	1247.9	1478.3	1436.8	1505.9	1406.6	1577.1	1521.8	1479.3
P55008	AIF1	Allograft inflammatory factor 1	Homo sapiens	High	3	1129.2	693.9	1459.7	817.6	986.2	703.1	1281.6	668.9	1296.6	1413.6
O95831	AIFM1	Apoptosis-inducing factor 1, mitochondrial	Homo sapiens	High	19	4639.4	4571.4	5468.7	4517.9	4802.3	4521	5173	4357.9	4696.2	5099.8
Q9NVV5	AIG1	Androgen-induced gene 1 protein	Homo sapiens	Medium	1	30.8	26	31.4	29.2	32.6	38.5	34.4	24.8	34.8	34.6
Q9Y4K1	AIM1	Absent in melanoma 1 protein	Homo sapiens	High	55	6714.3	6579.7	6770.8	6548.1	6959.4	6449.5	7061.2	6661.2	6785.2	7076.1
Q12904	AIMP1	Aminoacyl tRNA synthase complex-interacting multifunctional protein 1	Homo sapiens	High	21	4246.6	4513.8	3931.5	4517.9	4405.5	4513.6	4233.2	4710.4	4137.5	3931.7
Q13155	AIMP2	Aminoacyl tRNA synthase complex-interacting multifunctional protein 2	Homo sapiens	High	15	1628.2	1527.2	1582.1	1575.5	1747.6	1480	1642.7	1534.2	1665	1605.6
F8W950	AIMP2	Aminoacyl tRNA synthase complex-interacting multifunctional protein 2	Homo sapiens	High	6	1012.9	874.1	931.7	902.7	1068.6	858.5	994.8	926	1000	1030.9
O00170	AIP	AH receptor-interacting protein	Homo sapiens	High	20	4656.9	4356.1	4267.4	4449.9	4512.1	4419.1	4438.6	4696.4	4334.6	4589
Q96IF1	AJUBA	LIM domain-containing protein ajuba	Homo sapiens	High	1	22.2	28.7	31.1	27.2	33.6	27	29.4	29.3	31.1	33.9
P54819	AK2	Adenylate kinase 2, mitochondrial	Homo sapiens	High	19	7825.7	7526.1	8316.5	7192.6	7646.1	7028.5	7569.5	6946.4	7350.6	8184.7
Q9UIJ7	AK3	GTP:AMP phosphotransferase AK3, mitochondrial	Homo sapiens	High	13	2374.8	2090.1	2201.1	2130.3	2396.7	2061.8	2468.3	2309.9	2372.9	2338
P27144	AK4	Adenylate kinase 4, mitochondrial	Homo sapiens	High	7	1350.9	1563.3	1120.7	1258.3	1109.7	1361.8	1204.4	1425.5	1144.5	1128.9
Q9Y3D8	AK6	Adenylate kinase isoenzyme 6	Homo sapiens	High	7	647.8	700.3	1042.2	732.7	798.9	804.8	724.3	627.5	678.8	871.6
Q96M32	AK7	Adenylate kinase 7	Homo sapiens	High	6	222.2	213.2	255	229.8	176.3	204.3	212.5	215.7	200.9	203.5
Q92667	AKAP1	A-kinase anchor protein 1, mitochondrial	Homo sapiens	High	34	4773.8	4792.3	4478.4	4890.1	4852.5	5016.6	4840.5	5002.2	4644.2	4840
O43572	AKAP10	A-kinase anchor protein 10, mitochondrial	Homo sapiens	High	14	431	510.4	476.1	495.3	439.4	555.1	453	482.5	446.7	432.4
Q9UKA4	AKAP11	A-kinase anchor protein 11	Homo sapiens	High	43	3062.8	2947.6	3084.1	2980	2903.4	3117.8	3208.7	2934.4	3077.9	3233.6
Q12802	AKAP13	A-kinase anchor protein 13	Homo sapiens	High	17	1236.1	1239.2	1137.6	1235.6	1403.6	1374.5	1311.2	1294.4	1322.3	1273.3
Q02040	AKAP17A	A-kinase anchor protein 17A	Homo sapiens	High	12	1497	1642.3	1789.6	1593.2	1571.9	1761.8	1618.1	1554.1	1561.9	1651.5
Q9Y2D5	AKAP2	A-kinase anchor protein 2	Homo sapiens	High	34	4163	4437	4630.6	4436.2	2998.3	4507	4424.1	4327	4082.9	4398.4
Q9P0M2	AKAP7	A-kinase anchor protein 7 isoform gamma	Homo sapiens	High	1	10	13.1	17.5	15.4	13.8	12.9	17.1	7.1	14.2	16.8
O43823	AKAP8	A-kinase anchor protein 8	Homo sapiens	High	25	3085.3	3131.8	2639.3	3210.6	3366.5	3190.4	2749.1	3256.4	2993.3	2858.7
Q9ULX6	AKAP8L	A-kinase anchor protein 8-like	Homo sapiens	High	18	1980.2	1966.9	1823.9	1967.9	2093.4	2001.7	1837.2	1937.3	2019	1919.7
V9GZ50	AKAP8L	A kinase (PRKA) anchor protein 8-like, isoform CRA_c	Homo sapiens	High	3	20.9	18.1	19.9	19.1	15.5	16.7	14.4	17.8	20.8	23.5
Q99996	AKAP9	A-kinase anchor protein 9	Homo sapiens	High	141	9300.2	9490.7	10403.4	9234.1	8419.7	9660.8	9937.7	9028.9	9317.3	10247.9
Q9NQ31	AKIP1	A-kinase-interacting protein 1	Homo sapiens	High	2	253.7	262.2	296	261.5	243	264.6	271	248.8	288.9	317.6
Q9H9L7	AKIRIN1	Akirin-1	Homo sapiens	High	1	34	35.5	55.2	40.5	46.1	48.7	50.6	45.9	39.3	52.9
Q53H80	AKIRIN2	Akirin-2	Homo sapiens	High	4	357.9	366.7	555.2	417.2	456	441	466.5	376	434	461
Q7Z591	AKNA	AT-hook-containing transcription factor	Homo sapiens	High	27	1606.7	1613	1672.7	1601.5	1256.4	1629.8	1574.5	1604.3	1606.9	1667.1
P14550	AKR1A1	Alcohol dehydrogenase [NADP(+)]	Homo sapiens	High	20	3945.2	3948.8	4123	3945.7	3904.8	3835.8	4123.3	3955.4	3980	4016.3
P15121	AKR1B1	Aldose reductase	Homo sapiens	High	18	4000.9	3785.8	3499	3906.4	3822	3672.3	3666.8	4053.5	3805.8	3502.5
C9JRZ8	AKR1B15	Aldo-keto reductase family 1 member B15	Homo sapiens	High	2	454.3	437.9	134.7	420.6	580.4	421.9	275.4	561.3	648.1	259.3
B4DK69	AKR1C2	Aldo-keto reductase family 1 member C2	Homo sapiens	Medium	1	26.7	28.7	26.6	30.6	28.8	36.2	20.9	28.4	29.7	26.1
P52895	AKR1C2	Aldo-keto reductase family 1 member C2	Homo sapiens	High	4	129.2	111.9	111.5	138.1	136.1	130.1	102.6	127.9	131	131.9
P42330	AKR1C3	Aldo-keto reductase family 1 member C3	Homo sapiens	High	11	3815	3321.5	3184.8	3479.9	3728.4	3348.6	3379.7	3505.9	3635.5	3455.2
O43488	AKR7A2	Aflatoxin B1 aldehyde reductase member 2	Homo sapiens	High	12	2038.2	2046.2	2029.8	2006.3	1826.5	1892.3	2103.6	2066.9	1911.4	2006.9
P31749	AKT1	RAC-alpha serine/threonine-protein kinase	Homo sapiens	High	11	1905.7	2120.7	2201.3	1999.8	1611.4	1970.7	2082.7	1963	1900	1941.3
Q96B36	AKT1S1	Proline-rich AKT1 substrate 1	Homo sapiens	High	2	179.2	184.7	140.5	186.1	204.5	178.7	149.8	187.3	182.5	157.3
P31751	AKT2	RAC-beta serine/threonine-protein kinase	Homo sapiens	High	14	3740	3709.3	4035.7	3714.9	3544.7	3704.3	3881.6	3598	3730	3869.4
Q9Y243	AKT3	RAC-gamma serine/threonine-protein kinase	Homo sapiens	High	4	285.6	290.6	308.4	291.9	306.4	302.4	272.8	248.1	337.1	326.6
Q9H8T0	AKTIP	AKT-interacting protein	Homo sapiens	High	1	42.3	54.5	51.6	51.5	50.3	60.6	58.2	48	48.6	60.2
P13716	ALAD	Delta-aminolevulinic acid dehydratase	Homo sapiens	High	8	1036.8	1092.3	1051.4	1084.2	993.2	1064.1	1052.5	1121	1000	985.8
P13196	ALAS1	5-aminolevulinate synthase, nonspecific, mitochondrial	Homo sapiens	High	20	1958.3	2067	2006.3	2042	1642.8	2267.7	2002.4	2023.8	2040.8	2018.8
Q13740	ALCAM	CD166 antigen	Homo sapiens	High	13	2175.5	2198.2	2150.6	2044.6	2003.5	1828.5	2186.3	2142.7	2095.2	2109.6
Q8IZ83	ALDH16A1	Aldehyde dehydrogenase family 16 member A1	Homo sapiens	High	19	3344.6	3121.2	3620.1	3055.2	3400.2	3116.4	3362.7	3036.5	3255.1	3373.9
P54886	ALDH18A1	Delta-1-pyrroline-5-carboxylate synthase	Homo sapiens	High	45	8351.3	7993.7	8244.9	8560.6	8697.3	8393.6	8350.9	8482.2	8221.2	8218.1
P00352	ALDH1A1	Retinal dehydrogenase 1	Homo sapiens	High	1	34.8	47.8	49.1	38.9	44	49.4	36.2	43.7	44	46.1
O94788	ALDH1A2	Retinal dehydrogenase 2	Homo sapiens	High	18	2125.6	2038	1944	2014.4	1890.9	2029.8	2057.9	2210.5	2105.7	1978.6
P30837	ALDH1B1	Aldehyde dehydrogenase X, mitochondrial	Homo sapiens	High	17	3005.6	3239.8	2752.4	3328.9	3282.3	3360	2854.1	3455	2987.6	3006
P30038	ALDH4A1	Delta-1-pyrroline-5-carboxylate dehydrogenase, mitochondrial	Homo sapiens	High	13	1453.3	1472.7	1455.2	1598.8	1525.2	1755.9	1479.7	1505.3	1478.2	1485
P51649	ALDH5A1	Succinate-semialdehyde dehydrogenase, mitochondrial	Homo sapiens	High	20	3387	3285.6	2817.2	3207.7	3356.6	3270.1	3037.5	3437.1	3288.1	2915.7
Q02252	ALDH6A1	Methylmalonate-semialdehyde dehydrogenase [acylating], mitochondrial	Homo sapiens	High	29	5360.4	5055.9	4978.2	5139.5	5162.9	4602.1	5291.5	5441.9	5197.5	5173.1
P49189	ALDH9A1	4-trimethylaminobutyraldehyde dehydrogenase	Homo sapiens	High	21	6642.2	6538.1	6250.4	6474	6657.3	6017.7	6435.4	6882.3	6454.8	6308.3
P04075-2	ALDOA	Isoform 2 of Fructose-bisphosphate aldolase A	Homo sapiens	High	10	143	155.8	171.5	159.7	164.5	161.9	163.4	127.9	174.8	152.7
P04075	ALDOA	Fructose-bisphosphate aldolase A	Homo sapiens	High	36	18566.4	17270	14984.5	17246.2	16554.4	15890.6	15491.5	17248.3	18123	15767.5
P09972	ALDOC	Fructose-bisphosphate aldolase C	Homo sapiens	High	27	6726.1	6555.2	5802.2	5904.1	5310.5	5824.5	5987.7	6617.2	5942.8	5859.1
Q9BT22	ALG1	Chitobiosyldiphosphodolichol beta-mannosyltransferase	Homo sapiens	High	8	1056.2	1025.3	1115.7	1021.8	1129.1	1161.5	1099.5	1033.9	1098.4	1105.8
Q5BKT4	ALG10	Dol-P-Glc:Glc(2)Man(9)GlcNAc(2)-PP-Dol alpha-1,2-glucosyltransferase	Homo sapiens	High	4	265.7	272.5	295.6	264	274.8	294.5	289.5	261.5	284.6	287
Q2TAA5	ALG11	GDP-Man:Man(3)GlcNAc(2)-PP-Dol alpha-1,2-mannosyltransferase	Homo sapiens	High	8	214.5	251.2	259.3	238.8	246.7	284.3	240.4	222.7	222.9	234
Q9BV10	ALG12	Dol-P-Man:Man(7)GlcNAc(2)-PP-Dol alpha-1,6-mannosyltransferase	Homo sapiens	High	4	257.7	261.4	242.8	253.6	280	259	237.9	252.8	287.6	283.6
Q9NP73	ALG13	Putative bifunctional UDP-N-acetylglucosamine transferase and deubiquitinase ALG13	Homo sapiens	High	7	654.6	546.8	388.5	610.1	747.3	614.5	490.3	691.1	635.3	521.6
Q9H553	ALG2	Alpha-1,3/1,6-mannosyltransferase ALG2	Homo sapiens	High	10	932.8	1071.4	1000.6	1079.6	1007	1146	1004.1	1074.7	927.9	988.8
Q92685	ALG3	Dol-P-Man:Man(5)GlcNAc(2)-PP-Dol alpha-1,3-mannosyltransferase	Homo sapiens	High	3	334.6	360	431.2	361	371.2	381.5	374.9	319.6	368.4	381.7
Q9Y673	ALG5	Dolichyl-phosphate beta-glucosyltransferase	Homo sapiens	High	14	2173.8	2222.8	2368.2	2183.2	2469.4	2300	2384.8	2231.4	2255.4	2260.8
Q9Y672	ALG6	Dolichyl pyrophosphate Man9GlcNAc2 alpha-1,3-glucosyltransferase	Homo sapiens	High	4	374.8	342.6	376.8	344.5	418.2	356.2	362.2	351.4	390.4	409.5
Q9BVK2	ALG8	Probable dolichyl pyrophosphate Glc1Man9GlcNAc2 alpha-1,3-glucosyltransferase	Homo sapiens	High	4	761.9	692.1	852.1	714.6	788.8	668	851.3	640.1	812.8	802.8
Q9H6U8	ALG9	Alpha-1,2-mannosyltransferase ALG9	Homo sapiens	High	8	605.2	572.8	562.6	576.6	610.1	633.7	534.9	545.7	543.6	589.5
Q13686	ALKBH1	DNA demethylase ALKBH1	Homo sapiens	High	8	209.3	229	240.7	231	203.9	243.8	221.7	222	195.2	196.9
Q6NS38	ALKBH2	DNA oxidative demethylase ALKBH2	Homo sapiens	High	5	508.4	733.5	617.5	683.2	539.9	767.6	617.3	698.1	529.4	581.4
Q96Q83	ALKBH3	Alpha-ketoglutarate-dependent dioxygenase alkB homolog 3	Homo sapiens	High	13	745.3	709.1	616.3	719.3	738	782.1	664	764.8	731.5	680.1
Q9NXW9	ALKBH4	Alpha-ketoglutarate-dependent dioxygenase alkB homolog 4	Homo sapiens	High	6	209.3	222.8	261.2	227.2	207.9	228.2	250.7	207.9	237.5	250.7
Q6P6C2	ALKBH5	RNA demethylase ALKBH5	Homo sapiens	High	13	1291	1314.9	1189.7	1177.2	1162.2	1232.7	1249	1297.2	1164.8	1172.4
Q3KRA9	ALKBH6	Alpha-ketoglutarate-dependent dioxygenase alkB homolog 6	Homo sapiens	High	3	130.9	147.9	152	134.7	152.6	137.4	149	142.3	147	161.1
Q9BT30	ALKBH7	Alpha-ketoglutarate-dependent dioxygenase alkB homolog 7, mitochondrial	Homo sapiens	High	4	24.7	28.3	24	30.2	31.4	33.6	21.7	29.6	29.7	19.4
Q96BT7	ALKBH8	Alkylated DNA repair protein alkB homolog 8	Homo sapiens	High	17	789.9	795.7	871.9	851.8	868	904.1	869.3	800.8	816.5	831.1
Q8TCU4	ALMS1	Alstrom syndrome protein 1	Homo sapiens	High	51	3228.9	3310.4	3632.8	3297.1	2917.7	3506	3474.4	3136.5	3355.3	3613.5
P20292	ALOX5AP	Arachidonate 5-lipoxygenase-activating protein	Homo sapiens	High	3	174.4	187.8	177	175.6	189.6	193.2	181.1	169.9	185.3	180.8
Q96QP1	ALPK1	Alpha-protein kinase 1	Homo sapiens	High	13	865.5	851.7	770.3	811.4	819.3	854.4	800.9	825.1	880.6	825.1
Q96Q42	ALS2	Alsin	Homo sapiens	High	21	1452.8	1576.9	1393.1	1535.5	1490	1694.1	1402.9	1505.5	1401.6	1422.7
Q86V81	ALYREF	THO complex subunit 4	Homo sapiens	High	10	1581.1	1759.1	1795.1	1733.1	1545.6	1641.3	1684.4	1724.8	1655.4	1780.9
Q9UHK6	AMACR	Alpha-methylacyl-CoA racemase	Homo sapiens	High	2	29.4	25.9	33	29.8	25.7	27.5	30.7	27.6	30.4	29.3
Q9C0C7	AMBRA1	Activating molecule in BECN1-regulated autophagy protein 1	Homo sapiens	High	13	472.1	628.6	505.5	617.6	474.2	624.6	502.2	611.7	467.4	480.8
P17707	AMD1	S-adenosylmethionine decarboxylase proenzyme	Homo sapiens	High	7	392.5	386.9	519	504.9	501.8	471.1	539.8	467.4	453.8	532.2
Q9Y303	AMDHD2	N-acetylglucosamine-6-phosphate deacetylase	Homo sapiens	High	9	317.6	300.9	293.6	303.6	295.8	277.8	295	310.4	306.9	301.6
Q5JTC6	AMER1	APC membrane recruitment protein 1	Homo sapiens	High	4	83.8	95.5	114.6	109.7	103.9	128.7	93.7	101.7	98.7	112.3
Q9UKV5	AMFR	E3 ubiquitin-protein ligase AMFR	Homo sapiens	High	10	443.1	417	443.9	408.5	403	418.9	403.9	442.4	435.3	434.9
Q9Y4X0	AMMECR1	AMME syndrome candidate gene 1 protein	Homo sapiens	High	4	581.8	602.8	679.6	592.9	635.4	627.5	713.7	608	603.5	679.1
Q6DCA0	AMMECR1L	AMMECR1-like protein	Homo sapiens	High	3	96.5	89.4	88.6	99.4	94.2	106.8	105	100.5	113.2	103.4
P23109	AMPD1	AMP deaminase 1	Homo sapiens	High	1	118.3	103.2	108.3	118.5	110.4	143.9	111.3	112.5	111.5	127.8
Q01433	AMPD2	AMP deaminase 2	Homo sapiens	High	37	6784.2	6451.9	5766.4	6368.3	6659.5	6271.5	6052.7	6523.9	6411.9	6179.4
Q01432	AMPD3	AMP deaminase 3	Homo sapiens	High	10	543.8	546.7	468.2	489.4	459.4	456.1	473.8	557.1	506.3	478.8
Q86W34	AMZ2	Archaemetzincin-2	Homo sapiens	High	6	829.8	863.5	887.4	831	700.4	893	894.7	799.2	836	816
Q9H1A4	ANAPC1	Anaphase-promoting complex subunit 1	Homo sapiens	High	49	5589.4	5615.3	5345.7	5797.6	5663	6051.5	5586.8	5744.1	5673.8	5562
Q9UM13	ANAPC10	Anaphase-promoting complex subunit 10	Homo sapiens	High	3	223.2	235	261.7	228.6	245.5	232.5	265.1	230.2	263.9	264.2
Q9BS18	ANAPC13	Anaphase-promoting complex subunit 13	Homo sapiens	High	4	243	253.6	303.6	246.1	259.1	281.8	295.8	254.7	275.6	258.7
Q96DE5	ANAPC16	Anaphase-promoting complex subunit 16	Homo sapiens	High	5	364.9	329.5	295.8	343.2	377.3	321.9	290.3	365.4	367.4	327.9
Q9UJX6	ANAPC2	Anaphase-promoting complex subunit 2	Homo sapiens	High	21	1902.6	1954.4	2312.1	1960.7	2033.7	2033.5	2113.5	1958.9	2010.7	2088.2
Q9UJX5	ANAPC4	Anaphase-promoting complex subunit 4	Homo sapiens	High	19	1542.1	1554.9	1682.4	1584.2	1566.9	1648.5	1728	1535.9	1633.1	1686.4
Q9UJX4	ANAPC5	Anaphase-promoting complex subunit 5	Homo sapiens	High	32	3472.4	3590.6	3595.5	3527.6	3356.8	3679.9	3591.6	3408.9	3533.5	3547.8
Q9UJX3	ANAPC7	Anaphase-promoting complex subunit 7	Homo sapiens	High	22	3898.1	3805.4	3839.4	3975.3	4021.1	3957.4	3806.3	3889.3	3928.6	3800.6
Q9UNK9	ANGEL1	Protein angel homolog 1	Homo sapiens	High	4	98.2	105.6	116.6	112.1	97.3	132.5	110.1	100.5	99.2	114
Q5VTE6	ANGEL2	Protein angel homolog 2	Homo sapiens	High	8	664.9	712.6	564.3	673.4	645.6	679.1	677.7	724.5	700.7	578.1
Q15389	ANGPT1	Angiopoietin-1	Homo sapiens	High	4	86.7	136.7	115.8	123.6	111.7	145.6	108.5	134.3	99.7	92.8
Q8NI99	ANGPTL6	Angiopoietin-related protein 6	Homo sapiens	High	1	32	38.5	45.7	30.2	44.9	45.3	30.7	32.6	30	35.1
Q01484	ANK2	Ankyrin-2	Homo sapiens	High	19	498.8	512.4	607	500.6	553.4	550.1	586.1	476.6	536.2	597.3
I6L894	ANK2	Ankyrin-2	Homo sapiens	Medium	1	15.4	11.9	14	13.8	14.9	17.2	12.7	17.1	15.9	11.3
Q9P2R3	ANKFY1	Rabankyrin-5	Homo sapiens	High	37	5139	5295.2	5008.7	5304.7	5088.6	5468.7	4932.1	5335	5065.2	5175.3
Q9HCJ1	ANKH	Progressive ankylosis protein homolog	Homo sapiens	High	7	234.2	251.7	285.2	262	235	277.4	263.6	246.6	244.5	248.6
Q8IWZ3	ANKHD1	Ankyrin repeat and KH domain-containing protein 1	Homo sapiens	High	49	3785.4	3784.4	3953.8	3726.3	3364.3	3912.8	3787	3742.7	3829.8	4071.1
Q8IWZ3-6	ANKHD1	Isoform 6 of Ankyrin repeat and KH domain-containing protein 1	Homo sapiens	High	10	657	655.7	652.1	681.2	541.6	657.4	655.6	662.1	646.9	652.4
Q9P2G1	ANKIB1	Ankyrin repeat and IBR domain-containing protein 1	Homo sapiens	High	9	441	501.2	514.8	569.9	489.4	524.9	476.9	466.6	551.5	525.7
Q8NAG6	ANKLE1	Ankyrin repeat and LEM domain-containing protein 1	Homo sapiens	High	3	244	251.2	215.1	243.9	345.6	246.6	259.5	265.2	287.3	258.5
Q86XL3	ANKLE2	Ankyrin repeat and LEM domain-containing protein 2	Homo sapiens	High	35	3461.9	3573.8	3233.8	3675.1	3548.5	3893.5	3437.8	3777.3	3455.9	3559.4
Q8IV38	ANKMY2	Ankyrin repeat and MYND domain-containing protein 2	Homo sapiens	High	23	2323	2435.4	2396.4	2388.2	1844.6	2549.3	2470.2	2472.1	2324.1	2469.6
Q9H9E1	ANKRA2	Ankyrin repeat family A protein 2	Homo sapiens	High	1	127.4	109.4	115.7	117.9	134.9	119.9	137.9	127.9	140.1	96.6
Q9NXR5	ANKRD10	Ankyrin repeat domain-containing protein 10	Homo sapiens	High	4	103	97.9	101.1	109.3	121.7	124.7	93.1	92.1	96.3	106.5
Q6UB99	ANKRD11	Ankyrin repeat domain-containing protein 11	Homo sapiens	High	31	2097.1	2180.2	1925.2	2041.6	1872.9	2000.1	1878.4	2235	2092.8	1947.3
Q6UB98	ANKRD12	Ankyrin repeat domain-containing protein 12	Homo sapiens	High	15	737.5	680.6	1329	710.6	573.9	749.7	790	652.9	703.9	991.9
Q8IZ07	ANKRD13A	Ankyrin repeat domain-containing protein 13A	Homo sapiens	High	19	1227.4	1237.7	1534.7	1265.8	1192.5	1338.5	1435.2	1224.2	1263.5	1441.7
Q8N6S4	ANKRD13C	Ankyrin repeat domain-containing protein 13C	Homo sapiens	High	4	48.9	46	64.1	53.5	66.6	54.9	59.1	42.5	49.4	71.6
Q6ZTN6	ANKRD13D	Ankyrin repeat domain-containing protein 13D	Homo sapiens	High	2	74.8	95.6	93.4	76.7	86.6	91.1	73.6	85	79.4	83.4
Q6P6B7	ANKRD16	Ankyrin repeat domain-containing protein 16	Homo sapiens	High	1	23.7	21.7	11.5	22.5	17.1	17.7	19.3	20	15.5	20.8
O75179	ANKRD17	Ankyrin repeat domain-containing protein 17	Homo sapiens	High	48	7202.3	7229.9	8045.9	7457.3	7753.2	7538	7870.5	7162.3	7310.7	8043.1
Q4UJ75	ANKRD20A4	Ankyrin repeat domain-containing protein 20A4	Homo sapiens	High	2	26.6	36.1	31.2	35.7	30.6	33	41.2	33.8	25.5	30.9
Q9UPS8	ANKRD26	Ankyrin repeat domain-containing protein 26	Homo sapiens	Medium	1	34.5	34.3	53.8	37.5	33	32.9	43.1	31.5	33.7	49.3
Q96NW4	ANKRD27	Ankyrin repeat domain-containing protein 27	Homo sapiens	High	26	2068.8	2157.3	2343.9	2116.1	2019.4	2159.9	2210.3	2059.7	2106.4	2244.9
O15084	ANKRD28	Serine/threonine-protein phosphatase 6 regulatory ankyrin repeat subunit A	Homo sapiens	High	27	3705	3704.1	3403.6	3796	3756	3798.6	3595.2	3855.7	3612.2	3689.4
Q9BXX2	ANKRD30B	Ankyrin repeat domain-containing protein 30B	Homo sapiens	High	1	20.5	23.7	22.7	24.8	25.7	27.6	28	18.9	22.7	23.4
Q5JPF3	ANKRD36C	Ankyrin repeat domain-containing protein 36C	Homo sapiens	High	3	58.6	63.1	77.4	60.9	45.9	53.1	51.3	47.7	60.8	54.1
Q53RE8	ANKRD39	Ankyrin repeat domain-containing protein 39	Homo sapiens	High	4	345.1	297.8	368.8	349.2	290.6	351.8	332.5	306.1	345.9	395
Q6AI12	ANKRD40	Ankyrin repeat domain-containing protein 40	Homo sapiens	High	4	118.2	91.4	117	125.8	100.6	118	106.6	108.5	113.7	125.5
Q86W74	ANKRD46	Ankyrin repeat domain-containing protein 46	Homo sapiens	High	5	782.1	741.7	585.2	830	741.3	811.6	593.3	843.3	770.3	710.2
Q8WVL7	ANKRD49	Ankyrin repeat domain-containing protein 49	Homo sapiens	High	3	209.7	205.3	138.4	202.6	254.8	196.2	167	219.8	228.2	190.2
Q9ULJ7	ANKRD50	Ankyrin repeat domain-containing protein 50	Homo sapiens	High	27	1741.6	1746.8	1781.1	1787.8	1723.9	1768.8	1810.2	1722.2	1783.7	1785.3
Q8NB46	ANKRD52	Serine/threonine-protein phosphatase 6 regulatory ankyrin repeat subunit C	Homo sapiens	High	15	1074	1064.5	1079.7	1089.5	1169.9	1237.7	1192.6	1133	1121.5	1157.9
Q6NXT1	ANKRD54	Ankyrin repeat domain-containing protein 54	Homo sapiens	High	8	1023.1	908.2	789.5	942.5	1042.3	1007.5	890.8	976.9	992.2	882.6
Q92625	ANKS1A	Ankyrin repeat and SAM domain-containing protein 1A	Homo sapiens	High	30	3038	3238	3490.9	3226.8	3352.1	3541.4	3411.6	3360.9	3076	3268.3
Q68DC2	ANKS6	Ankyrin repeat and SAM domain-containing protein 6	Homo sapiens	High	5	350.5	361.6	265.6	344.1	333.9	404	329.2	404.5	368.2	326.1
Q9H8Y5	ANKZF1	Ankyrin repeat and zinc finger domain-containing protein 1	Homo sapiens	High	26	3367.5	3010.3	3266.1	2821.4	3017.5	2982.2	3142.8	2845.9	3253.1	3230.7
Q9NQW6	ANLN	Anillin	Homo sapiens	High	34	2889.2	3120.4	3302.4	3289.5	4804.6	3483.3	3339.3	3286.5	2929.7	3089.5
Q9NW15	ANO10	Anoctamin-10	Homo sapiens	Medium	1	59.2	63.9	36.3	29.7	52.5	39.1	37.8	35.4	25.8	33.2
Q4KMQ2	ANO6	Anoctamin-6	Homo sapiens	High	20	2022.7	1949.6	1575.7	1949.8	1903	1951.6	1727.9	2036.1	2035	1757.8
P39687	ANP32A	Acidic leucine-rich nuclear phosphoprotein 32 family member A	Homo sapiens	High	13	5234.2	5107.6	5109.5	5241.1	5019.9	4788.9	5108.3	4657.3	5354.7	5008.2
Q92688	ANP32B	Acidic leucine-rich nuclear phosphoprotein 32 family member B	Homo sapiens	High	8	4523.1	4264.2	4299.4	4800.2	4544.9	3734	4588	4060.6	5207.3	4560.7
Q9BTT0	ANP32E	Acidic leucine-rich nuclear phosphoprotein 32 family member E	Homo sapiens	High	11	3116.1	3001.9	2984	3104.8	3080.5	2604.3	3008	2882.9	3298.9	3103.7
P58335	ANTXR2	Anthrax toxin receptor 2	Homo sapiens	High	15	2185.2	2053.1	2544.1	2192.2	2526.1	2162.6	2576.1	2103.5	2343.8	2659.1
P04083	ANXA1	Annexin A1	Homo sapiens	High	26	6448.8	6274.3	5567.5	6258.8	6129.5	5906	5816.3	6365.5	5900.9	6241.2
P50995	ANXA11	Annexin A11	Homo sapiens	High	21	4042.1	3935.6	4726.8	3904.6	3896	3817	4252.6	3846.6	4115.5	4467.4
P07355	ANXA2	Annexin A2	Homo sapiens	High	33	10074.1	10229.9	10439.2	10361.9	10334.9	9883.7	10639.1	10126.9	10087.5	10464.1
P12429	ANXA3	Annexin A3	Homo sapiens	High	24	3651.6	4324.2	4001.3	4241	3784.4	4224.6	3803.3	4205.3	3459.1	3683.4
P09525	ANXA4	Annexin A4	Homo sapiens	High	22	2728.7	3114.6	2781.3	2951.7	2745.3	3094.2	2861.4	2856.4	2674.1	2654.8
E5RK69	ANXA6	Annexin	Homo sapiens	High	8	295.1	348	328.8	279.6	282.2	336.9	307.6	298.6	287.8	234.1
P08133	ANXA6	Annexin A6	Homo sapiens	High	57	20462.8	19745.1	19813.3	19182.3	20089.5	18781.9	19887	19620.6	19649.8	19704.4
P20073	ANXA7	Annexin A7	Homo sapiens	High	15	3547.1	3530.8	3580.2	3663.7	3719.9	3674.9	3684.4	3639.6	3572.1	3748.8
Q63HQ0	AP1AR	AP-1 complex-associated regulatory protein	Homo sapiens	High	7	644.5	605.8	785.1	605.4	640.7	573.7	747.2	567.8	648.4	791.1
Q10567	AP1B1	AP-1 complex subunit beta-1	Homo sapiens	High	25	5783.4	5751.8	5016.3	6004.4	5824.5	6125	5425.6	5891.5	5623.2	5226
O43747	AP1G1	AP-1 complex subunit gamma-1	Homo sapiens	High	27	5996.2	5837.5	5084	6010.2	5945.2	6154.3	5514.4	6225.6	5797.4	5550.1
O75843	AP1G2	AP-1 complex subunit gamma-like 2	Homo sapiens	High	19	1439.9	1566.6	1533.1	1584.4	1340.9	1589.3	1418.4	1587.2	1429.3	1431.5
Q9BXS5	AP1M1	AP-1 complex subunit mu-1	Homo sapiens	High	22	3519.4	3458.2	3798.2	3507.7	3658.9	3445.2	3960	3550.3	3567.1	3571.5
P61966	AP1S1	AP-1 complex subunit sigma-1A	Homo sapiens	High	4	586.3	579.1	593.4	589.6	568.2	602.4	585	555.4	599.6	608
P56377	AP1S2	AP-1 complex subunit sigma-2	Homo sapiens	High	2	321	261.5	279.7	275.4	295.6	278.9	287.9	274.1	324	279.4
O95782	AP2A1	AP-2 complex subunit alpha-1	Homo sapiens	High	31	7891.6	7969.5	8019.8	8024.8	7847.4	8046.9	8415.4	8209.7	7713.5	8038.4
O94973	AP2A2	AP-2 complex subunit alpha-2	Homo sapiens	High	27	3821.5	3670.2	3783.7	3698.1	3689.5	3696.4	3771.6	3632.8	3699.2	3771.1
P63010	AP2B1	AP-2 complex subunit beta	Homo sapiens	High	27	10277.8	9623.6	10843.5	9938.2	10049.9	9959.7	10730.2	9672	10211	10229.3
Q96CW1	AP2M1	AP-2 complex subunit mu	Homo sapiens	High	22	4139.8	4241.1	4108.3	4305.7	3925.5	4466.3	4167.4	4112.5	4026.4	4117.7
P53680	AP2S1	AP-2 complex subunit sigma	Homo sapiens	High	7	1527.2	1760.5	1824.2	1583.4	1507	1644.9	1750.2	1615.2	1552	1656
O00203	AP3B1	AP-3 complex subunit beta-1	Homo sapiens	High	48	10869.3	11973.7	9432.4	11989.5	10644.1	12442.1	10069.3	12538	10420.4	9541.5
O14617	AP3D1	AP-3 complex subunit delta-1	Homo sapiens	High	42	6902.7	6576.1	6475.7	6574.4	6767.3	6829	6804.7	6581.8	7148.1	6702.4
Q9Y2T2	AP3M1	AP-3 complex subunit mu-1	Homo sapiens	High	15	2701.2	2489.9	2161.9	2634.7	2611	2582.2	2387	2785.1	2542	2367.8
P53677	AP3M2	AP-3 complex subunit mu-2	Homo sapiens	High	2	130.4	115.8	153.1	118.5	128.8	119.8	164.8	123.4	144.7	159.7
Q92572	AP3S1	AP-3 complex subunit sigma-1	Homo sapiens	High	11	1021.1	1040	964.4	1061.3	1054.7	1058.7	1039.6	1025.7	1011.2	1015.8
Q9Y6B7	AP4B1	AP-4 complex subunit beta-1	Homo sapiens	High	12	1194.7	1126.6	1212.4	1198.6	1272.6	1165.3	1293.5	1196	1198.8	1235
Q9UPM8	AP4E1	AP-4 complex subunit epsilon-1	Homo sapiens	High	20	1843	2063.2	1875.7	2086.4	1981.9	2171	1947.1	2190	2023.1	1964.9
O00189	AP4M1	AP-4 complex subunit mu-1	Homo sapiens	High	10	544.1	520.7	596.4	536.2	560.5	554.6	537.4	528	552.4	553.8
Q9Y587	AP4S1	AP-4 complex subunit sigma-1	Homo sapiens	High	5	382	282.7	269.3	298.1	332.1	255.4	348.4	347.7	352.6	280.4
Q2VPB7	AP5B1	AP-5 complex subunit beta-1	Homo sapiens	High	8	249.9	299.9	268.9	276.6	235	294.1	252.3	259.3	247	252.2
Q9H0R1	AP5M1	AP-5 complex subunit mu-1	Homo sapiens	High	3	38.8	55.4	47.6	58.1	46	47.5	41.6	58.9	43.6	52.5
Q9NUS5	AP5S1	AP-5 complex subunit sigma-1	Homo sapiens	High	3	87.7	86.7	72.6	92.8	88.3	100.8	77	103.2	102.4	97.9
O43299	AP5Z1	AP-5 complex subunit zeta-1	Homo sapiens	High	10	637.8	651.8	669	653.4	589.8	659.2	641.2	703.8	645.1	691.8
O14727	APAF1	Apoptotic protease-activating factor 1	Homo sapiens	High	25	3652	3946.6	3800.1	3826.7	3370.9	3779.9	3602.7	3848.3	3588	3757.4
O96018	APBA3	Amyloid beta A4 precursor protein-binding family A member 3	Homo sapiens	High	2	82.8	92	112.7	91.6	90.5	95.8	113	81.4	78.4	98.3
O00213	APBB1	Amyloid beta A4 precursor protein-binding family B member 1	Homo sapiens	High	1	46.3	49.7	49.4	45.5	33.5	44.5	54.3	49.6	46.4	51.7
Q7Z5R6	APBB1IP	Amyloid beta A4 precursor protein-binding family B member 1-interacting protein	Homo sapiens	High	20	4039.7	3746.9	3470.6	3758.1	3629.2	3762.2	3664	3986.5	3812.7	3498.7
P25054	APC	Adenomatous polyposis coli protein	Homo sapiens	High	32	1978.2	1940.1	1903.7	2049.2	2068.8	1991.4	1925.7	1950.8	2070.3	2066
P13798	APEH	Acylamino-acid-releasing enzyme	Homo sapiens	High	28	3524.9	3439.6	3403	3496.7	3570.7	3463.9	3424.6	3428.3	3468.2	3406
P27695	APEX1	DNA-(apurinic or apyrimidinic site) lyase	Homo sapiens	High	24	5577.7	4942.1	4499.5	4986.5	5547.1	4884.4	4713.6	5439.8	5192.5	4898.2
Q9UBZ4	APEX2	DNA-(apurinic or apyrimidinic site) lyase 2	Homo sapiens	High	5	109.2	94.3	138.7	102.7	99	102.8	130.3	87.2	126	140.1
Q96BI3	APH1A	Gamma-secretase subunit APH-1A	Homo sapiens	High	2	66.8	60.9	80.1	64.6	63.7	57.6	72.8	56.9	73.6	67.8
Q8WW43	APH1B	Gamma-secretase subunit APH-1B	Homo sapiens	High	1	70.4	78	94.9	76.6	63.2	98.4	65.5	67.9	70	67.7
Q9BZZ5	API5	Apoptosis inhibitor 5	Homo sapiens	High	34	6887.4	6617.6	6128.2	6617.4	6190.4	6759.4	6448.7	6843.1	6781.6	6363.7
Q96GX9	APIP	Methylthioribulose-1-phosphate dehydratase	Homo sapiens	High	9	1157.9	1187.4	1441.7	1234	1133	1215.5	1213.1	1068	1265.6	1378.9
Q8N2Z9	APITD1	Centromere protein S	Homo sapiens	High	7	515.8	532.7	559.9	544	563.6	612.3	536.3	507	545.2	514.7
Q06481	APLP2	Amyloid-like protein 2	Homo sapiens	High	7	333.3	330.8	348.9	358	314.1	384.9	331.6	340.1	346.9	356.3
Q9HDC9	APMAP	Adipocyte plasma membrane-associated protein	Homo sapiens	High	17	3560.1	3563	3743	3677.8	3841.3	3563.3	3857.1	3685	3555.8	3569.7
P02647	APOA1	Apolipoprotein A-I	Homo sapiens	High	2	25.2	26.9	43.8	29.4	39	31.4	39.9	26.3	30	30.1
P04114	APOB	Apolipoprotein B-100	Homo sapiens	High	9	1567.7	1583.9	1134.7	1494.3	1330.7	1449.7	1262	1640.2	1417.4	1137.9
Q9UH17	APOBEC3B	DNA dC->dU-editing enzyme APOBEC-3B	Homo sapiens	High	5	449.7	496.4	517	519.4	336	412.4	412.1	427	466.2	383.8
Q9NRW3	APOBEC3C	DNA dC->dU-editing enzyme APOBEC-3C	Homo sapiens	High	7	1322.3	1310	1259.8	1350.1	140.4	105.8	102.7	119.3	314.2	133.8
Q96AK3	APOBEC3D	DNA dC->dU-editing enzyme APOBEC-3D	Homo sapiens	High	1	108.2	109	129.1	103.2	35.5	34	29.4	40.4	59.5	40.5
Q8IUX4	APOBEC3F	DNA dC->dU-editing enzyme APOBEC-3F	Homo sapiens	High	1	120.3	127.1	146.5	119.8	23.9	23.1	22.8	16.9	88.1	21.1
Q9HC16	APOBEC3G	DNA dC->dU-editing enzyme APOBEC-3G	Homo sapiens	High	2	355.1	419	428.6	406.2	66.5	73.4	65.9	91.4	135.5	347.5
P02656	APOC3	Apolipoprotein C-III	Homo sapiens	High	1	85.3	112.5	148.3	97.4	121.3	101.7	114.6	104.6	89.2	101.6
P02649	APOE	Apolipoprotein E	Homo sapiens	High	3	202.9	200.1	229.4	219.2	255.9	193.6	260.3	201.9	221.6	216.1
Q9BQE5	APOL2	Apolipoprotein L2	Homo sapiens	High	14	1481	1727.4	1683	1821.5	1696.4	1892.3	1765.8	1788.5	1589.3	1731.3
O95236	APOL3	Apolipoprotein L3	Homo sapiens	High	6	429.6	525.7	546.3	591.8	440	507.3	500.6	449.3	562.7	534.2
Q9BWW8	APOL6	Apolipoprotein L6	Homo sapiens	High	2	47.4	50.8	51.1	57.1	52.5	49.9	47.3	57.5	53	51.3
Q9BUR5	APOO	MICOS complex subunit MIC26	Homo sapiens	High	5	828.5	840.6	888.8	814.2	863	829	827.6	788.2	862.6	856.7
Q6UXV4	APOOL	MICOS complex subunit MIC27	Homo sapiens	High	14	1766.9	1795.4	1543.1	1769.3	1851.5	1856.6	1657.2	1790.3	1701.7	1667.6
Q96IL0	APOPT1	Apoptogenic protein 1, mitochondrial	Homo sapiens	High	2	151.2	154	183.8	155	143.2	168.2	160.4	124.2	150.4	164
Q92624	APPBP2	Amyloid protein-binding protein 2	Homo sapiens	High	7	419.7	415.8	446.6	408.8	435.8	416.5	443.8	437	451.3	492.6
Q9UKG1	APPL1	DCC-interacting protein 13-alpha	Homo sapiens	High	25	1665.5	1753.8	1885.6	1679.2	1640.8	1614.4	1897.6	1726.7	1701.1	1800.3
Q8NEU8	APPL2	DCC-interacting protein 13-beta	Homo sapiens	High	8	291.9	298.1	304	291.1	250.8	279.8	301.3	270.9	297.4	296.7
P07741	APRT	Adenine phosphoribosyltransferase	Homo sapiens	High	12	1482.9	1306.3	1598.6	1273.2	1500.4	1321.5	1468.6	1307.5	1448.7	1590
Q7Z2E3	APTX	Aprataxin	Homo sapiens	High	13	989.7	952.8	1242.5	961.6	1039.9	1024.8	1158.9	947.5	1027.1	1118.9
Q92482	AQP3	Aquaporin-3	Homo sapiens	High	1	66.2	59.9	71.6	54.6	60.6	41.4	60.7	62.5	84.2	81.4
O60306	AQR	Intron-binding protein aquarius	Homo sapiens	High	57	7857.6	7582.3	6866.3	7708.9	8120.5	7989.4	7080.5	7750.7	8083.6	7450.8
P10398	ARAF	Serine/threonine-protein kinase A-Raf	Homo sapiens	High	10	519.3	504.3	587.1	517.6	501.7	512.8	561.4	485.5	532.1	551
Q96P48	ARAP1	Arf-GAP with Rho-GAP domain, ANK repeat and PH domain-containing protein 1	Homo sapiens	High	42	3976.4	3999.2	3611.3	4077.1	3788	4063.5	3755.4	4150.3	3803	3687.5
P48444	ARCN1	Coatomer subunit delta	Homo sapiens	High	37	12620.2	11951.1	11583.7	11829.8	12954.1	11740.3	12145.2	12744.1	12325.7	12393.1
O15033	AREL1	Apoptosis-resistant E3 ubiquitin protein ligase 1	Homo sapiens	High	4	145.2	194.8	147.2	196.1	163.5	210.1	161.9	200.9	178.1	163.6
P61204	ARF3	ADP-ribosylation factor 3	Homo sapiens	High	1	3025.9	3367.8	3770.1	3251.6	3127.1	3284.6	3507	3216.3	3141.5	3186
P18085	ARF4	ADP-ribosylation factor 4	Homo sapiens	High	5	2305.3	2264.2	2387.2	2193.5	2499.7	2401.5	2368.7	2323.4	2340.7	2307.8
P84085	ARF5	ADP-ribosylation factor 5	Homo sapiens	High	7	4486.5	4682.8	4621.6	4777.3	4558	4635.9	4922	4618.4	4686	4361.3
P62330	ARF6	ADP-ribosylation factor 6	Homo sapiens	High	7	1865.2	1825.4	1636	1756.3	1849.7	1585.2	1988.2	1737.2	1736.6	1721.9
Q8N6T3	ARFGAP1	ADP-ribosylation factor GTPase-activating protein 1	Homo sapiens	High	22	2189.1	2358.5	2124.7	2349.8	2203.2	2385.3	2387	2438.1	2110.2	2038.6
Q8N6H7	ARFGAP2	ADP-ribosylation factor GTPase-activating protein 2	Homo sapiens	High	24	2428.7	2237.7	2379.5	2254.5	2270.4	2246.5	2439.5	2360.3	2293.5	2296.7
Q9NP61	ARFGAP3	ADP-ribosylation factor GTPase-activating protein 3	Homo sapiens	High	30	3854.3	3474.5	3284.7	3383.7	3452.4	3362.5	3461.8	3584.8	3554.4	3270.3
Q9Y6D6	ARFGEF1	Brefeldin A-inhibited guanine nucleotide-exchange protein 1	Homo sapiens	High	40	6580.9	6349	6478.1	6443	6444	6779.1	6372.7	6135.3	6688.4	6566.5
Q9Y6D5	ARFGEF2	Brefeldin A-inhibited guanine nucleotide-exchange protein 2	Homo sapiens	High	37	4378	4677	4623.2	4646.8	4255.1	4944.6	4463.9	4509.5	4335.5	4462.2
P53367-2	ARFIP1	Isoform A of Arfaptin-1	Homo sapiens	Medium	4	24.9	22.2	36.9	24.3	24.8	17.6	30.1	15.1	33.5	33.7
P53367	ARFIP1	Arfaptin-1	Homo sapiens	High	14	2543.3	2445.7	2731.2	2564.9	2517.2	2576.8	2465.5	2305.5	2532.6	2630.9
P53365	ARFIP2	Arfaptin-2	Homo sapiens	High	12	1190.1	1141.1	1045.7	1184.2	1225.3	1241.8	1096.8	1171.7	1204.4	1208.3
Q13795	ARFRP1	ADP-ribosylation factor-related protein 1	Homo sapiens	High	11	1025.2	1012.8	1178.9	1039.5	1073.9	1005.8	1207	1026.4	1033.1	1096.4
P05089	ARG1	Arginase-1	Homo sapiens	High	4	180.7	186.2	138.8	226.7	144.3	266.7	213.2	176.6	192.7	161.1
P78540	ARG2	Arginase-2, mitochondrial	Homo sapiens	High	7	333.6	375.1	364.1	373.6	362.9	349.6	367.6	343.8	285.5	396.8
Q9NWB6	ARGLU1	Arginine and glutamate-rich protein 1	Homo sapiens	High	13	1843.7	2071	2217.7	2007.2	1977.6	2057.6	1793.9	2070.3	1883.9	2030.4
Q07960	ARHGAP1	Rho GTPase-activating protein 1	Homo sapiens	High	19	2843.8	2716.8	2667.2	2647	2612.7	2749.1	2706.6	2738.5	2788.6	2656.6
Q6P4F7	ARHGAP11A	Rho GTPase-activating protein 11A	Homo sapiens	High	16	1014	981.8	1111.1	999.4	1420.3	1059.8	1160.2	1005.8	1053.4	1117.6
Q8IWW6	ARHGAP12	Rho GTPase-activating protein 12	Homo sapiens	High	21	1347.4	1365.3	1455.2	1353.2	1407.9	1462.7	1330.1	1336	1366.5	1411.2
Q53QZ3	ARHGAP15	Rho GTPase-activating protein 15	Homo sapiens	High	22	6981.8	6511.2	5801.7	6440.4	6052	6046.1	6494.8	6745	6569.6	6130
Q68EM7	ARHGAP17	Rho GTPase-activating protein 17	Homo sapiens	High	20	1700.2	1701.9	1778.6	1683.8	1725.9	1727.4	1674.8	1739.8	1702.3	1744.8
Q14CB8	ARHGAP19	Rho GTPase-activating protein 19	Homo sapiens	High	18	2006.3	2160.3	2020.6	2213.6	2702.1	2364.8	2096.3	2183.5	2053.8	2040.8
Q5T5U3	ARHGAP21	Rho GTPase-activating protein 21	Homo sapiens	High	19	766.4	715.8	790.1	729.7	755.1	743.3	780.4	722.5	782	842.6
Q9P227	ARHGAP23	Rho GTPase-activating protein 23	Homo sapiens	High	2	853.2	786.9	457.4	810.5	610	679.9	557.3	854	850.8	567.9
P42331	ARHGAP25	Rho GTPase-activating protein 25	Homo sapiens	High	3	120.5	138.9	118.3	119.1	123	122.1	116.5	132.7	126.1	114.8
Q9UNA1	ARHGAP26	Rho GTPase-activating protein 26	Homo sapiens	High	8	316.3	331	420.7	314.3	324.9	326.1	381.4	306.8	364.1	417
Q6ZUM4	ARHGAP27	Rho GTPase-activating protein 27	Homo sapiens	High	9	589.2	536.8	522.8	546.7	492.5	553.6	534.6	577.7	595.3	562.2
Q7Z6I6	ARHGAP30	Rho GTPase-activating protein 30	Homo sapiens	High	30	2851.8	2883.9	2792	2714.3	2681.7	2693.2	2672.2	2773	2787.6	2701.4
Q9NRY4	ARHGAP35	Rho GTPase-activating protein 35	Homo sapiens	High	49	4660.3	4735.7	4734.3	4664.4	4703.2	4705.1	4637.8	4713.7	4676.7	4861.9
P98171	ARHGAP4	Rho GTPase-activating protein 4	Homo sapiens	High	37	3938.3	4549.7	4811.2	4288.6	3764.3	4293.2	4482.9	4256.4	3922.8	4233.5
Q13017	ARHGAP5	Rho GTPase-activating protein 5	Homo sapiens	High	44	4573.2	4340.3	4211.6	4394.6	4526.1	4512.2	4438.5	4545.7	4494.1	4443.3
Q9BRR9	ARHGAP9	Rho GTPase-activating protein 9	Homo sapiens	High	12	975.4	1118.9	1046.4	1076.5	1018	1155.7	1030.7	1124.6	986.5	963.9
P52565	ARHGDIA	Rho GDP-dissociation inhibitor 1	Homo sapiens	High	23	5761.1	5942.1	6258.3	6039.4	6023.5	5720.2	6030.6	5645.2	5911.4	6177.7
P52566	ARHGDIB	Rho GDP-dissociation inhibitor 2	Homo sapiens	High	20	11968.8	12263.7	10747.4	12141.3	11331.5	10595.8	11278.3	11587.4	12958.6	11844.4
Q92888	ARHGEF1	Rho guanine nucleotide exchange factor 1	Homo sapiens	High	33	3781	3744.9	4261.2	3646.2	3557.1	3743.7	3864.7	3617.5	3731.9	3859.6
M0QZR4	ARHGEF1	Rho guanine nucleotide exchange factor 1	Homo sapiens	High	7	73.9	64.7	59.8	72.5	66.5	67.7	49.9	59	72.8	42.2
Q6ZSZ5	ARHGEF18	Rho guanine nucleotide exchange factor 18	Homo sapiens	High	34	3702	3725.2	3638.4	3778.4	3390.6	3856	3720.1	3822.1	3757.2	3715.4
Q92974	ARHGEF2	Rho guanine nucleotide exchange factor 2	Homo sapiens	High	44	5165.5	5201.2	5315.8	5236.9	4955.1	5441.4	5105.3	5441.3	5378.8	5173.5
Q96DR7	ARHGEF26	Rho guanine nucleotide exchange factor 26	Homo sapiens	High	14	1013.7	915.4	1080.6	952.9	1155.7	1014.7	1063.8	948.4	1125.3	1211.9
Q8N4T4	ARHGEF39	Rho guanine nucleotide exchange factor 39	Homo sapiens	High	2	24.1	20	26.6	18.6	31	21.9	31.8	15.2	23.8	26.1
Q15052	ARHGEF6	Rho guanine nucleotide exchange factor 6	Homo sapiens	High	29	5477.7	5600.9	5355.1	5582.4	4357.7	5722.6	5339.1	5368.3	5238.2	5367.8
Q14155-5	ARHGEF7	Isoform 5 of Rho guanine nucleotide exchange factor 7	Homo sapiens	High	6	671.1	686.9	574.8	629.6	521.7	681.8	588	659	633.1	656.3
Q14155	ARHGEF7	Rho guanine nucleotide exchange factor 7	Homo sapiens	High	20	2229.9	1995.4	1994.8	2010.7	1787	1953.7	1952.6	2195.4	2096.4	2104.9
O43307	ARHGEF9	Rho guanine nucleotide exchange factor 9	Homo sapiens	High	1	65.5	86.2	115.8	86.4	67.1	91.2	92.7	79.9	75.7	87.1
O14497	ARID1A	AT-rich interactive domain-containing protein 1A	Homo sapiens	High	59	7367.7	7352.5	8167.2	7167.4	7367.2	7120.5	7676.1	7208.5	7326.3	7958.6
Q8NFD5	ARID1B	AT-rich interactive domain-containing protein 1B	Homo sapiens	High	33	2156.9	2152.6	2049.6	2217.6	2174.4	2310.3	2044.5	2223.2	2210.8	2046.4
Q68CP9	ARID2	AT-rich interactive domain-containing protein 2	Homo sapiens	High	42	5833.1	5559.9	5949.3	5662.6	5678.6	5741.1	5792.3	5635.6	5968.2	5864.1
Q99856	ARID3A	AT-rich interactive domain-containing protein 3A	Homo sapiens	High	10	688.2	736.8	761.7	750.8	633.2	785.4	716	725.7	746.7	764.6
Q8IVW6	ARID3B	AT-rich interactive domain-containing protein 3B	Homo sapiens	High	20	3361.4	3160	2776	3052.5	2805.3	3222.5	2930.6	3210.2	3134.2	2971.5
P29374	ARID4A	AT-rich interactive domain-containing protein 4A	Homo sapiens	High	35	3186.8	3187	3253.9	3369	2846.7	3400.2	2828.9	3356.9	3256.6	2975.3
Q4LE39	ARID4B	AT-rich interactive domain-containing protein 4B	Homo sapiens	High	30	3683	3755.9	3897.9	3640	3740.7	3757.6	3808.5	3575.3	3743.6	3953.3
Q14865	ARID5B	AT-rich interactive domain-containing protein 5B	Homo sapiens	High	32	2292.1	2286.5	2075.6	2266.2	2422.2	2525.6	2317.8	2548.4	2456.2	2459.6
Q9Y4X5	ARIH1	E3 ubiquitin-protein ligase ARIH1	Homo sapiens	High	19	3312.2	2768.1	2388.5	2990.3	3361.8	2896.8	2827.4	3047.6	3195.9	3022.1
O95376	ARIH2	E3 ubiquitin-protein ligase ARIH2	Homo sapiens	High	20	1512.1	1671.1	1922.6	1708.2	1544.1	1818	1710.8	1614.4	1527.6	1737.4
P40616	ARL1	ADP-ribosylation factor-like protein 1	Homo sapiens	High	10	1650.2	1680.9	1722.9	1748.1	1720.3	1871.8	1650.6	1703.9	1718.2	1687
Q3SXY8	ARL13B	ADP-ribosylation factor-like protein 13B	Homo sapiens	High	10	1024.5	996	1328.9	957.3	995.5	957.2	1186.3	947.1	1084.7	1288.3
Q8N8R7	ARL14EP	ARL14 effector protein	Homo sapiens	High	9	657	652.4	783.3	690.7	734.9	682.7	786.1	686.4	682.5	757.9
Q9NXU5	ARL15	ADP-ribosylation factor-like protein 15	Homo sapiens	High	5	410.8	363.9	454.9	384.1	458.9	369.8	445.8	377.4	448.6	475.6
P36404	ARL2	ADP-ribosylation factor-like protein 2	Homo sapiens	High	8	1931.5	1720.6	1463.2	1745.7	1805.9	1755.7	1689.3	1862.8	1803.6	1585.1
Q9Y2Y0	ARL2BP	ADP-ribosylation factor-like protein 2-binding protein	Homo sapiens	High	4	552.5	523.9	394.1	478.1	508.1	505.8	427.8	522.3	552.3	457.9
P36405	ARL3	ADP-ribosylation factor-like protein 3	Homo sapiens	High	12	986.1	958.9	880.1	979.6	960.4	989.3	919.3	1022.3	921.8	879.1
P56559	ARL4C	ADP-ribosylation factor-like protein 4C	Homo sapiens	High	6	474.2	502.8	566	486.4	394.1	480.2	550.4	483	464	543.9
Q9Y689	ARL5A	ADP-ribosylation factor-like protein 5A	Homo sapiens	High	2	260.3	243.7	300.8	235.8	281.1	240.8	319.5	243.7	288.3	303
Q96KC2	ARL5B	ADP-ribosylation factor-like protein 5B	Homo sapiens	High	3	300.2	337.4	268.4	338.1	273.9	377.1	270.2	315.7	286.4	293.4
Q9H0F7	ARL6	ADP-ribosylation factor-like protein 6	Homo sapiens	High	9	646.6	670	685	656.6	690.8	703.2	692	667.1	695.6	668.5
Q15041	ARL6IP1	ADP-ribosylation factor-like protein 6-interacting protein 1	Homo sapiens	High	2	491.7	325.5	314	345.9	601.6	345.5	459.1	401.6	523	469.2
Q66PJ3	ARL6IP4	ADP-ribosylation factor-like protein 6-interacting protein 4	Homo sapiens	High	6	465.6	536.5	541	499.5	409.5	571.5	477	499	479.5	520.5
O75915	ARL6IP5	PRA1 family protein 3	Homo sapiens	High	5	1081.7	1232.9	1514.5	1258.4	1215.5	1273.3	1370.4	1153.2	1124.8	1240.7
Q8N6S5	ARL6IP6	ADP-ribosylation factor-like protein 6-interacting protein 6	Homo sapiens	High	4	522.7	570.7	688.1	521.4	455	590.4	591.2	456.3	529	551.5
Q96BM9	ARL8A	ADP-ribosylation factor-like protein 8A	Homo sapiens	High	2	231.6	237.8	252.4	242.5	236.7	239.6	251.5	237.2	239.6	259.1
Q9NVJ2	ARL8B	ADP-ribosylation factor-like protein 8B	Homo sapiens	High	5	1315.8	1313.7	1310.8	1349.8	1382.3	1425.3	1338.2	1383.6	1416.4	1251.5
Q9NVT9	ARMC1	Armadillo repeat-containing protein 1	Homo sapiens	High	8	945	936	984.1	888.5	1022.9	1007.8	965.4	960.3	976.4	946
Q8N2F6-2	ARMC10	Isoform 2 of Armadillo repeat-containing protein 10	Homo sapiens	Medium	2	35.6	53	39.6	22.1	26	42.9	40	39.1	33.3	33.8
Q8N2F6	ARMC10	Armadillo repeat-containing protein 10	Homo sapiens	High	11	1503	1748.7	1406.9	1570.4	1430.3	1681.6	1461.6	1601.7	1374	1409.6
Q96C12	ARMC5	Armadillo repeat-containing protein 5	Homo sapiens	High	3	189.4	263	235.6	247.2	187.6	294.5	182.2	203.5	180.2	186.5
Q6NXE6	ARMC6	Armadillo repeat-containing protein 6	Homo sapiens	High	22	3724.8	3776.4	3864.4	3845.6	4088.5	3883.7	3832	3788.9	3734.4	3952
Q9H6L4	ARMC7	Armadillo repeat-containing protein 7	Homo sapiens	High	3	52.4	59.9	66.9	59	56.4	73.3	70	53.4	55.4	67.4
Q8IUR7	ARMC8	Armadillo repeat-containing protein 8	Homo sapiens	High	28	3540	3637.1	3792.1	3634.4	3677.4	3745.3	3826.2	3702.5	3548.1	3626.8
Q9UH62	ARMCX3	Armadillo repeat-containing X-linked protein 3	Homo sapiens	High	13	1091.5	1012.1	977.1	1021.8	1127.8	1149.6	1029.3	1044.4	1061.9	1030.6
Q6P1M9	ARMCX5	Armadillo repeat-containing X-linked protein 5	Homo sapiens	High	10	874.3	856.1	780.1	856.5	725.2	922.8	773.3	933.8	936.5	891.7
Q9H993	ARMT1	Protein-glutamate O-methyltransferase	Homo sapiens	High	17	3295	3502.1	2506	3452.1	3225	3616.1	2762.2	3786.6	3101.2	2835.1
P27540	ARNT	Aryl hydrocarbon receptor nuclear translocator	Homo sapiens	High	14	473.5	488.4	604.5	492.5	417.6	510.4	549.9	468.6	465	540
Q92747	ARPC1A	Actin-related protein 2/3 complex subunit 1A	Homo sapiens	High	14	2099.8	1982.7	1602.8	1998.6	2100.6	2015	1860.3	2103.1	1950	1756.8
O15143	ARPC1B	Actin-related protein 2/3 complex subunit 1B	Homo sapiens	High	18	2708.7	2839.6	2821.5	2761	2661	2881.4	2880.6	2863.6	2595.1	2616.6
O15144	ARPC2	Actin-related protein 2/3 complex subunit 2	Homo sapiens	High	21	5243.9	5360.7	5263.2	5246.6	5180.5	5502.5	5226	5178.3	5127.9	4942.1
O15145	ARPC3	Actin-related protein 2/3 complex subunit 3	Homo sapiens	High	6	1749.7	1846.3	1675.3	1897.6	1844.3	1809.3	1891.2	1920.1	1587.8	1806.2
P59998	ARPC4	Actin-related protein 2/3 complex subunit 4	Homo sapiens	High	12	2219.7	2474.7	2275.7	2361.9	2279.8	2460.5	2326.3	2428.4	2214.1	2048.7
O15511	ARPC5	Actin-related protein 2/3 complex subunit 5	Homo sapiens	High	13	3212.8	2946.4	3098.8	3007.4	3179.9	2969.2	3077.7	2940.2	3137.4	3272.9
Q9BPX5	ARPC5L	Actin-related protein 2/3 complex subunit 5-like protein	Homo sapiens	High	9	845.7	794.1	744.6	825	844.2	861	773	855.7	771.7	802.2
P56211	ARPP19	cAMP-regulated phosphoprotein 19	Homo sapiens	High	6	2436.1	2452.9	1772.3	2391.6	1847.1	2305.4	1924.6	2532.6	2134.3	1793.7
Q9UBL0	ARPP21	cAMP-regulated phosphoprotein 21	Homo sapiens	High	7	1042.7	945.7	828.7	979.9	894.1	914.7	955.9	1075.4	1001.2	916.1
P32121	ARRB2	Beta-arrestin-2	Homo sapiens	High	21	2424.3	2654.6	2649	2644.1	2509.5	2740.4	2661.8	2649.8	2378.8	2457.1
Q8N5I2	ARRDC1	Arrestin domain-containing protein 1	Homo sapiens	High	7	417.4	442.4	387	453.8	397.4	451.4	407	416.1	392.3	395
P15289	ARSA	Arylsulfatase A	Homo sapiens	High	4	229	228.3	241.4	259.7	246.5	278.6	224.5	249.2	263.3	244.6
P15848	ARSB	Arylsulfatase B	Homo sapiens	High	4	155.1	161.5	125.3	157.6	152.2	174.5	130.7	166.3	160.7	143.4
Q6UWY0	ARSK	Arylsulfatase K	Homo sapiens	High	6	714.8	668.8	603	727.1	604	686.1	620.9	668.9	711.9	667
Q9H2C2	ARV1	Protein ARV1	Homo sapiens	High	2	52.9	44.4	56	41.7	49.3	53.2	50.5	50.1	47.8	50.9
Q9HBK9	AS3MT	Arsenite methyltransferase	Homo sapiens	High	24	3396.4	3760.9	3647.6	3609.8	3112.4	3636.1	3745.2	3691.4	3284.9	3564
Q13510	ASAH1	Acid ceramidase	Homo sapiens	High	9	812.7	784.3	886.7	837.8	971.5	878	885.5	856.4	938.1	961.1
Q9ULH1	ASAP1	Arf-GAP with SH3 domain, ANK repeat and PH domain-containing protein 1	Homo sapiens	High	29	2621.1	2675.2	2690.9	2814.7	2564.8	2688.9	2711.7	2631.4	2774.8	2836
O43150	ASAP2	Arf-GAP with SH3 domain, ANK repeat and PH domain-containing protein 2	Homo sapiens	High	3	171.8	163.1	122.7	169.5	180	193.8	132.6	173.5	220.3	170.5
Q9Y576	ASB1	Ankyrin repeat and SOCS box protein 1	Homo sapiens	High	1	241.8	249.2	214.8	240.7	251.3	232.3	275.9	250.3	239.8	230
Q8WXK3	ASB13	Ankyrin repeat and SOCS box protein 13	Homo sapiens	High	3	126.6	126	110.1	132.6	137.6	122.6	110	133.5	153.3	124.2
Q9Y575	ASB3	Ankyrin repeat and SOCS box protein 3	Homo sapiens	High	4	254.1	258.2	261.5	268.4	272.8	249.2	273.1	259.5	299	266.9
Q9NWX5	ASB6	Ankyrin repeat and SOCS box protein 6	Homo sapiens	High	9	722.8	702.3	658.8	728.9	795	762.3	739	760.1	722	751
Q9H672	ASB7	Ankyrin repeat and SOCS box protein 7	Homo sapiens	High	1	19.7	31.7	21	29.1	15.7	23.3	22.7	22.1	15.8	15.1
Q9H765	ASB8	Ankyrin repeat and SOCS box protein 8	Homo sapiens	High	3	142.1	136	134.9	146.6	133.6	194.8	132.5	163.6	152	120.6
Q96DX5	ASB9	Ankyrin repeat and SOCS box protein 9	Homo sapiens	High	3	203.7	167.3	161.1	156.5	212.5	151.4	182.4	182.6	204.4	167.6
Q8N9N2	ASCC1	Activating signal cointegrator 1 complex subunit 1	Homo sapiens	High	5	386.5	389.1	413.9	402.1	400.4	427.4	427	364	389.6	415.6
Q8N9N2-2	ASCC1	Isoform 2 of Activating signal cointegrator 1 complex subunit 1	Homo sapiens	Medium	2	53.8	50.3	37.7	42.7	46.4	38.4	48.9	46.1	48.1	40
Q9H1I8	ASCC2	Activating signal cointegrator 1 complex subunit 2	Homo sapiens	High	15	2884.6	2716	2828.1	2845.8	2960.5	2886.3	2811	2899.7	2911.3	2901.7
Q8N3C0	ASCC3	Activating signal cointegrator 1 complex subunit 3	Homo sapiens	High	70	10109.3	10177.9	9717.5	10321	10018.5	10390.9	9950.5	10273	10195.1	9812.5
Q9Y294	ASF1A	Histone chaperone ASF1A	Homo sapiens	High	7	1027.9	1294.1	1255.5	1227.7	951.6	1270.4	1279.3	1239.1	972.3	1116.2
Q9NVP2	ASF1B	Histone chaperone ASF1B	Homo sapiens	High	7	387.7	307.2	407.9	291.8	302.5	305.6	414.4	367.7	349.3	356.7
Q9NR48	ASH1L	Histone-lysine N-methyltransferase ASH1L	Homo sapiens	High	1	30.7	37.9	32.7	36.3	29.2	35.8	40.2	29.4	32.7	33.2
Q9UBL3	ASH2L	Set1/Ash2 histone methyltransferase complex subunit ASH2	Homo sapiens	High	26	4560.3	4208.8	4218.1	4178	4274.1	4223.5	4279.6	4248.6	4411.6	4445.8
P04424	ASL	Argininosuccinate lyase	Homo sapiens	High	7	371.6	406.2	440.2	403.6	349.9	441.8	417.7	380.7	414.2	414.4
O95671	ASMTL	N-acetylserotonin O-methyltransferase-like protein	Homo sapiens	High	12	970	977.9	1064.9	911.5	963.7	992.2	1024.9	900.6	986.6	1052
O43681	ASNA1	ATPase ASNA1	Homo sapiens	High	18	3056.6	2567.4	2050.3	2550.9	2989.4	2504.8	2379	2817.5	2753.7	2447.5
P08243	ASNS	Asparagine synthetase [glutamine-hydrolyzing]	Homo sapiens	High	30	9053.5	9981.1	9139.1	9919.4	9234.8	10684.4	9105.5	9718.3	8932.4	9189.4
Q9NWL6	ASNSD1	Asparagine synthetase domain-containing protein 1	Homo sapiens	High	11	777.7	782.2	862.3	813.7	806.5	818.7	816.8	784.4	805.4	838.1
L0R819	ASNSD1	Alternative protein ASNSD1	Homo sapiens	High	5	608.5	557.3	710.8	522.6	509.1	554.3	561	437.8	510	604.5
Q12797	ASPH	Aspartyl/asparaginyl beta-hydroxylase	Homo sapiens	High	15	2251.4	2275.9	2186.1	2229.1	2400.6	2412.3	2220.9	2290.6	2383.4	2449.5
Q8IZT6	ASPM	Abnormal spindle-like microcephaly-associated protein	Homo sapiens	High	36	2517	2433.1	3180.8	2577.5	4719.8	2866.7	2889.1	2663.1	2637.8	2900.2
Q9BZE9	ASPSCR1	Tether containing UBX domain for GLUT4	Homo sapiens	High	17	2057.1	1953.3	2198.4	1934.1	2082.3	1954.8	2008.2	1988.8	2102.5	2149.4
Q7L266	ASRGL1	Isoaspartyl peptidase/L-asparaginase	Homo sapiens	High	10	1201.1	1134.6	1332.3	1233.5	1270.8	1210	1255	1176	1287.1	1379.1
P00966	ASS1	Argininosuccinate synthase	Homo sapiens	High	24	4301.8	3793.3	3793.2	3929.4	4464.1	4023.4	4003.3	4026.7	4152.1	4430.3
Q2TB18	ASTE1	Protein asteroid homolog 1	Homo sapiens	High	10	639.9	715.2	692.8	689.4	693.3	680.9	703.7	668.6	706.6	696.5
Q9NVM9	ASUN	Protein asunder homolog	Homo sapiens	High	32	4315.9	4189.6	4718.7	4135.8	4053.4	4157.7	4333.5	4052.8	4303.3	4495.5
Q8IXJ9	ASXL1	Putative Polycomb group protein ASXL1	Homo sapiens	High	7	171.2	157.5	220.5	171.1	186.8	170.4	219.5	155.9	193.3	231.1
Q76L83	ASXL2	Putative Polycomb group protein ASXL2	Homo sapiens	High	13	908.4	858	993.5	898	919.8	913.5	977.5	893.7	943.2	1002.4
Q8NBU5	ATAD1	ATPase family AAA domain-containing protein 1	Homo sapiens	High	13	2182.2	2333.5	2525.5	2325.2	2414	2480.8	2391.1	2303.7	2183.3	2397.7
Q6PL18	ATAD2	ATPase family AAA domain-containing protein 2	Homo sapiens	High	52	8721.9	8057.6	8024.4	8287.5	5477	7935.5	7874.3	8464	8533.9	8122.8
Q9ULI0	ATAD2B	ATPase family AAA domain-containing protein 2B	Homo sapiens	High	35	3285.6	3641	3182.2	3664.4	3028	3509.7	3195.8	3559.3	3403.8	3305
Q9NVI7	ATAD3A	ATPase family AAA domain-containing protein 3A	Homo sapiens	High	11	5699	5685	5581.4	5571.2	5892.1	5654.1	5612.4	5701.4	5740.5	5285.9
Q5T9A4	ATAD3B	ATPase family AAA domain-containing protein 3B	Homo sapiens	High	8	670.2	706.5	805.9	669.3	777	702.5	701	658.2	776.3	848.1
Q96QE3	ATAD5	ATPase family AAA domain-containing protein 5	Homo sapiens	High	28	881.6	869.4	958.7	888.5	798.2	902.9	961.4	901.4	912.8	976
Q5SQI0	ATAT1	Alpha-tubulin N-acetyltransferase 1	Homo sapiens	High	5	334.7	345.3	322.5	322.8	329.2	372.5	300.9	349.4	318.9	282
F5GXE4	ATE1	Arginyl-tRNA--protein transferase 1	Homo sapiens	Medium	3	278.5	277.7	318.4	286	285.2	297.3	296.6	258	273.5	308.1
O95260	ATE1	Arginyl-tRNA--protein transferase 1	Homo sapiens	High	18	2672	2649	2462.3	2596.9	2578.5	2719.9	2473.7	2618.4	2654.9	2488.8
P18846	ATF1	Cyclic AMP-dependent transcription factor ATF-1	Homo sapiens	High	3	258.2	269.6	253.7	254.7	236.8	234.8	274.9	274	254.6	292
P15336	ATF2	Cyclic AMP-dependent transcription factor ATF-2	Homo sapiens	High	13	2560.3	2306.5	2143.6	2402.4	2422.1	2402.6	2355.1	2454.6	2496.6	2543
P18847	ATF3	Cyclic AMP-dependent transcription factor ATF-3	Homo sapiens	High	3	126.6	132.1	129	160.1	141.3	158.4	132.7	148.5	146.8	146.5
P18850	ATF6	Cyclic AMP-dependent transcription factor ATF-6 alpha	Homo sapiens	High	11	502.2	500.8	577.7	543.9	413.7	531.2	540.3	539.9	525.1	593.8
Q99941	ATF6B	Cyclic AMP-dependent transcription factor ATF-6 beta	Homo sapiens	High	7	197.9	222.2	296.6	240.2	201.7	235.6	233.7	234.8	225.2	251.5
P17544	ATF7	Cyclic AMP-dependent transcription factor ATF-7	Homo sapiens	High	7	274	313	367.6	327.6	267.9	328.3	329.9	315.3	288.8	312.1
Q6VMQ6	ATF7IP	Activating transcription factor 7-interacting protein 1	Homo sapiens	High	35	2256.5	2300.8	2468.4	2223.3	2221.6	2351.4	2306.1	2098	2263.2	2323
Q9H0Y0	ATG10	Ubiquitin-like-conjugating enzyme ATG10	Homo sapiens	Medium	1	346.6	285.6	155.9	305	266.4	321.7	240.9	340	351.5	260.2
Q9BSB4	ATG101	Autophagy-related protein 101	Homo sapiens	High	9	500.9	508.9	570.3	512.8	533.3	585.4	546.4	531.3	521.1	532.8
O94817	ATG12	Ubiquitin-like protein ATG12	Homo sapiens	High	6	2269.2	1935.6	1525	2058.5	2128.3	1896.4	1659	2216.5	2273.1	1684.4
O75143	ATG13	Autophagy-related protein 13	Homo sapiens	High	11	909.5	931.5	828.9	900	765	991	830.6	905.4	881.9	911.9
Q676U5	ATG16L1	Autophagy-related protein 16-1	Homo sapiens	High	20	1587.3	1700	1825.3	1752.2	1670.2	1840.4	1808.6	1622.7	1635.3	1712
Q2TAZ0	ATG2A	Autophagy-related protein 2 homolog A	Homo sapiens	High	21	964.7	943.5	961.8	1002.3	893.7	1007.2	989.6	995.9	1001.6	973.5
Q96BY7	ATG2B	Autophagy-related protein 2 homolog B	Homo sapiens	High	22	1917.2	1935.1	1882.5	2054.3	2016.5	2043.8	2018.4	2085.1	1994.6	1883.9
Q9NT62	ATG3	Ubiquitin-like-conjugating enzyme ATG3	Homo sapiens	High	15	1801.3	1521.2	1992.2	1456.9	1862.7	1502.2	1777.7	1499.5	1703.3	1743.6
Q8WYN0	ATG4A	Cysteine protease ATG4A	Homo sapiens	High	4	250	229.8	210.1	249.2	245.9	271.9	240.3	247.9	240.9	225.9
Q9Y4P1	ATG4B	Cysteine protease ATG4B	Homo sapiens	High	13	1103.3	1104.3	1067.8	1105.8	1103	1104.4	1081.2	1149.9	1087.1	1088.1
Q96DT6	ATG4C	Cysteine protease ATG4C	Homo sapiens	High	8	372	350.2	327.3	364.4	362.4	373.5	340.6	367	362.3	370.3
Q86TL0	ATG4D	Cysteine protease ATG4D	Homo sapiens	High	3	49.3	41.7	33	47.8	42.9	51.7	44.1	51.6	42.3	73.9
Q9H1Y0	ATG5	Autophagy protein 5	Homo sapiens	High	10	790.7	835.6	765.1	796.7	798.1	858.5	738.3	826.1	768.6	750.4
O95352	ATG7	Ubiquitin-like modifier-activating enzyme ATG7	Homo sapiens	High	26	3050	3016.6	3240.8	2931.7	3013.3	3157.8	3413.3	2819.4	2976.3	3155.7
Q7Z3C6	ATG9A	Autophagy-related protein 9A	Homo sapiens	High	9	583.7	537.6	751.6	519.3	561.4	548.6	562.7	539.9	587.7	650.8
Q32M88	ATHL1	Acid trehalase-like protein 1	Homo sapiens	High	8	296.7	280.5	237.2	282.5	300.4	268.4	255.4	303.2	291.8	298.1
P31939	ATIC	Bifunctional purine biosynthesis protein PURH	Homo sapiens	High	48	11236.6	11183.3	10102.5	11045.7	11127	10578.4	10565.3	11690.9	10824.9	10820.1
Q8NHH9	ATL2	Atlastin-2	Homo sapiens	High	17	847.3	875.7	1077.5	917.5	1035.4	902.7	1018.5	869.1	938.2	990
Q6DD88	ATL3	Atlastin-3	Homo sapiens	High	24	4472.3	4532.8	3987.9	4539.7	4755.9	4605.6	4363.5	4773.5	4316.8	4126.3
Q13315	ATM	Serine-protein kinase ATM	Homo sapiens	High	23	1142.5	1076	1015.4	1096.9	1034.2	1085.6	1047.2	1091.1	1145.3	1071
O43313	ATMIN	ATM interactor	Homo sapiens	High	2	30.1	37.7	31	35.8	30.1	32.2	32.1	36.8	28.7	41.1
P54259	ATN1	Atrophin-1	Homo sapiens	High	6	355.5	405.9	462.4	422.9	383.5	446.8	421.8	401	375.1	441.1
O00244	ATOX1	Copper transport protein ATOX1	Homo sapiens	High	9	2001.1	1632.1	1884.5	1675.4	2098.7	1623.4	1833.1	1799.7	1850.9	2094.2
Q9Y2G3	ATP11B	Probable phospholipid-transporting ATPase IF	Homo sapiens	High	28	3062.6	3194.4	3441.4	3146.3	2922.4	3331.2	3261.4	2973.3	3100.3	3212.1
Q8NB49	ATP11C	Phospholipid-transporting ATPase IG	Homo sapiens	High	25	1617.7	1759.7	1843.7	1763.1	1645.9	1751.9	1774.6	1658.8	1728.7	1759.2
Q9HD20	ATP13A1	Manganese-transporting ATPase 13A1	Homo sapiens	High	30	2449.5	2466.3	2711.5	2515.6	2621.2	2468.2	2512.8	2442	2675.6	2785.3
Q9NQ11	ATP13A2	Probable cation-transporting ATPase 13A2	Homo sapiens	High	4	177.1	185.9	130.6	165	194.1	219.5	152.9	196.9	185.2	163.3
Q9H7F0	ATP13A3	Probable cation-transporting ATPase 13A3	Homo sapiens	High	18	1026.1	1077.8	1046.7	1034	1093.1	1074.4	1113.6	1066.5	1113.4	1059.9
P05023	ATP1A1	Sodium/potassium-transporting ATPase subunit alpha-1	Homo sapiens	High	35	13492.8	12614.4	11670.4	12628.4	14031.2	11665.8	12598.6	12952.1	12937.4	12562.3
P50993	ATP1A2	Sodium/potassium-transporting ATPase subunit alpha-2	Homo sapiens	High	3	203.5	204.3	188.3	183	219.5	204.5	213.3	191.1	206.4	231.9
P13637	ATP1A3	Sodium/potassium-transporting ATPase subunit alpha-3	Homo sapiens	High	27	3634	3289.2	3437.8	3356.4	4060.1	3238.9	3462.6	3352.3	3686.7	3743.4
P05026	ATP1B1	Sodium/potassium-transporting ATPase subunit beta-1	Homo sapiens	High	1	45.4	46.2	44.4	44.4	35	39.9	49.6	39.1	38.1	45.4
P54709	ATP1B3	Sodium/potassium-transporting ATPase subunit beta-3	Homo sapiens	High	11	1915.4	1836.7	1626.6	1889.1	2043.7	1657.8	1776.4	1923.7	1792.9	1684.5
Q9Y6H3	ATP23	Mitochondrial inner membrane protease ATP23 homolog	Homo sapiens	High	4	161.3	158.7	208	155.3	158.4	167.3	173.5	150.1	171.1	195.2
P16615	ATP2A2	Sarcoplasmic/endoplasmic reticulum calcium ATPase 2	Homo sapiens	High	28	10075.4	10248.6	10936.5	10004.1	10816.7	10643.8	10262.1	10057.1	10511	10634.3
Q93084	ATP2A3	Sarcoplasmic/endoplasmic reticulum calcium ATPase 3	Homo sapiens	High	24	3959	3965	4444.6	3958.6	3446.7	4020.1	3974.1	3753.2	4067	3986.7
P20020	ATP2B1	Plasma membrane calcium-transporting ATPase 1	Homo sapiens	High	16	979.9	1018.7	1239.7	1007.8	1064.1	999.6	1127	1002.4	1071.9	1159.3
P23634	ATP2B4	Plasma membrane calcium-transporting ATPase 4	Homo sapiens	High	28	7166.1	7564.7	7488.3	7273	6657.7	7211	7346.8	6994.9	6886.9	7399.8
P98194	ATP2C1	Calcium-transporting ATPase type 2C member 1	Homo sapiens	High	27	2309.3	2274.6	2458.9	2313.8	2342.2	2327	2432.2	2281.5	2318.7	2542
P20648	ATP4A	Potassium-transporting ATPase alpha chain 1	Homo sapiens	High	1	187.7	120.7	101.4	119.7	195.6	106.8	144.5	149.3	186.8	176.2
P25705	ATP5A1	ATP synthase subunit alpha, mitochondrial	Homo sapiens	High	49	18579.1	19773	22598.9	18962.9	20684	17649.2	21725.7	19129.6	19619.1	20968.6
P06576	ATP5B	ATP synthase subunit beta, mitochondrial	Homo sapiens	High	30	13015.8	13071.3	15118.7	13244.2	14036.7	12445.5	14389.1	12793.4	13236.4	14150.4
P36542	ATP5C1	ATP synthase subunit gamma, mitochondrial	Homo sapiens	High	17	6933.9	8742.3	8496.5	8194.7	7983.1	8559.8	8267.5	8182	7267.2	7833
P30049	ATP5D	ATP synthase subunit delta, mitochondrial	Homo sapiens	High	5	1232.8	1185.3	1478.1	1189.9	1273.6	1195.3	1201.2	1086.2	1229.2	1222.6
P56381	ATP5E	ATP synthase subunit epsilon, mitochondrial	Homo sapiens	High	4	327.2	309.7	365.2	322	356.3	335.8	330.3	310.4	343.1	365
P24539	ATP5F1	ATP synthase F(0) complex subunit B1, mitochondrial	Homo sapiens	High	14	3573.5	3735.2	4090.3	3547.4	3863.1	3498.2	3899.5	3526.6	3542.5	3814.4
O75947	ATP5H	ATP synthase subunit d, mitochondrial	Homo sapiens	High	16	4155.1	3679.5	3684.2	3771.9	4342.1	3586.4	3673	3741.6	4003.5	3897
P56385	ATP5I	ATP synthase subunit e, mitochondrial	Homo sapiens	High	7	1980.2	1885.5	1306.1	1967.2	2069.5	1954.4	1638.6	2212	1734.6	1554.2
P18859	ATP5J	ATP synthase-coupling factor 6, mitochondrial	Homo sapiens	High	6	1262.2	965.6	1367.5	995	1340	978.8	1180.9	1000.5	1309.2	1417.7
P56134	ATP5J2	ATP synthase subunit f, mitochondrial	Homo sapiens	High	4	687.6	713.2	602.8	716.5	731.7	728.8	584.3	782.8	657.2	655.9
O75964	ATP5L	ATP synthase subunit g, mitochondrial	Homo sapiens	High	5	461	372.2	270.3	427.9	485.1	424.3	378.5	452.7	405.3	342.5
P48047	ATP5O	ATP synthase subunit O, mitochondrial	Homo sapiens	High	12	3161.9	2965.9	3117.2	2968.6	3333.7	2886.1	3320.6	3082.3	3081	3095.9
Q99766	ATP5S	ATP synthase subunit s, mitochondrial	Homo sapiens	High	5	211	238.6	249.4	228.7	230.8	238.3	252	242.8	222	236
Q9NW81	ATP5SL	ATP synthase subunit s-like protein	Homo sapiens	High	7	509.2	528	583	560.9	542.4	619.3	620.8	565.3	546.1	564.3
Q15904	ATP6AP1	V-type proton ATPase subunit S1	Homo sapiens	High	10	1199	1110.7	1185	1178.7	1092.1	1162.1	1216.1	1189.2	1172.8	1164.1
O75787	ATP6AP2	Renin receptor	Homo sapiens	High	13	1812.9	1647.9	1727.1	1787.4	1704.8	1931.9	1811	1764.9	1873.6	1804.5
Q93050	ATP6V0A1	V-type proton ATPase 116 kDa subunit a isoform 1	Homo sapiens	High	12	476.8	499.8	527.2	525.7	543.4	630.8	473	484.8	471.3	509.4
Q9Y487	ATP6V0A2	V-type proton ATPase 116 kDa subunit a isoform 2	Homo sapiens	High	16	1751.1	1831.1	1650.6	1828.6	1771.1	1821.7	1645.7	1884.8	1812.3	1741.3
P27449	ATP6V0C	V-type proton ATPase 16 kDa proteolipid subunit	Homo sapiens	High	1	71.3	74.8	74.9	65.6	74.6	90.1	65	78.7	63.3	63.4
P61421	ATP6V0D1	V-type proton ATPase subunit d 1	Homo sapiens	High	8	658.7	788.1	806.5	766	715.1	763.3	799	741.2	684.5	718.5
P38606	ATP6V1A	V-type proton ATPase catalytic subunit A	Homo sapiens	High	31	5241.1	5264.3	6010.9	5141.6	5365.2	5197.1	5243.1	4980.6	5218.3	5229.7
P21281	ATP6V1B2	V-type proton ATPase subunit B, brain isoform	Homo sapiens	High	33	4859.5	4905.5	5657.6	4894.7	5033	4951.9	5442.9	4888.3	4678.5	5476.4
P21283	ATP6V1C1	V-type proton ATPase subunit C 1	Homo sapiens	High	25	5283.8	5554.1	5769.3	5548.4	5401.8	5479.4	5857.9	5586.5	5336.1	5497.5
Q8NEY4	ATP6V1C2	V-type proton ATPase subunit C 2	Homo sapiens	High	1	34.8	52.6	48.1	40	46.9	50.7	56.2	44.6	42.3	46.3
Q9Y5K8	ATP6V1D	V-type proton ATPase subunit D	Homo sapiens	High	12	1392.7	1375.4	1374	1335.6	1341.8	1397.7	1429.9	1412.5	1440.8	1354.1
P36543	ATP6V1E1	V-type proton ATPase subunit E 1	Homo sapiens	High	12	3464.9	3761.6	4203.2	3662.8	3758.7	3616.4	3900.3	3423.8	3459.8	4035.9
Q16864	ATP6V1F	V-type proton ATPase subunit F	Homo sapiens	High	7	834.2	820.1	933.1	848.3	891.9	873.9	892.4	814.8	837	887.3
O75348	ATP6V1G1	V-type proton ATPase subunit G 1	Homo sapiens	High	2	347.9	362.8	523.8	331.5	426.5	330.1	446.8	370.8	409.9	514.4
Q9UI12	ATP6V1H	V-type proton ATPase subunit H	Homo sapiens	High	20	2853.4	3035.1	2742.4	3092.2	2893.7	3209.1	2723.5	3016.3	2793	2718.9
Q04656	ATP7A	Copper-transporting ATPase 1	Homo sapiens	High	19	830.3	913.4	893	864.8	829.4	911.2	863.7	863.9	815.9	870.7
Q9Y2Q0	ATP8A1	Phospholipid-transporting ATPase IA	Homo sapiens	High	11	614.8	635.5	660.2	667.2	639.1	711.5	613.5	627.4	622	662.4
P98198	ATP8B2	Phospholipid-transporting ATPase ID	Homo sapiens	High	1	23.4	22.3	18.8	17.6	21.8	17.8	15.1	19.3	16.8	23.8
O43861	ATP9B	Probable phospholipid-transporting ATPase IIB	Homo sapiens	High	7	212.3	239.6	276.3	240.6	260.1	256.9	239.7	225.7	237.6	253.3
Q5TC12	ATPAF1	ATP synthase mitochondrial F1 complex assembly factor 1	Homo sapiens	High	13	2198.2	2224.3	2289.6	2317.9	2214.6	2286	2241.2	2204.9	2114.6	2188.5
Q8N5M1	ATPAF2	ATP synthase mitochondrial F1 complex assembly factor 2	Homo sapiens	High	5	224.5	232	290.9	213.3	236.1	217.5	252.2	222.1	254.8	258.7
Q9UII2	ATPIF1	ATPase inhibitor, mitochondrial	Homo sapiens	High	11	2539.8	2289.5	2676.5	2449.1	2557.2	2267.6	2433.8	2312.7	2328.3	2511.9
Q13535	ATR	Serine/threonine-protein kinase ATR	Homo sapiens	High	66	6208.1	6175.1	6066.2	6520.7	6258.9	6742.8	6095.1	6304.1	6426.2	6248.4
Q8WXE1	ATRIP	ATR-interacting protein	Homo sapiens	High	13	1183.9	1437.6	1490	1471.4	1276.5	1592.7	1336.9	1445.1	1224.1	1337.2
O75882	ATRN	Attractin	Homo sapiens	High	9	854.8	778.9	720.7	854.5	831.7	912.2	761.3	859.5	873.1	780.9
P46100	ATRX	Transcriptional regulator ATRX	Homo sapiens	High	51	3695.6	3593	3525.6	3633.2	3715	3579.9	3500.5	3917.9	3752.6	3670.7
A0A096LNL9	ATRX	Transcriptional regulator ATRX (Fragment)	Homo sapiens	Medium	4	36.5	36.5	28.4	36.9	42	32	33	37	31.1	40.8
Q9UBB4	ATXN10	Ataxin-10	Homo sapiens	High	26	6418.6	6359.6	5673.8	6389.7	6145.1	6460.6	5828.4	6467.5	6061.3	5844.7
P0C7T5	ATXN1L	Ataxin-1-like	Homo sapiens	High	6	234.9	218	235.5	219.5	300.7	238.3	228	244	229.1	235.3
F8W0B5	ATXN2	Ataxin-2 (Fragment)	Homo sapiens	Medium	3	191.3	220.6	243.6	214	194	216.1	234	200.2	210.1	216.6
Q99700	ATXN2	Ataxin-2	Homo sapiens	High	26	3933	4697.3	4542.8	4521	3984	4414.5	4353.1	4262.2	4375.1	4405
Q8WWM7	ATXN2L	Ataxin-2-like protein	Homo sapiens	High	36	8175.5	7952.4	7649	7908	7892.8	7398	7662.6	8067.8	7595.4	7579.2
P54252	ATXN3	Ataxin-3	Homo sapiens	High	13	1541.2	1574.9	1773.8	1551.5	1432.1	1614.6	1537	1481.6	1539.9	1622.3
O15265	ATXN7	Ataxin-7	Homo sapiens	High	7	447.3	475.4	487.4	435.8	412.9	432.4	471.5	463	443.8	465
Q14CW9	ATXN7L3	Ataxin-7-like protein 3	Homo sapiens	High	7	443.6	430.4	450.4	459.7	483	486.1	451.7	439.1	451	483.1
Q96GX2	ATXN7L3B	Putative ataxin-7-like protein 3B	Homo sapiens	High	2	222.2	337.9	214.5	343.4	230.5	337.6	219.8	320.4	194.9	202.9
Q13825	AUH	Methylglutaconyl-CoA hydratase, mitochondrial	Homo sapiens	High	4	343.8	373	358.8	388	384.6	419.2	354.6	361.5	334.8	360.9
Q9H7T9	AUNIP	Aurora kinase A and ninein-interacting protein	Homo sapiens	High	2	85.6	82.1	136.8	84.6	91.7	106.7	104.2	80.5	86.9	109.8
Q9Y679	AUP1	Ancient ubiquitous protein 1	Homo sapiens	High	12	1511.2	1445.3	1613.7	1535.1	1747.7	1599.8	1657.1	1541.2	1564.1	1663.2
O14965	AURKA	Aurora kinase A	Homo sapiens	High	16	2043.6	2109.9	1838	2303.3	4156.7	2553.7	2051.1	2371	2123.5	2001.6
Q9NWT8	AURKAIP1	Aurora kinase A-interacting protein	Homo sapiens	High	1	72	61.3	104.7	78.1	65.5	78.3	83.4	65.4	52.8	68.2
Q96GD4	AURKB	Aurora kinase B	Homo sapiens	High	15	1911.3	1841.7	1917.4	2067.6	3430.5	2282.2	2092	2133.2	2003.5	1976.1
Q9NQS1	AVEN	Cell death regulator Aven	Homo sapiens	High	9	632.8	766.4	733.2	676.6	701.3	791	686.3	693.9	674.4	752.3
Q8NBF6	AVL9	Late secretory pathway protein AVL9 homolog	Homo sapiens	High	20	2003.4	1949.7	2162.1	1917.9	1945.7	1980.5	2141.5	1866.7	2054	2091.2
O15169	AXIN1	Axin-1	Homo sapiens	High	5	97.6	118.6	144.2	108.6	109.5	132.6	103.1	106.8	114.1	113.7
P25311	AZGP1	Zinc-alpha-2-glycoprotein	Homo sapiens	High	1	36.4	73.1	31.3	56.6	41.2	147.1	74.6	39	49.9	53.3
Q9H6S1	AZI2	5-azacytidine-induced protein 2	Homo sapiens	High	9	264.4	278.8	303.5	267.2	239.7	288	274.5	256.1	235.7	287
Q8NCR0	B3GALNT2	UDP-GalNAc:beta-1,3-N-acetylgalactosaminyltransferase 2	Homo sapiens	High	3	78.9	96.8	98	94.1	92.1	105.5	93.7	96.8	97.2	104.7
Q96L58	B3GALT6	Beta-1,3-galactosyltransferase 6	Homo sapiens	High	5	277.6	314.7	344.1	313.7	284	326.9	286.3	280.4	302.1	309.4
O94766	B3GAT3	Galactosylgalactosylxylosylprotein 3-beta-glucuronosyltransferase 3	Homo sapiens	High	4	452.4	403.2	351.9	425.6	455.1	497.2	439.5	481.4	459.6	463.2
Q6Y288	B3GLCT	Beta-1,3-glucosyltransferase	Homo sapiens	High	4	118.1	103.3	96.2	117.2	114.6	123.8	114.8	114.9	117.8	110.1
Q9NY97	B3GNT2	N-acetyllactosaminide beta-1,3-N-acetylglucosaminyltransferase 2	Homo sapiens	High	13	1214.7	1271.3	1281.6	1279.3	1103.4	1309.2	1310.8	1238.9	1204.5	1250.6
Q7Z7M8	B3GNT8	UDP-GlcNAc:betaGal beta-1,3-N-acetylglucosaminyltransferase 8	Homo sapiens	Medium	1	18.3	18.3	14.9	20	18.3	19.3	15.4	17.5	18.7	24.1
Q67FW5	B3GNTL1	UDP-GlcNAc:betaGal beta-1,3-N-acetylglucosaminyltransferase-like protein 1	Homo sapiens	High	2	38.2	45.1	60.6	43.9	41.5	52.3	44.6	43.6	46.6	45.7
P15291	B4GALT1	Beta-1,4-galactosyltransferase 1	Homo sapiens	High	2	44.9	42.6	49.6	46.1	47.8	60.4	46.2	40.6	54.3	48
O60512	B4GALT3	Beta-1,4-galactosyltransferase 3	Homo sapiens	High	1	65	60.1	49.3	77.5	69.7	62.7	62.1	83.4	64.5	72
O60513	B4GALT4	Beta-1,4-galactosyltransferase 4	Homo sapiens	High	1	34.8	45.9	45.4	40.4	34.7	43	44.3	39.5	42.4	44.9
O43505	B4GAT1	Beta-1,4-glucuronyltransferase 1	Homo sapiens	High	6	310.4	354.7	424.9	347.1	366	361.9	368	305.8	326.2	386.4
Q9NWV8	BABAM1	BRISC and BRCA1-A complex member 1	Homo sapiens	High	12	2484.8	2604.4	2912.2	2553.7	2479.5	2739.7	2634.8	2425	2490.1	2828.1
O14867	BACH1	Transcription regulator protein BACH1	Homo sapiens	High	22	1527.1	1633.2	1738.6	1608	1495.1	1757.7	1590	1606.7	1545.9	1750
Q9BYV9	BACH2	Transcription regulator protein BACH2	Homo sapiens	High	4	181.2	173.4	177.5	160.8	178.5	176	167.3	181.3	176.4	202.6
Q92934	BAD	Bcl2-associated agonist of cell death	Homo sapiens	High	5	630.5	614.9	766.8	629.9	584.6	610.5	655.7	574.3	644.8	678.2
Q99933	BAG1	BAG family molecular chaperone regulator 1	Homo sapiens	High	10	1933	1995.7	2282.2	2057.8	2028.9	1989.6	2199.1	1973.7	1961	2229.9
O95816	BAG2	BAG family molecular chaperone regulator 2	Homo sapiens	High	17	2224	2310.1	2304.7	2290.8	2248.4	2314.5	2403.8	2275.8	2157.2	2275.3
O95817	BAG3	BAG family molecular chaperone regulator 3	Homo sapiens	High	16	1054	972.7	1091.7	939.7	986.8	947.3	1078	920.3	1039.8	1099.1
O95429	BAG4	BAG family molecular chaperone regulator 4	Homo sapiens	High	9	2341.6	2292.2	1448.4	2314.8	2176.3	2268.9	1786.5	2599.8	2134	1740.3
Q9UL15	BAG5	BAG family molecular chaperone regulator 5	Homo sapiens	High	20	3224	2919.4	3071.4	2979.8	3021.9	2964.4	3015	3091.3	3192.4	3140.7
P46379	BAG6	Large proline-rich protein BAG6	Homo sapiens	High	30	3358.4	3469.1	3348.1	3442.1	3397.8	3528.7	3164.1	3604.2	3243.4	3268.2
Q9P281	BAHCC1	BAH and coiled-coil domain-containing protein 1	Homo sapiens	High	1	34	31.9	39.3	36.5	31.2	29.3	35.3	29.6	27.4	33.9
Q8TBE0	BAHD1	Bromo adjacent homology domain-containing 1 protein	Homo sapiens	High	5	713.8	628	707.6	703.6	871.6	728.3	760.1	708.7	787	762.7
O94812	BAIAP3	BAI1-associated protein 3	Homo sapiens	Medium	2	165.9	165.7	128.7	160.7	193.7	173.1	157.3	156.7	177.8	165.7
Q16611	BAK1	Bcl-2 homologous antagonist/killer	Homo sapiens	High	3	232.8	200.1	312.7	231.2	261.5	236.3	262.1	182	256.9	277.5
Q13145	BAMBI	BMP and activin membrane-bound inhibitor homolog	Homo sapiens	Medium	1	38.8	42	41	38.7	37.7	51.6	43.5	50.7	35.9	47.7
O75531	BANF1	Barrier-to-autointegration factor	Homo sapiens	High	10	1418.5	1561.9	1427.4	1552.6	1435.2	1583.3	1398	1556	1390.8	1345.7
Q8N9N5	BANP	Protein BANP	Homo sapiens	High	11	1088	1037.4	1039.8	1063	1096.8	1066.8	1063.8	1101.4	1138.4	1123.8
Q92560	BAP1	Ubiquitin carboxyl-terminal hydrolase BAP1	Homo sapiens	High	16	1593.7	1564	1583.1	1526.1	1568.2	1522.9	1599.9	1556	1635.2	1635.4
Q8IXM2	BAP18	Chromatin complexes subunit BAP18	Homo sapiens	High	11	2038.7	1782.2	1792.8	1821.5	1757.9	1813.8	1813.3	1932.2	2003.2	1912.6
Q99728	BARD1	BRCA1-associated RING domain protein 1	Homo sapiens	High	19	1480.9	1414.5	1286.2	1325.4	1410.6	1349.4	1486.2	1476.8	1396.7	1340.1
Q9NR55	BATF3	Basic leucine zipper transcriptional factor ATF-like 3	Homo sapiens	High	3	123.9	110.9	116.2	120.3	186.5	163.7	107.9	105.9	141	85.9
Q07812	BAX	Apoptosis regulator BAX	Homo sapiens	High	9	2221.8	2380.3	2916	2331.8	2329.1	2196.9	2416.1	2250.9	2297	2522.1
Q9NRL2	BAZ1A	Bromodomain adjacent to zinc finger domain protein 1A	Homo sapiens	High	55	5980.9	6278.2	6709.7	6467.5	6418.8	6715.9	6575.3	6274.6	6335.7	6499.3
Q9UIG0	BAZ1B	Tyrosine-protein kinase BAZ1B	Homo sapiens	High	81	17452.6	17298.5	16423.1	17511.3	14957.1	17588.2	16893.2	17837.7	16956.3	16499.7
Q9UIF9	BAZ2A	Bromodomain adjacent to zinc finger domain protein 2A	Homo sapiens	High	32	2637.8	2460.8	2915.9	2515.8	2604.6	2576.8	2849.6	2422.5	2738	2895.4
Q9UIF8	BAZ2B	Bromodomain adjacent to zinc finger domain protein 2B	Homo sapiens	High	15	536.8	494.5	513.5	514.9	476	528.8	493.7	499.6	522.1	518.1
Q8NFJ9	BBS1	Bardet-Biedl syndrome 1 protein	Homo sapiens	High	1	8.5	14.2	13.5	9.2	8.4	11.7	17.1	10.1	11.8	14.8
Q96RK4	BBS4	Bardet-Biedl syndrome 4 protein	Homo sapiens	High	2	94.9	79.1	104.1	85.3	69	87.3	99.7	83.7	109.7	108
Q8WY36	BBX	HMG box transcription factor BBX	Homo sapiens	High	25	2596.9	2665.2	2336	2635.9	2291.2	2579.6	2316.2	2643.4	2499.9	2541.4
Q9UHQ4	BCAP29	B-cell receptor-associated protein 29	Homo sapiens	High	13	2196.7	2207	2168.4	2196.5	1907.2	2189	2216.6	2315.7	2224.2	2212.6
P51572	BCAP31	B-cell receptor-associated protein 31	Homo sapiens	High	19	6490.2	7569.8	7446.1	6987.3	5452.6	6937.5	6875.2	6964.6	6452	7088.4
O75934	BCAS2	Pre-mRNA-splicing factor SPF27	Homo sapiens	High	17	3627.1	3591.8	4006.3	3504.6	4014.5	3478.6	4208.7	3508.7	3565.8	3961.4
Q9H6U6	BCAS3	Breast carcinoma-amplified sequence 3	Homo sapiens	High	13	898.6	795.4	609.2	817.1	783.1	859.2	691.5	903.2	877.3	773.5
P54687	BCAT1	Branched-chain-amino-acid aminotransferase, cytosolic	Homo sapiens	High	17	3641.3	3769.1	3883.2	3701.6	3691.8	3831.7	3732.3	3731.5	3500.8	3707.4
O15382	BCAT2	Branched-chain-amino-acid aminotransferase, mitochondrial	Homo sapiens	High	13	2445.5	2356.9	2111.5	2384.3	2407.6	2432.4	2359.2	2473.3	2373.8	2219.5
Q9P287	BCCIP	BRCA2 and CDKN1A-interacting protein	Homo sapiens	High	17	3665.5	3730	3836.1	3634.1	3960.1	3718.4	3743.3	3845.3	3652	3842.3
Q9P287-2	BCCIP	Isoform 2 of BRCA2 and CDKN1A-interacting protein	Homo sapiens	High	4	171.8	174.4	175.7	187.1	173.7	190.9	168.7	183.6	162.2	154.7
Q7Z5W3	BCDIN3D	Pre-miRNA 5'-monophosphate methyltransferase	Homo sapiens	Medium	1	73.7	71.5	49.8	66.3	72.2	54.6	49.3	68.6	76.5	46.3
P06276	BCHE	Cholinesterase	Homo sapiens	High	9	849.7	719.3	670.2	789.7	819.1	746.7	729.1	750.3	808.5	754.6
P12694	BCKDHA	2-oxoisovalerate dehydrogenase subunit alpha, mitochondrial	Homo sapiens	High	19	2994.1	2984.2	2936.4	3083	2978	3083.6	2828	3057.9	2938.3	3012.8
P21953	BCKDHB	2-oxoisovalerate dehydrogenase subunit beta, mitochondrial	Homo sapiens	High	13	2249.8	2052.6	2111.6	2044.5	2265.2	1947.3	2374.6	2160.8	2178.7	2187.5
O14874	BCKDK	[3-methyl-2-oxobutanoate dehydrogenase [lipoamide]] kinase, mitochondrial	Homo sapiens	High	11	1233.8	1224	1733.3	1207.5	1250.3	1264.5	1547.9	1127.1	1259.9	1557.8
O95999	BCL10	B-cell lymphoma/leukemia 10	Homo sapiens	High	8	1148.2	1270.9	1102.9	1254.9	1155.3	1279.8	1210.7	1236.1	1114.4	1220.4
Q9H165	BCL11A	B-cell lymphoma/leukemia 11A	Homo sapiens	High	13	1061	964	1071.9	978.6	1123.2	1017.9	1040.7	966.8	1089.2	1207.7
Q9C0K0	BCL11B	B-cell lymphoma/leukemia 11B	Homo sapiens	High	20	2854.4	2540.4	2180.3	2620.2	2829.4	2652	2383.1	2752.3	2611.8	2556.1
P10415	BCL2	Apoptosis regulator Bcl-2	Homo sapiens	High	2	82.6	102.7	110.6	99	91.4	107.5	105.6	96.1	96.6	106.6
Q07817	BCL2L1	Bcl-2-like protein 1	Homo sapiens	High	3	774.5	770.8	1100.9	806.6	877.7	752.8	958.5	752.3	816.5	940.5
O43521	BCL2L11	Bcl-2-like protein 11	Homo sapiens	High	3	116.3	128.2	171.7	110.1	121.8	119	163.4	119.5	132.6	161.4
Q9HB09	BCL2L12	Bcl-2-like protein 12	Homo sapiens	High	2	105.1	121.6	144.6	120.8	124.8	124.4	143.5	138.3	126.1	132.8
Q9BXK5	BCL2L13	Bcl-2-like protein 13	Homo sapiens	High	15	1293.3	1472	1570.6	1380.7	1115.1	1456	1330.8	1354.7	1306.6	1465.4
Q4VC05-2	BCL7A	Isoform 2 of B-cell CLL/lymphoma 7 protein family member A	Homo sapiens	High	3	107.8	124.9	144.5	96.3	100.6	94.6	122	94.4	99.1	129.5
Q4VC05	BCL7A	B-cell CLL/lymphoma 7 protein family member A	Homo sapiens	High	6	896.9	976.9	894.6	977.8	840.3	1032.2	845.3	890.5	787.2	806.7
Q9BQE9	BCL7B	B-cell CLL/lymphoma 7 protein family member B	Homo sapiens	High	2	475.9	474.1	521.3	459.1	469.4	439.6	523.1	412	476.2	496.1
Q8WUZ0	BCL7C	B-cell CLL/lymphoma 7 protein family member C	Homo sapiens	High	3	120.1	117.5	177.1	109.7	115	147.8	149.4	117.8	128.6	139.1
O00512	BCL9	B-cell CLL/lymphoma 9 protein	Homo sapiens	High	13	740.5	685	733.3	702.1	723.4	712.8	690.8	670.4	810.5	810.4
Q9NYF8	BCLAF1	Bcl-2-associated transcription factor 1	Homo sapiens	High	31	4916.6	3977.5	4403.6	4042.9	4917.8	3798.4	4847.7	4307	4816.4	4813.2
Q6W2J9	BCOR	BCL-6 corepressor	Homo sapiens	High	28	1355.7	1533.9	1663.9	1508.3	1200.4	1595	1520	1452.1	1392.7	1539.3
Q5H9F3	BCORL1	BCL-6 corepressor-like protein 1	Homo sapiens	High	15	871.5	925.8	986.7	908.9	966.2	974.1	874	872.7	900.9	1003.2
P11274	BCR	Breakpoint cluster region protein	Homo sapiens	High	34	4121.9	3840.4	4265.3	3802.8	3930.1	3899.4	4214.6	3751.9	4104.1	4210.4
Q9Y276	BCS1L	Mitochondrial chaperone BCS1	Homo sapiens	High	12	1126.9	1171.9	1189.8	1178.8	1229.8	1277	1123.2	1152.4	1187.5	1242.7
Q02338	BDH1	D-beta-hydroxybutyrate dehydrogenase, mitochondrial	Homo sapiens	High	18	2637.4	2596.4	2900.2	2525.7	2643.6	2741.3	2617.8	2532	2571	2636.5
Q9BUT1	BDH2	3-hydroxybutyrate dehydrogenase type 2	Homo sapiens	High	13	1965.3	1700.3	1854.7	1783.7	1813	1743.4	1899.8	1771.1	1929.3	1882.1
A6H8Y1	BDP1	Transcription factor TFIIIB component B'' homolog	Homo sapiens	High	13	474.7	486	611	464.4	508.2	468.3	455.8	460	487.9	536.5
Q14457	BECN1	Beclin-1	Homo sapiens	High	13	983.9	1134.8	1048.1	1046.5	1035.6	1115.6	954.4	1036.5	994.2	879.3
Q5T5X7	BEND3	BEN domain-containing protein 3	Homo sapiens	High	33	2585.7	2440.6	2458.1	2533.5	2526	2535.1	2467.4	2547.3	2577.8	2499.4
Q6ZU67	BEND4	BEN domain-containing protein 4	Homo sapiens	High	2	43.2	34.8	19.1	31.5	48.8	37.2	26.9	42.6	32.4	34.8
Q7L4P6	BEND5	BEN domain-containing protein 5	Homo sapiens	High	11	387.8	411	430.4	379.8	320.5	424.6	406.6	388.8	338.7	354.3
O15155	BET1	BET1 homolog	Homo sapiens	High	4	152.5	154.1	191.2	141.7	144.6	143.8	175.3	141	145.1	156.6
Q9NYM9	BET1L	BET1-like protein	Homo sapiens	High	5	218.4	243.7	298.6	222	214.6	236.1	222.8	215.7	222.6	217.6
Q96G01	BICD1	Protein bicaudal D homolog 1	Homo sapiens	High	15	857.2	1001.6	947.9	970.1	921.3	1008.2	911.1	908.1	872.1	1001.2
Q8TD16	BICD2	Protein bicaudal D homolog 2	Homo sapiens	High	33	2693.1	2682.1	3050.6	2819.7	2842.1	2830.5	2882.1	2585.9	2725.9	3104.1
O00499	BIN1	Myc box-dependent-interacting protein 1	Homo sapiens	High	20	2500.9	2449.1	2327.3	2451.8	2423	2354.5	2465.6	2529.8	2274	2343.1
Q9UBW5	BIN2	Bridging integrator 2	Homo sapiens	High	16	1664.5	1696.2	1654.1	1764.8	1613.5	1684.5	1574.2	1764.1	1636.7	1610.7
Q9NQY0	BIN3	Bridging integrator 3	Homo sapiens	High	2	87.8	78.9	110.6	86.4	104.9	90.9	102.5	84.8	98.7	122.6
Q13490	BIRC2	Baculoviral IAP repeat-containing protein 2	Homo sapiens	High	12	972.3	961	1158.7	989.8	984.1	969.9	1068.7	907	1050.9	1140.6
O15392	BIRC5	Baculoviral IAP repeat-containing protein 5	Homo sapiens	High	11	1524.5	1472.7	1697.1	1515.4	3034.9	1660.2	1600.3	1458.9	1541.5	1733.7
Q9NR09	BIRC6	Baculoviral IAP repeat-containing protein 6	Homo sapiens	High	109	10956.9	10622.8	11043.1	10772.1	10964.2	10687	10823.6	10523.1	10941.7	11458.1
P54132	BLM	Bloom syndrome protein	Homo sapiens	High	40	2830.6	2995.9	3137.1	2999.2	2912.1	3014.5	3116.3	2937.7	2847.8	3032.2
Q13867	BLMH	Bleomycin hydrolase	Homo sapiens	High	19	2587.2	2940.1	2611.3	3134.9	3076.6	3093	2692.3	3020.3	2734.1	2870.9
P78537	BLOC1S1	Biogenesis of lysosome-related organelles complex 1 subunit 1	Homo sapiens	High	6	800.4	718	732.1	816.3	812.8	830.8	756.7	810	796.5	768
Q6QNY1	BLOC1S2	Biogenesis of lysosome-related organelles complex 1 subunit 2	Homo sapiens	High	6	768.1	809.1	880.9	799.1	814.3	755.3	918.9	773.8	783.3	843.3
Q6QNY0	BLOC1S3	Biogenesis of lysosome-related organelles complex 1 subunit 3	Homo sapiens	High	7	518	559	618.8	543	548.1	535.8	569.9	502.2	523.9	602.7
Q9NUP1	BLOC1S4	Biogenesis of lysosome-related organelles complex 1 subunit 4	Homo sapiens	High	3	373.5	356.1	291.7	354.9	398.8	327.3	347.5	373.8	391.6	407.1
Q8TDH9	BLOC1S5	Biogenesis of lysosome-related organelles complex 1 subunit 5	Homo sapiens	High	8	967.4	933.2	1170	865.5	987.5	915.1	1077.8	892.1	1047.4	1245.9
Q9UL45	BLOC1S6	Biogenesis of lysosome-related organelles complex 1 subunit 6	Homo sapiens	High	5	205.8	200.7	205.2	218.2	215.1	229.4	209.2	195.4	222.5	218.3
P53004	BLVRA	Biliverdin reductase A	Homo sapiens	High	14	2678.7	2591.5	2683.6	2508.1	2559.5	2511.9	2727.5	2503.5	2558.4	2683.7
P30043	BLVRB	Flavin reductase (NADPH)	Homo sapiens	High	4	206.9	215.2	312.3	210.4	210.8	242.3	207.1	198.1	204.8	259
Q9H2G9	BLZF1	Golgin-45	Homo sapiens	High	7	301.3	283.7	296.7	311.5	333.4	360.6	280.3	296.8	283.3	301
P35226	BMI1	Polycomb complex protein BMI-1	Homo sapiens	High	10	1470.2	1457.2	1253.6	1456.9	1473.5	1477.3	1381.6	1553	1425.2	1339.7
Q9NSY1	BMP2K	BMP-2-inducible protein kinase	Homo sapiens	High	35	2934.9	2848.5	2975.4	2859.2	3021.8	3033.3	3012.3	2851.1	2892.2	3131.1
P36894	BMPR1A	Bone morphogenetic protein receptor type-1A	Homo sapiens	High	3	121.8	145.1	177.6	130.5	124	147	130	112.5	144.1	164.8
Q14692	BMS1	Ribosome biogenesis protein BMS1 homolog	Homo sapiens	High	41	6518.2	5938.3	5424.8	5924	4780.9	5514.2	5748.1	6097.5	6460	5959.2
Q1RMZ1	BMT2	Probable methyltransferase BMT2 homolog	Homo sapiens	High	2	39.6	42.4	34.7	38.9	32.3	40.8	40.2	43.9	33.9	41.2
Q01954	BNC1	Zinc finger protein basonuclin-1	Homo sapiens	Medium	1	59	70.4	53.5	32.6	67.1	41	77.7	47.9	34.5	43.2
Q12981	BNIP1	Vesicle transport protein SEC20	Homo sapiens	High	12	1396.8	1365.2	1388.4	1360	1504.9	1357	1475.3	1391.9	1361.3	1352.5
Q12982	BNIP2	BCL2/adenovirus E1B 19 kDa protein-interacting protein 2	Homo sapiens	High	3	283	263.9	318.5	279.6	283.3	285.2	264.2	276	287.1	309.6
J3KN59	BNIP2	BCL2/adenovirus E1B 19 kDa protein-interacting protein 2	Homo sapiens	Medium	1	12.5	9.3	17.2	13.4	7.3	14.9	13.1	10	14.3	12.8
Q12983	BNIP3	BCL2/adenovirus E1B 19 kDa protein-interacting protein 3	Homo sapiens	High	5	501.6	455.7	361.3	367.5	397	402	349.3	394.9	389	334.6
O60238	BNIP3L	BCL2/adenovirus E1B 19 kDa protein-interacting protein 3-like	Homo sapiens	High	4	145.1	105.1	86	87.7	119.9	104.1	88.7	106.8	105.9	83.3
Q96IK1	BOD1	Biorientation of chromosomes in cell division protein 1	Homo sapiens	High	2	146.3	137.2	146.4	150.6	147.9	174.9	143.6	132.1	146.7	159.6
Q8NFC6	BOD1L1	Biorientation of chromosomes in cell division protein 1-like 1	Homo sapiens	High	92	9361.5	10028.1	9770.8	9767.6	9291.3	9951.5	9012.6	9839	9287.6	9686.4
Q9Y3E2	BOLA1	BolA-like protein 1	Homo sapiens	High	6	299.4	308.6	314.7	306.3	226	287.6	302.3	317.5	296.5	330.5
Q9H3K6	BOLA2	BolA-like protein 2	Homo sapiens	High	6	1618.9	1714.5	1224.5	1829.3	1578.4	1776	1349.1	1936.4	1560.5	1287
Q53S33	BOLA3	BolA-like protein 3	Homo sapiens	High	5	726.4	629.6	561.8	687.7	786	678.1	605.7	691.5	761.3	662.3
Q7L3V2	BOP	Protein Bop	Homo sapiens	High	1	14.8	12.8	11.1	9.5	12.8	18	9.3	11.9	11.1	16.7
Q14137	BOP1	Ribosome biogenesis protein BOP1	Homo sapiens	High	36	5876	5007.8	5314.1	5228.1	5940.4	5225.2	5672.2	5343.7	5929.7	5727.6
Q6PGQ7	BORA	Protein aurora borealis	Homo sapiens	High	8	410.9	435	503.1	439	420	472.1	483.3	428.9	433.1	484.9
Q969J3	BORCS5	BLOC-1-related complex subunit 5	Homo sapiens	High	9	1014.7	1061.3	981	1059.2	1028.9	1128.2	963.8	1072.4	923.6	1019.8
Q96GS4	BORCS6	BLOC-1-related complex subunit 6	Homo sapiens	High	11	636.5	649.4	629.2	652.8	605.3	691.1	693.1	659.1	614	602.2
Q96B45	BORCS7	BLOC-1-related complex subunit 7	Homo sapiens	High	4	266.3	254.4	309.5	267.9	289.3	268.2	312.4	250.3	282.1	330.4
Q96FH0	BORCS8	BLOC-1-related complex subunit 8	Homo sapiens	High	5	340.5	415.7	403.1	431.6	322.1	514.9	348.2	385.1	328.4	375.8
P07738	BPGM	Bisphosphoglycerate mutase	Homo sapiens	High	5	418	460	408.2	447.3	467.4	477.7	428.3	465.5	399.5	443.6
Q86WA6	BPHL	Valacyclovir hydrolase	Homo sapiens	High	7	839.8	845.4	570.7	861.1	832.8	812.3	694.6	908.9	817.1	684.5
O95861	BPNT1	3'(2'),5'-bisphosphate nucleotidase 1	Homo sapiens	High	15	2746.3	2526.3	2409.4	2682.8	2755.7	2530.4	2571.2	2633.9	2616.8	2541.7
Q12830	BPTF	Nucleosome-remodeling factor subunit BPTF	Homo sapiens	High	84	8009.1	8708.9	8873.7	8455	7879.9	8111.4	8025.6	8213.1	8094.5	8371.7
H7C560	BRAF	Serine/threonine-protein kinase B-raf (Fragment)	Homo sapiens	High	1	24.7	27.5	25.3	25.8	23.5	28.1	21.9	28.6	28.8	20.6
P15056	BRAF	Serine/threonine-protein kinase B-raf	Homo sapiens	High	11	1013.5	1010.9	1100	1000.4	1002.7	983.3	1153.5	1011.2	1061.5	1118.8
Q7Z569	BRAP	BRCA1-associated protein	Homo sapiens	High	29	2758.1	2832.6	2796.6	2782	2673.3	2866.2	2934.4	2701.8	2835.3	3068.8
Q6PJG6	BRAT1	BRCA1-associated ATM activator 1	Homo sapiens	High	19	1777.4	1798	1651.9	1859.2	2014.4	1916.3	1742.2	1875.6	1814.7	1677.6
P38398	BRCA1	Breast cancer type 1 susceptibility protein	Homo sapiens	High	49	3423.2	3333.1	3752.8	3249.3	3349.1	3444	3392.4	3264.5	3449.2	3674.2
P51587	BRCA2	Breast cancer type 2 susceptibility protein	Homo sapiens	High	59	3350.5	3509.5	3731.7	3438.5	3074.7	3668.6	3518	3449.5	3446.6	3693.6
P46736	BRCC3	Lys-63-specific deubiquitinase BRCC36	Homo sapiens	High	14	1667	1632.5	1528.1	1616	1600.6	1634.2	1515.1	1623	1567.2	1505.2
O95696-2	BRD1	Isoform 2 of Bromodomain-containing protein 1	Homo sapiens	Medium	3	597.1	621.6	677.2	694.3	497.1	648.7	647.4	603.1	612.7	664.6
O95696	BRD1	Bromodomain-containing protein 1	Homo sapiens	High	29	2898.2	2548.8	2698.1	2568.4	2614.5	2622.4	2636.3	2611.2	2949.6	2930.6
P25440	BRD2	Bromodomain-containing protein 2	Homo sapiens	High	28	4456.3	4163.3	4372.9	4240.6	4420.6	4090.2	4262.2	4256.8	4510.3	4554.9
Q15059	BRD3	Bromodomain-containing protein 3	Homo sapiens	High	21	2187.2	2020.2	1833.2	2046.1	2006.4	2017	1951.8	2036.5	2104.8	2113.5
O60885	BRD4	Bromodomain-containing protein 4	Homo sapiens	High	31	5408.7	5206.9	5003.7	5278.3	5171.5	5200.9	5052.1	5270	5317	5150.8
Q9NPI1	BRD7	Bromodomain-containing protein 7	Homo sapiens	High	28	2996.5	3092.3	3343.3	3072.2	2783.4	3191.4	3121.1	3006.5	3054.1	3223.7
Q9H0E9	BRD8	Bromodomain-containing protein 8	Homo sapiens	High	27	2951	3294.7	3646.8	3179.7	3242.6	3133.9	3280.3	2984.6	2990.3	3325.6
Q9H8M2	BRD9	Bromodomain-containing protein 9	Homo sapiens	High	12	1009.5	1125.7	723.2	1042.9	1137.9	1210.3	845.5	1117.4	1088.5	810.2
Q58F21	BRDT	Bromodomain testis-specific protein	Homo sapiens	High	1	119.4	133.3	150	120.1	125.3	125.4	129.1	111.4	138	141.8
Q9NXR7	BRE	BRCA1-A complex subunit BRE	Homo sapiens	High	15	2169.1	2159.9	1897.4	2201.7	2157.4	2180.2	1968.9	2259.3	2155.9	2100.2
Q92994	BRF1	Transcription factor IIIB 90 kDa subunit	Homo sapiens	High	14	1231.1	1210.3	1055.7	1239.5	1108.9	1356.5	1156.4	1268	1203.9	1147.3
Q9HAW0	BRF2	Transcription factor IIIB 50 kDa subunit	Homo sapiens	High	4	216.7	189.1	189.4	211.1	230.6	222.2	187.6	218.2	203.8	195.5
Q8WY22	BRI3BP	BRI3-binding protein	Homo sapiens	High	3	341.3	368.5	434.9	368.3	362.8	363.3	404.6	354.9	344.4	401.4
Q9BX63	BRIP1	Fanconi anemia group J protein	Homo sapiens	High	26	2306.9	2202.4	2102.2	2181.7	2112.9	2297.7	2203.9	2244.1	2319.3	2142
Q8TDN6	BRIX1	Ribosome biogenesis protein BRX1 homolog	Homo sapiens	High	21	3672	3883.2	3475	3822.9	3332.3	3914.8	3753.8	4069.6	3625.5	3285.7
Q8WUW1	BRK1	Protein BRICK1	Homo sapiens	High	9	1039.4	1057	1043.8	1025.7	1058.8	1027	1022.9	1129.3	1052.3	1056.1
Q9HCU9	BRMS1	Breast cancer metastasis-suppressor 1	Homo sapiens	High	13	1234.3	1356.5	1350.3	1372	1164.1	1362.7	1316.1	1280.4	1253.4	1314
Q5PSV4	BRMS1L	Breast cancer metastasis-suppressor 1-like protein	Homo sapiens	High	5	236.4	270.8	268.3	277.3	277.5	283.2	284.9	257.6	250.1	267.4
Q5VW32	BROX	BRO1 domain-containing protein BROX	Homo sapiens	High	12	1211	1342.1	1162	1302.7	1238.2	1291	1274.3	1282.6	1115.4	1161
P55201	BRPF1	Peregrin	Homo sapiens	High	18	1871.7	1663.1	1505.6	1537.9	1355	1415.6	1451.3	1359.9	1448.6	1509.5
Q9ULD4	BRPF3	Bromodomain and PHD finger-containing protein 3	Homo sapiens	High	6	175.4	192.5	196.9	188.9	175.6	207.1	171.6	195.3	190.5	173.3
Q9NSI6	BRWD1	Bromodomain and WD repeat-containing protein 1	Homo sapiens	High	10	1325.5	1301.9	1059.8	1456.6	1402.9	1398	1076	1418.2	1493.7	1386
Q6RI45	BRWD3	Bromodomain and WD repeat-containing protein 3	Homo sapiens	High	3	73.6	87.7	104.5	89	73.1	88.1	75.2	87.3	79.2	81.3
Q9NW68	BSDC1	BSD domain-containing protein 1	Homo sapiens	High	12	1389.8	1409.8	1603.3	1472.9	1298.3	1700.5	1418.1	1337	1400.9	1400
P35613	BSG	Basigin	Homo sapiens	High	11	2370.2	2969.1	3152.7	2526.9	2334.4	2508.4	3066.3	2622.4	2131.2	2587.8
Q10589	BST2	Bone marrow stromal antigen 2	Homo sapiens	High	5	371.9	427.3	537.4	456.9	466.1	493.9	471.9	419.4	437.3	466.9
O14981	BTAF1	TATA-binding protein-associated factor 172	Homo sapiens	High	43	4107.5	3765	3446.3	3912	4200.7	4087.7	3803.7	4141.8	4081.9	3749.2
Q9H0C5	BTBD1	BTB/POZ domain-containing protein 1	Homo sapiens	High	2	21.8	22.6	21.2	24.1	21	23.1	19.7	23.1	18.4	23.9
Q9BSF8	BTBD10	BTB/POZ domain-containing protein 10	Homo sapiens	High	2	97.6	72.4	97.9	86.8	107.8	105.6	105.4	92.9	104.4	89.4
Q9BX70	BTBD2	BTB/POZ domain-containing protein 2	Homo sapiens	High	5	273.5	258.3	316.4	267.5	239.9	264.7	262.1	266.5	269.9	296.1
Q96Q07	BTBD9	BTB/POZ domain-containing protein 9	Homo sapiens	High	6	226	212.5	260.5	203.6	220.5	223.2	215.4	201	245.8	245.3
P20290	BTF3	Transcription factor BTF3	Homo sapiens	High	12	5963.3	6038.4	5542.1	6116.1	6802.4	6115.7	5761.5	6581.9	6138.4	6494.3
Q96K17	BTF3L4	Transcription factor BTF3 homolog 4	Homo sapiens	High	11	2350.8	2408.1	2011.3	2511.5	2566.6	2440.6	2269.3	2769.9	2428.4	2283.6
Q14201	BTG3	Protein BTG3	Homo sapiens	High	2	75.4	63.1	56.9	73.2	69.3	74	62.2	71.2	79.2	64.1
Q7KYR7	BTN2A1	Butyrophilin subfamily 2 member A1	Homo sapiens	High	4	125.8	102.7	132.5	106.7	130.8	129.9	119.2	103.7	141.8	139.8
O00481	BTN3A1	Butyrophilin subfamily 3 member A1	Homo sapiens	High	2	96.2	103.1	115	119.8	91.2	122.3	111.7	76.2	100.6	90.1
P78410	BTN3A2	Butyrophilin subfamily 3 member A2	Homo sapiens	High	3	393.6	345.5	346.4	346.6	368	352	391.5	350	380.6	368.2
O00478	BTN3A3	Butyrophilin subfamily 3 member A3	Homo sapiens	High	4	1257.1	1321.4	1278.3	1347.7	1219.4	1365.6	1306.4	1261.3	1186.8	1292.2
Q9Y297	BTRC	F-box/WD repeat-containing protein 1A	Homo sapiens	High	5	182.6	204.6	206.4	224.5	171.6	222	200.8	204.6	196.9	197
O43683	BUB1	Mitotic checkpoint serine/threonine-protein kinase BUB1	Homo sapiens	High	33	2704.5	2498	2675.8	2760.3	5067.7	2858.7	2873.6	2819.7	3011.2	2897.4
O60566	BUB1B	Mitotic checkpoint serine/threonine-protein kinase BUB1 beta	Homo sapiens	High	41	2607.6	2728.3	3078.1	2821.1	3646.7	3029.2	2882.5	2746.3	2773.3	2968.7
O43684	BUB3	Mitotic checkpoint protein BUB3	Homo sapiens	High	18	3144.5	3465.1	3684.2	3328.4	3226.8	3112.3	3662.8	3379.4	3083.5	3474.6
Q9BRD0	BUD13	BUD13 homolog	Homo sapiens	High	19	1516.8	1529.7	1669.9	1492.1	1534	1520.4	1566.1	1492.5	1567.9	1632.1
P41223	BUD31	Protein BUD31 homolog	Homo sapiens	High	12	1579.1	1454.9	1136.6	1461.2	1354.6	1493.9	1376.9	1655	1419.7	1300
Q13895	BYSL	Bystin	Homo sapiens	High	26	4729.4	4774.1	5301.9	4723.3	4655.5	4649.7	5076.9	4741.9	4949.6	4823.4
Q7L1Q6	BZW1	Basic leucine zipper and W2 domain-containing protein 1	Homo sapiens	High	21	5579.9	4936.2	5411.4	4894.1	5586.1	4775.6	5481	5109.7	5403.6	5533.8
Q9Y6E2	BZW2	Basic leucine zipper and W2 domain-containing protein 2	Homo sapiens	High	27	7673	7703.3	8615.6	7698.5	8312.9	7691.8	8303.9	7793.6	7875.9	8320.9
Q8N655	C10orf12	Uncharacterized protein C10orf12	Homo sapiens	High	25	1513	1594	1716	1601.1	1602	1718.7	1546	1540.1	1558.5	1595.7
Q5T2E6	C10orf76	UPF0668 protein C10orf76	Homo sapiens	High	16	1380.8	1221.3	1252.2	1291	1399.6	1424.3	1327.4	1279.1	1431.2	1379.9
Q9H8K7	C10orf88	Uncharacterized protein C10orf88	Homo sapiens	High	9	330.1	340.8	363.6	352.7	353.4	378.7	372.8	334.9	343.9	386.2
Q9H0W9	C11orf54	Ester hydrolase C11orf54	Homo sapiens	High	11	2046.6	1839.7	1672.3	1891.8	2191.5	1889	1791.5	2079.6	1961	1942.7
Q6ZUT1	C11orf57	Uncharacterized protein C11orf57	Homo sapiens	High	2	117.3	126.6	118.6	122	119.7	125.2	113.7	125	126.7	134.2
Q9H3H3	C11orf68	UPF0696 protein C11orf68	Homo sapiens	High	7	945.2	939.5	946.1	897	824	1012.6	871.3	883.8	968.6	875
Q9BUA3	C11orf84	Uncharacterized protein C11orf84	Homo sapiens	High	11	426.2	501.9	572.5	480.9	376.1	567.1	487.8	494.3	464.8	463.5
Q7Z7L8	C11orf96	Uncharacterized protein C11orf96	Homo sapiens	Medium	1	16.7	16.1	22.6	15	17.5	15.9	15.1	14.8	15.3	23.7
E9PRG8	C11orf98	Uncharacterized protein C11orf98	Homo sapiens	Medium	1	300.3	166.6	231	192.5	360.9	194.7	257.3	182	319.8	283.8
Q9HB07	C12orf10	UPF0160 protein MYG1, mitochondrial	Homo sapiens	High	16	1811	1740.1	1782.4	1792.4	1851.9	1780.9	1615.8	1707.5	1737.9	1764.9
Q8N999	C12orf29	Uncharacterized protein C12orf29	Homo sapiens	High	10	1999.2	2205	1377.6	2082.8	2068	1897.1	1776.9	2434.7	1782.9	1575.9
Q9NQ89	C12orf4	Protein C12orf4	Homo sapiens	High	13	504.5	506.1	559.2	501.8	498.9	543.9	544.8	507.9	555.7	560.4
Q96C57	C12orf43	Uncharacterized protein C12orf43	Homo sapiens	High	7	868	1019.1	1190.5	975.1	798.7	1041.3	1057.8	928.5	934.9	1051.2
Q8N5I9	C12orf45	Uncharacterized protein C12orf45	Homo sapiens	High	9	1160.2	1170.8	1039.3	1220.6	1250	1258.5	1112.2	1225.2	1172.2	1130.5
Q99622	C12orf57	Protein C10	Homo sapiens	High	7	1354.3	1456.4	1456.1	1418	1366.7	1527.7	1393.1	1471.3	1360	1479.5
Q5U649	C12orf60	Uncharacterized protein C12orf60	Homo sapiens	Medium	2	120.9	141.3	190.5	143.9	127.3	152.8	178.6	136.2	137.3	145.3
Q9H3J6	C12orf65	Probable peptide chain release factor C12orf65, mitochondrial	Homo sapiens	High	4	673.7	635.5	521.9	688.5	691.4	684	541.9	712.5	618.6	536.6
Q96MD2	C12orf66	UPF0536 protein C12orf66	Homo sapiens	High	5	377.7	411.8	478.2	416.7	442.7	429.6	444.2	375.6	385.8	492.7
Q69YU5	C12orf73	Uncharacterized protein C12orf73	Homo sapiens	High	4	575.2	743	476.5	797.2	608.9	877.7	543.5	847.5	576.8	516.2
Q9UKR5	C14orf1	Probable ergosterol biosynthetic protein 28	Homo sapiens	High	3	658.6	745	857.8	676.3	665.1	676.3	799	662.9	654.4	653.9
Q9NWQ9	C14orf119	Uncharacterized protein C14orf119	Homo sapiens	High	2	267.9	282.9	294.5	286.1	252.9	310	253.7	276.1	254.6	303.2
Q9BXV9	C14orf142	Uncharacterized protein C14orf142	Homo sapiens	High	5	696.8	733.1	968.8	701.4	733.9	671.2	820.7	659.9	697	815.3
Q7Z3D6	C14orf159	UPF0317 protein C14orf159, mitochondrial	Homo sapiens	High	22	2470.5	2391.5	2623.1	2436.3	2566.5	2424.6	2567.7	2462.7	2472.5	2542.1
Q9Y224	C14orf166	UPF0568 protein C14orf166	Homo sapiens	High	16	4937.4	4881.5	5460	4848.6	5097.9	4941.9	5263.2	4854.8	4926.5	5201.4
Q86SX3	C14orf80	Uncharacterized protein C14orf80	Homo sapiens	High	8	246	220.9	257.4	233	251.9	243.6	235.5	242.3	243.9	230.5
Q6ZRI6	C15orf39	Uncharacterized protein C15orf39	Homo sapiens	High	8	513.4	494.7	404	489.2	438.6	533	412.5	516.9	522	520.6
Q8WUR7	C15orf40	UPF0235 protein C15orf40	Homo sapiens	High	6	659	801.8	777.2	732.1	665.3	768.9	691.5	686.9	678.3	752.3
Q9Y2V0	C15orf41	Uncharacterized protein C15orf41	Homo sapiens	High	6	361.3	384.6	421.2	381.1	363.3	407.7	411.4	392.2	372.6	415.8
Q9BV29	C15orf57	Uncharacterized protein C15orf57	Homo sapiens	High	3	55.3	46.7	71.7	44.1	43.2	55.8	60.6	37	48.8	63.2
A6NNL5	C15orf61	Uncharacterized protein C15orf61	Homo sapiens	Medium	2	237	234.7	174.5	237.9	272.1	268.9	209.9	242.5	273.1	223.3
Q96S19	C16orf13	UPF0585 protein C16orf13	Homo sapiens	High	11	1299.6	1372.6	1388.1	1308	1340.5	1353	1414.1	1364.6	1251.6	1317.3
Q6UWD8	C16orf54	Transmembrane protein C16orf54	Homo sapiens	High	4	37.2	36.6	23	44.4	32.3	35.9	22.3	42.3	36.2	26.9
Q96GQ5	C16orf58	RUS1 family protein C16orf58	Homo sapiens	High	12	1587.8	1723.3	1853.6	1697.4	1621.3	1805.4	1687.4	1561.6	1702.4	1711.2
Q7L2K0	C16orf59	Uncharacterized protein C16orf59	Homo sapiens	High	4	189.2	205.5	214.1	198.1	181.9	187.3	189.8	182.4	181.7	206
Q7Z3J2	C16orf62	UPF0505 protein C16orf62	Homo sapiens	High	33	3807.3	4117.2	3880.3	3933	3814.8	4138.3	3919.2	3907	3856.4	3838.6
Q9BSU1	C16orf70	UPF0183 protein C16orf70	Homo sapiens	High	7	210.7	185.9	180.2	206.1	235.2	198.3	183.5	232.6	213	222.9
Q6PH81	C16orf87	UPF0547 protein C16orf87	Homo sapiens	High	5	256.5	289.2	271.7	277.3	239.9	285.9	271.5	289.7	251.2	260.2
Q8N3J3	C17orf53	Uncharacterized protein C17orf53	Homo sapiens	High	5	846.6	887	802.3	850.7	802.2	891.4	807.9	921.1	821.2	794.2
Q9BQA9	C17orf62	Uncharacterized protein C17orf62	Homo sapiens	High	5	662.8	791.2	784.1	754.1	706.8	839.9	709.9	742.3	720.9	721.6
Q9HAS0	C17orf75	Protein Njmu-R1	Homo sapiens	High	22	2956.8	2950.1	3039	2892	2924.2	3015.3	3038.2	2879.6	2855	2979.4
Q9BSJ5	C17orf80	Uncharacterized protein C17orf80	Homo sapiens	High	18	1343.5	1338.2	1392.1	1408.2	1490	1435.9	1403.6	1368.4	1366.3	1410.4
A6NHQ4	C17orf96	Uncharacterized protein C17orf96	Homo sapiens	High	2	18.7	18.1	12.4	16.8	11	19.2	16	13.8	16.7	21.1
Q32NC0	C18orf21	UPF0711 protein C18orf21	Homo sapiens	High	4	123.6	120.8	174.2	133.6	138.7	146.3	143.9	126	135.1	152
Q96B23-2	C18orf25	Isoform 2 of Uncharacterized protein C18orf25	Homo sapiens	Medium	3	292.9	366.7	351.1	364.1	329.9	353.4	361.4	315.7	277.2	345.2
Q96B23	C18orf25	Uncharacterized protein C18orf25	Homo sapiens	High	11	290.3	352.2	343.1	345.1	303.4	366.3	272.8	334.5	275.5	326.7
Q8TCD1	C18orf32	UPF0729 protein C18orf32	Homo sapiens	High	3	584.3	600.2	694.9	626.2	637.4	668	549.3	555.5	574.4	680.8
Q96DM3	C18orf8	Uncharacterized protein C18orf8	Homo sapiens	High	17	1863	1879.7	2185.4	1898.5	1954.7	1891.8	2131	1834.7	1912.2	2051.7
Q9UFG5	C19orf25	UPF0449 protein C19orf25	Homo sapiens	High	5	308.8	347.5	400.4	325.6	340.1	320.1	317.9	312.5	355.1	359.1
Q9BQ61	C19orf43	Uncharacterized protein C19orf43	Homo sapiens	High	11	1647.8	2242.5	1441.5	1956.5	1705.6	1997.8	1570	2120.5	1556.8	1481.1
Q8N9M1	C19orf47	Uncharacterized protein C19orf47	Homo sapiens	High	11	868.7	814.2	794.3	820.3	803.8	880.2	829.6	821.3	856.6	817.4
Q9BSF4	C19orf52	Uncharacterized protein C19orf52	Homo sapiens	High	7	169.1	175.2	244.1	159.3	165.2	177	195.6	163.8	152.6	187.3
Q9UNZ5	C19orf53	Leydig cell tumor 10 kDa protein homolog	Homo sapiens	High	10	2849.2	3108.9	2960	2854.2	2368	3005.1	2945.8	2973.5	2785.8	2828.4
Q5BKX5	C19orf54	UPF0692 protein C19orf54	Homo sapiens	High	2	127.9	116.8	108.6	116.1	124.5	105.1	100.4	140.3	125	120.7
Q86XI8	C19orf68	Uncharacterized protein C19orf68	Homo sapiens	High	5	201.9	197.4	146	198.3	212.8	222.3	170.1	217	207.5	182.4
Q13901	C1D	Nuclear nucleic acid-binding protein C1D	Homo sapiens	Medium	1	158.6	163.1	204.1	177	154.7	179.4	166.4	141.9	149.9	165.2
Q9NS00	C1GALT1	Glycoprotein-N-acetylgalactosamine 3-beta-galactosyltransferase 1	Homo sapiens	High	11	844.7	806.6	931.1	834.6	834	949	832.9	783.6	884.8	871.8
Q96EU7	C1GALT1C1	C1GALT1-specific chaperone 1	Homo sapiens	High	9	646.4	642	597.3	675.1	689.6	667.7	662.6	661.2	641.7	631.8
Q9NX04	C1orf109	Uncharacterized protein C1orf109	Homo sapiens	High	4	595.3	536.2	775.9	546.2	691.5	538.3	700.6	489.5	661.6	737.4
Q9NSG2	C1orf112	Uncharacterized protein C1orf112	Homo sapiens	High	12	569.7	612.7	539.4	617.8	657.2	623.8	549.5	607.4	555	526.4
Q6ZSJ8	C1orf122	Uncharacterized protein C1orf122	Homo sapiens	High	2	228.8	226.9	308.9	253.5	224.9	263.4	265.7	229	245.2	268.8
Q9NWV4	C1orf123	UPF0587 protein C1orf123	Homo sapiens	High	9	1294.7	1193.8	1381.4	1186.2	1297.8	1294.6	1176.7	1095.1	1244.6	1287.6
Q8NDD1	C1orf131	Uncharacterized protein C1orf131	Homo sapiens	High	14	1669.4	1760.2	1619.6	1748.3	1488.3	1717.6	1575.9	1856.4	1665.1	1523.8
Q8IYL3	C1orf174	UPF0688 protein C1orf174	Homo sapiens	High	8	459	493.9	536.5	497.8	567.1	515.6	512.4	497.2	484.7	531.1
Q6ZWK4	C1orf186	Uncharacterized protein C1orf186	Homo sapiens	High	5	409.1	413.3	460.5	456.8	420.7	454.1	453	406.7	405.5	488.5
Q9H425	C1orf198	Uncharacterized protein C1orf198	Homo sapiens	High	8	311.6	345.1	320	283	272.6	338.2	315.7	289.8	307.4	284.2
Q9H246	C1orf21	Uncharacterized protein C1orf21	Homo sapiens	High	3	185	149.4	129.7	166.2	183.3	154.2	138.5	162.7	178.6	160.3
Q9BWL3	C1orf43	Uncharacterized protein C1orf43	Homo sapiens	High	6	505.9	483.4	577.6	530	457.1	519.7	572.1	489.3	548.5	585.8
Q9BV19	C1orf50	Uncharacterized protein C1orf50	Homo sapiens	High	7	348.4	370.1	383.1	361	327.2	382.4	371.4	378.4	332.9	342
Q8N6N3	C1orf52	UPF0690 protein C1orf52	Homo sapiens	High	9	1808	1881.8	1923.1	1856.9	2031.8	1817.8	2040.8	1959.7	1726.9	1938.3
Q07021	C1QBP	Complement component 1 Q subcomponent-binding protein, mitochondrial	Homo sapiens	High	9	2497.3	2581	2835.8	2722.3	2722.5	2494.9	2697.1	2302.2	2576	2718.8
Q9BUV8	C20orf24	Uncharacterized protein C20orf24	Homo sapiens	High	5	694.7	688.3	725.1	654.2	756	701.6	755.4	609.3	717.1	713.9
Q9GZN8	C20orf27	UPF0687 protein C20orf27	Homo sapiens	High	10	2562.6	2438.2	2446.9	2482.9	2537.8	2695.6	2505.1	2484.5	2309.9	2416.7
O43822	C21orf2	Protein C21orf2	Homo sapiens	High	3	51.7	52.3	48	41.4	49.6	52.5	47.7	56.6	57.7	56
P30042	C21orf33	ES1 protein homolog, mitochondrial	Homo sapiens	High	12	2588.7	2860.7	2738.7	2902.6	2727	2512.8	2873.8	2687.3	2753.8	2776
P57076	C21orf59	UPF0769 protein C21orf59	Homo sapiens	High	18	2182.3	1915.7	2313.1	1932.7	2150.6	1949.9	2210.1	1787.4	2192.3	2281.5
Q6P5X5	C22orf39	UPF0545 protein C22orf39	Homo sapiens	High	2	91.3	93.7	113.1	93.3	91.8	98	105.8	83.1	95.1	114.8
O14523	C2CD2L	C2 domain-containing protein 2-like	Homo sapiens	High	3	119.9	115.9	124.7	119.1	116	119.7	108.9	112	102.7	124.5
Q4AC94	C2CD3	C2 domain-containing protein 3	Homo sapiens	High	13	615	624.4	663.5	645	579.6	662.9	663.4	619.3	625.8	649.6
Q86YS7-5	C2CD5	Isoform 5 of C2 domain-containing protein 5	Homo sapiens	Medium	3	48.9	56.6	87.5	61	54.1	56.8	68	47.8	55	70
Q86YS7	C2CD5	C2 domain-containing protein 5	Homo sapiens	High	34	2766.5	2696.8	2941.7	2714.1	2539.8	2705	2793	2697.9	2767.5	2890.5
Q9NWW7	C2orf42	Uncharacterized protein C2orf42	Homo sapiens	High	2	65	62	73.4	61.2	61.5	58.8	62.7	73.6	69.2	68.6
Q8WWC4	C2orf47	m-AAA protease-interacting protein 1, mitochondrial	Homo sapiens	High	10	2332.8	2353.4	2224	2414.9	2352.5	2474.9	2337.1	2467.7	2156.9	2011
Q9BVC5	C2orf49	Ashwin	Homo sapiens	High	12	1065.5	1003.4	858.4	955.7	1047.3	973.2	920.7	1080	951.9	920.2
Q2NKX9	C2orf68	UPF0561 protein C2orf68	Homo sapiens	High	2	198.5	158.6	135.1	178	171.6	172.3	133.1	185	187.3	146.3
Q8N8R5	C2orf69	UPF0565 protein C2orf69	Homo sapiens	High	15	1020.1	1189.4	1394.9	1161.9	1078.9	1376.6	1222.4	1067.8	1001.6	1207.4
A8MZ97	C2orf74	Uncharacterized protein C2orf74	Homo sapiens	High	1	23.5	18.4	16.2	20.5	25.3	25.4	24.5	21.6	25.6	26.3
Q3KRA6	C2orf76	UPF0538 protein C2orf76	Homo sapiens	High	6	572.4	578.4	488.8	597.2	594.7	618.4	540.5	646.8	584.2	516
P01024	C3	Complement C3	Homo sapiens	Medium	1	94.9	104.2	91.6	115.7	145.2	124.7	109.4	126	134.7	77.2
Q5JPI3	C3orf38	Uncharacterized protein C3orf38	Homo sapiens	High	9	946.1	907.3	1015.5	925	973.9	944.6	958.5	879.8	976.2	988.1
Q8NDZ4	C3orf58	Deleted in autism protein 1	Homo sapiens	High	9	998.4	1050	1185.1	1048.7	1066.4	1069	1213.9	1005.3	1076.3	1160
P0C0L4	C4A	Complement C4-A	Homo sapiens	High	2	135.1	135.9	103.2	138.3	180.4	168.1	147.1	153.5	183.6	104.7
Q8N8J7	C4orf32	Uncharacterized protein C4orf32	Homo sapiens	High	3	476.7	441.7	446.7	472.4	535.1	587.2	427.5	446.6	477.5	475.6
Q8N1A6	C4orf33	UPF0462 protein C4orf33	Homo sapiens	High	6	513	503.7	534.3	506.5	497.4	488.8	567.9	494.7	487.1	544.4
Q504U0	C4orf46	Renal cancer differentiation gene 1 protein	Homo sapiens	Medium	1	141.7	83.9	142.3	95.4	121.3	97.7	136.5	96.7	152.7	169.4
Q49AR2	C5orf22	UPF0489 protein C5orf22	Homo sapiens	High	14	1597.1	1463.2	1537.5	1529	1676.8	1605	1417.5	1396.7	1599.3	1659.4
Q7Z6I8	C5orf24	UPF0461 protein C5orf24	Homo sapiens	High	5	477.8	503.6	557.6	494.5	429.2	508.1	492.2	491.2	525.6	528.9
Q96GV9	C5orf30	UNC119-binding protein C5orf30	Homo sapiens	High	3	61.3	75.1	74.6	82	74.3	91.9	70.8	67.7	61.1	70.1
Q96MH7	C5orf34	Uncharacterized protein C5orf34	Homo sapiens	High	4	168.7	106.2	127	113.2	157.4	107.7	118.6	103	166.8	157.1
Q6NTE8	C5orf45	UPF0544 protein C5orf45	Homo sapiens	High	2	39	51.1	49.2	45.8	39.2	71	35.5	29.9	39.3	45.9
A6NDU8	C5orf51	UPF0600 protein C5orf51	Homo sapiens	High	12	1046.3	1019.3	1147.8	1010.4	1016.3	980.6	1112	997.2	1061.6	1107.2
Q9H6K1	C6orf106	Uncharacterized protein C6orf106	Homo sapiens	High	9	603.2	522	584.9	523.9	490.8	514.3	557.8	525.5	591.3	616.1
Q7Z4R8	C6orf120	UPF0669 protein C6orf120	Homo sapiens	High	2	56.8	67.5	93.8	65.8	64.6	75.3	86	53.9	66.7	81.7
Q5SQH8	C6orf136	Uncharacterized protein C6orf136	Homo sapiens	Medium	1	34.5	36.1	31	26	29.1	31.4	25.8	28.6	31	29
Q9P0P8	C6orf203	Uncharacterized protein C6orf203	Homo sapiens	High	4	593.4	570.5	689.1	603	603.7	563.2	634.8	553.9	609.8	678.3
O95873	C6orf47	Uncharacterized protein C6orf47	Homo sapiens	High	5	278.6	273.2	330.5	267.6	244.2	289.9	323.2	288.1	301.2	317.4
Q6UWU4	C6orf89	Bombesin receptor-activated protein C6orf89	Homo sapiens	High	2	895.7	676.4	447.2	772.1	834.9	750.3	594.2	805.3	902.9	702.2
Q9BPX7	C7orf25	UPF0415 protein C7orf25	Homo sapiens	High	10	549.8	570	660.8	612.9	556.5	611.9	644.4	551.5	609.2	596.7
Q96N11	C7orf26	Uncharacterized protein C7orf26	Homo sapiens	High	6	500.8	482.3	395.2	482	501.9	532.5	457.6	504.7	537.9	451
Q8WVR3	C7orf43	Uncharacterized protein C7orf43	Homo sapiens	High	1	29.5	38.6	31	29.4	38.3	38.4	34.1	34.6	31.2	35
Q9BRJ6	C7orf50	Uncharacterized protein C7orf50	Homo sapiens	High	11	1860.5	2054.8	2417.7	1999.5	1883.5	2068.4	2076	1883.2	2010.5	2070.6
Q96HJ9	C7orf55	UPF0562 protein C7orf55	Homo sapiens	High	3	398.6	411.6	287.9	422.8	408.6	433.3	357.3	440.7	397.3	333
Q9H7E9	C8orf33	UPF0488 protein C8orf33	Homo sapiens	High	8	550.8	645	768.9	630.9	592.8	663.2	636.2	568.1	557.8	639.9
Q96NL8	C8orf37	Protein C8orf37	Homo sapiens	High	4	269	259	309.6	247.7	267.7	246.2	275	244.5	277.4	310.1
Q8N0T1	C8orf59	Uncharacterized protein C8orf59	Homo sapiens	High	5	556.2	539.3	442.3	660.9	838	701.4	509.2	636.7	708.6	571.6
Q96K31	C8orf76	Uncharacterized protein C8orf76	Homo sapiens	High	3	442.4	482.9	313.8	457.7	436	430.4	362.1	467.6	391.9	362.2
Q6P1X6	C8orf82	UPF0598 protein C8orf82	Homo sapiens	High	7	731.7	710.5	704.5	716.3	768.4	772.3	719.5	730.5	754	734.7
P0DMB2	C8orf88	Uncharacterized protein C8orf88	Homo sapiens	High	1	195.9	184.8	62.9	220.3	291.4	167.5	121.2	247.8	203.5	114.8
Q5T280	C9orf114	Putative methyltransferase C9orf114	Homo sapiens	High	8	884	916.7	1215.6	899.8	918.8	915.7	1036.9	868.5	915.1	1109.7
Q9BUH6	C9orf142	Protein PAXX	Homo sapiens	High	9	1183.3	1202.1	1150	1151.1	1184.6	1210.1	1046.7	1244.1	1064.7	1082.2
Q9BUW7	C9orf16	UPF0184 protein C9orf16	Homo sapiens	High	1	182.6	175.7	251.3	173.1	145.3	192.7	194	148.2	172.6	232.8
Q8IXQ3	C9orf40	Uncharacterized protein C9orf40	Homo sapiens	High	6	811.5	779.7	830	850	728.1	853.8	763.1	881.1	825.1	791.9
Q5T6V5	C9orf64	UPF0553 protein C9orf64	Homo sapiens	High	13	993.5	1039.3	1204.2	1038.2	1008.5	1083.7	1106	976.2	1035.8	1081.8
Q96LT7	C9orf72	Protein C9orf72	Homo sapiens	High	3	164	158.1	146.2	167	180.7	164.1	139.6	174.2	164	145
Q9NZ63	C9orf78	Uncharacterized protein C9orf78	Homo sapiens	High	21	3617.5	4234.2	4307.8	3834.3	3960.9	3991.4	3969.6	3985.1	3728.8	3950.6
Q96MD7	C9orf85	Uncharacterized protein C9orf85	Homo sapiens	High	2	278.7	265	176.1	300.2	250.4	276.6	219	316.3	305.4	223
P35219	CA8	Carbonic anhydrase-related protein	Homo sapiens	High	5	477.2	591.6	542.5	585.2	459	555.8	533	565.7	488.7	518.6
Q16790	CA9	Carbonic anhydrase 9	Homo sapiens	High	4	291.3	306.9	316.4	257.4	188.1	230.3	257.2	256.4	234.9	274.6
Q9H8G2	CAAP1	Caspase activity and apoptosis inhibitor 1	Homo sapiens	High	8	474.7	513.3	518.5	492.7	471.8	553.4	506.5	487.7	502.6	536.9
Q9Y376	CAB39	Calcium-binding protein 39	Homo sapiens	High	24	5567.3	5208.3	5160.4	5138.7	5398.2	5060.8	5215.2	5250.1	5540.4	5194
Q9Y6J0	CABIN1	Calcineurin-binding protein cabin-1	Homo sapiens	High	39	3130.7	3212.8	3493.5	3151.2	2726.5	2912.7	2770.5	2797	3031	2957.7
Q8TDN4	CABLES1	CDK5 and ABL1 enzyme substrate 1	Homo sapiens	Medium	1	60.7	55.5	54.1	50.8	42.1	47.9	66.6	47.7	55	56.3
Q9BTV7	CABLES2	CDK5 and ABL1 enzyme substrate 2	Homo sapiens	High	6	395.8	349.6	322.7	355.3	351.8	341.9	369.9	386.2	380.7	379
Q8WUQ7	CACTIN	Cactin	Homo sapiens	High	23	2322.2	2577	2434.4	2599.2	2380.3	2783	2332.4	2518.9	2305.6	2366
Q86Y37	CACUL1	CDK2-associated and cullin domain-containing protein 1	Homo sapiens	High	7	727.3	758.6	827.1	786.2	762.2	838.3	815	751.4	766.6	782.5
Q9HB71	CACYBP	Calcyclin-binding protein	Homo sapiens	High	24	6576	7437.4	6366.6	6786.4	7058.1	6630.5	6608.9	7319.7	6749.6	6993.2
P27708	CAD	CAD protein	Homo sapiens	High	87	13474	13038.8	13295.6	13457.7	13357.7	13348.9	12567.6	13075.9	13306	12835.7
Q9P1Z2	CALCOCO1	Calcium-binding and coiled-coil domain-containing protein 1	Homo sapiens	High	8	645.9	616.3	612.6	610.2	625.9	653.9	633.5	647	645.1	604
Q13137	CALCOCO2	Calcium-binding and coiled-coil domain-containing protein 2	Homo sapiens	High	20	2142	2422.9	2481.4	2355.7	2584.3	2490.3	2161	2224.9	2179.4	2373.2
Q16602	CALCRL	Calcitonin gene-related peptide type 1 receptor	Homo sapiens	High	1	65.9	53	118.3	47.3	54.5	49	93.9	42.5	66.9	96.5
P62158	CALM1	Calmodulin	Homo sapiens	High	13	3208.6	3580.8	3803.7	3477.7	3262.1	2774.9	3773.5	2805.2	3611	3530
Q9NZT1	CALML5	Calmodulin-like protein 5	Homo sapiens	High	1	6.9	11.8	7.3	9.3	8.2	14.6	21.7	18.9	12	6.9
P27797	CALR	Calreticulin	Homo sapiens	High	44	13969.3	15203.6	13215.3	16104	14569.8	13595.5	13164.1	14213.5	15674.9	14202.8
O43852-4	CALU	Isoform 4 of Calumenin	Homo sapiens	High	5	631.1	786	745	745.2	628.9	710.5	669.8	739	625.9	712.2
O43852	CALU	Calumenin	Homo sapiens	High	21	3563.6	3657.7	4508.2	3515.1	3511.7	3534	3874.5	3253.8	3483.5	3910.2
Q8IU85	CAMK1D	Calcium/calmodulin-dependent protein kinase type 1D	Homo sapiens	High	10	438.7	471	391.3	443.9	415.8	480.3	400	455.1	428.3	410.4
Q9UQM7	CAMK2A	Calcium/calmodulin-dependent protein kinase type II subunit alpha	Homo sapiens	High	1	17.4	19.3	23.9	16.4	15.3	15.1	14.6	19	20.4	16.6
Q13557	CAMK2D	Calcium/calmodulin-dependent protein kinase type II subunit delta	Homo sapiens	High	9	627.9	688.4	675.7	663.7	586.4	650.7	674.7	686.7	622.4	680.9
Q13555	CAMK2G	Calcium/calmodulin-dependent protein kinase type II subunit gamma	Homo sapiens	High	11	1879.7	1798.9	1847	1777.6	1774.3	1735	1960.5	1866	1783.2	1790.2
Q8N5S9	CAMKK1	Calcium/calmodulin-dependent protein kinase kinase 1	Homo sapiens	High	7	430	434.5	380.7	438.4	490.3	416	402.8	463.5	457.5	422.2
Q96RR4	CAMKK2	Calcium/calmodulin-dependent protein kinase kinase 2	Homo sapiens	High	11	1002.3	938.3	1067.8	967.5	970	993.1	1091.3	919.8	1000.1	1048.1
Q7Z624	CAMKMT	Calmodulin-lysine N-methyltransferase	Homo sapiens	High	4	256.8	278.6	265.6	283.7	234.6	287.9	267.5	261.9	224.3	262.6
Q8NCB2	CAMKV	CaM kinase-like vesicle-associated protein	Homo sapiens	High	7	223.6	246.3	272.2	241.8	235.9	230.1	236.4	204.9	230.1	242.8
P49069	CAMLG	Calcium signal-modulating cyclophilin ligand	Homo sapiens	High	5	268.6	240.1	174.8	250.9	267.2	252.5	206.7	253.1	258.6	227.9
Q5T5Y3	CAMSAP1	Calmodulin-regulated spectrin-associated protein 1	Homo sapiens	High	39	2875.7	2953.8	3284.5	2944.1	2840.4	3107.5	3035	2855	2985.5	3259
Q86VP6	CAND1	Cullin-associated NEDD8-dissociated protein 1	Homo sapiens	High	61	15568.7	15621.5	15312.8	15321.8	15093.7	15096.2	15894.1	15659.4	14935.8	15068.3
Q8WVQ1	CANT1	Soluble calcium-activated nucleotidase 1	Homo sapiens	High	15	1069	1176.6	1171.6	1297.8	1117	1240.6	1196	1248.9	1097.3	1171.8
P27824	CANX	Calnexin	Homo sapiens	High	45	11029.2	12039.6	10697.9	11297.7	11732.1	10904.2	11499.7	11765.1	10996.1	11203.1
Q01518	CAP1	Adenylyl cyclase-associated protein 1	Homo sapiens	High	34	10500.8	10100.9	8781.1	10184	9901.1	9428.6	10059.8	11014.1	9724.7	9292
P40121	CAPG	Macrophage-capping protein	Homo sapiens	High	11	1508	1406.1	1945.3	1398.5	1571.4	1370.4	1712.9	1333.7	1522.2	1797.2
P07384	CAPN1	Calpain-1 catalytic subunit	Homo sapiens	High	40	5965	6374.8	6036.1	6329.7	5913.5	6483.1	6055.1	6330	6042.7	5838.4
O15484	CAPN5	Calpain-5	Homo sapiens	High	4	145.5	130.9	122.5	134.1	141.9	134.2	143.1	138.5	141.1	141.6
Q9Y6W3	CAPN7	Calpain-7	Homo sapiens	High	26	2348.3	2702.1	2664.3	2598.6	2556.7	2763	2561.2	2565.8	2346.2	2549.8
P04632	CAPNS1	Calpain small subunit 1	Homo sapiens	High	11	2104.7	2054.9	2208.7	2192	2170	2160.6	2104.9	2008.3	2138.1	2200
Q14444	CAPRIN1	Caprin-1	Homo sapiens	High	19	5962.8	6047.6	7255.3	6038.7	5903.6	5624.2	7295.4	5974.6	6134.5	6631.9
P52907	CAPZA1	F-actin-capping protein subunit alpha-1	Homo sapiens	High	13	4301.4	4047.3	3861.6	4123.5	4278	3773.9	3850.4	4185.8	4348.5	4120.9
P47755	CAPZA2	F-actin-capping protein subunit alpha-2	Homo sapiens	High	11	1792.6	1633.4	1740.1	1614	1708.1	1609.5	1754.2	1634.4	1680.5	1787.4
P47756	CAPZB	F-actin-capping protein subunit beta	Homo sapiens	High	17	3500.9	3742.4	4169.8	3576.3	3513.7	3622.8	3941.8	3824.7	3443	3759.3
Q9BXL7	CARD11	Caspase recruitment domain-containing protein 11	Homo sapiens	High	6	397.4	286.1	257.4	321.3	369.5	317.9	323.2	319.3	408.2	339.4
Q5EG05	CARD16	Caspase recruitment domain-containing protein 16	Homo sapiens	High	1	169.5	159.2	161.8	166.9	140.8	174.5	150.5	119.6	150.9	148.2
Q96LW7	CARD19	Caspase recruitment domain-containing protein 19	Homo sapiens	High	2	124.9	138.8	120	135.2	135.9	163.4	116	135.3	141.2	134.4
Q9Y2G2	CARD8	Caspase recruitment domain-containing protein 8	Homo sapiens	High	8	678.3	721.5	604.3	701.5	730	713.3	598.2	847.9	717.9	678.9
Q9Y2V2	CARHSP1	Calcium-regulated heat-stable protein 1	Homo sapiens	High	8	1638	1509.6	1407.7	1474	1491.2	1564.6	1398.8	1591.7	1436.4	1476.6
Q86X55	CARM1	Histone-arginine methyltransferase CARM1	Homo sapiens	High	18	2223.8	2020.7	2305.2	2088	2161.3	2105.5	2432.1	2056.7	2224.2	2210.2
Q6F5E8	CARMIL2	Capping protein, Arp2/3 and myosin-I linker protein 2	Homo sapiens	High	22	1120.3	1114.5	1282.6	1144.8	1110.7	1192.6	1124.4	1139	1130.6	1201.2
Q8N4J0	CARNMT1	Carnosine N-methyltransferase	Homo sapiens	High	10	955.6	907	871.6	946	955	861.8	880.5	948	1009.6	874.6
P49589	CARS	Cysteine--tRNA ligase, cytoplasmic	Homo sapiens	High	40	5178.5	5371.4	5537.9	5238.9	5299.7	5349.3	5305.9	5172	5160.4	5425.1
P49589-3	CARS	Isoform 3 of Cysteine--tRNA ligase, cytoplasmic	Homo sapiens	High	12	1267.5	1189.9	1142.7	1185.7	1197.8	1158.5	1144.6	1178.1	1147.3	1192.4
Q9HA77	CARS2	Probable cysteine--tRNA ligase, mitochondrial	Homo sapiens	High	13	1185.1	1224.8	1191.7	1237.8	1273.8	1244.6	1282.4	1242.2	1164.5	1189.6
O15234	CASC3	Protein CASC3	Homo sapiens	High	12	869.3	984.2	975.8	967.1	1051.3	1047.6	947.8	934.9	876.9	982.5
Q6P4E1	CASC4	Protein CASC4	Homo sapiens	High	9	707.6	786.1	897.1	790.4	757.1	830	840.9	764.8	752.2	851.6
Q8NG31	CASC5	Protein CASC5	Homo sapiens	High	85	7238.3	7096.4	7468.4	6966.1	8529.6	7499.4	7324.9	7154.4	7075	7479.4
O14936	CASK	Peripheral plasma membrane protein CASK	Homo sapiens	High	3	135.6	138.8	197.6	150.6	155.7	152.7	152.1	157.6	144.1	174.4
P29466	CASP1	Caspase-1	Homo sapiens	High	4	195.9	182.3	160.3	162.1	180.6	171.9	169.7	180.9	177.7	182.5
Q92851	CASP10	Caspase-10	Homo sapiens	High	4	166.5	135.5	129.8	144.1	129.6	158.5	142	157.8	137.4	128.1
P31944	CASP14	Caspase-14	Homo sapiens	High	3	266.6	324.5	205.8	300.8	300.5	537.4	402.6	305.6	326.1	303.7
P42575	CASP2	Caspase-2	Homo sapiens	High	18	2200.9	2280.5	2325	2271.2	2144.3	2233.5	2245.2	2365.3	2268.2	2278.1
P42574	CASP3	Caspase-3	Homo sapiens	High	12	2882.4	2737	3154	2791.9	2893.2	2700.3	2974.7	2898.5	2914.3	3061.8
P49662	CASP4	Caspase-4	Homo sapiens	High	3	185.3	196.2	204.2	219.1	185.9	232	173.6	209.2	176.8	187.8
P55212	CASP6	Caspase-6	Homo sapiens	High	17	4387.8	3877.7	3616.3	4040	4176.8	3941.2	3799.4	4050.7	4286.9	4111
P55210	CASP7	Caspase-7	Homo sapiens	High	10	1265.2	1382.2	1309.6	1345.8	1282.7	1455.8	1300.3	1344.2	1264.7	1348.5
Q14790	CASP8	Caspase-8	Homo sapiens	High	19	1897.6	1796.2	1669.5	1802.2	1804.4	1754	1781.2	1856.5	1811.5	1807.4
Q9UKL3	CASP8AP2	CASP8-associated protein 2	Homo sapiens	High	52	4279.4	4331.9	4626.4	4490.1	3543.9	4551.9	4374.1	4478.4	4333	4639.5
P55211	CASP9	Caspase-9	Homo sapiens	High	5	152	142.9	161.8	153.5	149.7	143.2	171.3	160.7	165.3	176.7
P20810	CAST	Calpastatin	Homo sapiens	High	8	588	693.4	622.2	647.5	513.3	715.1	559.9	602.8	555.8	623.3
O43439	CBFA2T2	Protein CBFA2T2	Homo sapiens	High	13	1122.2	1122.7	1361.7	1143.7	1150	1290.4	1106.6	1123.6	1166.2	1306.8
O75081	CBFA2T3	Protein CBFA2T3	Homo sapiens	High	13	895	910.7	963.9	897.3	800	958	875.8	876.2	943.5	1043.1
Q13951	CBFB	Core-binding factor subunit beta	Homo sapiens	High	16	2513.5	2259.4	2649.9	2333.5	2208.4	1992.7	2265.1	1903	1767.9	2213.9
Q13951-2	CBFB	Isoform 2 of Core-binding factor subunit beta	Homo sapiens	High	3	71.9	83.3	76.6	64.3	65.9	67.4	60.3	54	59.5	33.5
P22681	CBL	E3 ubiquitin-protein ligase CBL	Homo sapiens	High	17	2955.6	2975.4	3045.8	3055.7	2845.2	3278	2858.9	3022.4	2862.1	3082.1
Q13191	CBLB	E3 ubiquitin-protein ligase CBL-B	Homo sapiens	High	7	294.7	278.5	309.4	305.8	248	294.4	302.8	290.4	286.7	308
Q75N03	CBLL1	E3 ubiquitin-protein ligase Hakai	Homo sapiens	High	12	1241.2	1189.2	1436.9	1181.6	1207.7	1185.1	1397.7	1155.2	1273.6	1390.8
Q75N03-2	CBLL1	Isoform 2 of E3 ubiquitin-protein ligase Hakai	Homo sapiens	Medium	1	29.2	33	28.3	22.3	34.7	29.6	27	26.5	30.6	30.3
Q8N4T8	CBR4	Carbonyl reductase family member 4	Homo sapiens	High	9	1187.7	1118.9	1169.6	1092.4	1191.2	1029.2	1205.8	1162	1185.3	1261.5
Q9BRT8	CBWD1	COBW domain-containing protein 1	Homo sapiens	High	2	249.2	227.8	291.1	212.4	280.8	245.4	293.2	215.7	246.6	282.4
Q5JTY5	CBWD3	COBW domain-containing protein 3	Homo sapiens	High	2	1437.8	1518.8	1543.6	1558.8	1543.4	1627.2	1512.3	1510.1	1459.4	1578
P83916	CBX1	Chromobox protein homolog 1	Homo sapiens	High	13	4141.9	4596.6	4485.2	4430.7	4391.3	4194.7	4767.1	4424.3	4144	4338
Q14781	CBX2	Chromobox protein homolog 2	Homo sapiens	High	14	840.8	808.8	790.3	785.7	778.8	790	830.7	829.4	834.8	816.6
Q13185	CBX3	Chromobox protein homolog 3	Homo sapiens	High	11	2341.6	3426.5	2386.3	3464.5	2471.3	2610.6	2401.4	2836.8	2779.8	2608
O00257	CBX4	E3 SUMO-protein ligase CBX4	Homo sapiens	High	20	2353.7	2246.3	1967	2317.1	1933.8	2238	2135.4	2244.8	2438.7	2098.7
P45973	CBX5	Chromobox protein homolog 5	Homo sapiens	High	12	5059.2	5845	5718.2	5585.8	4615.2	5533	5555.1	5572.3	4862.4	5469.2
Q9HC52	CBX8	Chromobox protein homolog 8	Homo sapiens	High	15	1654.1	1499.8	2201.9	1512.7	1601.3	1571.7	1919.9	1402.4	1900.1	2036.7
Q6P1N0	CC2D1A	Coiled-coil and C2 domain-containing protein 1A	Homo sapiens	High	25	2373.7	2483.2	2420.3	2462.9	2424.1	2484.8	2464.8	2514.2	2458.8	2579.2
Q5T0F9	CC2D1B	Coiled-coil and C2 domain-containing protein 1B	Homo sapiens	High	14	906	863	897.4	872	906.6	960.5	861.5	846.1	968.6	940.7
Q8IX12	CCAR1	Cell division cycle and apoptosis regulator protein 1	Homo sapiens	High	46	8378.4	8616.8	8245.1	8331.7	8428.2	8442.1	8324.9	8529.2	7966.6	8166.1
Q8N163	CCAR2	Cell cycle and apoptosis regulator protein 2	Homo sapiens	High	49	8748.1	8513.4	8904.7	8272.8	8797.9	8293.1	8883.9	8371.3	8260.2	8462.5
Q96A19	CCDC102A	Coiled-coil domain-containing protein 102A	Homo sapiens	High	2	54.7	88.5	69.8	96.2	58.4	71.2	68.4	76.3	72.3	68.7
Q96NT0	CCDC115	Coiled-coil domain-containing protein 115	Homo sapiens	High	5	256.5	258.3	351.6	267.2	305.2	291.8	298.5	256.7	271.4	324.2
Q8IWD4	CCDC117	Coiled-coil domain-containing protein 117	Homo sapiens	High	8	666.4	665.1	622.4	650.6	618	664.5	564.3	656.8	612	574.7
Q8WUD4	CCDC12	Coiled-coil domain-containing protein 12	Homo sapiens	High	8	1803.7	1784.1	1680.7	1795.9	1717.5	1767.2	1844.8	1772.5	1776	1843.1
Q96HB5	CCDC120	Coiled-coil domain-containing protein 120	Homo sapiens	High	2	68.4	61.4	98.4	58.6	55.1	66.5	79.7	74.8	67.5	85.9
Q96CT7	CCDC124	Coiled-coil domain-containing protein 124	Homo sapiens	High	20	2753	2712.9	2691.4	2518.3	2861.4	2533.9	2498.5	2606.5	2498.2	2376.8
Q96BQ5	CCDC127	Coiled-coil domain-containing protein 127	Homo sapiens	High	4	486.9	481.3	582.7	473.5	502.6	453.6	534.6	420.5	543.8	552.1
P13994	CCDC130	Coiled-coil domain-containing protein 130	Homo sapiens	High	8	475.1	516.1	484	507.2	480	520.4	471.8	524.6	511	507.6
Q9H6E4	CCDC134	Coiled-coil domain-containing protein 134	Homo sapiens	High	10	1212.5	1393.2	1299.1	1430.5	1151.7	1475.4	1346.6	1360	1130.7	1169.2
Q6PK04	CCDC137	Coiled-coil domain-containing protein 137	Homo sapiens	High	8	728.8	910.2	816.9	935.8	598.2	1003.5	802.3	910.4	741.5	785.9
Q96M89	CCDC138	Coiled-coil domain-containing protein 138	Homo sapiens	High	8	511.7	602.5	563.8	648.4	492.1	645.3	596.2	609.1	547.6	557.8
Q49A88	CCDC14	Coiled-coil domain-containing protein 14	Homo sapiens	High	10	1085.7	1025.5	874.9	1072.6	772.3	1003.2	947.2	1089.5	1073.7	897.8
Q6ZP82	CCDC141	Coiled-coil domain-containing protein 141	Homo sapiens	Medium	3	249.6	195.8	172.1	198.2	279.9	217.9	229	207.9	283.4	239.5
Q6ZUS6	CCDC149	Coiled-coil domain-containing protein 149	Homo sapiens	Medium	1	59.1	64.6	61.5	53.6	61.1	46.1	56.7	57.2	66.4	69.5
Q0P6D6	CCDC15	Coiled-coil domain-containing protein 15	Homo sapiens	High	10	466.7	456.8	623.2	470.8	368.7	476.5	541.8	424.3	467.9	496.7
Q9P0B6	CCDC167	Coiled-coil domain-containing protein 167	Homo sapiens	High	3	304.3	336.8	307.7	321.6	317.4	331.5	312.9	344.3	315	245.8
Q6TFL3	CCDC171	Coiled-coil domain-containing protein 171	Homo sapiens	High	3	388.3	523.2	492.3	521.6	341.1	632.6	382.3	386.2	327.5	416.8
Q6PII3	CCDC174	Coiled-coil domain-containing protein 174	Homo sapiens	High	13	1076.2	1041.9	1020.2	1040.9	1080.1	1057.2	1042.1	1082.6	1082.3	1063.4
Q5T9S5	CCDC18	Coiled-coil domain-containing protein 18	Homo sapiens	High	14	1054.6	1059.7	1231.9	1037.9	996	1032.8	1063.6	949.7	1088	1211.2
Q7Z3E2	CCDC186	Coiled-coil domain-containing protein 186	Homo sapiens	High	24	1542.6	1563.9	1848.5	1574.6	1603.4	1555.7	1695.6	1551.5	1594.5	1798
Q8NCU4	CCDC191	Coiled-coil domain-containing protein 191	Homo sapiens	High	3	175.6	166.8	213	156	181.4	139.1	201.7	142.2	183.5	179.8
O60826	CCDC22	Coiled-coil domain-containing protein 22	Homo sapiens	High	23	2456.8	2482.1	2495.9	2571	2392.7	2545.6	2383.7	2441.3	2443.1	2539.9
Q86WR0	CCDC25	Coiled-coil domain-containing protein 25	Homo sapiens	High	17	4015	4095.7	3978.9	4088.7	4084.4	4179.8	4136.3	4153.7	3950.2	3927.7
Q8IWP9	CCDC28A	Coiled-coil domain-containing protein 28A	Homo sapiens	High	3	131.2	131.5	129.8	123.5	130.7	158.1	125.3	128.4	115	144.3
Q9BUN5	CCDC28B	Coiled-coil domain-containing protein 28B	Homo sapiens	High	1	26.1	28.4	30.8	31.2	25.9	33	27.1	28.2	24.4	36.9
Q9UFE4	CCDC39	Coiled-coil domain-containing protein 39	Homo sapiens	Medium	2	178.9	156.6	201.7	144.7	180.3	157.1	200.5	153.5	199.1	215.3
Q96MW1	CCDC43	Coiled-coil domain-containing protein 43	Homo sapiens	High	10	950.5	1052.6	1123.8	982.8	1074.5	979.4	1042.6	1013.6	969.7	1139.9
Q96A33	CCDC47	Coiled-coil domain-containing protein 47	Homo sapiens	High	20	3947.1	4152.1	4223.1	4066	4419	4328.5	3976.3	3981.2	3929.8	4209.1
Q96ER9	CCDC51	Coiled-coil domain-containing protein 51	Homo sapiens	High	12	1565.9	1576.5	1624.6	1570.7	1692.3	1575.8	1574.1	1564.2	1615.3	1590.5
Q9Y3C0	CCDC53	WASH complex subunit CCDC53	Homo sapiens	High	5	1095.8	1060.7	1068.8	1062.3	1068.7	1069.1	1130.3	1113.6	1073.4	1083.8
Q4VC31	CCDC58	Coiled-coil domain-containing protein 58	Homo sapiens	High	8	1275.5	1565.6	1150.6	1546.8	1369.2	1610.1	1162.5	1558.3	1258.7	1181.6
Q9P031	CCDC59	Thyroid transcription factor 1-associated protein 26	Homo sapiens	High	13	1191.4	1171.1	1209.8	1191.2	905.8	1290.2	1203.8	1263.8	1265.2	1231.9
Q16204	CCDC6	Coiled-coil domain-containing protein 6	Homo sapiens	High	20	3975.5	4310.9	4568	4333.3	4020.9	4473.2	4198.4	4133.8	3968.6	4310.7
Q9Y6R9	CCDC61	Coiled-coil domain-containing protein 61	Homo sapiens	High	3	190.8	214.6	186.4	203.1	124.6	258.4	169.8	182.6	173.8	200.5
Q8IXS2	CCDC65	Coiled-coil domain-containing protein 65	Homo sapiens	Medium	1	92.9	76.5	74.5	84.9	99.7	75.9	91.1	81.7	103	92.4
A2RUB6	CCDC66	Coiled-coil domain-containing protein 66	Homo sapiens	High	6	252.4	247.4	218.6	264.4	271	248.6	266.3	272.9	266	255
Q8IV32	CCDC71	Coiled-coil domain-containing protein 71	Homo sapiens	High	3	149.4	139.7	126.9	146.9	103.5	139.1	152.3	141.5	146.1	146.9
Q8N9Z2	CCDC71L	Coiled-coil domain-containing protein 71L	Homo sapiens	High	3	204.3	242.8	228.4	233.1	181.3	237.1	242.2	229.7	219.2	244.5
Q9BR77	CCDC77	Coiled-coil domain-containing protein 77	Homo sapiens	High	12	999.8	937.8	836.1	953.3	736.6	1015.5	914.3	951.6	1004.3	884.6
Q8N4S0	CCDC82	Coiled-coil domain-containing protein 82	Homo sapiens	High	13	1001.4	1062.7	1006.4	1027.2	785.3	992.9	902.6	960.2	978.8	1005.9
Q8IWF9	CCDC83	Coiled-coil domain-containing protein 83	Homo sapiens	Medium	1	13.7	14.2	16.3	13.3	8.6	13.2	16	12.6	13	13.7
Q86UT8	CCDC84	Coiled-coil domain-containing protein 84	Homo sapiens	High	4	239.3	234.5	239.4	218.3	248.4	225.9	223.8	234.4	244.1	260.4
Q15834	CCDC85B	Coiled-coil domain-containing protein 85B	Homo sapiens	High	1	89.3	82.2	82.2	89	98	89.3	83.7	81.3	90.7	86.4
A6NKD9	CCDC85C	Coiled-coil domain-containing protein 85C	Homo sapiens	High	13	917.5	949.9	1045.6	954.1	952.4	984.2	952.7	896.7	968.6	976.4
Q9H6F5	CCDC86	Coiled-coil domain-containing protein 86	Homo sapiens	High	16	2161.7	2065.8	2173.7	2170.8	1948.9	2102.9	2118.9	2145.5	2161.8	2225.2
Q9NVE4	CCDC87	Coiled-coil domain-containing protein 87	Homo sapiens	Medium	1	116.5	117.2	91.4	107	102.8	96	103.6	129.8	103.9	94.4
Q3V6T2	CCDC88A	Girdin	Homo sapiens	High	72	7036.7	7249.1	7861.2	7062.6	6386.5	7284.2	7338.1	6815	7067.6	7493.7
Q9P219	CCDC88C	Protein Daple	Homo sapiens	High	55	4487.2	4957.1	5260.4	4901.6	4354.3	5159.2	4904.4	4739.2	4571.6	5055.6
Q9Y3X0	CCDC9	Coiled-coil domain-containing protein 9	Homo sapiens	High	10	1071.1	1176.4	1255.4	1158.2	1157.8	1216.1	1118.7	1112	1103.7	1155
Q9GZT6	CCDC90B	Coiled-coil domain-containing protein 90B, mitochondrial	Homo sapiens	High	12	1600.8	1571.7	1760	1510.2	1733.6	1549	1702	1460	1610.9	1696.4
Q7Z6B0	CCDC91	Coiled-coil domain-containing protein 91	Homo sapiens	High	22	2932.8	3010.6	3127.2	2999.1	2939.6	3027.8	2803.6	2622.2	2856.3	3100.2
Q53HC0	CCDC92	Coiled-coil domain-containing protein 92	Homo sapiens	High	4	353.3	482.8	442.8	454.9	285.3	494.8	390.9	462.9	348.6	374.9
Q567U6	CCDC93	Coiled-coil domain-containing protein 93	Homo sapiens	High	33	4033.1	3853.2	4042.3	3859.3	3878.8	3870.5	3891.8	3887.8	3995.4	3990.8
Q9BW85	CCDC94	Coiled-coil domain-containing protein 94	Homo sapiens	High	15	1764.3	1961.8	2188.6	1884.2	1972.4	1914.8	2003.5	1873.2	1850.6	2074
Q96F63	CCDC97	Coiled-coil domain-containing protein 97	Homo sapiens	High	9	585.4	573.3	730.2	595.8	586.8	589.9	588.7	554.6	575.8	665
Q8TD31	CCHCR1	Coiled-coil alpha-helical rod protein 1	Homo sapiens	High	5	500	541.2	341.5	606.8	427.2	642.7	372.1	552.5	439.6	372.2
Q9BSQ5	CCM2	Cerebral cavernous malformations 2 protein	Homo sapiens	High	14	1077.7	1143.2	1181.2	1099	979.5	1064.6	1161.1	1085.9	1136.8	1176.5
P20248	CCNA2	Cyclin-A2	Homo sapiens	High	10	1565.5	1539.2	1690.4	1697.5	1276.7	1765.8	1746.5	1717.6	1648.4	1698.4
P14635	CCNB1	G2/mitotic-specific cyclin-B1	Homo sapiens	High	13	1958.3	1915.2	2056.5	2104.7	3344.3	2440.3	2168.4	2192.8	2197.6	2201.2
O95067	CCNB2	G2/mitotic-specific cyclin-B2	Homo sapiens	High	18	2013.4	1891.8	1891	2004	2476.3	2179.4	1907.1	2009.3	2080.2	1953.9
Q8WWL7	CCNB3	G2/mitotic-specific cyclin-B3	Homo sapiens	High	2	200.1	148.2	117.1	147.5	216.4	166.2	137.5	172.7	230.6	181.9
P24863	CCNC	Cyclin-C	Homo sapiens	High	6	370.5	383.9	404	358.2	373.3	378.3	429.8	394.6	401.8	384.7
P30281	CCND3	G1/S-specific cyclin-D3	Homo sapiens	High	7	484.3	472.5	564.8	490.8	361.2	468.9	540.4	524.3	544.1	551.1
O95273	CCNDBP1	Cyclin-D1-binding protein 1	Homo sapiens	High	9	1127	1061.4	1165.6	1126.5	1471.9	1228.1	1249.3	1152.4	1230.4	1314.3
O96020	CCNE2	G1/S-specific cyclin-E2	Homo sapiens	High	7	284.2	352.4	422.1	365.1	207.4	371.6	365.1	323.4	379.8	350.2
P41002	CCNF	Cyclin-F	Homo sapiens	High	7	229.7	262.6	304.2	270.8	298.5	289.7	295.5	272.9	266.7	290.6
P51946	CCNH	Cyclin-H	Homo sapiens	High	13	1286.9	1196.8	1443.4	1238.7	1381.9	1266.5	1363.7	1215	1334.1	1403.3
Q14094	CCNI	Cyclin-I	Homo sapiens	Medium	1	130.3	106.7	83.1	103.9	73.1	138.1	108.1	112	130.3	103.6
O75909	CCNK	Cyclin-K	Homo sapiens	High	12	1638.6	1557.1	1777.2	1683.5	1591.9	1764.6	1600.3	1520.7	1714.4	1728.3
Q9UK58	CCNL1	Cyclin-L1	Homo sapiens	High	8	1548.9	1479.1	1183.9	1529.2	1640.6	1483.4	1301.9	1694.9	1514.5	1290.7
Q96S94	CCNL2	Cyclin-L2	Homo sapiens	High	5	685.6	772.1	770.4	765.1	789	838.8	729.4	716	705.9	831.1
O60563	CCNT1	Cyclin-T1	Homo sapiens	High	21	3692.9	3830.5	3762.2	3856.3	3739.2	4019.5	3632.1	3952.2	3770.8	3690.2
O60583	CCNT2	Cyclin-T2	Homo sapiens	High	8	745.7	754.4	726	794.3	796	855	791.1	808.2	782.2	838.1
Q8ND76	CCNY	Cyclin-Y	Homo sapiens	High	10	1441.9	1613.2	1510.9	1533.4	1359.4	1614.1	1437.7	1479.3	1410.3	1472.9
Q8N7R7	CCNYL1	Cyclin-Y-like protein 1	Homo sapiens	High	1	70.4	103.3	83.5	107.5	79.8	105.4	78.6	107.4	73.7	75.4
O43303	CCP110	Centriolar coiled-coil protein of 110 kDa	Homo sapiens	High	27	2705.5	2996	2912.1	2989.2	1732.5	2992.9	2788.2	2841.5	2619.8	2917.9
Q9ULG6	CCPG1	Cell cycle progression protein 1	Homo sapiens	High	2	31.9	31.5	64.7	36.6	34.3	18.9	46.8	33.9	35.9	43
P51679	CCR4	C-C chemokine receptor type 4	Homo sapiens	High	2	235.7	286.9	150	268.6	222.8	261.3	224	328.7	239.5	169.1
P32248	CCR7	C-C chemokine receptor type 7	Homo sapiens	Medium	1	177.3	201.5	90.9	216.1	148.8	185.6	117.7	226.9	151.5	123.1
O00421	CCRL2	C-C chemokine receptor-like 2	Homo sapiens	High	4	556.9	558.8	442.6	526.2	512.5	541.1	489.3	588.9	524.6	440.5
O14618	CCS	Copper chaperone for superoxide dismutase	Homo sapiens	High	9	748.7	725.8	694	686.6	702.5	697	704.4	751.3	657	740.2
Q6IQ19	CCSAP	Centriole, cilia and spindle-associated protein	Homo sapiens	Medium	1	94.8	94.1	105.4	90.1	104.6	92.6	93.1	102	114.4	112.4
Q9H7U1	CCSER2	Serine-rich coiled-coil domain-containing protein 2	Homo sapiens	High	4	149.3	155.7	157.5	156.6	130.9	168.5	168.6	151.5	155	171.1
Q4G0I0	CCSMST1	Protein CCSMST1	Homo sapiens	High	4	254.2	222.1	213.9	211.3	267	257.3	201.3	240.6	232.5	195.3
P78371	CCT2	T-complex protein 1 subunit beta	Homo sapiens	High	45	18610.8	18548.3	19277.2	18380.2	19369.8	18103.4	18465.9	18305.5	18193.5	18929.3
P49368	CCT3	T-complex protein 1 subunit gamma	Homo sapiens	High	48	12960.1	13201.8	14844.3	12988.2	13659.2	13251.6	14036.3	13296.7	12666.7	13731.4
P50991	CCT4	T-complex protein 1 subunit delta	Homo sapiens	High	36	10088.4	9820.1	9972.6	9774.3	10499	9815.6	9989.3	10036.1	9721.4	10129.8
P48643	CCT5	T-complex protein 1 subunit epsilon	Homo sapiens	High	41	21829.6	22845.6	23703	22314.4	22878.4	21551.6	24189.3	21894.5	21381.5	22815.5
P40227	CCT6A	T-complex protein 1 subunit zeta	Homo sapiens	High	37	9743.1	10013.2	10024.8	10133.6	10001.7	10123.9	10125.2	9947.3	9539.7	9996
Q99832	CCT7	T-complex protein 1 subunit eta	Homo sapiens	High	46	14887.9	14609.2	13963	15180.2	15214.4	14867	14498.1	14824	14728.1	14270.7
P50990	CCT8	T-complex protein 1 subunit theta	Homo sapiens	High	53	27087.6	27054.7	26977.8	27134	27726.3	25249.8	26913.3	26481.4	27218.2	27551.7
P86790	CCZ1B	Vacuolar fusion protein CCZ1 homolog B	Homo sapiens	High	24	2056.7	2015.9	2134	2081.4	2122	2215.3	2116.3	2099	2121.2	2130.3
P48509	CD151	CD151 antigen	Homo sapiens	High	2	79.2	93.7	100.5	75.4	68.8	70.9	127.6	73.5	93.2	80.9
Q15762	CD226	CD226 antigen	Homo sapiens	High	3	190.1	217.3	242.3	232.1	210.6	232.1	227	211.3	197.9	227.1
P20963	CD247	T-cell surface glycoprotein CD3 zeta chain	Homo sapiens	High	8	1611.2	1767	1807.8	1751	1507.1	1862.2	1620.3	1523.8	1594.3	1747.8
Q9Y5K6	CD2AP	CD2-associated protein	Homo sapiens	High	43	8511.6	8732.8	7634.8	8426.5	8282.3	8616.2	7945.6	8747.1	7912.4	8163.1
O95400	CD2BP2	CD2 antigen cytoplasmic tail-binding protein 2	Homo sapiens	High	15	750.9	724.5	731.7	754.9	744.1	720	720.4	719.4	708	720.5
Q9NPF0	CD320	CD320 antigen	Homo sapiens	High	4	812.1	607.3	1025.6	663.1	819.1	580.4	843	555.5	810.2	965.4
P11049	CD37	Leukocyte antigen CD37	Homo sapiens	High	5	386.6	444.5	548.1	432.7	368.3	451.8	446.6	406.5	370.5	498.3
P28907	CD38	ADP-ribosyl cyclase/cyclic ADP-ribose hydrolase 1	Homo sapiens	High	18	2420.2	2433.3	2214.9	2352.5	2198.9	2192.2	2232.3	2526.2	2209.1	2170.6
P04234	CD3D	T-cell surface glycoprotein CD3 delta chain	Homo sapiens	High	6	599.3	648.2	758.7	642.1	562.2	685.8	681.5	614.5	628.9	617.1
P07766	CD3E	T-cell surface glycoprotein CD3 epsilon chain	Homo sapiens	High	8	792.2	1110.3	897.8	975.6	845.2	1200.6	817.4	1051.4	790	651.7
O15446	CD3EAP	DNA-directed RNA polymerase I subunit RPA34	Homo sapiens	High	13	1385.6	1155.6	1142.1	1171	1421.6	1227.5	1087.2	1248.2	1446.6	1257.9
P09693	CD3G	T-cell surface glycoprotein CD3 gamma chain	Homo sapiens	High	7	1423.2	1345.2	1487.2	1436.6	1524.9	1429	1572.3	1373	1493.4	1501.5
P01730	CD4	T-cell surface glycoprotein CD4	Homo sapiens	High	17	2517.3	2518.9	2113.3	2343.5	2080.6	2382.1	2280.6	2577	2383.5	2000.2
P16070	CD44	CD44 antigen	Homo sapiens	High	7	2429	2517.8	2536.1	2384.2	2468.7	2383.9	2556	2329.8	2299.9	2354.2
P15529-2	CD46	Isoform B of Membrane cofactor protein	Homo sapiens	Medium	1	23.1	29.4	36.6	24.2	33.7	24.6	31.2	20.4	25	28.3
P15529	CD46	Membrane cofactor protein	Homo sapiens	High	7	1196	1169.1	1039.8	1132.9	1272.8	1046.4	1343.6	1327	1191.2	1123
Q08722	CD47	Leukocyte surface antigen CD47	Homo sapiens	High	5	1219.5	1191.9	1401.7	1114.9	1209	1015.9	1380.9	1079.1	1219.8	1284
P09326	CD48	CD48 antigen	Homo sapiens	High	5	298.2	304.9	281	292	236.7	245.4	266.5	307.3	276.3	272.5
P06127	CD5	T-cell surface glycoprotein CD5	Homo sapiens	High	4	205.1	193.4	210.5	196.4	193.4	176.4	206.7	188.9	188	223.6
P19397	CD53	Leukocyte surface antigen CD53	Homo sapiens	Medium	1	105.8	131.3	135.6	133	99.3	120	130.2	102.8	101.9	89.1
P08174	CD55	Complement decay-accelerating factor	Homo sapiens	High	3	194.7	201.3	204.5	194.4	209.6	209.6	222.3	185.4	209.5	200.7
P13987	CD59	CD59 glycoprotein	Homo sapiens	High	2	173.5	149.9	121	142.3	144.7	119.8	158.9	159.1	137.9	127.3
P08962	CD63	CD63 antigen	Homo sapiens	High	4	578.4	590.6	792.2	592.9	631.6	566.3	819.5	590.4	750.6	686.4
Q07108	CD69	Early activation antigen CD69	Homo sapiens	Medium	2	247.7	217.3	180.1	218.2	208.6	211.2	216.7	219	233.8	207.4
P09564	CD7	T-cell antigen CD7	Homo sapiens	High	4	187.6	189.3	250.4	218	154.5	185.8	219.2	172.9	178.8	190.7
P40259	CD79B	B-cell antigen receptor complex-associated protein beta chain	Homo sapiens	High	2	14.1	16.2	15	16.3	11.2	21.8	10.1	15.4	12.5	14.3
P60033	CD81	CD81 antigen	Homo sapiens	High	6	966.9	1138.1	1227.7	1204.1	1011.4	1271.7	1173.4	1177.3	1098.5	1109.7
P27701	CD82	CD82 antigen	Homo sapiens	High	6	641.9	683.9	1031.5	752	585.5	701.5	824.5	647.9	886.9	872.2
Q01151	CD83	CD83 antigen	Homo sapiens	High	4	496.7	490.5	377.6	566.9	338.4	490.6	416.1	542.8	496.6	456.8
Q9UIB8	CD84	SLAM family member 5	Homo sapiens	High	10	766.6	846.7	944.9	837.5	889.3	757.5	897.8	844.2	818.2	881.3
P48960	CD97	CD97 antigen	Homo sapiens	High	9	256.2	316.4	400.9	285	280.4	283.2	368.6	251.5	248.5	392.9
H7C2F2	CD99	CD99 antigen (Fragment)	Homo sapiens	High	1	87.2	106.6	108.5	145.9	155.2	115.4	171.5	139.9	142.5	159.5
P14209	CD99	CD99 antigen	Homo sapiens	High	2	192.7	158.9	87.4	169	146.5	157.8	140.5	229.9	193.4	146.8
Q8TCZ2	CD99L2	CD99 antigen-like protein 2	Homo sapiens	High	5	374.1	399.8	400.6	381.3	380.2	389.2	376.1	360.1	394.1	431
Q9BWV3	CDADC1	Cytidine and dCMP deaminase domain-containing protein 1	Homo sapiens	High	2	60.3	73.1	102.5	74.9	72.7	70.9	77.6	63.6	65.6	80.5
Q8IWY9	CDAN1	Codanin-1	Homo sapiens	High	19	744.7	744.9	768.6	752	711.4	729.1	768	730.5	741.1	763.8
O75794	CDC123	Cell division cycle protein 123 homolog	Homo sapiens	High	15	1290.1	1232.3	1103.8	1284.5	1575.8	1356.4	1205.5	1365.3	1298.8	1282.3
Q13042	CDC16	Cell division cycle protein 16 homolog	Homo sapiens	High	23	2684	2839.2	3233.9	2796.9	2709.4	2926.3	2971.6	2628.9	2816.1	2937.2
Q12834	CDC20	Cell division cycle protein 20 homolog	Homo sapiens	High	14	1081.4	1042.2	1310.4	1142.3	1605.5	1277.1	1344.3	1125.8	1159.4	1348.7
Q9UJX2	CDC23	Cell division cycle protein 23 homolog	Homo sapiens	High	23	2387.8	2896.4	3059.3	2892.4	2580.6	3073.8	2709.3	2807.7	2517.1	2440.1
P30305	CDC25B	M-phase inducer phosphatase 2	Homo sapiens	High	7	475.5	529.3	638.8	585.9	750.7	614.5	599.8	571.5	558.3	627.5
P30307	CDC25C	M-phase inducer phosphatase 3	Homo sapiens	High	12	601.4	611.7	549.4	533.3	576.6	631.8	609.8	581.7	578.7	576.9
Q8NHZ8	CDC26	Anaphase-promoting complex subunit CDC26	Homo sapiens	High	3	389.1	306.3	470.8	311.2	389.9	295.4	354.1	291.4	401.5	438.6
P30260	CDC27	Cell division cycle protein 27 homolog	Homo sapiens	High	34	3969.1	3903.6	4223.9	3959.8	4328	4057.8	4346.9	3937.3	4147.2	4252.6
P49427	CDC34	Ubiquitin-conjugating enzyme E2 R1	Homo sapiens	High	7	699.2	589.8	639.1	660.3	801.8	660.6	674.5	649.1	696.5	760.7
K7EKQ2	CDC37	Hsp90 co-chaperone Cdc37 (Fragment)	Homo sapiens	Medium	3	949.1	1114.6	921.7	1083.8	1011.8	1199.8	974.2	1138.3	910.4	870.6
Q16543	CDC37	Hsp90 co-chaperone Cdc37	Homo sapiens	High	23	4799.3	5108.1	5522.4	4917.3	5057.6	4796.7	5367.7	4990.7	4710.1	5310.7
Q7L3B6	CDC37L1	Hsp90 co-chaperone Cdc37-like 1	Homo sapiens	High	8	466.2	452.2	517.1	464.1	516.1	475.7	519	435.9	473.7	509.2
O60508	CDC40	Pre-mRNA-processing factor 17	Homo sapiens	High	32	4442.4	4442.6	4226.2	4416.3	4348.2	4490.6	4397.3	4449.3	4490.7	4459.8
P60953	CDC42	Cell division control protein 42 homolog	Homo sapiens	High	10	4243	4167.5	3297	4331.8	3837.7	3709.5	4034.6	4086.3	4369.3	3850.6
Q9NRR3	CDC42SE2	CDC42 small effector protein 2	Homo sapiens	High	2	86.7	71.5	68.3	73.4	73.1	68	71.5	65.3	72	72.2
O75419	CDC45	Cell division control protein 45 homolog	Homo sapiens	High	15	2173.1	1945.5	1978.5	2064.4	2124.2	2119.9	1961.7	1962	2148.2	2054.5
Q99459	CDC5L	Cell division cycle 5-like protein	Homo sapiens	High	49	7353.6	7585.9	7826.9	7368.6	7540.1	7489.8	7667.1	7437.2	7180.2	7294.1
Q99741	CDC6	Cell division control protein 6 homolog	Homo sapiens	High	13	698.7	786	780.7	803.2	720.6	828.3	733.8	794.3	712.3	775.9
O00311	CDC7	Cell division cycle 7-related protein kinase	Homo sapiens	High	12	1157.9	1064.9	1071.1	1159.5	1415.4	1157.9	1118.2	1255.7	1116.9	1166.7
Q6P1J9	CDC73	Parafibromin	Homo sapiens	High	33	4744.9	5064.4	5481.8	5076.3	4707.8	5205.5	5189.6	4739.4	4815.8	5082.8
Q69YH5	CDCA2	Cell division cycle-associated protein 2	Homo sapiens	High	50	4522.6	4601.2	5074.6	4601.3	6190.1	5072.1	4989.1	4670.2	4681.8	4895.2
Q99618	CDCA3	Cell division cycle-associated protein 3	Homo sapiens	High	11	1601	1555.3	1546.6	1529.3	3066.5	1767.6	1622.6	1600.2	1548.5	1540.1
Q9BXL8	CDCA4	Cell division cycle-associated protein 4	Homo sapiens	High	6	220.2	301.6	319.7	313.9	206.9	364.4	296.7	306.6	236.8	292.2
Q96FF9	CDCA5	Sororin	Homo sapiens	High	8	1325.6	1174.1	940.5	1329	1614.8	1393.2	1075.4	1398.5	1381.7	1124.5
Q9BWT1	CDCA7	Cell division cycle-associated protein 7	Homo sapiens	High	5	980.9	987.2	894.5	983.2	763.7	1113.8	924.2	1010.8	1025.4	1019
Q96GN5	CDCA7L	Cell division cycle-associated 7-like protein	Homo sapiens	High	10	792.2	688.9	736.3	720.6	743.9	748.4	751.5	760.3	904.4	801.9
Q53HL2	CDCA8	Borealin	Homo sapiens	High	13	1259.7	1288.1	1283.1	1329.8	2572.1	1446.5	1266.9	1362	1284.1	1230.2
P19022	CDH2	Cadherin-2	Homo sapiens	High	10	280.4	271.9	315.2	285.5	297.5	292.8	323.5	263.6	294.3	311.1
O14735	CDIPT	CDP-diacylglycerol--inositol 3-phosphatidyltransferase	Homo sapiens	High	4	437.2	489.9	628.3	477.7	516.2	514.3	523.7	498.4	505	589.3
P06493	CDK1	Cyclin-dependent kinase 1	Homo sapiens	High	19	4651.8	4757.4	4800	4796.1	5247.9	4747.1	5061	5032.5	4705.1	4685.8
Q15131	CDK10	Cyclin-dependent kinase 10	Homo sapiens	High	4	119.9	118	130.6	111.5	132.8	127.9	123.8	114.4	126.8	133.8
Q9UQ88	CDK11A	Cyclin-dependent kinase 11A	Homo sapiens	High	3	245.8	233.6	174.1	233.8	216.9	231.5	190.7	242.4	225.7	218.5
P21127	CDK11B	Cyclin-dependent kinase 11B	Homo sapiens	High	6	5095.8	4964.8	5682.9	5062.6	5012.2	4900.8	5246.5	5192.8	4980.4	5542.6
Q9NYV4	CDK12	Cyclin-dependent kinase 12	Homo sapiens	High	32	2935.3	2779.5	3040	2801.8	2980.2	2863.8	2843.1	2782	2794.4	3089
Q14004-2	CDK13	Isoform 2 of Cyclin-dependent kinase 13	Homo sapiens	Medium	7	474.2	519.7	552.9	510.1	485.9	503.4	493.6	459.5	501.5	545.3
Q14004	CDK13	Cyclin-dependent kinase 13	Homo sapiens	High	35	4318.9	4357.2	4350.2	4289.3	4266.3	4451.3	4251	4381.5	4194.3	4228.8
Q00536	CDK16	Cyclin-dependent kinase 16	Homo sapiens	High	1	47.8	48.6	56.1	49.3	44.9	54.3	47.6	41.9	49.9	56.5
Q00537	CDK17	Cyclin-dependent kinase 17	Homo sapiens	High	9	901.2	915.8	949	875.7	1142.5	1010.9	1023.2	862.8	845.5	934.9
Q9BWU1	CDK19	Cyclin-dependent kinase 19	Homo sapiens	High	3	412.2	405.9	274.7	413.8	378.6	458.9	347.7	419.4	417.6	340.4
P24941	CDK2	Cyclin-dependent kinase 2	Homo sapiens	High	19	2831.6	2743.2	2398.3	2809.5	2827.5	2899.5	2700.7	2994.5	2699.8	2507.3
O14519	CDK2AP1	Cyclin-dependent kinase 2-associated protein 1	Homo sapiens	High	2	63.1	63	77.8	70.1	68.9	71.1	63.6	67.6	76.6	82.5
P11802	CDK4	Cyclin-dependent kinase 4	Homo sapiens	High	12	1653.2	1616.7	1795.9	1707.5	1497.5	1716.2	1950.8	1721.8	1882.4	1906.8
Q00535	CDK5	Cyclin-dependent-like kinase 5	Homo sapiens	High	10	1504	1384.1	1328.8	1392	1605.1	1323.1	1553.5	1495.4	1494.9	1444.7
Q96SZ6	CDK5RAP1	CDK5 regulatory subunit-associated protein 1	Homo sapiens	High	18	1565.7	1677	1684.5	1626.8	1495.8	1779.2	1579.2	1608.1	1702.3	1661
Q96SN8	CDK5RAP2	CDK5 regulatory subunit-associated protein 2	Homo sapiens	High	55	4804	4535.3	5450.2	4617.2	4658.9	4705.8	5274.9	4498	4980.4	5540.3
Q96JB5	CDK5RAP3	CDK5 regulatory subunit-associated protein 3	Homo sapiens	High	25	3596.8	3465.7	4103.9	3534.1	3588.3	3424.3	3976.9	3429.6	3638	3674.1
Q00534	CDK6	Cyclin-dependent kinase 6	Homo sapiens	High	17	2429.6	2579.5	2674.5	2587.9	2604.5	2790	2588.1	2582	2331.2	2515.6
P50613	CDK7	Cyclin-dependent kinase 7	Homo sapiens	High	10	2043.5	2061.4	2484.6	2060.1	2312.2	2082.1	2441.9	1902.6	2230.1	2378.1
P49336	CDK8	Cyclin-dependent kinase 8	Homo sapiens	High	8	1451.4	1374.4	1169.9	1388.7	1392.7	1418.6	1241.4	1461.1	1474.2	1279.4
P50750	CDK9	Cyclin-dependent kinase 9	Homo sapiens	High	12	947.2	956.9	1133.2	959.1	902.1	820.6	1018.6	879.8	969.7	1093.9
Q5VV42	CDKAL1	Threonylcarbamoyladenosine tRNA methylthiotransferase	Homo sapiens	High	22	2379.2	2725.9	2611.8	2698	2496.8	2893	2598.2	2853.9	2446.3	2575.5
P46527	CDKN1B	Cyclin-dependent kinase inhibitor 1B	Homo sapiens	High	5	58.7	58.9	52.9	61.1	43.6	55	48.9	53.6	59.5	47
Q9NXV6	CDKN2AIP	CDKN2A-interacting protein	Homo sapiens	High	26	3016.9	3008.9	2836.9	2962.1	2666.8	2971.6	2824.7	2943	2881.3	2856.5
Q96HQ2	CDKN2AIPNL	CDKN2AIP N-terminal-like protein	Homo sapiens	High	5	309.6	314.7	373.3	304.4	322.9	297	340.2	296.1	302.5	327.9
P42773	CDKN2C	Cyclin-dependent kinase 4 inhibitor C	Homo sapiens	High	7	787.6	743.6	853.1	746.3	797	731.4	879.1	757.6	784.9	837
P55273	CDKN2D	Cyclin-dependent kinase 4 inhibitor D	Homo sapiens	High	4	424.6	434.2	505.7	430.1	304.4	440.5	405.2	395.4	427.6	433.1
Q16667	CDKN3	Cyclin-dependent kinase inhibitor 3	Homo sapiens	High	2	251.3	231.8	214.8	239.4	354.4	305.6	245.1	251.2	228.8	241.7
Q6NVV7	CDPF1	Cysteine-rich DPF motif domain-containing protein 1	Homo sapiens	High	1	52.4	49.4	64.3	52	47.5	51.3	58.5	45.7	49	60.5
Q01850	CDR2	Cerebellar degeneration-related protein 2	Homo sapiens	High	14	1082.8	1094.8	1096.1	1145.9	1158.7	1313.2	1107.6	1096.6	1123.1	1183.6
O95674	CDS2	Phosphatidate cytidylyltransferase 2	Homo sapiens	High	6	1038.7	990.6	1137.8	858.9	1071.4	907.3	1026.2	902.2	1117.1	1179.4
Q15517	CDSN	Corneodesmosin	Homo sapiens	High	2	35.2	43.3	26	42.9	28.6	124.4	70.9	27.3	36	43.5
Q9H211	CDT1	DNA replication factor Cdt1	Homo sapiens	High	8	313	326.6	443.6	304.7	400	311.6	367.4	309.3	320.2	362.3
Q9UKY7	CDV3	Protein CDV3 homolog	Homo sapiens	High	14	2981.4	2990	3154.6	2770.6	3128.8	2712.9	2802.9	2670.1	2924.7	2882.2
Q9Y232	CDYL	Chromodomain Y-like protein	Homo sapiens	High	12	628.1	620.5	554.7	619.9	670.3	656.5	562.1	631.4	668.6	624.9
Q8N8U2	CDYL2	Chromodomain Y-like protein 2	Homo sapiens	High	1	43.9	44.3	39	46.4	51.6	40.7	39.5	40.7	45.9	42.4
Q3KPI0	CEACAM21	Carcinoembryonic antigen-related cell adhesion molecule 21	Homo sapiens	Medium	1	13	13.4	14.3	16.3	14.8	18.3	13.5	18.8	14.5	13.7
P17676	CEBPB	CCAAT/enhancer-binding protein beta	Homo sapiens	High	5	154	167.7	276	162.3	135.8	204.5	170.4	152.9	166.2	207.7
P53567	CEBPG	CCAAT/enhancer-binding protein gamma	Homo sapiens	High	2	103	127.7	132.1	118.5	103.2	124	119.1	122.4	113.3	124
C9J9W7	CEBPZ	CCAAT/enhancer-binding protein zeta (Fragment)	Homo sapiens	High	2	38.1	36.1	44.5	32	31.6	45.3	45.6	40.6	44.7	44
Q03701	CEBPZ	CCAAT/enhancer-binding protein zeta	Homo sapiens	High	43	8519.1	8664.6	8602.4	8714.4	6947.8	9256.6	8264	8576.8	8558.4	8437.6
Q9BXW7	CECR5	Cat eye syndrome critical region protein 5	Homo sapiens	High	15	1860.9	1805.6	1880.7	1787.5	1771.6	1901.7	1823.4	1797.9	1750.5	1821.1
G5EA30	CELF1	CUG triplet repeat, RNA binding protein 1, isoform CRA_c	Homo sapiens	High	5	69.8	77.7	105.9	78.2	48.5	85.4	82.2	75.7	78.6	95.3
E9PSH0	CELF1	CUGBP Elav-like family member 1 (Fragment)	Homo sapiens	Medium	3	170.2	153.3	122.9	148.4	181	119.5	169.9	192.8	189.1	194.7
Q92879	CELF1	CUGBP Elav-like family member 1	Homo sapiens	High	15	3636.6	3755.7	3132	3782.1	3618.5	3926.6	3314.9	3775.2	3650.8	3302.4
A0A0J9YXJ0	CELF2	CUGBP Elav-like family member 2	Homo sapiens	High	5	825.4	827.5	918.9	828.6	755.5	891.8	786.4	715.9	809	865.9
O95319	CELF2	CUGBP Elav-like family member 2	Homo sapiens	High	13	4021.6	3549.2	3363.5	3549.8	3799.6	3579.6	3660.4	3750.9	3836.5	3579.5
P49450	CENPA	Histone H3-like centromeric protein A	Homo sapiens	Medium	1	79.3	61.2	74.5	79.3	94.3	76.8	81.3	61	87.7	86.4
P07199	CENPB	Major centromere autoantigen B	Homo sapiens	High	9	596.1	569.1	602.2	551.8	638.6	560	614.6	611.9	614	605.6
Q03188	CENPC	Centromere protein C	Homo sapiens	High	29	2467.2	2488	2452.2	2420	2477.4	2372.2	2435.3	2474.5	2458.2	2442.9
Q02224	CENPE	Centromere-associated protein E	Homo sapiens	High	111	9389.4	9756.2	10340.7	10274.8	16239.9	11563.5	10150.7	10187.4	9816.3	10556.4
P49454	CENPF	Centromere protein F	Homo sapiens	High	178	21047.6	21176.2	23669.1	22144.9	34901.3	24583.9	22987.7	21984	21724.3	22796
Q9H3R5	CENPH	Centromere protein H	Homo sapiens	High	15	2653	2794.3	2986	2774	2310.1	2893.6	2783.7	2636.9	2655.2	2853.3
Q92674	CENPI	Centromere protein I	Homo sapiens	High	12	1635.8	1642.1	1770.9	1676.6	1626.7	1714	1731.3	1611.3	1651.9	1659.6
Q9HC77	CENPJ	Centromere protein J	Homo sapiens	High	12	827.5	824.9	925.1	861	821.3	898.2	853.5	820.1	820	867.3
Q9BS16	CENPK	Centromere protein K	Homo sapiens	High	9	1301.6	1289.7	1400.5	1304.4	1231.9	1338.8	1362.6	1289.2	1253.4	1323.9
Q8N0S6	CENPL	Centromere protein L	Homo sapiens	High	7	818.3	750.3	571.8	757.1	776.2	737.3	686.6	812.1	789.6	636.4
Q9NSP4	CENPM	Centromere protein M	Homo sapiens	High	5	303.9	262.3	330.2	238.7	297.1	255.4	314.2	251.3	326.2	331.7
Q96H22	CENPN	Centromere protein N	Homo sapiens	High	8	882.4	926.6	899.4	906.4	864.1	973	893.6	878	908.1	852.9
Q9BU64	CENPO	Centromere protein O	Homo sapiens	High	6	457.7	450.7	354.5	453.6	421.6	459	398.9	459.6	470.2	429.8
Q6IPU0	CENPP	Centromere protein P	Homo sapiens	High	9	511.1	573.9	574.2	557.6	510.3	573.9	580.9	561.9	491.2	542.2
Q7L2Z9	CENPQ	Centromere protein Q	Homo sapiens	High	12	1544.4	1580.5	1550.3	1624.7	1483.7	1679.6	1584.9	1578	1602.5	1579.4
Q96BT3	CENPT	Centromere protein T	Homo sapiens	High	9	580.5	513.5	405.3	551.1	573.8	586.8	482.8	572.6	559	508.5
Q71F23	CENPU	Centromere protein U	Homo sapiens	High	16	1768.8	1956.9	2207.6	1935.5	1516.5	2029.9	1955.3	1799	1774	1895.5
Q7Z7K6	CENPV	Centromere protein V	Homo sapiens	High	11	1679.7	1740.7	1539.6	1705.9	1728.3	1704	1664.6	1787.7	1678.5	1601.7
O60308	CEP104	Centrosomal protein of 104 kDa	Homo sapiens	High	4	128.1	142.2	159.1	149.8	139.8	145.4	141.4	132.1	152.1	144.2
Q8N960	CEP120	Centrosomal protein of 120 kDa	Homo sapiens	High	13	471.3	458.1	444.8	473.5	393.5	499.2	438.6	464.9	443.9	486.4
Q6ZU80	CEP128	Centrosomal protein of 128 kDa	Homo sapiens	High	32	2193.5	2330.4	2465.7	2309.1	2294.7	2426.1	2360.3	2226.7	2280.1	2423.4
Q9UPN4	CEP131	Centrosomal protein of 131 kDa	Homo sapiens	High	49	5055.2	5219.1	5675.9	5182	4466.1	5293	5407.1	5012.5	4969.7	5276.7
Q66GS9	CEP135	Centrosomal protein of 135 kDa	Homo sapiens	High	46	4439.8	4854.7	5159.1	4687.9	3699.8	5079.9	4793.6	4543.2	4431.6	5058.3
O94986	CEP152	Centrosomal protein of 152 kDa	Homo sapiens	High	29	1413.4	1411.5	1691.5	1470.5	1223.6	1477.2	1605.6	1349.2	1544.4	1626
Q5TB80	CEP162	Centrosomal protein of 162 kDa	Homo sapiens	Medium	1	152.3	159	208.4	166.7	155.3	175.3	171.7	160.1	152.7	173.1
Q9UPV0	CEP164	Centrosomal protein of 164 kDa	Homo sapiens	High	5	259.9	327.3	327.5	342.4	307.8	290.3	286.3	266.9	337.2	332
Q5SW79-3	CEP170	Isoform 3 of Centrosomal protein of 170 kDa	Homo sapiens	Medium	11	17.9	18.6	29.1	20.5	21.2	23.9	19.3	17.4	19.4	22.3
Q5SW79	CEP170	Centrosomal protein of 170 kDa	Homo sapiens	High	57	5655.5	5483.1	6007.4	5552.2	5425.2	5496.4	5770.4	5232.7	5634.1	5922.7
Q8TEP8-3	CEP192	Isoform 3 of Centrosomal protein of 192 kDa	Homo sapiens	High	11	330.9	321.7	329.8	343.6	322.6	411.9	331.5	324.5	323.9	343.3
Q8TEP8	CEP192	Centrosomal protein of 192 kDa	Homo sapiens	High	20	1955.1	1808.4	1494.4	1839.7	1857.2	1808.9	1631.4	1914	1922.3	1722.1
Q9BV73	CEP250	Centrosome-associated protein CEP250	Homo sapiens	High	71	4423	4554.6	5540	4358.1	4401.5	4573.5	4833.2	4258.8	4518.2	4803.8
O15078	CEP290	Centrosomal protein of 290 kDa	Homo sapiens	High	40	2882.2	2786.4	3421	2746.6	2716.2	2827.8	3018.5	2658.8	3025.4	3285.9
Q9C0D2	CEP295	Centrosomal protein of 295 kDa	Homo sapiens	High	14	749.6	786.1	792.1	777.8	775.5	842.1	768.1	801.5	802.6	805.8
A2A4F6	CEP350	Centrosome-associated protein 350 (Fragment)	Homo sapiens	Medium	2	82.6	84.6	125.7	98.8	81.2	84.6	96.2	84.4	86.4	101.1
Q5VT06	CEP350	Centrosome-associated protein 350	Homo sapiens	High	72	5526.1	5676.9	6852.7	5515.1	5101.4	5736.6	5878.4	5395	5556.5	6138.1
Q9BYV8	CEP41	Centrosomal protein of 41 kDa	Homo sapiens	High	14	960.7	1061.8	1016.4	1060.9	1048.9	1090.4	1032.1	1084.4	1018.2	1007.6
Q9C0F1	CEP44	Centrosomal protein of 44 kDa	Homo sapiens	High	14	1278.3	1326.2	1488.2	1287.6	1226.4	1224.4	1442.1	1193.7	1482	1408.5
Q53EZ4	CEP55	Centrosomal protein of 55 kDa	Homo sapiens	High	27	2270.2	2260.8	2502.7	2100.5	2491.2	2295.4	2387.1	2214.8	2349.1	2504.9
Q86XR8	CEP57	Centrosomal protein of 57 kDa	Homo sapiens	High	22	2229.4	2232.2	2569.2	2203.1	1972	2330.5	2490.4	2164.5	2321.9	2492
Q96MT8-3	CEP63	Isoform 3 of Centrosomal protein of 63 kDa	Homo sapiens	High	4	157.7	170.7	221.8	181.8	140.5	219.7	166.5	161.8	175.1	219.4
Q96MT8	CEP63	Centrosomal protein of 63 kDa	Homo sapiens	High	6	469.4	722.7	305.3	670.5	500.5	526.9	410.2	787.3	436.5	263.5
Q76N32	CEP68	Centrosomal protein of 68 kDa	Homo sapiens	High	1	11.7	13.7	16.3	14	10.9	12.9	12.8	11.8	12.4	14.4
Q8NHQ1	CEP70	Centrosomal protein of 70 kDa	Homo sapiens	High	6	492.3	422.6	475.5	416.3	456	397.8	531.6	394.2	497	493
Q9P209	CEP72	Centrosomal protein of 72 kDa	Homo sapiens	High	6	116.9	119.8	131.3	132.7	116	133.8	132.2	126.7	128.7	134.8
Q8TAP6	CEP76	Centrosomal protein of 76 kDa	Homo sapiens	High	11	1083.2	1056.4	1039.4	1040.4	1074.7	1069.4	1076.8	1113.5	1095.5	1143
Q5JTW2	CEP78	Centrosomal protein of 78 kDa	Homo sapiens	High	19	1076.3	1082.3	1003.4	1075.9	830.1	1154.4	1123.5	1173	1133.7	1151.2
Q9Y592	CEP83	Centrosomal protein of 83 kDa	Homo sapiens	High	7	346.2	341.1	414.1	341.8	413.1	287.9	404.6	337	402	432.7
Q6P2H3	CEP85	Centrosomal protein of 85 kDa	Homo sapiens	High	23	1868.5	1904.6	2030.1	1921.4	1833	2046	1985.7	1984.5	1852.9	1983.5
Q5SZL2	CEP85L	Centrosomal protein of 85 kDa-like	Homo sapiens	High	10	250.9	256.6	259	274.9	257.5	228.1	286.1	248.3	259.5	270.1
Q96ST8	CEP89	Centrosomal protein of 89 kDa	Homo sapiens	High	3	70.8	105.2	88.5	86.4	84.1	96.6	84.5	100.7	74.4	80.6
Q96GE4	CEP95	Centrosomal protein of 95 kDa	Homo sapiens	High	7	321.3	365.5	417.6	364.6	346.6	406.6	421.9	317.1	376.5	428.7
Q8IW35	CEP97	Centrosomal protein of 97 kDa	Homo sapiens	High	26	2070.1	2339.7	2259.9	2311.2	1686	2181	2067.7	2282	2074.8	2197.3
Q9Y6K0	CEPT1	Choline/ethanolaminephosphotransferase 1	Homo sapiens	High	5	1746.1	1631.5	1587.9	1718.2	1724.7	1864.3	1432.5	1690.5	1736.3	1678.1
Q5T4B2	CERCAM	Probable inactive glycosyltransferase 25 family member 3	Homo sapiens	Medium	1	73.4	78.4	80.7	69.8	48.1	78	80.7	64	73.2	74.7
Q8TCT0	CERK	Ceramide kinase	Homo sapiens	High	2	111.7	106.2	119.8	101	102	104.2	105.1	112.5	124.8	126
Q96G23	CERS2	Ceramide synthase 2	Homo sapiens	High	7	1164.4	1249.3	912.1	1288.8	1281.3	1501.1	994.7	1317.9	1186.5	1028.4
Q9HA82	CERS4	Ceramide synthase 4	Homo sapiens	High	3	84.6	85.4	66.3	75.3	75.3	92.4	68	80.3	85.9	79
Q8N5B7	CERS5	Ceramide synthase 5	Homo sapiens	High	5	1441.2	1170.6	953	1277.7	1466.1	1291.9	1193.3	1325.3	1483	1270.8
Q6ZMG9	CERS6	Ceramide synthase 6	Homo sapiens	High	1	212.3	174.4	138.9	203.7	239.3	219.6	166.9	232.6	218.2	179.6
O00748	CES2	Cocaine esterase	Homo sapiens	Medium	1	59	43.9	92.1	52.6	68.9	48.5	75.3	40.7	67.5	81.6
Q6UWW8	CES3	Carboxylesterase 3	Homo sapiens	High	10	1102.8	903	629.1	982	1094.4	930.8	792.3	1083	1070.7	900.6
P41208	CETN2	Centrin-2	Homo sapiens	High	7	1945.1	2031.7	1821.3	1939.2	2007.8	2112.2	1907.1	1976.3	1898	2082.6
O15182	CETN3	Centrin-3	Homo sapiens	High	12	1291.7	1507	1575.2	1390.1	1228.4	1553.1	1407.1	1335.1	1321.9	1514.4
Q9Y6A4	CFAP20	Cilia- and flagella-associated protein 20	Homo sapiens	High	7	491.4	515.7	617.2	518.4	501.1	515.8	576.5	460.8	563.3	564.3
Q96G28	CFAP36	Cilia- and flagella-associated protein 36	Homo sapiens	High	17	1604.2	1562.2	1744.8	1427.1	1513.5	1632.5	1649.8	1463.9	1608.7	1744.4
Q6ZTR5	CFAP47	Cilia- and flagella-associated protein 47	Homo sapiens	High	3	284.5	210.4	187.8	196.9	314	178.1	239.1	223.2	312.2	217.1
Q9P2B7	CFAP97	Cilia- and flagella-associated protein 97	Homo sapiens	High	12	907	995.4	889.1	950	647.1	985.1	930.2	953.8	920.3	982.6
Q9UEE9	CFDP1	Craniofacial development protein 1	Homo sapiens	High	15	1975.6	2093.2	1737	2004.5	1893.8	2138.7	1969.4	2008.8	1721.9	1877
P23528	CFL1	Cofilin-1	Homo sapiens	High	21	17999.5	18929.7	14893.2	19975.7	17466.7	17003.6	16495.8	19579.3	19176.5	16763.1
Q9Y281	CFL2	Cofilin-2	Homo sapiens	High	6	333	308.5	320.9	310.2	389.9	315.4	372.2	306.6	351.7	389.3
Q9UFW8	CGGBP1	CGG triplet repeat-binding protein 1	Homo sapiens	High	13	1735.2	1983.6	2043.4	1986.3	1571.2	1959.7	1953.8	1916.5	1632.6	1790.7
Q9P2M7	CGN	Cingulin	Homo sapiens	High	2	97.3	112.9	101.6	105.8	122.6	105.9	99.1	97.9	97.5	105.2
Q8WUX2	CHAC2	Putative glutathione-specific gamma-glutamylcyclotransferase 2	Homo sapiens	High	4	475.7	579.7	476.5	575.3	546.2	629.6	504.4	591.6	456.2	515.8
Q13111	CHAF1A	Chromatin assembly factor 1 subunit A	Homo sapiens	High	37	3739.3	3571.2	3806	3592.7	3516.5	3559.4	3689.1	3739.9	3721.8	3901.9
Q13112	CHAF1B	Chromatin assembly factor 1 subunit B	Homo sapiens	High	20	2947.5	2630.8	2765.4	2686.4	2725.5	2626	2827.6	2737.6	2864.4	2786.4
Q96JM3	CHAMP1	Chromosome alignment-maintaining phosphoprotein 1	Homo sapiens	High	33	5977.7	5551.4	5301.6	5619.4	5101.6	5553	5477.5	5660.8	5701.5	5621.5
Q96BP2	CHCHD1	Coiled-coil-helix-coiled-coil-helix domain-containing protein 1	Homo sapiens	High	1	217.2	263.1	363.5	332.9	263.2	347.4	265.3	313.5	304	326.5
Q8WYQ3	CHCHD10	Coiled-coil-helix-coiled-coil-helix domain-containing protein 10, mitochondrial	Homo sapiens	High	1	13.7	12.4	18.2	13.5	15.6	10.2	16	11.6	13.1	19.6
Q9Y6H1	CHCHD2	Coiled-coil-helix-coiled-coil-helix domain-containing protein 2	Homo sapiens	High	2	60.9	54.3	74.2	52.1	50.7	48.7	59.4	45.2	58	77.4
Q9NX63	CHCHD3	MICOS complex subunit MIC19	Homo sapiens	High	17	3716.4	3313.8	4270.3	3274.1	3979.2	3120.3	4063.2	3219.4	3819.7	4271.7
Q8N4Q1	CHCHD4	Mitochondrial intermembrane space import and assembly protein 40	Homo sapiens	High	5	962.1	960.6	760.4	984.5	926.4	917.7	782.9	896.9	866.7	803.2
Q9BRQ6	CHCHD6	MICOS complex subunit MIC25	Homo sapiens	High	10	1031.9	1052.3	1163.8	998.8	1017.9	1091.1	1080	1017.9	968.7	984.2
O14646	CHD1	Chromodomain-helicase-DNA-binding protein 1	Homo sapiens	High	57	7094.1	7634.1	7969	7800.4	7545.1	8015.7	7619.7	7434.7	7291.4	7623.3
Q86WJ1	CHD1L	Chromodomain-helicase-DNA-binding protein 1-like	Homo sapiens	High	44	5766.5	5455.7	5675.5	5347.8	5279.2	5583	5464.1	5322	5679.8	5686.5
O14647	CHD2	Chromodomain-helicase-DNA-binding protein 2	Homo sapiens	High	36	3713.1	3672.5	3245.7	3617.7	3605	3685.2	3309.2	3700.7	3620.2	3545.5
Q12873	CHD3	Chromodomain-helicase-DNA-binding protein 3	Homo sapiens	High	52	6790.6	6554.3	6039.4	6632.2	6465.9	6841	5957.6	6585	6590.1	6166.9
Q14839	CHD4	Chromodomain-helicase-DNA-binding protein 4	Homo sapiens	High	76	24097.2	23510	22468.8	22979.8	24270.2	22771.6	22639.2	24200.2	23929	23065.1
Q8TDI0	CHD5	Chromodomain-helicase-DNA-binding protein 5	Homo sapiens	High	2	18.2	14	20.3	23	23	19.7	31.3	27.2	17.8	24.9
Q8TD26	CHD6	Chromodomain-helicase-DNA-binding protein 6	Homo sapiens	High	51	4641.5	4973	4779.8	4465.4	3368.6	4688.6	4399.5	4664.5	5355.1	4446.5
Q9P2D1	CHD7	Chromodomain-helicase-DNA-binding protein 7	Homo sapiens	High	52	5682.2	6187.8	6269.8	5548.3	5633.6	6036.6	5682.1	5835.7	6542	5688.4
Q9HCK8	CHD8	Chromodomain-helicase-DNA-binding protein 8	Homo sapiens	High	48	4747.4	4685.3	4954.7	4862.5	4787.2	4998.7	4820	4703.7	4843.1	4975.8
Q3L8U1	CHD9	Chromodomain-helicase-DNA-binding protein 9	Homo sapiens	High	32	1484.6	1514.6	1790.4	1537.3	1582.2	1620.1	1490.8	1420.4	1570.3	1676
O14757	CHEK1	Serine/threonine-protein kinase Chk1	Homo sapiens	High	21	2996.9	3050.3	2958.9	3147.4	2747.8	3169.5	3077.5	3119.3	3016.8	2970.4
O96017	CHEK2	Serine/threonine-protein kinase Chk2	Homo sapiens	High	21	3797.3	3817.8	3349.8	3944.4	3888.3	3835.7	3755.9	4140.4	3713.1	3449.8
Q8IWX8	CHERP	Calcium homeostasis endoplasmic reticulum protein	Homo sapiens	High	24	4763.9	4811.2	4492.3	4764.6	4878	4975	4453.3	4973.2	4518.6	4579.2
Q96EP1	CHFR	E3 ubiquitin-protein ligase CHFR	Homo sapiens	High	1	14.8	18.1	16.7	17.8	14.3	20.9	23.2	18.2	18.6	17.9
Q15782	CHI3L2	Chitinase-3-like protein 2	Homo sapiens	High	7	568.6	595.9	628	599.9	396.2	583.6	508.5	515.7	497.7	545.6
Q9UKJ5	CHIC2	Cysteine-rich hydrophobic domain-containing protein 2	Homo sapiens	High	3	351.5	336	397.3	325.2	302.7	349.4	356.8	312.4	343.2	366.5
Q9BWS9	CHID1	Chitinase domain-containing protein 1	Homo sapiens	High	18	3472.6	3155.8	3269.8	3215.8	3517.2	3230.7	3625.1	3241.7	3511.8	3559.9
P35790	CHKA	Choline kinase alpha	Homo sapiens	High	7	357.1	384.1	384.8	432.2	484.2	442.7	371.1	405.3	407.3	445.9
Q9Y259	CHKB	Choline/ethanolamine kinase	Homo sapiens	High	3	221.8	222	258.8	235.4	231.7	283.3	234.8	237.9	230.7	255.4
P24386	CHM	Rab proteins geranylgeranyltransferase component A 1	Homo sapiens	High	19	1248.1	1275.5	1358.4	1305.8	1237.4	1322.6	1265	1221	1257.7	1246.7
P26374	CHML	Rab proteins geranylgeranyltransferase component A 2	Homo sapiens	High	21	1838.6	1867.7	1952.9	1876.1	1816.8	2084	1917.9	1768.8	1909.4	1922.6
Q9HD42	CHMP1A	Charged multivesicular body protein 1a	Homo sapiens	High	9	2498.2	2421.6	2549.4	2419.5	2695.5	2349.3	2773.3	2430.4	2499.7	2628.3
Q7LBR1	CHMP1B	Charged multivesicular body protein 1b	Homo sapiens	High	4	1876.7	1649.4	1655.1	1687.8	1760.4	1699.6	1740.3	1618.5	1827.7	1757.8
O43633	CHMP2A	Charged multivesicular body protein 2a	Homo sapiens	High	13	3486.1	3089.2	2686.2	3125.9	3751	3034.2	3291	3558.7	3344.3	3020.1
Q9UQN3	CHMP2B	Charged multivesicular body protein 2b	Homo sapiens	High	6	1104.1	1154.9	1207.9	1046.7	1226.9	1178.1	1146.5	1041	1123.9	1245.5
Q9Y3E7	CHMP3	Charged multivesicular body protein 3	Homo sapiens	High	7	1014.6	1086.3	1062.1	1073.7	1149.2	1121.3	1159.3	1062.5	1029.4	1012.4
Q9BY43	CHMP4A	Charged multivesicular body protein 4a	Homo sapiens	High	11	2808.3	2983	3097.7	2981.5	2966.9	3297.1	2927.8	2770.8	2878.5	2998.2
Q9H444	CHMP4B	Charged multivesicular body protein 4b	Homo sapiens	High	17	4895.5	5384.8	4553.9	5077.8	4950.7	4553.7	5081.1	5602.6	4794.2	4639.2
Q9NZZ3	CHMP5	Charged multivesicular body protein 5	Homo sapiens	High	9	2913.3	3083.4	3795.4	2952.5	3156.4	2770.3	3537.4	3021.6	3132.4	3677
Q96FZ7	CHMP6	Charged multivesicular body protein 6	Homo sapiens	High	9	1030.6	1082.3	1143.1	1035.7	1057.9	1072.1	1015.1	986.7	1012.2	1046.4
Q8WUX9	CHMP7	Charged multivesicular body protein 7	Homo sapiens	High	19	1840.3	1853.9	2109.7	1825.6	1949.9	1842.5	1979.1	1757.6	1839.3	1948.3
Q9UHD1	CHORDC1	Cysteine and histidine-rich domain-containing protein 1	Homo sapiens	High	27	5932.5	5213.4	5336	5513.4	6586	5199.5	5878.4	5501.3	5981.3	6057.1
Q99653	CHP1	Calcineurin B homologous protein 1	Homo sapiens	High	9	370.7	465.5	428.4	441.9	381.8	459.3	399.6	435.8	389	410.3
Q9P2E5	CHPF2	Chondroitin sulfate glucuronyltransferase	Homo sapiens	High	5	34.9	41.7	47.2	38.8	39.6	41.9	42	34.5	35.2	43.7
Q8WUD6	CHPT1	Cholinephosphotransferase 1	Homo sapiens	High	2	96	112.3	94.5	101.1	105.3	104.6	106.7	104.7	101.3	97.2
Q9NRG0	CHRAC1	Chromatin accessibility complex protein 1	Homo sapiens	High	6	399.6	324.9	160.7	331.3	386	305.5	251.6	408	333.9	275.8
P20309	CHRM3	Muscarinic acetylcholine receptor M3	Homo sapiens	High	1	76	53.8	49.8	69.4	72.6	49.6	62.6	55.1	75.5	51.1
P17787	CHRNB2	Neuronal acetylcholine receptor subunit beta-2	Homo sapiens	Medium	1	76.4	61.8	27.1	60.1	78.8	67.8	50.3	71.6	69.7	51.6
O43529	CHST10	Carbohydrate sulfotransferase 10	Homo sapiens	High	4	311.3	319.2	346	335.6	293.3	336.6	378.7	321.8	333.2	352.6
Q9NPF2	CHST11	Carbohydrate sulfotransferase 11	Homo sapiens	High	10	918.4	892.6	1028.4	902.7	778.5	914.3	944	927.1	949.2	993.5
Q8NCH0	CHST14	Carbohydrate sulfotransferase 14	Homo sapiens	High	7	551.2	594.9	719.5	644.7	544.1	600.2	646.6	613.5	614.5	644.2
Q9Y4C5	CHST2	Carbohydrate sulfotransferase 2	Homo sapiens	High	4	468.9	499.2	408.3	459.1	529.8	490.2	445.1	540.5	494.3	446.2
Q8WVB6	CHTF18	Chromosome transmission fidelity protein 18 homolog	Homo sapiens	High	24	2486.4	2250.7	2239	2332.9	2489.1	2284.6	2350	2386.8	2494.6	2353.7
P0CG13	CHTF8	Chromosome transmission fidelity protein 8 homolog	Homo sapiens	High	4	296.7	269.9	211.2	286.2	279.7	270.5	230.5	302.1	301.8	245.3
Q9Y3Y2	CHTOP	Chromatin target of PRMT1 protein	Homo sapiens	High	2	311.7	407.6	458.8	372.4	262.6	396.7	385.4	383.6	329.4	373
O15111	CHUK	Inhibitor of nuclear factor kappa-B kinase subunit alpha	Homo sapiens	High	33	5876	5759.4	5578.1	5977.9	6033.6	5984.3	6025.4	5962.7	5950.4	5671.1
Q8WUH1	CHURC1	Protein Churchill	Homo sapiens	High	5	677.3	677.1	753.7	745.7	614.5	831.2	621.3	698.7	706	675.8
O76071	CIAO1	Probable cytosolic iron-sulfur protein assembly protein CIAO1	Homo sapiens	High	9	493.1	518.3	692.2	571.2	603.7	534.7	629.6	514.1	534.4	582.3
Q6FI81	CIAPIN1	Anamorsin	Homo sapiens	High	17	3613.3	3419	3307.7	3462.1	3633.2	3332.9	3360.9	3613.6	3512.4	3397.5
Q99828	CIB1	Calcium and integrin-binding protein 1	Homo sapiens	High	10	477.7	472.6	566.9	465.7	454.7	445.7	537.1	485.4	505.3	507.1
Q96RK0	CIC	Protein capicua homolog	Homo sapiens	High	4	64.1	88.1	83.6	85	73	103.3	72.2	75.5	71.6	71.1
I3L2J0	CIC	Protein capicua homolog	Homo sapiens	Medium	2	103.2	114.6	110.8	112	101.4	132.9	93.8	101.3	104.7	104.2
Q9BW66	CINP	Cyclin-dependent kinase 2-interacting protein	Homo sapiens	High	7	351.3	334.9	454.5	366.6	383.1	364.3	397.1	341.8	380.9	435.8
Q86X95	CIR1	Corepressor interacting with RBPJ 1	Homo sapiens	High	13	823.7	760.8	842.1	874.6	654	811.6	723.4	896.8	800	791.4
Q14011	CIRBP	Cold-inducible RNA-binding protein	Homo sapiens	High	9	1528.7	1504	1914.1	1455.5	1721.6	1509.6	1968.3	1568.9	1698.6	1799.5
Q9NZ45	CISD1	CDGSH iron-sulfur domain-containing protein 1	Homo sapiens	High	5	1611.2	1567.8	1242.8	1575.9	1861.5	1544.1	1449.8	1670.3	1573	1453.1
Q8N5K1	CISD2	CDGSH iron-sulfur domain-containing protein 2	Homo sapiens	High	7	979.1	1202.8	1072.8	1109.6	1029.6	1139.3	1081.5	1141	898	960.3
P0C7P0	CISD3	CDGSH iron-sulfur domain-containing protein 3, mitochondrial	Homo sapiens	High	4	927.8	829.8	846.8	846.6	955.4	898.7	876.1	847	934.8	852.6
O14578	CIT	Citron Rho-interacting kinase	Homo sapiens	High	61	4760.1	4744.8	5072.1	4772.6	5303.2	4846.9	4867.8	4640.8	4766.8	4970.1
Q9ULV3	CIZ1	Cip1-interacting zinc finger protein	Homo sapiens	High	22	2186.2	2183.4	2389.2	2228.8	1998.2	2284.4	2226.2	2116.3	2267.4	2266.9
Q8WWK9	CKAP2	Cytoskeleton-associated protein 2	Homo sapiens	High	22	2408.9	2386	2257.9	2510.8	4822.6	2831.4	2436.6	2657.9	2355.1	2381.8
Q8IYA6	CKAP2L	Cytoskeleton-associated protein 2-like	Homo sapiens	High	19	1542.5	1427.8	1536.5	1468.3	2582.9	1568.7	1569.4	1558.4	1610.2	1664
Q07065	CKAP4	Cytoskeleton-associated protein 4	Homo sapiens	High	18	1183.8	1300	1473.2	1273.1	1253	1324.1	1390.1	1204.9	1191.9	1398.5
Q14008	CKAP5	Cytoskeleton-associated protein 5	Homo sapiens	High	111	23488.8	22515.9	23408.9	22795.1	28268.5	23057.7	23599.3	23223.4	23061.3	23659.5
P61024	CKS1B	Cyclin-dependent kinases regulatory subunit 1	Homo sapiens	High	6	2407.4	2529.9	2126.6	3013.2	2351.8	3076.6	2176.9	3023.1	2523.6	2335.3
P33552	CKS2	Cyclin-dependent kinases regulatory subunit 2	Homo sapiens	High	4	602	626.4	893.4	735.4	715.8	761.8	703.2	680.3	659.1	730.5
Q7Z460-3	CLASP1	Isoform 3 of CLIP-associating protein 1	Homo sapiens	High	12	21.1	18.7	28.3	23.5	16.6	18.6	26.4	21.6	22	22.4
Q7Z460	CLASP1	CLIP-associating protein 1	Homo sapiens	High	55	9125.8	9111.9	9168.1	9074.5	9514.4	9367.5	9079.5	9118.9	9120.1	9164.7
O75122-3	CLASP2	Isoform 3 of CLIP-associating protein 2	Homo sapiens	High	9	441.9	493.3	535	466.4	474.8	488.7	518.4	435.4	470	493.6
O75122	CLASP2	CLIP-associating protein 2	Homo sapiens	High	44	4892.8	4524.2	4281	4641.1	4621.7	4663.7	4442.3	4711.5	4759.8	4612.5
Q8N2M8	CLASRP	CLK4-associating serine/arginine rich protein	Homo sapiens	High	4	543.6	641.5	592.5	573.2	481	677.4	544.5	630.6	493	530.7
Q96S66	CLCC1	Chloride channel CLIC-like protein 1	Homo sapiens	High	12	967.8	991.9	1197.9	999.3	930.3	1066.8	1079.5	916.3	982.5	1054.6
P51790	CLCN3	H(+)/Cl(-) exchange transporter 3	Homo sapiens	High	6	757	844.3	880	859.6	786.5	934.3	756.6	796.5	733	788.7
P51795	CLCN5	H(+)/Cl(-) exchange transporter 5	Homo sapiens	High	2	269.8	235.9	290.5	233.8	307.2	244.1	273.3	254.1	300.2	315.5
P51797	CLCN6	Chloride transport protein 6	Homo sapiens	High	3	153.3	181.8	186.4	163.4	142.9	162.8	153.9	152.3	156.2	167.2
P51798	CLCN7	H(+)/Cl(-) exchange transporter 7	Homo sapiens	High	11	597.5	623	724.2	630.3	617.3	656.1	599.4	626.6	626	636.3
P56749	CLDN12	Claudin-12	Homo sapiens	Medium	1	25.8	23.2	36.2	29.2	33.2	31.8	30.5	21	27.5	30.3
Q9NY35	CLDND1	Claudin domain-containing protein 1	Homo sapiens	High	4	552.2	601.8	715.4	566.4	469.4	628.8	619.2	564.5	610.1	622.6
Q2KHT3	CLEC16A	Protein CLEC16A	Homo sapiens	High	14	485.1	465	437.4	452.4	465.2	476.6	452.4	484.3	476	468.1
O14967	CLGN	Calmegin	Homo sapiens	Medium	1	11.7	11.5	14.1	12.5	10.2	10.9	14	11.7	9	14.4
O00299	CLIC1	Chloride intracellular channel protein 1	Homo sapiens	High	18	3094.8	2981.1	2822.8	3232.1	3046	3073.5	2771.8	3064.6	3294.3	3066.1
Q9Y696	CLIC4	Chloride intracellular channel protein 4	Homo sapiens	High	8	448.6	464.5	504	491.4	503.5	565.3	466.9	444.7	472.3	519.8
Q9NZA1	CLIC5	Chloride intracellular channel protein 5	Homo sapiens	High	1	101.7	117.8	135.5	108.9	113.2	125.6	159.2	101	115.1	124.6
Q14677	CLINT1	Clathrin interactor 1	Homo sapiens	High	23	4152.6	4265.8	4957	4200.5	4080.5	4273.1	4655.8	3957.7	4151.4	4538.3
Q14677-3	CLINT1	Isoform 3 of Clathrin interactor 1	Homo sapiens	High	4	668.6	698.9	755.3	668	639.4	760.5	698.9	646.9	682.1	659.2
P30622-2	CLIP1	Isoform 3 of CAP-Gly domain-containing linker protein 1	Homo sapiens	Medium	13	591.9	790.2	774.7	725.2	685.7	795	726.4	730.5	637.2	720.3
P30622	CLIP1	CAP-Gly domain-containing linker protein 1	Homo sapiens	High	65	6721.9	6816.3	7164.8	6760.2	7019.5	7106.6	6716.9	6463.5	6714.5	7281.3
P49759	CLK1	Dual specificity protein kinase CLK1	Homo sapiens	High	8	624.7	524.6	557.4	585.8	625.7	540.4	530.6	544.7	651.3	578.5
P49760	CLK2	Dual specificity protein kinase CLK2	Homo sapiens	High	11	819.5	871.4	810.8	840	648.8	849.3	892	815.8	814.2	800.1
P49761	CLK3	Dual specificity protein kinase CLK3	Homo sapiens	High	10	624.7	624.8	732.3	653	616.3	689.1	718	635.4	652.7	722.1
Q9HAZ1	CLK4	Dual specificity protein kinase CLK4	Homo sapiens	High	1	150.8	129.6	109	159.3	151.8	146.7	111.1	155.1	173.7	135.3
Q13286	CLN3	Battenin	Homo sapiens	High	3	23.2	26.2	29.4	28.2	28	14.9	33.1	31.8	28.9	25.7
O75503	CLN5	Ceroid-lipofuscinosis neuronal protein 5	Homo sapiens	High	6	507.6	539.2	443.3	531.4	542.1	518.2	475.4	563.3	473	436.4
Q9UBY8	CLN8	Protein CLN8	Homo sapiens	High	2	339.2	400.5	392.9	384.8	386.4	409.4	413.2	370.1	336.2	378.4
P54105	CLNS1A	Methylosome subunit pICln	Homo sapiens	High	12	1550.7	1553.1	1746.6	1624.3	1644.6	1595.1	1548.1	1601.4	1522.8	1638.8
Q92989	CLP1	Polyribonucleotide 5'-hydroxyl-kinase Clp1	Homo sapiens	High	12	1468.6	1378.9	1361.5	1428.5	1501.1	1514.2	1387.1	1445.3	1444.7	1355.4
Q9H078	CLPB	Caseinolytic peptidase B protein homolog	Homo sapiens	High	30	4220.7	4270.2	4876.4	4360.1	4393.2	4365.8	4482.1	4091.8	4313.7	4757.9
Q16740	CLPP	ATP-dependent Clp protease proteolytic subunit, mitochondrial	Homo sapiens	High	11	2399.7	2506.5	2780.3	2551.8	2518.9	2621.7	2555.5	2332.6	2486.4	2531.5
O96005	CLPTM1	Cleft lip and palate transmembrane protein 1	Homo sapiens	High	10	657.6	693.4	716.1	666.1	733.3	723.5	675.3	664.8	669.7	722
Q96KA5	CLPTM1L	Cleft lip and palate transmembrane protein 1-like protein	Homo sapiens	High	12	1345	1429.8	1477.2	1383.3	1477.9	1448.2	1423.8	1400.2	1449.2	1540.3
O76031	CLPX	ATP-dependent Clp protease ATP-binding subunit clpX-like, mitochondrial	Homo sapiens	High	32	4711.6	4412.9	3782.4	4602	4651.4	4531.2	4164.3	4696.9	4532.5	4270
Q9HAW4	CLSPN	Claspin	Homo sapiens	High	27	3198.6	3208.9	3026.9	3400.2	2396	3679.2	2993.5	3699.8	3213.9	3060
O94985	CLSTN1	Calsyntenin-1	Homo sapiens	High	5	508.7	489	497.5	526.9	430	545	530.9	534.7	503.5	513.5
Q9BQT9	CLSTN3	Calsyntenin-3	Homo sapiens	High	7	303.5	292.7	343.7	284.8	278.1	300.1	297.2	284.7	299.2	299.8
P09496-2	CLTA	Isoform Non-brain of Clathrin light chain A	Homo sapiens	Medium	1	70.8	100.2	100	100.4	76	89	74.5	97	74.3	84.9
P09496	CLTA	Clathrin light chain A	Homo sapiens	High	11	1784.7	2186.7	2097.6	2077.7	1822.6	2058.3	1996.5	2069.8	1778.4	1905.1
P09497	CLTB	Clathrin light chain B	Homo sapiens	High	9	2009.7	1943	1828.1	1953.9	2046.5	1937	1921.7	1999.2	1913.5	1852.2
Q00610	CLTC	Clathrin heavy chain 1	Homo sapiens	High	102	23107.4	21875.2	22950.2	22069.5	22847.2	22074.8	23093.2	22315.7	22684.3	22439.1
Q96AJ1	CLUAP1	Clusterin-associated protein 1	Homo sapiens	High	4	155.6	149.6	185	162.4	165.1	168.5	177.9	163.9	167.4	164.3
O75153	CLUH	Clustered mitochondria protein homolog	Homo sapiens	High	52	6089.9	6158.3	6918.5	6551	6515	6739.7	6422.9	6246.7	6104.9	6389.7
I3L2B0	CLUH	Clustered mitochondria protein homolog (Fragment)	Homo sapiens	High	9	813.8	755.6	967.2	825.5	900.3	847.4	883.3	718.4	876	970.9
Q8N0X4	CLYBL	Citrate lyase subunit beta-like protein, mitochondrial	Homo sapiens	High	10	830	815.1	752.4	810.5	872.3	777.4	817.9	818.7	847.2	815.4
Q8NFW8	CMAS	N-acylneuraminate cytidylyltransferase	Homo sapiens	High	23	3687.5	3887.2	3746.1	3666.2	3303.8	3970.8	3635.6	3799	3494	3359.4
Q7Z7K0	CMC1	COX assembly mitochondrial protein homolog	Homo sapiens	High	1	187.5	159.3	156.4	202.9	211.6	237.6	168.7	172.5	227.9	156.2
Q9NRP2	CMC2	COX assembly mitochondrial protein 2 homolog	Homo sapiens	High	3	464.6	515.9	517.8	519.1	510.9	504.7	509.5	465.2	490.2	526
Q8IY22	CMIP	C-Maf-inducing protein	Homo sapiens	High	7	433.2	452.4	524.6	457.2	405	460	517.5	439.8	444.4	524
P30085	CMPK1	UMP-CMP kinase	Homo sapiens	High	12	2148.9	2068.3	2459.8	1987.8	2266.7	1961.8	2152	2107.9	2185.5	2336.2
Q5EBM0	CMPK2	UMP-CMP kinase 2, mitochondrial	Homo sapiens	High	10	785.7	812.8	923	763.5	804.9	893.6	929.7	775.7	745.1	855.2
Q9BQ75	CMSS1	Protein CMSS1	Homo sapiens	High	11	1991.7	1702.5	1434.2	1685.1	1872.7	1769.2	1674.8	1862.7	1829.4	1599.2
Q8N1G2	CMTR1	Cap-specific mRNA (nucleoside-2'-O-)-methyltransferase 1	Homo sapiens	High	35	5390.7	5143.7	4849.6	4897.6	5040	5028.7	5089.9	5288.1	5230.8	5024
Q8IYT2	CMTR2	Cap-specific mRNA (nucleoside-2'-O-)-methyltransferase 2	Homo sapiens	High	9	631.9	685.2	621.1	670.8	635.9	678.1	621.7	650.6	627.3	641.2
P62633-4	CNBP	Isoform 4 of Cellular nucleic acid-binding protein	Homo sapiens	Medium	2	13.7	19.2	21.2	23.9	19.5	17.1	23.7	18.1	20.5	23.3
P62633	CNBP	Cellular nucleic acid-binding protein	Homo sapiens	High	10	1698.3	1413	2065.8	1622.8	1751.2	1473.4	1779.8	1558.5	2107.7	2258.6
Q96KP4	CNDP2	Cytosolic non-specific dipeptidase	Homo sapiens	High	36	6626.5	6795	7011.9	6938.6	6586.9	6931.5	6669.2	6674.6	6716.8	6906.5
O95406	CNIH1	Protein cornichon homolog 1	Homo sapiens	High	1	71.4	63.9	60.7	64.8	53.5	79.8	57.4	68.1	66.1	50.6
Q9P003	CNIH4	Protein cornichon homolog 4	Homo sapiens	High	1	252	232.1	287.5	246.8	258.1	275.5	245.5	227.5	251	283.2
Q8WXI2	CNKSR2	Connector enhancer of kinase suppressor of ras 2	Homo sapiens	High	4	164.6	170	157.4	155.4	150.9	152.1	177.1	173.5	180.4	174.7
Q99439	CNN2	Calponin-2	Homo sapiens	High	15	4440.3	4114.4	4142.9	4093.3	4214.1	3823	4402.3	4260.7	4322.7	4442.5
Q9H8M5	CNNM2	Metal transporter CNNM2	Homo sapiens	High	1	50.3	43	66.9	39.3	40.6	32.1	47.3	40.2	44.5	66.6
Q8NE01	CNNM3	Metal transporter CNNM3	Homo sapiens	High	18	1806.7	1784.1	1652.4	1924.4	1802.3	1848.2	1694.8	1947.1	1905.7	1723.7
Q6P4Q7	CNNM4	Metal transporter CNNM4	Homo sapiens	High	2	237.6	234.2	273.4	232.7	235	212.9	257.7	230.2	242.1	254.8
A5YKK6-2	CNOT1	Isoform 2 of CCR4-NOT transcription complex subunit 1	Homo sapiens	Medium	11	1563.6	1595.4	1419.9	1607.1	1540.2	1680	1465.5	1616.8	1464	1459.4
A5YKK6	CNOT1	CCR4-NOT transcription complex subunit 1	Homo sapiens	High	88	12119.6	12001.3	11816.3	11782.5	12054.7	12004.3	11973.5	12067.9	12130.5	11920.8
Q9H9A5	CNOT10	CCR4-NOT transcription complex subunit 10	Homo sapiens	High	27	3544.8	3697.8	3255.7	3746.4	3518.8	3822.2	3379.4	3694.6	3542.1	3497.1
Q9UKZ1	CNOT11	CCR4-NOT transcription complex subunit 11	Homo sapiens	High	8	1017.6	1083.3	904.6	1033.1	999	1090.2	996.7	1066.9	1003.4	975.7
Q9NZN8	CNOT2	CCR4-NOT transcription complex subunit 2	Homo sapiens	High	11	1250.4	1227.7	1281.4	1213	1100.7	1307.3	1224.3	1242.4	1205.9	1194.7
O75175	CNOT3	CCR4-NOT transcription complex subunit 3	Homo sapiens	High	19	2073.3	2359.8	2229.5	2361.9	2045.6	2324.4	2171.4	2379.8	1950.9	2091.6
O95628	CNOT4	CCR4-NOT transcription complex subunit 4	Homo sapiens	High	11	796.3	758.8	754.2	804.2	823.2	815.8	802	775.4	761	827.4
Q9ULM6	CNOT6	CCR4-NOT transcription complex subunit 6	Homo sapiens	High	3	224.1	254.5	283.3	251.8	205.1	248.6	253.3	227.7	228.6	260.9
Q96LI5	CNOT6L	CCR4-NOT transcription complex subunit 6-like	Homo sapiens	High	11	1429.6	1290.1	1176.8	1306.6	1316.5	1321.5	1215.7	1353.5	1414.3	1313
Q9UIV1	CNOT7	CCR4-NOT transcription complex subunit 7	Homo sapiens	High	13	1219.1	1134	983.8	1175.8	1205.1	1125.6	1131.5	1233.7	1231.3	1101.1
Q9UFF9	CNOT8	CCR4-NOT transcription complex subunit 8	Homo sapiens	High	7	149.7	140.1	154.2	158	117.5	158.1	151.8	136.3	140.7	164.2
P09543	CNP	2',3'-cyclic-nucleotide 3'-phosphodiesterase	Homo sapiens	High	26	5164.9	5425	5148.8	5224.5	5253.6	5219.4	5395.4	5530.8	5196	5096.1
Q9Y2B0	CNPY2	Protein canopy homolog 2	Homo sapiens	High	12	2245.5	2682.8	2750.1	2614.4	2424.1	2698.5	2563.4	2521.9	2134.4	2477.8
Q9BT09	CNPY3	Protein canopy homolog 3	Homo sapiens	High	12	2225.1	2237.9	1904.7	2225.7	2008.1	2233.5	2069.9	2259.3	2062.1	1785.2
Q8N129	CNPY4	Protein canopy homolog 4	Homo sapiens	High	4	337.2	382	350.2	373.5	333.9	381.9	332.1	365.1	324	333
Q6PJW8	CNST	Consortin	Homo sapiens	High	8	243.2	258	274.8	266.5	292.6	268.9	274.8	260.5	272.8	302
Q9NXG0	CNTLN	Centlein	Homo sapiens	High	9	438	419.4	461.4	381.5	444.3	392.8	388.7	449.7	483.3	335.7
Q7Z7A1	CNTRL	Centriolin	Homo sapiens	High	4	566.8	617.7	675.3	592.5	645.1	596.5	656.7	583.6	533.9	594
Q8N137	CNTROB	Centrobin	Homo sapiens	High	10	385.7	428.7	465.5	399.5	307	444	392.5	370	378.9	409.2
Q9GZY4	COA1	Cytochrome c oxidase assembly factor 1 homolog	Homo sapiens	High	6	527.4	411.3	401.9	417.6	503.6	397.6	452.9	410.1	531.5	505
Q9Y2R0	COA3	Cytochrome c oxidase assembly factor 3 homolog, mitochondrial	Homo sapiens	High	4	504.6	539.6	455.7	527.6	559.7	556.9	483.9	525.6	481.7	497.6
Q9NYJ1	COA4	Cytochrome c oxidase assembly factor 4 homolog, mitochondrial	Homo sapiens	High	3	224.3	179.8	195.2	188.4	279.6	172.6	254.7	167.8	191	215.5
Q5JTJ3	COA6	Cytochrome c oxidase assembly factor 6 homolog	Homo sapiens	High	1	264.4	279.7	333.7	275	269.9	284.6	273	252.7	243.5	287.6
Q96BR5	COA7	Cytochrome c oxidase assembly factor 7	Homo sapiens	High	10	1038	1169.8	1146	1081.2	1179.6	1048.4	1225.5	1132.2	1050.1	1129.3
Q13057	COASY	Bifunctional coenzyme A synthase	Homo sapiens	High	13	847.7	799.6	700.9	783.1	821.5	867.7	689.9	836.3	793.2	705.3
Q53SF7	COBLL1	Cordon-bleu protein-like 1	Homo sapiens	Medium	1	76.5	74.1	69.1	81.2	85.3	79.4	81.9	78.3	81.7	80.8
O43405	COCH	Cochlin	Homo sapiens	Medium	1	100.5	118.5	131.6	115	100.3	97.9	147	111	118.7	128.8
Q8WTW3	COG1	Conserved oligomeric Golgi complex subunit 1	Homo sapiens	High	37	3104	3048.4	3133.5	3156	3071.1	3206.8	3155.9	2988.1	3027.8	3077.7
Q14746	COG2	Conserved oligomeric Golgi complex subunit 2	Homo sapiens	High	32	2880.1	2866.8	2895	2891.7	2988.9	2927.5	2993.6	2786.5	2925.7	2954.1
Q96JB2	COG3	Conserved oligomeric Golgi complex subunit 3	Homo sapiens	High	33	2999.9	2986.5	3200.6	3035.1	3074.5	3271.6	3164.7	3020.1	3038.2	3156.6
Q9H9E3	COG4	Conserved oligomeric Golgi complex subunit 4	Homo sapiens	High	31	2720.6	2832.3	2997.4	2791.6	2779.6	2820.3	2889.3	2732.6	2713.9	2821.3
Q9UP83	COG5	Conserved oligomeric Golgi complex subunit 5	Homo sapiens	High	30	2413.3	2430.9	2277.6	2414	2507.5	2521.1	2391.2	2461.6	2447.7	2367.4
Q9UP83-2	COG5	Isoform 2 of Conserved oligomeric Golgi complex subunit 5	Homo sapiens	Medium	6	26.7	19.8	23.4	27.3	22.9	23.5	28.1	25.5	27.5	27.3
Q9Y2V7	COG6	Conserved oligomeric Golgi complex subunit 6	Homo sapiens	High	21	1747.7	1815.8	2129.2	1753.8	1792	1818.8	1907.3	1832.2	1750.5	1841.6
P83436	COG7	Conserved oligomeric Golgi complex subunit 7	Homo sapiens	High	31	4815.3	4436.9	4387.1	4525.4	4926	4694.4	4655.1	4503.6	4620.6	4713.4
Q96MW5	COG8	Conserved oligomeric Golgi complex subunit 8	Homo sapiens	High	11	567.4	648.9	599.3	662.9	612.4	726.8	594.6	700.5	614.1	600.9
P38432	COIL	Coilin	Homo sapiens	High	13	1139	1270.7	1222.7	1191	1128.9	1114.2	1195.1	1113.8	1177.7	1181.4
Q9Y5P4	COL4A3BP	Collagen type IV alpha-3-binding protein	Homo sapiens	High	35	2818.9	3105.6	3168.3	3067.5	2722.3	3192.8	2869.6	2895.4	2742.4	2790.3
A8TX70	COL6A5	Collagen alpha-5(VI) chain	Homo sapiens	Medium	1	12	12.3	9.8	9	12.4	7.6	11.4	14.8	12.3	11
Q14050	COL9A3	Collagen alpha-3(IX) chain	Homo sapiens	High	1	31	43	40	33.7	35.2	39.1	33.3	36.3	34.6	33.1
Q8NBJ5	COLGALT1	Procollagen galactosyltransferase 1	Homo sapiens	High	22	3038.6	3233.3	3555	3237.2	3201.3	3245.6	3358.8	3033.6	3088.4	3280.1
Q8N668	COMMD1	COMM domain-containing protein 1	Homo sapiens	High	6	416.9	348.2	420.9	358	445.3	390.8	374.8	376.2	396	436.4
Q9Y6G5	COMMD10	COMM domain-containing protein 10	Homo sapiens	High	8	570	499.1	454.5	546.8	538.5	545.2	463.3	549.9	555.2	489
Q86X83	COMMD2	COMM domain-containing protein 2	Homo sapiens	High	7	1099.3	1152	1165.6	1183.6	1122	1196.8	1193.8	1206.3	1134.5	1245.2
Q9UBI1	COMMD3	COMM domain-containing protein 3	Homo sapiens	High	8	893.5	809.1	961.8	856	894	817.7	961.8	786.4	909.9	994.9
Q9H0A8	COMMD4	COMM domain-containing protein 4	Homo sapiens	High	8	1348.6	1414.1	1434.4	1363.1	1434.8	1350.2	1553.8	1372.7	1305.1	1458.1
Q9GZQ3	COMMD5	COMM domain-containing protein 5	Homo sapiens	High	4	312.2	276	216.9	276.9	299	321.7	223.6	298.7	311.2	290.4
Q7Z4G1	COMMD6	COMM domain-containing protein 6	Homo sapiens	High	6	932.8	945.5	818.3	963.1	1029	1076	798	945.6	952.3	952.3
Q86VX2	COMMD7	COMM domain-containing protein 7	Homo sapiens	High	5	401.1	367.9	382.7	395.8	397.1	370.2	400	380.9	410.1	424.4
Q9NX08	COMMD8	COMM domain-containing protein 8	Homo sapiens	High	8	1372.8	1296.9	1054.7	1277.3	1361.9	1232.9	1180.2	1323.9	1210	1168.9
Q9P000	COMMD9	COMM domain-containing protein 9	Homo sapiens	High	9	1381.1	1286.8	1345.3	1283.2	1425.3	1344.7	1351.9	1317.6	1342.1	1406.8
P21964	COMT	Catechol O-methyltransferase	Homo sapiens	High	21	4085.2	3863.8	4168.7	3855.3	4354.6	3891.3	4260.9	3998.7	4060.2	4079.6
Q86VU5	COMTD1	Catechol O-methyltransferase domain-containing protein 1	Homo sapiens	High	3	85.3	78.7	120.4	85.7	91.8	86.9	93.4	78.7	88	97.2
P53621	COPA	Coatomer subunit alpha	Homo sapiens	High	72	15743.3	16271.1	15256.3	16063.1	15124.5	16412.8	15627.9	16489.8	15772.5	15081.3
P53618	COPB1	Coatomer subunit beta	Homo sapiens	High	53	13004.7	12976.7	12833.4	12979.7	12773.4	12808.7	12933.8	13351.8	12593.4	12326.6
P35606	COPB2	Coatomer subunit beta'	Homo sapiens	High	55	11147.9	11654.3	11629.5	11308.6	11153.2	11422	11632.1	11450.1	11046.3	11217
O14579	COPE	Coatomer subunit epsilon	Homo sapiens	High	17	3006.6	3061.3	3246	2932.1	2856.2	2942.1	3336.2	3192.1	2895.2	2995
Q9Y678	COPG1	Coatomer subunit gamma-1	Homo sapiens	High	44	9459.3	8941.9	8761	9166.3	9408.9	9165.4	8772.4	9401.4	9132.1	9205.6
Q9UBF2	COPG2	Coatomer subunit gamma-2	Homo sapiens	High	32	4665.1	4799.9	4806.6	4755.7	4650.5	5103.1	4627.3	4762.9	4736	4765.8
Q9NQ92	COPRS	Coordinator of PRMT5 and differentiation stimulator	Homo sapiens	High	1	24.2	36	25.5	27.7	34	30.3	22.5	24.2	29.1	30.1
P61201	COPS2	COP9 signalosome complex subunit 2	Homo sapiens	High	29	4340.5	3879	3615.8	3938.6	4369.3	4019.7	3799.1	4016.3	4134.2	4008
Q9UNS2	COPS3	COP9 signalosome complex subunit 3	Homo sapiens	High	22	4861.2	5309.7	5679.1	5022.1	5308.2	5255.6	5302.7	5033.4	4827.2	5630.7
Q9BT78	COPS4	COP9 signalosome complex subunit 4	Homo sapiens	High	32	6335.7	6164.8	6590.8	6265.3	6302.6	6429.3	6389.4	6160.1	6179.3	6642
Q92905	COPS5	COP9 signalosome complex subunit 5	Homo sapiens	High	19	3498.5	3146.5	3014.2	3269.8	3343	3274.2	3349.1	3454.4	3230.6	3244
Q7L5N1	COPS6	COP9 signalosome complex subunit 6	Homo sapiens	High	14	2829.2	2935.1	2850	2963.4	2833.1	3124.3	2954.5	3042.4	2644.8	2769.4
Q9UBW8	COPS7A	COP9 signalosome complex subunit 7a	Homo sapiens	High	10	1227	1372.6	1504.3	1347.6	1477.9	1614.7	1474.6	1539.2	1341.3	1465.9
Q9H9Q2	COPS7B	COP9 signalosome complex subunit 7b	Homo sapiens	High	9	1197.1	1127.2	1384.4	1220	1133	1251	1134.6	1078	1183.3	1252.1
Q99627	COPS8	COP9 signalosome complex subunit 8	Homo sapiens	High	9	1718.6	1324.9	859.3	1514.9	1772.7	1426.5	1119.1	1691	1591.9	1260.6
Q8WXC6	COPS9	COP9 signalosome complex subunit 9	Homo sapiens	High	2	34.9	37.8	37.7	41	33.7	42.7	31.3	30.5	39.3	36.5
P61923	COPZ1	Coatomer subunit zeta-1	Homo sapiens	High	8	1336.7	1406.6	1624.5	1406.6	1382.1	1321.9	1542.9	1252.9	1375.5	1462.9
Q96H96	COQ2	4-hydroxybenzoate polyprenyltransferase, mitochondrial	Homo sapiens	Medium	1	50.2	53.9	132.5	51	59.3	50.4	69.9	52.7	55.4	98.1
Q9NZJ6	COQ3	Ubiquinone biosynthesis O-methyltransferase, mitochondrial	Homo sapiens	High	10	1328.8	1262.7	1186.2	1331.8	1312.7	1258.8	1246.9	1323.5	1331.8	1273.5
Q9Y3A0	COQ4	Ubiquinone biosynthesis protein COQ4 homolog, mitochondrial	Homo sapiens	High	5	292.6	216.9	246.8	208.1	227.9	251.6	285.5	238	266	255.1
Q5HYK3	COQ5	2-methoxy-6-polyprenyl-1,4-benzoquinol methylase, mitochondrial	Homo sapiens	High	15	2031.8	1959.2	2018	1847	1988.4	1889.5	2122	1902.8	2085.4	2007.4
Q9Y2Z9	COQ6	Ubiquinone biosynthesis monooxygenase COQ6, mitochondrial	Homo sapiens	High	13	1765.2	1357	1043	1413.2	1624	1305.5	1322.5	1557.7	1518.3	1296
Q99807	COQ7	5-demethoxyubiquinone hydroxylase, mitochondrial	Homo sapiens	High	6	525.9	526.7	568.3	495	595.2	596.2	585.8	548.8	545.8	603.6
Q8NI60	COQ8A	Atypical kinase COQ8A, mitochondrial	Homo sapiens	High	16	1333.2	1253.7	1292.4	1257.9	1413.5	1328.7	1250.3	1254.1	1379.5	1340.9
Q96D53	COQ8B	Atypical kinase COQ8B, mitochondrial	Homo sapiens	High	12	562.4	603.7	691.3	548.1	558	615.6	621.7	549.9	575.4	605.6
O75208	COQ9	Ubiquinone biosynthesis protein COQ9, mitochondrial	Homo sapiens	High	8	1360.6	1308.6	1382.8	1248.8	1313.6	1267.7	1336.1	1273.1	1314.4	1340.9
P31146	CORO1A	Coronin-1A	Homo sapiens	High	32	9980.5	9890.3	10123.2	9507.4	9263.4	8687.5	10108.1	9575.9	9552	9462.6
Q9BR76	CORO1B	Coronin-1B	Homo sapiens	High	13	1753.9	2023.3	1773.1	1968.1	1961.3	2135.3	1791.3	2077.8	1793.4	1771.7
Q9ULV4	CORO1C	Coronin-1C	Homo sapiens	High	27	4385.9	4110	4035.3	4009.8	4297.5	3921.9	4305.6	4185.5	4126.6	4086.8
Q92828	CORO2A	Coronin-2A	Homo sapiens	High	4	238.7	352.5	327.7	306.4	276.5	306.2	358.8	353.1	267.2	314.5
P57737	CORO7	Coronin-7	Homo sapiens	High	33	4901.2	5443.9	5240.6	5328.6	4420.4	5261.4	5076.5	5403	4741.5	4786.2
Q14019	COTL1	Coactosin-like protein	Homo sapiens	High	3	209	207.8	224.9	191.4	197.7	187	206.3	189.2	181.7	203.3
Q12887	COX10	Protoheme IX farnesyltransferase, mitochondrial	Homo sapiens	High	2	142.1	223.4	168.2	221.2	149.3	231.4	137.4	188.3	147.9	155.1
Q9Y6N1	COX11	Cytochrome c oxidase assembly protein COX11, mitochondrial	Homo sapiens	High	5	449.8	391	338.5	388.2	519.8	429.5	372.1	420.6	479.4	457
Q7KZN9	COX15	Cytochrome c oxidase assembly protein COX15 homolog	Homo sapiens	High	7	958.6	917.1	1012.5	945.6	976.6	1043.3	974.7	911.5	1083	1021.7
Q9P0S2	COX16	Cytochrome c oxidase assembly protein COX16 homolog, mitochondrial	Homo sapiens	High	2	93.5	103.8	123.2	103	94.9	106.8	100.1	89.6	92.6	109.5
Q14061	COX17	Cytochrome c oxidase copper chaperone	Homo sapiens	High	2	259.5	177.6	271.8	212.2	276.8	154.8	268.5	189.5	251.2	306.3
Q8N8Q8	COX18	Mitochondrial inner membrane protein COX18	Homo sapiens	High	5	366.3	399.5	361.2	403.2	368.6	434.4	361.8	392.1	389.6	368.4
Q49B96	COX19	Cytochrome c oxidase assembly protein COX19	Homo sapiens	High	2	666	704.7	690.6	736.8	646.9	862.6	629.9	656.5	668.2	660
Q5RI15	COX20	Cytochrome c oxidase protein 20 homolog	Homo sapiens	High	5	435.1	490	442.8	458.8	454.4	485.4	466.5	465.6	440.9	428.9
P13073	COX4I1	Cytochrome c oxidase subunit 4 isoform 1, mitochondrial	Homo sapiens	High	12	5223.5	5407.2	6128.8	5329.2	5721.6	5335.4	6005.9	5354.9	5537	5764.9
P20674	COX5A	Cytochrome c oxidase subunit 5A, mitochondrial	Homo sapiens	High	7	1494.3	1601.1	1666.5	1545.2	1623.4	1532.9	1681.9	1516	1475.5	1631.3
P10606	COX5B	Cytochrome c oxidase subunit 5B, mitochondrial	Homo sapiens	High	10	4826.6	5748.3	5098.9	5712	5073.3	5674.8	4684.3	5738.6	4568.2	4441.3
P12074	COX6A1	Cytochrome c oxidase subunit 6A1, mitochondrial	Homo sapiens	High	2	179.8	173.8	135.9	168.8	170.2	190	150.1	197.8	158	121.7
P14854	COX6B1	Cytochrome c oxidase subunit 6B1	Homo sapiens	High	7	587.8	679.1	671.2	644.2	555.5	519.9	752.3	676.5	491	562
P09669	COX6C	Cytochrome c oxidase subunit 6C	Homo sapiens	High	9	2965.4	2546.1	1851	2515.4	3041.3	2186.4	2198.5	2749	2525.1	2224.9
P14406	COX7A2	Cytochrome c oxidase subunit 7A2, mitochondrial	Homo sapiens	High	3	818.3	869.6	886.9	977.4	882.2	689	968.8	640.2	1019.9	945.4
O14548	COX7A2L	Cytochrome c oxidase subunit 7A-related protein, mitochondrial	Homo sapiens	High	6	995.3	1001.9	922.5	1023.1	1054	1012.9	1005.2	1035.6	962.2	946.2
P24311	COX7B	Cytochrome c oxidase subunit 7B, mitochondrial	Homo sapiens	Medium	2	497.7	582.4	653.8	592.6	548.6	571.5	590.6	547.9	493.7	518.8
P15954	COX7C	Cytochrome c oxidase subunit 7C, mitochondrial	Homo sapiens	High	4	589.9	501.8	527.2	502.5	616.4	500.3	562.7	490.8	623.4	568.3
P10176	COX8A	Cytochrome c oxidase subunit 8A, mitochondrial	Homo sapiens	High	1	1087.6	1059.7	1089	1087.8	1141.1	1092.2	1256	1055.1	1120.7	1064.8
O75976	CPD	Carboxypeptidase D	Homo sapiens	High	25	1585	1578.9	1653.4	1655.2	1619	1661.9	1644.6	1680.6	1688.1	1716.3
Q9BZB8	CPEB1	Cytoplasmic polyadenylation element-binding protein 1	Homo sapiens	High	1	38.4	37.7	45.6	39.8	50.2	40.7	43.7	49.5	39.4	54.2
Q8NE35	CPEB3	Cytoplasmic polyadenylation element-binding protein 3	Homo sapiens	High	2	126.4	112.6	75.7	122.3	117	119.2	98.3	125	121.7	100.2
Q17RY0	CPEB4	Cytoplasmic polyadenylation element-binding protein 4	Homo sapiens	High	1	61.3	59.8	35.4	63.7	78.3	66.2	47	70.6	68.8	54.9
Q99829	CPNE1	Copine-1	Homo sapiens	High	18	2973.6	2846.9	2911.6	2818.2	2852.3	2736.8	2965.9	2843	2808.7	2867
O75131	CPNE3	Copine-3	Homo sapiens	High	19	3768.6	4021.7	3981.4	3833.1	3869.1	3831.9	4011.8	3765.9	3796.2	3757.5
Q9UBL6	CPNE7	Copine-7	Homo sapiens	High	3	158.1	122.6	107.7	120	142.4	122.2	128	118.9	145.3	151.5
P36551	CPOX	Oxygen-dependent coproporphyrinogen-III oxidase, mitochondrial	Homo sapiens	High	20	2889.7	2736	3196	2819.7	2983.8	2883.6	3068.7	2908.9	2843.5	3132.8
Q9BRF8	CPPED1	Serine/threonine-protein phosphatase CPPED1	Homo sapiens	High	5	158.6	190.9	222.3	174.1	202.4	178.4	182.5	167.3	176.9	203.6
Q9Y646	CPQ	Carboxypeptidase Q	Homo sapiens	High	3	228.8	217.4	161.6	222.2	227.2	227.5	181.6	258.2	212.2	181.9
P31327	CPS1	Carbamoyl-phosphate synthase [ammonia], mitochondrial	Homo sapiens	High	32	2784.2	2724.1	2650	2721.5	2763.2	2804	2643.4	2671.3	2672.9	2725.2
Q10570	CPSF1	Cleavage and polyadenylation specificity factor subunit 1	Homo sapiens	High	50	5342.1	5208.4	5282.5	5207.8	5282.2	5248.8	5424.5	5219.7	5413.6	5232.4
Q9P2I0	CPSF2	Cleavage and polyadenylation specificity factor subunit 2	Homo sapiens	High	41	5970.3	6026.1	6479	5867	5999	5992.9	6457.4	5704.2	5808.9	6490.8
Q9UKF6	CPSF3	Cleavage and polyadenylation specificity factor subunit 3	Homo sapiens	High	29	5654.1	5759.4	4884.3	5897.8	5831.9	6270.3	5321.9	6166.8	5495.1	5333.7
Q5TA45	CPSF3L	Integrator complex subunit 11	Homo sapiens	High	17	2587	2386.7	2481.9	2454.7	2705.7	2602.6	2567.7	2394.9	2709.4	2610.3
O95639	CPSF4	Cleavage and polyadenylation specificity factor subunit 4	Homo sapiens	High	12	1911.5	1996.4	1794.6	2042.6	1918.1	2058.9	1857.8	2154	1739.2	1793
Q16630-2	CPSF6	Isoform 2 of Cleavage and polyadenylation specificity factor subunit 6	Homo sapiens	Medium	4	1335.4	1414	1237.3	1483	1384.8	1666.1	1326.4	1449.4	1357.9	1179.2
Q16630	CPSF6	Cleavage and polyadenylation specificity factor subunit 6	Homo sapiens	High	15	3480	3205.8	2223.2	3164.6	3417.5	3111	2689.7	3865.4	3068.3	2479.9
Q8N684	CPSF7	Cleavage and polyadenylation specificity factor subunit 7	Homo sapiens	High	13	1705.2	1684.7	1625.4	1693.1	1687.2	1582.6	1684.3	1654.7	1614.4	1614.8
P50416	CPT1A	Carnitine O-palmitoyltransferase 1, liver isoform	Homo sapiens	High	27	3392.9	3615.2	4549.4	3507.2	3501.4	3765.6	3949.8	3449.8	3609	4101.5
P23786	CPT2	Carnitine O-palmitoyltransferase 2, mitochondrial	Homo sapiens	High	33	5431.5	5558.3	5944.4	5316.5	5518.4	5421.9	5741.7	5366.5	5405.9	5568.4
Q5TA50	CPTP	Ceramide-1-phosphate transfer protein	Homo sapiens	High	2	63.3	105.4	76.3	95.5	71.8	94.2	84.4	83.4	58.1	71
Q96SM3	CPXM1	Probable carboxypeptidase X1	Homo sapiens	High	2	26	24.4	34.6	24.6	22	22.1	22.8	23.1	30.5	29.2
Q9BSW2-2	CRACR2A	Isoform 2 of EF-hand calcium-binding domain-containing protein 4B	Homo sapiens	High	5	164.4	201.7	210.8	201.8	189.3	191.8	210.4	198.8	178.2	216.6
Q9BSW2	CRACR2A	EF-hand calcium-binding domain-containing protein 4B	Homo sapiens	High	15	1001.6	1173.7	1119.7	1078.3	1075	1246.2	1125.6	1142.1	1006.4	1024.5
P78560	CRADD	Death domain-containing protein CRADD	Homo sapiens	High	4	260.1	298	303.4	332.3	288.4	405.8	239.2	247.5	246.6	284.2
Q96RY5	CRAMP1	Protein cramped-like	Homo sapiens	High	9	402.1	422.8	476	451.3	376.3	452.5	470.6	427.2	409.1	443.8
Q96SW2	CRBN	Protein cereblon	Homo sapiens	High	13	1234.8	1131.9	1044.6	1234.6	1215.7	1251.9	1023.9	1212.7	1288.3	1147.5
O75575	CRCP	DNA-directed RNA polymerase III subunit RPC9	Homo sapiens	High	4	203.9	206.1	198.3	212	246.2	217.7	220.7	232.7	220	216.8
P16220	CREB1	Cyclic AMP-responsive element-binding protein 1	Homo sapiens	High	5	910	914.4	1049.8	901.3	867.5	905.5	1018.3	858.6	968	1019
Q8TEY5	CREB3L4	Cyclic AMP-responsive element-binding protein 3-like protein 4	Homo sapiens	High	1	35.8	41.8	48.4	39.4	37.7	44.5	42.6	37.3	35	35.3
Q92793	CREBBP	CREB-binding protein	Homo sapiens	High	31	5607.9	5187.9	5022	5339.3	5386	5421.1	5051.5	5139.8	5444.4	5300.5
O75629	CREG1	Protein CREG1	Homo sapiens	High	2	133.8	123.2	104.3	159	181.5	153.7	109.6	171.1	136.1	139.7
Q96HD1	CRELD1	Cysteine-rich with EGF-like domain protein 1	Homo sapiens	Medium	1	101	96.1	86.6	87	102.8	82.8	107.9	113.3	98.4	96.2
Q6UXH1	CRELD2	Cysteine-rich with EGF-like domain protein 2	Homo sapiens	High	2	291.9	338.2	334.4	360.6	306.8	413	324.5	292.9	282.2	292.1
Q03060	CREM	cAMP-responsive element modulator	Homo sapiens	Medium	1	85.2	90.7	109	100.7	100.3	84.5	112.2	81.6	88.3	105.2
P50238	CRIP1	Cysteine-rich protein 1	Homo sapiens	High	2	970.2	679.9	839.1	773.8	894.7	802.2	659	785.8	1031.6	900.7
Q9P021	CRIPT	Cysteine-rich PDZ-binding protein	Homo sapiens	High	4	514.6	413.4	319.8	495	439.3	484.8	393.1	543.1	566.6	482.8
Q9H336	CRISPLD1	Cysteine-rich secretory protein LCCL domain-containing 1	Homo sapiens	High	1	65.7	34.7	26.7	37.5	54	32.1	41.9	41.9	50.9	47
P46108	CRK	Adapter molecule crk	Homo sapiens	High	11	887	852.4	968.1	873.5	996.9	912.3	885.1	842.3	910.7	934.1
P46109	CRKL	Crk-like protein	Homo sapiens	High	18	3244.3	2988.7	3215.6	2965.9	3104.8	2857.2	3110.8	3119.5	3121.3	3218.5
Q8IUI8	CRLF3	Cytokine receptor-like factor 3	Homo sapiens	High	10	1421.5	1314.8	1533.2	1344	1416.2	1260.2	1419.7	1140.9	1354.8	1471.8
Q9UJA2	CRLS1	Cardiolipin synthase (CMP-forming)	Homo sapiens	High	2	105.1	90.4	45.3	112.3	98	76.9	66.1	102.3	108.6	62.5
Q9BZJ0	CRNKL1	Crooked neck-like protein 1	Homo sapiens	High	39	6005.8	5875.9	5468.1	5997.7	6056.6	6249.8	5864.8	6078.5	6123.1	5676
Q5TZA2	CROCC	Rootletin	Homo sapiens	High	41	1808.6	1961.4	2151.5	1923.4	1816.4	1943	2103.5	1869.9	2012.1	2136.3
H7BZ55	CROCC2	Putative ciliary rootlet coiled-coil protein 2	Homo sapiens	Medium	1	142	163.3	237	165.3	163.5	176.2	206.1	130.5	136.5	219.9
Q9UKG9	CROT	Peroxisomal carnitine O-octanoyltransferase	Homo sapiens	High	16	1172.7	1230.4	1275	1222.1	1275.8	1274.7	1247.8	1190.6	1253.8	1222
O75718	CRTAP	Cartilage-associated protein	Homo sapiens	High	12	1341.5	1363.5	1559	1439.3	1327	1479.2	1561.8	1355.6	1427.2	1465.5
Q6UUV9	CRTC1	CREB-regulated transcription coactivator 1	Homo sapiens	High	4	168.1	219.8	69.5	236.9	156.4	216.6	101.8	286.2	136	85.2
Q53ET0	CRTC2	CREB-regulated transcription coactivator 2	Homo sapiens	High	11	1016.4	984.4	769.1	1012.1	856	967.1	814.6	1083.5	964.5	878.5
Q6UUV7	CRTC3	CREB-regulated transcription coactivator 3	Homo sapiens	High	3	58.7	59.5	94.9	58.7	62	61.7	68.5	62.2	73.8	70.7
Q16526	CRY1	Cryptochrome-1	Homo sapiens	High	7	386.3	390	446.9	409	378.5	451.8	434.1	409.4	402.5	405.2
Q49AN0	CRY2	Cryptochrome-2	Homo sapiens	High	5	125.3	130.8	172.7	148.6	175	148.2	158.5	134	131.7	168.1
Q08257	CRYZ	Quinone oxidoreductase	Homo sapiens	High	20	3488.1	3054.8	3304.7	3166.3	3443.6	3070.6	3307.8	3138.5	3393.4	3435.3
O95825	CRYZL1	Quinone oxidoreductase-like protein 1	Homo sapiens	High	13	1857.7	1803.3	1660.7	1893.9	1836	1967.9	1759.6	1920.9	1873.3	1829.5
O75390	CS	Citrate synthase, mitochondrial	Homo sapiens	High	19	9859.5	11564.7	11910.3	10755.5	10993.9	10229	11601.9	11438.4	9979.4	10683.9
O75534-3	CSDE1	Isoform 3 of Cold shock domain-containing protein E1	Homo sapiens	High	7	35.6	40.3	53.9	35.8	40.4	27.1	46.7	51.1	45.9	56.1
O75534	CSDE1	Cold shock domain-containing protein E1	Homo sapiens	High	51	9839.1	10232.6	9100.4	10330	10065.9	10225.4	9722.5	10579.4	9289.8	9277.5
P55060	CSE1L	Exportin-2	Homo sapiens	High	52	13089.6	13234.8	13417	13264.6	12931.8	13486.5	12865.7	13133.5	12915.6	12945.7
P09603	CSF1	Macrophage colony-stimulating factor 1	Homo sapiens	High	2	51.6	52.4	48.9	54.9	51.2	57.2	55.4	60.5	59.3	48.9
Q8N6G5	CSGALNACT2	Chondroitin sulfate N-acetylgalactosaminyltransferase 2	Homo sapiens	Medium	1	81	67.9	58.3	77.9	62.6	77.8	66.4	43.8	70.5	78.3
P41240	CSK	Tyrosine-protein kinase CSK	Homo sapiens	High	23	6607.2	5778.5	6624.2	5849.6	6443.5	5666	6668.3	6079.6	6597.7	6900.2
P48729	CSNK1A1	Casein kinase I isoform alpha	Homo sapiens	High	13	2172.1	2082	2197.3	2091.3	2270	2065.9	2346.4	2130.8	2176.7	2125.9
P48729-3	CSNK1A1	Isoform 3 of Casein kinase I isoform alpha	Homo sapiens	Medium	3	306.4	312.7	292.7	326.1	311	305.8	289.8	308.6	300.8	256.5
P48730	CSNK1D	Casein kinase I isoform delta	Homo sapiens	High	3	43.8	51.7	44.9	58.4	51.2	48.7	52.6	56.8	50.1	51.3
P48730-2	CSNK1D	Isoform 2 of Casein kinase I isoform delta	Homo sapiens	Medium	2	302.7	391.7	294	360.6	215.5	336.3	313.5	438.8	293.9	310.9
P49674	CSNK1E	Casein kinase I isoform epsilon	Homo sapiens	High	4	2611.6	2779.7	2490.7	2778.2	2209.1	2785.9	2642.6	3023	2548.5	2313.9
Q9HCP0	CSNK1G1	Casein kinase I isoform gamma-1	Homo sapiens	High	4	403.8	373.9	331.8	347.6	395.6	348.4	380.3	352.8	412.4	357.3
P78368	CSNK1G2	Casein kinase I isoform gamma-2	Homo sapiens	High	3	346	340.1	288.2	338.3	286.2	339.9	312.5	349.6	326.5	332
Q9Y6M4	CSNK1G3	Casein kinase I isoform gamma-3	Homo sapiens	High	4	1545.4	1848.5	1570.6	1703.5	1446.2	1634.8	1597.8	1797.9	1475.1	1471.7
P68400	CSNK2A1	Casein kinase II subunit alpha	Homo sapiens	High	20	5520.9	5728.4	5301.1	5738.6	6035.8	6126	5741.9	6035.6	5420.9	5260.3
P19784	CSNK2A2	Casein kinase II subunit alpha'	Homo sapiens	High	20	2418.1	2266.2	2570.1	2308.9	2532.5	2410.6	2606.1	2243.2	2432.8	2444
P67870	CSNK2B	Casein kinase II subunit beta	Homo sapiens	High	8	3474.6	3199.7	3579.7	3435.7	3795.3	3491.6	3614.3	3191.1	3529.4	3631.7
Q1MSJ5	CSPP1	Centrosome and spindle pole-associated protein 1	Homo sapiens	High	10	348.3	361.1	429.8	397.3	356.5	406.1	433.4	371.5	376.2	424.7
P21291	CSRP1	Cysteine and glycine-rich protein 1	Homo sapiens	High	13	1411.1	1477.2	1605.2	1490.5	1464.8	1482.6	1483.2	1549.2	1446.3	1561.8
P01040	CSTA	Cystatin-A	Homo sapiens	High	3	110	130.8	97	128.9	118.3	210.7	173.2	107.9	127	115.4
P04080	CSTB	Cystatin-B	Homo sapiens	High	7	2067.7	2348.4	1931.3	2353.1	2082.4	2048.9	2020	2268.5	2115.2	1939.8
Q05048	CSTF1	Cleavage stimulation factor subunit 1	Homo sapiens	High	15	1806	1678.9	2085.9	1799.1	1803.7	1745.3	2002	1681.7	1819	1913.7
P33240	CSTF2	Cleavage stimulation factor subunit 2	Homo sapiens	High	7	1140.5	1267.9	1414.3	1204.5	1182.7	1265.3	1243.3	1162.6	1083.8	1180.2
Q9H0L4	CSTF2T	Cleavage stimulation factor subunit 2 tau variant	Homo sapiens	High	8	3410	3553.8	3454	3378.2	3701.5	3723.3	3542	3515.9	3389.4	3477.7
Q12996	CSTF3	Cleavage stimulation factor subunit 3	Homo sapiens	High	33	6744.4	7062.5	6561.7	6908.6	6692.3	7455.6	6444.1	6841.8	6449.4	6444.7
Q13363	CTBP1	C-terminal-binding protein 1	Homo sapiens	High	18	2742	2670.1	2653.5	2596.9	2436.7	2567.9	2560.6	2580.5	2514.7	2499.5
Q01459	CTBS	Di-N-acetylchitobiase	Homo sapiens	High	5	354.4	349	382.5	356.8	387.5	313	414.6	358.5	375	401.7
Q2NKJ3	CTC1	CST complex subunit CTC1	Homo sapiens	High	5	217	191	185.7	212.7	221.3	217.9	180.5	200	205.4	213.6
P49711	CTCF	Transcriptional repressor CTCF	Homo sapiens	High	30	6963.7	6607.5	6101.3	6578.2	5641.4	6430.3	6238.2	7075.2	7091.9	6490.3
Q8NI51	CTCFL	Transcriptional repressor CTCFL	Homo sapiens	High	1	55.9	50.5	29.9	49.8	58	53.5	43.4	54.3	51.8	34.3
O95476	CTDNEP1	CTD nuclear envelope phosphatase 1	Homo sapiens	High	2	520.1	519.5	624.7	559.6	577.8	579.8	610.6	524.6	553.7	615.1
Q9Y5B0	CTDP1	RNA polymerase II subunit A C-terminal domain phosphatase	Homo sapiens	High	23	2756.6	2718	2841.2	2677.7	2735.1	2863.4	2651.7	2594.5	2752.2	2889
Q9GZU7	CTDSP1	Carboxy-terminal domain RNA polymerase II polypeptide A small phosphatase 1	Homo sapiens	High	4	378.9	371.8	418.6	397.2	421.6	359.7	428.5	350.5	381.2	406.9
O14595	CTDSP2	Carboxy-terminal domain RNA polymerase II polypeptide A small phosphatase 2	Homo sapiens	High	2	109.4	86.2	118.4	85.5	76.7	89.8	101.9	94.4	109	95.5
Q05D32	CTDSPL2	CTD small phosphatase-like protein 2	Homo sapiens	High	15	2945.4	2502.1	1790.2	2551.4	2831.5	2508	2197	2875.1	2739.3	2165.2
P32929	CTH	Cystathionine gamma-lyase	Homo sapiens	High	7	798.6	724	742.2	737.2	707.6	831.3	774.9	738	794.2	810.7
Q96CG8	CTHRC1	Collagen triple helix repeat-containing protein 1	Homo sapiens	High	4	559.9	509	589.9	529.5	502.5	560.2	565.1	509	587.5	563.6
P35221	CTNNA1	Catenin alpha-1	Homo sapiens	High	36	3964.4	4008.2	4227.6	4153.8	3534.2	4209.2	4292.3	4183.9	4198	4370.8
Q9UBT7	CTNNAL1	Alpha-catulin	Homo sapiens	High	7	440.9	470.2	555.6	462.6	394.2	464	600.2	471.1	461.5	549.9
P35222	CTNNB1	Catenin beta-1	Homo sapiens	High	11	925.7	910.3	823.4	939.2	1531.3	1004	900.8	1045.4	994.9	980.9
Q9NSA3	CTNNBIP1	Beta-catenin-interacting protein 1	Homo sapiens	High	2	111.6	116.3	127.2	113.1	92.9	144	87.4	105.3	97.1	119.6
Q8WYA6	CTNNBL1	Beta-catenin-like protein 1	Homo sapiens	High	26	8136.9	8335.3	7798.3	8386.8	7925.6	8418.6	8031	8682.1	7889.8	7716.5
O60931	CTNS	Cystinosin	Homo sapiens	High	1	83.9	71	51.3	77	84	83.8	57.2	69	90.7	58.2
P17812	CTPS1	CTP synthase 1	Homo sapiens	High	35	7542.4	7134.4	6353.7	7237.5	7437.9	7395.4	6651.2	7639.1	7207.6	6868.9
Q6PD62	CTR9	RNA polymerase-associated protein CTR9 homolog	Homo sapiens	High	47	7927	7779	7885.1	7731.5	7830.5	7854.8	7993	7843	7818.1	7881.7
P10619	CTSA	Lysosomal protective protein	Homo sapiens	High	11	2684.4	2293.5	2319.3	2428.6	2708.6	2310.4	2707.3	2579.1	2578.8	2427.3
P07858	CTSB	Cathepsin B	Homo sapiens	High	8	1022	948.2	995.8	889.1	936.4	987.2	912.8	868.7	803.1	847.1
P53634	CTSC	Dipeptidyl peptidase 1	Homo sapiens	High	13	1444	1479.9	1360	1610.1	1604.1	1614.7	1397.3	1532.5	1408.6	1411.4
P56202	CTSW	Cathepsin W	Homo sapiens	High	7	385.8	354.3	323.8	395	380	357.6	374.5	393.5	383.6	359.1
Q9UBR2	CTSZ	Cathepsin Z	Homo sapiens	High	1	16	14.5	14.7	19.2	10.9	9.8	17.5	15	13.4	14
Q14247	CTTN	Src substrate cortactin	Homo sapiens	High	18	1257.4	1171.3	1431.3	1100.4	1215.2	1143.9	1416.2	1157.2	1297	1427.6
Q7Z7A3	CTU1	Cytoplasmic tRNA 2-thiolation protein 1	Homo sapiens	High	6	183.1	189.5	199.7	184.4	186.8	202.1	181.2	190.7	189	182.4
Q2VPK5	CTU2	Cytoplasmic tRNA 2-thiolation protein 2	Homo sapiens	High	9	889.3	834.8	667.7	876	995.4	875.9	767.1	888.1	877.3	821.4
Q9H467	CUEDC2	CUE domain-containing protein 2	Homo sapiens	High	9	1073.4	1083.4	1090.1	1134.4	1103.1	1173.7	1081.3	1124.8	1057.5	1106
Q13616	CUL1	Cullin-1	Homo sapiens	High	40	6939.5	6884.1	6922.1	6911.1	6967.6	7051.5	7075.2	6949.9	6907.3	6743
Q13617	CUL2	Cullin-2	Homo sapiens	High	40	5611.4	5638.9	5454.9	5618.3	5704	5619.4	5559.9	5744.5	5545.1	5494.3
Q13618	CUL3	Cullin-3	Homo sapiens	High	47	7083.9	7460.1	7351	7407.1	7031.7	7645.7	7335.1	7309.5	6992.2	7295.9
Q13619	CUL4A	Cullin-4A	Homo sapiens	High	30	4087.5	3954	3666.8	3983.9	4164.5	4011.7	4009.3	4120.6	4029.6	3854.1
Q13620	CUL4B	Cullin-4B	Homo sapiens	High	34	8781	7881.1	7577.3	7889.8	8234.5	7799.2	8060.7	8121	8314.1	7848.6
Q93034	CUL5	Cullin-5	Homo sapiens	High	38	5806.3	5785	6669.1	5750.4	5962	5882.2	6405.8	5577.1	5992.3	6272.6
Q8IWT3	CUL9	Cullin-9	Homo sapiens	High	22	937.4	916.5	984	958.2	901	971.8	879.7	876.4	1034.6	948.5
O60888	CUTA	Protein CutA	Homo sapiens	High	6	1557.1	1801.8	1961.3	1675.6	1721	1480	1874.4	1772.1	1759.3	1950
Q9NTM9	CUTC	Copper homeostasis protein cutC homolog	Homo sapiens	High	12	1001	1064.6	1033.2	1060.9	1110	981.2	1069.5	1146.1	985	1019.9
P39880	CUX1	Homeobox protein cut-like 1	Homo sapiens	High	22	4247.2	4443.5	4423.9	4365.7	4529.6	4508.2	4440.3	4320.4	4163.6	4413.7
Q13948	CUX1	Protein CASP	Homo sapiens	High	3	344	262.2	178.9	275.2	326.8	279.8	256.3	297.6	324.3	241.6
Q9P013	CWC15	Spliceosome-associated protein CWC15 homolog	Homo sapiens	High	13	2130.2	2408.1	2452.5	2191.9	2227.9	2036.9	2495.5	2179.1	1980.1	2357.4
Q9HCG8	CWC22	Pre-mRNA-splicing factor CWC22 homolog	Homo sapiens	High	25	5648.8	6157.7	6258.4	6091.8	5839.9	6566.9	5805.6	5717.2	5646.9	5868.1
Q9NXE8	CWC25	Pre-mRNA-splicing factor CWC25 homolog	Homo sapiens	High	12	1403.6	1717.3	1695.5	1687.7	1395.1	1742.9	1456.6	1626.5	1409.4	1562.9
Q6UX04	CWC27	Peptidyl-prolyl cis-trans isomerase CWC27 homolog	Homo sapiens	High	31	3332.9	3354.6	3549.4	3175.8	3328.1	3441.2	3311.7	3269.7	3304.6	3485.7
Q69YN2	CWF19L1	CWF19-like protein 1	Homo sapiens	High	28	3793.2	3721.9	3662.7	3821.5	3730.5	3742.1	3711.7	3760	3746.2	3681.2
Q2TBE0	CWF19L2	CWF19-like protein 2	Homo sapiens	High	32	2755.4	2901.5	3062	2881.5	2890.6	3060.8	2963.8	2799.3	2805.5	2952.7
P78310	CXADR	Coxsackievirus and adenovirus receptor	Homo sapiens	High	10	773.2	738.9	793.8	758.1	811.4	737.1	786.3	760.7	765.4	783.4
P61073	CXCR4	C-X-C chemokine receptor type 4	Homo sapiens	High	3	370	511.1	481.3	495.9	322.4	487.8	403.4	394.1	365.5	377.1
A2AJT9	CXorf23	Uncharacterized protein CXorf23	Homo sapiens	High	8	430.3	420	423.5	413.5	370.4	421.9	454	440.7	435.2	468.7
Q8TB03	CXorf38	Uncharacterized protein CXorf38	Homo sapiens	High	15	1042.4	971.9	932.1	1004.6	952.1	1021.5	1022.6	999.2	999.5	947.6
Q9H5V9	CXorf56	UPF0428 protein CXorf56	Homo sapiens	High	10	878.8	890.3	986.1	889	829.3	923.9	960.3	874.1	886.7	945.6
Q6NSI4	CXorf57	Uncharacterized protein CXorf57	Homo sapiens	High	9	348.1	359.1	350.6	352.4	302.2	381.8	358.3	362	371.7	318.3
Q9P0U4	CXXC1	CXXC-type zinc finger protein 1	Homo sapiens	High	15	1458.9	1284.4	1255.5	1387.3	1393	1417.2	1289.3	1386.7	1460	1325.7
O14569	CYB561D2	Cytochrome b561 domain-containing protein 2	Homo sapiens	High	1	102.4	106.6	144.6	106.2	118.2	113.3	120	100	103	121.5
O43169	CYB5B	Cytochrome b5 type B	Homo sapiens	High	7	1332.5	1419.9	1708.8	1439.7	1492	1594.7	1520.1	1397	1348.6	1554.4
Q9UHQ9	CYB5R1	NADH-cytochrome b5 reductase 1	Homo sapiens	High	12	1106.7	1312.2	971.5	1365	1192.5	1524.2	988.2	1289.5	1087.7	1044.5
P00387	CYB5R3	NADH-cytochrome b5 reductase 3	Homo sapiens	High	16	2007.5	1979.1	2267.5	1884.6	2056	2194.1	2064.3	1866.4	2070.3	1918.9
Q7L1T6	CYB5R4	Cytochrome b5 reductase 4	Homo sapiens	High	13	1231.8	1238.8	1167.4	1302.7	1263.3	1389	1169	1282.6	1277.3	1211.3
P13498	CYBA	Cytochrome b-245 light chain	Homo sapiens	High	3	124.3	242.7	153.6	229.4	119.4	244	152.6	268.6	131.9	130.4
Q53TN4	CYBRD1	Cytochrome b reductase 1	Homo sapiens	High	3	248.1	309.1	334.4	304.2	271.3	305.9	286.7	283.9	259.8	295.1
P08574	CYC1	Cytochrome c1, heme protein, mitochondrial	Homo sapiens	High	13	3004.3	3168.8	2849.3	3220.8	3013.1	3440.4	2794.4	3292.4	2819.6	2570.7
Q7L576	CYFIP1	Cytoplasmic FMR1-interacting protein 1	Homo sapiens	High	1	400.2	380	326.6	362	329.1	400.6	299.6	368.3	358.6	360.1
Q96F07	CYFIP2	Cytoplasmic FMR1-interacting protein 2	Homo sapiens	High	35	13820.6	13284.8	13226.9	13441.2	12780.4	13819.9	13642.1	13521.8	13888.8	13250.5
E9PJD7	CYHR1	Cysteine and histidine-rich protein 1	Homo sapiens	High	2	44.9	51.1	44.8	44	40.9	54.7	49.9	44.2	38.3	48.8
Q6ZMK1	CYHR1	Cysteine and histidine-rich protein 1	Homo sapiens	High	5	733	429.7	531.2	504.2	696.8	592.9	537.8	472.3	828.1	677.4
Q6UW02	CYP20A1	Cytochrome P450 20A1	Homo sapiens	High	17	1270.3	1303.7	1451.2	1278.7	1333.8	1262.1	1368.7	1192	1295.2	1396
Q7Z449	CYP2U1	Cytochrome P450 2U1	Homo sapiens	High	4	254.3	246.9	252.6	263.1	237.2	250.1	251.1	255.3	263	238.1
Q6ZWL3	CYP4V2	Cytochrome P450 4V2	Homo sapiens	High	5	233.2	237.2	263.7	239.7	251.2	241	253.5	233.8	272.1	271.3
Q16850	CYP51A1	Lanosterol 14-alpha demethylase	Homo sapiens	High	23	4279.5	4834.7	4130.2	4716.4	4311.2	5266.1	4634.1	5279.1	4550.6	4240.6
Q15438	CYTH1	Cytohesin-1	Homo sapiens	High	9	981.4	892.8	829.8	943	855.6	900.2	912.8	1008.1	975.6	909.7
Q99418	CYTH2	Cytohesin-2	Homo sapiens	High	2	84.7	85.3	105.9	93	78.3	85.1	105.1	95.6	101.9	109.6
Q9UIA0	CYTH4	Cytohesin-4	Homo sapiens	High	1	82.6	115.9	88.2	108.4	90	90.1	90.7	100.2	71.5	75.5
Q8N465	D2HGDH	D-2-hydroxyglutarate dehydrogenase, mitochondrial	Homo sapiens	High	10	666.5	700.2	771.1	670.6	687.9	696.3	712.4	689.3	708	752.4
Q9Y4D1	DAAM1	Disheveled-associated activator of morphogenesis 1	Homo sapiens	High	6	421.4	527.7	428.3	465.6	414.1	498.8	432.9	473.9	418.6	468.4
P98082	DAB2	Disabled homolog 2	Homo sapiens	High	6	611.8	652.6	722.4	655	572.8	719.6	705.8	662.9	682.7	723.9
Q9UI36	DACH1	Dachshund homolog 1	Homo sapiens	High	9	1152.5	1079.1	1255.8	1125.8	1200.2	1211.2	1105.7	1023.4	1201.5	1274.2
P61803	DAD1	Dolichyl-diphosphooligosaccharide--protein glycosyltransferase subunit DAD1	Homo sapiens	High	3	210.4	256.6	247.6	243.5	232.6	228.8	235.3	234.8	218.5	219.3
Q14118	DAG1	Dystroglycan	Homo sapiens	High	15	1196.6	1138.2	1255.2	1166.3	1224	1145.3	1226.1	1198.8	1149.9	1224.7
Q8NCG7	DAGLB	Sn1-specific diacylglycerol lipase beta	Homo sapiens	High	11	971.5	878.2	970.9	912.3	987.2	967.1	979.7	880.9	975.2	1010.6
Q5D0E6	DALRD3	DALR anticodon-binding domain-containing protein 3	Homo sapiens	High	5	354.9	360.9	406.5	347.6	356.6	376	379	351.5	353.1	356.3
P51397	DAP	Death-associated protein 1	Homo sapiens	High	4	452.2	407.9	225.7	384.9	384.4	332.6	315.7	435	381.3	278.8
P51398	DAP3	28S ribosomal protein S29, mitochondrial	Homo sapiens	High	23	3752.6	3869.7	2900.2	3946.7	3942.5	3908.4	3448.1	4196.3	3597.7	3197.7
P53355	DAPK1	Death-associated protein kinase 1	Homo sapiens	High	24	2093.9	2212	2237.2	2245.7	2210.3	2499.5	2389.8	2277.7	2198.8	2311.9
O43293	DAPK3	Death-associated protein kinase 3	Homo sapiens	High	10	884.7	917.8	880.8	928.1	921.1	997.4	952.2	908	938.6	989.7
P14868	DARS	Aspartate--tRNA ligase, cytoplasmic	Homo sapiens	High	35	9913.1	9515	9300.9	9223.2	9651.9	9079.1	9695.7	9773.8	9671.3	9248.9
Q6PI48	DARS2	Aspartate--tRNA ligase, mitochondrial	Homo sapiens	High	28	3940	3668.6	3886.8	3655	4003.4	3773.6	3930.6	3521.3	3754.5	3794.4
Q9UER7	DAXX	Death domain-associated protein 6	Homo sapiens	High	12	1673.7	1767	2046.5	1724.5	1600.3	1813.5	1796.4	1625.6	1671.2	1915.6
Q96EP5	DAZAP1	DAZ-associated protein 1	Homo sapiens	High	13	3044	2672.3	2447	2776.9	3001.8	2759.3	2675.1	3059.7	2953.8	2643.8
Q15038	DAZAP2	DAZ-associated protein 2	Homo sapiens	High	1	146.7	141	170.4	126.3	107.1	132.1	140.7	134.5	145.1	175
Q9UBU7	DBF4	Protein DBF4 homolog A	Homo sapiens	High	12	934.5	896.2	1034.5	938.7	1230.3	986.1	982.6	957	1019.3	1051
P07108	DBI	Acyl-CoA-binding protein	Homo sapiens	High	8	2749.9	2490.3	2204.1	2579.5	2969.8	2262.9	2494.5	2703.6	2916.5	2661.9
Q16643	DBN1	Drebrin	Homo sapiens	High	32	3181.8	4224.7	3707.6	3878.4	3239.4	3994	3383.6	4158.4	3038.5	3099.9
D6R9W4	DBN1	Drebrin (Fragment)	Homo sapiens	High	7	1432.8	1356.7	1486.9	1292.8	1504.6	1179.6	1378.2	1295.6	1430.3	1576.4
Q9UJU6	DBNL	Drebrin-like protein	Homo sapiens	High	19	3433.3	3562.5	3467.4	3569.2	3138.7	3691.8	3406.1	3579.3	3259.6	3492
Q9UK59	DBR1	Lariat debranching enzyme	Homo sapiens	High	22	3061.1	2909.4	3192.1	2976.5	3011.3	2964.2	3111.9	2901.9	3103.5	3114.8
P11182	DBT	Lipoamide acyltransferase component of branched-chain alpha-keto acid dehydrogenase complex, mitochondrial	Homo sapiens	High	13	2634.2	2584.8	2485.7	2552.7	2841.1	2626.7	2691.3	2613.3	2572.1	2662.1
Q5QP82	DCAF10	DDB1- and CUL4-associated factor 10	Homo sapiens	High	9	306.9	297.4	398.9	308.5	285	319.4	406.9	297.5	320.8	374.1
Q8TEB1	DCAF11	DDB1- and CUL4-associated factor 11	Homo sapiens	High	15	1283.3	1328.5	1371.8	1329.9	1361.9	1404.7	1345	1294	1297.1	1390.2
Q5T6F0	DCAF12	DDB1- and CUL4-associated factor 12	Homo sapiens	High	11	1073.6	991.8	1051.8	1072.9	958.8	1193.2	1049	1077	1173.9	1170.7
Q9NV06	DCAF13	DDB1- and CUL4-associated factor 13	Homo sapiens	High	24	4493.1	4048	4565.3	4223.1	3505.1	4153.1	4379.5	4155.6	4658.8	4437.5
Q66K64	DCAF15	DDB1- and CUL4-associated factor 15	Homo sapiens	High	9	542.7	513.7	567.2	531.1	542.2	539	549.6	533.5	541.7	609.4
Q9NXF7	DCAF16	DDB1- and CUL4-associated factor 16	Homo sapiens	High	7	628.2	582.9	552.9	592.9	547.5	598.7	555.6	622	628.6	579.7
Q5H9S7	DCAF17	DDB1- and CUL4-associated factor 17	Homo sapiens	High	3	208.9	190.9	172.5	190.4	192.7	187.8	184	222.3	209.6	189.8
Q8WV16	DCAF4	DDB1- and CUL4-associated factor 4	Homo sapiens	High	2	65.9	72.4	60.9	72.5	71.1	89.7	64.7	59.4	74.5	67.2
Q96JK2	DCAF5	DDB1- and CUL4-associated factor 5	Homo sapiens	High	17	1303.9	1174.8	1038	1211.1	1245.8	1216.9	1118.8	1270.6	1349.2	1193.9
Q58WW2	DCAF6	DDB1- and CUL4-associated factor 6	Homo sapiens	High	11	1076.7	1047.9	877.3	1021.9	1051.1	1034.5	947.3	1067.6	1055.3	1077.9
P61962	DCAF7	DDB1- and CUL4-associated factor 7	Homo sapiens	High	14	1927.9	1886.2	1788	1944.3	1783.4	1905.7	1871.4	1856.2	1881.2	1844.6
Q5TAQ9	DCAF8	DDB1- and CUL4-associated factor 8	Homo sapiens	High	14	1024.9	912.5	912.6	907.2	984.9	921.7	1063.5	972.2	1030.1	1022
Q8WVC6	DCAKD	Dephospho-CoA kinase domain-containing protein	Homo sapiens	High	4	320.6	250.9	364.2	277.6	348.8	295	323.4	246.5	364.8	368.6
P81605	DCD	Dermcidin	Homo sapiens	High	8	1817.5	1977	254.8	2089.1	297.6	4091.1	501.5	280.3	537.7	665.6
P27707	DCK	Deoxycytidine kinase	Homo sapiens	High	14	1660.9	1627.5	1625.2	1581.8	1495.5	1505.4	1575	1586.3	1602.7	1555.3
Q6PJP8	DCLRE1A	DNA cross-link repair 1A protein	Homo sapiens	High	6	252	303.5	325.1	282	229.5	334.8	271	266.9	258	306.8
Q9H816	DCLRE1B	5' exonuclease Apollo	Homo sapiens	High	5	390	336.4	221.2	341.7	303	313.2	291.7	400.9	377.6	301.8
Q96SD1	DCLRE1C	Protein artemis	Homo sapiens	High	3	147.2	168.8	199.1	137.2	137.9	173.9	171.5	138.1	150.8	190.7
Q9NPI6	DCP1A	mRNA-decapping enzyme 1A	Homo sapiens	High	20	3095.7	3107.2	3233.2	3130.9	3107	3181.4	3236.3	3129.4	3092.6	3195.4
Q8IZD4	DCP1B	mRNA-decapping enzyme 1B	Homo sapiens	High	18	1188.3	1031.3	1222.2	1069.3	1152.8	1059.7	1144	1095.4	1145.6	1200.2
Q8IU60	DCP2	m7GpppN-mRNA hydrolase	Homo sapiens	High	13	2064.4	1881	2036.1	1865.3	1967.3	1877.9	2061.7	1788.4	2141.9	2155.9
Q96C86	DCPS	m7GpppX diphosphatase	Homo sapiens	High	18	3650.7	3354.5	4003.6	3185.2	3592	3237.8	3496.2	3122.3	3541.1	3804.9
P32321	DCTD	Deoxycytidylate deaminase	Homo sapiens	High	9	1275.3	1002.1	969.2	1056.6	1257.7	1009.3	1118.6	1111.5	1262.8	1206.5
E7EX90	DCTN1	Dynactin subunit 1	Homo sapiens	High	15	19.2	21.9	12.9	23.4	18.5	20.6	19.2	23.9	20.8	20.9
Q14203	DCTN1	Dynactin subunit 1	Homo sapiens	High	63	9824.4	9773.6	10113.6	9509.6	9509.5	9506.5	9718.2	9538.9	9698.7	10244.1
Q13561	DCTN2	Dynactin subunit 2	Homo sapiens	High	21	4173.3	3894.7	3660	3981	3957.3	3850	4120.5	4099.8	3805.4	3713.4
O75935	DCTN3	Dynactin subunit 3	Homo sapiens	High	10	2263.6	2124.3	2494.6	2205.6	2200.6	2176.7	2281.5	2117.9	2300.3	2360.1
Q9UJW0	DCTN4	Dynactin subunit 4	Homo sapiens	High	21	2073	2115.6	1994.6	2146.3	2093.5	2083	2043.1	2145.1	1948.6	2045.8
Q9BTE1	DCTN5	Dynactin subunit 5	Homo sapiens	High	2	113.1	114.4	126.2	102.3	114.3	107.3	120.3	106.3	105	117.5
O00399	DCTN6	Dynactin subunit 6	Homo sapiens	High	5	1550.6	1670.6	1505.1	1556.1	1551.3	1747.8	1418.5	1519.8	1549.9	1608.1
Q9H773	DCTPP1	dCTP pyrophosphatase 1	Homo sapiens	High	13	1229.9	1189.4	1229.8	1153.9	1296.1	1223.6	1212.3	1168.8	1195.9	1190.2
Q96GG9	DCUN1D1	DCN1-like protein 1	Homo sapiens	High	13	3311.1	3026.7	2452.7	3117.1	3275.1	3003.9	2826	3337.5	3210.7	2900.3
Q8IWE4	DCUN1D3	DCN1-like protein 3	Homo sapiens	High	5	209.6	194.6	219.5	199.2	214.7	194.4	222.8	187.9	192.5	214.4
Q92564	DCUN1D4	DCN1-like protein 4	Homo sapiens	High	5	184.6	180.3	242.3	213.3	185.7	209	199	159.2	205.3	225.1
Q9BTE7	DCUN1D5	DCN1-like protein 5	Homo sapiens	High	8	1141	1128.5	1283	1151.1	1218.9	1146.1	1354.6	1111.2	1136.3	1294.5
Q7Z4W1	DCXR	L-xylulose reductase	Homo sapiens	High	9	1953.4	1799.7	1663.6	1798.1	2206.5	1753.4	1898.4	2074.7	1964.1	1816.2
Q9BW61	DDA1	DET1- and DDB1-associated protein 1	Homo sapiens	High	9	1204.5	1128.5	986.4	1134.5	1104.7	1124.3	998.8	1143.6	1277.5	1055.2
O95865	DDAH2	N(G),N(G)-dimethylarginine dimethylaminohydrolase 2	Homo sapiens	High	10	1393.5	1633	1655.3	1593.4	1319.5	1623.5	1500.1	1540.9	1392.9	1465.8
Q16531	DDB1	DNA damage-binding protein 1	Homo sapiens	High	58	14506.4	14945.4	14433.7	15294.3	13996.6	15558	13974.4	15015.1	14055.6	13818.5
Q92466	DDB2	DNA damage-binding protein 2	Homo sapiens	High	14	1945.9	1974.3	1612.8	1914.1	1676	2048.7	1700.7	2070.4	1794.2	1664.9
Q8NEL9	DDHD1	Phospholipase DDHD1	Homo sapiens	High	16	1551.7	1620.3	1613.3	1641.7	1618.5	1566.1	1708.8	1566.3	1547.2	1543.4
O94830	DDHD2	Phospholipase DDHD2	Homo sapiens	High	13	737.3	714	635.9	665.1	572.1	715.8	690	698.7	703.7	700.6
Q5TDH0	DDI2	Protein DDI1 homolog 2	Homo sapiens	High	17	2734	2275.2	1974.7	2468.7	2860	2297.2	2274.6	2605.3	2599.9	2323.9
P39656	DDOST	Dolichyl-diphosphooligosaccharide--protein glycosyltransferase 48 kDa subunit	Homo sapiens	High	17	2097.5	2085.7	1940.9	2093.6	2200.5	2126.4	1992.7	2201	2090.6	1991.5
Q96HY6	DDRGK1	DDRGK domain-containing protein 1	Homo sapiens	High	13	1182.7	1159.6	1425.1	1136	1203.3	1114.6	1221	1094.5	1177.5	1228.2
P30046	DDT	D-dopachrome decarboxylase	Homo sapiens	High	6	908.4	950.9	1030.1	1111.4	941.9	992	894.8	1010.4	992.6	929.6
Q92499	DDX1	ATP-dependent RNA helicase DDX1	Homo sapiens	High	46	7921.3	7530.6	8075.3	7662.3	7895.6	7806.9	8418.3	7865.9	8078	8330.1
Q13206	DDX10	Probable ATP-dependent RNA helicase DDX10	Homo sapiens	High	37	5763.5	5344.7	5394.2	5487.3	3842.8	5324.5	5539.2	5387.3	5746.5	5531.7
Q96FC9	DDX11	ATP-dependent DNA helicase DDX11	Homo sapiens	High	5	1838	1709.6	1488.8	1637	1725.3	1636.9	1718.4	1752	1810.9	1494.3
A8MPP1	DDX11L8	Putative ATP-dependent RNA helicase DDX11-like protein 8	Homo sapiens	High	5	783.9	738.9	575.8	734.5	721.3	811	662.3	825.7	755	671.8
Q92841	DDX17	Probable ATP-dependent RNA helicase DDX17	Homo sapiens	High	37	14522.9	15088.6	15485.2	14832.9	15910.6	15052.4	14698.8	14841.9	14585.4	14466.7
Q9NVP1	DDX18	ATP-dependent RNA helicase DDX18	Homo sapiens	High	32	8696.7	8892.9	8315.8	8691.3	8129.5	8879.3	8680	8995.4	8487.3	8400.8
Q9NUU7	DDX19A	ATP-dependent RNA helicase DDX19A	Homo sapiens	High	4	6183.9	6517.7	6895.9	6401.1	6208.9	6356.8	6731.1	6085.6	5973.1	6239
Q9UMR2	DDX19B	ATP-dependent RNA helicase DDX19B	Homo sapiens	High	2	70.4	86.5	95.9	79.2	78.6	86.5	109.6	76.1	86.1	90.6
Q9UHI6	DDX20	Probable ATP-dependent RNA helicase DDX20	Homo sapiens	High	33	4952.9	5220.2	5146.2	5305.9	4896.1	5197.2	5120.5	5069.9	4786.2	5076.5
Q9NR30	DDX21	Nucleolar RNA helicase 2	Homo sapiens	High	58	13743.1	14551.4	14822.1	13920.7	14301.9	13941.9	13973.7	14336.9	14538.8	14166.4
Q9BUQ8	DDX23	Probable ATP-dependent RNA helicase DDX23	Homo sapiens	High	42	7367.7	7287	7609.9	7111.9	7213.7	6911.1	7811.1	7262.5	7186.7	7354.9
Q9GZR7	DDX24	ATP-dependent RNA helicase DDX24	Homo sapiens	High	38	5841.3	6039.2	5663.1	6121.5	4297.5	5955.4	5860.5	5916.2	5497.4	5635.7
Q96GQ7	DDX27	Probable ATP-dependent RNA helicase DDX27	Homo sapiens	High	36	5267.6	5254.7	5593.4	5315.5	4476.8	5446.8	5597	5446.6	5398.2	5646.8
Q9NUL7	DDX28	Probable ATP-dependent RNA helicase DDX28	Homo sapiens	High	16	1581	1475.4	1284.4	1586.6	1682.4	1560.9	1451	1725	1540.2	1409.7
Q9H8H2	DDX31	Probable ATP-dependent RNA helicase DDX31	Homo sapiens	High	29	2733.3	2698	2744.1	2779.6	2569.1	2839	2904.4	2804.4	2913.1	2906.3
O00148	DDX39A	ATP-dependent RNA helicase DDX39A	Homo sapiens	High	10	3256.2	3683.8	3197.9	3609	3391.2	3897.5	3213.8	3590.3	3176.7	3224.3
Q13838	DDX39B	Spliceosome RNA helicase DDX39B	Homo sapiens	High	11	6499.6	6254.3	6566.2	6149	6276.7	6206.7	6470.5	6065.7	6234	6384.5
O00571	DDX3X	ATP-dependent RNA helicase DDX3X	Homo sapiens	High	39	11394.8	11641.7	12405	11948.8	11681.7	11550.4	11723.2	11611.8	11311.4	11500.4
Q9UJV9	DDX41	Probable ATP-dependent RNA helicase DDX41	Homo sapiens	High	31	4809.9	4806.8	4804.8	4843.8	4705.2	5097.1	4894.2	4864	4982	4957.1
Q86XP3	DDX42	ATP-dependent RNA helicase DDX42	Homo sapiens	High	39	6161.4	6048.4	6218.2	6061.4	6040.7	6240.7	6060.7	6007.4	6056.8	6066.2
A0A0C4DG89	DDX46	Probable ATP-dependent RNA helicase DDX46	Homo sapiens	High	14	2050.7	2195.3	2458.8	2175.8	2013.7	2242	2195.6	2114.6	2099.3	2252.9
Q7L014	DDX46	Probable ATP-dependent RNA helicase DDX46	Homo sapiens	High	65	13855.1	13813.2	14302.6	13598.8	13003.8	13870	13559.1	13205.2	13683	13774.5
Q9H0S4	DDX47	Probable ATP-dependent RNA helicase DDX47	Homo sapiens	High	22	5526	5137.8	5282.4	5202.6	5278.1	5386.9	5489.8	5219.9	5312.3	5028.2
Q9Y6V7	DDX49	Probable ATP-dependent RNA helicase DDX49	Homo sapiens	High	22	4504.2	4353.7	4084.9	4484.2	3517.5	4413.7	4411.4	4413	4603.6	4471
P17844	DDX5	Probable ATP-dependent RNA helicase DDX5	Homo sapiens	High	37	10053.2	10199.5	10529.7	10355.9	11421.6	10270.4	10425	10516.7	10241.8	9843.8
Q9BQ39	DDX50	ATP-dependent RNA helicase DDX50	Homo sapiens	High	34	4169.8	4299.8	4706	4402.6	3761.7	4339	4422.2	4055.5	4307.5	4415.3
Q8N8A6	DDX51	ATP-dependent RNA helicase DDX51	Homo sapiens	High	26	1785	1745.2	1591.1	1793.1	1751.8	1902.2	1554.8	1820.2	1755.5	1654.2
Q9Y2R4	DDX52	Probable ATP-dependent RNA helicase DDX52	Homo sapiens	High	28	3080.2	3126.5	2411	3200.1	2108.4	3294.6	2581.1	3317.7	3069	2598.7
Q8TDD1	DDX54	ATP-dependent RNA helicase DDX54	Homo sapiens	High	35	3414.1	3466.3	3700	3624.8	3171.3	3795.3	3689.7	3575.4	3558.2	3762.3
Q8NHQ9	DDX55	ATP-dependent RNA helicase DDX55	Homo sapiens	High	20	1745.8	1889.1	1793.8	1920.4	1670.4	2116.3	1753.3	1904.4	1788.1	1765.5
Q9NY93	DDX56	Probable ATP-dependent RNA helicase DDX56	Homo sapiens	High	18	2298.7	2245.6	2223.8	2341.4	2129.7	2612.3	2236.8	2429.5	2418.6	2356.9
O95786	DDX58	Probable ATP-dependent RNA helicase DDX58	Homo sapiens	High	37	4707.1	4628.7	4796.4	4588.8	4100.5	4638.3	4856.5	4555.1	4558.9	4611.1
Q5T1V6	DDX59	Probable ATP-dependent RNA helicase DDX59	Homo sapiens	High	15	569.9	565.1	687.3	551.6	543.3	524.8	596.1	558.3	596.1	637.2
P26196	DDX6	Probable ATP-dependent RNA helicase DDX6	Homo sapiens	High	22	5186.9	4784.9	4635.8	4823.3	5472.7	4994.1	5141.8	5176.3	5082.4	4899.6
Q8IY21	DDX60	Probable ATP-dependent RNA helicase DDX60	Homo sapiens	High	49	5115.3	5171	5266.7	5012.8	4667.8	5101.3	5171.9	5128.4	5149.5	5162.7
Q5H9U9	DDX60L	Probable ATP-dependent RNA helicase DDX60-like	Homo sapiens	High	13	792.9	879.2	845.9	919.8	797.8	875	787.3	778.5	803.2	810.3
O75398	DEAF1	Deformed epidermal autoregulatory factor 1 homolog	Homo sapiens	High	8	134.6	133.8	163	132	124.6	124.2	152.5	133.6	126.8	162.8
Q16698	DECR1	2,4-dienoyl-CoA reductase, mitochondrial	Homo sapiens	High	18	5152.6	4712.8	4666.6	4858.7	5196.1	4498.7	4896.2	5087.2	4911.5	4711
Q9NUI1	DECR2	Peroxisomal 2,4-dienoyl-CoA reductase	Homo sapiens	High	5	564.3	556.4	525.4	553.3	552.6	616.3	547.6	609.3	569.5	542.5
Q9H4E7	DEF6	Differentially expressed in FDCP 6 homolog	Homo sapiens	High	26	4171.7	4129.2	4482.8	4113.1	3931.9	4195.6	4082.8	3789.7	4095.5	4239.3
Q6ZN54	DEF8	Differentially expressed in FDCP 8 homolog	Homo sapiens	High	2	48.6	54.5	57.8	55.7	54.9	57	49.5	57.4	58.1	56.2
O15121	DEGS1	Sphingolipid delta(4)-desaturase DES1	Homo sapiens	High	4	631.1	697	607.1	688.7	598.4	763	626.4	741.5	608.1	634.5
P35659	DEK	Protein DEK	Homo sapiens	High	31	5942.4	5826.2	5825.3	5772.3	5440.7	5625.4	5798.6	5900.8	5848.6	5711.9
Q8TEH3	DENND1A	DENN domain-containing protein 1A	Homo sapiens	High	13	438.6	448.4	505.2	469	422.6	485.9	469.3	446.4	453.7	448.2
Q6P3S1	DENND1B	DENN domain-containing protein 1B	Homo sapiens	High	7	208.4	192.8	201.8	191	228.4	237.7	187.4	213.5	209.7	217.6
Q8IV53	DENND1C	DENN domain-containing protein 1C	Homo sapiens	High	13	1381.9	1291.8	1018.3	1336.1	1349.5	1281.7	1122.8	1338.5	1283.1	1278.3
A2RUS2	DENND3	DENN domain-containing protein 3	Homo sapiens	High	3	72.1	57.4	63.5	63.4	48.5	55.8	74.6	73.7	63.8	72.3
Q7Z401	DENND4A	C-myc promoter-binding protein	Homo sapiens	High	14	700.3	718.5	720.7	694.3	681.2	740.4	739.9	705.1	740.6	713.9
O75064	DENND4B	DENN domain-containing protein 4B	Homo sapiens	High	6	336.2	300.4	364.7	329.5	332.7	313.2	356.8	313.2	354.4	363.5
R4GN35	DENND4C	DENN domain-containing protein 4C	Homo sapiens	High	14	206.8	204	279.6	194	198.9	204.3	250.1	193.4	189.8	240.7
Q5VZ89	DENND4C	DENN domain-containing protein 4C	Homo sapiens	High	32	1919.1	2021.3	1909	1990.4	1823.8	2093.2	1903	1907.1	1927.8	1997.1
Q6ZUT9	DENND5B	DENN domain-containing protein 5B	Homo sapiens	Medium	3	138.3	113.3	105.5	120.7	128.4	133.1	109.6	109.7	157.7	111.5
Q8IWF6	DENND6A	Protein DENND6A	Homo sapiens	High	13	857.3	824.8	795.6	853.5	823.3	923.7	795.9	817.1	813.4	819.1
O43583	DENR	Density-regulated protein	Homo sapiens	High	10	1999.4	2026.3	2400.5	1864.8	1827	1730.1	2264.5	1734.8	1906.7	2215.1
Q5TB30	DEPDC1	DEP domain-containing protein 1A	Homo sapiens	High	4	297.3	331.8	320.4	306	353.8	376.2	304.6	322.2	305.1	332.7
Q8WUY9	DEPDC1B	DEP domain-containing protein 1B	Homo sapiens	High	13	1036	997.4	860.6	1041.9	1086	1268.8	950.3	1037.8	1029.3	955.4
O75140	DEPDC5	DEP domain-containing protein 5	Homo sapiens	High	15	722.7	706.1	674.5	730.7	682	740.3	682.6	721.8	702.2	677.2
Q96QD5	DEPDC7	DEP domain-containing protein 7	Homo sapiens	High	4	185.5	202.3	253.9	195.9	222.1	232.8	232.9	199.8	218.6	225.8
Q9Y315	DERA	Deoxyribose-phosphate aldolase	Homo sapiens	High	18	2186.4	2126.6	1895.7	2160.5	2039.5	2197	2015.1	2233.5	2041.4	1870.5
Q9BUN8	DERL1	Derlin-1	Homo sapiens	High	1	21.6	15.5	14.9	13.1	16.7	14.4	14	15.9	18.8	18.3
Q9GZP9	DERL2	Derlin-2	Homo sapiens	High	1	13.7	17.2	22.8	14.4	15.3	19.3	18.2	19.2	14.1	12.7
Q6ICB0	DESI1	Desumoylating isopeptidase 1	Homo sapiens	High	4	340.1	372	265.9	410.1	431.6	439.5	314.5	409.5	382.3	333.6
Q9BSY9	DESI2	Desumoylating isopeptidase 2	Homo sapiens	High	5	386.5	412.4	377.3	408.8	443.8	451.3	384.4	434	416.8	436.6
O00273-2	DFFA	Isoform DFF35 of DNA fragmentation factor subunit alpha	Homo sapiens	High	3	381.6	570.4	462.7	532.3	385.6	548.6	451.6	538.6	338.2	402.4
O00273	DFFA	DNA fragmentation factor subunit alpha	Homo sapiens	High	16	2330.9	2033.5	2466.7	2011.4	2270.3	2012.4	2393.3	2038.5	2316	2358.7
O76075	DFFB	DNA fragmentation factor subunit beta	Homo sapiens	High	3	231.5	209.2	177.4	210.4	239.1	233.7	192	243.2	230.6	193.1
O75907	DGAT1	Diacylglycerol O-acyltransferase 1	Homo sapiens	High	4	195.5	215.3	260.4	201	210.6	216.3	228.5	183.8	229.5	235.1
Q96DF8	DGCR14	Protein DGCR14	Homo sapiens	High	18	1908.1	1835.7	2130.5	1905.3	2041.8	1989.9	1971.8	1804.6	1981.5	2080.9
Q9BY27	DGCR6L	Protein DGCR6L	Homo sapiens	High	4	318.4	287.6	272.2	258.9	312.4	272.6	295	296.6	302.2	321.1
Q8WYQ5	DGCR8	Microprocessor complex subunit DGCR8	Homo sapiens	High	15	1474.3	1343.3	1496.8	1362.1	1532.8	1457.6	1524.8	1311.4	1551.6	1524.3
P23743	DGKA	Diacylglycerol kinase alpha	Homo sapiens	High	28	4301	4375	4589.7	4329.3	4348.2	4561.5	4177.2	4201.9	4244.4	4369.2
P52429	DGKE	Diacylglycerol kinase epsilon	Homo sapiens	High	12	1650.4	1783.9	1815.9	1802.2	1801.2	1924.8	1667.1	1656.8	1658.4	1746.5
Q86XP1	DGKH	Diacylglycerol kinase eta	Homo sapiens	High	18	1504.2	1538.8	1672.4	1533.4	1431.4	1510.8	1623.1	1464.4	1519.2	1732.4
O75912	DGKI	Diacylglycerol kinase iota	Homo sapiens	High	1	23.5	28.6	24.5	21.9	32.1	25.1	25.2	25.5	27.2	28.4
Q13574	DGKZ	Diacylglycerol kinase zeta	Homo sapiens	High	25	2370.4	2273.9	2309.3	2261.3	2049.9	2122.4	2371.3	2321.1	2355.7	2341.9
Q16854	DGUOK	Deoxyguanosine kinase, mitochondrial	Homo sapiens	High	9	1228.9	1269.5	1033.4	1285.4	1292.9	1408.9	1118.9	1359.1	1271	1141.6
Q15392	DHCR24	Delta(24)-sterol reductase	Homo sapiens	High	14	1887.4	1995.3	1911.6	2209.3	2421.4	2397.7	2076.6	2180.5	2223.3	2083.8
Q9UBM7	DHCR7	7-dehydrocholesterol reductase	Homo sapiens	High	5	689.4	787.4	712.1	803.9	747.4	809.5	739.2	835.2	699.2	770.4
Q86SQ9	DHDDS	Dehydrodolichyl diphosphate synthase complex subunit DHDDS	Homo sapiens	High	4	118.2	102.6	91.3	121.5	134.1	110.5	90.9	117.2	115.8	101
P00374	DHFR	Dihydrofolate reductase	Homo sapiens	High	15	3249.2	3177.6	3393.7	3201.2	4016.6	3405.2	3867.1	3580.2	3453.3	3496.6
Q02127	DHODH	Dihydroorotate dehydrogenase (quinone), mitochondrial	Homo sapiens	High	17	2319.1	2796.8	2761.1	2616.4	2496.1	2796.5	2526.4	2521.6	2311.7	2352.2
P49366	DHPS	Deoxyhypusine synthase	Homo sapiens	High	20	3178.1	2883	3131.3	2961.6	3177.3	2912.1	3061.2	2975.6	3099.7	3251.2
Q96LJ7	DHRS1	Dehydrogenase/reductase SDR family member 1	Homo sapiens	High	8	383.9	394.2	372.9	409.2	407.5	442.6	402.6	468.7	420.3	419.5
Q6UWP2	DHRS11	Dehydrogenase/reductase SDR family member 11	Homo sapiens	High	9	707.3	740.4	746.9	758.7	616.6	801.4	713.1	651.1	682.1	730.2
Q13268	DHRS2	Dehydrogenase/reductase SDR family member 2, mitochondrial	Homo sapiens	High	24	8870.9	8689.3	6586.9	9584.2	9518.5	8178	7245.4	8839.5	10135.4	7717.4
O75911	DHRS3	Short-chain dehydrogenase/reductase 3	Homo sapiens	Medium	1	74	65.7	51.8	65.6	82	63.5	63.2	80.4	74.1	71.7
Q9BTZ2	DHRS4	Dehydrogenase/reductase SDR family member 4	Homo sapiens	High	11	2022.8	1965.6	1913.9	1888.7	2062.5	1905.4	2032.1	2050.6	1975	1862.2
Q9Y394	DHRS7	Dehydrogenase/reductase SDR family member 7	Homo sapiens	High	14	1398.7	1356.2	1486.3	1393.8	1474.4	1494.3	1428.7	1420.1	1431.4	1442.6
Q6IAN0	DHRS7B	Dehydrogenase/reductase SDR family member 7B	Homo sapiens	High	11	473.1	514.2	572.6	533.5	594.5	542.3	592.4	477.8	536.3	557.3
Q8N5I4	DHRSX	Dehydrogenase/reductase SDR family member on chromosome X	Homo sapiens	High	4	127.7	130.1	126.7	141.3	146.4	126	147.8	149.4	144.4	153.1
Q96HY7	DHTKD1	Probable 2-oxoglutarate dehydrogenase E1 component DHKTD1, mitochondrial	Homo sapiens	High	13	1316.2	1194.9	920.1	1205.7	1113.8	1247.7	967.5	1266.8	1248.2	988.9
O43143	DHX15	Pre-mRNA-splicing factor ATP-dependent RNA helicase DHX15	Homo sapiens	High	46	15201.9	15891.6	15312.5	15982.9	15833.2	16477.4	15316.9	16182.9	14752.4	14850.8
O60231	DHX16	Putative pre-mRNA-splicing factor ATP-dependent RNA helicase DHX16	Homo sapiens	High	39	4117.6	4288.3	4689	4216.3	4578.8	4453.3	4414	4143.9	4147.4	4287.6
Q7Z478	DHX29	ATP-dependent RNA helicase DHX29	Homo sapiens	High	49	6737	6409.9	6288.4	6639.8	6915.3	6771.5	6611.4	6642.5	6913.6	6577.1
Q7L2E3-2	DHX30	Isoform 2 of Putative ATP-dependent RNA helicase DHX30	Homo sapiens	High	13	1744.7	1854.1	1857.1	2006.1	1833.6	1953.3	1791.4	2062.9	1723.8	1842.4
Q7L2E3	DHX30	Putative ATP-dependent RNA helicase DHX30	Homo sapiens	High	61	10855.4	10171	9540.4	10865.5	11502	10653.3	9910.8	10697.4	11190.5	10548.5
Q9H6R0	DHX33	Putative ATP-dependent RNA helicase DHX33	Homo sapiens	High	16	1482	1519.4	1460.8	1582.3	1484.4	1734.5	1495.5	1545.7	1516.1	1562.8
Q14147	DHX34	Probable ATP-dependent RNA helicase DHX34	Homo sapiens	High	25	1620.7	1631.1	1644.3	1644.4	1600.9	1671.6	1644	1723.6	1620.3	1664.1
Q9H5Z1	DHX35	Probable ATP-dependent RNA helicase DHX35	Homo sapiens	High	17	1672.4	1687	1681.9	1775	1684.8	1869.3	1704.6	1680.6	1621.2	1682.7
Q9H2U1	DHX36	ATP-dependent RNA helicase DHX36	Homo sapiens	High	42	6219.8	6444.8	6821.8	6625.1	6693.1	6648.7	6768.6	6366	6611	6593
Q8IY37	DHX37	Probable ATP-dependent RNA helicase DHX37	Homo sapiens	High	40	4017.9	3732.2	4093.4	3822.4	3541	4008.6	4065.4	3843.8	4158.6	4265.5
Q92620	DHX38	Pre-mRNA-splicing factor ATP-dependent RNA helicase PRP16	Homo sapiens	High	35	3346.2	3408.3	4063.6	3254.8	3705.4	3291.5	3812.9	3247.3	3613.7	3908.6
Q8IX18	DHX40	Probable ATP-dependent RNA helicase DHX40	Homo sapiens	High	18	1920.3	1826.8	1833.9	1804.1	1821.8	1934.8	1914.5	1853.5	1861.4	1837.2
Q6P158	DHX57	Putative ATP-dependent RNA helicase DHX57	Homo sapiens	High	37	2579.8	2504.3	2548.4	2630.6	2646.8	2779.7	2709.1	2671.6	2650.1	2703
Q96C10	DHX58	Probable ATP-dependent RNA helicase DHX58	Homo sapiens	High	8	466.3	427.7	455.2	439.6	445.1	463.4	476.9	423.9	498.6	455.3
Q14562	DHX8	ATP-dependent RNA helicase DHX8	Homo sapiens	High	43	5000.9	5424.2	4987.7	5382.7	4895.3	5653.6	5052.9	5285.6	4935.5	4835.8
Q08211	DHX9	ATP-dependent RNA helicase A	Homo sapiens	High	75	16882.8	16863.7	17638.9	16795.7	17171.8	16986.9	17099.5	16930.4	16366	16441.4
Q9NR28	DIABLO	Diablo homolog, mitochondrial	Homo sapiens	High	10	2014	2360.5	2183.3	2378.8	2003	2420.3	2210.7	2449.5	2069.1	2060.7
O60610	DIAPH1	Protein diaphanous homolog 1	Homo sapiens	High	62	15933.7	17147.2	16644.3	16720.8	15089.4	17202.3	15779.4	16758.7	15623	16628.3
O60879	DIAPH2	Protein diaphanous homolog 2	Homo sapiens	High	42	5511.8	5887.7	5574.5	5803.1	5476.3	5945.9	5699.9	5658.2	5472.9	5686.2
Q9NSV4	DIAPH3	Protein diaphanous homolog 3	Homo sapiens	High	32	2660.1	2783.5	2931.7	2724.9	2975.2	3036.8	3037.3	2964.6	2858.6	2863.4
Q9UPY3	DICER1	Endoribonuclease Dicer	Homo sapiens	High	72	7326.3	6919.4	7318.9	6979.4	6960.7	6918.7	7269.2	6920.5	7260.8	7575.4
Q9BTC0	DIDO1	Death-inducer obliterator 1	Homo sapiens	High	74	7939.3	7951.6	7708.5	7923.5	8209.9	7971.9	7561.2	8197.1	7770.5	7556.1
Q68CQ4	DIEXF	Digestive organ expansion factor homolog	Homo sapiens	High	21	3351	3042	3240	3251.5	2789.5	3172.1	3068.9	3142.4	3274.6	3094.7
Q9UNQ2	DIMT1	Probable dimethyladenosine transferase	Homo sapiens	High	16	2350.3	2415.7	2372.5	2491.6	2314.9	2534.9	2417.2	2499.7	2352.1	2333
Q14689	DIP2A	Disco-interacting protein 2 homolog A	Homo sapiens	High	6	129	128.3	135	147.7	167.4	122.3	118.9	132	145.2	140.8
Q9P265	DIP2B	Disco-interacting protein 2 homolog B	Homo sapiens	High	47	4549.4	5063.6	4784.2	5013.6	4661.5	5079.2	4794.2	5015.4	4633.7	4810.3
Q9Y2L1	DIS3	Exosome complex exonuclease RRP44	Homo sapiens	High	51	7789.8	7593	7239.1	7760.6	7775.1	8134.5	7631.8	7905.9	7661.5	7240.2
Q8TF46	DIS3L	DIS3-like exonuclease 1	Homo sapiens	High	18	1050.4	1168.8	1179.8	1151.3	1023.9	1169.6	1146.7	1116.3	1050	1105.2
Q8IYB7	DIS3L2	DIS3-like exonuclease 2	Homo sapiens	High	33	3092.5	3396.3	3431.5	3420.7	3181.6	3495.2	3363.2	3343.8	3134.5	3280.2
Q9NRI5	DISC1	Disrupted in schizophrenia 1 protein	Homo sapiens	High	10	284.3	299.5	317.1	307.9	285.7	315	295.7	262.2	289.3	305.4
Q155Q3	DIXDC1	Dixin	Homo sapiens	High	2	23.3	26.2	26.7	21.4	22.1	31.4	28.1	27.4	23.4	27.3
O60832	DKC1	H/ACA ribonucleoprotein complex subunit 4	Homo sapiens	High	28	6769.1	6055.5	6193.7	6134.1	6753.2	5873.6	6128.2	6191.1	6630.9	6201.2
P10515	DLAT	Dihydrolipoyllysine-residue acetyltransferase component of pyruvate dehydrogenase complex, mitochondrial	Homo sapiens	High	20	2961.9	2666.4	3102.6	2758.9	2937.7	2680.4	2915.9	2611	2824.7	2941.1
P09622	DLD	Dihydrolipoyl dehydrogenase, mitochondrial	Homo sapiens	High	22	6292	6654	6852.9	6594.7	6887.3	6316.7	6740	7068.7	5999.3	6525.2
Q6UYE1	DLEU7	Leukemia-associated protein 7	Homo sapiens	High	2	186.8	186.3	148.8	183.5	206.5	210.4	151.7	188.8	192.6	199.8
Q12959	DLG1	Disks large homolog 1	Homo sapiens	High	19	2375.3	2404	2729.1	2275.1	2179.5	2435.7	2462.1	2180.4	2371.8	2619.1
Q12959-4	DLG1	Isoform 4 of Disks large homolog 1	Homo sapiens	High	5	119.1	94.5	87.3	97	69.9	95.4	100.6	104.6	117.7	116.5
P78352	DLG4	Disks large homolog 4	Homo sapiens	High	1	68.3	77.5	87.6	61.8	76.6	86.6	62.2	71.2	76	93.4
Q9Y2H0	DLGAP4	Disks large-associated protein 4	Homo sapiens	High	14	1479.5	1334.5	1576.4	1325.4	1269.5	1398.8	1429.1	1287.2	1516.7	1644.3
Q15398-3	DLGAP5	Isoform 3 of Disks large-associated protein 5	Homo sapiens	High	6	384.5	370.7	513.7	373.9	503.2	395.9	454.8	366.7	429.2	448
Q15398	DLGAP5	Disks large-associated protein 5	Homo sapiens	High	43	4244.2	3878	4254.5	3968.5	6260.9	4078.7	4287.2	4071.6	4326.6	4522.2
P36957	DLST	Dihydrolipoyllysine-residue succinyltransferase component of 2-oxoglutarate dehydrogenase complex, mitochondrial	Homo sapiens	High	18	3701.8	3697.3	3569	3743.1	3643.7	3687.1	3434.8	3761.3	3462.9	3542.1
Q9NPF5	DMAP1	DNA methyltransferase 1-associated protein 1	Homo sapiens	High	22	2842.4	3332.9	3270.9	3376.8	3069.3	3373.7	3110.6	3134.2	2876.1	2916.5
Q9Y222	DMTF1	Cyclin-D-binding Myb-like transcription factor 1	Homo sapiens	High	4	197.1	202	225.9	189.8	190.8	198.6	200.7	190.4	203.7	212.2
Q09019	DMWD	Dystrophia myotonica WD repeat-containing protein	Homo sapiens	Medium	1	21.2	19.7	19.3	21.5	16.2	22.9	18.2	16.6	17.7	18.9
Q9Y485	DMXL1	DmX-like protein 1	Homo sapiens	High	51	5160.1	5027.9	4737.7	5116.5	4835.9	5195.1	4869.1	5121.2	5015.2	5055.4
Q8TDJ6	DMXL2	DmX-like protein 2	Homo sapiens	High	20	481.9	478	455.3	510.4	468.4	488.8	477.8	530.1	518.2	486.3
P51530	DNA2	DNA replication ATP-dependent helicase/nuclease DNA2	Homo sapiens	High	38	3624.7	3592.2	3802.2	3706.2	3016.2	3852	3865.5	3690.9	3788.8	3770.8
Q9NVR5	DNAAF2	Protein kintoun	Homo sapiens	High	15	1193.3	1174.4	1581.3	1225.5	1338.3	1347.3	1273.1	1040.2	1234.9	1534.5
Q86Y56	DNAAF5	Dynein assembly factor 5, axonemal	Homo sapiens	High	38	4860.7	4837.2	5405.9	4767.7	4736.9	4810.7	4971.1	4694.8	5012	5306.6
Q96DT5	DNAH11	Dynein heavy chain 11, axonemal	Homo sapiens	Medium	2	230.5	206.5	133.7	218.9	217.4	220	195.8	242.5	218	182.5
Q9P225	DNAH2	Dynein heavy chain 2, axonemal	Homo sapiens	Medium	2	203.7	199.6	243.4	197.8	186.7	210.4	224.7	177.5	201.3	238.9
Q8TD57	DNAH3	Dynein heavy chain 3, axonemal	Homo sapiens	High	1	78.4	81.6	114.2	73.9	101.5	66	110.5	86.6	88.5	104.2
Q96JB1	DNAH8	Dynein heavy chain 8, axonemal	Homo sapiens	High	3	59.8	53.9	31.9	46.4	59.2	53.1	43.7	55	59.3	40.7
P31689	DNAJA1	DnaJ homolog subfamily A member 1	Homo sapiens	High	24	3893.6	4067.5	3939.2	4222.1	4798.2	4252.6	3956.1	3854.2	3610.9	3921.1
O60884	DNAJA2	DnaJ homolog subfamily A member 2	Homo sapiens	High	18	3070.6	3062.1	4114.9	3106.4	3279.5	3194.9	3645.7	2711.5	3142.6	3685
Q96EY1-2	DNAJA3	Isoform 2 of DnaJ homolog subfamily A member 3, mitochondrial	Homo sapiens	High	5	44.8	55	68.5	53.4	52.7	57.6	51.1	55.6	55.9	53
Q96EY1	DNAJA3	DnaJ homolog subfamily A member 3, mitochondrial	Homo sapiens	High	19	2461.5	2388	2695.6	2455.4	2689.7	2433.4	2582.7	2350.7	2380.7	2671.6
P25685	DNAJB1	DnaJ homolog subfamily B member 1	Homo sapiens	High	27	4121.6	3739.1	3554	3714.3	4429.5	3671.6	3705.4	4017.8	4138.8	3708.1
Q9UBS4	DNAJB11	DnaJ homolog subfamily B member 11	Homo sapiens	High	17	1976.3	2079.9	2298.2	2030.8	2240.2	2042.3	2213.7	2016.2	1971	2068.5
Q9NXW2	DNAJB12	DnaJ homolog subfamily B member 12	Homo sapiens	High	12	1607.3	1704.3	1635.6	1845.3	1793.4	1883.8	1569.4	1745.5	1600.6	1637.6
Q8TBM8	DNAJB14	DnaJ homolog subfamily B member 14	Homo sapiens	High	13	1814.3	1941.6	2130.6	2037.9	2053.3	1992.7	2001.9	2007	1870.8	2045.9
P25686	DNAJB2	DnaJ homolog subfamily B member 2	Homo sapiens	High	2	185.4	247.4	229.1	194.6	222.6	241.6	217.9	245.9	222.4	230.2
Q9UDY4	DNAJB4	DnaJ homolog subfamily B member 4	Homo sapiens	High	14	1384	1615.3	1253.9	1558.6	1585.9	1476.7	1472.7	1643.8	1305.2	1419
O75953	DNAJB5	DnaJ homolog subfamily B member 5	Homo sapiens	High	7	613.6	628	587.9	643.4	568.7	625.8	594.5	640.4	584.9	611.1
O75190	DNAJB6	DnaJ homolog subfamily B member 6	Homo sapiens	High	11	1332.7	1337.1	1676	1346.4	1408	1397.5	1426.5	1277.9	1423.8	1562.5
Q96KC8	DNAJC1	DnaJ homolog subfamily C member 1	Homo sapiens	High	12	1007.7	944.1	894.1	1019.1	1053	1049.1	984.6	1037.7	1007.1	1002.4
Q8IXB1	DNAJC10	DnaJ homolog subfamily C member 10	Homo sapiens	High	22	1903	2107.1	1940.8	2018.1	1893.1	2144.2	1970	2060.1	1913.6	1900.2
Q9NVH1	DNAJC11	DnaJ homolog subfamily C member 11	Homo sapiens	High	17	1432	1425.1	1475.8	1309.9	1575.3	1405.3	1401.4	1343.1	1534.4	1449.2
O75165	DNAJC13	DnaJ homolog subfamily C member 13	Homo sapiens	High	78	8099.4	8196.1	9023.4	8287.3	7917.7	8624.5	8426	7846.6	8344.3	8344.5
Q6Y2X3	DNAJC14	DnaJ homolog subfamily C member 14	Homo sapiens	High	3	63.1	67.5	66.1	75	59.6	71	73.8	75.7	58.7	64.4
Q9Y5T4	DNAJC15	DnaJ homolog subfamily C member 15	Homo sapiens	High	8	617	682.1	750.8	701.7	684.5	769.3	740.8	660.2	705.8	741.8
Q9Y2G8	DNAJC16	DnaJ homolog subfamily C member 16	Homo sapiens	High	18	1327.7	1319.9	1303.1	1337.4	1476.8	1312.9	1390.5	1280.3	1390.4	1386.8
Q9NVM6	DNAJC17	DnaJ homolog subfamily C member 17	Homo sapiens	High	8	898.6	805.5	738.4	863.3	943.8	842.5	778.9	926.6	878.7	840.1
Q96DA6	DNAJC19	Mitochondrial import inner membrane translocase subunit TIM14	Homo sapiens	High	9	3179.5	2949	2497.7	2843	3397.9	2842.3	2919.9	3197.8	3031.7	2784.6
Q99543	DNAJC2	DnaJ homolog subfamily C member 2	Homo sapiens	High	30	3789.7	4466.2	4205.6	4269.1	3984.7	4533.6	3896.3	4200.3	3700.8	4127.8
Q5F1R6	DNAJC21	DnaJ homolog subfamily C member 21	Homo sapiens	High	23	2400.2	2508.5	2517.5	2463.1	2634.3	2581.4	2540	2436.6	2449.1	2561.8
Q6P3W2	DNAJC24	DnaJ homolog subfamily C member 24	Homo sapiens	High	2	204	238	280	217.8	190.8	212.5	241.9	220.8	216.5	252.2
Q9H1X3	DNAJC25	DnaJ homolog subfamily C member 25	Homo sapiens	High	5	364.1	398.1	418.1	427.8	377.6	428.4	380.3	351.9	359.1	413.3
Q13217	DNAJC3	DnaJ homolog subfamily C member 3	Homo sapiens	High	27	2777.2	2701.6	2608.3	2806	2847.7	2862.1	2663.5	2754.3	2720.2	2557.1
Q96LL9	DNAJC30	DnaJ homolog subfamily C member 30	Homo sapiens	High	3	264.8	302.2	372.6	310.9	313.1	366.2	315.8	274.9	277.1	322.6
Q9H3Z4-2	DNAJC5	Isoform 2 of DnaJ homolog subfamily C member 5	Homo sapiens	Medium	1	13.9	13.2	19.7	13.9	5.2	15.6	14.2	12.1	10.8	14.2
Q9H3Z4	DNAJC5	DnaJ homolog subfamily C member 5	Homo sapiens	High	7	1121	868	1150.2	809.7	1132.4	787.6	1222	829.2	1130.9	1116.3
O75061	DNAJC6	Putative tyrosine-protein phosphatase auxilin	Homo sapiens	High	2	96.4	136.3	89.9	120.5	92.5	123.3	102.5	139.5	93.6	94.4
Q99615	DNAJC7	DnaJ homolog subfamily C member 7	Homo sapiens	High	36	6484.7	7293.2	7644.9	7144.2	7024.4	7346	6823.8	6691	6431	6958.3
O75937	DNAJC8	DnaJ homolog subfamily C member 8	Homo sapiens	High	17	4131.4	3813.3	3881.6	3674.5	4088.2	3641.6	3992.4	3656.9	3977	3867.7
Q8WXX5	DNAJC9	DnaJ homolog subfamily C member 9	Homo sapiens	High	19	4747.2	4822.5	4898	4510.5	4565.5	4289.7	4820.7	4571.3	4332.4	4642.6
Q4LDG9	DNAL1	Dynein light chain 1, axonemal	Homo sapiens	High	5	506.2	477.9	501.3	492.3	553.1	559.9	519.1	493.4	514.9	506.9
O00115	DNASE2	Deoxyribonuclease-2-alpha	Homo sapiens	High	5	748.4	684	586	738	733.5	711.9	602.6	787.9	733.3	687.1
Q5SXM8	DNLZ	DNL-type zinc finger protein	Homo sapiens	High	2	84.3	102.9	105.5	87.7	73.6	106.3	101.3	106.6	101.2	108.9
O00429-8	DNM1L	Isoform 8 of Dynamin-1-like protein	Homo sapiens	Medium	6	44.6	49.8	58.3	46.4	49.5	48.9	50.2	43.9	46.8	48.1
O00429	DNM1L	Dynamin-1-like protein	Homo sapiens	High	42	6200.5	6085.6	6405	6159	6356.7	6224.2	6309.4	6228.9	6350.4	6623.9
P50570	DNM2	Dynamin-2	Homo sapiens	High	42	11405.3	10843.2	10544.8	10968.7	11146.1	10859.6	10835.7	11291.8	11159.6	10583.2
P50570-4	DNM2	Isoform 4 of Dynamin-2	Homo sapiens	Medium	10	210.1	146.3	72.1	161.6	209	137.9	125.5	190.9	156.5	142.7
Q9UQ16	DNM3	Dynamin-3	Homo sapiens	High	2	225.2	189.5	265.5	184.8	223	185	269	189.8	214.6	252
Q6XZF7	DNMBP	Dynamin-binding protein	Homo sapiens	High	3	176.5	164	158.5	162.6	176.9	182.1	157.5	180.3	172	179.4
P26358	DNMT1	DNA (cytosine-5)-methyltransferase 1	Homo sapiens	High	78	12134.2	12249.9	12545.1	12220.4	11515.4	12008.3	12156.2	12116.2	11984.1	11958.1
Q9Y6K1	DNMT3A	DNA (cytosine-5)-methyltransferase 3A	Homo sapiens	High	41	5175	5261.7	5515.9	5378.1	5093.2	5574.2	5341.8	5236.2	5363.7	5317.4
Q9UBC3	DNMT3B	DNA (cytosine-5)-methyltransferase 3B	Homo sapiens	High	16	668.8	642.2	785.6	658.9	595.5	664.8	784.1	707.7	679.7	734.3
Q9ULA0	DNPEP	Aspartyl aminopeptidase	Homo sapiens	High	18	2997.5	2894.5	2540.5	2932.6	2944	2887.2	2721	3061.1	2848.3	2847.5
O43598	DNPH1	2'-deoxynucleoside 5'-phosphate N-hydrolase 1	Homo sapiens	High	4	223.3	233.4	230	244.1	207.7	274.5	202.8	240	215.1	191
Q9H147	DNTTIP1	Deoxynucleotidyltransferase terminal-interacting protein 1	Homo sapiens	High	12	699.7	696.3	647.4	719.7	679.2	767.8	672.2	724.2	656.9	667.9
[truncated: 6,782 more rows]
