# Supplementary material for: Antagonism of PP2A is an independent and conserved function of HIV-1 Vif and causes cell cycle arrest
Source: eLife. 2020 Apr 15;9:e53036. doi: 10.7554/eLife.53036 (PMC7920553; doi:10.7554/eLife.53036)
Supplement: Figure 6—source data 1. — Complete dataset (unfiltered) from TMT-based quantitative proteomic experiment illustrated in Figure 6A. For each protein, normalised, unscaled protein abundances, the number of unique peptides used for protein quantitation, and the protein FDR confidence are shown. [file elife-53036-fig6-data1.xlsx]

## Sheet: Proteomic experiment 2
Accession	Gene ID	Description	Taxonomy	Protein FDR Confidence	# Unique Peptides	Mock_1	Mock_2	Mock_3	Ctrl	NL4-3 WT	CH470 WT	YU2 WT	NL4-3 RI127/128YR	HXB2 WT	NL4-3 I31V	NL4-3 AYR
Q96IC2	44M2.3	Putative RNA exonuclease NEF-sp	Homo sapiens	High	5	106.6	101.5	108.8	107.8	76.9	85.4	102.5	111.2	119.3	106.1	110.7
P01023	A2M	Alpha-2-macroglobulin	Homo sapiens	High	3	326.8	235.6	219.2	405.6	367.6	326	270.2	229.3	208	256.5	240.4
A8K2U0	A2ML1	Alpha-2-macroglobulin-like protein 1	Homo sapiens	Medium	1	62.4	53.5	55	83	56.3	140.6	65.7	70.6	47.6	189.8	72.7
Q9NRG9	AAAS	Aladin	Homo sapiens	High	20	927.1	932.2	907.9	1042.6	1119.6	1140.3	1009.5	1080.7	961.7	1040.9	1004.7
Q86V21	AACS	Acetoacetyl-CoA synthetase	Homo sapiens	High	16	759.2	747	742.1	762	701.3	695.2	709.2	686	747.4	707.9	716.3
Q8N5Z0	AADAT	Kynurenine/alpha-aminoadipate aminotransferase, mitochondrial	Homo sapiens	High	6	188.9	163.8	185.2	173.6	176.5	171.8	162.4	152.3	167.5	174.9	161.7
Q6PD74	AAGAB	Alpha- and gamma-adaptin-binding protein p34	Homo sapiens	High	7	502.8	478.8	498.7	505.5	358.6	427.3	470	422.5	478.8	449.2	486.3
A0A096LP25	AAK1	AP2-associated protein kinase 1 (Fragment)	Homo sapiens	High	3	157.9	172.4	152.2	146.4	90.2	61.9	140.9	148.9	159.5	139.1	153.5
Q2M2I8	AAK1	AP2-associated protein kinase 1	Homo sapiens	High	18	884.4	959.1	918.4	914.9	1072.2	848	1028.4	1081.6	942.3	862	949.6
Q9H7C9	AAMDC	Mth938 domain-containing protein	Homo sapiens	High	3	120.6	107	112	121.3	122.5	86.4	110.9	90.9	119.4	105.8	114.3
Q13685	AAMP	Angio-associated migratory cell protein	Homo sapiens	High	15	945.8	1002.7	995.5	969.3	1175.1	1106.2	1124.3	1077.5	1045.1	928.7	992
Q9Y312	AAR2	Protein AAR2 homolog	Homo sapiens	High	13	1191.8	1286.5	1138.6	1144.9	1493.4	1557.2	1301.9	1317.7	1262.3	1272.5	1150.7
P49588	AARS	Alanine--tRNA ligase, cytoplasmic	Homo sapiens	High	51	7631.7	7856.9	7665.4	7344.3	7530.7	7240.3	7987	7729.8	7480.5	8153.2	7625.5
Q5JTZ9	AARS2	Alanine--tRNA ligase, mitochondrial	Homo sapiens	High	29	1178	1147.2	1156.4	1180.6	1389.8	1278.9	1209.2	1205.5	1204.2	1094	1104.8
Q9BTE6	AARSD1	Alanyl-tRNA editing protein Aarsd1	Homo sapiens	High	20	1479.6	1458.4	1445.4	1495.8	1581	1726.3	1438.8	1454.6	1443.7	1492.6	1491.7
Q9NRN7	AASDHPPT	L-aminoadipate-semialdehyde dehydrogenase-phosphopantetheinyl transferase	Homo sapiens	High	16	2073.6	2052.3	1995	2063.8	2260.5	2303.7	1968.4	2012	2046.4	2068.5	2098.4
Q9UDR5	AASS	Alpha-aminoadipic semialdehyde synthase, mitochondrial	Homo sapiens	High	21	887.9	863.2	910.7	911.3	908.8	880.3	924.1	888.9	900.5	850.6	906.8
Q9NY61	AATF	Protein AATF	Homo sapiens	High	17	1097.2	1094.5	1118	1068.3	1024.6	928.7	1054.6	1097.8	1116.2	1051.2	1094.9
P80404	ABAT	4-aminobutyrate aminotransferase, mitochondrial	Homo sapiens	High	13	545.8	544.9	538.2	589.2	604.8	625.9	556.4	562.2	543.3	549.9	529.5
Q9NRK6	ABCB10	ATP-binding cassette sub-family B member 10, mitochondrial	Homo sapiens	High	26	2333.5	2274.4	2256.9	2374.1	2057.8	2339.7	1998.8	2010.7	2217.3	2220.8	2040.3
O75027	ABCB7	ATP-binding cassette sub-family B member 7, mitochondrial	Homo sapiens	High	20	1776.5	1689.4	1706.5	1717.5	1739.9	1883.6	1653.2	1611.8	1737.6	1690.8	1661.4
Q9NUT2	ABCB8	ATP-binding cassette sub-family B member 8, mitochondrial	Homo sapiens	High	11	394.5	394	380	407.6	397.2	464	378.2	391.1	394	386.8	384
P33527	ABCC1	Multidrug resistance-associated protein 1	Homo sapiens	High	35	1668.4	1655	1684.2	1735.1	1490.6	1578.9	1550.8	1620.7	1676.2	1632.3	1716.1
O15438	ABCC3	Canalicular multispecific organic anion transporter 2	Homo sapiens	High	1	60.1	66.5	57	68	63.3	64.7	65.8	70.6	60.9	28.7	71.3
O15439	ABCC4	Multidrug resistance-associated protein 4	Homo sapiens	High	10	314.3	304.2	297.4	333.3	352.8	334.1	331.4	339.7	282.6	303.5	346.7
O15440	ABCC5	Multidrug resistance-associated protein 5	Homo sapiens	High	9	452.2	410.1	427.9	439.9	387.6	510.3	405.4	451.6	415	488.7	413.9
P28288	ABCD3	ATP-binding cassette sub-family D member 3	Homo sapiens	High	27	2098	1974.1	2084.2	2095.4	2112.7	2322.7	2039.6	1996.4	2081.9	2099.7	2117.5
O14678	ABCD4	ATP-binding cassette sub-family D member 4	Homo sapiens	High	4	56.9	60.8	56.6	65.8	67.1	58.9	57.3	60.7	55.3	55.8	62.8
P61221	ABCE1	ATP-binding cassette sub-family E member 1	Homo sapiens	High	34	4331.3	4660.4	4372.6	4429.1	4456.7	4616	4892.8	4521.2	4444.9	4686.7	4673.4
Q8NE71	ABCF1	ATP-binding cassette sub-family F member 1	Homo sapiens	High	43	3509.7	3487.3	3518	3440.8	3342.5	3868.6	3386.7	3400.7	3444.5	3306.1	3399.5
Q9UG63	ABCF2	ATP-binding cassette sub-family F member 2	Homo sapiens	High	35	3717.6	3616.9	3721.7	3764	4220.7	4484.8	3875.3	3800.7	3682.2	3571.3	3786.5
Q9NUQ8	ABCF3	ATP-binding cassette sub-family F member 3	Homo sapiens	High	23	1037.2	1019.2	1027.2	1024.1	1125.7	1156.1	1050.5	1041.8	999.6	1024.3	1016.7
Q9NUJ1	ABHD10	Mycophenolic acid acyl-glucuronide esterase, mitochondrial	Homo sapiens	High	13	1457.3	1344.6	1390.2	1272.4	1276.5	1277.7	1280.9	1133.7	1357.6	1331.6	1272.7
Q8NFV4	ABHD11	Protein ABHD11	Homo sapiens	High	5	281.9	251	272.9	231.4	292.3	204.6	228.2	205.6	266.8	257.4	265.5
Q8N2K0	ABHD12	Monoacylglycerol lipase ABHD12	Homo sapiens	High	12	469.3	483.9	471.3	557.6	489.3	552.1	462.7	499.9	487	513.4	495.6
Q7L211	ABHD13	Protein ABHD13	Homo sapiens	High	1	19.5	21.3	15.9	24.2	24	20.2	27.6	23.5	21.8	23.7	22.9
Q96IU4	ABHD14B	Protein ABHD14B	Homo sapiens	High	8	662	606.6	614.6	611.8	573.5	462.9	552.2	522.9	651.7	565.5	604.3
Q6UXT9	ABHD15	Protein ABHD15	Homo sapiens	High	4	83.8	69.7	83	87.9	76.9	96.9	68.9	92.8	76.6	72.9	92.2
O95870	ABHD16A	Protein ABHD16A	Homo sapiens	High	13	343.8	335	363.6	352.9	384.5	326.6	379.5	384.8	305	331.4	354.4
Q96GS6	ABHD17A	Protein ABHD17A	Homo sapiens	High	2	30	29	33.1	29.7	34.6	20.5	29.5	26.5	30.3	28.3	34.1
Q5VST6	ABHD17B	Protein ABHD17B	Homo sapiens	High	8	661.4	632.5	660.6	666.2	676.9	575.9	618.7	610.8	617.9	577.9	679.7
Q8WU67	ABHD3	Phospholipase ABHD3	Homo sapiens	High	1	76.1	69.7	77.9	79.3	72	82.4	69.9	81.8	65.9	74.6	72.3
Q8WTS1	ABHD5	1-acylglycerol-3-phosphate O-acyltransferase ABHD5	Homo sapiens	High	1	18.5	14.2	14.2	24.7	25.5	33.6	21.4	19.4	16.1	21.2	20.3
Q9BV23	ABHD6	Monoacylglycerol lipase ABHD6	Homo sapiens	High	3	162	163.1	185.1	155.9	187.2	136.4	155	160.6	163.8	141.8	172.8
Q8IZP0	ABI1	Abl interactor 1	Homo sapiens	High	9	727.3	756.5	775.9	775.5	766.2	622.8	825.7	807.3	724.3	721.5	787.4
Q9NYB9	ABI2	Abl interactor 2	Homo sapiens	High	5	125.4	125.3	133.2	134.4	138.6	112.6	136	121.5	113.9	127.8	123.5
Q9P2A4	ABI3	ABI gene family member 3	Homo sapiens	Medium	1	80	69.8	75.5	75.3	70.3	49.6	67.5	65	65.4	73.9	73.8
P00519	ABL1	Tyrosine-protein kinase ABL1	Homo sapiens	High	9	372	363.5	346.4	337.9	340.4	292.2	383.4	362.5	358	341.4	368.5
P42684	ABL2	Abelson tyrosine-protein kinase 2	Homo sapiens	High	10	334.9	327.8	344.6	315.3	344.2	319	343.5	319.3	344.1	308.6	329.2
O14639	ABLIM1	Actin-binding LIM protein 1	Homo sapiens	High	19	957.9	907.7	954.5	917	886.5	735	962.5	962.7	905.5	952	949.8
Q12979	ABR	Active breakpoint cluster region-related protein	Homo sapiens	High	9	316.5	319.3	311.9	333.8	466.1	322.5	321.2	347.3	345.3	384.1	341.8
Q9P1F3	ABRACL	Costars family protein ABRACL	Homo sapiens	High	2	302.5	358.8	328.5	318.3	415.1	270.8	361.2	334.8	418.5	366.2	334.9
Q9ULW3	ABT1	Activator of basal transcription 1	Homo sapiens	High	14	980.5	896.7	927.7	898	722.3	663.7	762.1	786.3	934	867.6	961.8
P09110	ACAA1	3-ketoacyl-CoA thiolase, peroxisomal	Homo sapiens	High	18	955.4	986.9	960	1001.6	994	986.5	991.8	1042.7	970.8	925.9	960.6
H0Y4D4	ACAA1	3-ketoacyl-CoA thiolase, peroxisomal (Fragment)	Homo sapiens	Medium	4	209	231.8	221.4	230.8	231.6	208.8	218.5	206.4	219.6	207.7	208.8
P42765	ACAA2	3-ketoacyl-CoA thiolase, mitochondrial	Homo sapiens	High	21	1085.2	1171.6	1110.8	1134	1175.7	1147.1	1165.2	1142.4	1232.1	1069.4	1104.6
Q13085	ACACA	Acetyl-CoA carboxylase 1	Homo sapiens	High	97	7184.9	7014.4	7055.4	7270.8	7599.3	7744.1	6846	7259.8	6782.6	6699.5	7240.2
Q6JQN1	ACAD10	Acyl-CoA dehydrogenase family member 10	Homo sapiens	High	10	131.8	125.7	129	125.4	120.2	109.4	122.9	116.1	123.2	109.3	126.1
Q9UKU7	ACAD8	Isobutyryl-CoA dehydrogenase, mitochondrial	Homo sapiens	High	14	478.8	464.2	527	485.2	555	538.7	523.1	518	519.8	423.6	484.2
Q9H845	ACAD9	Acyl-CoA dehydrogenase family member 9, mitochondrial	Homo sapiens	High	32	1534.1	1467.4	1505.3	1559.8	1522.9	1609.4	1468.2	1469.2	1464.5	1459.2	1572.7
P11310	ACADM	Medium-chain specific acyl-CoA dehydrogenase, mitochondrial	Homo sapiens	High	29	2923.2	2903.4	2949.1	2769.2	2621.8	3011	2806.2	2543.5	3082.7	2874.5	2821.5
P16219	ACADS	Short-chain specific acyl-CoA dehydrogenase, mitochondrial	Homo sapiens	High	1	74.4	72	61.4	68.7	75	47.3	66.6	68.9	80.3	62.6	72.6
P45954	ACADSB	Short/branched chain specific acyl-CoA dehydrogenase, mitochondrial	Homo sapiens	High	14	665.4	683.1	664	698.1	775.9	792.6	716.9	753.7	699	676.8	722.7
P49748	ACADVL	Very long-chain specific acyl-CoA dehydrogenase, mitochondrial	Homo sapiens	High	38	3384.2	3364.7	3333.2	3231.9	3392.9	3306	3310.3	3216.2	3402.4	3201.5	3050
Q15027	ACAP1	Arf-GAP with coiled-coil, ANK repeat and PH domain-containing protein 1	Homo sapiens	High	32	2271.6	2389.6	2355.9	2391.8	2278.5	2144.2	2334.7	2388.2	2284	2200.2	2349.5
Q15057	ACAP2	Arf-GAP with coiled-coil, ANK repeat and PH domain-containing protein 2	Homo sapiens	High	33	1238	1265.9	1287.6	1348.2	1215.7	1230.9	1358.7	1361.9	1281.3	1359.6	1313.7
Q96P50	ACAP3	Arf-GAP with coiled-coil, ANK repeat and PH domain-containing protein 3	Homo sapiens	High	1	15.1	13.1	15.4	15.6	12.8	12.3	15.6	13	13.9	16.1	16.4
P24752	ACAT1	Acetyl-CoA acetyltransferase, mitochondrial	Homo sapiens	High	29	3527.3	3730.3	3751.4	3535.7	3854.4	3677.6	3739.3	3539.2	3958.2	3547	3627.8
Q9BWD1	ACAT2	Acetyl-CoA acetyltransferase, cytosolic	Homo sapiens	High	19	1945.2	1925.5	1911.5	2207.9	2558.3	2194.8	2478.3	2472.7	2051.7	2250.1	2269
Q9H3P7	ACBD3	Golgi resident protein GCP60	Homo sapiens	High	21	1343.7	1312.8	1330.7	1321	1269.8	1390.6	1362.2	1274	1378.9	1301.8	1252
Q5T8D3	ACBD5	Acyl-CoA-binding domain-containing protein 5	Homo sapiens	High	8	200.3	199.9	195.8	213.7	179	188.2	184.5	185.6	196.5	205.8	188.3
Q5T8D3-3	ACBD5	Isoform 3 of Acyl-CoA-binding domain-containing protein 5	Homo sapiens	Medium	2	340.4	282.5	340.2	390.8	376.6	418.4	335.3	354.3	331.2	411.4	399
Q9BR61	ACBD6	Acyl-CoA-binding domain-containing protein 6	Homo sapiens	High	12	574.1	615.1	576.2	429.2	587.8	535.9	507.1	520.1	573.6	480	455.6
Q8N6N7	ACBD7	Acyl-CoA-binding domain-containing protein 7	Homo sapiens	High	2	55.9	69.9	61.5	71.7	61.8	56	59.5	70.8	58.8	62	70.9
Q96AP0	ACD	Adrenocortical dysplasia protein homolog	Homo sapiens	High	4	103.4	108.5	110.5	114.4	105.4	114.7	110.9	122.3	104	97.7	105.7
Q9UKV3	ACIN1	Apoptotic chromatin condensation inducer in the nucleus	Homo sapiens	High	54	4112.4	4050.7	4175	4074.9	3684.5	3934.8	4045.9	3994.6	4057.2	3968.3	3899.8
P53396	ACLY	ATP-citrate synthase	Homo sapiens	High	54	7875.2	7953.2	7839.3	8477.7	8339.8	8532.4	7984	8367.5	8029	8040.2	8294
Q8TDX5	ACMSD	2-amino-3-carboxymuconate-6-semialdehyde decarboxylase	Homo sapiens	Medium	1	55.1	55.8	53.7	44.2	67.4	53.9	76.3	77.4	73	93.9	46.5
P21399	ACO1	Cytoplasmic aconitate hydratase	Homo sapiens	High	38	3866.4	3946.5	3854.2	3961.6	3765.2	3508.3	3898.4	3979	3873.9	3870.8	3904.9
Q99798	ACO2	Aconitate hydratase, mitochondrial	Homo sapiens	High	44	4556.9	4356.9	4656.3	4597.1	4521.5	5220.8	4579.6	4476.1	4468.2	4465.5	4629
Q86TX2	ACOT1	Acyl-coenzyme A thioesterase 1	Homo sapiens	High	23	1373.9	1387.8	1357.3	1337.6	1377.8	1433.7	1281.5	1249.8	1363.1	1347.6	1289.3
Q9NPJ3	ACOT13	Acyl-coenzyme A thioesterase 13	Homo sapiens	High	5	445	435.8	415.9	444.2	464.1	412	413	390.7	471.5	389.7	447.1
O00154	ACOT7	Cytosolic acyl coenzyme A thioester hydrolase	Homo sapiens	High	16	2812.5	2827.4	2819.4	2761.2	2857.4	3241.1	2658.8	2772.3	2871.3	3009.7	2927.9
O14734	ACOT8	Acyl-coenzyme A thioesterase 8	Homo sapiens	High	14	506.2	498.8	506.9	512.8	530.5	607.5	524.8	473	524.2	502.1	522.1
Q15067	ACOX1	Peroxisomal acyl-coenzyme A oxidase 1	Homo sapiens	High	22	1440.1	1451.2	1424.2	1636.9	1651.9	1419.4	1573.3	1565.9	1522.8	1455.1	1564
O15254	ACOX3	Peroxisomal acyl-coenzyme A oxidase 3	Homo sapiens	High	9	439	428.2	412.5	436.8	430.9	389.3	440.6	448.9	411.9	420.7	421
P24666	ACP1	Low molecular weight phosphotyrosine protein phosphatase	Homo sapiens	High	7	517.1	564	510.9	565.2	558	593.9	492.6	510.9	570.5	505.2	536.2
P24666-2	ACP1	Isoform 2 of Low molecular weight phosphotyrosine protein phosphatase	Homo sapiens	Medium	1	16.8	16.2	17.8	20.6	23.5	16.1	12.5	17.8	25.1	18.4	15.6
P11117	ACP2	Lysosomal acid phosphatase	Homo sapiens	High	5	186.2	177.4	186.1	186.5	213.6	212.2	191.7	175.2	185.9	195.4	186.6
Q9NPH0	ACP6	Lysophosphatidic acid phosphatase type 6	Homo sapiens	High	2	68.1	53.8	62	63.6	63.1	64.3	53.2	63.6	61.1	66	69.9
Q96CM8	ACSF2	Acyl-CoA synthetase family member 2, mitochondrial	Homo sapiens	High	9	578.5	631.4	626.9	638.4	624.3	582.3	678.7	584.7	661.2	590.4	603.3
Q4G176	ACSF3	Acyl-CoA synthetase family member 3, mitochondrial	Homo sapiens	High	21	1156.6	1182.8	1197.9	1228.9	1046	1068.5	1094.8	1100.6	1225.3	1176.2	1182.6
O95573	ACSL3	Long-chain-fatty-acid--CoA ligase 3	Homo sapiens	High	28	1993	2076.5	2153.7	2137.8	2331.7	2475.7	2275.5	2358.9	2108.5	2295.9	2186.6
O60488	ACSL4	Long-chain-fatty-acid--CoA ligase 4	Homo sapiens	High	37	4646.3	5049.9	4844	4722.1	4689.4	4554.1	4570.2	4718.1	4812.4	4566.4	4731
Q9ULC5	ACSL5	Long-chain-fatty-acid--CoA ligase 5	Homo sapiens	High	13	610.6	581.8	626.2	637.9	695.9	663.3	634	639.4	617.8	639	650.9
Q53FZ2	ACSM3	Acyl-coenzyme A synthetase ACSM3, mitochondrial	Homo sapiens	High	12	383.5	403.6	414	434.6	422.5	415.5	433.3	420.4	399.1	409.7	411.4
Q9NUB1	ACSS1	Acetyl-coenzyme A synthetase 2-like, mitochondrial	Homo sapiens	High	19	1044	1040.5	1083.3	1110.9	981.3	1004.4	960.4	980.6	1063.6	1003.5	1102.4
Q9NR19	ACSS2	Acetyl-coenzyme A synthetase, cytoplasmic	Homo sapiens	Medium	1	15.9	17.1	17.9	13.7	11.5	11.9	15.5	11.2	13.5	11.8	15
Q562R1	ACTBL2	Beta-actin-like protein 2	Homo sapiens	High	5	355.7	321.9	451.8	299.6	344.3	331.4	407	426.8	398.6	300	300.9
P68032	ACTC1	Actin, alpha cardiac muscle 1	Homo sapiens	High	3	2997	3229.4	3044.2	2962.3	2393.8	3070.8	2948.7	2964.9	3212.3	2931.1	3057.3
P63261	ACTG1	Actin, cytoplasmic 2	Homo sapiens	High	11	33854.6	35636.5	34704	34683.4	32217.4	35164	36708.3	34775.3	35357.5	38063.4	36047
K7EM38	ACTG1	Actin, cytoplasmic 2 (Fragment)	Homo sapiens	High	2	152.1	131.7	152.2	157.3	294.6	245.7	162.3	141.7	149.3	150.6	156
O96019	ACTL6A	Actin-like protein 6A	Homo sapiens	High	15	2014.6	2086.4	2200.4	2194.8	2152	2226	2070.7	2244.2	2242.2	2066.2	2154.4
O94805	ACTL6B	Actin-like protein 6B	Homo sapiens	High	1	70.4	69.8	77.8	68.6	78.8	75.9	70.6	66.9	73.2	73.3	60.2
P12814	ACTN1	Alpha-actinin-1	Homo sapiens	High	33	5363.8	5353.3	5410.6	5448.2	5275.1	5056.6	5292.9	5339.1	5005.1	4943.4	5448.8
P35609	ACTN2	Alpha-actinin-2	Homo sapiens	High	3	131.8	122.5	114.1	83	121.3	209.3	88.2	111.1	92.1	197.4	227.6
O43707	ACTN4	Alpha-actinin-4	Homo sapiens	High	48	8869.7	9236.6	8849.7	8955.4	8712.9	8020.9	9046.9	8812.6	8597.3	8788.4	8987.4
Q9NZ32	ACTR10	Actin-related protein 10	Homo sapiens	High	19	1448.1	1492.8	1430.6	1388.8	1404.1	1255.5	1429.6	1381.4	1498.8	1439.8	1436.4
P61163	ACTR1A	Alpha-centractin	Homo sapiens	High	11	3234.9	3302.5	3162	3198.9	3452	3004.8	3489.4	3126.3	3399.3	3371	3209.9
P42025	ACTR1B	Beta-centractin	Homo sapiens	High	6	371.5	371.6	359.2	412.6	321.5	363.5	367.1	379.6	379.8	402.7	398.8
P61160	ACTR2	Actin-related protein 2	Homo sapiens	High	18	2409.7	2382.6	2402.9	2454.1	2457	2452.4	2393.5	2363.8	2444.8	2303.3	2495.5
P61158	ACTR3	Actin-related protein 3	Homo sapiens	High	19	2381.7	2457	2475.3	2595.7	2756.2	2654.5	2689.4	2548.8	2427.5	2371.7	2606.4
Q9P1U1	ACTR3B	Actin-related protein 3B	Homo sapiens	High	2	20.2	22.8	19.7	26.6	23.3	22.6	23.8	23.7	18.8	21.1	21.1
Q9H9F9	ACTR5	Actin-related protein 5	Homo sapiens	High	15	749.8	778.2	755.2	693.8	921.5	812.5	825.9	807.3	788.6	757	734.7
Q9GZN1	ACTR6	Actin-related protein 6	Homo sapiens	High	7	300.1	291.5	309.9	310.2	300.1	298.6	280.1	292.7	314.5	296.9	299.8
Q9H981	ACTR8	Actin-related protein 8	Homo sapiens	High	12	668.2	620.1	675.8	635.1	695.3	674.4	619	646.8	669.1	639.2	695.4
P36896	ACVR1B	Activin receptor type-1B	Homo sapiens	High	1	40.8	37.2	33.5	32.7	37.2	26.1	34.6	36.1	32.6	34	38.7
Q03154	ACY1	Aminoacylase-1	Homo sapiens	High	17	1137.6	1083.1	1140.9	1192	1112.8	1048.9	1149.7	1098.3	1119.3	1047.8	1131.4
Q96HD9	ACY3	N-acyl-aromatic-L-amino acid amidohydrolase (carboxylate-forming)	Homo sapiens	High	3	38	37.4	36.3	33.2	42.3	37.3	40.8	37.5	45.3	37.5	34.4
P07311	ACYP1	Acylphosphatase-1	Homo sapiens	High	8	435.7	402.2	405.9	409.2	386.5	296.9	333.9	353.5	433.3	461.7	416.3
P14621	ACYP2	Acylphosphatase-2	Homo sapiens	High	2	31.6	26.9	23.8	23.3	37.1	30.5	30	26.1	23.3	32.1	34
P00813	ADA	Adenosine deaminase	Homo sapiens	High	23	3283.6	3150.6	3176.1	3057.1	2890.8	2519.8	2807.6	2590.6	3064.2	2737.5	3145.9
Q6DHV7	ADAL	Adenosine deaminase-like protein	Homo sapiens	High	3	58.2	58.6	55.6	51.6	52.3	61.2	52.7	57.2	47.8	59.5	56.8
O14672	ADAM10	Disintegrin and metalloproteinase domain-containing protein 10	Homo sapiens	High	16	598.4	608.9	591.9	614.2	552.1	571.9	596.8	613	580.5	637.7	624.4
Q13444	ADAM15	Disintegrin and metalloproteinase domain-containing protein 15	Homo sapiens	High	3	86.1	84.3	94.7	82.6	90	92.8	87.6	84.3	92.9	85.8	102.8
P78536	ADAM17	Disintegrin and metalloproteinase domain-containing protein 17	Homo sapiens	High	13	700.6	705.4	726.3	719.5	699.2	746.9	716.9	684	790.3	695.3	760.2
Q9P0K1	ADAM22	Disintegrin and metalloproteinase domain-containing protein 22	Homo sapiens	High	4	123.1	117.4	121.8	125.3	123.7	122.1	129.3	121.3	124.3	115.6	129.6
Q13443	ADAM9	Disintegrin and metalloproteinase domain-containing protein 9	Homo sapiens	High	7	91.8	78.5	85.9	83.4	80.1	67	91.8	91.4	92.2	75.5	93
P55265	ADAR	Double-stranded RNA-specific adenosine deaminase	Homo sapiens	High	62	6976.3	6975	7174	6766.9	6508.5	6527.7	6895.5	6805.5	7090.8	6562.4	6953.5
P78563	ADARB1	Double-stranded RNA-specific editase 1	Homo sapiens	High	5	61.7	55.4	58.4	58.9	61	61.3	64.4	62.4	62.2	60.8	65
Q7Z6V5	ADAT2	tRNA-specific adenosine deaminase 2	Homo sapiens	High	5	305.8	311.9	300.2	315.1	339.1	461.4	340.9	324.2	331.2	319.5	321.2
Q96EY9	ADAT3	Probable inactive tRNA-specific adenosine deaminase-like protein 3	Homo sapiens	High	3	88.7	84.4	82.5	90.2	121.2	101.5	83.5	83.7	88.8	78.7	79.9
Q86TW2	ADCK1	Uncharacterized aarF domain-containing protein kinase 1	Homo sapiens	High	2	96.4	97.5	94.1	107.7	62.2	57.1	56	54.7	70.9	86.5	93.5
Q3MIX3	ADCK5	Uncharacterized aarF domain-containing protein kinase 5	Homo sapiens	High	1	34.2	31.2	38.8	42	48.6	38.7	44.4	35.7	27.9	32.5	31.2
O60266	ADCY3	Adenylate cyclase type 3	Homo sapiens	High	5	114.1	109.7	112.5	126.3	111.3	123.3	113.7	121.3	110.1	119.7	135.6
O95622	ADCY5	Adenylate cyclase type 5	Homo sapiens	High	2	81.2	76.2	78.5	69.8	82.9	77.6	76.5	77.4	72.9	82.8	75.4
P35611	ADD1	Alpha-adducin	Homo sapiens	High	17	819	790	819.7	840.5	824.5	681.5	807.4	847.7	778.1	737	860.9
Q9UEY8	ADD3	Gamma-adducin	Homo sapiens	High	16	422.6	428.6	411.4	437.6	403.2	279.1	446.7	433.6	419.7	424.3	456.3
Q8N7X0	ADGB	Androglobin	Homo sapiens	Medium	1	38.3	20.7	25.7	30.5	22.3	45.1	19.4	22.1	28.5	20.5	31.8
P11766	ADH5	Alcohol dehydrogenase class-3	Homo sapiens	High	14	3132.7	3312.1	3400.7	3246.7	3170.9	3159	3407.9	3103	3407.1	3028.3	3401.7
Q9BV57	ADI1	1,2-dihydroxy-3-keto-5-methylthiopentene dioxygenase	Homo sapiens	High	7	543.8	507.5	469.4	436.1	457.3	370.7	379.1	368.3	437	465.2	480
P55263	ADK	Adenosine kinase	Homo sapiens	High	18	1766	1927.8	1798.8	1900.5	1952.6	1899.7	2032.2	1890.5	1901.5	1849.9	2006.9
Q9H2P0	ADNP	Activity-dependent neuroprotector homeobox protein	Homo sapiens	High	45	3749.8	3803	3937.4	3823.5	3716.6	3728.2	3865.5	3785.6	3935.8	3591.1	3804.7
Q6IQ32	ADNP2	ADNP homeobox protein 2	Homo sapiens	High	9	560.2	562.1	553.4	555.7	523.1	486.5	562.5	542.5	551.5	497.9	551.7
Q96SZ5	ADO	2-aminoethanethiol dioxygenase	Homo sapiens	High	9	547	546.4	496.8	477.1	541.3	516.8	496.3	508.4	505.7	502.9	493.2
Q9BRR6	ADPGK	ADP-dependent glucokinase	Homo sapiens	High	5	151.7	153.2	145.8	153.6	173.1	188	169.2	181.5	148.3	162.2	156.3
Q9NX46	ADPRHL2	Poly(ADP-ribose) glycohydrolase ARH3	Homo sapiens	High	16	1314	1271.9	1274.1	1261.4	1405.4	1323.5	1329.9	1290.1	1256.8	1223.2	1238.1
P18825	ADRA2C	Alpha-2C adrenergic receptor	Homo sapiens	High	2	64.3	78.4	68.1	56.3	88	76.7	74.3	66.7	64.9	89.2	76.6
Q16186	ADRM1	Proteasomal ubiquitin receptor ADRM1	Homo sapiens	High	12	1326.5	1335.6	1338.5	1314.1	1397.6	1367.6	1505.5	1408.7	1348.6	1251.7	1328
P30566	ADSL	Adenylosuccinate lyase	Homo sapiens	High	21	3125.2	3041.3	3067.4	2952.7	3038	3086	3091.5	2829.2	3034.7	2820.9	2983.2
P30520	ADSS	Adenylosuccinate synthetase isozyme 2	Homo sapiens	High	26	2271	2462.3	2343.6	2233	2341.2	2643.1	2343.5	2296.4	2421.2	2550.3	2323.7
Q8IUX7	AEBP1	Adipocyte enhancer-binding protein 1	Homo sapiens	High	8	178.5	156.2	161.6	165.8	169.8	178.2	173.9	173	142.4	156.5	145.5
Q6ZN18	AEBP2	Zinc finger protein AEBP2	Homo sapiens	High	5	234.1	269.5	238	240	250.5	228.6	241.3	239.2	254.5	278.5	264.5
Q08117	AES	Amino-terminal enhancer of split	Homo sapiens	High	1	32.3	30.1	36.7	33.8	29.8	28.8	26.6	26.2	27.8	40.5	37.2
P55196	AFDN	Afadin	Homo sapiens	High	21	494.3	502.7	507.2	510.2	510.3	487.6	498.6	555.6	506	460.5	535
P51825	AFF1	AF4/FMR2 family member 1	Homo sapiens	High	13	321.7	306.3	341.2	277.5	317.8	298.7	301.7	298.5	316.4	289.3	307.9
P51825-2	AFF1	Isoform 2 of AF4/FMR2 family member 1	Homo sapiens	Medium	4	100.1	92.9	96.6	86.7	113.3	91	93.8	105.4	96.7	92.8	99.8
P51816	AFF2	AF4/FMR2 family member 2	Homo sapiens	High	1	64.4	59.5	62.9	53.5	46	39.5	55.2	52.1	62.4	57.4	63.7
P51826	AFF3	AF4/FMR2 family member 3	Homo sapiens	High	2	126.4	120	101.8	111.2	93	107.3	109.1	92.8	98.1	109.3	109.3
Q9UHB7	AFF4	AF4/FMR2 family member 4	Homo sapiens	High	10	316.5	311.8	304.6	298.7	307.4	331.7	304.1	289.9	329.8	317.7	310.3
Q9Y4W6	AFG3L2	AFG3-like protein 2	Homo sapiens	High	41	3637.6	3579	3597.2	3525.4	3584.5	3611.9	3557.8	3429.1	3638.7	3409	3448.9
Q6ULP2	AFTPH	Aftiphilin	Homo sapiens	High	18	550.4	571.9	588	571.6	531.5	427.3	586.5	614.9	575.4	573.4	565
P20933	AGA	N(4)-(beta-N-acetylglucosaminyl)-L-asparaginase	Homo sapiens	High	3	236.7	220.1	222.3	243.1	242.9	278.4	222.9	208.5	214.7	217.3	229.9
Q99490	AGAP2	Arf-GAP with GTPase, ANK repeat and PH domain-containing protein 2	Homo sapiens	High	13	510.9	534.1	508.5	501.4	556.4	497.1	540.2	547.6	512.4	495.6	541.1
Q99490-2	AGAP2	Isoform 2 of Arf-GAP with GTPase, ANK repeat and PH domain-containing protein 2	Homo sapiens	High	4	53.3	47.7	58.1	68.1	61.3	69.6	44.6	61.7	45.4	38.7	53.3
P52594	AGFG1	Arf-GAP domain and FG repeat-containing protein 1	Homo sapiens	High	10	847	872.6	872	850.5	862.8	908.8	921	923.3	914.9	865.5	848.9
O95081	AGFG2	Arf-GAP domain and FG repeat-containing protein 2	Homo sapiens	High	1	14	11.8	14.3	12.9	18.5	13.4	17.1	14.4	14.8	13	14.1
Q8N302	AGGF1	Angiogenic factor with G patch and FHA domains 1	Homo sapiens	High	4	134.7	119.5	120.7	118.4	102.5	144.8	116.3	109.8	118.7	120.4	123.9
Q53H12	AGK	Acylglycerol kinase, mitochondrial	Homo sapiens	High	21	2101.2	2028.7	2064.3	2141.3	2222.2	2511.4	2081.1	2072.9	2113.8	2103.1	2006.2
P35573	AGL	Glycogen debranching enzyme	Homo sapiens	High	71	5454.9	5429.5	5243.7	5552.9	5293.8	5704.4	5148.6	5352.3	5269.9	5192.9	5346.5
Q9BSE5	AGMAT	Agmatinase, mitochondrial	Homo sapiens	High	4	123.9	116.3	124.9	120.5	156.3	117.8	116.1	122	111.8	109	108.3
Q9UL18	AGO1	Protein argonaute-1	Homo sapiens	High	11	377.6	347.3	371.7	382.6	343.9	388.4	367.4	392.9	324.9	382.1	402.3
Q9UKV8	AGO2	Protein argonaute-2	Homo sapiens	High	21	1414	1467.2	1475.3	1431.9	1557.6	1506.1	1498.7	1550.7	1448.4	1436.4	1462.5
Q9H9G7	AGO3	Protein argonaute-3	Homo sapiens	High	3	100	90.5	88.2	87.5	111.9	104.6	99.2	90.9	79.5	88.2	93.8
Q99943	AGPAT1	1-acyl-sn-glycerol-3-phosphate acyltransferase alpha	Homo sapiens	High	5	298	265.7	266.6	308.6	309.1	325.3	280.7	284.8	268.6	293.6	306.9
O15120	AGPAT2	1-acyl-sn-glycerol-3-phosphate acyltransferase beta	Homo sapiens	High	4	84.9	85	86.5	98.9	95.6	102.2	100.3	105.7	90.8	107.8	105.4
Q9NRZ7	AGPAT3	1-acyl-sn-glycerol-3-phosphate acyltransferase gamma	Homo sapiens	High	9	474.1	478.4	484.7	604.3	516	600.8	472.3	540.3	489.2	494.4	560.7
Q9NUQ2	AGPAT5	1-acyl-sn-glycerol-3-phosphate acyltransferase epsilon	Homo sapiens	High	15	1055.6	1068.1	1132.3	1123.2	1326.4	1397.4	1095.9	1034.2	1092.9	1098.3	1062.5
O00116	AGPS	Alkyldihydroxyacetonephosphate synthase, peroxisomal	Homo sapiens	High	33	3775.3	3766.5	3817.1	3858.4	4055.8	4461.1	4019.1	4035.1	3891.1	3845.7	3868.9
Q9UPW5	AGTPBP1	Cytosolic carboxypeptidase 1	Homo sapiens	High	5	97.5	93.1	93.1	96	91.5	77.3	91.4	93	93.3	90.4	101.8
Q8WYP5	AHCTF1	Protein ELYS	Homo sapiens	High	77	4138.1	4063.1	4101.6	4029.5	3793.9	3695.2	4025	4057.5	4075.7	4023.8	4006.8
P23526	AHCY	Adenosylhomocysteinase	Homo sapiens	High	25	6441.4	6376.9	6288.5	6247.4	6509.6	6866.1	6257.6	6068.1	6365	6557.2	6373.3
O43865	AHCYL1	Adenosylhomocysteinase 2	Homo sapiens	High	17	3540.9	3805.1	3685.6	3573	3352.1	3562	3347.4	3044.8	3665.6	3605.5	3557.2
Q96HN2	AHCYL2	Adenosylhomocysteinase 3	Homo sapiens	High	5	107.1	135.1	137.1	135.6	145.5	150.6	154.4	145	131.8	125.8	133
Q5TGY3	AHDC1	AT-hook DNA-binding motif-containing protein 1	Homo sapiens	High	4	103.5	98.3	100.4	92.3	71.6	49.9	84.5	92.4	95.5	89.3	102.9
Q09666	AHNAK	Neuroblast differentiation-associated protein AHNAK	Homo sapiens	High	4	45.1	44.1	48.4	39.5	52.3	50.4	44.1	34.8	41.7	52.5	47.1
O95433	AHSA1	Activator of 90 kDa heat shock protein ATPase homolog 1	Homo sapiens	High	26	3919.1	3851	3904.6	3888.3	3732.1	4293.6	3659.5	3700.7	3931.9	4060	3806.3
P02765	AHSG	Alpha-2-HS-glycoprotein	Homo sapiens	High	3	323.1	270.5	267.4	245.8	272.7	340.5	293.6	249.8	319.6	271.2	287.1
Q96BJ3	AIDA	Axin interactor, dorsalization-associated protein	Homo sapiens	High	10	435.6	445.3	452.5	433.4	385	365.4	421	403.6	455.3	400.2	466.3
O95831	AIFM1	Apoptosis-inducing factor 1, mitochondrial	Homo sapiens	High	26	3043.4	3030	3062.9	2941.6	3003.6	3101.9	3014.5	3021.8	3056.8	3035.3	2914
Q9NVV5	AIG1	Androgen-induced gene 1 protein	Homo sapiens	Medium	1	16.7	19.5	18.8	22.1	30.1	14.4	26.7	19.2	20.7	20.5	18.3
Q9Y4K1	AIM1	Absent in melanoma 1 protein	Homo sapiens	High	46	3227.7	3108.9	3174.7	3051.1	2992.5	3154.8	3173.1	3216.4	3090.1	3114.7	3282
Q12904	AIMP1	Aminoacyl tRNA synthase complex-interacting multifunctional protein 1	Homo sapiens	High	22	2996	2984.6	3092.3	2944	2819.5	3057.3	2906.3	2759	3076.8	2845.1	3016.3
Q13155	AIMP2	Aminoacyl tRNA synthase complex-interacting multifunctional protein 2	Homo sapiens	High	15	828.6	812.6	850.8	845.8	917.2	792.1	853.4	778	859.4	817.5	842.2
F8W950	AIMP2	Aminoacyl tRNA synthase complex-interacting multifunctional protein 2	Homo sapiens	Medium	7	626.5	689.2	678.2	674.6	880.9	665.4	654.1	637.9	689.1	652	696.4
O00170	AIP	AH receptor-interacting protein	Homo sapiens	High	18	2213.5	2254	2259.1	2061.4	2084.3	1933.7	2043.3	1913.6	2273.6	2101.8	2121.4
H0YJL9	AJUBA	LIM domain-containing protein ajuba (Fragment)	Homo sapiens	Medium	2	69.3	74	57.1	63	64.4	81.4	67.2	68.3	68.4	59.8	59.8
P00568	AK1	Adenylate kinase isoenzyme 1	Homo sapiens	High	1	62.1	68.1	55.7	54.5	77.3	81.5	55	63.1	50.8	79.5	90.3
P54819	AK2	Adenylate kinase 2, mitochondrial	Homo sapiens	High	15	2775.5	2639.7	2606.7	2354.4	2253.4	1753.8	2100.7	1979.4	2462	2384.1	2422.4
Q9UIJ7	AK3	GTP:AMP phosphotransferase AK3, mitochondrial	Homo sapiens	High	13	1014.1	1049.1	983.6	887.7	934.2	894.3	856.3	874.9	1039	1000.4	924.7
P27144	AK4	Adenylate kinase 4, mitochondrial	Homo sapiens	High	5	361.5	333	353.6	313.6	298.5	251.3	306	260.2	353.9	274.8	323.5
Q9Y3D8	AK6	Adenylate kinase isoenzyme 6	Homo sapiens	High	5	238.5	225.7	236.2	214.8	226	250.9	197.7	188.9	204	207	208.2
Q92667	AKAP1	A-kinase anchor protein 1, mitochondrial	Homo sapiens	High	20	1030.7	1085.8	1066.2	1007.9	1105.3	1074.2	1026.3	1112.8	1110.8	1078.6	1071.7
O43572	AKAP10	A-kinase anchor protein 10, mitochondrial	Homo sapiens	High	9	336.4	340.3	321.2	336.9	335.9	367.2	354.9	361.2	345.9	327.2	314.7
Q9UKA4	AKAP11	A-kinase anchor protein 11	Homo sapiens	High	26	954.2	998.7	975.1	1006.4	930.7	888.2	957.3	1030.1	984	1005.7	1047.2
Q12802	AKAP13	A-kinase anchor protein 13	Homo sapiens	High	6	184.8	191.1	189.4	201	203.6	202	213.6	228.9	227.8	204	210.5
Q02040	AKAP17A	A-kinase anchor protein 17A	Homo sapiens	High	11	670.9	714.5	702.6	770.8	751.9	819.8	749.3	749.3	756.1	676.3	745.1
Q9Y2D5	AKAP2	A-kinase anchor protein 2	Homo sapiens	High	28	1444.2	1507.1	1486.5	1376.1	894.7	516	1223.8	1261.5	1382.5	1295.9	1382.8
O43823	AKAP8	A-kinase anchor protein 8	Homo sapiens	High	19	1106.6	1150.6	1121.6	1089.2	1108.8	1268.2	1152	1207	1126.6	1142.6	1082.6
Q9ULX6	AKAP8L	A-kinase anchor protein 8-like	Homo sapiens	High	15	1047.2	1058.8	1058.5	1137.2	1043.2	1032.1	1066.8	1112.9	1051.4	1012.2	990.6
Q99996	AKAP9	A-kinase anchor protein 9	Homo sapiens	High	54	1998.6	2015	2034.1	1995.9	2146.5	1623	2112.1	2166.2	1983.5	1964.3	2037.8
Q53H80	AKIRIN2	Akirin-2	Homo sapiens	High	3	155.8	149.9	149.6	123.9	184.2	99.8	127	123.9	132.5	107.7	134
Q7Z591	AKNA	AT-hook-containing transcription factor	Homo sapiens	High	16	707.6	720.2	703.7	668.4	554.5	446.6	734.9	744.1	712.5	731.5	711
P14550	AKR1A1	Alcohol dehydrogenase [NADP(+)]	Homo sapiens	High	20	1853.4	1865.5	1808	1848.6	1804.4	1538.6	1670.9	1606.6	1858.8	1775.4	1825
P15121	AKR1B1	Aldose reductase	Homo sapiens	High	17	1273.4	1442.2	1359.5	1256.4	1419.1	1100.3	1336.6	1256.7	1513.4	1154.9	1349.4
Q04828	AKR1C1	Aldo-keto reductase family 1 member C1	Homo sapiens	High	1	26.7	35.2	29.4	25.1	27.1	23.2	19.1	20.4	27.9	17	22.7
P42330	AKR1C3	Aldo-keto reductase family 1 member C3	Homo sapiens	High	10	1567.1	1654.4	1611.1	1381.7	1593.8	1143.6	1336.3	1216.4	1436.9	1489.7	1386.1
O43488	AKR7A2	Aflatoxin B1 aldehyde reductase member 2	Homo sapiens	High	13	1274.9	1291.6	1224.3	1250.4	1148.4	1121.5	1123.4	1132	1301.5	1157.4	1173.9
P31749	AKT1	RAC-alpha serine/threonine-protein kinase	Homo sapiens	High	16	1421.3	1447.9	1391.5	1514.7	1313.2	1284.2	1373	1419.3	1489.2	1420.1	1508.9
Q96B36	AKT1S1	Proline-rich AKT1 substrate 1	Homo sapiens	High	3	93.1	93.6	98.1	98	178.9	92	102.5	86.9	80.7	86.8	98.2
P31751	AKT2	RAC-beta serine/threonine-protein kinase	Homo sapiens	High	10	394	409.7	420.2	401	423.8	392.6	408.6	463.6	410.2	428.1	444.4
Q9H8T0	AKTIP	AKT-interacting protein	Homo sapiens	High	1	26.9	29	27.7	29.2	34.7	27.1	30.4	24.6	27.7	28.4	27.4
P13716	ALAD	Delta-aminolevulinic acid dehydratase	Homo sapiens	High	8	446.4	431.3	441.1	478.4	466.4	394.2	458.2	419.8	437.1	435.9	464.5
P13196	ALAS1	5-aminolevulinate synthase, nonspecific, mitochondrial	Homo sapiens	High	11	592.6	617.4	632.4	633.3	471.6	367.1	625.1	684.4	629	587.8	665.5
Q13740-2	ALCAM	Isoform 2 of CD166 antigen	Homo sapiens	Medium	2	279.4	295.6	260.6	253.6	182.5	242	233.2	218.4	275.9	241.8	257.3
Q13740	ALCAM	CD166 antigen	Homo sapiens	High	14	1114.4	1169.8	1094.1	1133	798	1007.3	929	1041.4	1109.9	1002.2	1087.1
Q8IZ83	ALDH16A1	Aldehyde dehydrogenase family 16 member A1	Homo sapiens	High	18	933.3	972.1	922.7	925	1023	933.8	952.2	938.4	902.1	867.7	914.2
P54886	ALDH18A1	Delta-1-pyrroline-5-carboxylate synthase	Homo sapiens	High	42	4298.3	4387.9	4230.5	4184.5	4418.7	4323.5	4300.9	4508	4322.9	4490.3	4163.1
O94788	ALDH1A2	Retinal dehydrogenase 2	Homo sapiens	High	10	448.6	448.7	425.6	406	371.6	285.6	398.5	368.5	429.3	453.4	449.4
P30837	ALDH1B1	Aldehyde dehydrogenase X, mitochondrial	Homo sapiens	High	21	1501.6	1404.8	1515.7	1457.8	1607.8	1564.8	1516	1423.2	1472.2	1405.2	1406.2
P30038	ALDH4A1	Delta-1-pyrroline-5-carboxylate dehydrogenase, mitochondrial	Homo sapiens	High	16	716.4	723.8	702.4	717.1	724.4	775.1	719.7	692.9	711.4	700.8	702
P51649	ALDH5A1	Succinate-semialdehyde dehydrogenase, mitochondrial	Homo sapiens	High	16	1200.3	1149.1	1218.6	1182.8	1265.5	1164.1	1197.4	1114.2	1179.1	1110.4	1182
Q02252	ALDH6A1	Methylmalonate-semialdehyde dehydrogenase [acylating], mitochondrial	Homo sapiens	High	23	1383	1448.3	1409.4	1511.1	1448.3	1439.8	1506.5	1514.4	1509.1	1517.6	1415.8
P49189	ALDH9A1	4-trimethylaminobutyraldehyde dehydrogenase	Homo sapiens	High	21	2241.2	2438.7	2264.3	2283.8	2329.2	2128.6	2402.3	2302.6	2337	2191.8	2156.9
P04075	ALDOA	Fructose-bisphosphate aldolase A	Homo sapiens	High	28	10765.1	11067.7	11115.6	10585.9	9829.2	9219.1	11066.1	10686.6	11395.9	10154.2	10906.6
P09972	ALDOC	Fructose-bisphosphate aldolase C	Homo sapiens	High	23	2980.5	2847.2	2930.7	2932.1	2418.7	1935.4	2764.8	2697	3190.8	2517.7	2835.3
Q9BT22	ALG1	Chitobiosyldiphosphodolichol beta-mannosyltransferase	Homo sapiens	High	10	922.4	922.3	929.3	1034	1027.5	1287.5	1032.4	1069.6	982.8	1040.6	977.6
Q5BKT4	ALG10	Dol-P-Glc:Glc(2)Man(9)GlcNAc(2)-PP-Dol alpha-1,2-glucosyltransferase	Homo sapiens	High	4	143.3	167.9	147.8	181.8	160	213.6	139.7	173.9	161.3	211.9	161.2
Q2TAA5	ALG11	GDP-Man:Man(3)GlcNAc(2)-PP-Dol alpha-1,2-mannosyltransferase	Homo sapiens	High	3	194.4	164.9	190.1	221.8	187.4	213.2	190	179	171.2	164.8	201.4
Q9NP73	ALG13	Putative bifunctional UDP-N-acetylglucosamine transferase and deubiquitinase ALG13	Homo sapiens	High	4	209.8	202.6	205.7	196	271.9	267.6	230.3	205.7	228.6	204	217.9
Q96F25	ALG14	UDP-N-acetylglucosamine transferase subunit ALG14 homolog	Homo sapiens	High	2	56.3	55.6	48.9	57.2	64.8	68.8	55.5	60	47.7	49.8	58.8
Q9H553	ALG2	Alpha-1,3/1,6-mannosyltransferase ALG2	Homo sapiens	High	8	351.8	338.8	355.7	365.8	421	427.7	366.6	369.3	348.2	350.8	355.6
Q92685	ALG3	Dol-P-Man:Man(5)GlcNAc(2)-PP-Dol alpha-1,3-mannosyltransferase	Homo sapiens	High	3	80.5	50	77.3	154.5	98.1	196.7	81.2	116.8	73.9	187.1	84.6
Q9Y673	ALG5	Dolichyl-phosphate beta-glucosyltransferase	Homo sapiens	High	11	998.7	1035	1005.2	1088.2	1204.2	1439.9	1094.3	1137	1067	1188.3	1038.5
Q9Y672	ALG6	Dolichyl pyrophosphate Man9GlcNAc2 alpha-1,3-glucosyltransferase	Homo sapiens	High	3	157.1	145.3	154.3	273.9	250.4	357.1	180.1	261.6	169.3	299.8	229.4
Q9BVK2	ALG8	Probable dolichyl pyrophosphate Glc1Man9GlcNAc2 alpha-1,3-glucosyltransferase	Homo sapiens	High	6	379.4	404.7	391.7	502.1	498.3	583.7	421.7	511.6	411.2	561.1	485.8
Q9H6U8	ALG9	Alpha-1,2-mannosyltransferase ALG9	Homo sapiens	High	7	376.5	378.6	373.7	421.3	428.4	506.4	410.8	440.2	402.8	438.2	421.8
Q13686	ALKBH1	DNA demethylase ALKBH1	Homo sapiens	High	10	265	286.3	264.2	267.7	255.8	287.2	256.6	301.2	287.6	326.9	272.2
Q6NS38	ALKBH2	DNA oxidative demethylase ALKBH2	Homo sapiens	High	4	173.8	191.2	192	182.7	170.4	175.2	172.1	174.4	178	170.1	200.9
Q96Q83	ALKBH3	Alpha-ketoglutarate-dependent dioxygenase alkB homolog 3	Homo sapiens	High	8	302.7	283.6	307.2	307.8	313	329.3	310.3	341.2	326.1	299.4	326.9
Q9NXW9	ALKBH4	Alpha-ketoglutarate-dependent dioxygenase alkB homolog 4	Homo sapiens	High	10	236.6	247.2	250.9	249.1	277.3	262	259.8	267.7	249.6	231.4	249.6
Q6P6C2-3	ALKBH5	Isoform 3 of RNA demethylase ALKBH5	Homo sapiens	Medium	3	117.4	106.6	113.3	113.6	95.7	100.4	117.1	122.1	120.8	99.3	111.3
Q6P6C2	ALKBH5	RNA demethylase ALKBH5	Homo sapiens	High	18	716.4	722.3	737.5	727	764.2	689	749.5	745.1	803.2	712.6	705.9
Q9BT30	ALKBH7	Alpha-ketoglutarate-dependent dioxygenase alkB homolog 7, mitochondrial	Homo sapiens	High	5	155.7	156.8	168.5	150.7	196.9	153.9	175.3	165.9	165.3	161.9	158.2
Q96BT7	ALKBH8	Alkylated DNA repair protein alkB homolog 8	Homo sapiens	High	10	302.4	321.2	313.9	307.8	328.4	373.7	316.3	342.4	313.3	301.7	329.3
Q8TCU4	ALMS1	Alstrom syndrome protein 1	Homo sapiens	High	21	743.3	744.7	723.7	730.1	631.7	672.1	723.9	734.2	730.5	749.7	754.3
P20292	ALOX5AP	Arachidonate 5-lipoxygenase-activating protein	Homo sapiens	High	3	301.3	275.9	261.6	297	337.9	290.3	276.8	260	287.1	299.7	316
Q96QP1	ALPK1	Alpha-protein kinase 1	Homo sapiens	High	4	154.9	150.4	148.8	131.5	146.8	136.8	155.7	137	141.1	109.5	143.5
Q96Q42	ALS2	Alsin	Homo sapiens	High	7	248.7	243.5	269	246.9	276.6	270.3	233.7	240.1	248.5	242.5	253.6
Q86V81	ALYREF	THO complex subunit 4	Homo sapiens	High	10	2332	2356.1	2374.8	2482.4	2013.7	2193.8	2236.5	2264.9	2394.6	2758.4	2469.6
Q9UHK6	AMACR	Alpha-methylacyl-CoA racemase	Homo sapiens	High	1	59.6	64.6	72	54.7	79.3	80.5	64	65.3	60.5	60.3	64.4
Q9C0C7	AMBRA1	Activating molecule in BECN1-regulated autophagy protein 1	Homo sapiens	High	19	457.6	448.2	446.7	453	499.8	489.4	450.9	471.8	432.9	442	456.6
P17707	AMD1	S-adenosylmethionine decarboxylase proenzyme	Homo sapiens	High	3	173.4	192	180.1	193.6	162	182.7	160.5	154.4	171	206	183.9
Q9Y303	AMDHD2	N-acetylglucosamine-6-phosphate deacetylase	Homo sapiens	High	7	187.3	173.8	182.2	177.1	203.5	176.3	163.7	181.2	179.7	175.4	172.5
Q9UKV5	AMFR	E3 ubiquitin-protein ligase AMFR	Homo sapiens	High	16	243	234.9	242.2	241.9	241.1	169.3	244.1	243	229.5	255.4	254.4
Q9Y4X0	AMMECR1	AMME syndrome candidate gene 1 protein	Homo sapiens	High	4	215.6	208.7	213.8	219.7	200.5	240.2	201.4	203.6	197.2	204.5	227.8
Q8IY45	AMN1	Protein AMN1 homolog	Homo sapiens	Medium	1	23.6	27.3	17.1	20.7	28.2	18.3	21.1	22.4	24.9	20.7	23.4
Q01433	AMPD2	AMP deaminase 2	Homo sapiens	High	28	2444.3	2366.2	2440.3	2456	2561.7	2452.3	2387.1	2402.2	2303.5	2163.1	2335.9
Q86W34	AMZ2	Archaemetzincin-2	Homo sapiens	High	5	194.5	185.4	186.2	210.8	176.2	192.9	189	191.8	182.9	188.6	207.8
Q9H1A4	ANAPC1	Anaphase-promoting complex subunit 1	Homo sapiens	High	45	2064.9	2013.2	2053.3	2146.7	2530.4	2061.4	2244.3	2335.6	1990	2072.2	2192.6
Q9UM13	ANAPC10	Anaphase-promoting complex subunit 10	Homo sapiens	High	5	97.1	107.7	98.1	105.6	115.6	114.4	111.2	107.2	107.6	99.9	112.4
Q96DE5	ANAPC16	Anaphase-promoting complex subunit 16	Homo sapiens	High	3	91.8	85.9	98.3	106	68	105	91.5	117.3	90	107.6	121
Q9UJX6	ANAPC2	Anaphase-promoting complex subunit 2	Homo sapiens	High	17	697.5	679.9	652.4	764.7	848.1	808.8	779.1	811.5	683.1	744.3	728
Q9UJX5	ANAPC4	Anaphase-promoting complex subunit 4	Homo sapiens	High	12	857.4	789.9	829	874	839.3	822.4	803.2	865.9	791.7	829.1	892.5
Q9UJX4	ANAPC5	Anaphase-promoting complex subunit 5	Homo sapiens	High	17	734.5	746.7	702.2	747.5	872.6	663.6	810.2	800.2	732.1	735	826.5
Q9UJX3	ANAPC7	Anaphase-promoting complex subunit 7	Homo sapiens	High	24	2158.5	2227	2179.8	2089	2500.9	2158.4	2257.9	2339.6	2165.6	2191.1	2148.6
Q9UNK9	ANGEL1	Protein angel homolog 1	Homo sapiens	High	2	63.3	59.5	65.8	71.3	70.7	73.7	66.2	55.3	60.4	65.9	72.1
Q5VTE6	ANGEL2	Protein angel homolog 2	Homo sapiens	High	4	204.8	211.2	207.2	191.4	174	192.6	187.7	205.8	185.6	191.8	215.3
Q9Y5C1	ANGPTL3	Angiopoietin-related protein 3	Homo sapiens	High	1	101.8	86.2	97.5	113	116.6	100.4	100.1	90.3	95	103.7	95.6
Q01484	ANK2	Ankyrin-2	Homo sapiens	High	5	159.9	179.9	166	177.6	142.7	165.1	163.4	164.3	157.4	211.7	172.5
Q9P2R3	ANKFY1	Rabankyrin-5	Homo sapiens	High	36	2117	2045.3	2060.8	2141.8	2290.1	2125.9	2168.2	2243.1	2035.8	2073.8	2140.2
Q9HCJ1	ANKH	Progressive ankylosis protein homolog	Homo sapiens	High	4	153.3	127.3	133.7	177.5	160.7	173.3	150.3	146.5	139	154.2	163.8
E9PDP5	ANKHD1	Ankyrin repeat and KH domain-containing protein 1 (Fragment)	Homo sapiens	Medium	3	233	238.9	233.3	226.6	211.6	169.2	211.2	216.9	203.3	204.7	215
Q8IWZ3	ANKHD1	Ankyrin repeat and KH domain-containing protein 1	Homo sapiens	High	34	1226.4	1207.2	1242.6	1207.3	1173.4	896.3	1243.5	1310.9	1173	1182.7	1236.5
D6RHC4	ANKHD1	Ankyrin repeat and KH domain-containing protein 1 (Fragment)	Homo sapiens	Medium	1	21.8	20.4	22.6	24.7	28.6	23.5	24.5	28.8	18.6	18.4	18.9
Q9P2G1	ANKIB1	Ankyrin repeat and IBR domain-containing protein 1	Homo sapiens	Medium	2	198.1	199.9	184.8	140.6	128.9	158.4	160	149.2	142.5	206.8	172.7
Q86XL3	ANKLE2	Ankyrin repeat and LEM domain-containing protein 2	Homo sapiens	High	33	1266.2	1311	1310.4	1272.3	1331.4	1050.9	1386	1404.8	1337.1	1255	1279.6
Q8IV38	ANKMY2	Ankyrin repeat and MYND domain-containing protein 2	Homo sapiens	High	19	967.4	955.9	1033.3	1010.7	776.8	441.5	962.2	946.5	1002.4	947.1	1060.2
Q9NXR5	ANKRD10	Ankyrin repeat domain-containing protein 10	Homo sapiens	High	2	13.2	11.3	11.5	13.6	11	14.3	9.7	10.6	10.3	10.8	9.2
Q6UB99	ANKRD11	Ankyrin repeat domain-containing protein 11	Homo sapiens	High	15	739.9	743.4	765.9	705.4	606.1	646.5	719.6	693.1	720.7	694.6	763.8
Q6UB98	ANKRD12	Ankyrin repeat domain-containing protein 12	Homo sapiens	High	2	70.7	83.6	83.7	80.1	54.3	63	81.6	80.4	78.5	79.5	77.4
Q8IZ07	ANKRD13A	Ankyrin repeat domain-containing protein 13A	Homo sapiens	High	13	647.3	616.9	619.3	707.9	689.4	701.1	642.7	652.3	612.3	665	630.5
Q6ZTN6-3	ANKRD13D	Isoform 3 of Ankyrin repeat domain-containing protein 13D	Homo sapiens	Medium	2	56.1	55.3	54.7	64.3	64.3	58.1	51.3	48.5	51.7	48.7	53.6
O75179	ANKRD17	Ankyrin repeat domain-containing protein 17	Homo sapiens	High	41	2613.7	2814.5	2637	2620.9	2942.4	2693.1	2933	3050.1	2707.7	2613.9	2702.9
Q96NW4	ANKRD27	Ankyrin repeat domain-containing protein 27	Homo sapiens	High	11	348.9	349.9	332.5	357.4	339.3	328	347.1	337.5	372.1	378.5	355.1
O15084	ANKRD28	Serine/threonine-protein phosphatase 6 regulatory ankyrin repeat subunit A	Homo sapiens	High	20	1003.8	1056.4	1083.3	1098.3	1317.3	1125.7	1223	1220	1049.5	1011.6	1124.2
Q8N7Z5	ANKRD31	Putative ankyrin repeat domain-containing protein 31	Homo sapiens	Medium	1	84.8	100.8	108.1	124	99.6	105.4	79.9	105.4	76.3	116.4	121.3
Q5JPF3	ANKRD36C	Ankyrin repeat domain-containing protein 36C	Homo sapiens	High	2	51.5	45.4	47.8	47.4	46	47.7	43.5	38.8	46.2	37.2	44.8
Q53RE8	ANKRD39	Ankyrin repeat domain-containing protein 39	Homo sapiens	High	5	213.4	196.1	184	222.1	272.6	250.8	194.7	231.8	194.9	286	203
Q6AI12	ANKRD40	Ankyrin repeat domain-containing protein 40	Homo sapiens	High	3	71.9	64.2	56.9	60.6	55.6	58	56.2	56	58.8	56.3	63.5
Q86W74	ANKRD46	Ankyrin repeat domain-containing protein 46	Homo sapiens	High	4	207.6	223.7	216.3	198.8	210.4	136.7	211.3	213.9	226.6	177.3	208.2
Q8WVL7	ANKRD49	Ankyrin repeat domain-containing protein 49	Homo sapiens	High	1	41.1	46.1	40.1	39.8	60.4	49.5	42.5	37	42	40.5	43.5
Q9ULJ7	ANKRD50	Ankyrin repeat domain-containing protein 50	Homo sapiens	High	21	747.3	785.6	742.6	741.5	744.7	764.4	771.2	802.3	793.2	768.4	781.1
Q8NB46	ANKRD52	Serine/threonine-protein phosphatase 6 regulatory ankyrin repeat subunit C	Homo sapiens	High	15	467	465.3	430.1	446.3	538.9	456.4	498.7	500	498.8	475	443
Q6NXT1	ANKRD54	Ankyrin repeat domain-containing protein 54	Homo sapiens	High	1	24.2	24.9	23.8	21.9	20	22.8	23.3	29.7	23.1	21.5	22.2
Q96BM1	ANKRD9	Ankyrin repeat domain-containing protein 9	Homo sapiens	Medium	1	26.7	25.9	33.5	18.7	23.2	13.1	21.5	27.6	26.7	12.4	26.1
Q92625	ANKS1A	Ankyrin repeat and SAM domain-containing protein 1A	Homo sapiens	High	19	706.7	698.4	719.7	713.6	825	763.7	795.4	753.6	648.3	725.3	694.1
Q9H8Y5	ANKZF1	Ankyrin repeat and zinc finger domain-containing protein 1	Homo sapiens	High	24	1675.4	1579.6	1691.8	1695.3	1592.5	1343.8	1636	1623.1	1634.4	1346.3	1592.3
Q9NQW6	ANLN	Anillin	Homo sapiens	High	25	957.6	976.4	972.6	955.7	1405.7	1529.2	1060.1	1097.4	911.1	901.1	921.2
Q9NW15	ANO10	Anoctamin-10	Homo sapiens	High	1	25.2	30.7	20.1	29.6	34.4	49.5	41.1	40.8	30.7	36.5	45
Q4KMQ2	ANO6	Anoctamin-6	Homo sapiens	High	16	802	822.3	802	850.9	753.4	823.8	774.9	896.6	776.4	860.9	851.6
P39687	ANP32A	Acidic leucine-rich nuclear phosphoprotein 32 family member A	Homo sapiens	High	13	2066.8	2113.3	2136.5	1998	1629.6	2128.3	2091.8	2157	2254	2235.3	2074.4
Q92688	ANP32B	Acidic leucine-rich nuclear phosphoprotein 32 family member B	Homo sapiens	High	6	2542.8	2627.9	2608.5	2543.3	2251.7	2362.4	2440.8	2432.9	2566.3	2024.6	2550.1
Q9BTT0	ANP32E	Acidic leucine-rich nuclear phosphoprotein 32 family member E	Homo sapiens	High	9	1024.4	996.5	1093.5	1169.1	859.7	1090.3	1096.4	1216.7	1095.8	1270.3	1079.8
P58335	ANTXR2	Anthrax toxin receptor 2	Homo sapiens	High	8	371.1	376.3	378.6	401.2	408.4	438.5	399.5	425.8	373.2	415.9	425.4
P04083	ANXA1	Annexin A1	Homo sapiens	High	28	4127.9	4204.4	4188.1	3525.4	3764.2	3268.5	3697.2	3459	4038	3961.9	3765.9
P50995	ANXA11	Annexin A11	Homo sapiens	High	20	2523.1	2397.7	2423.4	2280.4	2465.3	1929.7	2353.4	2104	2253.7	2167.1	2360.6
P07355	ANXA2	Annexin A2	Homo sapiens	High	35	5860.2	5498	5777.8	5446.6	5340.8	4726.6	5171.3	4558.5	5270.9	5167.2	5513.8
P12429	ANXA3	Annexin A3	Homo sapiens	High	19	1160.2	1092.7	1196	1175.9	1210.9	1105.1	1133.1	1026.8	1039	1005.3	1149.1
P09525	ANXA4	Annexin A4	Homo sapiens	High	18	943.1	906.7	938	988.7	1004.8	844.3	937.1	846	908	952.5	969.3
E5RK69	ANXA6	Annexin	Homo sapiens	High	11	46.4	42.7	47.9	51.6	34.7	53.5	42.7	53.7	41.7	35.9	47.6
P08133	ANXA6	Annexin A6	Homo sapiens	High	57	9338.6	9342.4	9128.1	8948.1	8718.7	8520.2	9095	8515.5	9042.4	8724.4	8852.8
P20073	ANXA7	Annexin A7	Homo sapiens	High	21	2863.4	3008.5	2837.4	2620.9	3265.2	2526.5	2798.7	2643.5	2892.9	2865.9	2715.1
Q63HQ0	AP1AR	AP-1 complex-associated regulatory protein	Homo sapiens	High	2	70.6	78	75.5	75.9	73	74.1	74.8	67.7	78.6	73.9	76
Q10567	AP1B1	AP-1 complex subunit beta-1	Homo sapiens	High	23	1566.9	1650.8	1604	1625.6	1822.4	1609.1	1756	1792.5	1575.1	1654.2	1610
Q10567-3	AP1B1	Isoform C of AP-1 complex subunit beta-1	Homo sapiens	High	6	543.5	556.1	529.3	529.2	664.4	543.7	579.8	615.7	540.4	544.2	587.1
O43747	AP1G1	AP-1 complex subunit gamma-1	Homo sapiens	High	27	1731.4	1793.8	1764.3	1894.9	2139.1	1873.2	1941.4	2088	1750.7	1987.2	1807.1
O75843	AP1G2	AP-1 complex subunit gamma-like 2	Homo sapiens	High	22	990	1009	966.5	1047.6	1119	1192.9	1052.8	1085.8	1016.7	1098.2	1003.1
Q9BXS5	AP1M1	AP-1 complex subunit mu-1	Homo sapiens	High	21	1468.6	1447.2	1496.1	1576.2	1469.3	1597.2	1375.2	1478.4	1435.8	1554.8	1590.2
P61966	AP1S1	AP-1 complex subunit sigma-1A	Homo sapiens	High	4	285.6	264.4	262.9	261.5	270.5	258.4	227.8	224.3	260.7	305.7	268.7
P56377	AP1S2	AP-1 complex subunit sigma-2	Homo sapiens	High	3	107.5	102.3	104.3	99.3	93.9	98.9	98.9	83	98	105.3	97.3
O95782	AP2A1	AP-2 complex subunit alpha-1	Homo sapiens	High	28	3112.9	3078.4	3083.4	3110.8	3565	2778.6	3415.3	3449.5	3103.4	3008.7	3194.4
O94973	AP2A2	AP-2 complex subunit alpha-2	Homo sapiens	High	23	1548.1	1568.8	1568.2	1629.8	1814	1648.6	1684.9	1719	1585.8	1582.7	1621.6
P63010	AP2B1	AP-2 complex subunit beta	Homo sapiens	High	25	3594	3701.9	3577.2	3761	4246.7	3447.3	3916.1	4013.9	3601.6	3519.6	3687.3
Q96CW1	AP2M1	AP-2 complex subunit mu	Homo sapiens	High	20	1727	1794.7	1792.7	1823.3	1880.8	1817.1	1853.6	1779.9	1860.8	1857.4	1860.3
P53680	AP2S1	AP-2 complex subunit sigma	Homo sapiens	High	5	642.2	564.1	573.8	583.3	617.2	564.6	502.2	502.8	593.1	566.2	664.6
O00203	AP3B1	AP-3 complex subunit beta-1	Homo sapiens	High	43	4508.5	4627.2	4398.9	4427.9	4448.4	4442.5	4481.7	4527.3	4380.6	4526.5	4312.9
O14617-5	AP3D1	Isoform 5 of AP-3 complex subunit delta-1	Homo sapiens	High	8	155.2	160.5	161.5	158.1	119.7	154.9	156.4	152.8	162.4	141.2	162.9
O14617	AP3D1	AP-3 complex subunit delta-1	Homo sapiens	High	41	3146.2	3112.6	3035.8	3211.7	3227.7	3036.4	3296.6	3358.3	3015.9	3233.9	3179.9
Q9Y2T2	AP3M1	AP-3 complex subunit mu-1	Homo sapiens	High	15	1435.2	1435.5	1467.1	1592.8	1476.2	1697.3	1438.9	1514	1459.7	1580.4	1579.6
P53677	AP3M2	AP-3 complex subunit mu-2	Homo sapiens	High	1	19.6	26	24	18.6	21.4	19.7	20	30.7	24	32	23.6
Q92572	AP3S1	AP-3 complex subunit sigma-1	Homo sapiens	High	9	866.5	796.4	844.6	807.9	782.9	697.3	744.1	683.3	799.3	698.5	803.9
Q9Y6B7	AP4B1	AP-4 complex subunit beta-1	Homo sapiens	High	7	385.2	352.3	367.6	388.5	419	345.6	405	397.9	350.7	353.7	352
Q9UPM8	AP4E1	AP-4 complex subunit epsilon-1	Homo sapiens	High	17	552.9	534.1	533.6	587.1	607.8	572.6	548	601	521.9	555.6	549
O00189	AP4M1	AP-4 complex subunit mu-1	Homo sapiens	High	7	332.7	344	343.9	333.9	346.1	349.9	338.7	331.3	356	326.9	339.9
Q9Y587	AP4S1	AP-4 complex subunit sigma-1	Homo sapiens	High	2	116.6	97.5	95.5	107.4	101.9	103.9	105.2	95.2	107.6	96.3	105.7
Q2VPB7	AP5B1	AP-5 complex subunit beta-1	Homo sapiens	High	4	166	163.3	174.5	179.7	202.8	150.4	168.9	170.9	143.8	153.7	175.1
Q9H0R1	AP5M1	AP-5 complex subunit mu-1	Homo sapiens	High	5	227.9	235	235.4	225	219.2	210	231.6	225.2	225.9	222	254.7
O43299	AP5Z1	AP-5 complex subunit zeta-1	Homo sapiens	High	5	263	248.3	252.3	238	239.7	179.9	218.3	209.4	251.2	222.1	265.6
O14727	APAF1	Apoptotic protease-activating factor 1	Homo sapiens	High	6	169.1	155.6	162.6	164.5	150.2	141.8	167.4	156	154.7	141.4	168.1
O96018	APBA3	Amyloid beta A4 precursor protein-binding family A member 3	Homo sapiens	High	3	175.2	182.1	182.7	183.2	204.2	176.4	209.2	181.6	215.4	167.6	206
Q7Z5R6	APBB1IP	Amyloid beta A4 precursor protein-binding family B member 1-interacting protein	Homo sapiens	High	20	2004.4	2039.5	2012.9	1924.6	1890	1627.1	2105.6	2111.3	1989.7	1979	2033.1
P25054	APC	Adenomatous polyposis coli protein	Homo sapiens	High	22	595.8	585.2	604.2	597.1	556.6	507	594.9	576.6	589.1	571.6	611.8
P13798	APEH	Acylamino-acid-releasing enzyme	Homo sapiens	High	24	2493.3	2406.3	2455.6	2476.5	2443.8	2470	2353.2	2297.8	2378.3	2336.7	2483.9
P27695	APEX1	DNA-(apurinic or apyrimidinic site) lyase	Homo sapiens	High	28	3617.2	3670.4	3815.4	3898.7	3665	4042.8	3767.2	3752.5	3667.8	3726.2	3620.7
Q9UBZ4	APEX2	DNA-(apurinic or apyrimidinic site) lyase 2	Homo sapiens	High	4	94.6	89	87	87.3	72.8	59	89.8	87.6	90.6	93.9	101.9
Q96BI3	APH1A	Gamma-secretase subunit APH-1A	Homo sapiens	High	3	76	91.1	90.6	104.7	97	117.7	95.2	119	84	107.4	98.1
Q9BZZ5-2	API5	Isoform 2 of Apoptosis inhibitor 5	Homo sapiens	High	5	19.2	13.9	19.6	12.6	15.8	11.3	19	15.4	14.4	16.1	16
Q9BZZ5	API5	Apoptosis inhibitor 5	Homo sapiens	High	31	3068.4	3035.3	3008.4	3070.8	2778.6	2590.8	3132.9	3225.5	3114.6	3358.7	3058.2
Q96GX9	APIP	Methylthioribulose-1-phosphate dehydratase	Homo sapiens	High	11	1352.3	1292.3	1367.8	1343.3	1222.2	1437.3	1329.2	1287.1	1308.9	1294.7	1352
Q8N2Z9	APITD1	Centromere protein S	Homo sapiens	High	4	81.9	76.4	83.9	76.9	77.9	69.1	57.8	60.9	64.4	70.8	77.7
Q9HDC9	APMAP	Adipocyte plasma membrane-associated protein	Homo sapiens	High	18	1492.4	1391.2	1483.5	1609.2	1543.1	1750.2	1396.3	1423.8	1423.1	1547.3	1491.2
P02647	APOA1	Apolipoprotein A-I	Homo sapiens	High	1	67.4	44.9	56.7	87.9	82.8	80.5	43	49.3	43.6	55.3	48.6
P06727	APOA4	Apolipoprotein A-IV	Homo sapiens	High	1	58.2	47.5	55.9	66.9	85.3	58.7	45.8	40.3	46.9	57	48.4
P04114	APOB	Apolipoprotein B-100	Homo sapiens	High	6	638.6	601.2	544.2	630.2	563.5	496.4	517.9	474.8	587.1	549.5	550.7
Q9Y235	APOBEC2	C->U-editing enzyme APOBEC-2	Homo sapiens	High	1	57.9	54.9	36.7	38.7	31.5	86	36.4	43.7	37.3	74.7	85.2
Q9UH17	APOBEC3B	DNA dC->dU-editing enzyme APOBEC-3B	Homo sapiens	High	3	199	176.2	183.1	231.5	91.5	105.6	106.1	119.2	99.7	130.6	120.1
Q9NRW3	APOBEC3C	DNA dC->dU-editing enzyme APOBEC-3C	Homo sapiens	High	4	538.5	530.9	511	583.8	85	56.8	70.5	66.6	67.7	67.1	74.6
Q96AK3	APOBEC3D	DNA dC->dU-editing enzyme APOBEC-3D	Homo sapiens	High	1	94.6	104.2	91.7	89.6	17.8	12.6	21.5	23.8	20.3	19.5	27.3
Q9HC16	APOBEC3G	DNA dC->dU-editing enzyme APOBEC-3G	Homo sapiens	High	2	89	77.5	94.3	90.6	33.1	42.5	39.1	32.4	40.8	45.1	42
P02655	APOC2	Apolipoprotein C-II	Homo sapiens	High	1	37.7	26.9	38	36.2	52.3	22.1	36.8	15.8	26.5	21.8	27.8
P02656	APOC3	Apolipoprotein C-III	Homo sapiens	High	1	32.9	30.9	29.3	39.9	68.5	52.5	33.8	38.4	34.9	40.7	34.4
P02649	APOE	Apolipoprotein E	Homo sapiens	High	3	362.7	327.1	345.7	347.3	487.4	376.4	251.9	214.8	259.6	327.8	253.8
Q9BQE5	APOL2	Apolipoprotein L2	Homo sapiens	High	9	537.8	513.6	520.7	533.4	452.9	540.1	499.6	541.3	554.9	567.3	553.8
O95236	APOL3	Apolipoprotein L3	Homo sapiens	High	7	270.8	248.4	262.3	269.1	261.2	240	210.7	253.7	302.3	262.5	262.6
O95445	APOM	Apolipoprotein M	Homo sapiens	High	2	144.9	129.3	140.8	163.3	183.8	142.6	136.2	79.3	119.9	129.2	108.1
Q9BUR5	APOO	MICOS complex subunit MIC26	Homo sapiens	High	3	237.2	282.6	227.6	224.6	233.7	248.7	196.9	225.8	283.4	268.6	209.9
Q6UXV4	APOOL	MICOS complex subunit MIC27	Homo sapiens	High	13	639.7	618.7	636.2	653.2	628.8	685.1	650.5	601	649.7	616.9	619.3
Q92624	APPBP2	Amyloid protein-binding protein 2	Homo sapiens	High	4	118	116.7	125.1	107	128.4	105.2	106	101.9	109.4	106.9	119.7
Q9UKG1	APPL1	DCC-interacting protein 13-alpha	Homo sapiens	High	27	1218.3	1236.3	1222.5	1315.3	1493.9	1208.4	1307.1	1367.4	1297.4	1275.3	1281.5
P07741	APRT	Adenine phosphoribosyltransferase	Homo sapiens	High	10	1069.2	1026.4	993.5	993.7	1171.4	875.9	870.6	816.7	1042.2	964.8	1038.5
Q7Z2E3	APTX	Aprataxin	Homo sapiens	High	9	474	420.2	461.4	478.6	488.8	534.7	474.5	446.2	461.3	459.7	493.1
O60306	AQR	Intron-binding protein aquarius	Homo sapiens	High	49	2928.5	2816.9	2879.7	2862.3	3316.3	3053.9	3009.8	2999.4	2892.3	2806.8	2835.6
P10398	ARAF	Serine/threonine-protein kinase A-Raf	Homo sapiens	High	11	704.8	678.9	671.3	705.5	638.9	761.4	633.2	696.1	667.6	702.8	708.8
Q96P48	ARAP1	Arf-GAP with Rho-GAP domain, ANK repeat and PH domain-containing protein 1	Homo sapiens	High	41	1751.8	1708.5	1703.2	1721.7	1747.3	1582.1	1715.5	1751.4	1663.2	1627.6	1744.1
P48444	ARCN1	Coatomer subunit delta	Homo sapiens	High	32	4648	4891	4823.5	4895.8	4495.1	4984.2	4730.8	4769.1	5012.3	4602.9	4823.8
O15033	AREL1	Apoptosis-resistant E3 ubiquitin protein ligase 1	Homo sapiens	High	3	138.1	131.5	153.6	128.5	140.8	115.8	119.6	118.9	132.6	122.8	134
P61204	ARF3	ADP-ribosylation factor 3	Homo sapiens	High	5	3956	3666.5	3664.9	4230.5	3602.5	4391.9	3614.3	3636.5	3719.1	4271	4222.4
P18085	ARF4	ADP-ribosylation factor 4	Homo sapiens	High	6	1271.1	1165.3	1154.6	1468.3	1194	1593.3	1081.7	1264.9	1175.7	1100.7	1378.4
P84085	ARF5	ADP-ribosylation factor 5	Homo sapiens	High	6	548.6	508.6	547.9	594.1	558.8	620.2	538.5	544.3	522.1	517.6	618.3
P62330	ARF6	ADP-ribosylation factor 6	Homo sapiens	High	6	1118.7	1104.4	1111.4	1168.5	1057.1	1272.4	1052.1	1086.3	1113	1151.7	1191.6
Q8N6T3	ARFGAP1	ADP-ribosylation factor GTPase-activating protein 1	Homo sapiens	High	21	1155.1	1128.9	1139.8	1143.7	1130.7	1018	1155.6	1080.3	1135.3	1078.6	1173.4
Q8N6H7	ARFGAP2	ADP-ribosylation factor GTPase-activating protein 2	Homo sapiens	High	19	1404.2	1305.6	1352.9	1385	1367.8	1253.4	1501.5	1549.9	1441	1438	1509.7
Q9NP61	ARFGAP3	ADP-ribosylation factor GTPase-activating protein 3	Homo sapiens	High	24	1135.7	1250.4	1125	1105	898.2	970.6	1065.3	1151.6	1262.1	1199.2	1118.6
Q9Y6D6	ARFGEF1	Brefeldin A-inhibited guanine nucleotide-exchange protein 1	Homo sapiens	High	26	2023.4	1986.9	1988.4	2031.1	2237.7	1941.3	2113.5	2158.8	1916.6	1948.6	2040
Q9Y6D5	ARFGEF2	Brefeldin A-inhibited guanine nucleotide-exchange protein 2	Homo sapiens	High	23	989	979.7	994.4	1005.3	1008.4	948.4	1006.8	954.2	956	889.3	987.6
P53367	ARFIP1	Arfaptin-1	Homo sapiens	High	16	948.9	911	930.8	872.5	948	810	911.8	837.7	873.4	854.3	915.1
P53365	ARFIP2	Arfaptin-2	Homo sapiens	High	7	508.9	512.2	515.6	499.8	544.2	449.4	487.4	483.3	508.5	524	495.9
Q13795	ARFRP1	ADP-ribosylation factor-related protein 1	Homo sapiens	High	7	197.1	220.1	230.4	238	252.2	228.4	246.1	233.5	252.1	216.6	232.2
P05089	ARG1	Arginase-1	Homo sapiens	High	7	248.4	264.6	228.3	198.5	274.6	204	187.2	151.9	210	312.8	220
P78540	ARG2	Arginase-2, mitochondrial	Homo sapiens	High	6	124.9	127.1	115.4	86.9	93.7	104.2	115.1	115.2	127.7	111.1	86.9
Q9NWB6	ARGLU1	Arginine and glutamate-rich protein 1	Homo sapiens	High	15	1642.2	1645.2	1652.6	1641	1689.6	1817.7	1849.4	1733.1	1778.3	1750.7	1705.4
Q07960	ARHGAP1	Rho GTPase-activating protein 1	Homo sapiens	High	17	1421.6	1358.6	1373.2	1401.4	1526.9	1297.5	1421.3	1420.4	1321.2	1282.9	1366.7
Q6P4F7	ARHGAP11A	Rho GTPase-activating protein 11A	Homo sapiens	High	14	392.3	417.8	406.5	365.2	466.9	491.8	432.8	456.7	412	388.1	423
Q8IWW6	ARHGAP12	Rho GTPase-activating protein 12	Homo sapiens	High	13	479.3	471.9	477.7	475.2	487	503.7	468.3	460.5	487.9	468.7	507.6
Q53QZ3	ARHGAP15	Rho GTPase-activating protein 15	Homo sapiens	High	19	1819.7	1841.8	1828.9	1970.9	1685	1728.4	1754.1	1816.2	1856.7	1840.4	1871.2
I3L3P1	ARHGAP17	Rho GTPase-activating protein 17 (Fragment)	Homo sapiens	High	1	16.3	13.5	17.1	18	13.8	13.1	18.8	18.1	16.3	13.2	17.4
Q68EM7	ARHGAP17	Rho GTPase-activating protein 17	Homo sapiens	High	14	651.3	625.8	626.4	583.7	650.2	534.3	633.5	672.1	618.5	598.9	575.6
Q14CB8	ARHGAP19	Rho GTPase-activating protein 19	Homo sapiens	High	15	697.3	706.6	714.7	622.2	826.7	856.8	653.8	689	668.4	675.4	653.1
Q5T5U3	ARHGAP21	Rho GTPase-activating protein 21	Homo sapiens	High	5	131.9	125.3	135	134.2	131.1	155.6	148.7	159.4	151.6	125.9	150.3
Q9UNA1	ARHGAP26	Rho GTPase-activating protein 26	Homo sapiens	High	2	30.7	35.9	32.1	34.9	30.5	40.2	44.5	50.2	30.2	33.6	25
E9PNT2	ARHGAP27	Rho GTPase-activating protein 27	Homo sapiens	Medium	2	23.8	26.4	30.9	24.4	17.9	18.2	23	22	22.2	27.1	26.2
Q6ZUM4	ARHGAP27	Rho GTPase-activating protein 27	Homo sapiens	High	9	186.8	177.3	186	201.4	177.6	171.3	171.3	165.7	184.4	186.8	185.4
Q9P2N2	ARHGAP28	Rho GTPase-activating protein 28	Homo sapiens	High	2	70.8	78.8	69.3	86.4	90.6	94.9	84.9	93.1	79.5	88.2	78.1
Q7Z6I6	ARHGAP30	Rho GTPase-activating protein 30	Homo sapiens	High	28	1529.2	1557.1	1594.4	1539.2	1538.2	1460.3	1611.6	1689.5	1543.4	1605.3	1604.3
Q9NRY4	ARHGAP35	Rho GTPase-activating protein 35	Homo sapiens	High	34	1598	1701.1	1613.6	1581.6	1604.1	1601	1572.7	1661.7	1589.6	1533.7	1601.1
P98171	ARHGAP4	Rho GTPase-activating protein 4	Homo sapiens	High	26	1390.5	1425.3	1399.4	1379.8	1428.4	1220.1	1312.2	1325.7	1311.9	1311.2	1365.3
Q13017	ARHGAP5	Rho GTPase-activating protein 5	Homo sapiens	High	18	584.6	545.5	543.5	601.8	602.5	577	607.3	590.3	562.7	567.6	577.5
O43182	ARHGAP6	Rho GTPase-activating protein 6	Homo sapiens	Medium	1	69.8	197.4	179	95	55.1	116.2	46.8	55.1	51.1	82.2	178.4
Q9BRR9	ARHGAP9	Rho GTPase-activating protein 9	Homo sapiens	High	14	579.1	610.2	592.6	600.5	634.1	629.9	613.2	627.8	606.1	572.3	630.7
P52565	ARHGDIA	Rho GDP-dissociation inhibitor 1	Homo sapiens	High	15	3035.3	3084.3	3101.4	2922.3	2630.6	3291.4	2780.4	2855.2	3190.3	3119.4	3046.7
P52566	ARHGDIB	Rho GDP-dissociation inhibitor 2	Homo sapiens	High	26	5737.8	5858.3	6152.3	6245.8	4467.7	5641.8	5444.1	5312.5	6046.2	5929.9	5923.5
M0QZR4	ARHGEF1	Rho guanine nucleotide exchange factor 1	Homo sapiens	High	9	18.7	17.3	19.3	19.3	17.7	22.4	18.6	25.2	18.6	18.5	18
Q92888	ARHGEF1	Rho guanine nucleotide exchange factor 1	Homo sapiens	High	31	2037.2	2139.9	2030.4	1881.2	2076.6	1645.3	2046.3	2029.7	1849.4	2004.3	1883.1
Q6ZSZ5	ARHGEF18	Rho guanine nucleotide exchange factor 18	Homo sapiens	High	25	1114.6	1072.3	1046.7	1031.6	1057.4	859	1165	1168.3	1034.2	1041.9	1086.3
V9GYF0	ARHGEF2	Rho guanine nucleotide exchange factor 2 (Fragment)	Homo sapiens	Medium	5	20.6	18	18.1	16.5	14.1	13.1	12.1	13.3	13.8	16.2	16.8
Q92974	ARHGEF2	Rho guanine nucleotide exchange factor 2	Homo sapiens	High	51	3013.4	3067.2	3116	2923.3	3073.5	2626.7	3012.4	3011.1	2968	3027.3	3042.1
Q96DR7	ARHGEF26	Rho guanine nucleotide exchange factor 26	Homo sapiens	High	8	299.2	241.7	272.2	240.3	249.9	254.6	227.9	236.4	272.5	243.8	291.3
Q15052	ARHGEF6	Rho guanine nucleotide exchange factor 6	Homo sapiens	High	31	2138.1	2293.7	2239.6	2215.6	1676.1	1222.7	2062.2	2162.5	2234.8	2227.7	2254.6
Q14155-5	ARHGEF7	Isoform 5 of Rho guanine nucleotide exchange factor 7	Homo sapiens	High	5	180.6	191.3	205.8	193.2	145.7	93.5	182.9	167.6	187.6	165.6	195.3
Q14155	ARHGEF7	Rho guanine nucleotide exchange factor 7	Homo sapiens	High	15	563.5	565.7	547.5	533.4	435.2	301.3	540.1	546.3	572.4	509.1	560.6
O14497	ARID1A	AT-rich interactive domain-containing protein 1A	Homo sapiens	High	53	3381.4	3362.6	3395.6	3368.1	3798.3	2956.3	3554.6	3759.9	3138.5	3216.6	3231.3
Q8NFD5	ARID1B	AT-rich interactive domain-containing protein 1B	Homo sapiens	High	14	645.1	681.7	664.1	660.7	698.5	646.5	638.7	715.3	625.8	620.8	693.3
Q68CP9	ARID2	AT-rich interactive domain-containing protein 2	Homo sapiens	High	30	1783.8	1782.1	1736.6	1748.5	1892.3	1620.4	1747.8	1781.8	1763.1	1734.3	1705.6
Q99856	ARID3A	AT-rich interactive domain-containing protein 3A	Homo sapiens	High	14	606.5	597.4	573.1	614.6	594.2	419.9	643.4	662.5	587.7	588.1	583.6
Q8IVW6	ARID3B	AT-rich interactive domain-containing protein 3B	Homo sapiens	High	11	363.5	366.4	340.9	360.4	333.8	221.1	343.8	400.6	366	300.3	300.4
P29374	ARID4A	AT-rich interactive domain-containing protein 4A	Homo sapiens	High	20	593.8	609.8	606.5	592	517.2	521.5	601.3	581.5	619.4	578.9	613.4
Q4LE39	ARID4B	AT-rich interactive domain-containing protein 4B	Homo sapiens	High	21	794.9	850.6	811.6	856.7	716.2	773.5	822.2	815.2	881.4	841.6	820.9
Q14865	ARID5B	AT-rich interactive domain-containing protein 5B	Homo sapiens	High	16	764.2	782.9	769.8	759.6	773.2	643	833.1	888.8	790.7	839.3	799.5
Q9Y4X5	ARIH1	E3 ubiquitin-protein ligase ARIH1	Homo sapiens	High	18	714.5	807	808	780.7	957.9	865.9	1036.2	982.5	872.8	718.7	810.2
O95376	ARIH2	E3 ubiquitin-protein ligase ARIH2	Homo sapiens	High	18	779.1	829.2	819.8	817	924.1	877.5	874.8	899	868.5	791.4	849.3
P40616	ARL1	ADP-ribosylation factor-like protein 1	Homo sapiens	High	9	988.9	934.8	970.9	985.5	955.2	1085.9	916.8	959.1	962.2	1026.5	997.6
Q3SXY8	ARL13B	ADP-ribosylation factor-like protein 13B	Homo sapiens	High	4	247	260.8	279.3	253.5	261.2	236.8	251.7	247.3	263.1	257.3	284.6
Q8N8R7	ARL14EP	ARL14 effector protein	Homo sapiens	High	5	230.8	207.1	232.3	225.2	251.4	217.5	227.2	203.6	194.7	206.5	234.3
P36404	ARL2	ADP-ribosylation factor-like protein 2	Homo sapiens	High	9	1183.4	1138.9	1124.1	1090.2	1071	1030.9	994.6	936	1167.8	1135.1	1166.2
Q9Y2Y0	ARL2BP	ADP-ribosylation factor-like protein 2-binding protein	Homo sapiens	High	4	240.8	258	254.8	288.1	244.2	198.5	224.2	232.5	249	250	257.3
P36405	ARL3	ADP-ribosylation factor-like protein 3	Homo sapiens	High	8	332.9	337.2	342.8	372	345.3	315.3	311.4	317.8	369.9	326.3	357.1
P56559	ARL4C	ADP-ribosylation factor-like protein 4C	Homo sapiens	High	3	204.4	202.5	201.1	181.2	168	100.9	157.8	168.9	209.6	168.8	211.2
Q9Y689	ARL5A	ADP-ribosylation factor-like protein 5A	Homo sapiens	High	1	122.3	123.8	129.8	130.4	133.4	105.9	112.7	126.6	121.4	141.7	140.4
Q96KC2	ARL5B	ADP-ribosylation factor-like protein 5B	Homo sapiens	High	2	166	148.7	149.1	159.6	160.3	156.8	161	146.9	167.9	169.3	176.3
Q9H0F7	ARL6	ADP-ribosylation factor-like protein 6	Homo sapiens	High	5	127.2	115.3	134.6	119.1	142.3	128.3	134.7	116.7	129.8	116.9	129.4
Q15041	ARL6IP1	ADP-ribosylation factor-like protein 6-interacting protein 1	Homo sapiens	High	3	175.3	155.7	170.2	183.8	194.1	265.7	141.8	166.3	163.3	199.9	178.6
Q66PJ3	ARL6IP4	ADP-ribosylation factor-like protein 6-interacting protein 4	Homo sapiens	High	8	507.9	550.9	512.2	534.4	388.2	454.4	479.6	480	537.7	584.4	529.5
O75915	ARL6IP5	PRA1 family protein 3	Homo sapiens	High	5	723.7	643.3	656.8	624.3	705.8	692.6	627.5	564.5	620.9	623.5	629.9
Q8N6S5	ARL6IP6	ADP-ribosylation factor-like protein 6-interacting protein 6	Homo sapiens	High	4	230	245.1	219.5	219.8	178.4	171	202.6	195.5	231	219.3	232.1
Q96BM9	ARL8A	ADP-ribosylation factor-like protein 8A	Homo sapiens	High	5	479.2	501.9	479.5	487.8	525.3	498.4	485.5	474	496.6	451.2	509.1
Q9NVJ2	ARL8B	ADP-ribosylation factor-like protein 8B	Homo sapiens	High	6	271.9	253.1	265.8	282.8	277	300.2	270.8	248.6	258.5	272.7	262.4
Q9NVT9	ARMC1	Armadillo repeat-containing protein 1	Homo sapiens	High	6	274.5	258.4	249.1	265.1	271.3	233.5	251.9	231.9	246.8	245.4	265.1
Q8N2F6	ARMC10	Armadillo repeat-containing protein 10	Homo sapiens	High	13	952.7	914.8	934.3	924.5	913.7	839.2	907	845.8	926.9	982.5	953.5
Q8N2F6-2	ARMC10	Isoform 2 of Armadillo repeat-containing protein 10	Homo sapiens	High	4	82.4	61.5	81.6	43.7	82.4	126.3	46.9	43.2	72.6	54.6	42.3
Q8NEN0	ARMC2	Armadillo repeat-containing protein 2	Homo sapiens	Medium	1	39.8	118.1	54.1	122	80	40.3	137.7	106.1	66.8	120.7	164.2
Q96C12	ARMC5	Armadillo repeat-containing protein 5	Homo sapiens	High	3	65.3	49.6	55.3	57.6	49.1	56.2	61.5	54.7	52.7	55.8	57.7
Q6NXE6	ARMC6	Armadillo repeat-containing protein 6	Homo sapiens	High	15	1349.1	1436.6	1340.4	1319.9	1507.6	1483.4	1395.6	1384.7	1353.4	1304.7	1299.1
Q8IUR7	ARMC8	Armadillo repeat-containing protein 8	Homo sapiens	High	18	1078	1064	1021.2	1053	1207.9	1001.1	1126	1101.8	1068.7	991.7	1044
Q9UH62	ARMCX3	Armadillo repeat-containing X-linked protein 3	Homo sapiens	High	13	750.8	706.2	724.5	694.3	771.6	721.8	724.4	695.5	665.4	701.8	727.3
Q6P1M9	ARMCX5	Armadillo repeat-containing X-linked protein 5	Homo sapiens	High	4	192.8	165.4	179.8	187.1	140	107.6	155.5	178.4	189.3	189.9	195.4
Q9H993	ARMT1	Protein-glutamate O-methyltransferase	Homo sapiens	High	17	1878.8	1912.5	1771.4	1801.9	1856.1	1808.2	1928	1802.8	1889.5	1910	1723.3
P27540	ARNT	Aryl hydrocarbon receptor nuclear translocator	Homo sapiens	High	9	248.9	269.1	266.6	282.2	299.8	190.7	316	324.5	278.3	248.9	271.8
Q92747	ARPC1A	Actin-related protein 2/3 complex subunit 1A	Homo sapiens	High	12	526.8	591.4	549.2	600.5	706	769.8	629.5	663.1	583.3	547.5	590.7
O15143	ARPC1B	Actin-related protein 2/3 complex subunit 1B	Homo sapiens	High	16	1637.2	1903.5	1712.6	1712.4	1763.6	2011.8	1864.5	1925.3	1926.9	1848.1	1812.9
O15144	ARPC2	Actin-related protein 2/3 complex subunit 2	Homo sapiens	High	23	2523	2345	2503.9	2472.6	2467.1	2713.3	2422	2348.2	2443.7	2379	2589.9
O15145	ARPC3	Actin-related protein 2/3 complex subunit 3	Homo sapiens	High	9	997.7	976.7	989.1	895.8	988.1	781.8	775.9	801.4	950.6	1065.8	971.9
P59998	ARPC4	Actin-related protein 2/3 complex subunit 4	Homo sapiens	High	10	1044.3	1079.3	1000.9	982.8	952.7	950.2	940.4	857.3	1091.4	1083.8	1067.1
O15511	ARPC5	Actin-related protein 2/3 complex subunit 5	Homo sapiens	High	9	1066.2	927.9	977.9	978.1	890.7	675.7	842.3	781.2	914.7	860	960.4
Q9BPX5	ARPC5L	Actin-related protein 2/3 complex subunit 5-like protein	Homo sapiens	High	7	424.5	387.8	385.3	314.5	393.1	277.9	343.6	296	403.1	360	370.3
P56211	ARPP19	cAMP-regulated phosphoprotein 19	Homo sapiens	High	4	885.5	788.8	831.5	790	1092.6	469.5	662.7	696.4	634.9	737.2	757
Q9UBL0	ARPP21	cAMP-regulated phosphoprotein 21	Homo sapiens	High	5	145.4	143.4	140.1	133.8	141	120.6	150.7	133.9	136.1	140.2	139.5
P32121	ARRB2	Beta-arrestin-2	Homo sapiens	High	19	1322.6	1479.1	1408.6	1331.1	1432.6	1422.5	1454.6	1547.9	1446.9	1368.8	1442.4
Q8N5I2	ARRDC1	Arrestin domain-containing protein 1	Homo sapiens	High	3	227.7	210	219.2	233.7	235.8	245.3	196.6	205.8	204.2	224.6	237.7
P15289	ARSA	Arylsulfatase A	Homo sapiens	High	2	31.9	28.4	30.2	38.6	31.5	29.7	25.9	29.5	27	23.7	31.8
P15848	ARSB	Arylsulfatase B	Homo sapiens	High	1	20.5	23	22.5	22.3	22.2	26.7	18.2	26.4	17.3	20.4	24.5
Q6UWY0	ARSK	Arylsulfatase K	Homo sapiens	High	3	112.9	128.3	130.1	132.2	114	121.8	102.5	128.8	140.4	143.4	123.4
Q9HBK9	AS3MT	Arsenite methyltransferase	Homo sapiens	High	12	564.1	582.9	585.3	641.4	574.7	549.8	584.5	570	566.1	555.7	633.9
Q13510	ASAH1	Acid ceramidase	Homo sapiens	High	11	512.4	486.2	474.6	483.5	514.5	522.4	455.7	496.3	458.7	474.5	502.2
Q9ULH1	ASAP1	Arf-GAP with SH3 domain, ANK repeat and PH domain-containing protein 1	Homo sapiens	High	19	976.4	946.2	931.7	977.5	981.2	891.1	984.9	979.8	922.3	939.1	1023
Q9Y576	ASB1	Ankyrin repeat and SOCS box protein 1	Homo sapiens	High	2	67.1	68.2	59.7	63.5	70.3	71.1	60.7	59.8	65.4	62.3	73.4
Q9Y575	ASB3	Ankyrin repeat and SOCS box protein 3	Homo sapiens	High	2	16	17.6	21.7	16	31.8	11	22.5	18.6	17.5	14.8	18.3
Q9NWX5	ASB6	Ankyrin repeat and SOCS box protein 6	Homo sapiens	High	10	556.6	547.1	526.2	552.6	590.4	594.1	542	559	556.6	580.6	547.3
Q96DX5	ASB9	Ankyrin repeat and SOCS box protein 9	Homo sapiens	High	2	77.7	78.2	82	75.8	75.7	72.1	90	74.7	77.7	70.5	80.5
Q8N9N2-2	ASCC1	Isoform 2 of Activating signal cointegrator 1 complex subunit 1	Homo sapiens	High	4	39.5	43.8	44.4	36.4	43.5	28.7	44.2	45.1	35.6	39.7	39.8
Q8N9N2	ASCC1	Activating signal cointegrator 1 complex subunit 1	Homo sapiens	High	10	504.2	478.4	497	532.1	508.8	515.9	466.3	500.9	500.7	480.7	511.3
H7C395	ASCC2	Activating signal cointegrator 1 complex subunit 2 (Fragment)	Homo sapiens	High	2	17	12.8	13	14.1	12.7	13.2	18.7	17.9	14.9	16.1	16.7
Q9H1I8	ASCC2	Activating signal cointegrator 1 complex subunit 2	Homo sapiens	High	18	777.5	777.2	771.5	777.5	800.4	812.8	819.1	859.7	803.9	779	764.2
Q8N3C0	ASCC3	Activating signal cointegrator 1 complex subunit 3	Homo sapiens	High	55	3781.2	3752.5	3681.6	3886.5	3919.5	4055.6	3717.1	3981.7	3673.9	3719.2	3969.7
Q9Y294	ASF1A	Histone chaperone ASF1A	Homo sapiens	High	7	439.6	510.1	456.4	474.3	427	392.7	466.1	487.6	486	495.9	494.5
Q9NVP2	ASF1B	Histone chaperone ASF1B	Homo sapiens	High	6	324.7	335	331.1	379.4	313.5	212.2	321.5	370.9	365	374.2	394.6
Q9NR48	ASH1L	Histone-lysine N-methyltransferase ASH1L	Homo sapiens	Medium	1	36.5	38.9	41.6	33.4	42.1	29.4	32.5	37.8	43.3	30.6	51.2
Q9UBL3	ASH2L	Set1/Ash2 histone methyltransferase complex subunit ASH2	Homo sapiens	High	23	1782.6	1818.6	1812.6	1813.4	1871.4	1844.1	1732.3	1840.8	1823.2	1782	1797.4
P04424	ASL	Argininosuccinate lyase	Homo sapiens	High	12	330.3	378.9	318.3	351.2	323	292.3	331.7	336.4	350	348.9	365.7
O95671	ASMTL	N-acetylserotonin O-methyltransferase-like protein	Homo sapiens	High	14	957.1	1004.1	944.7	926.3	1008	894.9	1075	1033	997.3	985	1004.5
O43681	ASNA1	ATPase ASNA1	Homo sapiens	High	13	914.1	851.2	888.2	897.5	972.1	894.5	926.7	892.7	881.7	829	859
P08243	ASNS	Asparagine synthetase [glutamine-hydrolyzing]	Homo sapiens	High	28	4314.8	4357.1	4353	4319.5	4527.2	4437.7	4360.1	4203.4	4134.6	4223.6	4394.7
U3KQP1	ASNSD1	Asparagine synthetase domain-containing protein 1 (Fragment)	Homo sapiens	High	2	68.3	60.7	67.6	64	64.5	45.6	52.2	54.9	54.7	58.1	64.2
Q9NWL6	ASNSD1	Asparagine synthetase domain-containing protein 1	Homo sapiens	High	3	135.3	140.7	142.7	142.4	170.6	144	146.9	148.2	150.3	142.9	142.3
Q12797	ASPH	Aspartyl/asparaginyl beta-hydroxylase	Homo sapiens	High	15	678.3	682.8	658.2	668.7	690.9	741.2	679	676.4	687.3	677.2	648.8
Q5U4P2	ASPHD1	Aspartate beta-hydroxylase domain-containing protein 1	Homo sapiens	High	2	48.3	49.6	50.6	55.6	39.1	67.9	51.2	60.8	53.9	44.3	56.3
Q8IZT6	ASPM	Abnormal spindle-like microcephaly-associated protein	Homo sapiens	High	49	1456.2	1425.2	1449.9	1441.5	2291.5	2647.2	1674.9	1621.4	1395.8	1416.2	1439.8
Q9BZE9	ASPSCR1	Tether containing UBX domain for GLUT4	Homo sapiens	High	14	694.7	689.6	700.7	635.3	790	648.1	747.2	764.6	686.4	669	669.2
Q7L266	ASRGL1	Isoaspartyl peptidase/L-asparaginase	Homo sapiens	High	10	541.9	525.9	516.6	496.7	473.9	482.8	482.9	442.1	527.5	491.4	528.7
P00966	ASS1	Argininosuccinate synthase	Homo sapiens	High	23	2950.1	3095.7	3003.5	2947.1	2867	3115.1	2986.5	2842.3	2993.5	2829.7	2774.8
Q2TB18	ASTE1	Protein asteroid homolog 1	Homo sapiens	High	9	278.2	269.3	282.6	260	314.5	286.3	287.8	298.5	254	267.4	266.9
Q9NVM9	ASUN	Protein asunder homolog	Homo sapiens	High	22	1244	1229.3	1247	1223.9	1284.9	1283.5	1257.1	1258.2	1231.3	1266.6	1228.8
Q8IXJ9	ASXL1	Putative Polycomb group protein ASXL1	Homo sapiens	High	5	141.5	130.4	137.8	145.4	132.5	136.9	133.8	141.7	131	131.4	138.3
Q76L83	ASXL2	Putative Polycomb group protein ASXL2	Homo sapiens	High	5	437.5	346.5	397.7	373.3	439.5	274.6	383.2	369.7	354.3	349.3	374.5
Q8NBU5	ATAD1	ATPase family AAA domain-containing protein 1	Homo sapiens	High	13	1014.9	1028.5	1033.8	1052.1	1352.9	1271.5	1080.8	1094.9	1035.2	1023.4	1024.5
Q6PL18	ATAD2	ATPase family AAA domain-containing protein 2	Homo sapiens	High	42	3436.8	3366.2	3412.1	3566.3	2064.7	1293.7	2705.1	2950.9	3336.6	3132.9	3450.9
Q9ULI0	ATAD2B	ATPase family AAA domain-containing protein 2B	Homo sapiens	High	29	1119.8	1122.6	1126.4	1107.2	1048.1	1056	1081.9	1086.2	1133.8	1068.6	1052.7
Q9NVI7	ATAD3A	ATPase family AAA domain-containing protein 3A	Homo sapiens	High	11	4023.1	3875.6	3950.6	3850.5	4166.5	4576.5	3988.9	4115.4	3875.2	3961.5	3895.2
Q5T9A4	ATAD3B	ATPase family AAA domain-containing protein 3B	Homo sapiens	High	8	454.9	461.4	450.3	425.1	468.1	530.7	457	463.8	465.1	393.8	433
Q96QE3	ATAD5	ATPase family AAA domain-containing protein 5	Homo sapiens	High	12	341.2	294.6	319	321.8	262.4	271.2	348.6	295	318.7	318.3	327
Q5SQI0	ATAT1	Alpha-tubulin N-acetyltransferase 1	Homo sapiens	High	4	145.7	153	145.5	132.8	166.4	145.5	144.6	153.1	138.1	147.6	138.1
O95260-2	ATE1	Isoform ATE1-2 of Arginyl-tRNA--protein transferase 1	Homo sapiens	Medium	4	566.2	626	539	578	537.9	695.2	568.9	600.3	636.4	553.1	550.4
O95260	ATE1	Arginyl-tRNA--protein transferase 1	Homo sapiens	High	21	639.8	627	602.6	730.1	636.5	794.9	671.7	706.1	650	652.6	677
P18846	ATF1	Cyclic AMP-dependent transcription factor ATF-1	Homo sapiens	High	1	54.2	57.2	46.9	48.1	38.4	34.1	49.5	48.8	56.7	51.9	61.6
P15336	ATF2	Cyclic AMP-dependent transcription factor ATF-2	Homo sapiens	High	12	636.6	636.4	636	631.5	545.5	446	633.5	639.5	633.4	577	594.7
P18847	ATF3	Cyclic AMP-dependent transcription factor ATF-3	Homo sapiens	High	2	37	40.2	39.3	37	31.8	32.5	34.5	37.9	32.1	31.4	33.2
P18850	ATF6	Cyclic AMP-dependent transcription factor ATF-6 alpha	Homo sapiens	High	6	256.8	251.4	249	242.6	199.2	129.8	263.2	265.4	238.4	246.4	257.3
P17544	ATF7	Cyclic AMP-dependent transcription factor ATF-7	Homo sapiens	High	6	268.9	223.6	273.9	252.1	265.5	183.8	264.3	241.6	237.2	232.1	248.1
Q6VMQ6	ATF7IP	Activating transcription factor 7-interacting protein 1	Homo sapiens	High	26	845.4	926.8	910.7	878.3	900.7	773.9	995.4	976.2	905.4	911.6	876.3
Q9BSB4	ATG101	Autophagy-related protein 101	Homo sapiens	High	4	96.9	97.6	105.9	98	105	96.1	91.2	98.1	101.3	97	98
O94817	ATG12	Ubiquitin-like protein ATG12	Homo sapiens	High	4	736	1034.3	972.6	833.1	1195.1	755.8	1045	1119.6	1084.6	848.1	957.8
O75143	ATG13	Autophagy-related protein 13	Homo sapiens	High	8	327.7	330.1	368.1	361.8	361.6	318.4	329.2	366.4	344.9	350.4	375.5
Q676U5	ATG16L1	Autophagy-related protein 16-1	Homo sapiens	High	15	574.5	581.5	567.9	601.6	584.7	668.2	568.7	616.5	557.6	598.8	580.3
Q2TAZ0	ATG2A	Autophagy-related protein 2 homolog A	Homo sapiens	High	13	645.7	694.8	642.1	656.4	612.2	495	626.9	677.9	665.8	626.8	652.8
Q96BY7	ATG2B	Autophagy-related protein 2 homolog B	Homo sapiens	High	12	363.8	364.8	349.1	329.7	404.8	327.2	338.9	349.3	334.6	344	358.2
Q9NT62	ATG3	Ubiquitin-like-conjugating enzyme ATG3	Homo sapiens	High	11	1080.1	1047.2	1065.2	1055.3	1085.9	1022.4	970.3	1038.2	1057.7	994.5	1079
Q8WYN0	ATG4A	Cysteine protease ATG4A	Homo sapiens	High	4	68.9	65.3	66.6	63.6	67.1	67	68.1	66.4	62.7	69.3	62.1
Q9Y4P1	ATG4B	Cysteine protease ATG4B	Homo sapiens	High	15	830.8	955.1	948	909.7	1186.5	987.6	1025.6	1084	971.6	915.8	940.9
Q96DT6	ATG4C	Cysteine protease ATG4C	Homo sapiens	High	3	115.9	119.5	131.9	133.2	127.6	132.4	110.5	133.2	102.2	129.2	133.2
Q9H1Y0	ATG5	Autophagy protein 5	Homo sapiens	High	10	520.5	604.1	594.3	545.6	671.1	573.7	594.2	612.7	533.7	459.8	542.6
O95352	ATG7	Ubiquitin-like modifier-activating enzyme ATG7	Homo sapiens	High	20	753.1	749.2	754.1	792.5	817.5	852.4	769.5	813.8	771.1	746.3	792.6
Q7Z3C6	ATG9A	Autophagy-related protein 9A	Homo sapiens	High	9	272.6	246.2	271.6	379	317.5	327.5	267.8	318.1	279	343.5	324.2
Q32M88	ATHL1	Acid trehalase-like protein 1	Homo sapiens	High	5	180.6	178.9	186.3	174.2	159.7	160.8	161.7	152.1	166.2	169.9	174.7
P31939	ATIC	Bifunctional purine biosynthesis protein PURH	Homo sapiens	High	44	6085.2	6589.2	6302.6	6305.4	6390.9	6662.1	6465.7	6556.9	6668.1	6375	6201.7
Q8NHH9	ATL2	Atlastin-2	Homo sapiens	High	15	872.7	837.4	870.9	827.2	1006.5	987.4	957.2	916.7	894.9	905.6	790.1
Q6DD88	ATL3	Atlastin-3	Homo sapiens	High	25	2631.5	2639.5	2646	2676.5	2751.2	3240.1	2827	2800.2	2813	2997.7	2669.4
Q13315	ATM	Serine-protein kinase ATM	Homo sapiens	High	4	81.3	80.4	88.8	85.5	84.1	87.9	88.5	80.3	77.8	94.8	91.8
P54259	ATN1	Atrophin-1	Homo sapiens	High	2	175.4	151.4	191.4	172.5	148.7	150.1	173.1	159.4	148.9	127.2	178.9
O00244	ATOX1	Copper transport protein ATOX1	Homo sapiens	High	2	181.3	190.2	195.3	175.4	255.4	143	189.3	211.6	193.3	173.3	187.4
Q9Y2G3	ATP11B	Probable phospholipid-transporting ATPase IF	Homo sapiens	High	22	1301.4	1340.7	1323.8	1378.1	1369.7	1324.7	1325.4	1322.2	1311.1	1268.1	1382
Q8NB49	ATP11C	Phospholipid-transporting ATPase IG	Homo sapiens	High	16	807.8	798.6	803.6	870	803	820	786.1	821.4	813.7	753.6	828.1
Q9HD20	ATP13A1	Manganese-transporting ATPase 13A1	Homo sapiens	High	26	1817.6	1774.6	1741.9	2040.9	1949.9	2259	1722.5	1938.9	1817.4	1934.8	1908.3
Q9H7F0	ATP13A3	Probable cation-transporting ATPase 13A3	Homo sapiens	High	11	201.3	201.1	195.1	205.1	198.9	234.3	198.2	194.8	185.7	215.7	209.1
P05023	ATP1A1	Sodium/potassium-transporting ATPase subunit alpha-1	Homo sapiens	High	35	5650.6	5953.3	5822.2	5806.8	5682.1	6444.2	5717.9	5631.6	5685.5	5314.9	5916.5
P13637	ATP1A3	Sodium/potassium-transporting ATPase subunit alpha-3	Homo sapiens	High	28	1970.3	2073.2	2000	2024.1	2019.1	2374.8	2016.7	2039.6	1985.5	2091.1	2012.6
P54709	ATP1B3	Sodium/potassium-transporting ATPase subunit beta-3	Homo sapiens	High	11	1350.6	1258.3	1256.3	1310.1	1176.9	1493.1	1173.8	1093.7	1184.2	1224.7	1275.6
Q9Y6H3	ATP23	Mitochondrial inner membrane protease ATP23 homolog	Homo sapiens	High	2	45	47.6	46.4	43.6	43.4	51.6	47.7	42.1	51.1	45.8	54.9
O14983	ATP2A1	Sarcoplasmic/endoplasmic reticulum calcium ATPase 1	Homo sapiens	High	1	40.6	55.2	37.6	21.7	62.7	71.3	28.4	72.6	30.2	58.5	63.4
P16615	ATP2A2	Sarcoplasmic/endoplasmic reticulum calcium ATPase 2	Homo sapiens	High	30	5965.8	5928.4	5831	6457.6	5965.8	7645.9	5931.3	6109.8	6084.6	6347.7	6225.3
Q93084	ATP2A3	Sarcoplasmic/endoplasmic reticulum calcium ATPase 3	Homo sapiens	High	24	1559.4	1554.3	1548.7	1667.2	1473.7	1497.4	1433.5	1452.3	1507.6	1528.7	1609.6
P20020	ATP2B1	Plasma membrane calcium-transporting ATPase 1	Homo sapiens	High	11	462.6	476.1	491	486.5	556.6	536.6	503.6	533	490.4	484.5	528.5
Q16720	ATP2B3	Plasma membrane calcium-transporting ATPase 3	Homo sapiens	High	2	72.5	64.8	77.3	76.6	106.8	71.3	64.9	63.3	59.2	69.7	69.2
P23634	ATP2B4	Plasma membrane calcium-transporting ATPase 4	Homo sapiens	High	25	2724.1	2783.7	2773.3	2818.5	2678.7	2573.9	2891.2	2938	2824.5	2887.9	2859.5
P98194	ATP2C1	Calcium-transporting ATPase type 2C member 1	Homo sapiens	High	22	746.9	754.8	758.3	834.8	842.9	812.8	831	837.7	781.7	812.3	787
P20648	ATP4A	Potassium-transporting ATPase alpha chain 1	Homo sapiens	High	1	301.7	271.3	282.7	302.1	279.6	357.3	225.5	250.8	306.8	306.7	264.9
P25705	ATP5A1	ATP synthase subunit alpha, mitochondrial	Homo sapiens	High	43	11558.6	11169.3	11440	11170.6	11059.9	12163.2	10940.9	10701.5	11593	11239.5	11313.8
H0YI37	ATP5B	ATP synthase subunit beta, mitochondrial (Fragment)	Homo sapiens	High	4	30.9	29.2	30.9	31.2	30.2	21.9	24	23.1	26	33.2	27
P06576	ATP5B	ATP synthase subunit beta, mitochondrial	Homo sapiens	High	33	10474.6	10123	10229.6	9938.5	10718.9	10842.8	10099.6	10011.7	10433.8	9889.7	9964.1
F8W0P7	ATP5B	ATP synthase subunit beta, mitochondrial (Fragment)	Homo sapiens	Medium	5	752.8	685.6	724.3	772.4	806.1	828.1	722.2	683.2	717	682.3	714.2
P36542	ATP5C1	ATP synthase subunit gamma, mitochondrial	Homo sapiens	High	13	5503.9	5351.1	5513.2	5174.2	5521.3	5762.5	5065.4	4868.5	5453.5	5281.3	5256.7
P30049	ATP5D	ATP synthase subunit delta, mitochondrial	Homo sapiens	High	4	676.5	622.1	629.3	536.1	500.5	535.4	456.6	498	492	531.3	771
P56381	ATP5E	ATP synthase subunit epsilon, mitochondrial	Homo sapiens	High	2	151.6	159.8	157.1	139.5	137.6	109.4	129	117	157.4	136.3	150.8
P24539	ATP5F1	ATP synthase F(0) complex subunit B1, mitochondrial	Homo sapiens	High	12	1135.2	1125.3	1034.5	971.2	1084.8	923.4	863.8	943.3	935.9	1066.1	976.6
P48201	ATP5G3	ATP synthase F(0) complex subunit C3, mitochondrial	Homo sapiens	Medium	1	182.3	165	150.1	180.4	143	173.7	188.8	228.3	137	181.3	184
O75947	ATP5H	ATP synthase subunit d, mitochondrial	Homo sapiens	High	15	1863.6	1816.2	1899.2	1611.1	1998.6	1202.1	1565.9	1343.3	1846.2	1530.9	1881.7
P56385	ATP5I	ATP synthase subunit e, mitochondrial	Homo sapiens	High	5	708.9	731.8	731.6	655.4	841.4	525.8	612.2	602.6	673.1	680	675.1
P18859	ATP5J	ATP synthase-coupling factor 6, mitochondrial	Homo sapiens	High	5	506.2	598.5	549.3	499.7	701.2	373.6	494.7	530.2	470.5	550.1	467.3
P56134	ATP5J2	ATP synthase subunit f, mitochondrial	Homo sapiens	High	3	518.4	508.4	489.1	471.6	549.9	481.7	436	437.5	484	600.9	500.7
O75964	ATP5L	ATP synthase subunit g, mitochondrial	Homo sapiens	High	4	304	262.3	229.4	238.9	314.2	215.6	210.3	193.7	290.4	274	245.3
P48047	ATP5O	ATP synthase subunit O, mitochondrial	Homo sapiens	High	13	2246.7	1971	2005.9	1814.5	2158.4	1580.5	1773.4	1561.2	2042.5	1926.1	1880
H7C068	ATP5O	ATP synthase subunit O, mitochondrial (Fragment)	Homo sapiens	Medium	2	14.7	15.5	19.8	13.3	19.5	17.1	12.7	13.7	17	16.1	17.6
Q99766	ATP5S	ATP synthase subunit s, mitochondrial	Homo sapiens	High	4	289.2	260.2	261.8	240.2	279.3	222.5	227.1	215.8	275.9	250.9	275.2
Q9NW81	ATP5SL	ATP synthase subunit s-like protein	Homo sapiens	High	7	457.2	461.8	473.2	442.1	459.6	389.1	415	429.1	490.2	448.5	450.3
Q15904	ATP6AP1	V-type proton ATPase subunit S1	Homo sapiens	High	14	988	915	932.3	1025.5	853.5	980.2	904.5	954.4	954.2	1145.7	915.8
O75787	ATP6AP2	Renin receptor	Homo sapiens	High	9	531.4	514.4	515	567.6	449.6	452.8	480.3	507.5	556.1	511.9	520.2
Q93050	ATP6V0A1	V-type proton ATPase 116 kDa subunit a isoform 1	Homo sapiens	High	5	197.3	166.2	192.3	187	246.1	251.8	207.1	206.8	174.1	188.1	201.4
Q9Y487	ATP6V0A2	V-type proton ATPase 116 kDa subunit a isoform 2	Homo sapiens	High	12	545.3	532.7	513.2	636.7	573.4	611.6	498.7	535.5	496.4	630.8	539.4
P27449	ATP6V0C	V-type proton ATPase 16 kDa proteolipid subunit	Homo sapiens	High	1	20.4	16.2	14.9	29.2	22.2	37.6	26.6	21.6	16.6	32.8	17.3
P61421	ATP6V0D1	V-type proton ATPase subunit d 1	Homo sapiens	High	5	358.7	403.1	342.6	330.3	383.5	306.6	299.5	311.7	366.3	337.7	332.8
P38606	ATP6V1A	V-type proton ATPase catalytic subunit A	Homo sapiens	High	32	2699.6	2686.2	2673.9	2785.1	2752.1	2777.1	2759.1	2698.9	2698.3	2641.2	2659.5
P21281	ATP6V1B2	V-type proton ATPase subunit B, brain isoform	Homo sapiens	High	27	1865.4	1907.6	1940.5	1889	1994	1861.2	1989.1	1834.8	1898.2	1784.3	1929.3
P21283	ATP6V1C1	V-type proton ATPase subunit C 1	Homo sapiens	High	25	1914.9	1937.7	1871.3	1859.5	1734.6	1754.7	1858.4	1769.6	1931.6	1919.3	1824.1
Q9Y5K8	ATP6V1D	V-type proton ATPase subunit D	Homo sapiens	High	9	715.3	703.5	685.9	650.7	630.5	506.9	626.5	599.2	649.9	681.3	636.4
P36543	ATP6V1E1	V-type proton ATPase subunit E 1	Homo sapiens	High	17	1754.7	1717.4	1686.2	1613	1523.3	1369.6	1419.6	1342.2	1701.4	1587.5	1664.8
Q16864	ATP6V1F	V-type proton ATPase subunit F	Homo sapiens	High	3	302.7	260	244.5	294.8	290.1	222.7	228.1	252	275	267.2	297.3
O75348	ATP6V1G1	V-type proton ATPase subunit G 1	Homo sapiens	High	5	301.3	290.5	278.3	250.2	286	234.8	245.9	274.6	253.7	301.4	253.5
Q9UI12	ATP6V1H	V-type proton ATPase subunit H	Homo sapiens	High	25	1375.8	1402.4	1341.7	1404.1	1357.4	1337.9	1375	1346.9	1354	1387.9	1401.8
Q04656	ATP7A	Copper-transporting ATPase 1	Homo sapiens	High	8	337.6	339	352	342.1	364.1	370	354.8	356.4	342.2	365.1	357.4
Q9Y2Q0	ATP8A1	Phospholipid-transporting ATPase IA	Homo sapiens	High	2	22.4	24.3	19	26.5	28.3	27.8	17.2	26.4	20	23.3	25.8
O43861	ATP9B	Probable phospholipid-transporting ATPase IIB	Homo sapiens	High	2	105.5	113.1	119.5	121	122.9	108.7	115.8	121.2	112.7	102.1	113.5
I3L448	ATPAF1	ATP synthase mitochondrial F1 complex assembly factor 1	Homo sapiens	Medium	4	179.1	166.7	169.7	190.2	172.1	166.2	156.5	160.3	171.1	187.8	173.8
Q5TC12	ATPAF1	ATP synthase mitochondrial F1 complex assembly factor 1	Homo sapiens	High	12	502.3	507	512.4	531.6	683.2	543.1	495.2	501.1	508.5	494.5	581.3
Q8N5M1	ATPAF2	ATP synthase mitochondrial F1 complex assembly factor 2	Homo sapiens	High	6	152.7	140.7	149.1	174.5	189.2	164.1	137.8	154	133.3	183.4	181.2
Q9UII2	ATPIF1	ATPase inhibitor, mitochondrial	Homo sapiens	High	6	455.2	416.3	406.8	391	389.6	412.1	406.8	385.6	416.5	428.1	437.2
Q13535	ATR	Serine/threonine-protein kinase ATR	Homo sapiens	High	47	1798.3	1770.6	1720.3	1776.4	1977.2	1858.1	1826.4	1905.9	1722.4	1738.2	1793.4
Q6UW56	ATRAID	All-trans retinoic acid-induced differentiation factor	Homo sapiens	High	2	75.7	70.9	79.6	76.6	81.1	74.9	76.9	63.6	70	56.2	68.8
Q8WXE1	ATRIP	ATR-interacting protein	Homo sapiens	High	7	201	192.2	206.9	169.4	209.1	172.5	198.4	191.9	184	182	183.9
O75882	ATRN	Attractin	Homo sapiens	High	6	155	156.7	146.7	173.4	167.6	171.4	163.3	175.6	144.6	152	178.4
P46100	ATRX	Transcriptional regulator ATRX	Homo sapiens	High	27	990.6	1037.8	1003.5	1038.2	928.2	1031.3	1005.6	1075.2	1074.6	1007.5	1029.5
Q9UBB4	ATXN10	Ataxin-10	Homo sapiens	High	26	3161.7	3286.2	3032.1	3108.3	3163.2	2938.9	3090.5	3154.9	3244.3	3210.7	3067.3
P0C7T5	ATXN1L	Ataxin-1-like	Homo sapiens	High	2	78.3	70.8	67.7	76.8	71.5	65.1	76.7	76.5	73.3	74.1	72.2
Q99700	ATXN2	Ataxin-2	Homo sapiens	High	29	1911.9	1968.2	1923.5	1883.3	1713	1602.3	1884.9	1967.1	1939.8	1845	1911
F8WB05	ATXN2	Ataxin-2 (Fragment)	Homo sapiens	High	2	74.4	75.5	82.3	62.1	72.3	55.6	82.1	88.7	76.7	84.2	82.5
Q8WWM7	ATXN2L	Ataxin-2-like protein	Homo sapiens	High	36	2593.6	2529.9	2562.7	2340.6	2309.9	2105.6	2631.4	2662.2	2478.6	2567.4	2421
H3BUF6	ATXN2L	Ataxin-2-like protein	Homo sapiens	High	11	1238.2	1305.1	1234.6	1043.6	1411.9	991	1439.6	1292.1	1251	1139.3	1075.2
P54252	ATXN3	Ataxin-3	Homo sapiens	High	9	498.1	472.4	502.7	462.3	540.4	373	454.9	478.7	462.3	433.2	483.3
O15265	ATXN7	Ataxin-7	Homo sapiens	High	1	19.8	22.5	21.3	24.2	13.3	16.2	22	16.8	23.3	12.7	21
Q14CW9	ATXN7L3	Ataxin-7-like protein 3	Homo sapiens	High	3	171.5	174.2	175.2	183.4	150.7	199.4	169.8	190.8	171.6	163.6	163.3
Q96GX2	ATXN7L3B	Putative ataxin-7-like protein 3B	Homo sapiens	High	1	46.6	42.7	40.2	49	40.9	48.2	39.5	44.4	43.4	43.5	49.9
Q13825	AUH	Methylglutaconyl-CoA hydratase, mitochondrial	Homo sapiens	High	3	127.7	130.7	130.4	109.7	140.8	113.5	116.2	93.3	107.8	103.7	116.1
Q9H7T9	AUNIP	Aurora kinase A and ninein-interacting protein	Homo sapiens	High	1	41.6	40.9	44	39.4	38.2	39.4	35.4	40.6	43.7	39	37.9
Q9Y679	AUP1	Ancient ubiquitous protein 1	Homo sapiens	High	10	582	511.7	539	588.5	697.3	703.4	598.9	611	569	516.9	558.7
O14965	AURKA	Aurora kinase A	Homo sapiens	High	14	968.4	955	931.2	888.5	1739.9	1830.6	1128.3	1099.8	884.9	914.7	876.7
Q9NWT8	AURKAIP1	Aurora kinase A-interacting protein	Homo sapiens	High	1	42.4	37.3	30.6	42.8	41.5	45.6	39.4	31.9	45.7	36.1	39.6
Q96GD4	AURKB	Aurora kinase B	Homo sapiens	High	15	781.4	738.3	783.5	732.8	1407.1	1319.8	809	796	715.3	742.1	728.5
Q9NQS1	AVEN	Cell death regulator Aven	Homo sapiens	High	10	352.3	367.2	371.6	331.9	379.5	348.2	359.8	363.4	353.3	321.1	346.5
Q8NBF6	AVL9	Late secretory pathway protein AVL9 homolog	Homo sapiens	High	13	914.7	826.3	854.2	968.2	887.1	899.3	892.8	1017.6	795.4	863	923.3
P25311	AZGP1	Zinc-alpha-2-glycoprotein	Homo sapiens	High	4	135.8	165.3	147.8	113.5	181.1	168.6	132.2	106.4	121.8	192.4	124.7
Q9H6S1	AZI2	5-azacytidine-induced protein 2	Homo sapiens	Medium	1	10.7	13.2	9.8	10.5	8.9	10.5	13.7	13.7	12.4	18.9	13.9
Q8NCR0	B3GALNT2	UDP-GalNAc:beta-1,3-N-acetylgalactosaminyltransferase 2	Homo sapiens	High	1	11.8	13.9	17.7	12.2	18	13	16.9	15.2	12.1	16	15.1
Q96L58	B3GALT6	Beta-1,3-galactosyltransferase 6	Homo sapiens	High	5	215.7	211.7	224	224.8	227.2	261.3	201.4	245.7	193	232.4	237.1
O94766	B3GAT3	Galactosylgalactosylxylosylprotein 3-beta-glucuronosyltransferase 3	Homo sapiens	High	8	496	419.2	470.8	478.1	506.3	473.1	419.9	401.2	429.5	417.8	449.9
Q9NY97	B3GNT2	N-acetyllactosaminide beta-1,3-N-acetylglucosaminyltransferase 2	Homo sapiens	High	5	341.2	317.6	351.9	341.6	315.1	310.1	330.1	345.9	331	306	348.4
O60512	B4GALT3	Beta-1,4-galactosyltransferase 3	Homo sapiens	High	4	68	79.4	70.3	84.6	80.2	73.6	70.9	84.1	70.5	81.2	74.4
O43286	B4GALT5	Beta-1,4-galactosyltransferase 5	Homo sapiens	High	2	42.9	40.1	44.5	44.7	40.7	37.5	37.4	42.6	38.4	35.7	47.1
Q9UBV7	B4GALT7	Beta-1,4-galactosyltransferase 7	Homo sapiens	High	2	36	26.8	34.1	30.9	41.3	39	29.3	36.5	28.4	37.5	29.3
O43505	B4GAT1	Beta-1,4-glucuronyltransferase 1	Homo sapiens	High	4	124.3	117.3	119.9	117.8	125	134.5	109.3	110.6	119.1	107.6	101.5
Q9NWV8	BABAM1	BRISC and BRCA1-A complex member 1	Homo sapiens	High	7	405.8	376.7	416.9	437.9	438.3	427.2	427.9	411.7	397.4	412.6	422.9
O14867	BACH1	Transcription regulator protein BACH1	Homo sapiens	High	2	144.6	137.5	160.6	158	118.1	104	149.6	134.1	124.4	140.7	141.5
Q9BYV9	BACH2	Transcription regulator protein BACH2	Homo sapiens	High	2	40.4	43.1	39.2	32.6	79.9	38.8	38.7	37.1	38.2	38.2	39.8
Q92934	BAD	Bcl2-associated agonist of cell death	Homo sapiens	High	3	82.2	72.9	75.5	68.7	63	72.5	72.1	70.2	71.6	81.2	74.6
Q99933	BAG1	BAG family molecular chaperone regulator 1	Homo sapiens	High	11	627	621.2	618.4	642	599.6	592.6	599.9	617.4	613.8	558.7	611.2
O95816	BAG2	BAG family molecular chaperone regulator 2	Homo sapiens	High	12	1041.4	1054.3	1060.4	1144	1211	1093.3	988.7	1009.1	1084.2	924	1127.2
O95817	BAG3	BAG family molecular chaperone regulator 3	Homo sapiens	High	13	616.2	599.6	602.3	622.2	567	544.8	691.2	734.1	611.6	638	636.4
O95429	BAG4	BAG family molecular chaperone regulator 4	Homo sapiens	High	9	272.1	224.4	262.2	256.3	290.4	178	272.6	263.2	224	235.2	253.1
Q9UL15	BAG5	BAG family molecular chaperone regulator 5	Homo sapiens	High	21	1422.4	1447.3	1454.8	1383.4	1616.3	1331.4	1629.9	1543.3	1440.6	1367.3	1459.2
P46379	BAG6	Large proline-rich protein BAG6	Homo sapiens	High	34	2241.3	2098.6	2151.1	2173.9	2825.5	1965.5	2492	2492.2	2071.7	2008.5	2123.2
Q8TBE0	BAHD1	Bromo adjacent homology domain-containing 1 protein	Homo sapiens	High	3	102	104.9	105	101.9	111.9	122.1	106.2	113.1	103	96.4	108.4
Q16611	BAK1	Bcl-2 homologous antagonist/killer	Homo sapiens	High	5	157.2	151	135.1	139.7	154.8	131	131.6	126.2	138.9	158.9	123.8
O75531	BANF1	Barrier-to-autointegration factor	Homo sapiens	High	4	355.1	352.7	362.4	326.4	375.2	310.9	323.6	284.3	361.3	308.9	332.9
Q8N9N5	BANP	Protein BANP	Homo sapiens	High	6	421.8	394.5	421.3	397.9	405.6	396.3	389.3	397.8	382.5	365.9	390
Q92560	BAP1	Ubiquitin carboxyl-terminal hydrolase BAP1	Homo sapiens	High	11	720.2	752.5	745.6	703	724.4	661.9	684.8	707.4	738	690.1	725.8
Q8IXM2	BAP18	Chromatin complexes subunit BAP18	Homo sapiens	High	8	701.4	649.7	654.1	614.2	530.4	384.9	544.2	549.9	564	600.7	623
Q99728	BARD1	BRCA1-associated RING domain protein 1	Homo sapiens	High	16	952.5	936.7	949.4	897.2	848.5	875.7	871	891.9	908.6	900.1	993.5
Q07812	BAX	Apoptosis regulator BAX	Homo sapiens	High	7	775.8	680.3	672.7	697.3	738	641.6	651.2	577.4	676.1	694.7	650.2
Q9NRL2	BAZ1A	Bromodomain adjacent to zinc finger domain protein 1A	Homo sapiens	High	59	3489.2	3520.4	3569.3	3545.8	3709.5	3875.7	3686.3	3727	3573.2	3619.4	3649.4
Q9UIG0	BAZ1B	Tyrosine-protein kinase BAZ1B	Homo sapiens	High	76	7467.9	7540.2	7643.9	7287	5986.9	5403.7	6856.4	6728.8	7496.8	7022.3	7539.3
Q9UIF9	BAZ2A	Bromodomain adjacent to zinc finger domain protein 2A	Homo sapiens	High	29	1257.1	1237.9	1289.8	1307.6	1231.6	1058.7	1312.6	1339.7	1252.9	1215.6	1277.7
Q9UIF8	BAZ2B	Bromodomain adjacent to zinc finger domain protein 2B	Homo sapiens	High	2	31.5	31.4	31	28.4	32.5	22.5	27.9	31	30.8	28.2	30.6
Q8WY36	BBX	HMG box transcription factor BBX	Homo sapiens	High	18	649.1	636.8	607.9	625.3	500.8	491.5	609.2	634.4	640.6	589.6	643
Q9UHQ4	BCAP29	B-cell receptor-associated protein 29	Homo sapiens	High	8	873.8	860.4	899	887.4	595.9	519.3	751	726.9	827.1	770.5	889
P51572	BCAP31	B-cell receptor-associated protein 31	Homo sapiens	High	24	3176.3	2860.5	2942.2	2646.5	1941.8	1549.7	2721.4	2478.3	2717.7	2989.7	2813.8
O75934	BCAS2	Pre-mRNA-splicing factor SPF27	Homo sapiens	High	16	2219.9	2052.1	2129.6	1999.3	2365.3	1901.1	1876.3	1876	2066.1	1938.7	2154.7
Q9H6U6	BCAS3	Breast carcinoma-amplified sequence 3	Homo sapiens	High	4	194.8	182.6	193.1	205.7	194.5	195.7	209.2	196	191.3	219.7	192.9
P54687	BCAT1	Branched-chain-amino-acid aminotransferase, cytosolic	Homo sapiens	High	15	1771.6	1760.9	1714.1	1837.1	1633.7	1992.2	1615.5	1680.9	1717.3	1671.2	1794.7
O15382	BCAT2	Branched-chain-amino-acid aminotransferase, mitochondrial	Homo sapiens	High	10	1101.7	1005	1015.5	1075.3	1075.9	1128.4	1008.8	942.3	1094.9	1019.9	1102.8
Q9P287	BCCIP	BRCA2 and CDKN1A-interacting protein	Homo sapiens	High	14	1770.6	1704.5	1786.2	1883.7	1866.3	2038.2	1848.7	1776.1	1803.4	1715	1816.7
Q9P287-2	BCCIP	Isoform 2 of BRCA2 and CDKN1A-interacting protein	Homo sapiens	High	2	130.6	114.6	137.6	142.9	146.3	134.3	123.3	116.5	111.9	121	136.8
P06276	BCHE	Cholinesterase	Homo sapiens	High	10	685.7	705.3	695.7	674.7	647.1	622.2	632.8	622.7	644.7	650.9	644.3
P12694	BCKDHA	2-oxoisovalerate dehydrogenase subunit alpha, mitochondrial	Homo sapiens	High	19	1188	1189	1221.9	1219.4	1410.3	1206	1225.9	1158.2	1258	1174.4	1183.5
P21953	BCKDHB	2-oxoisovalerate dehydrogenase subunit beta, mitochondrial	Homo sapiens	High	9	414.2	519	424.5	449.3	397.4	518	402.5	494.6	523.5	489.3	430.9
O14874	BCKDK	[3-methyl-2-oxobutanoate dehydrogenase [lipoamide]] kinase, mitochondrial	Homo sapiens	High	8	408.4	381.1	384	409.9	385.1	369.8	386.5	415.3	426.9	371.5	404.7
O95999	BCL10	B-cell lymphoma/leukemia 10	Homo sapiens	High	10	557.5	610.6	604.8	555.8	631.2	491.3	575.5	560.1	610.3	594.4	598
Q9H165	BCL11A	B-cell lymphoma/leukemia 11A	Homo sapiens	High	12	430.8	392.8	441.1	429.8	427.8	398.8	457.7	432.2	430.8	439.3	441.6
Q9C0K0	BCL11B	B-cell lymphoma/leukemia 11B	Homo sapiens	High	22	1569.2	1674.3	1629.3	1585.5	1518.2	1246.1	1703	1740.9	1746.6	1599.3	1578.5
P10415	BCL2	Apoptosis regulator Bcl-2	Homo sapiens	High	3	55.4	51	49.2	65.5	63	60.8	47.8	54.2	47.5	62.5	54.2
Q07817	BCL2L1	Bcl-2-like protein 1	Homo sapiens	High	4	414.3	387.6	387.4	401.2	377.1	376.1	365.9	340	378.9	384.5	375.5
Q9HB09	BCL2L12	Bcl-2-like protein 12	Homo sapiens	High	1	12.2	10.2	8.2	16.6	16	16.8	12.9	8.4	10.1	12.2	11
Q9BXK5	BCL2L13	Bcl-2-like protein 13	Homo sapiens	High	14	703.3	686.5	702.5	765.1	753	651.8	754.6	821.1	716	705	687.9
Q4VC05	BCL7A	B-cell CLL/lymphoma 7 protein family member A	Homo sapiens	High	7	506.9	454.8	501.9	489.1	403.3	426.2	424.8	432.5	465.4	432	464.8
Q4VC05-2	BCL7A	Isoform 2 of B-cell CLL/lymphoma 7 protein family member A	Homo sapiens	High	3	289.4	263.9	290.1	285.4	244.4	290.6	266.1	280.8	291.9	357.1	281.8
Q9BQE9	BCL7B	B-cell CLL/lymphoma 7 protein family member B	Homo sapiens	High	2	254.5	239.4	230.1	252	215.5	276.1	219.3	216.3	235.2	197.7	223.7
Q8WUZ0	BCL7C	B-cell CLL/lymphoma 7 protein family member C	Homo sapiens	High	1	47.5	45.1	46.4	54.4	52.6	47.2	50.7	48.9	38.2	43.6	50.7
O00512	BCL9	B-cell CLL/lymphoma 9 protein	Homo sapiens	High	5	188.6	167.5	194.2	176.4	184.6	145.5	205.2	204.2	171.5	163.2	168.1
Q86UU0	BCL9L	B-cell CLL/lymphoma 9-like protein	Homo sapiens	Medium	1	106.7	118.8	123.7	91.7	84.7	76.9	85.8	107.4	109.2	114.1	100.5
Q9NYF8	BCLAF1	Bcl-2-associated transcription factor 1	Homo sapiens	High	41	4185.3	4080.6	4327.2	3796.8	3611.3	4085.6	3975.4	3799	4245.8	4027.3	4003.9
Q6W2J9	BCOR	BCL-6 corepressor	Homo sapiens	High	13	492.5	488	505.3	556.5	502	418.3	526	545.8	525.2	488.9	524.3
Q5H9F3	BCORL1	BCL-6 corepressor-like protein 1	Homo sapiens	High	6	225.1	227.3	228.8	234.5	236	245.7	239.3	240.8	243	252.6	247.4
P11274	BCR	Breakpoint cluster region protein	Homo sapiens	High	28	1428.5	1414	1411.3	1451.4	1503.6	1265.5	1418.3	1542.7	1410.9	1339.6	1462.7
Q9Y276	BCS1L	Mitochondrial chaperone BCS1	Homo sapiens	High	13	700.7	684.2	671.9	718	815.4	757.9	733.4	739.9	647.8	684.3	711.1
Q02338	BDH1	D-beta-hydroxybutyrate dehydrogenase, mitochondrial	Homo sapiens	High	17	1497.7	1466.8	1540.3	1458.4	1583.1	1529.4	1478.8	1372	1479.6	1430.7	1530.2
Q9BUT1	BDH2	3-hydroxybutyrate dehydrogenase type 2	Homo sapiens	High	12	935.8	959.5	947.4	885.1	866	700.7	897.3	864.3	1016.9	951.9	844.6
A6H8Y1	BDP1	Transcription factor TFIIIB component B'' homolog	Homo sapiens	Medium	1	32.3	56.6	37.1	33.8	30.8	43.1	33.3	46.5	46.1	45.3	33.9
Q14457	BECN1	Beclin-1	Homo sapiens	High	10	238.5	218.7	238.8	258	255.1	242.1	233.2	252.7	228.7	233.1	249
A8MW95	BECN2	Beclin-2	Homo sapiens	Medium	2	46.8	47	49.4	41.2	46.3	34.1	45.9	37.7	47.4	24.8	45.4
Q5T5X7	BEND3	BEN domain-containing protein 3	Homo sapiens	High	22	834.5	832.2	865.2	910.2	999	986	912.7	981.7	844.8	807	886.5
Q7L4P6	BEND5	BEN domain-containing protein 5	Homo sapiens	High	3	91.1	83.3	97.1	87.7	99.7	89.5	79.7	95.2	94	71.7	89.5
O15155	BET1	BET1 homolog	Homo sapiens	High	2	155.7	143.6	141.9	115	135.7	121	127.9	107.7	141	134.2	118.3
Q9NYM9	BET1L	BET1-like protein	Homo sapiens	High	2	17.6	10.1	17.4	16.9	12.6	6.5	15	13.4	14.1	14.9	15.6
Q6PI77	BHLHB9	Protein BHLHb9	Homo sapiens	High	1	122	136.5	136.4	128	106.7	141.2	117.9	128.5	114.2	118.5	131.1
Q96G01	BICD1	Protein bicaudal D homolog 1	Homo sapiens	High	8	388.9	372.4	398.8	426.5	472.7	405.8	376.2	456.7	363.6	372.7	392.8
Q8TD16	BICD2	Protein bicaudal D homolog 2	Homo sapiens	High	24	1408.4	1426.2	1369.6	1327.7	1538.9	1261	1432.1	1527.7	1315.2	1351.3	1329.7
O00499	BIN1	Myc box-dependent-interacting protein 1	Homo sapiens	High	18	1126.3	1183.1	1175.9	1112.4	1185.8	1091.6	1255.8	1253.8	1192.7	1185.7	1168.2
Q9UBW5	BIN2	Bridging integrator 2	Homo sapiens	High	11	344	340.9	325.7	344.5	302.1	314.4	332.6	374.4	342.7	405.1	331.2
Q9NQY0	BIN3	Bridging integrator 3	Homo sapiens	Medium	1	14.8	9.3	10.8	11.1	13.2	11.5	9.5	10.7	11.9	9	14.3
Q13490	BIRC2	Baculoviral IAP repeat-containing protein 2	Homo sapiens	High	8	316.8	305.4	305.9	325.5	250.5	212.3	289.2	303.5	301.1	278.9	316.9
O15392	BIRC5	Baculoviral IAP repeat-containing protein 5	Homo sapiens	High	6	215.1	206.8	215.2	209	405.7	455.8	235.2	236.7	214.5	209	221.9
Q9NR09	BIRC6	Baculoviral IAP repeat-containing protein 6	Homo sapiens	High	76	3274	3300.9	3255.6	3317	3611.3	3225.3	3508.5	3583.1	3337.7	3287.7	3272.4
P54132	BLM	Bloom syndrome protein	Homo sapiens	High	18	701.4	715.1	707.2	684.2	669.3	610.1	629.5	642.8	711.9	650.4	651.8
Q13867	BLMH	Bleomycin hydrolase	Homo sapiens	High	20	2733.5	2886.6	2711.4	2787.8	2386.9	3308.8	2561	2741.2	2919.7	2798.2	2805.6
P78537	BLOC1S1	Biogenesis of lysosome-related organelles complex 1 subunit 1	Homo sapiens	High	2	114	119.2	118.5	113.7	111.3	95.9	98.2	109.7	99.8	130.9	117.4
Q6QNY1	BLOC1S2	Biogenesis of lysosome-related organelles complex 1 subunit 2	Homo sapiens	High	1	28.5	28.1	31.8	26.5	25.2	22	18.3	26.1	20.9	27.3	31.1
Q6QNY0	BLOC1S3	Biogenesis of lysosome-related organelles complex 1 subunit 3	Homo sapiens	High	4	91.2	96	102.4	101.8	108.6	107	115.6	100.6	101.8	100.6	99
Q9NUP1	BLOC1S4	Biogenesis of lysosome-related organelles complex 1 subunit 4	Homo sapiens	High	6	288	317	293.7	299.5	305.1	259.1	305.6	307.8	295.6	276.9	291.5
Q8TDH9	BLOC1S5	Biogenesis of lysosome-related organelles complex 1 subunit 5	Homo sapiens	High	6	283.1	274.6	270.3	236.4	276.2	253.7	257.6	244.4	274.4	285.7	248.4
Q9UL45	BLOC1S6	Biogenesis of lysosome-related organelles complex 1 subunit 6	Homo sapiens	High	1	13.6	8	13.4	13.8	15.2	8	7.8	13.9	11.6	15.6	13.6
P53004	BLVRA	Biliverdin reductase A	Homo sapiens	High	15	1359.7	1421.7	1333.3	1379.8	1327.9	1272.6	1326.9	1333.4	1450.9	1381.8	1338.5
P30043	BLVRB	Flavin reductase (NADPH)	Homo sapiens	High	3	137.9	128.3	126.5	141.9	167.7	154.7	140.5	140.5	133.2	126	146.1
Q9H2G9	BLZF1	Golgin-45	Homo sapiens	High	4	67.9	64.3	64.6	61.9	62.2	54.6	61.2	55.1	55.6	47	57.9
P35226	BMI1	Polycomb complex protein BMI-1	Homo sapiens	High	6	400.4	368.5	403.6	374.1	338.7	378.5	412.1	372.7	376.5	394.4	398
Q9NSY1	BMP2K	BMP-2-inducible protein kinase	Homo sapiens	High	28	1330.4	1390.1	1389.4	1379.3	1624.5	1565.7	1516.3	1455.8	1350.3	1380.1	1362.2
P36894	BMPR1A	Bone morphogenetic protein receptor type-1A	Homo sapiens	High	2	27.4	25.8	26.9	26.1	23.1	21	24.2	24	24.3	25.3	29.1
Q14692	BMS1	Ribosome biogenesis protein BMS1 homolog	Homo sapiens	High	44	3064.8	2794.1	2955.1	2996.8	1879.8	1373.6	2439.5	2530.6	2841.7	2784.7	2908.1
Q1RMZ1	BMT2	Probable methyltransferase BMT2 homolog	Homo sapiens	High	2	68.5	73.4	66	61.1	58.6	51.8	75.5	82	75.7	62.9	81.5
Q12981	BNIP1	Vesicle transport protein SEC20	Homo sapiens	High	10	549.4	497.9	489.4	434.1	479.6	386.1	407.4	384.5	474.4	438.2	446.7
Q12982	BNIP2	BCL2/adenovirus E1B 19 kDa protein-interacting protein 2	Homo sapiens	High	4	160.1	154.1	161	158.9	172.9	210.1	168.6	160.8	157.4	179.6	163.9
Q12983	BNIP3	BCL2/adenovirus E1B 19 kDa protein-interacting protein 3	Homo sapiens	High	3	154.2	113.3	139.7	166.1	153.3	69.9	126.6	160.4	176.8	113.3	160
Q8NFC6	BOD1L1	Biorientation of chromosomes in cell division protein 1-like 1	Homo sapiens	High	70	2569.4	2614.8	2580.3	2569.3	2552.8	2525.2	2735.3	2705.6	2583.4	2587.6	2659
Q9Y3E2	BOLA1	BolA-like protein 1	Homo sapiens	High	5	193.7	198	192.2	209.6	185	129.7	171.4	167.3	206.9	207.3	197.7
Q9H3K6	BOLA2	BolA-like protein 2	Homo sapiens	High	6	764.8	822.7	829.3	768.4	1014.4	699.7	816.3	673.8	837.2	731.4	924.1
Q53S33	BOLA3	BolA-like protein 3	Homo sapiens	High	5	235.6	256.5	257.9	234	277.2	227.9	231.1	217.7	248.7	204.9	241.4
Q14137	BOP1	Ribosome biogenesis protein BOP1	Homo sapiens	High	37	2940.3	2951	2932.7	2924.6	3176.9	3325.5	3024.3	3311.5	2959.7	2944.2	2889
Q6PGQ7	BORA	Protein aurora borealis	Homo sapiens	High	3	205.2	191.3	195.7	168.9	166.7	111.3	192.8	184.5	179	168.7	208.1
Q969J3	BORCS5	BLOC-1-related complex subunit 5	Homo sapiens	High	5	252.4	205.7	204.4	202.3	218.6	164.8	208.1	172.7	232.9	203.9	234.7
Q96GS4	BORCS6	BLOC-1-related complex subunit 6	Homo sapiens	High	9	309.8	372.4	335	333.1	355.2	321.5	355.5	356.1	337.9	303.8	366.1
Q96FH0	BORCS8	BLOC-1-related complex subunit 8	Homo sapiens	High	1	18.3	19.7	22.6	18.8	16.7	10.5	14.2	12.6	19.3	21.6	17.1
P07738	BPGM	Bisphosphoglycerate mutase	Homo sapiens	High	4	242	210.1	258.2	234.9	228.7	226	281.2	234.2	248.9	241.3	260.1
Q86WA6	BPHL	Valacyclovir hydrolase	Homo sapiens	High	7	633.4	657.9	707.9	702.2	749.3	772.7	658.4	639.6	704.5	638.9	716
O95861	BPNT1	3'(2'),5'-bisphosphate nucleotidase 1	Homo sapiens	High	15	1518.7	1617.2	1540.5	1601.5	1576.1	1631.1	1644.7	1606.3	1616	1466.8	1550.9
Q12830	BPTF	Nucleosome-remodeling factor subunit BPTF	Homo sapiens	High	63	3220.2	3202.5	3199.9	3108.1	2823.8	3152.5	3031.6	2953.7	3168.3	2902.3	3037.6
H7C560	BRAF	Serine/threonine-protein kinase B-raf (Fragment)	Homo sapiens	High	2	83.6	79.1	83.4	91.1	82.6	79.8	83.8	84.1	84.5	77.8	90.5
P15056	BRAF	Serine/threonine-protein kinase B-raf	Homo sapiens	High	7	214.1	212.8	216	243.7	254.1	254.1	220.6	266.5	220.7	228.9	241.8
Q7Z569	BRAP	BRCA1-associated protein	Homo sapiens	High	15	888.4	957.9	913.4	883.8	879.5	755.2	902.9	988.6	911	874.2	911.3
Q6PJG6	BRAT1	BRCA1-associated ATM activator 1	Homo sapiens	High	19	395	412.2	380.7	396.1	590.8	445	474.1	518.4	399.2	406.1	389.1
P38398	BRCA1	Breast cancer type 1 susceptibility protein	Homo sapiens	High	12	346.1	350	353	380.1	391.4	341.4	326.7	379.1	342.9	344.4	397.3
P51587	BRCA2	Breast cancer type 2 susceptibility protein	Homo sapiens	High	14	321.3	320.4	315.5	388.7	263.5	322.5	302.1	340.2	332	340.6	314.6
P46736	BRCC3	Lys-63-specific deubiquitinase BRCC36	Homo sapiens	High	12	1336.9	1329.1	1354.3	1361.6	1408.2	1370.6	1324.1	1386.4	1352.9	1311.6	1294.5
O95696	BRD1	Bromodomain-containing protein 1	Homo sapiens	High	24	991.3	989.9	951.2	954.2	958.9	908.5	967.4	972.1	951.7	910	964
O95696-2	BRD1	Isoform 2 of Bromodomain-containing protein 1	Homo sapiens	High	9	460.5	469.7	455.2	469	487.5	456.1	460.4	473.1	441.6	477.9	475.6
P25440	BRD2	Bromodomain-containing protein 2	Homo sapiens	High	21	1572	1577.8	1558.9	1625	1644.5	1519.4	1633.3	1659.3	1553.8	1431.4	1559.5
Q15059	BRD3	Bromodomain-containing protein 3	Homo sapiens	High	16	1016.4	1029.7	1037.3	1048.1	1036	873.6	1115.6	1083.1	1039.4	1010.7	1005.8
O60885	BRD4	Bromodomain-containing protein 4	Homo sapiens	High	32	2474.4	2452	2372.5	2496.2	2309.6	2249.5	2590.2	2563	2552.9	2512.4	2537.4
Q9NPI1	BRD7	Bromodomain-containing protein 7	Homo sapiens	High	16	469.8	463.2	450.4	476.7	482.2	497.5	489.2	517.8	468.5	426.1	458.1
Q9H0E9-2	BRD8	Isoform 2 of Bromodomain-containing protein 8	Homo sapiens	High	3	13.3	11	14.7	14.1	13	11.4	16.3	13.7	12.7	11.2	14.6
Q9H0E9	BRD8	Bromodomain-containing protein 8	Homo sapiens	High	17	763	783.2	773.4	788.6	858	767.1	765.5	830.8	750.1	729.8	714.5
Q9H8M2	BRD9	Bromodomain-containing protein 9	Homo sapiens	High	5	149.8	141.2	144.7	154.9	150.5	157.4	150.4	156.8	140.3	143.6	169.2
Q9NXR7	BRE	BRCA1-A complex subunit BRE	Homo sapiens	High	14	871.5	893.6	857.7	883.2	867.9	888.7	865	893.5	919.1	891.6	843.2
Q92994	BRF1	Transcription factor IIIB 90 kDa subunit	Homo sapiens	High	11	200.7	208.5	219.1	239.4	208.9	223.4	228	247.7	200.9	228.5	235.9
Q9HAW0	BRF2	Transcription factor IIIB 50 kDa subunit	Homo sapiens	High	2	8.7	12.2	11.4	10.5	8	9.5	11	10.8	14.3	10.3	12.3
Q8WY22	BRI3BP	BRI3-binding protein	Homo sapiens	High	4	399	396.7	384.3	494.7	462.9	560.7	437.2	431.5	384.7	486.9	472.8
J3QSE8	BRIP1	Fanconi anemia group J protein	Homo sapiens	High	3	15.4	15.3	18.3	18.8	14.6	14.4	17.4	16.5	15	21.1	15
Q9BX63	BRIP1	Fanconi anemia group J protein	Homo sapiens	High	20	851.1	829.4	857.6	885.5	819.5	768.6	827.4	829.4	820.8	858.5	943.4
Q8TDN6	BRIX1	Ribosome biogenesis protein BRX1 homolog	Homo sapiens	High	22	1565.6	1605.5	1529.7	1556.9	1606	1305.1	1544.6	1560.7	1598.4	1652	1581
Q8WUW1	BRK1	Protein BRICK1	Homo sapiens	High	4	123.7	122.5	139.5	131.9	122.5	124.7	107.4	142.1	121.2	139.5	132.4
Q9HCU9	BRMS1	Breast cancer metastasis-suppressor 1	Homo sapiens	High	10	398.9	388.2	406.1	434.4	452.8	423.6	404.9	428.8	434.4	410	428.2
Q5PSV4	BRMS1L	Breast cancer metastasis-suppressor 1-like protein	Homo sapiens	High	2	119.4	120	130.6	127.4	124.2	134.5	129.1	127.1	129.7	115.8	124.9
Q5VW32	BROX	BRO1 domain-containing protein BROX	Homo sapiens	High	14	753.6	766.1	761.9	746.4	746.6	661.2	749.4	641.5	706.4	713.5	731.1
P55201	BRPF1	Peregrin	Homo sapiens	High	9	587.7	563.5	593.8	646.5	591.4	727.8	590	650.9	575.4	591	619.1
Q9NSI6	BRWD1	Bromodomain and WD repeat-containing protein 1	Homo sapiens	High	2	125.2	121.7	133.6	132.1	129.9	109.6	113.3	131.8	108.9	110.8	137.8
Q6RI45	BRWD3	Bromodomain and WD repeat-containing protein 3	Homo sapiens	High	1	34.9	34.3	39.5	35.2	35.7	36.6	40.2	37.2	38.2	37.5	41.9
Q9NW68	BSDC1	BSD domain-containing protein 1	Homo sapiens	High	7	379.7	366.6	386.5	341.6	299.4	223.5	349.6	331.6	334.7	300	334
P35613	BSG	Basigin	Homo sapiens	High	11	1326.2	1329.1	1293.2	1420.4	1103.7	1504.6	1227.4	1356	1306.4	1513.6	1351.5
Q5W0U4	BSPRY	B box and SPRY domain-containing protein	Homo sapiens	Medium	1	11.8	11.1	12.9	11.3	10.4	13.1	14.7	10.7	14.9	12	14.9
Q10588	BST1	ADP-ribosyl cyclase/cyclic ADP-ribose hydrolase 2	Homo sapiens	High	1	74.2	82.4	74.8	82.7	100	105.5	76.1	82.9	64.2	59.8	100.2
Q10589	BST2	Bone marrow stromal antigen 2	Homo sapiens	High	6	239.6	240.3	235.3	247.2	253.9	294.6	270.6	264.8	234.3	267.6	260.6
O14981	BTAF1	TATA-binding protein-associated factor 172	Homo sapiens	High	39	1564.5	1562	1575.1	1597.8	1750.3	1772.1	1656.2	1747	1529.3	1603.3	1616.3
Q9H0C5	BTBD1	BTB/POZ domain-containing protein 1	Homo sapiens	High	4	170.2	172.9	183.4	170.9	166.6	146.9	182.8	163	172.6	169.3	201.1
Q9BSF8	BTBD10	BTB/POZ domain-containing protein 10	Homo sapiens	High	2	62.7	67.2	70.5	64.6	67.5	84.3	70.5	70.1	77.8	89.1	71.2
Q9BX70	BTBD2	BTB/POZ domain-containing protein 2	Homo sapiens	High	6	313	297	302.3	356.3	316	239.4	286	335.3	314	350.1	339.8
Q96Q07	BTBD9	BTB/POZ domain-containing protein 9	Homo sapiens	High	3	67	66.7	64.8	69.9	63.5	71.4	80.3	68.3	77.3	56.9	71.9
P20290	BTF3	Transcription factor BTF3	Homo sapiens	High	14	2517.4	2465.7	2373.3	2371.9	2249.6	2442.1	2205.3	2204.3	2343.3	2720.5	2438.5
Q96K17	BTF3L4	Transcription factor BTF3 homolog 4	Homo sapiens	High	7	716.6	595.6	681.3	683.6	620.9	553.8	530.6	516.9	575.6	522.8	669.6
Q14201	BTG3	Protein BTG3	Homo sapiens	Medium	1	12.4	13.3	13.8	14.6	26.8	14.7	16.9	23.6	13.2	14.9	15.6
O00481	BTN3A1	Butyrophilin subfamily 3 member A1	Homo sapiens	High	1	24	24.9	27	28.7	21.3	26.6	24.5	24.9	21.7	26.1	29.2
O00478	BTN3A3	Butyrophilin subfamily 3 member A3	Homo sapiens	High	3	170.3	209.3	201.3	172.7	196.1	173.1	199.5	197.7	204	186.6	188.4
O43683	BUB1	Mitotic checkpoint serine/threonine-protein kinase BUB1	Homo sapiens	High	23	742.1	716.9	741.4	713	1252.4	1279.8	816.5	872.6	702.2	695.6	744.8
O60566	BUB1B	Mitotic checkpoint serine/threonine-protein kinase BUB1 beta	Homo sapiens	High	26	1039.8	1093.6	1038	1013.7	1340.7	1232.3	1055.5	1147.7	1052.2	1095.8	1025.5
O43684	BUB3	Mitotic checkpoint protein BUB3	Homo sapiens	High	15	1997.1	1975.1	2041.7	1932.8	2011.3	2050.5	1943.7	1906.6	1987.5	2009.7	1927.1
Q9BRD0	BUD13	BUD13 homolog	Homo sapiens	High	17	859.1	845.5	860.5	890	846.3	979.7	945.6	955.9	929.5	948.7	874.4
P41223	BUD31	Protein BUD31 homolog	Homo sapiens	High	9	359.7	433.1	428.1	416.9	371.7	267.5	393.2	391.3	439.6	366.4	429.1
Q13895	BYSL	Bystin	Homo sapiens	High	25	2291.2	2268.1	2176.3	2192	2162.8	2143.4	2059.5	2138.3	2135	2285.1	2116.2
Q7L1Q6	BZW1	Basic leucine zipper and W2 domain-containing protein 1	Homo sapiens	High	23	2582	2546.1	2553	2434.1	2532.8	2436.9	2547.9	2441.9	2447.9	2388.9	2460.1
Q9Y6E2	BZW2	Basic leucine zipper and W2 domain-containing protein 2	Homo sapiens	High	32	3983.6	3941.9	3993	3913.9	4009.6	4327.4	3942.7	3929	3892.2	4009	3820.1
Q8N655	C10orf12	Uncharacterized protein C10orf12	Homo sapiens	High	13	388.5	397.4	393.2	406.7	396.7	414.5	429.9	411.1	396.8	391.9	391.1
Q8IYJ2	C10orf67	Uncharacterized protein C10orf67, mitochondrial	Homo sapiens	High	2	28	22.7	27.3	19.1	26	28	28.3	27.5	23.3	24	23.9
Q5T2E6	C10orf76	UPF0668 protein C10orf76	Homo sapiens	High	8	270.4	234.5	256.8	292.1	287.5	247.1	274.6	265.2	223.2	264.9	241.1
Q9H8K7	C10orf88	Uncharacterized protein C10orf88	Homo sapiens	High	7	158.4	165.3	173.5	161.2	167.2	159.7	169.4	180.3	162.4	182.4	172.6
Q9H0W9	C11orf54	Ester hydrolase C11orf54	Homo sapiens	High	9	657.7	766.6	724.8	788.4	805.1	846.7	742	747.9	706.3	713.2	758.3
Q9H3H3	C11orf68	UPF0696 protein C11orf68	Homo sapiens	High	6	554	483.7	531.8	518.4	519.1	383.1	491.5	427.4	457.9	442.1	489.4
Q9BUA3	C11orf84	Uncharacterized protein C11orf84	Homo sapiens	High	8	298.3	318.5	316.8	306.7	267.9	303.3	307.1	326.7	330.2	321.9	324.4
A0A0B4J220	C11orf98	Chromosome 11 open reading frame 48, isoform CRA_c	Homo sapiens	Medium	2	131.1	133.2	131.9	137	142.9	189	148.3	149	144.8	149.1	143.4
E9PRG8	C11orf98	Uncharacterized protein C11orf98	Homo sapiens	High	2	59.7	61.3	63.5	61.9	69.8	80.4	60.3	60.1	60.6	59.4	57.9
Q9HB07	C12orf10	UPF0160 protein MYG1, mitochondrial	Homo sapiens	High	16	786.4	771.4	792.9	770.4	875.7	859.8	763.8	792.8	802.1	778.5	789.1
Q8N999	C12orf29	Uncharacterized protein C12orf29	Homo sapiens	High	12	1059.5	1089.7	1028.7	1041.4	1108	1278.5	1192.6	1112.2	1163.8	1035.1	1069.2
Q9NQ89	C12orf4	Protein C12orf4	Homo sapiens	High	5	82.1	88.4	87.1	93.3	83.9	93.1	86.3	99.1	88.2	86	96.7
Q96C57	C12orf43	Uncharacterized protein C12orf43	Homo sapiens	High	8	302.8	296.8	327.1	309.3	294.5	283.6	302.7	310.5	303.3	318.2	307.5
Q8N5I9	C12orf45	Uncharacterized protein C12orf45	Homo sapiens	High	9	1283.4	1232.6	1278.7	1298	1241.8	1267.8	1315	1298.5	1292.5	1272.4	1293.8
Q99622	C12orf57	Protein C10	Homo sapiens	High	3	72.5	73.4	72.6	82.3	75.5	84.2	83.4	85.7	66.8	98.8	74
Q9H3J6	C12orf65	Probable peptide chain release factor C12orf65, mitochondrial	Homo sapiens	High	4	96.5	93	97.7	93.8	120.1	100.3	101.6	92.2	89.3	78.6	89
Q96MD2	C12orf66	UPF0536 protein C12orf66	Homo sapiens	High	3	167.9	151	165.7	163	189.6	187.7	163.3	166.9	152.3	162.9	164.7
Q69YU5	C12orf73	Uncharacterized protein C12orf73	Homo sapiens	High	1	25.2	27.3	26.1	24.4	22.2	20	20.1	19.9	18.9	17.7	23
Q9UKR5	C14orf1	Probable ergosterol biosynthetic protein 28	Homo sapiens	High	3	166.6	146.5	152.1	174	170.4	151.5	124.6	125.5	150.8	177.5	141.3
Q9BXV9	C14orf142	Uncharacterized protein C14orf142	Homo sapiens	High	3	47.3	46.6	44.3	44.4	44.1	39.7	35.2	42.7	33.7	46.6	46.1
Q7Z3D6	C14orf159	UPF0317 protein C14orf159, mitochondrial	Homo sapiens	High	14	1253	1248.2	1250.2	1173.9	1317.6	1101.2	1222.5	1150.8	1226.4	1142.6	1217.8
Q7Z3D6-2	C14orf159	Isoform 2 of UPF0317 protein C14orf159, mitochondrial	Homo sapiens	Medium	1	47	35.7	40.2	42.5	63.3	37.5	67.2	38.9	39.5	49.1	46.4
Q9Y224	C14orf166	UPF0568 protein C14orf166	Homo sapiens	High	17	2418.5	2161.9	2197	1978.2	2395.9	1686.8	1838.7	1836.8	1864.6	2215.9	1994.4
Q86SX3	C14orf80	Uncharacterized protein C14orf80	Homo sapiens	High	5	161.6	167.3	169.6	169.3	201.2	180	172	171.8	169.4	171.3	162
Q6ZRI6	C15orf39	Uncharacterized protein C15orf39	Homo sapiens	High	2	44.1	47.5	42.3	44.2	46.6	47.4	48.4	46.9	40.3	42.1	49.3
Q8WUR7	C15orf40	UPF0235 protein C15orf40	Homo sapiens	High	3	124.2	115.2	114.6	101	96	97.8	104.3	93.5	115.7	117.6	106.1
Q9Y2V0	C15orf41	Uncharacterized protein C15orf41	Homo sapiens	High	2	17.5	15.1	19	18.6	14.6	19.5	15.1	21.9	16.4	19.4	21.4
Q9BV29	C15orf57	Uncharacterized protein C15orf57	Homo sapiens	High	3	153.8	160.8	155.7	159	208.7	129.9	161.8	168.5	171.9	175.8	176.6
Q96S19	C16orf13	UPF0585 protein C16orf13	Homo sapiens	High	10	785.3	742.8	761.4	785	881.6	740.6	758.5	728.7	792.9	728.2	785
Q96GQ5	C16orf58	RUS1 family protein C16orf58	Homo sapiens	High	15	841.1	834.9	834.5	904.1	917.4	909.6	885.7	896.2	841.8	862.4	885.6
Q7L2K0	C16orf59	Uncharacterized protein C16orf59	Homo sapiens	High	2	49.6	50.7	51.8	52.4	46.5	45.4	47.6	51.6	50.1	43.5	54.5
Q7Z3J2	C16orf62	UPF0505 protein C16orf62	Homo sapiens	High	16	678.4	654.4	652	661.2	675.8	669	652.2	706.2	633.3	673.6	667.8
Q9BSU1	C16orf70	UPF0183 protein C16orf70	Homo sapiens	High	2	165.9	227.2	225	229.6	238.9	209.7	257.6	245.4	238.4	227.8	237.6
Q6PH81	C16orf87	UPF0547 protein C16orf87	Homo sapiens	High	4	171.4	178.8	180.8	184.9	163.4	214.4	188.2	196.4	205.9	173.6	183.9
H3BQL3	C16orf87	UPF0547 protein C16orf87 (Fragment)	Homo sapiens	High	3	93.7	89.7	79.9	94.2	112.7	87.3	91.9	128.2	89.7	102.1	94.2
Q8N3J3	C17orf53	Uncharacterized protein C17orf53	Homo sapiens	Medium	1	49.2	47.7	46.5	38.1	35.6	34.2	40.4	43.3	49.6	46.5	38.1
Q9BQA9	C17orf62	Uncharacterized protein C17orf62	Homo sapiens	High	7	376.8	352.6	357.9	487	378.5	488	368	395.1	373.4	473	434.3
Q9HAS0	C17orf75	Protein Njmu-R1	Homo sapiens	High	12	660.3	664.4	646.9	711.9	753.2	691.9	759.4	755.9	654.9	674.1	672.5
Q9BSJ5	C17orf80	Uncharacterized protein C17orf80	Homo sapiens	High	10	415.1	420	422.5	392.5	459.3	412.4	460	454	437.6	419.4	435.4
Q32NC0	C18orf21	UPF0711 protein C18orf21	Homo sapiens	High	3	209.7	193.3	189.5	186.2	147.3	154.4	169.7	176.7	185.1	171.8	181.7
Q96B23	C18orf25	Uncharacterized protein C18orf25	Homo sapiens	High	8	308.6	335.5	306.1	308.4	237.2	272.7	308.3	296.1	358.4	344.6	288.6
Q96B23-2	C18orf25	Isoform 2 of Uncharacterized protein C18orf25	Homo sapiens	High	1	48	50	54.6	62.7	45.2	60.8	50.9	50.9	56	55.4	54.9
Q8TCD1	C18orf32	UPF0729 protein C18orf32	Homo sapiens	High	1	22.3	25.3	25.6	28.1	27.7	33.2	19.8	20.8	20	21.7	24.4
Q96DM3	C18orf8	Uncharacterized protein C18orf8	Homo sapiens	High	15	908.2	923.2	862.8	949	915.6	973.2	858.6	967.4	882.7	863.6	929.7
Q9NSK7	C19orf12	Protein C19orf12	Homo sapiens	High	1	13	8.8	8.8	8.1	13.8	13.4	11.2	12	9.9	13.5	11.6
Q9BQ61	C19orf43	Uncharacterized protein C19orf43	Homo sapiens	High	12	926.2	894	834.2	791.3	689.7	719.9	661.2	753.5	777.7	946.5	765.8
Q8N9M1	C19orf47	Uncharacterized protein C19orf47	Homo sapiens	High	10	517.8	515.9	550.2	536.7	465	410.9	537.1	496.1	512.9	491.3	515.8
Q9BSF4	C19orf52	Uncharacterized protein C19orf52	Homo sapiens	High	6	247.6	232.4	253.8	244.6	268.4	217.8	227.9	211.5	228.9	227.4	239.2
Q9UNZ5	C19orf53	Leydig cell tumor 10 kDa protein homolog	Homo sapiens	High	11	1549.8	1456.1	1468.8	1824.1	1283.6	1401.5	1545.2	1721	1440.4	2030.2	1658.7
Q13901	C1D	Nuclear nucleic acid-binding protein C1D	Homo sapiens	High	2	69.8	77.3	58.3	58.6	53.2	62.1	52.1	58.5	71.1	80.5	60.9
Q9NS00	C1GALT1	Glycoprotein-N-acetylgalactosamine 3-beta-galactosyltransferase 1	Homo sapiens	High	4	240	225.2	226.4	272.6	268.3	250.8	251.5	224.2	246	236.1	263.1
Q96EU7	C1GALT1C1	C1GALT1-specific chaperone 1	Homo sapiens	High	6	120.8	121.7	114.3	128	127	145.9	113.8	130.4	125.7	127.5	144.3
Q9NX04	C1orf109	Uncharacterized protein C1orf109	Homo sapiens	Medium	1	29.4	27.8	23.6	21.7	30.8	21.9	23.1	17.1	22.9	22.4	25.5
Q9NSG2	C1orf112	Uncharacterized protein C1orf112	Homo sapiens	High	7	209.6	193.4	219.4	239.9	275.4	213.3	235.1	245.1	176.1	218.6	199.4
Q6ZSJ8	C1orf122	Uncharacterized protein C1orf122	Homo sapiens	High	2	69.9	66.2	62.8	67	75.5	59.7	62.7	70.1	55.3	72.7	64
Q9NWV4	C1orf123	UPF0587 protein C1orf123	Homo sapiens	High	8	911.8	888.5	881.9	880.7	876.8	871.3	863.3	827.8	912.9	826.1	859.3
Q8NDD1	C1orf131	Uncharacterized protein C1orf131	Homo sapiens	High	13	786.1	789.3	771.9	728.8	603.4	544.7	752.1	745.5	821.1	754.4	756.7
Q96HA4	C1orf159	Uncharacterized protein C1orf159	Homo sapiens	High	1	28.2	30.7	27.8	25.5	26.6	27.4	27.9	22.1	28.4	30.3	29.8
Q5SNV9	C1orf167	Uncharacterized protein C1orf167	Homo sapiens	Medium	1	119.3	98.9	150.7	108.5	89.1	92.2	89.5	85.7	88	68	118.4
Q8IYL3	C1orf174	UPF0688 protein C1orf174	Homo sapiens	High	6	306.6	317.5	306.2	283.9	270.7	339.4	301.7	320.8	297.7	306.6	293
Q6ZWK4	C1orf186	Uncharacterized protein C1orf186	Homo sapiens	High	4	171.8	171.9	160.6	168.9	153.8	178	161.1	200.8	170.4	179.6	165
Q9H425	C1orf198	Uncharacterized protein C1orf198	Homo sapiens	High	5	169.3	176.3	159.1	162.3	143.4	124	150.4	165.4	173.6	163.3	176.9
Q9BWL3	C1orf43	Uncharacterized protein C1orf43	Homo sapiens	High	2	54.8	63.3	51	76.1	44.3	61.2	49	74.5	47.1	77.7	61.9
Q9BV19	C1orf50	Uncharacterized protein C1orf50	Homo sapiens	High	3	115.6	127.4	126.4	110.3	90.9	115.2	82.7	89.5	123.2	114.3	142.5
Q8N6N3	C1orf52	UPF0690 protein C1orf52	Homo sapiens	High	6	432.1	406.9	415.2	434.7	422.6	500.6	450.4	481.5	464.6	443.4	396.3
Q07021	C1QBP	Complement component 1 Q subcomponent-binding protein, mitochondrial	Homo sapiens	High	11	2012.6	2056.9	2198.4	2137	1939.7	2701.8	2109.9	2136.9	2183.5	1972	2116.8
Q9BUV8	C20orf24	Uncharacterized protein C20orf24	Homo sapiens	High	3	242.3	234.3	231.1	199.3	213.2	228.6	190.2	179.7	210.5	212.7	189.5
Q9GZN8	C20orf27	UPF0687 protein C20orf27	Homo sapiens	High	5	529.4	513.4	569	561	681	652.4	548.2	545.2	574.7	525.8	551.8
P30042	C21orf33	ES1 protein homolog, mitochondrial	Homo sapiens	High	12	917.4	982.3	918.6	924.8	875.2	1101.7	956.6	908.1	980	972.9	945.4
P57076	C21orf59	UPF0769 protein C21orf59	Homo sapiens	High	14	768.2	709.2	754.1	811.2	767.7	709.3	717	671.4	671.8	662	750.2
O14523	C2CD2L	C2 domain-containing protein 2-like	Homo sapiens	High	3	28.8	42.3	37.5	47	56.8	33.9	35.8	47.1	33.1	32.7	43.1
Q4AC94	C2CD3	C2 domain-containing protein 3	Homo sapiens	High	5	167.4	155.7	165.3	148.8	124.6	122.4	135.1	139	163.2	140.8	160.7
Q86YS7	C2CD5	C2 domain-containing protein 5	Homo sapiens	High	29	1387.8	1388.8	1406	1429.8	1434.6	1313.7	1488.5	1435.8	1356.7	1364.6	1412.9
Q86YS7-5	C2CD5	Isoform 5 of C2 domain-containing protein 5	Homo sapiens	High	6	26.7	27.2	26.7	21.4	29.5	24.9	23.6	24.1	20.8	27.4	27.7
Q8WWC4	C2orf47	m-AAA protease-interacting protein 1, mitochondrial	Homo sapiens	High	9	888.5	780.1	807.3	785.7	828.5	823.3	804.6	696.9	878	743.2	788.9
Q9BVC5	C2orf49	Ashwin	Homo sapiens	High	6	403	371.6	409	363.7	339.1	338.1	377.4	364.1	391.8	356.8	389.1
Q2NKX9	C2orf68	UPF0561 protein C2orf68	Homo sapiens	High	1	41.3	34.6	45	38.3	35.3	28.6	39.2	35.4	39.2	33	38.3
Q8N8R5	C2orf69	UPF0565 protein C2orf69	Homo sapiens	High	7	210.3	214.1	220.6	243.6	281.9	255.6	237.7	265.7	222.3	201.4	237.9
A6NCS6	C2orf72	Uncharacterized protein C2orf72	Homo sapiens	High	1	59.5	46	52.8	50.2	50.9	49.6	38.9	42.5	37.8	41.7	41.8
Q3KRA6	C2orf76	UPF0538 protein C2orf76	Homo sapiens	High	4	167.1	172.8	155.9	150.2	161.8	146	135.7	129.6	175.1	137.5	171.8
P01024	C3	Complement C3	Homo sapiens	High	5	223.4	219.5	196.1	315.4	359.2	362	291	225.8	243.2	319.2	240.8
Q6P1S2	C3orf33	Protein C3orf33	Homo sapiens	High	2	42.5	46.7	38.9	34.9	39.8	39.8	42.8	40.1	39.9	40.5	45.1
Q5JPI3	C3orf38	Uncharacterized protein C3orf38	Homo sapiens	High	8	337.2	321.1	335.2	371.1	358.5	361.5	324.9	346.6	331.9	341.2	340.3
Q8NDZ4	C3orf58	Deleted in autism protein 1	Homo sapiens	High	5	219.6	246.6	223.7	268.8	231.1	262.2	225.5	230.8	244.2	253.8	269.1
P0C0L4	C4A	Complement C4-A	Homo sapiens	High	4	85	84.8	86.8	127.4	184.1	119.9	115.3	111.5	81.2	100.5	103.4
Q8WVX3	C4orf3	Uncharacterized protein C4orf3	Homo sapiens	High	1	18	14.4	23.5	19.1	18.4	23.6	20.2	19.2	17.8	22.5	22.4
Q8N8J7	C4orf32	Uncharacterized protein C4orf32	Homo sapiens	High	4	66.1	60	54.4	59.5	61.1	70.3	64.7	61.7	58.4	58.1	62.7
Q8N1A6	C4orf33	UPF0462 protein C4orf33	Homo sapiens	High	2	56.2	56.3	59	56.5	54.7	58.5	50.2	55.3	55	55.8	58.1
Q49AR2	C5orf22	UPF0489 protein C5orf22	Homo sapiens	High	11	551.3	569.1	580.4	552.6	633.5	534.8	633	619.4	575.6	470.8	521.2
Q7Z6I8	C5orf24	UPF0461 protein C5orf24	Homo sapiens	High	4	279.6	265.4	258.7	282.8	207.7	159.1	228.6	236	294	298.2	292.6
Q96GV9	C5orf30	UNC119-binding protein C5orf30	Homo sapiens	High	2	50.2	43.4	53.9	51.3	76.1	47.5	54.5	44.5	41.9	50.6	47.7
Q96MH7	C5orf34	Uncharacterized protein C5orf34	Homo sapiens	Medium	1	22.4	29	25.8	22	25.9	19.2	22.4	25.7	22.7	25.9	23.2
A6NDU8	C5orf51	UPF0600 protein C5orf51	Homo sapiens	High	7	137.4	171.5	167.8	175.2	168	142.8	171.3	184.3	164.6	145.5	172.1
Q9H6K1	C6orf106	Uncharacterized protein C6orf106	Homo sapiens	High	4	139	136.9	147.1	140.5	79	72.9	131.1	119	146.1	130.6	134.9
Q7Z4R8	C6orf120	UPF0669 protein C6orf120	Homo sapiens	High	1	40.9	30.6	38.6	36.5	39.4	31	33.7	37.5	33.8	30.6	31.8
Q9P0P8	C6orf203	Uncharacterized protein C6orf203	Homo sapiens	High	3	286.5	242	277.4	340	225.7	325.2	216.1	262.7	209.7	245.4	251.5
O95873	C6orf47	Uncharacterized protein C6orf47	Homo sapiens	High	5	147.1	136.4	148.1	156.7	137.5	137.3	128.9	157	134.6	152.6	157.5
Q6UWU4	C6orf89	Bombesin receptor-activated protein C6orf89	Homo sapiens	High	2	93.1	95	87.2	89.3	98.2	85.8	92.9	96.4	89.1	88.6	100.8
Q9BPX7	C7orf25	UPF0415 protein C7orf25	Homo sapiens	High	9	428.4	442.9	425.2	440.7	473.2	452.2	414	424.6	421.1	420.2	444
Q96N11	C7orf26	Uncharacterized protein C7orf26	Homo sapiens	High	6	102	128	104.6	125	167.3	140.3	153.8	136.8	116.7	123.3	115.5
Q8WVR3	C7orf43	Uncharacterized protein C7orf43	Homo sapiens	Medium	1	78.1	77	81.8	71.7	70.5	71.2	77.5	69.2	72.6	78.4	81.1
Q9BRJ6	C7orf50	Uncharacterized protein C7orf50	Homo sapiens	High	11	1248.9	1269.3	1313	1314.1	1226.9	1500	1248.4	1257.4	1308.6	1349.7	1321.8
Q96HJ9	C7orf55	UPF0562 protein C7orf55	Homo sapiens	High	2	48.3	49.5	48.9	52.4	42	49.3	55	54.9	56.8	49.1	56.9
Q9H7E9	C8orf33	UPF0488 protein C8orf33	Homo sapiens	High	7	338.8	306	334.6	306.8	373.9	356	295.4	286.4	299.2	296.1	325.1
Q8N0T1	C8orf59	Uncharacterized protein C8orf59	Homo sapiens	High	5	489.2	462	454.9	465.7	550.7	603.7	448.8	477.3	455.9	518.8	486.1
Q6P1X6	C8orf82	UPF0598 protein C8orf82	Homo sapiens	High	6	308.2	309.6	323.9	304	357.7	279.2	309.1	269.7	302.5	275.6	322.8
Q5T280	C9orf114	Putative methyltransferase C9orf114	Homo sapiens	High	10	377.2	402	406	429	444.5	446.7	472.5	459.1	413.6	393.1	409.2
Q9BUH6	C9orf142	Protein PAXX	Homo sapiens	High	10	660	602.1	619.1	596.8	644.6	550.1	544.9	551.6	601.9	537.9	602.8
H0YCM2	C9orf3	Aminopeptidase O (Fragment)	Homo sapiens	Medium	2	25.9	22.3	25	23.3	26.5	25	18.9	23.5	21.4	17.5	22.7
Q8IXQ3	C9orf40	Uncharacterized protein C9orf40	Homo sapiens	High	4	179	174.8	161.2	164	186.1	142.4	166.2	182.1	160.7	139.5	164.5
Q5T6V5	C9orf64	UPF0553 protein C9orf64	Homo sapiens	High	13	819.4	803.9	792.5	837.5	797.1	808.8	727.5	727.7	756.5	728.6	796.5
Q96LT7	C9orf72	Protein C9orf72	Homo sapiens	High	2	82.1	90.7	88.1	92.7	85.3	89.7	95.4	78.3	85	92.4	101.7
Q9NZ63	C9orf78	Uncharacterized protein C9orf78	Homo sapiens	High	23	2412.3	2449.3	2301	2251	2078	2548.5	2161.6	2514.5	2546.5	2365.4	2307.5
P35219	CA8	Carbonic anhydrase-related protein	Homo sapiens	High	6	436.3	490.5	421.9	454.9	391.5	538.6	411.7	489.6	603.8	526.1	423.9
Q16790	CA9	Carbonic anhydrase 9	Homo sapiens	High	4	98.4	106.3	104.5	93.8	66.4	57	104.7	84	129.1	90.1	83.4
Q9H8G2	CAAP1	Caspase activity and apoptosis inhibitor 1	Homo sapiens	High	3	100.4	116.7	113.6	106.7	94	85.7	100.2	104.5	119.4	113.1	112.3
Q9Y376	CAB39	Calcium-binding protein 39	Homo sapiens	High	22	2099	1958.8	1865.4	1887.6	1876.2	1662.8	1766	1683.8	1833.9	1837	1984.3
Q9Y6J0	CABIN1	Calcineurin-binding protein cabin-1	Homo sapiens	High	28	1113.3	1121.4	1119.9	1099.4	984	930.7	1073.9	1025.7	1042.2	989.1	1046
Q9BTV7	CABLES2	CDK5 and ABL1 enzyme substrate 2	Homo sapiens	High	2	58.2	71.2	73.7	72.7	56.3	39.1	74.2	72.4	64.4	61.4	61.5
A0A1B0GW24	CABP2	Calcium-binding protein 2	Homo sapiens	High	3	17.6	16.1	16.8	21.1	28.6	21.3	21.3	21.8	15.9	12.3	22.5
A0A087WW63	CACNA1A	Voltage-dependent P/Q-type calcium channel subunit alpha	Homo sapiens	High	1	10.7	13.2	11.8	11.5	9.4	6.7	12.1	13	12.6	14.9	8.9
P54289	CACNA2D1	Voltage-dependent calcium channel subunit alpha-2/delta-1	Homo sapiens	High	2	60	55.3	46.4	48.1	64.9	79.6	46.8	64.1	47.6	72.8	79.7
P54284	CACNB3	Voltage-dependent L-type calcium channel subunit beta-3	Homo sapiens	High	1	172.3	195.1	190.8	156.5	72.8	159.7	141.2	142.8	170.6	136.3	175.6
Q8WUQ7	CACTIN	Cactin	Homo sapiens	High	21	1035.2	997.4	1041.5	1006.6	983	1078.7	1024.1	1080.8	1044.5	1070.8	1057.2
Q86Y37	CACUL1	CDK2-associated and cullin domain-containing protein 1	Homo sapiens	High	7	373.4	411.6	336.7	370	388.2	368.5	345.8	383	437.7	414.8	374.8
Q9HB71	CACYBP	Calcyclin-binding protein	Homo sapiens	High	24	5810.2	6108.4	5778.6	5640.7	4705.2	6366.6	5582.3	5614.3	6327.9	6035.2	5951.6
P27708	CAD	CAD protein	Homo sapiens	High	87	7342.9	7585.7	7438.1	7482.6	8080.6	7872.6	7437.3	7504.4	7446.7	7350.6	7346.1
Q9P1Z2	CALCOCO1	Calcium-binding and coiled-coil domain-containing protein 1	Homo sapiens	High	3	77.2	74	77.2	81.3	81.5	77.1	86.2	106.4	76.2	95.7	72
Q13137	CALCOCO2	Calcium-binding and coiled-coil domain-containing protein 2	Homo sapiens	High	16	670.9	686.8	677.6	626.4	817.7	815.3	706.8	661.6	610.8	562.9	641.3
Q05682	CALD1	Caldesmon	Homo sapiens	High	3	89.1	87.5	83.6	105.6	79	68.8	126.2	104.3	110.7	77.1	66.4
P62158	CALM1	Calmodulin	Homo sapiens	High	10	871.2	800.2	670	890.5	543.4	655.9	522.1	843.7	561	904.8	615.8
Q9NZT1	CALML5	Calmodulin-like protein 5	Homo sapiens	High	1	10.5	13.3	17.8	6.6	17.3	16.6	11.6	8.3	9.8	48.1	9.2
P27797	CALR	Calreticulin	Homo sapiens	High	39	9222.1	9085.9	9494.7	9754.5	8157	10730	9476.6	9158.8	9376.1	9307.6	9405.6
O43852-4	CALU	Isoform 4 of Calumenin	Homo sapiens	Medium	3	251.4	286.2	272.3	276.3	238.7	275.6	239.1	221.2	287.2	231.5	255.2
O43852	CALU	Calumenin	Homo sapiens	High	24	2211.4	2114.6	2265	2460.2	2023.2	2516.4	2112.1	2112.6	2141.9	2111.7	2199
Q8IU85	CAMK1D	Calcium/calmodulin-dependent protein kinase type 1D	Homo sapiens	High	4	148.1	152.5	154.7	141.1	129.9	151.1	151.9	131.7	141.5	152	165.9
Q13554	CAMK2B	Calcium/calmodulin-dependent protein kinase type II subunit beta	Homo sapiens	High	1	18.8	25.1	31.2	31.4	44.2	26.4	31.5	32.1	34	29.6	24.6
Q13557	CAMK2D	Calcium/calmodulin-dependent protein kinase type II subunit delta	Homo sapiens	High	10	631	628.8	663.6	640.8	687	643.4	639.9	586.3	647.8	633.7	655.7
Q13555	CAMK2G	Calcium/calmodulin-dependent protein kinase type II subunit gamma	Homo sapiens	High	9	1198.2	1221	1203	1133.7	1098.5	1167.1	1096.7	1118.6	1250	1165.3	1156.9
Q8N5S9	CAMKK1	Calcium/calmodulin-dependent protein kinase kinase 1	Homo sapiens	High	2	59.9	58.3	51.9	68.8	60.5	57.2	62.5	71.9	57.4	72.4	60.7
Q96RR4	CAMKK2	Calcium/calmodulin-dependent protein kinase kinase 2	Homo sapiens	High	5	289.3	269.4	266	246.8	229.3	214.3	239.7	255.7	263.9	262.5	266.9
Q8NCB2	CAMKV	CaM kinase-like vesicle-associated protein	Homo sapiens	High	6	156.2	150.6	149.2	140	195.2	216.9	166.5	156.8	153.8	141.4	146.5
P49069	CAMLG	Calcium signal-modulating cyclophilin ligand	Homo sapiens	High	6	185.8	202.4	185.5	205.2	198	185.4	206.8	210.4	196.8	200.1	221
Q5T5Y3	CAMSAP1	Calmodulin-regulated spectrin-associated protein 1	Homo sapiens	High	31	1250.8	1244.7	1266.8	1320.7	1161.1	1112.5	1265.2	1341.6	1202.4	1230.2	1293.8
Q08AD1	CAMSAP2	Calmodulin-regulated spectrin-associated protein 2	Homo sapiens	Medium	1	55	59.6	65.4	54.6	55.1	47.7	53.4	62.2	65.5	62.8	62.4
Q86VP6	CAND1	Cullin-associated NEDD8-dissociated protein 1	Homo sapiens	High	57	7167.8	7184.4	7210.1	7589.2	7455.5	7288	7447.3	7439.9	7228.4	7374	6980.1
O75155	CAND2	Cullin-associated NEDD8-dissociated protein 2	Homo sapiens	High	1	96.2	84.7	83.2	126.7	93.1	84	83.4	112.6	87.3	144.5	102.3
Q8WVQ1	CANT1	Soluble calcium-activated nucleotidase 1	Homo sapiens	High	9	596.2	583.6	591.9	653.3	656.2	669.5	595.9	635.5	605.3	559.1	657.1
P27824	CANX	Calnexin	Homo sapiens	High	40	6098.3	6230.7	6172.2	6434.7	5674.2	7295.2	6253.1	6418.1	6249.1	6390.7	6139.4
Q01518-2	CAP1	Isoform 2 of Adenylyl cyclase-associated protein 1	Homo sapiens	High	6	1837.1	1846	1837.6	1776.5	1806.2	1791.8	1866.2	1778.2	1927.6	1750	1830.2
Q01518	CAP1	Adenylyl cyclase-associated protein 1	Homo sapiens	High	30	3754.1	4036.9	3912.2	3898	3909.7	3856.7	4361.4	4099.2	4049.7	3894.1	4052.9
P40123	CAP2	Adenylyl cyclase-associated protein 2	Homo sapiens	High	2	91.7	92.2	85.1	102.4	98.9	137.2	109.4	108.5	94.2	126.5	130.6
P40121	CAPG	Macrophage-capping protein	Homo sapiens	High	13	768.8	768.9	744.3	757.7	663.7	844.9	728.5	675.3	795.3	710.7	719.3
P07384	CAPN1	Calpain-1 catalytic subunit	Homo sapiens	High	39	2587.4	2616.6	2683.6	2910	2894.9	2795.4	2734	2666.9	2544.6	2606	2762.9
P17655	CAPN2	Calpain-2 catalytic subunit	Homo sapiens	High	3	59.5	77	62	64.3	69.6	83.7	81.5	53.4	90.1	58.9	89
O15484	CAPN5	Calpain-5	Homo sapiens	Medium	1	22.6	14.5	22.4	17.3	14.7	30.5	18	17.6	12.4	14.9	27.3
Q9Y6W3	CAPN7	Calpain-7	Homo sapiens	High	15	663.1	663.2	638.8	681.9	731.7	731.1	710.6	814.2	651.6	679.1	684.8
P04632	CAPNS1	Calpain small subunit 1	Homo sapiens	High	11	682.9	686.5	655.4	667.7	620.8	618.8	590.5	610.7	683	713.4	655.4
K7ES78	CAPNS1	Calpain small subunit 1 (Fragment)	Homo sapiens	High	1	89.4	87.6	86.3	84.9	97.3	87.4	96	81.7	81.4	74.9	88.2
Q14444	CAPRIN1	Caprin-1	Homo sapiens	High	21	2799.2	2929.6	2843.8	2520.6	2478.8	1777.6	2782.6	2871.3	2773.7	2865.7	2779.8
P52907	CAPZA1	F-actin-capping protein subunit alpha-1	Homo sapiens	High	11	1708	1762.6	1773.8	1648.8	1661.3	1741.9	1663	1663.5	1799.2	1626.5	1755
P47755	CAPZA2	F-actin-capping protein subunit alpha-2	Homo sapiens	High	9	668.5	745.5	686.1	660.1	770	597.9	728.7	698.3	736	667	745.6
P47756	CAPZB	F-actin-capping protein subunit beta	Homo sapiens	High	21	3842.3	3799.5	3914.7	3646.8	3691.4	3449.2	3769.2	3645.8	3891.3	4024.1	3864.1
Q9BXL7	CARD11	Caspase recruitment domain-containing protein 11	Homo sapiens	Medium	1	24	24	24	20.8	21.8	27.1	17.2	24.8	28.2	22.3	21.5
Q96LW7	CARD19	Caspase recruitment domain-containing protein 19	Homo sapiens	High	2	109.1	89.7	108.6	94.5	111.4	86.8	95.9	93.4	93.4	81.1	96.9
Q96LW7-2	CARD19	Isoform 2 of Caspase recruitment domain-containing protein 19	Homo sapiens	High	2	26.8	25.4	25.7	25.9	26.7	23.7	29.1	33.2	24.6	27.8	26.3
Q9Y2G2	CARD8	Caspase recruitment domain-containing protein 8	Homo sapiens	Medium	1	11.4	15.2	12.2	10.8	13.9	17.8	14.8	16.6	8.1	14.3	15.8
Q9Y2V2	CARHSP1	Calcium-regulated heat-stable protein 1	Homo sapiens	High	7	834.5	829.3	809.8	823.8	769.1	768.2	801.5	788.5	835	774.5	872.2
Q86X55	CARM1	Histone-arginine methyltransferase CARM1	Homo sapiens	High	18	1355.7	1408	1374.3	1416.6	1449.9	1533.6	1334.3	1464.9	1453.1	1381.7	1411.7
Q6F5E8	CARMIL2	Capping protein, Arp2/3 and myosin-I linker protein 2	Homo sapiens	High	24	659.2	653.4	647.1	627.2	762.3	592.9	711.8	721.4	595.7	616.7	639.1
Q8N4J0	CARNMT1	Carnosine N-methyltransferase	Homo sapiens	High	13	642.4	621.6	639	659.6	649.6	727.3	637	643.7	621.2	643.7	654.8
P49589	CARS	Cysteine--tRNA ligase, cytoplasmic	Homo sapiens	High	46	3267.9	3409.2	3280.3	3078.9	3026.2	3250.2	3345.4	3239.3	3231.5	3324.2	3194.6
P49589-3	CARS	Isoform 3 of Cysteine--tRNA ligase, cytoplasmic	Homo sapiens	High	16	838.6	892.6	889.4	914.5	883	931.5	859.8	954.3	857.4	812.2	868.3
Q9HA77	CARS2	Probable cysteine--tRNA ligase, mitochondrial	Homo sapiens	High	17	1066.8	978.4	1012.8	1078.7	1249.8	1177.8	1109.2	1007.7	988.7	1005.7	1031.1
O15234	CASC3	Protein CASC3	Homo sapiens	High	13	1019.8	985.1	993.1	952.1	1105.9	1318.3	1059.3	986.4	958.5	910.3	954.6
Q6P4E1	CASC4	Protein CASC4	Homo sapiens	High	3	38	30.6	51	39.4	43.4	33.7	37.7	31.2	33.4	24.3	37.3
Q8NG31	CASC5	Protein CASC5	Homo sapiens	High	43	1738.5	1713.4	1702	1673.2	2029.4	2052.9	1778.6	1855.5	1704.2	1643	1691.2
P31944	CASP14	Caspase-14	Homo sapiens	High	7	369.2	428.1	466.3	307.1	378.1	676.8	306.1	278.2	301.8	432.4	313.1
P42575	CASP2	Caspase-2	Homo sapiens	High	14	891	918.2	900.2	853	941.5	716.9	912.2	849.8	905.9	823.9	936
P42574	CASP3	Caspase-3	Homo sapiens	High	15	1735.8	1786	1775	1885.3	1906.9	1728.1	1753.7	1907.5	1797.3	1799.9	1842.5
P55212	CASP6	Caspase-6	Homo sapiens	High	7	712.7	751.5	757.8	794	667.4	695.2	680.2	703	682.8	726.9	760.7
P55210	CASP7	Caspase-7	Homo sapiens	High	11	781	781.8	815.4	806.1	733.5	825.8	796	757.4	803.9	747.2	792.2
Q14790	CASP8	Caspase-8	Homo sapiens	High	16	616	602.4	639.6	689.9	689.2	647.8	644.2	690.4	604.7	658.9	674
Q9UKL3	CASP8AP2	CASP8-associated protein 2	Homo sapiens	High	25	1036.4	1040.8	1002.7	1112.7	852.1	693	925.9	999	1015.4	1194.3	1112.3
P55211	CASP9	Caspase-9	Homo sapiens	High	2	35.4	35.9	34	44.8	50.4	34.6	59.9	47.5	32.9	34.6	39.1
P20810	CAST	Calpastatin	Homo sapiens	Medium	1	14.4	17.7	16.9	21.4	18.3	21.2	14.9	21.3	19.8	17.5	22.4
Q86V15	CASZ1	Zinc finger protein castor homolog 1	Homo sapiens	High	1	60.6	51.3	52.8	52.1	77	65.9	48.7	52.6	43.5	53.2	57.2
O43439	CBFA2T2	Protein CBFA2T2	Homo sapiens	High	11	411.3	409.5	399	445.2	449.1	440.3	418.5	463.6	397.7	463.1	397.8
O75081	CBFA2T3	Protein CBFA2T3	Homo sapiens	High	8	366.5	357.2	361.2	350.1	337.2	403.3	355.5	371.7	346.9	379.4	346.9
Q13951-2	CBFB	Isoform 2 of Core-binding factor subunit beta	Homo sapiens	High	4	152.4	161.3	164.8	183.9	107.4	170.3	92.3	122.2	136.8	136.9	112.5
Q13951	CBFB	Core-binding factor subunit beta	Homo sapiens	High	12	1325.2	1326.8	1333.7	1358.8	1136.1	1090.1	865.4	1003.1	1147.2	1094.2	922.8
J3KS23	CBFB	Core-binding factor subunit beta	Homo sapiens	Medium	2	9.7	13.6	15.5	10.9	16.3	12.5	7.6	10.7	14.1	10.4	6.9
P22681	CBL	E3 ubiquitin-protein ligase CBL	Homo sapiens	High	18	1170.9	1180.3	1144.5	1152.9	1237	1119.8	1279.4	1278.8	1147.5	1177.3	1189.2
Q13191	CBLB	E3 ubiquitin-protein ligase CBL-B	Homo sapiens	High	3	66.9	67.2	65.8	56.6	49.8	50.8	68.8	56.9	60.6	57.2	74.3
Q75N03	CBLL1	E3 ubiquitin-protein ligase Hakai	Homo sapiens	High	9	415.1	451.5	457.3	418.1	428.6	410	421.2	465.3	433.8	405.3	411.9
Q8N4T8	CBR4	Carbonyl reductase family member 4	Homo sapiens	High	10	1026.2	1058.2	1061.2	1023.6	1005.4	1074.1	1003.6	978.2	1079.8	980.6	1034
P0DN79	CBSL	Cystathionine beta-synthase-like protein	Homo sapiens	High	1	19.5	20.4	20.7	19.9	23.4	24.9	31.7	25	28.6	27.3	25
Q8IUF1	CBWD2	COBW domain-containing protein 2	Homo sapiens	High	3	520.6	549.2	517.1	500	529.5	469.2	493.9	516.7	491.2	480	471.4
Q5JTY5	CBWD3	COBW domain-containing protein 3	Homo sapiens	High	1	70.4	68.9	64.4	65.2	78.7	74.1	77.6	72.5	66.5	69.2	66.9
P83916	CBX1	Chromobox protein homolog 1	Homo sapiens	High	18	1602.3	1642	1707.3	1529.2	1232.4	1699.7	1557.5	1510.1	1697.1	1428.4	1660.8
Q14781	CBX2	Chromobox protein homolog 2	Homo sapiens	High	10	573	577.2	559	559.9	485.5	411.1	542	556.9	583	575.1	616
Q13185	CBX3	Chromobox protein homolog 3	Homo sapiens	High	17	3498.7	3964.3	3770.6	3531.8	3015.1	3714.6	3380.3	3413.1	3981.2	3693.3	3670.3
O00257	CBX4	E3 SUMO-protein ligase CBX4	Homo sapiens	High	13	785.2	751.5	770	749.4	658.4	543.2	741.1	733.5	756.6	744.3	786.3
P45973	CBX5	Chromobox protein homolog 5	Homo sapiens	High	14	1947.7	2227	2300.5	2304	1671.4	1837	1915.7	1855.7	2307	2074.2	2283.4
Q9HC52	CBX8	Chromobox protein homolog 8	Homo sapiens	High	16	913	902.7	955.8	952.6	845.8	783.5	869.8	867.1	883.9	807	903.8
Q6P1N0	CC2D1A	Coiled-coil and C2 domain-containing protein 1A	Homo sapiens	High	25	1022.1	1009.5	1014.6	994.9	1018.1	849.8	1012.8	1018.5	946.5	965.3	981.7
Q5T0F9	CC2D1B	Coiled-coil and C2 domain-containing protein 1B	Homo sapiens	High	13	570.8	566.7	562.8	574.3	584.7	628.8	552.2	629.5	561.8	556.8	594.5
Q8IX12	CCAR1	Cell division cycle and apoptosis regulator protein 1	Homo sapiens	High	43	3866.9	3739.1	3904.7	3901.4	3969.8	4158.8	4138.3	4043.2	3815	3668.4	3859.9
Q8N163	CCAR2	Cell cycle and apoptosis regulator protein 2	Homo sapiens	High	48	5483	5408.5	5344.4	5225.2	5602.1	4699.6	5804.2	5728.8	5414.8	5272.9	5153.6
Q96NT0	CCDC115	Coiled-coil domain-containing protein 115	Homo sapiens	High	4	80.3	76.8	69.1	70.4	88.9	66	72.9	62.3	81.3	65.5	82
Q8IWD4	CCDC117	Coiled-coil domain-containing protein 117	Homo sapiens	High	4	231.7	217.6	218.8	225	207	156.3	204.4	183.8	205.7	204.2	232.7
Q8WUD4	CCDC12	Coiled-coil domain-containing protein 12	Homo sapiens	High	12	1217.1	1195.3	1270.8	1151.8	835.5	864.9	1089.5	1071.8	1177.8	1147.2	1200.7
Q96HB5	CCDC120	Coiled-coil domain-containing protein 120	Homo sapiens	High	1	27.4	24.3	19.5	18.1	23.4	11	25.6	21.9	21.8	27	21.8
Q96CT7	CCDC124	Coiled-coil domain-containing protein 124	Homo sapiens	High	18	1083.1	1070.7	1081.9	1103.2	1081.3	1296	1087.4	1105.7	1051.3	1101.3	1109.2
Q96EE4	CCDC126	Coiled-coil domain-containing protein 126	Homo sapiens	High	1	23.5	17.3	24	17.9	41.6	24.8	23.7	19.9	20.4	23.4	18.4
Q96BQ5	CCDC127	Coiled-coil domain-containing protein 127	Homo sapiens	High	4	220.6	201.4	226.5	198.1	222.6	194	209.4	190.3	203.8	198.8	213.6
P13994	CCDC130	Coiled-coil domain-containing protein 130	Homo sapiens	High	7	242.3	229	233.3	227	209.2	179.2	230.2	233	218.1	222.2	239.9
Q9H6E4	CCDC134	Coiled-coil domain-containing protein 134	Homo sapiens	High	11	807.6	743.1	745.4	730.5	619.3	756.9	634.6	634.6	725.3	756.2	724.7
Q6PK04	CCDC137	Coiled-coil domain-containing protein 137	Homo sapiens	High	11	740.7	686.4	703.9	746	583	436.6	650.8	648.8	724.6	746.4	712
Q96M89	CCDC138	Coiled-coil domain-containing protein 138	Homo sapiens	High	5	262.5	232.6	262.5	273.3	266.8	241.6	246.3	261.1	254.9	246.3	257.5
Q49A88	CCDC14	Coiled-coil domain-containing protein 14	Homo sapiens	High	2	36.1	40.8	36.1	33.7	32	32.1	31.9	37.3	34.2	38.7	38.7
Q0P6D6	CCDC15	Coiled-coil domain-containing protein 15	Homo sapiens	High	2	46	46.8	41.7	41.2	40.4	34.4	37.5	41.6	48.9	36.7	45.2
Q9P0B6	CCDC167	Coiled-coil domain-containing protein 167	Homo sapiens	High	4	177.4	153.8	184.1	176.7	165.7	152.2	188.1	135.5	155.1	153.7	182.8
Q8NDH2	CCDC168	Coiled-coil domain-containing protein 168	Homo sapiens	High	2	414.3	364.8	381.4	382.7	337.2	345.9	361	352.6	358.6	343.3	311.6
Q6PII3	CCDC174	Coiled-coil domain-containing protein 174	Homo sapiens	High	8	297.4	293.8	295.2	283.2	270.3	243.2	276.6	279.6	308	280	298.8
P0C221	CCDC175	Coiled-coil domain-containing protein 175	Homo sapiens	High	1	35	28.3	36.4	33.2	18.4	30.2	19.1	18.5	30.5	30.3	40.8
Q5T9S5	CCDC18	Coiled-coil domain-containing protein 18	Homo sapiens	High	1	62.4	67.3	65.2	66.6	46.4	63.5	56.7	62.3	57.5	73.2	73.1
A6NF36	CCDC182	Coiled-coil domain-containing protein 182	Homo sapiens	Medium	1	109.2	100.1	77.3	67.2	60.4	78.9	102.6	58.2	91.2	52.7	89.5
Q7Z3E2	CCDC186	Coiled-coil domain-containing protein 186	Homo sapiens	High	8	226.2	238.9	221.6	228.7	231.2	278.2	247.1	243.1	238.3	220	247.5
O60826	CCDC22	Coiled-coil domain-containing protein 22	Homo sapiens	High	25	1170.6	1170.9	1121.4	1062.9	1187.6	959.1	1192.1	1177.1	1111.6	1148.5	1076
Q86WR0	CCDC25	Coiled-coil domain-containing protein 25	Homo sapiens	High	15	1160.3	1167	1172.8	1166.7	1124.2	1212.4	1132.3	1079.4	1202.6	1092.3	1227.6
Q8IWP9	CCDC28A	Coiled-coil domain-containing protein 28A	Homo sapiens	High	2	16.2	17.9	14.3	16.4	14.7	18.3	17.5	18.8	12	21.9	18.8
Q9BUN5	CCDC28B	Coiled-coil domain-containing protein 28B	Homo sapiens	High	2	31.6	31.8	33.2	27	34.5	27.5	28.1	28.8	19.2	30.8	31.6
Q96MW1	CCDC43	Coiled-coil domain-containing protein 43	Homo sapiens	High	7	657.1	612.1	638.7	688.4	604.1	689.9	659	676.7	666.6	675.7	646.3
Q96A33	CCDC47	Coiled-coil domain-containing protein 47	Homo sapiens	High	17	1435.6	1390.5	1435.5	1370.1	1906.9	1879.5	1553.5	1521.5	1428.5	1409.9	1382.5
Q96ER9	CCDC51	Coiled-coil domain-containing protein 51	Homo sapiens	High	13	590.4	560.5	565.4	536.4	613.4	583.4	554.3	557.4	548.4	550.9	547
Q9Y3C0	CCDC53	WASH complex subunit CCDC53	Homo sapiens	High	4	296	278.1	289.7	283.4	269.4	226.9	256.1	263.7	279.8	283.2	292.2
K7N7D6	CCDC57	Coiled-coil domain-containing protein 57 (Fragment)	Homo sapiens	Medium	1	15.6	18.8	19.8	16	29.9	6.8	16.4	20	15.9	15	22.9
Q4VC31	CCDC58	Coiled-coil domain-containing protein 58	Homo sapiens	High	7	645.5	560.1	585.3	551	649.9	471.3	524.8	503.2	503.6	629.6	588.7
Q9P031	CCDC59	Thyroid transcription factor 1-associated protein 26	Homo sapiens	High	9	490.2	584.3	491.2	449.8	281.9	265.6	412.5	485.2	571.4	576.2	485.2
Q16204	CCDC6	Coiled-coil domain-containing protein 6	Homo sapiens	High	26	2231.7	2081.5	2147.7	2134.3	2198.6	2185.7	2251.7	2209.5	2008.2	2189.1	2228.1
Q8N9Z2	CCDC71L	Coiled-coil domain-containing protein 71L	Homo sapiens	High	3	61.9	67.6	58.5	62.2	56.6	45	57.1	53.8	60.9	58.8	58.3
Q9BR77	CCDC77	Coiled-coil domain-containing protein 77	Homo sapiens	High	4	178.5	181.4	185.4	162.7	122.1	77.7	140.6	150.9	178.1	155.1	168.5
Q9H0W5	CCDC8	Coiled-coil domain-containing protein 8	Homo sapiens	High	2	10.1	10.1	15.3	11.4	13.6	13.5	13	15.9	11.6	13.5	13.1
Q8N4S0	CCDC82	Coiled-coil domain-containing protein 82	Homo sapiens	High	7	350.2	336.3	366.8	336.4	263.9	238.3	289.7	329.7	323.3	344.2	360.5
Q86UT8	CCDC84	Coiled-coil domain-containing protein 84	Homo sapiens	High	3	21.2	20	23.5	22.2	17.7	25.9	20.1	22.4	21.3	21.1	25.8
Q96PX6	CCDC85A	Coiled-coil domain-containing protein 85A	Homo sapiens	Medium	1	20	18.9	18.5	32.5	40.2	19.5	13.9	20	21.6	16.8	19.2
A6NKD9	CCDC85C	Coiled-coil domain-containing protein 85C	Homo sapiens	High	10	366.3	375.2	353	383.9	407.4	353	384.7	414.5	345.5	378.7	383
Q9H6F5	CCDC86	Coiled-coil domain-containing protein 86	Homo sapiens	High	23	1857.3	1804.9	1839.2	1869.1	1505.3	1500.7	1824.9	2018.4	1815.4	1954.2	1850.5
Q3V6T2	CCDC88A	Girdin	Homo sapiens	High	36	1456.2	1429.5	1340	1387.8	1287.2	1185.5	1442.7	1442.9	1397.8	1343.7	1381.7
A6NC98	CCDC88B	Coiled-coil domain-containing protein 88B	Homo sapiens	High	1	99.7	102.7	100.5	100.6	89.6	96.7	92.2	98	88.3	97.1	92.4
A6NC98-3	CCDC88B	Isoform 3 of Coiled-coil domain-containing protein 88B	Homo sapiens	High	3	95.3	85.2	84	88.5	97.6	91.7	88.1	75.6	88.2	77.3	83.1
Q9P219	CCDC88C	Protein Daple	Homo sapiens	High	32	1366.4	1324.9	1289.1	1286.2	1253	1289.4	1271	1349.4	1283.5	1387.4	1323.5
Q9Y3X0	CCDC9	Coiled-coil domain-containing protein 9	Homo sapiens	High	10	395.9	402.2	392.1	398.6	389.1	422.7	375.8	407	401.5	395.1	394.5
Q9GZT6	CCDC90B	Coiled-coil domain-containing protein 90B, mitochondrial	Homo sapiens	High	7	291.2	277	278.6	234	303.7	237.5	244.1	240.9	277.6	265.2	288.5
Q7Z6B0	CCDC91	Coiled-coil domain-containing protein 91	Homo sapiens	High	13	392.8	428.1	396.1	399.6	489.9	560.9	415.6	428	408.1	420.5	410.1
Q567U6	CCDC93	Coiled-coil domain-containing protein 93	Homo sapiens	High	29	1454	1451.3	1441.5	1420.8	1569.8	1440.4	1490.3	1489.1	1446.1	1432.1	1439.7
Q9BW85	CCDC94	Coiled-coil domain-containing protein 94	Homo sapiens	High	20	809.3	821.9	861.2	782.8	843.4	812.9	833.3	783.6	874.5	767.2	817.8
Q96F63	CCDC97	Coiled-coil domain-containing protein 97	Homo sapiens	High	10	372.3	380.5	401.1	424	433.1	438.2	400	414.5	395.2	361	385.5
Q9BSQ5	CCM2	Cerebral cavernous malformations 2 protein	Homo sapiens	High	7	296.3	293	308.7	351.1	286.3	335.2	293.1	341.2	303.7	325.5	329.1
P20248	CCNA2	Cyclin-A2	Homo sapiens	High	14	1101.9	1022.9	1046	957.8	687.2	353.3	804.8	940.7	977.7	951.1	996.6
P14635	CCNB1	G2/mitotic-specific cyclin-B1	Homo sapiens	High	9	769.9	748.1	736.7	612.1	872.9	594.8	750.3	730.4	676.7	722.4	650.1
O95067	CCNB2	G2/mitotic-specific cyclin-B2	Homo sapiens	High	14	712.6	664.8	649.4	567.1	658.5	363.1	591.1	604.4	616.5	655.9	652.7
Q8WWL7	CCNB3	G2/mitotic-specific cyclin-B3	Homo sapiens	High	1	91.5	77.4	92.6	78.6	76.6	86.8	82.7	73.3	86.3	65.5	79.4
P24863	CCNC	Cyclin-C	Homo sapiens	High	4	163.7	139.9	144.8	157.4	173.3	131.5	141	129.6	143	159.8	164.4
P30281	CCND3	G1/S-specific cyclin-D3	Homo sapiens	High	4	82.7	95.7	108	98.5	80.8	53.1	84.8	88.5	102.2	93.6	84.6
O95273	CCNDBP1	Cyclin-D1-binding protein 1	Homo sapiens	High	6	249.2	251.9	238.2	245.9	316.6	249.9	321.3	303.3	259.3	259.6	268.8
O96020	CCNE2	G1/S-specific cyclin-E2	Homo sapiens	High	3	72	76.4	77.7	98.4	47.6	49.9	69.6	68	71.6	75.8	95.5
P41002	CCNF	Cyclin-F	Homo sapiens	High	2	23.8	24.5	25	27.8	26.6	14	26	24	25.1	26.6	20.9
P51946	CCNH	Cyclin-H	Homo sapiens	High	8	371.2	447.1	389.4	330.6	383.7	371.2	403.3	395.6	435	425.3	387.1
O75909	CCNK	Cyclin-K	Homo sapiens	High	14	1149.9	1123.7	1146.1	1188.6	1092.7	1200.3	1141.9	1166	1084.9	1128.4	1104.1
Q9UK58	CCNL1	Cyclin-L1	Homo sapiens	High	8	363.5	426.9	422.3	418.2	520.5	521	482.4	468.2	422.9	429.9	406.9
Q96S94	CCNL2	Cyclin-L2	Homo sapiens	High	4	117.1	107.4	102.9	123.2	133.7	135.9	120.2	118.6	107.6	119	124.4
O60563	CCNT1	Cyclin-T1	Homo sapiens	High	13	932.4	955.1	975.4	928.6	891.6	937.5	1013.1	1005.9	977.2	895.8	928.8
O60583	CCNT2	Cyclin-T2	Homo sapiens	High	4	129.4	125.1	122	134.4	145.9	151.6	138.6	146.5	142.2	126.5	144.2
Q8ND76	CCNY	Cyclin-Y	Homo sapiens	High	6	220.7	231.3	229.5	233.7	230.4	212.5	235.9	235.7	215.5	216.5	246.6
Q8N7R7	CCNYL1	Cyclin-Y-like protein 1	Homo sapiens	High	2	113.2	107.5	115	123.5	129.6	108.9	111.6	124.1	105.5	110	115.2
O43303	CCP110	Centriolar coiled-coil protein of 110 kDa	Homo sapiens	High	13	726.9	703.5	724.9	701.2	496.1	310.2	634.8	696.6	762.2	687.5	663.4
Q9ULG6	CCPG1	Cell cycle progression protein 1	Homo sapiens	High	1	17.2	20.2	19.6	18.1	12.3	17.6	18.9	17.9	16.3	21.2	18.5
P51679	CCR4	C-C chemokine receptor type 4	Homo sapiens	High	1	23.8	25.6	21	35.4	25.2	30.1	25.4	27.5	20.4	33.8	31.6
O00421	CCRL2	C-C chemokine receptor-like 2	Homo sapiens	High	2	21.4	18.7	19.9	18.2	21	23.9	20.7	22.8	20.1	19.4	21
O14618	CCS	Copper chaperone for superoxide dismutase	Homo sapiens	High	11	888.8	840.4	879	864.9	777.9	683	794.2	763.9	896.1	762	872.1
Q9H7U1	CCSER2	Serine-rich coiled-coil domain-containing protein 2	Homo sapiens	High	2	68.3	60.1	67	59.3	64.6	60.4	60.9	59.9	62.3	64.6	71.4
Q4G0I0	CCSMST1	Protein CCSMST1	Homo sapiens	High	2	32	35.4	29.4	28.7	37.1	40.2	35.3	31.6	30.6	36.8	32
P78371	CCT2	T-complex protein 1 subunit beta	Homo sapiens	High	39	9589.1	9657.1	9539.4	9134.1	9622.7	9112.9	9470.2	8712.5	9458.2	9049.1	9355.6
P49368	CCT3	T-complex protein 1 subunit gamma	Homo sapiens	High	41	7927.7	8453.8	8224.4	8178.1	8609	8874.7	8637.8	8385.4	8600.9	8324.5	8334.3
P50991	CCT4	T-complex protein 1 subunit delta	Homo sapiens	High	36	7216.3	7418.6	7438.5	7868.5	7506.7	8335.9	7520.7	7936.9	7271.8	7655.6	7851
P48643	CCT5	T-complex protein 1 subunit epsilon	Homo sapiens	High	41	11776.7	11748.9	11730.3	11581.1	11809.3	12155.8	12110.4	11840	11830.1	10973.4	11681.6
P40227	CCT6A	T-complex protein 1 subunit zeta	Homo sapiens	High	29	4602.4	4799.5	4751.2	4700.1	5099.9	4882.9	5136.1	4890.8	4802.4	5023.5	4880.6
Q99832	CCT7	T-complex protein 1 subunit eta	Homo sapiens	High	43	6197.5	6602.9	6407.8	6317.7	6490.1	6423.9	6760.8	6553.7	6545.2	6369.6	6509.8
P50990	CCT8	T-complex protein 1 subunit theta	Homo sapiens	High	46	13487.6	13663.3	13399.5	13007.4	12588.5	13728.3	12937.5	13067.8	13587	13232.9	13208.7
P86790	CCZ1B	Vacuolar fusion protein CCZ1 homolog B	Homo sapiens	High	17	947.1	905.9	949	922.9	896.2	807.1	912.2	867.7	872.4	900.4	953.1
P48509	CD151	CD151 antigen	Homo sapiens	High	3	65.4	93.1	78.3	89.7	89.9	117	103.7	93.6	97.4	91.8	110.2
Q15762	CD226	CD226 antigen	Homo sapiens	High	3	118.1	104.7	120	127	109.9	111.3	103.1	114.4	101.9	112.5	101.8
P20963	CD247	T-cell surface glycoprotein CD3 zeta chain	Homo sapiens	High	6	388.1	378.8	365.1	366.8	301.8	316.8	335.9	356	369.4	359.3	364.5
Q9Y5K6	CD2AP	CD2-associated protein	Homo sapiens	High	34	3406.5	3393	3264.5	3510.6	3106.8	3223.3	3287.6	3364.9	3411.9	3342.3	3242.1
O95400	CD2BP2	CD2 antigen cytoplasmic tail-binding protein 2	Homo sapiens	High	14	836.1	825.3	819.7	870.4	788.8	933	801.1	841.5	809.7	858.4	814.5
Q9NPF0	CD320	CD320 antigen	Homo sapiens	High	2	30.5	36.5	40.7	38.8	50.3	47.6	39	45.6	35	39	38.7
P28907	CD38	ADP-ribosyl cyclase/cyclic ADP-ribose hydrolase 1	Homo sapiens	High	15	1170.4	1153.9	1132.6	1130.1	991.9	989.9	1047.2	1070.4	1064.7	1162.4	1070.8
P04234	CD3D	T-cell surface glycoprotein CD3 delta chain	Homo sapiens	High	7	389.1	350.8	385.2	427.8	368.6	376.3	361.2	395.6	388.2	343.5	399.6
P07766	CD3E	T-cell surface glycoprotein CD3 epsilon chain	Homo sapiens	High	8	643.5	616.6	646.5	747.8	583.5	764.4	626.1	664.5	609.7	673.4	724.6
O15446	CD3EAP	DNA-directed RNA polymerase I subunit RPA34	Homo sapiens	High	12	573.1	574.1	571.2	531.4	657.6	554.6	624.8	639.8	525.8	530.3	548.3
P09693	CD3G	T-cell surface glycoprotein CD3 gamma chain	Homo sapiens	High	10	708.5	627.5	653.5	704.4	646.9	643.9	591.7	553.3	634.6	623.4	655.4
P01730	CD4	T-cell surface glycoprotein CD4	Homo sapiens	High	16	1396.1	1319.5	1355.7	1354.3	1030.3	1070.8	1168.5	1160.1	1387.7	1295.9	1302.8
P16070	CD44	CD44 antigen	Homo sapiens	High	11	1121.1	1054	1082.9	1100.1	953.4	1079.4	1069.6	989.2	1079.3	1041.2	1086.1
P15529-2	CD46	Isoform B of Membrane cofactor protein	Homo sapiens	High	1	40.8	32.4	32.4	32.1	27.9	29.1	26.3	30.4	31.5	30.2	30.5
P15529	CD46	Membrane cofactor protein	Homo sapiens	High	7	598	611.4	581.8	614.9	581.4	621.9	557.9	611.1	614	585.6	655.3
Q08722	CD47	Leukocyte surface antigen CD47	Homo sapiens	High	7	492.8	484.8	485.7	538.6	398.1	567.4	472.8	490.3	492.5	595.7	498
P09326	CD48	CD48 antigen	Homo sapiens	High	2	59.5	66.5	62.2	53.8	48.7	51.8	51.7	54.7	62.6	63.8	55
P06127	CD5	T-cell surface glycoprotein CD5	Homo sapiens	High	6	330.6	324.4	322.3	359.3	327.3	351	329	338.1	322	299.3	338.6
P19397	CD53	Leukocyte surface antigen CD53	Homo sapiens	High	2	101.1	118.4	95.5	112.3	94.1	125.8	100.5	134.8	120.5	128.2	128.7
P08174	CD55	Complement decay-accelerating factor	Homo sapiens	High	2	64.8	67.9	64.8	63.4	65.1	72.3	66.4	66.3	62.4	65.9	69.3
P19256	CD58	Lymphocyte function-associated antigen 3	Homo sapiens	High	1	12.7	11.6	7.7	9.4	12.5	12.6	12.6	8.6	7.5	8	10.3
P13987	CD59	CD59 glycoprotein	Homo sapiens	High	3	202.7	187.6	172.2	168.8	164.3	157.8	184.4	181.6	208	185.2	198.1
P08962	CD63	CD63 antigen	Homo sapiens	High	2	521.3	517.4	491.6	616.4	454.4	597.9	486.4	512.4	479	603.9	567.5
P09564	CD7	T-cell antigen CD7	Homo sapiens	High	4	118.4	128.3	115.4	123.2	105.8	110.1	117.8	128.1	113	109.6	125.6
P60033	CD81	CD81 antigen	Homo sapiens	High	4	279.6	304.3	262.2	350.1	268.9	387.5	289.9	351.8	313.2	350.7	332.6
P27701	CD82	CD82 antigen	Homo sapiens	High	5	273.8	245.4	243.3	375.5	247.9	364.3	222.3	294.9	246.8	286.6	302.3
Q01151	CD83	CD83 antigen	Homo sapiens	High	3	45.6	40.8	39.8	39.9	29.4	25	37.7	39.5	43.4	37	53.5
Q9UIB8	CD84	SLAM family member 5	Homo sapiens	High	8	607.3	611.8	593.6	575.7	560.9	646.8	581	609.8	599.4	591.3	628.2
P48960	CD97	CD97 antigen	Homo sapiens	High	4	132.3	131.5	121.8	142.4	145	123.1	157.5	146	138.2	147.3	145
P14209	CD99	CD99 antigen	Homo sapiens	High	1	63.3	68.9	56.8	79.4	67.5	54.8	56	67.3	51.4	74.2	63.4
Q8TCZ2	CD99L2	CD99 antigen-like protein 2	Homo sapiens	High	3	83.4	78.5	81.9	87.2	96.8	64.5	96.7	110.5	77.9	83.6	98.9
Q9BWV3	CDADC1	Cytidine and dCMP deaminase domain-containing protein 1	Homo sapiens	High	1	10.5	11.8	12.7	14.1	11	13.1	13.9	12.2	14.7	9.1	12.1
Q8IWY9	CDAN1	Codanin-1	Homo sapiens	High	13	433.4	463.7	418.3	472.1	566.6	429.1	483.2	529.2	412.5	449.4	445.6
O75794	CDC123	Cell division cycle protein 123 homolog	Homo sapiens	High	13	786.1	735.8	738.3	805.6	1015.1	1035.8	821.6	835.5	733.3	771.5	811.3
Q13042	CDC16	Cell division cycle protein 16 homolog	Homo sapiens	High	13	618.9	624.3	628.8	661.2	721.7	647.6	635.4	713.5	610.6	627.7	646
Q12834	CDC20	Cell division cycle protein 20 homolog	Homo sapiens	High	16	632	657.7	642.4	627.1	813.4	703.6	674.8	712.8	658.2	685.4	646.1
Q9UJX2	CDC23	Cell division cycle protein 23 homolog	Homo sapiens	High	15	685.4	733.7	664.6	724.9	831.3	728.8	665.5	736.2	673.5	757.2	704.1
P30304	CDC25A	M-phase inducer phosphatase 1	Homo sapiens	High	1	10.6	10.4	8.4	10.3	17	16	12	9	9.2	12.3	9.3
P30305	CDC25B	M-phase inducer phosphatase 2	Homo sapiens	High	5	230.3	232.8	238.3	223.7	257.7	243	241.1	239.1	242.6	235.7	232
P30307	CDC25C	M-phase inducer phosphatase 3	Homo sapiens	High	5	245.1	243.7	240.3	249.4	197.3	159.2	224.1	241.3	252.8	235.1	259.4
Q8NHZ8	CDC26	Anaphase-promoting complex subunit CDC26	Homo sapiens	High	2	130.6	123.4	131.5	123.5	107.7	75.4	113.6	91.4	96	102.9	114.1
P30260	CDC27	Cell division cycle protein 27 homolog	Homo sapiens	High	26	1380.7	1382.8	1353.5	1349.7	1349.3	1278.4	1371.6	1313.2	1355.3	1337.1	1347.8
P49427	CDC34	Ubiquitin-conjugating enzyme E2 R1	Homo sapiens	High	5	280.3	271.5	269.9	270.9	268.8	304.1	259.6	247.6	268.8	274.2	249.8
Q16543	CDC37	Hsp90 co-chaperone Cdc37	Homo sapiens	High	28	3034.7	3272.3	3153.8	3103.5	2982.5	3602.3	3410	3615	3249.1	3379.7	3249.1
Q7L3B6	CDC37L1	Hsp90 co-chaperone Cdc37-like 1	Homo sapiens	Medium	1	33.1	36.1	37.4	38.2	41.2	35.3	38	38.3	33.8	29.5	34.5
O60508	CDC40	Pre-mRNA-processing factor 17	Homo sapiens	High	30	1807.5	1749.9	1869.6	1802	1684.4	1701.9	1792.2	1745.4	1797.3	1733.5	1823.9
P60953	CDC42	Cell division control protein 42 homolog	Homo sapiens	High	10	1621.1	1706.9	1749.7	1674.9	1469.3	1625.2	1771.8	1661.5	1791.9	1649.6	1739.6
Q6DT37	CDC42BPG	Serine/threonine-protein kinase MRCK gamma	Homo sapiens	Medium	1	128.8	114.3	122	128.2	126.7	149.9	128.8	102.5	124.8	111.6	123.5
Q9NRR3	CDC42SE2	CDC42 small effector protein 2	Homo sapiens	High	1	157.1	155.8	149	159.6	129.5	103.8	153.2	155.2	147.6	140.5	157.4
O75419	CDC45	Cell division control protein 45 homolog	Homo sapiens	High	10	605.4	641	625.5	672.8	602.4	647	550.9	693.3	610.7	618.8	679.2
Q99459	CDC5L	Cell division cycle 5-like protein	Homo sapiens	High	52	3304.2	3412.1	3370.8	3140.1	3158.6	3314.2	3375.7	3416.2	3508.6	3367.6	3252.8
Q99741	CDC6	Cell division control protein 6 homolog	Homo sapiens	High	5	66.9	79	75	69.7	59.8	54.3	55.4	66.8	68.5	60.7	85
O00311	CDC7	Cell division cycle 7-related protein kinase	Homo sapiens	High	9	328.4	316.8	330	307.6	385.5	385.4	338.1	337.3	309	309.9	329
Q6P1J9	CDC73	Parafibromin	Homo sapiens	High	33	2846.1	2834.6	2837.8	2771.6	2513.6	2538.1	2705.1	2704	2981.8	2934.2	2739
Q69YH5	CDCA2	Cell division cycle-associated protein 2	Homo sapiens	High	31	1187	1200.1	1171.6	1183.9	1487.5	1502.1	1274	1328.2	1172.1	1097.2	1195.2
Q99618	CDCA3	Cell division cycle-associated protein 3	Homo sapiens	High	5	177	173.1	168.2	198.3	244.6	251.6	215.2	293.7	163.3	220.6	180.9
Q9BXL8	CDCA4	Cell division cycle-associated protein 4	Homo sapiens	High	3	113.7	104.9	108.7	117.8	86.1	55.2	101.1	102.6	101.8	109.3	101.3
Q96FF9	CDCA5	Sororin	Homo sapiens	High	11	721.5	697.8	694.3	656.8	705.9	652	654.6	686.9	698.3	701.2	678.1
Q9BWT1	CDCA7	Cell division cycle-associated protein 7	Homo sapiens	High	4	139.9	137.1	129.7	143.5	98.6	82.8	111.1	129.3	137.7	143.7	146.7
Q96GN5	CDCA7L	Cell division cycle-associated 7-like protein	Homo sapiens	High	12	500.3	482.7	504.3	498.1	406.4	324.9	448.2	415.7	507.6	494.6	544
Q53HL2	CDCA8	Borealin	Homo sapiens	High	11	709.6	719.3	707.8	671.5	1119.2	1372.7	800.5	730.3	647.7	683.5	668.7
Q9H159	CDH19	Cadherin-19	Homo sapiens	Medium	1	112.6	103.1	97	93.9	84.1	74.3	98.9	94.8	98.5	96.8	98.4
P19022	CDH2	Cadherin-2	Homo sapiens	High	4	105.7	108.6	107.5	107.1	107.6	112.5	104.5	107.4	114.7	107.9	102.3
Q9ULB5	CDH7	Cadherin-7	Homo sapiens	Medium	1	57.5	48.2	43.8	45.3	37.2	44.7	38.1	38.1	40.8	48.7	45.1
O14735	CDIPT	CDP-diacylglycerol--inositol 3-phosphatidyltransferase	Homo sapiens	High	3	332.9	293.1	281.9	345.9	366	348.1	279.6	307.5	283.6	319.5	314.7
P06493	CDK1	Cyclin-dependent kinase 1	Homo sapiens	High	17	3228.7	3046.9	3216.6	3183.3	3110.4	3215	2941.1	2892.8	3033.3	3061.5	3240.2
Q15131	CDK10	Cyclin-dependent kinase 10	Homo sapiens	Medium	2	54.3	49.6	51.3	54.1	55.9	55.2	47.8	59.2	53.7	53	64.2
Q9UQ88	CDK11A	Cyclin-dependent kinase 11A	Homo sapiens	High	2	82.3	67	79.6	76	79.2	66.6	86.2	73.5	67.4	60.3	80.7
P21127	CDK11B	Cyclin-dependent kinase 11B	Homo sapiens	High	5	2447.1	2375.3	2426.3	2361.9	2265.8	2146.9	2311.3	2411.6	2423.3	2326.8	2405.7
Q9NYV4	CDK12	Cyclin-dependent kinase 12	Homo sapiens	High	20	1825.2	1750.4	1814.6	1835.8	1903.5	1832.5	1878.6	1897.9	1823.1	1790.3	1819.9
Q14004	CDK13	Cyclin-dependent kinase 13	Homo sapiens	High	18	593.4	599.4	595.4	587.7	512.2	539.4	548.3	596.1	591.6	565	589.1
Q00536	CDK16	Cyclin-dependent kinase 16	Homo sapiens	High	2	59.4	53.7	59.8	71.7	76.3	66	62.2	69.3	61.8	50.2	63.3
Q00537	CDK17	Cyclin-dependent kinase 17	Homo sapiens	High	2	153	152.2	172.9	184.8	218.4	206	215.5	222.1	166.8	164.9	164
Q07002	CDK18	Cyclin-dependent kinase 18	Homo sapiens	High	1	18.3	15.7	21.1	26.7	23.2	32.2	16.5	24.9	15.8	15.6	24.1
Q9BWU1	CDK19	Cyclin-dependent kinase 19	Homo sapiens	High	1	40.8	35.8	45.9	46.6	38.4	43.5	47.4	44.4	45.5	47.5	43.6
P24941	CDK2	Cyclin-dependent kinase 2	Homo sapiens	High	14	1343.7	1325.6	1307.2	1301.6	1306.2	994.5	1133.6	1088.1	1341.5	1248.1	1335.9
O14519	CDK2AP1	Cyclin-dependent kinase 2-associated protein 1	Homo sapiens	High	2	84.6	86	84.2	78.4	92.8	62.9	75.9	83.3	81.2	83.1	85
P11802	CDK4	Cyclin-dependent kinase 4	Homo sapiens	High	14	630.3	644.6	639.1	659.3	549.6	481.7	628.1	636.9	651.6	709.3	732.2
Q00535	CDK5	Cyclin-dependent-like kinase 5	Homo sapiens	High	13	763.8	758.1	792.7	807.8	785.5	850.7	805.8	794.1	761	726.5	811.8
Q96SZ6	CDK5RAP1	CDK5 regulatory subunit-associated protein 1	Homo sapiens	High	14	879.6	880.2	861.8	831.1	834.4	720.8	829.8	803.1	850.9	774.8	868.2
Q96SN8	CDK5RAP2	CDK5 regulatory subunit-associated protein 2	Homo sapiens	High	26	976.1	995.3	1005.8	994.2	995.2	825.4	980.8	1029.2	995.6	1028.1	1035.9
Q96JB5	CDK5RAP3	CDK5 regulatory subunit-associated protein 3	Homo sapiens	High	24	1603	1533.4	1613.3	1666.3	1856.2	1442.6	1727	1708.8	1532.6	1483.4	1611.9
Q00534	CDK6	Cyclin-dependent kinase 6	Homo sapiens	High	18	1279.7	1347	1324.9	1417.8	1650.1	1566	1540.7	1499.3	1415.8	1406.1	1415.5
P50613	CDK7	Cyclin-dependent kinase 7	Homo sapiens	High	8	352.6	309.8	323.6	332	317.8	289.1	294.1	281.6	314.1	304.8	341.7
P49336	CDK8	Cyclin-dependent kinase 8	Homo sapiens	High	6	547.1	552.1	548	574.1	589.2	591.8	573.7	601.5	564.3	565.4	557.9
P50750	CDK9	Cyclin-dependent kinase 9	Homo sapiens	High	12	250.9	255.3	262.2	283.1	221.1	257	260.6	235.5	256.6	238	245.5
P50750-2	CDK9	Isoform 2 of Cyclin-dependent kinase 9	Homo sapiens	High	6	153.4	148.6	147.6	171.4	164.5	157.1	151.9	164.6	153.7	155.2	166.2
Q5VV42	CDKAL1	Threonylcarbamoyladenosine tRNA methylthiotransferase	Homo sapiens	High	14	850	900.5	870.7	900.8	986.4	917.4	943.2	937.1	916.7	843.5	905.7
P46527	CDKN1B	Cyclin-dependent kinase inhibitor 1B	Homo sapiens	High	1	19.3	14.7	20.3	19.5	17.1	13.3	16.1	17.7	18.5	18.3	14.7
Q9NXV6	CDKN2AIP	CDKN2A-interacting protein	Homo sapiens	High	24	1815.4	1708.7	1822	1778.9	1612.4	1521.3	1686.6	1629.3	1728.8	1720.1	1782
Q96HQ2	CDKN2AIPNL	CDKN2AIP N-terminal-like protein	Homo sapiens	High	2	63.3	70.3	59.8	55.7	67.7	44.6	72.4	66.1	64.3	71.3	70.1
P42773	CDKN2C	Cyclin-dependent kinase 4 inhibitor C	Homo sapiens	High	6	233.5	229.4	193.9	196.6	233.9	144.3	203.9	175.1	214.5	194.3	214.8
Q16667	CDKN3	Cyclin-dependent kinase inhibitor 3	Homo sapiens	Medium	1	37.7	35.9	38.5	32	36.2	36.2	34.2	34.8	39	31.9	33.9
Q01850	CDR2	Cerebellar degeneration-related protein 2	Homo sapiens	High	1	26.4	23.6	25	22.3	22.7	31.2	30.8	28.4	23.5	20.7	24.1
O95674	CDS2	Phosphatidate cytidylyltransferase 2	Homo sapiens	High	7	484.2	440.3	493.7	643.6	447.6	627.8	508.7	520.8	465	564.2	567.7
Q15517	CDSN	Corneodesmosin	Homo sapiens	High	3	181.1	215.1	191.6	135.7	233.7	164.6	148.5	129.1	151.1	283.7	151.3
Q9H211	CDT1	DNA replication factor Cdt1	Homo sapiens	High	6	151.2	155.7	164.2	165.9	208.3	218.6	162.6	156.5	159.5	160.4	151.8
Q9UKY7	CDV3	Protein CDV3 homolog	Homo sapiens	High	17	1677.8	1559.4	1641.6	1444.8	1338.4	1311.8	1328.5	1386.1	1409.3	1622.2	1446.5
Q9Y232	CDYL	Chromodomain Y-like protein	Homo sapiens	High	11	336.2	324.1	329.4	349.6	338.1	331.5	343.5	334.4	326.5	348.6	355.1
P17676	CEBPB	CCAAT/enhancer-binding protein beta	Homo sapiens	High	2	56.3	48.5	49.6	48.9	45.8	24.1	42.2	46.9	52.3	54.6	43.5
P53567	CEBPG	CCAAT/enhancer-binding protein gamma	Homo sapiens	High	2	92.9	97.9	103.9	93.5	84	66.2	76.3	70.6	101	93.1	97.5
Q03701	CEBPZ	CCAAT/enhancer-binding protein zeta	Homo sapiens	High	39	3068.8	2951.1	3050.1	3040.2	2478.5	1798.4	2917.3	2981.7	2948.8	2860.7	2904.9
Q9BXW7	CECR5	Cat eye syndrome critical region protein 5	Homo sapiens	High	12	1284.4	1230.2	1240	1161.5	1315.3	1144.2	1207.4	1130	1311.4	1138.1	1154.7
Q92879	CELF1	CUGBP Elav-like family member 1	Homo sapiens	High	10	1287.4	1339.1	1303	1189.5	1317.1	1081.2	1282.3	1237.5	1359.2	1273.2	1249.7
A0A0J9YXJ0	CELF2	CUGBP Elav-like family member 2	Homo sapiens	Medium	2	492.9	483.2	460.1	444.4	464.4	396.7	445.9	411.4	475.6	423.4	470.3
O95319	CELF2	CUGBP Elav-like family member 2	Homo sapiens	High	12	1615.6	1644.3	1554.8	1535.5	1784.8	1396.9	1739.1	1634.2	1736	1667.1	1559.6
P49450	CENPA	Histone H3-like centromeric protein A	Homo sapiens	Medium	1	66.2	67.3	64	58.6	71.3	78.3	62.1	62	68.1	69.9	61.1
P07199	CENPB	Major centromere autoantigen B	Homo sapiens	High	8	244.2	235.8	239.2	244.8	259.8	286.7	223.2	228.2	217	202.7	225.2
Q03188	CENPC	Centromere protein C	Homo sapiens	High	21	1043.9	992.6	991.3	955.6	932.4	843.8	966	917.3	993	966.8	993.6
Q02224	CENPE	Centromere-associated protein E	Homo sapiens	High	54	2172.3	2205.5	2175.1	2098.3	3035.1	3222.3	2515.3	2406.3	2028.6	2134.8	2047.9
P49454	CENPF	Centromere protein F	Homo sapiens	High	127	6068.7	5964.5	6037.4	5378.5	9339.3	8418.5	7104.9	6880.8	5690.8	5355.6	5358.8
Q9H3R5	CENPH	Centromere protein H	Homo sapiens	High	9	904.5	683.2	687.2	614.3	565.7	391.7	540.2	549.8	557	644.7	635.9
Q92674	CENPI	Centromere protein I	Homo sapiens	High	11	381.3	332.5	346	345.4	364.3	358.2	343.2	347.4	344.4	324.2	345.5
Q9HC77	CENPJ	Centromere protein J	Homo sapiens	High	5	128.1	138.3	150.7	131.8	139.1	125.1	150	124.4	128.3	160.9	145
Q9BS16	CENPK	Centromere protein K	Homo sapiens	High	1	180.4	149.3	163.7	156.8	187.3	114.8	106.5	118.8	120.9	140	148.4
Q8N0S6	CENPL	Centromere protein L	Homo sapiens	High	7	390.3	369.3	388.5	407.4	407.2	444.8	365.1	381.2	374	407.4	389.7
Q9NSP4	CENPM	Centromere protein M	Homo sapiens	High	3	72.6	82.9	72.4	72.1	82.1	78.6	73.9	67.7	85.8	67.6	79.3
Q96H22	CENPN	Centromere protein N	Homo sapiens	High	6	157.1	156.6	166.9	161.9	174.8	165.4	139.9	142.1	148.1	133.8	162.7
Q9BU64	CENPO	Centromere protein O	Homo sapiens	High	5	122	136.1	133.2	151.6	145.4	132.1	137.3	148.1	141.3	134.8	159.3
Q6IPU0	CENPP	Centromere protein P	Homo sapiens	High	6	188.9	169.9	171.5	159.4	157.1	140.7	139.8	136.4	154.7	160.2	154.6
Q7L2Z9	CENPQ	Centromere protein Q	Homo sapiens	High	10	439.2	402.4	421.7	401.2	350.5	344.3	354	354.2	403.6	399	411.8
Q96BT3	CENPT	Centromere protein T	Homo sapiens	High	8	134.5	135.5	129.1	128.8	121.4	122.7	122.2	137.2	128.6	124.8	125
Q71F23	CENPU	Centromere protein U	Homo sapiens	High	12	829.5	732	829.8	803.1	774.4	641.4	755.7	706.8	757.7	729.8	795.7
Q7Z7K6-3	CENPV	Isoform 3 of Centromere protein V	Homo sapiens	High	2	38.7	24.8	27.9	25.5	27.9	13.2	26.4	29.8	31.1	24.2	34
Q7Z7K6	CENPV	Centromere protein V	Homo sapiens	High	10	705.6	657.3	697.6	659.3	715.6	668.8	696.1	642.3	715.6	630.1	689.5
O60308	CEP104	Centrosomal protein of 104 kDa	Homo sapiens	High	2	52.4	52	55.4	53.1	63.4	54.7	48.7	53.4	55.7	46.2	64
Q8N960	CEP120	Centrosomal protein of 120 kDa	Homo sapiens	High	4	88.6	97	92.1	74.7	60.5	44.5	76	84.2	78.1	80.6	77.1
Q6ZU80	CEP128	Centrosomal protein of 128 kDa	Homo sapiens	High	10	335.2	385.6	326.9	349.7	284.5	353.4	296.6	320.1	341.6	342.7	324.5
Q9UPN4	CEP131	Centrosomal protein of 131 kDa	Homo sapiens	High	39	2281.5	2218	2262.1	2304	2118.6	1859.4	2304.6	2326.3	2226.9	2287.4	2262.4
Q9UPN4-2	CEP131	Isoform 2 of Centrosomal protein of 131 kDa	Homo sapiens	High	11	17.3	15.9	14.3	20.7	27.4	20.3	23	23.9	17.9	22.1	17.8
Q66GS9	CEP135	Centrosomal protein of 135 kDa	Homo sapiens	High	23	712.9	711	733.8	667.9	581.3	474.7	687.5	645.5	716.7	676.6	687.8
O94986	CEP152	Centrosomal protein of 152 kDa	Homo sapiens	High	11	287.5	280.1	294.7	277.3	215.8	162.2	259	307.1	294.9	296.8	295.5
Q9UPV0	CEP164	Centrosomal protein of 164 kDa	Homo sapiens	High	3	51.3	55	49.2	47.7	43.6	55.8	41.3	51.5	44.2	47.3	44.5
Q5SW79	CEP170	Centrosomal protein of 170 kDa	Homo sapiens	High	39	2266.4	2190.4	2253.6	2267.5	2059.3	2033.7	2180.8	2190.7	2208.2	2220.4	2235.9
Q5SW79-3	CEP170	Isoform 3 of Centrosomal protein of 170 kDa	Homo sapiens	High	10	24.6	27.1	28.6	27.3	26.8	24.4	26.2	30.4	20.3	22.3	30
Q96L14	CEP170P1	Cep170-like protein	Homo sapiens	High	1	13.1	12.5	11.6	15	11.9	10.4	10.7	12.2	11.2	12.2	11.3
Q8TEP8-3	CEP192	Isoform 3 of Centrosomal protein of 192 kDa	Homo sapiens	High	11	63.7	65.3	64.1	59.7	43.7	46.8	47.5	56.8	61.3	56.4	73.5
Q8TEP8	CEP192	Centrosomal protein of 192 kDa	Homo sapiens	High	16	392.1	364.4	390.1	398.2	383.5	334.9	361.5	372.4	376.8	364.2	403
Q9BV73	CEP250	Centrosome-associated protein CEP250	Homo sapiens	High	26	850.4	843.1	818.9	806	886.5	848.3	924.3	1007.8	795.3	851.2	829.7
O15078	CEP290	Centrosomal protein of 290 kDa	Homo sapiens	High	6	368.9	313.4	315.2	362.2	324.3	305.8	294.8	311.6	307.1	327.7	344.2
Q9C0D2	CEP295	Centrosomal protein of 295 kDa	Homo sapiens	High	1	23.4	25.3	21.4	27.5	19.7	21.2	20.1	27	24.2	19.7	21.4
Q5VT06	CEP350	Centrosome-associated protein 350	Homo sapiens	High	47	1541.3	1493.2	1522.4	1587.4	1374	1271.7	1436.9	1901.4	1483.1	1535.8	1571.6
Q9BYV8	CEP41	Centrosomal protein of 41 kDa	Homo sapiens	High	11	583.6	538.1	554.9	556.8	513.2	535	518	511.4	506.3	445.6	592.1
Q9C0F1	CEP44	Centrosomal protein of 44 kDa	Homo sapiens	High	12	560.1	587.8	600.4	609.8	606.2	484.3	597	612.2	603.1	567.2	634.2
Q53EZ4	CEP55	Centrosomal protein of 55 kDa	Homo sapiens	High	24	1194.4	1288.6	1231.3	1199.1	1166.6	1191	1216.6	1255.8	1222.2	1146.3	1240.7
Q86XR8	CEP57	Centrosomal protein of 57 kDa	Homo sapiens	High	11	399.7	391.4	377.2	373	373.7	296	400.9	386.5	398.1	359.2	407.2
Q76N32	CEP68	Centrosomal protein of 68 kDa	Homo sapiens	Medium	1	12	12.9	15.7	12.5	12.7	12.2	11.8	11.6	11.6	10.9	11.5
Q8TAP6	CEP76	Centrosomal protein of 76 kDa	Homo sapiens	High	8	264.8	240.5	261.1	264.2	263.6	238.4	237.2	278.4	257.2	258.8	264.5
Q5JTW2	CEP78	Centrosomal protein of 78 kDa	Homo sapiens	High	12	446.9	411.8	431.3	446.9	322.8	207.7	372.6	390.8	452.4	419.2	472.1
Q9Y592	CEP83	Centrosomal protein of 83 kDa	Homo sapiens	High	3	24	30.9	26.5	22.8	23	29	24.1	26.5	23.4	24.3	24.7
Q6P2H3	CEP85	Centrosomal protein of 85 kDa	Homo sapiens	High	14	420.6	448.6	468.9	448.1	497.1	391.1	483.7	488.2	422.5	441.6	467.9
Q5SZL2	CEP85L	Centrosomal protein of 85 kDa-like	Homo sapiens	High	4	145.5	135.1	125.2	133.5	142.7	132.2	127.9	142.9	135.6	136.8	133.2
Q96GE4	CEP95	Centrosomal protein of 95 kDa	Homo sapiens	High	3	37.8	35.2	47.9	46.4	34	49.6	34.1	44.9	37.2	38.8	39.5
Q8IW35	CEP97	Centrosomal protein of 97 kDa	Homo sapiens	High	17	573.6	585.6	576.5	554.1	526.7	396.1	539.8	512.7	554.2	521.2	570.8
Q9Y6K0	CEPT1	Choline/ethanolaminephosphotransferase 1	Homo sapiens	High	3	597.4	613.2	619.3	695.1	645.9	857	559.5	599.9	586.9	738.7	603.1
Q5T4B2	CERCAM	Probable inactive glycosyltransferase 25 family member 3	Homo sapiens	Medium	1	73.2	62	68.7	72	38.7	81.5	39.4	48.1	57.6	64.5	54.7
Q96G23	CERS2	Ceramide synthase 2	Homo sapiens	High	6	588.6	536.4	568.4	741.6	701.8	839.3	626.3	664.9	565.2	766.4	652.7
Q9HA82	CERS4	Ceramide synthase 4	Homo sapiens	High	2	59.8	53.3	55.5	66.4	57.6	74.9	63.5	61.5	62.5	60.4	57.3
Q8N5B7	CERS5	Ceramide synthase 5	Homo sapiens	High	3	107	108.7	116.4	153.3	131	143.8	116.3	134	110.6	130.9	126.3
Q6ZMG9	CERS6	Ceramide synthase 6	Homo sapiens	High	4	334	360.3	375.9	302.3	359.7	356.5	480.3	328.5	408.7	426	359.2
Q6UWW8	CES3	Carboxylesterase 3	Homo sapiens	High	7	259	247.3	263.4	290.8	286.5	249.5	297	322.6	247.3	253.9	267.3
P41208	CETN2	Centrin-2	Homo sapiens	High	7	306.4	306	281.9	277.2	280.9	254.8	265.2	263.7	258.7	289	256.8
O15182	CETN3	Centrin-3	Homo sapiens	High	7	659.8	654.3	650.8	660.3	495.2	517.5	519.3	555.9	616.6	609.8	565
Q9Y6A4	CFAP20	Cilia- and flagella-associated protein 20	Homo sapiens	High	5	764.2	794.5	798.8	737.4	644.4	608.7	654.5	627.1	786.4	723.1	742
Q96G28	CFAP36	Cilia- and flagella-associated protein 36	Homo sapiens	High	7	160.9	168.2	171.6	178.2	151.1	113	185.4	182.9	163	141.9	156.5
Q9P2B7	CFAP97	Cilia- and flagella-associated protein 97	Homo sapiens	High	3	82	103	80.3	101.9	89.4	121.2	78.8	108.9	103.8	112.3	131.2
Q9UEE9	CFDP1	Craniofacial development protein 1	Homo sapiens	High	14	1390.2	1280.6	1327.2	1313.6	1194.6	1218.8	1365.7	1285.4	1329.5	1304.1	1414.7
P23528	CFL1	Cofilin-1	Homo sapiens	High	20	8615.8	8773.8	8599.5	8033.6	6830.6	7171.8	7591.3	7604.1	9093.4	8473.4	8530.8
Q9UFW8	CGGBP1	CGG triplet repeat-binding protein 1	Homo sapiens	High	10	657.6	621.4	626.6	596.3	502.1	419.7	527.7	473.5	596.5	580.4	609.6
Q8WUX2	CHAC2	Putative glutathione-specific gamma-glutamylcyclotransferase 2	Homo sapiens	High	6	422	462.9	424.2	469.1	482.4	592	380.1	482.3	466.4	500.7	448.2
Q13111	CHAF1A	Chromatin assembly factor 1 subunit A	Homo sapiens	High	33	2166	2150.5	2142.5	2134.1	2011.5	1819.3	2192.4	2324.9	2137.6	2217.4	2196.4
Q13112	CHAF1B	Chromatin assembly factor 1 subunit B	Homo sapiens	High	26	1978	2067.1	2016.6	2032.5	1722.9	1865.2	1906.3	1920.5	2044.3	2052	2014
Q96JM3	CHAMP1	Chromosome alignment-maintaining phosphoprotein 1	Homo sapiens	High	35	2499.3	2530.2	2510.2	2534	2170.1	2218	2581.8	2573.9	2718.9	2548.6	2432.9
Q96BP2	CHCHD1	Coiled-coil-helix-coiled-coil-helix domain-containing protein 1	Homo sapiens	High	2	71.5	64.5	64.8	69.8	81	61	65.5	55.5	61.4	59.9	61.8
Q8WYQ3	CHCHD10	Coiled-coil-helix-coiled-coil-helix domain-containing protein 10, mitochondrial	Homo sapiens	High	1	12.2	11	13.4	10.7	11.7	9.5	7	16.4	12.7	16.4	12.9
Q9Y6H1	CHCHD2	Coiled-coil-helix-coiled-coil-helix domain-containing protein 2	Homo sapiens	High	2	98.2	103.2	113.8	79.9	67.9	43.5	69.7	100.7	95.4	95.8	96.5
Q9NX63	CHCHD3	MICOS complex subunit MIC19	Homo sapiens	High	21	2102.7	2168.1	2099.2	1894	1823.1	2340.4	2007.2	2100.1	2267.4	2277.1	2130
Q8N4Q1	CHCHD4	Mitochondrial intermembrane space import and assembly protein 40	Homo sapiens	High	1	71.4	49	68	124.2	61.2	103.7	48.2	79.7	40.8	83.8	79.5
Q9BRQ6	CHCHD6	MICOS complex subunit MIC25	Homo sapiens	High	7	402.8	403.2	395.1	367.4	386.9	333.2	385	355.6	400.3	405.8	419.2
Q9BUK0	CHCHD7	Coiled-coil-helix-coiled-coil-helix domain-containing protein 7	Homo sapiens	High	2	25	27.5	25.6	20.2	25.9	20.1	17.4	21.4	23.7	24.1	25.4
O14646	CHD1	Chromodomain-helicase-DNA-binding protein 1	Homo sapiens	High	39	2716.6	2826.1	2720.8	2740.8	2935	3034	2803.5	2874	2814.1	2885.1	2789.5
Q86WJ1	CHD1L	Chromodomain-helicase-DNA-binding protein 1-like	Homo sapiens	High	42	2250.9	2244.4	2223.3	2226.8	2173.1	1964.3	2203.7	2222.3	2229.4	2216.4	2178.3
O14647	CHD2	Chromodomain-helicase-DNA-binding protein 2	Homo sapiens	High	22	705.6	722.6	714.6	673	636.6	717.3	680.5	723.5	718	671.7	674.5
Q12873	CHD3	Chromodomain-helicase-DNA-binding protein 3	Homo sapiens	High	45	2607.6	2668.1	2598	2764	2584.2	2724	2605.2	2747.5	2644.1	2677.1	2700.4
Q14839	CHD4	Chromodomain-helicase-DNA-binding protein 4	Homo sapiens	High	83	9341.3	9401.5	9390.8	9383.1	9544	9642.4	9882.9	9765.9	9299.5	9249.9	9038.7
Q8TD26	CHD6	Chromodomain-helicase-DNA-binding protein 6	Homo sapiens	High	18	714.9	738.6	738.5	688	471.4	382.2	617.9	626.3	726.2	702.4	711.2
Q9P2D1	CHD7	Chromodomain-helicase-DNA-binding protein 7	Homo sapiens	High	39	2751.1	2773	2812	2817.1	2636	2747.2	2802.6	2763.6	2748.5	2670.2	2843.3
Q9HCK8	CHD8	Chromodomain-helicase-DNA-binding protein 8	Homo sapiens	High	35	1569.9	1551.9	1549.9	1621.7	1632.7	1538.3	1567.4	1619	1555.3	1550.8	1578.1
Q3L8U1	CHD9	Chromodomain-helicase-DNA-binding protein 9	Homo sapiens	High	26	769.5	771.1	809.3	738.1	799.9	804.8	805.8	757.6	813	809.6	797.4
O14757	CHEK1	Serine/threonine-protein kinase Chk1	Homo sapiens	High	22	1537.3	1542	1667.3	1469.7	1347	1345.6	1294.7	1445.9	1493.5	1484.1	1548.2
O96017	CHEK2	Serine/threonine-protein kinase Chk2	Homo sapiens	High	20	1653.4	1668.5	1653.6	1607.5	1656.5	1720.7	1678.8	1718.1	1699.2	1702	1656.9
Q8IWX8	CHERP	Calcium homeostasis endoplasmic reticulum protein	Homo sapiens	High	22	1967.1	1958.9	1962.4	1867.7	2287.3	1820	2345.8	2294.3	1927.4	1922.2	1859.3
Q15782	CHI3L2	Chitinase-3-like protein 2	Homo sapiens	High	6	357.3	389.1	358.1	297.3	490.7	159.1	245.4	243	294.6	271.5	268.9
Q5VXU3	CHIC1	Cysteine-rich hydrophobic domain-containing protein 1	Homo sapiens	Medium	1	55.6	53.8	61.8	49.9	40.7	50.4	52	55.3	64	49.7	57.4
Q9BWS9	CHID1	Chitinase domain-containing protein 1	Homo sapiens	High	9	941.9	843.2	984.7	977.1	950.3	1024.3	912.4	863.5	926.6	887.2	966.5
P35790	CHKA	Choline kinase alpha	Homo sapiens	High	4	86.9	77.6	79.3	75.7	97.9	103.8	91	83.8	75.7	82.7	79.6
Q9Y259	CHKB	Choline/ethanolamine kinase	Homo sapiens	High	2	57.4	57.7	52.1	64.1	63.4	56.6	57.8	57	52.7	53	54.6
P24386	CHM	Rab proteins geranylgeranyltransferase component A 1	Homo sapiens	High	13	810.1	862.7	848.2	833.7	954.5	845.9	873.3	889.2	805.5	814.5	818.5
P26374	CHML	Rab proteins geranylgeranyltransferase component A 2	Homo sapiens	High	10	383.6	403.8	416.7	387.2	416.3	397.6	428.3	416.4	415.2	393.4	423.1
Q9HD42	CHMP1A	Charged multivesicular body protein 1a	Homo sapiens	High	8	924.9	871.2	849.3	808.1	844.4	771.7	755.1	743.9	788.3	864.8	836.8
Q7LBR1	CHMP1B	Charged multivesicular body protein 1b	Homo sapiens	High	6	584.6	573.3	555.3	545.9	502.6	427.5	495.1	490.6	549.9	547.9	522.4
O43633	CHMP2A	Charged multivesicular body protein 2a	Homo sapiens	High	12	582	585	593.8	624.3	644	690.9	685	699.5	597.2	689.8	593.3
Q9UQN3	CHMP2B	Charged multivesicular body protein 2b	Homo sapiens	High	8	467.9	489.8	469.4	470.6	468.5	566.9	446.4	481.6	468	484.5	459.6
Q9Y3E7	CHMP3	Charged multivesicular body protein 3	Homo sapiens	High	5	162.6	156.5	169.3	153	164.7	163.8	155.6	160.7	146.9	148.5	160.3
Q9BY43	CHMP4A	Charged multivesicular body protein 4a	Homo sapiens	High	11	558.6	483.1	471.6	460.8	493.2	422.3	425.6	487.7	420.8	503.7	439.9
Q9H444	CHMP4B	Charged multivesicular body protein 4b	Homo sapiens	High	19	2270.3	1993.2	1916.7	1871.1	1795.7	1620.3	1770.1	1882.6	1786.4	2178.8	1834.7
Q9NZZ3	CHMP5	Charged multivesicular body protein 5	Homo sapiens	High	9	1062.2	1170.1	1066.1	948	916	875.5	996.9	1002.9	1081.8	1106.7	959
Q96FZ7	CHMP6	Charged multivesicular body protein 6	Homo sapiens	High	5	191.1	195.7	183.7	165	191.7	176.2	169.2	182.2	170.5	207.1	177.5
Q8WUX9	CHMP7	Charged multivesicular body protein 7	Homo sapiens	High	15	778.2	757.8	726.3	708.8	828.9	684.4	773.2	749.1	705.6	781.4	717.5
Q9UHD1	CHORDC1	Cysteine and histidine-rich domain-containing protein 1	Homo sapiens	High	20	2225.5	2339.5	2341.2	2292.5	2346.2	2634.2	2240.4	2257	2398.9	2317.2	2354.7
Q99653	CHP1	Calcineurin B homologous protein 1	Homo sapiens	High	8	243.8	220.6	216.1	237.3	228.1	204.4	194.2	195.4	198.8	208.3	208.2
Q8IZ52	CHPF	Chondroitin sulfate synthase 2	Homo sapiens	High	1	18.9	29.7	21.2	18.6	21.4	30.1	22.1	17.2	23.2	25	47.9
Q9P2E5	CHPF2	Chondroitin sulfate glucuronyltransferase	Homo sapiens	High	12	338.5	350	333.8	365	375.7	312.5	355.1	352.3	330.7	346.9	344.8
Q8WUD6	CHPT1	Cholinephosphotransferase 1	Homo sapiens	High	1	29.8	29.7	30.9	31.7	31.5	31.3	34.2	34.8	34.8	28.2	33.4
Q9NRG0	CHRAC1	Chromatin accessibility complex protein 1	Homo sapiens	High	3	160.4	146.6	148.9	155.9	159.8	147.7	139.4	159.4	152.9	172.8	152.4
O43529	CHST10	Carbohydrate sulfotransferase 10	Homo sapiens	Medium	1	26.2	26	24.1	32.4	25.1	26.2	23.9	25.6	26.1	28.3	34.3
Q9NPF2	CHST11	Carbohydrate sulfotransferase 11	Homo sapiens	High	7	431.5	406.7	398.3	377.9	437.3	294.2	381.6	338.4	395	462	379.7
Q8NCH0	CHST14	Carbohydrate sulfotransferase 14	Homo sapiens	High	7	321.4	304.3	324.5	341.4	286.7	278.3	245.3	268.8	273.9	326.5	342.7
Q9Y4C5	CHST2	Carbohydrate sulfotransferase 2	Homo sapiens	High	5	79	85.3	89.2	88.7	77.3	93.9	93.9	93.2	99	86.6	77.1
Q8WVB6	CHTF18	Chromosome transmission fidelity protein 18 homolog	Homo sapiens	High	21	1059.9	1074.2	1084.8	1008.2	1119.2	965	1095.3	1163.2	1050.5	1010.8	1026
P0CG12	CHTF8	Chromosome transmission fidelity protein 8 homolog isoform 2	Homo sapiens	High	6	411.4	381.4	423.1	402.2	307.4	162.4	467.8	495.3	380.7	349.3	384
P0CG13	CHTF8	Chromosome transmission fidelity protein 8 homolog	Homo sapiens	High	3	77.7	64.4	67.7	68.5	77.2	50.4	65.7	52.3	77.3	50.3	69.6
Q9Y3Y2	CHTOP	Chromatin target of PRMT1 protein	Homo sapiens	High	8	1284.3	1237.9	1317.6	1110.3	857.3	722	1113.9	1040.2	1315.2	1079.9	1302.2
O15111	CHUK	Inhibitor of nuclear factor kappa-B kinase subunit alpha	Homo sapiens	High	21	1374	1402.3	1316.4	1401.9	1537.8	1582.3	1410.5	1464.2	1425.5	1397	1348.1
Q8WUH1	CHURC1	Protein Churchill	Homo sapiens	High	4	70.5	87.4	67.1	83.6	84.3	43.2	82.6	82.4	93	58.2	75.8
O76071	CIAO1	Probable cytosolic iron-sulfur protein assembly protein CIAO1	Homo sapiens	High	10	372	428.9	405.2	437.3	541.4	527.2	469.7	482	409.4	394.6	441.3
Q6FI81	CIAPIN1	Anamorsin	Homo sapiens	High	21	1370.9	1407.6	1301	1435.2	1400.5	1343.3	1359	1299.6	1422	1344.8	1410.5
Q99828	CIB1	Calcium and integrin-binding protein 1	Homo sapiens	High	7	189.1	181.9	186.8	172.8	179.4	129.8	158.9	150.7	178.9	169.4	189.9
Q9BW66	CINP	Cyclin-dependent kinase 2-interacting protein	Homo sapiens	High	5	164.1	159.1	159.4	155	180	133.9	140.1	120.6	142.2	134.6	153
Q86X95	CIR1	Corepressor interacting with RBPJ 1	Homo sapiens	High	8	282.9	276.7	289.2	279.2	182	145.5	240.3	247.9	263.4	248.2	278.6
Q14011	CIRBP	Cold-inducible RNA-binding protein	Homo sapiens	High	11	2135.8	1950.1	2071.2	2057.8	1930.9	2024	2213.5	2170.3	2043.3	2426	2238
Q9NZ45	CISD1	CDGSH iron-sulfur domain-containing protein 1	Homo sapiens	High	5	494	459.9	486.2	503	602.3	599.8	530	490.5	519	469.1	470.4
Q8N5K1	CISD2	CDGSH iron-sulfur domain-containing protein 2	Homo sapiens	High	7	471.3	492.9	482.3	486.8	549.8	484.1	525.9	513.2	517.6	474.3	481
P0C7P0	CISD3	CDGSH iron-sulfur domain-containing protein 3, mitochondrial	Homo sapiens	High	4	467.4	511.9	577.1	459.6	431.4	439.8	405	454	514.1	430.6	493.4
O14578	CIT	Citron Rho-interacting kinase	Homo sapiens	High	36	1400.2	1397.6	1380.7	1407.6	1699.9	1666.7	1494.6	1468.1	1348.1	1256.6	1421.3
Q9ULV3	CIZ1	Cip1-interacting zinc finger protein	Homo sapiens	High	19	874.8	902.6	894.1	858.2	952.6	790	983.9	1008.5	863.4	914.9	858.2
Q8WWK9	CKAP2	Cytoskeleton-associated protein 2	Homo sapiens	High	22	1270.5	1279.9	1241.5	1229.5	1991	2437.9	1483.2	1435.9	1277.6	1262.9	1276.4
Q8IYA6	CKAP2L	Cytoskeleton-associated protein 2-like	Homo sapiens	High	16	649.1	643	644.2	605.8	929.7	918.2	698.7	739.7	663	615.8	645.3
Q07065	CKAP4	Cytoskeleton-associated protein 4	Homo sapiens	High	15	564.7	540.8	550.3	557.1	607.3	549.9	568.5	605.4	540.7	551.7	567.5
Q14008	CKAP5	Cytoskeleton-associated protein 5	Homo sapiens	High	109	11422.5	11816.8	11359.2	11060.1	13824.3	13698.4	12266	12094.3	11166	11349.9	10665.7
P12277	CKB	Creatine kinase B-type	Homo sapiens	High	2	11.3	9.9	10.7	13.1	16.9	12.4	9.9	14	10.5	13.5	13.1
P61024	CKS1B	Cyclin-dependent kinases regulatory subunit 1	Homo sapiens	High	3	603.8	576.5	586	575.4	511.1	434	460.1	473.9	552.8	590.9	576.8
P33552	CKS2	Cyclin-dependent kinases regulatory subunit 2	Homo sapiens	High	2	236	215.6	227	228.5	442.4	261.9	218.6	215.3	204.6	258.3	230.9
Q7Z460	CLASP1	CLIP-associating protein 1	Homo sapiens	High	49	3120.5	3147.9	3080.9	3224.4	3194.6	2967.5	3192.1	3223.1	3084.6	3027.9	3014.9
Q7Z460-3	CLASP1	Isoform 3 of CLIP-associating protein 1	Homo sapiens	High	9	53.3	49.4	58.4	58	56.6	57.2	61.6	53.5	50.6	51.8	60.4
O75122	CLASP2	CLIP-associating protein 2	Homo sapiens	High	40	2141.5	2194	2140.6	2180	2124.1	2111.7	2226.2	2234.3	2182.5	2234.1	2104.6
O75122-3	CLASP2	Isoform 3 of CLIP-associating protein 2	Homo sapiens	High	12	101.7	92.5	107.7	109.7	122.5	97.3	106.4	107.8	96.5	94.6	110.9
Q8N2M8	CLASRP	CLK4-associating serine/arginine rich protein	Homo sapiens	High	6	695.4	671.9	686.1	634.4	553	673.2	687.4	599	686.9	595.2	651.5
A0A0A0MQS2	CLASRP	CLK4-associating serine/arginine-rich protein	Homo sapiens	Medium	1	43.6	49.9	45.1	43.2	44.1	42	35.9	44.4	43.2	42.3	36.7
Q96S66	CLCC1	Chloride channel CLIC-like protein 1	Homo sapiens	High	6	348.2	340.1	349.7	368.5	321.4	349.3	355.3	392.4	368.1	377.3	381.2
P51790	CLCN3	H(+)/Cl(-) exchange transporter 3	Homo sapiens	High	8	578.8	537.8	559.4	645.8	589.4	697.1	540.2	626.7	568.9	628.2	620.3
P51795	CLCN5	H(+)/Cl(-) exchange transporter 5	Homo sapiens	High	3	178	173.2	176	182.9	225	212.1	189.7	206.1	189	221.6	201.3
P51797	CLCN6	Chloride transport protein 6	Homo sapiens	High	1	38.9	35.6	36.1	38.5	35.3	28.7	37.5	37.3	40.5	37.2	38.2
P51798	CLCN7	H(+)/Cl(-) exchange transporter 7	Homo sapiens	High	11	471.5	537	495.4	497.9	544	551.7	444.9	515.8	529.5	527.2	475.6
Q9NY35	CLDND1	Claudin domain-containing protein 1	Homo sapiens	High	3	89.4	77.4	87.7	100	63.5	61.5	69.7	77.3	76.7	84.4	81.2
Q2KHT3	CLEC16A	Protein CLEC16A	Homo sapiens	High	8	200.1	217.8	217.6	280.9	245.3	282.5	260.3	299	223.1	292.8	244.3
O00299	CLIC1	Chloride intracellular channel protein 1	Homo sapiens	High	18	2430.9	2689.5	2789.4	2747.2	2841.3	2496.3	2793.2	2676.6	2697.4	2462.5	2822.5
Q9Y696	CLIC4	Chloride intracellular channel protein 4	Homo sapiens	High	1	76.4	82	66.4	83.8	74.9	105.4	83.7	75.4	81.5	100.3	119.6
Q14677	CLINT1	Clathrin interactor 1	Homo sapiens	High	23	2125.8	2170.4	2122.3	2103.8	1933.8	2179.2	2067.7	2222.6	2194.1	2232.6	2176.7
Q14677-3	CLINT1	Isoform 3 of Clathrin interactor 1	Homo sapiens	Medium	6	317.1	304.7	320.5	299.5	312.5	324.6	321.6	302.9	325	310.8	310.4
P30622	CLIP1	CAP-Gly domain-containing linker protein 1	Homo sapiens	High	44	1955.7	1885	1974.4	1941.2	1998.8	2060.6	2076.4	2040.5	1937.9	1960.2	1990.9
P49759	CLK1	Dual specificity protein kinase CLK1	Homo sapiens	High	7	317.2	326.9	331.9	349.7	331.2	460.5	302.9	334.7	310.5	300.5	331.2
P49760	CLK2	Dual specificity protein kinase CLK2	Homo sapiens	High	6	229.2	215.1	195.4	200.4	181	148.1	183.2	191.4	201.5	183.9	206.2
P49761	CLK3	Dual specificity protein kinase CLK3	Homo sapiens	High	11	575.3	629.8	661.3	652.9	632.2	682.7	601.7	677.4	652.5	644.4	642.2
Q13286	CLN3	Battenin	Homo sapiens	High	2	89.1	84.3	94.2	115.5	96.6	134	83.1	100.8	92.6	107.3	97.8
O75503	CLN5	Ceroid-lipofuscinosis neuronal protein 5	Homo sapiens	High	2	165.1	162.1	168.8	204.3	172.1	227.1	180.2	180.1	182.8	181	195.3
Q9NWW5	CLN6	Ceroid-lipofuscinosis neuronal protein 6	Homo sapiens	High	1	21.5	18.8	20.9	28	30.8	28.5	22.2	23.8	20.6	23.9	22.8
Q9UBY8	CLN8	Protein CLN8	Homo sapiens	High	1	36.6	36.5	33.5	33.6	35.8	43.4	38.4	35	36.8	31.4	28.4
P54105	CLNS1A	Methylosome subunit pICln	Homo sapiens	High	7	405.9	353.3	401.5	427.6	466.1	561.6	408.2	405.1	370.2	382.4	403
Q92989	CLP1	Polyribonucleotide 5'-hydroxyl-kinase Clp1	Homo sapiens	High	12	747.1	779.8	789.6	749.7	863	869.5	822.2	761.5	776.1	771.1	781.9
Q9H078-2	CLPB	Isoform 2 of Caseinolytic peptidase B protein homolog	Homo sapiens	Medium	8	27.1	29.1	24.8	20.8	17.3	19.7	23.2	25	26.6	24.8	28.5
Q9H078	CLPB	Caseinolytic peptidase B protein homolog	Homo sapiens	High	24	2198.1	2105.4	2188	2007.1	1940.3	1706.8	2130.4	2075.9	2084.5	2017.2	2056.1
Q16740	CLPP	ATP-dependent Clp protease proteolytic subunit, mitochondrial	Homo sapiens	High	10	920.2	836.1	869.5	815	1131.7	742.1	776.1	750.5	846.3	749.7	835.5
O96005	CLPTM1	Cleft lip and palate transmembrane protein 1	Homo sapiens	High	11	608.6	621.6	561.7	691.9	761.5	783.8	661.3	702.7	640.4	717.5	664.8
Q96KA5	CLPTM1L	Cleft lip and palate transmembrane protein 1-like protein	Homo sapiens	High	10	475.8	485.8	475.9	515.5	536	613.8	495.1	535.6	501.4	543	504.7
O76031	CLPX	ATP-dependent Clp protease ATP-binding subunit clpX-like, mitochondrial	Homo sapiens	High	29	2219.1	2272.8	2258.8	2179.2	2112.5	2110	2138.8	2113.4	2232.4	2110.1	2152
Q9HAW4	CLSPN	Claspin	Homo sapiens	High	20	1072.1	1082.4	1091.6	993	706.3	403	904.7	917.6	1020.9	1030.7	1125.8
O94985	CLSTN1	Calsyntenin-1	Homo sapiens	High	3	104.1	107.8	100.3	109.4	91	68.8	94	93.5	115.9	107.3	106.8
Q9BQT9	CLSTN3	Calsyntenin-3	Homo sapiens	High	3	31.2	32.2	28.1	34.1	23.4	22.5	33.2	31.4	34.2	36.8	31.5
P09496	CLTA	Clathrin light chain A	Homo sapiens	High	11	639.9	722.5	719.4	612.2	681.7	510.4	617.4	548.8	628.4	625.2	637
P09496-2	CLTA	Isoform Non-brain of Clathrin light chain A	Homo sapiens	High	3	185.2	178.5	199.3	168.7	208.2	161.1	156.5	255.5	159.5	131.4	163.5
P09497	CLTB	Clathrin light chain B	Homo sapiens	High	8	453.6	413	423.9	435.2	420	395.4	428	394.7	352.3	406.2	401.2
Q00610	CLTC	Clathrin heavy chain 1	Homo sapiens	High	90	11256.7	11420.7	11161.3	11303.2	12854.3	11262.9	12132.5	12363.4	11303.6	11351.8	11419.2
P10909	CLU	Clusterin	Homo sapiens	High	1	16.8	15.8	12.3	14.8	20.6	22.5	22.8	19.3	13.3	15.3	19.5
Q96AJ1	CLUAP1	Clusterin-associated protein 1	Homo sapiens	High	1	21.1	17.8	17.2	17.6	14.5	14.1	19.4	11.5	16.7	17.7	16.5
I3L2B0	CLUH	Clustered mitochondria protein homolog (Fragment)	Homo sapiens	High	21	1807.5	1801.3	1770.9	1662.4	2002.9	1783.4	1797.9	1852.6	1714.2	1715.8	1691.6
O75153	CLUH	Clustered mitochondria protein homolog	Homo sapiens	High	59	2347.4	2460.1	2363.1	2200.8	2834.4	2453.5	2567.6	2643.1	2333.8	2347.8	2263.8
Q8N0X4	CLYBL	Citrate lyase subunit beta-like protein, mitochondrial	Homo sapiens	High	4	125.9	124	140.9	133.9	120.6	110.4	117	107.9	122.4	119.6	132.6
Q8NFW8	CMAS	N-acylneuraminate cytidylyltransferase	Homo sapiens	High	22	1694.1	1579.8	1670.7	1638.3	1603.7	1493	1620.9	1544.1	1608.6	1562.3	1650.6
Q7Z7K0	CMC1	COX assembly mitochondrial protein homolog	Homo sapiens	High	1	78.3	90.4	88.4	86.3	99	79.9	84	86.2	69.8	98.2	90
Q9NRP2	CMC2	COX assembly mitochondrial protein 2 homolog	Homo sapiens	High	2	122.2	107.2	92.6	109.9	96	93.6	107.7	108.2	100.2	127.9	97.9
Q8IY22	CMIP	C-Maf-inducing protein	Homo sapiens	High	4	243.3	253.9	227.5	268.9	222.8	174.6	251	276.8	248.5	232.5	250.4
P30085	CMPK1	UMP-CMP kinase	Homo sapiens	High	12	2019.3	1972.5	2015.9	1826.4	1912.1	1860.5	1918	1638.6	2026.5	1947.4	2000.5
Q5EBM0	CMPK2	UMP-CMP kinase 2, mitochondrial	Homo sapiens	High	8	418	419.9	398.5	411.3	442.6	406.3	401	429.1	434.6	405.8	419.8
Q9BQ75	CMSS1	Protein CMSS1	Homo sapiens	High	9	786.6	813.3	830.4	777.4	803.7	776.7	823.2	829	816.3	769.4	758.4
Q96MX0	CMTM3	CKLF-like MARVEL transmembrane domain-containing protein 3	Homo sapiens	High	2	147.7	137.1	128.6	166.4	141.3	167.4	137.5	143.7	143.3	167.9	165.7
Q9NX76	CMTM6	CKLF-like MARVEL transmembrane domain-containing protein 6	Homo sapiens	High	2	292.3	278.3	247	251.5	263.2	285.8	246	257.7	281.7	298.4	240.9
Q8N1G2	CMTR1	Cap-specific mRNA (nucleoside-2'-O-)-methyltransferase 1	Homo sapiens	High	27	1893.9	1821.9	1917.6	1889.7	1966.6	1729.1	1957.7	1861.6	1844.1	1714.2	1893.1
Q8IYT2	CMTR2	Cap-specific mRNA (nucleoside-2'-O-)-methyltransferase 2	Homo sapiens	High	7	281.9	287.7	310.2	308.3	305.8	321.4	306.1	308.8	307.5	283.1	310.1
P62633	CNBP	Cellular nucleic acid-binding protein	Homo sapiens	High	11	929.3	1491.5	1421.6	1398.1	1209.1	1444	1581.4	1495.5	1541.6	1344.2	1547.2
P62633-4	CNBP	Isoform 4 of Cellular nucleic acid-binding protein	Homo sapiens	High	3	13.1	29.5	24.8	24	22.5	19.4	21.1	19.6	28.5	13.3	23.1
P62633-6	CNBP	Isoform 6 of Cellular nucleic acid-binding protein	Homo sapiens	High	3	8	15.6	11	12.7	13.7	17	15.7	12	13.2	8.7	15.2
Q96KP4	CNDP2	Cytosolic non-specific dipeptidase	Homo sapiens	High	24	2373.5	2328.9	2338	2324.6	2028.3	2387.6	2155.5	2189	2362	2217.8	2353.2
Q9P003	CNIH4	Protein cornichon homolog 4	Homo sapiens	High	1	48.9	45.2	52.1	53.8	61.7	78.7	51.3	64.1	47.1	67.7	46.4
Q8WXI2	CNKSR2	Connector enhancer of kinase suppressor of ras 2	Homo sapiens	High	2	26.3	22	27	29.2	23	24.9	24.3	31.2	23.3	21.5	23.5
Q99439	CNN2	Calponin-2	Homo sapiens	High	14	1124.8	1264.7	1135.5	1204.3	1112.6	972.3	1141.2	1204.5	1326.2	1202	1189.2
Q15417	CNN3	Calponin-3	Homo sapiens	High	1	11.7	12.5	12.4	16.5	10.8	15.7	14	18	14.8	10.3	16.3
Q9H8M5	CNNM2	Metal transporter CNNM2	Homo sapiens	High	1	32.2	30.6	33	40.8	45.7	46.9	30.4	38.6	25.8	25.7	37.7
Q8NE01	CNNM3	Metal transporter CNNM3	Homo sapiens	High	17	787.9	747.3	762.3	776.6	710.8	694.1	714	721.9	713.5	739.6	744.5
Q6P4Q7	CNNM4	Metal transporter CNNM4	Homo sapiens	High	2	55.6	49.8	66.7	57.9	60.6	50.5	62.3	68.3	64.8	50.4	58.8
A5YKK6-2	CNOT1	Isoform 2 of CCR4-NOT transcription complex subunit 1	Homo sapiens	Medium	21	1005.2	978.6	964.6	963.9	1067.4	903.2	1018.7	1056.8	901	972.1	977.1
A5YKK6	CNOT1	CCR4-NOT transcription complex subunit 1	Homo sapiens	High	79	4924.6	4852.8	4675.6	4834.6	5458.5	4370.1	5133.8	5223.9	4628.4	4769.8	4636.8
Q9H9A5	CNOT10	CCR4-NOT transcription complex subunit 10	Homo sapiens	High	17	1168.8	1170.6	1185.9	1159.2	1186.4	1100.8	1231.6	1194.5	1120.5	1172.2	1143.8
Q9UKZ1	CNOT11	CCR4-NOT transcription complex subunit 11	Homo sapiens	High	8	414.1	375.4	381.6	394.7	398.6	332.1	369.9	362.3	388.9	381.3	380.2
Q9NZN8	CNOT2	CCR4-NOT transcription complex subunit 2	Homo sapiens	High	9	512.6	550.1	498.6	531.7	529.9	486.9	518.1	584.5	552.5	524.9	512.6
O75175	CNOT3	CCR4-NOT transcription complex subunit 3	Homo sapiens	High	19	1198	1195.3	1200.2	1172.2	1203.4	1156.4	1217.3	1303.7	1160.3	1286.6	1202.2
O95628	CNOT4	CCR4-NOT transcription complex subunit 4	Homo sapiens	High	11	499.7	511.9	520.1	519.9	537	479.8	527.1	539.7	486.8	510.2	530.2
Q96LI5	CNOT6L	CCR4-NOT transcription complex subunit 6-like	Homo sapiens	High	11	442	424.2	428	428.9	411.5	398.7	392.4	406.5	420.6	407.7	420.2
Q9UIV1	CNOT7	CCR4-NOT transcription complex subunit 7	Homo sapiens	High	8	387.3	397.7	400.1	391.1	412.4	375.1	416	402.8	399.9	366.6	393.4
Q9UFF9	CNOT8	CCR4-NOT transcription complex subunit 8	Homo sapiens	High	3	34.7	29.4	34.6	35.4	30.4	27.2	22.9	33.8	30.3	26.8	39.2
P09543	CNP	2',3'-cyclic-nucleotide 3'-phosphodiesterase	Homo sapiens	High	23	2673.7	2812.1	2586.9	2723.8	2300.3	2549	2364.8	2522.2	2737.9	2810.5	2610.2
Q9Y2B0	CNPY2	Protein canopy homolog 2	Homo sapiens	High	10	717.3	651.6	704.6	677.7	689	708.8	637.5	620.9	638.8	678.8	651.6
Q9BT09	CNPY3	Protein canopy homolog 3	Homo sapiens	High	10	980	868.6	980.8	1002.1	889	979.1	910.5	871.5	906.7	842	928.8
Q6PJW8	CNST	Consortin	Homo sapiens	High	7	353.7	334.9	359.7	388.3	405.9	428.3	393.2	395.2	348	387.2	367
Q9NXG0	CNTLN	Centlein	Homo sapiens	High	2	52	60.3	55.5	47.5	56.4	60.3	50.6	58.6	48.9	45.1	53.8
Q8N137	CNTROB	Centrobin	Homo sapiens	Medium	1	31.5	26.3	31.7	23.9	22.2	23.6	26.6	25.2	30.5	27.3	26.1
Q9GZY4	COA1	Cytochrome c oxidase assembly factor 1 homolog	Homo sapiens	High	3	119.8	118.4	113.3	116.5	109.5	122.8	109.7	124.4	115.3	105.9	118.6
Q9Y2R0	COA3	Cytochrome c oxidase assembly factor 3 homolog, mitochondrial	Homo sapiens	High	3	224.2	200	215.9	180.8	250.6	144.2	192.4	189.6	151.1	184.5	176.9
Q9NYJ1	COA4	Cytochrome c oxidase assembly factor 4 homolog, mitochondrial	Homo sapiens	High	2	86.6	77.7	81.6	82.9	87.6	59.9	72.7	67.2	73.6	84.8	86.5
Q5JTJ3	COA6	Cytochrome c oxidase assembly factor 6 homolog	Homo sapiens	High	3	151.5	143.6	144.2	137.8	150.8	116.9	127	142.7	145.3	175.3	154.8
Q96BR5	COA7	Cytochrome c oxidase assembly factor 7	Homo sapiens	High	9	668.6	659.3	698.1	637.8	577.1	498.7	618.5	575.3	671.9	594.2	641.8
Q13057	COASY	Bifunctional coenzyme A synthase	Homo sapiens	High	13	664.1	630.9	613.3	668.4	792.9	648.2	638.1	651.1	627	641.7	609.1
Q8WTW3	COG1	Conserved oligomeric Golgi complex subunit 1	Homo sapiens	High	25	877.6	958	893	891.7	980.9	865.3	946.9	953.8	894.5	898.4	888.1
Q14746	COG2	Conserved oligomeric Golgi complex subunit 2	Homo sapiens	High	23	924.2	891	895.2	963.8	1003.9	892.5	971.8	1010.9	846.8	833.2	904.5
Q96JB2	COG3	Conserved oligomeric Golgi complex subunit 3	Homo sapiens	High	21	874.6	885.7	860.3	847.7	1002.3	833.1	959.5	956.7	872.7	823.4	797.8
Q9H9E3	COG4	Conserved oligomeric Golgi complex subunit 4	Homo sapiens	High	18	808.5	767.4	779.4	750.9	933	645.3	860.9	799.4	731.3	708.3	750.5
Q9UP83-2	COG5	Isoform 2 of Conserved oligomeric Golgi complex subunit 5	Homo sapiens	Medium	10	30.1	24.6	30.6	28.2	29.5	24.1	27.2	27.1	28.9	32.4	29.1
Q9UP83	COG5	Conserved oligomeric Golgi complex subunit 5	Homo sapiens	High	24	1131.7	1061.2	1085.4	1031.1	1281.5	985.9	1206.3	1137.5	1049.7	1037.6	1058.9
U3KQU7	COG5	Conserved oligomeric Golgi complex subunit 5 (Fragment)	Homo sapiens	Medium	2	16.2	17.7	20.2	16.9	23.5	14	19.1	17.7	19.6	12.4	19.3
Q9Y2V7	COG6	Conserved oligomeric Golgi complex subunit 6	Homo sapiens	High	11	664.3	626.8	682.3	654.2	675.6	547.5	640.1	585.5	625	586.4	628.1
P83436	COG7	Conserved oligomeric Golgi complex subunit 7	Homo sapiens	High	26	1084	1014.6	1006	1013.8	1211.2	946.1	1087.4	1067.9	985	1015.9	979.4
Q96MW5	COG8	Conserved oligomeric Golgi complex subunit 8	Homo sapiens	High	10	266.7	251.8	242.9	267.7	353.7	225.4	289.9	272.2	256.6	264.7	264.4
P38432	COIL	Coilin	Homo sapiens	High	14	853.5	846.3	835.6	841.5	764.3	805.2	829.6	791.2	843.9	815	823.7
Q5TAT6	COL13A1	Collagen alpha-1(XIII) chain	Homo sapiens	Medium	1	59.2	51.7	50.9	38.8	15.2	42.6	59	43.3	63.3	65.1	56.6
H7C457	COL18A1	Collagen alpha-1(XVIII) chain (Fragment)	Homo sapiens	Medium	1	13.3	15.9	16.6	15.9	25.3	16.8	21.9	24	14.4	15	19.1
Q14993	COL19A1	Collagen alpha-1(XIX) chain	Homo sapiens	High	2	43.6	43.3	40.5	40.1	49.4	39.9	47.2	43.6	53.9	44.7	44
P08123	COL1A2	Collagen alpha-2(I) chain	Homo sapiens	High	2	30	25.9	29	28.6	39.9	39.8	29.5	37.2	30.9	37.8	26.2
P02458	COL2A1	Collagen alpha-1(II) chain	Homo sapiens	Medium	1	84.8	79.8	86.2	102.5	15.1	100.4	80.2	104.1	86.9	70.6	88.2
P02461	COL3A1	Collagen alpha-1(III) chain	Homo sapiens	High	5	49.5	63.5	56.1	39.6	139.6	50.5	54.7	50	72.8	60.3	47.7
Q01955	COL4A3	Collagen alpha-3(IV) chain	Homo sapiens	Medium	1	8.9	14.8	16.4	13.5	13.9	9.5	13.8	18.4	9.4	13.4	12.5
Q9Y5P4	COL4A3BP	Collagen type IV alpha-3-binding protein	Homo sapiens	High	30	1870.6	1827.8	1873.9	1834.5	1760.5	1759.6	1788.9	1837.7	1770.5	1669.6	1860.6
P12111	COL6A3	Collagen alpha-3(VI) chain	Homo sapiens	High	3	159.4	190.8	159	145.1	88.5	147	157.4	156.6	179.6	148.3	154
Q8NBJ5	COLGALT1	Procollagen galactosyltransferase 1	Homo sapiens	High	19	1039.8	990.9	1027.3	1117.5	1056.7	1116	1040.8	1209.7	981	932.9	1071.7
Q8N668	COMMD1	COMM domain-containing protein 1	Homo sapiens	High	5	321.7	273.5	292.3	281.1	329.9	247.1	265.9	229.8	268.4	270.1	287
Q9Y6G5	COMMD10	COMM domain-containing protein 10	Homo sapiens	High	5	186.2	176.8	163.9	152.6	174.4	118	136	143.7	169.5	155.9	170.8
Q86X83	COMMD2	COMM domain-containing protein 2	Homo sapiens	High	7	324.6	306.7	298.6	298.7	300	279.6	275.3	270.8	305.6	294.3	298.4
Q9UBI1	COMMD3	COMM domain-containing protein 3	Homo sapiens	High	8	324	329.8	325.3	328.3	376.4	281	317.4	290.5	349.9	315.1	363.8
Q9H0A8	COMMD4	COMM domain-containing protein 4	Homo sapiens	High	8	625.7	558.7	547.7	542.5	636.6	541.1	529	529	587.5	561.4	604.7
Q9GZQ3	COMMD5	COMM domain-containing protein 5	Homo sapiens	High	1	17.7	25.3	22.9	22.8	29.8	20.4	21.8	19.8	20.2	19.5	21.3
Q7Z4G1	COMMD6	COMM domain-containing protein 6	Homo sapiens	High	5	280.8	271	290.3	288.1	295.5	251.1	249.1	231.3	260.4	280.2	317.7
Q86VX2	COMMD7	COMM domain-containing protein 7	Homo sapiens	High	6	221.4	205.8	209.2	191.1	208.4	184.1	174.6	183.2	212.1	214.1	213.5
Q9NX08	COMMD8	COMM domain-containing protein 8	Homo sapiens	High	5	294	292.5	278.8	271.8	338.6	250.7	246.4	229.1	285.1	270.6	285.6
Q9P000	COMMD9	COMM domain-containing protein 9	Homo sapiens	High	6	255.3	240.8	205.8	211.7	269.7	169.4	211.6	177.7	243.7	231.4	246.4
P21964	COMT	Catechol O-methyltransferase	Homo sapiens	High	17	1990.8	1999.4	2032.3	2065	2118	2173.1	1999.4	1906.2	2078.9	1940	2040.2
Q86VU5	COMTD1	Catechol O-methyltransferase domain-containing protein 1	Homo sapiens	High	1	16.7	23.3	25	17.5	23.5	14.9	24.5	24.7	23.5	23.7	14.9
P53621	COPA	Coatomer subunit alpha	Homo sapiens	High	71	7066.8	6942.1	6992.6	7233.8	7354.5	7222.2	7187	6933.1	7131.1	7268.6	6969.8
P53618	COPB1	Coatomer subunit beta	Homo sapiens	High	47	5195	5309.1	5252.1	5303.3	5508	5517.8	5463.5	5411.5	5283.1	5350.6	5221
P35606	COPB2	Coatomer subunit beta'	Homo sapiens	High	50	5365.9	5406.6	5582.8	5227.3	6004.8	5228	5937.2	5706.1	5386.4	5119.3	5174.1
O14579	COPE	Coatomer subunit epsilon	Homo sapiens	High	19	1339.2	1312.3	1300.3	1293.8	1431.1	1008.5	1120.8	1115.9	1263.8	1170.6	1359.6
Q9Y678	COPG1	Coatomer subunit gamma-1	Homo sapiens	High	41	3884.7	4105.9	4078.6	4192	4395.5	4031	4290.3	4192.4	4013.1	3914.5	3996.1
Q9UBF2	COPG2	Coatomer subunit gamma-2	Homo sapiens	High	25	1842.1	1799	1835.2	1825.3	1931.4	1937.4	1815	1871.3	1828.7	1797.2	1759.1
Q9NQ92	COPRS	Coordinator of PRMT5 and differentiation stimulator	Homo sapiens	High	4	108.2	117.2	116.9	120.1	107.9	143	110.5	97.8	108	89.4	110
P61201	COPS2	COP9 signalosome complex subunit 2	Homo sapiens	High	22	2040.7	2032.8	2078.7	2120	2189	2300.9	2079.3	2146.4	2056.3	2059.3	2048.8
Q9UNS2	COPS3	COP9 signalosome complex subunit 3	Homo sapiens	High	16	1677.2	1683.2	1661.2	1669.2	1796.1	1429.1	1643.2	1507.9	1649	1531.7	1632.2
Q9BT78	COPS4	COP9 signalosome complex subunit 4	Homo sapiens	High	24	2246.6	2244.6	2271.4	2051.4	2532.9	1719	1912.1	1787.9	2032	1953.5	2063.4
Q92905	COPS5	COP9 signalosome complex subunit 5	Homo sapiens	High	18	1963.2	1990.7	2016.7	1906.7	2034.8	1820.8	1921.4	1825.4	2054	1884	1988.4
Q7L5N1	COPS6	COP9 signalosome complex subunit 6	Homo sapiens	High	12	1013.9	1097.2	1094.2	1048.1	1318.8	1026.3	1215.8	1142.8	1168.3	1060.1	1124.3
Q9UBW8	COPS7A	COP9 signalosome complex subunit 7a	Homo sapiens	High	11	776.9	740	735.6	732.1	866.5	689.2	651.2	660.1	683	674.8	743.5
Q9H9Q2	COPS7B	COP9 signalosome complex subunit 7b	Homo sapiens	High	9	642.4	651	668.2	566.2	607.3	520.4	580.2	537.3	619.5	642.7	617
Q99627	COPS8	COP9 signalosome complex subunit 8	Homo sapiens	High	7	935.1	924	882.3	885.6	909.2	924.4	901.1	845.8	969.5	890.4	889.8
P61923	COPZ1	Coatomer subunit zeta-1	Homo sapiens	High	7	462.5	435.8	426.7	413.9	467.7	339.4	422.8	360.9	416.6	397.5	503.7
Q96H96	COQ2	4-hydroxybenzoate polyprenyltransferase, mitochondrial	Homo sapiens	High	1	144.7	146.6	129.2	114.7	138.6	126.5	118.9	112.3	141.8	114.8	134.5
Q9NZJ6	COQ3	Ubiquinone biosynthesis O-methyltransferase, mitochondrial	Homo sapiens	High	6	491	522.4	490.4	480	476.8	473.8	452.9	443.8	529.1	483.1	475.6
Q9Y3A0	COQ4	Ubiquinone biosynthesis protein COQ4 homolog, mitochondrial	Homo sapiens	High	5	30.5	36.9	31.1	36	35.5	31.1	36.4	34.3	38.2	35.5	37.8
Q5HYK3	COQ5	2-methoxy-6-polyprenyl-1,4-benzoquinol methylase, mitochondrial	Homo sapiens	High	17	961.8	890	977.6	996.4	1014	928.7	903.1	887.6	917.1	874.2	971.7
Q9Y2Z9	COQ6	Ubiquinone biosynthesis monooxygenase COQ6, mitochondrial	Homo sapiens	High	7	426.6	404.8	423.8	427.8	510.9	446.3	416.1	431.2	415.3	396.1	404.4
Q99807	COQ7	5-demethoxyubiquinone hydroxylase, mitochondrial	Homo sapiens	High	4	168	181.1	170.4	157.8	201.8	163.3	158.1	160.6	189.3	166.7	172
Q8NI60	COQ8A	Atypical kinase COQ8A, mitochondrial	Homo sapiens	High	9	536.3	528.6	540.8	511.3	615.3	532.1	524	533.1	508.4	501.6	513.4
Q96D53	COQ8B	Atypical kinase COQ8B, mitochondrial	Homo sapiens	High	10	241.4	248.3	249.7	273.1	256.6	241.5	306.9	327.8	306.6	262.9	268.5
O75208	COQ9	Ubiquinone biosynthesis protein COQ9, mitochondrial	Homo sapiens	High	8	897	939.8	868.2	741.9	757.6	639.8	701.7	655.9	760.4	719.5	803.5
P31146	CORO1A	Coronin-1A	Homo sapiens	High	34	6623.1	6503.2	6818.5	6376.7	5837.9	6046.4	6461.2	5991.8	6359.4	6119.2	6568.2
Q9BR76	CORO1B	Coronin-1B	Homo sapiens	High	11	378.8	372.4	369.5	344.1	370.7	299.9	319.4	315.7	326.8	329.1	344.6
Q9ULV4	CORO1C	Coronin-1C	Homo sapiens	High	23	1903	1978.4	2008.1	1980.7	1876.7	1859.9	2106.7	1994.7	1968.2	1813.1	2023.2
Q92828	CORO2A	Coronin-2A	Homo sapiens	High	4	72.6	79.2	79.3	66.1	76	62.8	76	80.4	70.8	63.9	69.4
P57737	CORO7	Coronin-7	Homo sapiens	High	27	1424.7	1491.3	1446.6	1493.1	1538.7	1444.2	1569.9	1562.7	1482.1	1424.4	1478.2
Q14019	COTL1	Coactosin-like protein	Homo sapiens	Medium	1	80	70.5	80.4	81.3	104	76.3	74.5	59.9	81.1	74.3	91.3
Q12887	COX10	Protoheme IX farnesyltransferase, mitochondrial	Homo sapiens	High	3	214.6	233.5	189.1	167.9	162.2	181.3	180.8	197.1	228.4	189.7	203.6
Q9Y6N1	COX11	Cytochrome c oxidase assembly protein COX11, mitochondrial	Homo sapiens	High	7	301.4	279.2	291.1	313.5	349.1	306.9	284.4	293	295.1	282.4	333.7
Q7KZN9	COX15	Cytochrome c oxidase assembly protein COX15 homolog	Homo sapiens	High	7	579.6	539.5	542.2	679	557.2	613.2	530.4	636.9	536.5	660.8	615
Q9P0S2	COX16	Cytochrome c oxidase assembly protein COX16 homolog, mitochondrial	Homo sapiens	High	1	37	29.2	34.4	24.7	33	16.4	20.3	18.8	25.3	19.8	26.8
Q14061	COX17	Cytochrome c oxidase copper chaperone	Homo sapiens	High	1	39.6	44.2	48.5	39	46.6	26.9	45.5	42.7	42	39.6	45.7
Q8N8Q8	COX18	Mitochondrial inner membrane protein COX18	Homo sapiens	High	2	113.3	96.8	117	109	101.8	86	114.6	85.2	87.9	87.8	100.7
Q49B96	COX19	Cytochrome c oxidase assembly protein COX19	Homo sapiens	High	2	119.8	107.9	111.1	121.5	104.9	126.8	114	150.8	102.3	168.9	116.9
Q5RI15	COX20	Cytochrome c oxidase protein 20 homolog	Homo sapiens	High	3	272.1	273.9	268.6	231.8	306.1	227.4	269.5	237.5	299.7	228.1	257.1
P13073	COX4I1	Cytochrome c oxidase subunit 4 isoform 1, mitochondrial	Homo sapiens	High	12	2956.6	3012.9	2903.7	2844.7	2776.5	2806.8	2686.8	2616.1	2973.6	3096.6	2987.3
P20674	COX5A	Cytochrome c oxidase subunit 5A, mitochondrial	Homo sapiens	High	5	781.1	811.1	784.4	741	827.1	641.6	683.8	651.8	844.2	701	783.4
P10606	COX5B	Cytochrome c oxidase subunit 5B, mitochondrial	Homo sapiens	High	8	1033.4	1045.8	1102.4	943.2	1134.1	831.9	850.7	778.9	994.5	921.4	1073.2
P14854	COX6B1	Cytochrome c oxidase subunit 6B1	Homo sapiens	High	5	121.8	138.8	125.4	127	138.5	139.6	115.7	140.3	136.6	148.4	134.6
P09669	COX6C	Cytochrome c oxidase subunit 6C	Homo sapiens	High	5	647	604	588.2	533.9	734	422.4	505	457.8	490.7	597.3	460
P14406	COX7A2	Cytochrome c oxidase subunit 7A2, mitochondrial	Homo sapiens	High	2	231.6	236.4	250.4	225.5	270.4	189.2	195.6	223.4	197	247	222.7
O14548	COX7A2L	Cytochrome c oxidase subunit 7A-related protein, mitochondrial	Homo sapiens	High	4	393.7	354.9	362.8	339.6	452	310.5	329.8	303.9	382.8	314.9	376.5
P24311	COX7B	Cytochrome c oxidase subunit 7B, mitochondrial	Homo sapiens	High	2	406.5	412.5	377.4	358.1	303.7	302	277.4	307.4	412.5	362.7	383.6
P15954	COX7C	Cytochrome c oxidase subunit 7C, mitochondrial	Homo sapiens	High	2	234.9	287.8	270.9	280.2	326.5	234.5	242.3	229.2	309.1	300.7	290
P10176	COX8A	Cytochrome c oxidase subunit 8A, mitochondrial	Homo sapiens	Medium	1	143.1	148.4	155.1	152.7	148.8	189.4	130.6	123.2	171.7	146.6	153.4
O75976	CPD	Carboxypeptidase D	Homo sapiens	High	17	923.2	885.9	932	953.8	957.1	942.1	946.2	872.9	918	895.2	931.6
Q99829	CPNE1	Copine-1	Homo sapiens	High	18	1969.6	1947.1	2005.4	1929.1	1822.5	1816	1867.8	1872.4	1971.9	1943.1	1955.9
O75131	CPNE3	Copine-3	Homo sapiens	High	27	1875.5	2049.2	2040.9	2127.4	2230.4	2238.7	2210.3	2199.6	2155.2	2104.4	2035.6
P36551	CPOX	Oxygen-dependent coproporphyrinogen-III oxidase, mitochondrial	Homo sapiens	High	21	1422.2	1444.5	1515.2	1503.2	1575.3	1306.7	1491.6	1485.2	1499.3	1468.5	1501.5
Q9BRF8	CPPED1	Serine/threonine-protein phosphatase CPPED1	Homo sapiens	High	8	346.1	350.1	340.7	354.9	355.5	435.3	355.8	358.7	341.3	369.2	385.1
Q9Y646	CPQ	Carboxypeptidase Q	Homo sapiens	High	3	117.8	112.3	121.4	107.6	114.1	100.2	110	103.4	112.6	104.6	105.5
P31327	CPS1	Carbamoyl-phosphate synthase [ammonia], mitochondrial	Homo sapiens	High	20	706.1	644.1	651.7	650.2	698.2	664.7	643.9	666.8	680.6	627.9	657.4
Q10570	CPSF1	Cleavage and polyadenylation specificity factor subunit 1	Homo sapiens	High	44	2315.1	2303	2350.4	2411.8	2432	2448.8	2320.6	2334.2	2335.8	2251.3	2328.1
Q9P2I0	CPSF2	Cleavage and polyadenylation specificity factor subunit 2	Homo sapiens	High	37	1709.4	1808.2	1729.1	1893.7	1991.2	1991.6	1975.1	2034.3	1847.8	1809	1953.5
Q9UKF6	CPSF3	Cleavage and polyadenylation specificity factor subunit 3	Homo sapiens	High	29	1455.8	1393.5	1472.7	1466.3	1607.2	1463.2	1567.5	1515.5	1517.7	1418.9	1530.5
Q5TA45	CPSF3L	Integrator complex subunit 11	Homo sapiens	High	18	1774.1	1709.4	1721.8	1807.7	2133.3	2160.8	1742.4	1874.1	1779.4	1768.2	1794.2
O95639	CPSF4	Cleavage and polyadenylation specificity factor subunit 4	Homo sapiens	High	11	620.6	659.9	645.6	692.7	671.7	750.3	672.7	703.8	695.6	598	683.3
Q16630	CPSF6	Cleavage and polyadenylation specificity factor subunit 6	Homo sapiens	High	15	1592	1606.6	1604	1725.4	1655.3	1987	1886.3	2014.3	1610	1975	1658.9
Q8N684	CPSF7	Cleavage and polyadenylation specificity factor subunit 7	Homo sapiens	High	12	779.6	740.2	755.3	776.8	710.8	768.9	698.1	738	740.2	702.4	769.7
P50416	CPT1A	Carnitine O-palmitoyltransferase 1, liver isoform	Homo sapiens	High	27	2351.3	2300.7	2324.2	2499.5	2641.6	2731.7	2385.2	2347	2325.4	2501	2375.8
P23786	CPT2	Carnitine O-palmitoyltransferase 2, mitochondrial	Homo sapiens	High	35	2435.7	2444.1	2417	2555	2501	2609.1	2551.3	2576.8	2586.1	2426.5	2505.9
Q9BSW2-2	CRACR2A	Isoform 2 of EF-hand calcium-binding domain-containing protein 4B	Homo sapiens	Medium	4	30.4	28.2	25.3	22.9	20	15.9	21.5	16.6	24.8	17.7	27.9
Q9BSW2	CRACR2A	EF-hand calcium-binding domain-containing protein 4B	Homo sapiens	High	8	288	319	298.6	291	289.4	286.8	310.6	329.7	326.8	294	303.4
P78560	CRADD	Death domain-containing protein CRADD	Homo sapiens	High	3	260.3	222.6	241.2	216.3	261.9	168.1	199.8	193.6	231.9	207.6	228.8
Q96RY5	CRAMP1	Protein cramped-like	Homo sapiens	High	4	110.3	94.1	111.4	102.3	105.4	87.5	95.6	94.8	98.2	105.1	102.4
Q96SW2	CRBN	Protein cereblon	Homo sapiens	High	9	252	251.2	254.5	254.4	251.1	267.7	254.7	268.6	248.7	233.9	258.4
O75575	CRCP	DNA-directed RNA polymerase III subunit RPC9	Homo sapiens	High	2	63.8	69.1	72.3	61.4	66.3	63.8	59.4	75.3	58.9	69.2	62.6
P16220	CREB1	Cyclic AMP-responsive element-binding protein 1	Homo sapiens	High	6	199.8	212.1	213.7	193.9	172.6	157.4	186.8	207.9	226.9	208.6	214.8
Q92793	CREBBP	CREB-binding protein	Homo sapiens	High	19	1644	1726.3	1728.3	1672.7	1793.2	1628.3	1910.2	1977.3	1682.6	1542.9	1669.1
Q6UXH1	CRELD2	Cysteine-rich with EGF-like domain protein 2	Homo sapiens	High	1	40.5	36.3	34	35.9	34.1	43.8	33.1	31.9	36.1	31.9	35.4
P50238	CRIP1	Cysteine-rich protein 1	Homo sapiens	High	4	247.3	234.6	250.8	294.6	240	188.3	245.9	211.7	210.8	251.7	312.7
Q9P021	CRIPT	Cysteine-rich PDZ-binding protein	Homo sapiens	High	3	110.5	114.8	115.6	126.9	155.1	98.4	161.7	159.3	129.1	174.8	134.3
P46108	CRK	Adapter molecule crk	Homo sapiens	High	12	691.2	700	682.7	647.3	736.5	727.6	672.5	683.2	690.5	673.7	707.8
P46109	CRKL	Crk-like protein	Homo sapiens	High	17	1805.5	1766.7	1765.1	1674.1	1617.5	1600.5	1568.1	1568.8	1753.6	1604.2	1658.4
Q8IUI8	CRLF3	Cytokine receptor-like factor 3	Homo sapiens	High	7	436	408.8	448.4	441.7	461.6	523.7	458.2	436.6	431.2	445.5	438.4
Q9BZJ0	CRNKL1	Crooked neck-like protein 1	Homo sapiens	High	46	3701.2	3603.7	3568.5	3451.6	3585	3526.8	3617	3696.1	3518.1	3557.2	3369.5
Q5TZA2	CROCC	Rootletin	Homo sapiens	High	17	470.7	435.7	451.6	446.6	468	391.4	450.4	445.1	420.9	447.1	463
Q9UKG9	CROT	Peroxisomal carnitine O-octanoyltransferase	Homo sapiens	High	9	434.2	450.9	446	447.4	452.5	541	456.7	450.1	457.6	424.5	441
O75718	CRTAP	Cartilage-associated protein	Homo sapiens	High	12	782.3	717	728.9	740.7	701.7	631.7	599.5	658.8	621.3	683	710.6
Q6UUV9	CRTC1	CREB-regulated transcription coactivator 1	Homo sapiens	High	2	99	99	110.7	95	94.1	87.2	87.5	99.1	89.8	94	94.5
H0YDQ8	CRTC2	CREB-regulated transcription coactivator 2 (Fragment)	Homo sapiens	Medium	1	29.2	26.8	27	27.1	27.5	22.3	27	28.7	23.1	19.9	20.3
Q53ET0	CRTC2	CREB-regulated transcription coactivator 2	Homo sapiens	High	7	404.3	360.3	427	388.5	433.9	402.4	445	417.1	366.5	360.6	382.6
Q6UUV7	CRTC3	CREB-regulated transcription coactivator 3	Homo sapiens	High	1	12.7	11.1	9.3	16.8	11.2	11.3	11.7	11.2	7.4	11.7	11.1
Q16526	CRY1	Cryptochrome-1	Homo sapiens	High	3	71.1	72.8	64.4	81.1	78.8	68.2	81.6	89.9	91.5	86.6	69
Q49AN0	CRY2	Cryptochrome-2	Homo sapiens	High	4	170	160.4	155.1	158.2	176.8	145.5	167.7	158.2	162.7	148.8	161.6
Q08257	CRYZ	Quinone oxidoreductase	Homo sapiens	High	18	1738.7	1805.4	1755.7	1748.2	1755.3	1928.9	1773.1	1697.5	1859.2	1781.2	1736.5
O95825	CRYZL1	Quinone oxidoreductase-like protein 1	Homo sapiens	High	14	833.1	878.8	872.8	879.1	824.9	904.4	826.7	857.3	838.2	840.8	824.6
O75390	CS	Citrate synthase, mitochondrial	Homo sapiens	High	22	5218.5	5323.4	5104.7	4812.2	5231.8	5222.6	5102.8	4593.4	5324.5	5273.6	4853.5
O75534	CSDE1	Cold shock domain-containing protein E1	Homo sapiens	High	54	5909.5	6135	5989.2	6352	6507.4	6348.9	6618.4	6254.2	5996	6155.3	6647.1
O75534-3	CSDE1	Isoform 3 of Cold shock domain-containing protein E1	Homo sapiens	High	11	21.6	18.4	20.6	28.4	24.9	28.4	25.1	29.1	23	20.9	23.6
P55060	CSE1L	Exportin-2	Homo sapiens	High	50	5745.6	5847.5	5655.8	5701.7	6665.8	5375.8	6495.6	6493.5	5621.5	5761.4	5544.2
Q8N6G5	CSGALNACT2	Chondroitin sulfate N-acetylgalactosaminyltransferase 2	Homo sapiens	High	1	13	12.5	11	9.4	12.5	13.1	10.3	11.9	9.7	12.2	14.1
P41240	CSK	Tyrosine-protein kinase CSK	Homo sapiens	High	22	1856.4	1861	1878.5	1851.9	1880	1803.9	1827.4	1780	1891.5	1734	1872.4
P48729	CSNK1A1	Casein kinase I isoform alpha	Homo sapiens	High	12	1340.2	1435	1431.3	1357.3	1398.6	1617.7	1367.3	1341.9	1420	1337.1	1416.3
P48729-3	CSNK1A1	Isoform 3 of Casein kinase I isoform alpha	Homo sapiens	High	3	230	219.7	244.6	233.6	266.8	279.5	235.6	234.1	246.5	242.4	253.8
P48730	CSNK1D	Casein kinase I isoform delta	Homo sapiens	High	3	142.7	139	127.9	124.1	109.7	77.3	110.3	108.3	131.6	129.7	127.4
P49674	CSNK1E	Casein kinase I isoform epsilon	Homo sapiens	High	6	789.6	883.1	872	890.6	677.3	584.7	771	773.7	837	920.4	857.5
Q9HCP0	CSNK1G1	Casein kinase I isoform gamma-1	Homo sapiens	High	2	84.4	103.7	92.2	96.4	101.3	111.3	92.9	99.2	93.8	86.9	93.2
P78368	CSNK1G2	Casein kinase I isoform gamma-2	Homo sapiens	High	1	22.1	20.1	17.2	17.6	14.7	16.4	15.3	21.7	20.1	19.3	21.4
Q9Y6M4	CSNK1G3	Casein kinase I isoform gamma-3	Homo sapiens	High	1	251.3	274.7	267.9	272.6	241.6	241.8	255.8	285.4	277.5	280.5	267.4
Q9Y6M4-4	CSNK1G3	Isoform 4 of Casein kinase I isoform gamma-3	Homo sapiens	High	2	114.1	105.9	103.4	104.3	104.5	96.7	113.2	98.7	102.9	101.3	106.9
P68400	CSNK2A1	Casein kinase II subunit alpha	Homo sapiens	High	16	1466.3	1437.6	1459.8	1494.8	1662.8	1898.7	1454.5	1531	1382.4	1396.7	1607
P19784	CSNK2A2	Casein kinase II subunit alpha'	Homo sapiens	High	19	1589.8	1632.5	1742.9	1693.3	1942.7	1978.1	1741.8	1776	1688.4	1675.3	1740.2
P67870	CSNK2B	Casein kinase II subunit beta	Homo sapiens	High	8	1438.3	1503.7	1497.1	1525.9	1653.2	1874.3	1605.3	1657.5	1563.6	1527.6	1536.4
Q6UVK1	CSPG4	Chondroitin sulfate proteoglycan 4	Homo sapiens	High	1	19.5	14.4	14.5	14.5	13.8	20	14.8	19.7	20.1	23	16.1
Q1MSJ5	CSPP1	Centrosome and spindle pole-associated protein 1	Homo sapiens	High	8	282.9	276.7	293.1	274.4	285.5	233.7	283.6	304.4	293	294.8	303.7
P21291	CSRP1	Cysteine and glycine-rich protein 1	Homo sapiens	High	11	773.1	890.4	893.3	860.7	874.3	820.8	987.7	848.1	938.7	837.8	948.9
P01040	CSTA	Cystatin-A	Homo sapiens	High	6	200.7	275.7	228.3	177.7	266.4	247.1	213	181.6	204.4	247.8	199.9
P04080	CSTB	Cystatin-B	Homo sapiens	High	5	978.6	1151.3	947	1223.4	1327.8	803.9	1147	973	1178.5	1183.5	1417.2
Q05048	CSTF1	Cleavage stimulation factor subunit 1	Homo sapiens	High	16	1075.2	1165.3	1158.6	1127.1	1314.8	1181.7	1171.6	1188.9	1168.5	1116.3	1147.6
P33240	CSTF2	Cleavage stimulation factor subunit 2	Homo sapiens	High	8	460.9	446.2	457	438.7	528.2	380.8	514.2	520.7	440.7	462.8	416.5
Q9H0L4	CSTF2T	Cleavage stimulation factor subunit 2 tau variant	Homo sapiens	High	8	1423.2	1459.6	1395.9	1415.9	1905.3	1374.8	1675.4	1776	1383.6	1382.5	1383.4
Q12996	CSTF3	Cleavage stimulation factor subunit 3	Homo sapiens	High	31	2360.3	2299.4	2323.5	2274.2	2544.1	2277.9	2581.6	2426.8	2299.9	2423.7	2219.3
O75638	CTAG2	Cancer/testis antigen 2	Homo sapiens	High	2	13.5	15.5	15	17.1	12.3	15	12	11.7	11.6	12.6	14.4
Q13363	CTBP1	C-terminal-binding protein 1	Homo sapiens	High	15	1489.7	1508	1440.2	1426.5	1483.3	1246	1467.2	1371.9	1491.6	1461.9	1476.1
Q01459	CTBS	Di-N-acetylchitobiase	Homo sapiens	High	4	154.8	125.7	136	145.7	146.7	147.1	131.9	142.3	133.1	128.2	158.2
Q2NKJ3	CTC1	CST complex subunit CTC1	Homo sapiens	High	3	63.7	67.3	75	77.3	83.6	80	75.4	73.4	65.8	74.7	69.9
P49711	CTCF	Transcriptional repressor CTCF	Homo sapiens	High	23	3398.3	3432.1	3463.9	3398.7	2393.4	2394	3165.9	3237.6	3660.3	3359.4	3467.9
Q9Y5B0	CTDP1	RNA polymerase II subunit A C-terminal domain phosphatase	Homo sapiens	High	24	1137.8	1109.5	1148.6	1114.1	1336.2	1121	1197.2	1213.7	1093.6	1050.5	1088.9
Q9GZU7	CTDSP1	Carboxy-terminal domain RNA polymerase II polypeptide A small phosphatase 1	Homo sapiens	High	2	126.1	118.2	112.2	157	121.5	144.5	148.4	217.5	98.4	151.9	127.1
O14595	CTDSP2	Carboxy-terminal domain RNA polymerase II polypeptide A small phosphatase 2	Homo sapiens	High	1	27.6	31.5	26.2	27.9	25.7	24.9	29.7	27.3	27.7	36.7	31.3
O15194	CTDSPL	CTD small phosphatase-like protein	Homo sapiens	High	1	33.8	28.2	28.5	34.7	43.5	31.2	29	33.4	29	29.3	38.7
Q05D32	CTDSPL2	CTD small phosphatase-like protein 2	Homo sapiens	High	15	822.2	764.3	819	774.9	707.2	629.5	779.1	713.2	802.2	765.1	785.2
P32929	CTH	Cystathionine gamma-lyase	Homo sapiens	High	7	171.9	171.1	164	153.3	136.8	136.1	152.9	160.7	178.9	162.1	173.3
Q96CG8	CTHRC1	Collagen triple helix repeat-containing protein 1	Homo sapiens	High	5	278.1	279.7	272.8	282.5	191.4	229.4	219.6	249.9	299.1	261.4	295
P35221	CTNNA1	Catenin alpha-1	Homo sapiens	High	31	1899	1867.2	1802.2	1738.7	1585.8	1098.5	1758.4	1721	1715.8	1691.2	1706.5
Q9UBT7	CTNNAL1	Alpha-catulin	Homo sapiens	High	3	119.1	125.4	120.6	126.8	122.6	70.8	114.6	120.6	117.7	125.8	135.4
P35222	CTNNB1	Catenin beta-1	Homo sapiens	High	8	158.7	162.3	142.8	150.6	271.7	251.4	200.2	199.8	163	175.3	161
Q8WYA6	CTNNBL1	Beta-catenin-like protein 1	Homo sapiens	High	30	3496.5	3349.7	3366.6	3258.9	3349	3277	3353.2	3407.9	3372.4	3131	3223.3
P17812	CTPS1	CTP synthase 1	Homo sapiens	High	33	2832.9	2988.1	3119.7	3116.8	3324	3476.9	3160.7	3074.8	2946.1	2930.1	3046.9
Q6PD62	CTR9	RNA polymerase-associated protein CTR9 homolog	Homo sapiens	High	41	2528.3	2641.7	2582.8	2491.8	2651.9	2617.3	2688.9	2702.8	2708.6	2537.2	2497.3
P10619	CTSA	Lysosomal protective protein	Homo sapiens	High	9	678.9	641.8	652.6	659.5	763.6	635.9	635.8	588.1	675.3	651.1	673
P07858	CTSB	Cathepsin B	Homo sapiens	High	5	457.8	484.2	472.3	484.9	489.7	498	454.5	470	457.5	437.3	462.1
P53634	CTSC	Dipeptidyl peptidase 1	Homo sapiens	High	17	1226.6	1227.4	1176.5	1195	1333.2	1310.3	1144.9	1166	1223.3	1220	1192.4
P56202	CTSW	Cathepsin W	Homo sapiens	High	10	281.4	273.5	269.5	279.9	275.3	294.3	263.6	249.2	278.8	263.8	268.1
Q9UBR2	CTSZ	Cathepsin Z	Homo sapiens	High	3	78.8	78.2	75.7	94.6	65.5	79.1	76.3	81.8	81.4	85.4	99.4
Q14247	CTTN	Src substrate cortactin	Homo sapiens	High	8	222.7	206.3	213.1	197.6	183.1	190.4	218	205.6	198	243.6	227.6
Q8WZ74	CTTNBP2	Cortactin-binding protein 2	Homo sapiens	Medium	1	122	260.6	123.9	129.2	87.7	263.9	106.3	213.9	307.2	242.2	126.5
Q7Z7A3	CTU1	Cytoplasmic tRNA 2-thiolation protein 1	Homo sapiens	High	4	212.8	199.7	192.4	197.8	230.8	209.6	190.1	193.6	215.3	193.5	211.6
Q2VPK5	CTU2	Cytoplasmic tRNA 2-thiolation protein 2	Homo sapiens	High	11	470.4	452.9	462.3	452.4	530.6	580.1	434.6	449.7	451.7	474.6	442.4
Q9H467	CUEDC2	CUE domain-containing protein 2	Homo sapiens	High	4	224.5	211.1	207.3	231.1	192.4	153.6	175.9	191.4	187.6	193.8	230.8
Q13616	CUL1	Cullin-1	Homo sapiens	High	41	2655.7	2669.2	2590	2662.3	2799	2438.3	2728.7	2819.7	2549.1	2519	2556.5
Q13617	CUL2	Cullin-2	Homo sapiens	High	31	2381.2	2521	2448.4	2595.2	2947.6	2774.4	2757.7	2819	2519.2	2665.4	2554
Q13618	CUL3	Cullin-3	Homo sapiens	High	43	3639.6	3783.2	3582.9	3759.2	3794	3752.6	3903.2	4155.9	3638.2	3797.7	3648.5
Q13619	CUL4A	Cullin-4A	Homo sapiens	High	24	1759.7	1690.1	1768.7	1730.9	1925.2	1792.1	1773.1	1817.3	1681.6	1637.6	1709.9
Q13620	CUL4B	Cullin-4B	Homo sapiens	High	31	2729.8	2682.3	2679.2	2869.7	2710.4	2591.1	2762.9	2904.8	2674.2	2670.4	2670.8
Q93034	CUL5	Cullin-5	Homo sapiens	High	34	2754.2	2631.8	2714	2698.4	2823	2753.9	2748.4	2766.4	2606.5	2553.9	2639.3
Q8IWT3	CUL9	Cullin-9	Homo sapiens	High	11	267.1	259.2	263.3	284.8	266.7	230.8	267.4	255.6	234.6	254.9	265.3
O60888	CUTA	Protein CutA	Homo sapiens	High	3	154.3	147.2	146.2	162.4	166.2	139.5	142.3	145.6	137.9	161.2	155.8
Q9NTM9	CUTC	Copper homeostasis protein cutC homolog	Homo sapiens	High	14	667.7	693.2	725.5	703.8	681.9	737	641	649.2	675.4	661.6	663
P39880	CUX1	Homeobox protein cut-like 1	Homo sapiens	High	14	2092.1	1966.3	1928.9	1838.5	2264.1	1832	2194.6	2212.1	1834.5	1943.3	1757.1
Q13948	CUX1	Protein CASP	Homo sapiens	High	5	270	246.8	257.6	282	326.6	276.9	307.2	323.1	267.2	293.2	280.4
Q9P013	CWC15	Spliceosome-associated protein CWC15 homolog	Homo sapiens	High	11	866	909.7	891.2	858.8	808.7	811.9	856.8	845.8	888.3	886.4	875.2
Q9HCG8	CWC22	Pre-mRNA-splicing factor CWC22 homolog	Homo sapiens	High	26	2010.5	2010.7	2033.2	2070.9	2136.4	2307	2112.5	2173.7	2087.3	2117.7	2097.2
Q9NXE8	CWC25	Pre-mRNA-splicing factor CWC25 homolog	Homo sapiens	High	12	386	384.7	397	371.1	343.9	355.3	355.8	391.5	383.6	420.7	399.6
Q6UX04	CWC27	Peptidyl-prolyl cis-trans isomerase CWC27 homolog	Homo sapiens	High	25	1033.2	1022.5	1027.5	1037.8	997.9	1078.6	1085.9	1005	1075.8	1035.4	984.3
Q69YN2	CWF19L1	CWF19-like protein 1	Homo sapiens	High	19	1745.4	1762.7	1728	1737	1777.6	1961.5	1813.3	1782.6	1873.8	1761.3	1767.6
Q2TBE0	CWF19L2	CWF19-like protein 2	Homo sapiens	High	22	966.8	963.1	977.4	936.1	912.6	990.2	949.6	977	1009.1	946	945.2
P78310	CXADR	Coxsackievirus and adenovirus receptor	Homo sapiens	High	6	287	292.5	298.5	294.7	309.8	396.3	313.7	320.2	291.5	285.2	282.5
P61073	CXCR4	C-X-C chemokine receptor type 4	Homo sapiens	High	3	231.6	232.3	211.7	280.4	224.1	227.6	184.4	235.4	216.4	242.9	248
A2AJT9	CXorf23	Uncharacterized protein CXorf23	Homo sapiens	High	5	155.8	158.6	157.3	172.9	107.8	112.6	154.1	145.9	134.6	168.8	165.8
Q8TB03	CXorf38	Uncharacterized protein CXorf38	Homo sapiens	High	14	777.8	795.6	735	716.3	736.2	572.8	709.3	754.6	749.3	773	792.2
Q9H5V9	CXorf56	UPF0428 protein CXorf56	Homo sapiens	High	10	499	514.8	504.4	504.5	389	400.5	455.1	474.2	553.4	539.7	509.9
Q6NSI4	CXorf57	Uncharacterized protein CXorf57	Homo sapiens	High	3	37.1	31.4	34.8	33.1	28.5	27.5	25.3	28.4	29.7	30.2	32.4
Q9P0U4	CXXC1	CXXC-type zinc finger protein 1	Homo sapiens	High	14	517.4	495.1	518.4	506.6	535	503.4	519.4	488.7	496.8	458.3	510.9
J9JIF5	CXXC4	CXXC-type zinc finger protein 4	Homo sapiens	High	2	29.6	34.7	31.6	35.1	58.7	46	54.5	51.3	39.7	33	31.7
Q8NBI2	CYB561A3	Cytochrome b ascorbate-dependent protein 3	Homo sapiens	Medium	1	23.5	23.6	24.8	48.8	33.2	51.1	27.1	44.8	29.1	49.9	30.5
O14569	CYB561D2	Cytochrome b561 domain-containing protein 2	Homo sapiens	High	1	28.2	25.7	32.7	34.5	27.8	38.4	36.7	36.5	33	28.4	30.6
O43169	CYB5B	Cytochrome b5 type B	Homo sapiens	High	7	475.1	427.8	424.2	460	553.4	448.6	395.4	422.8	409.7	486.1	459.3
Q9UHQ9	CYB5R1	NADH-cytochrome b5 reductase 1	Homo sapiens	High	11	656.7	592.5	609.4	657.2	729	745.2	678.9	623.9	621.4	637.4	627
P00387	CYB5R3	NADH-cytochrome b5 reductase 3	Homo sapiens	High	16	1127.3	1058.3	1152	1253.2	1288.6	1364.3	1095.1	1121.2	1128.6	1124.5	1230.5
Q7L1T6	CYB5R4	Cytochrome b5 reductase 4	Homo sapiens	High	7	208.4	212.1	197	211.3	214	211.5	216.8	224.9	218	197.4	222.6
P13498	CYBA	Cytochrome b-245 light chain	Homo sapiens	High	6	284.1	297.6	278.6	322.3	230.7	213.4	262.4	299.4	292	340.2	299.9
Q53TN4	CYBRD1	Cytochrome b reductase 1	Homo sapiens	High	4	128.2	121.4	139.4	164.4	235.3	227.8	186.8	184.7	142.5	218.3	142.6
P08574	CYC1	Cytochrome c1, heme protein, mitochondrial	Homo sapiens	High	12	1594.2	1530.5	1598.6	1446.9	1702.4	1575.1	1404.4	1381.9	1438	1600	1399
Q7L576	CYFIP1	Cytoplasmic FMR1-interacting protein 1	Homo sapiens	High	3	65.9	73	80.5	39.1	121	49.5	88.8	69	77.8	90.1	65.1
Q96F07	CYFIP2	Cytoplasmic FMR1-interacting protein 2	Homo sapiens	High	27	4269.3	4233.3	4088.8	4606	4407.8	4244.7	4205	4558.1	4093.7	4683.5	4669.8
Q6ZMK1	CYHR1	Cysteine and histidine-rich protein 1	Homo sapiens	High	2	31.4	42.3	42.4	49.6	47.4	32.6	48.6	50.5	36.1	43.8	47.1
Q9NQC7	CYLD	Ubiquitin carboxyl-terminal hydrolase CYLD	Homo sapiens	Medium	1	13.4	11.4	12.2	9	11.1	12.6	11.8	9.3	13.7	10.8	15.5
Q6UW02	CYP20A1	Cytochrome P450 20A1	Homo sapiens	High	13	776.7	727.4	721.5	728.9	772.6	796.2	713.9	694.6	726.3	733.5	732.2
Q7Z449	CYP2U1	Cytochrome P450 2U1	Homo sapiens	High	2	25.2	20.4	15.5	23.8	22.9	23.8	19.5	23.4	19.4	25.7	20
Q6ZWL3	CYP4V2	Cytochrome P450 4V2	Homo sapiens	High	4	56.4	54	64.5	61.7	68.7	70.6	59.4	70.2	62.6	55.2	67.5
Q16850	CYP51A1	Lanosterol 14-alpha demethylase	Homo sapiens	High	21	1685	1744.3	1718.7	1877.5	1850.8	1313.2	1860.7	1883	1661.8	1600.8	1912.8
Q9H1C7	CYSTM1	Cysteine-rich and transmembrane domain-containing protein 1	Homo sapiens	High	1	38.1	32.9	33.5	45.9	46	41.8	38.2	41.9	39.1	48.8	45.4
Q15438	CYTH1	Cytohesin-1	Homo sapiens	High	6	185.2	193.9	195.9	204.7	163.6	132.7	178.5	181	196.4	189.5	197.1
O43739	CYTH3	Cytohesin-3	Homo sapiens	High	1	56.7	54.9	51.5	57.9	53.3	51.9	52.5	64.6	55.9	60.9	59.6
Q8N465	D2HGDH	D-2-hydroxyglutarate dehydrogenase, mitochondrial	Homo sapiens	High	7	319.4	302.7	291.7	290.6	295.8	282.8	282.4	295.8	286.7	319.7	289.9
Q9Y4D1	DAAM1	Disheveled-associated activator of morphogenesis 1	Homo sapiens	High	5	147.9	139.9	136	136.7	133.9	119.3	124.3	140	129.9	141.7	140.1
P98082	DAB2	Disabled homolog 2	Homo sapiens	High	7	313.2	313.2	330.7	335.4	303.4	306.4	280.2	303.7	306.7	281.2	305.9
Q9UI36	DACH1	Dachshund homolog 1	Homo sapiens	High	5	182.5	165	173	161.5	163.2	141.9	161.9	142.1	146.8	146.5	170.9
P61803	DAD1	Dolichyl-diphosphooligosaccharide--protein glycosyltransferase subunit DAD1	Homo sapiens	High	4	236.6	181.6	154.5	231.2	212.4	274.3	183.7	176.5	192.3	266.6	186.3
Q14118	DAG1	Dystroglycan	Homo sapiens	High	6	328.4	325.9	304.4	288.1	271	309.7	267.1	285.1	317.2	294.3	286.3
Q8NCG7	DAGLB	Sn1-specific diacylglycerol lipase beta	Homo sapiens	High	11	475.8	440.8	460.7	494.7	537.4	487.8	485	453.2	468	457.8	476.1
Q5D0E6	DALRD3	DALR anticodon-binding domain-containing protein 3	Homo sapiens	High	3	131	123.6	125.7	123.1	189.8	124.2	156.5	145.5	139.5	127.9	126.6
P51397	DAP	Death-associated protein 1	Homo sapiens	High	4	796.7	666.8	698.6	749.4	609.6	637.8	684.3	629.6	607.8	811.6	695.6
P51398	DAP3	28S ribosomal protein S29, mitochondrial	Homo sapiens	High	20	1472.5	1451	1476.9	1486.9	1542	1440.9	1431.2	1301.4	1414.7	1438.6	1488.8
P53355	DAPK1	Death-associated protein kinase 1	Homo sapiens	High	10	740	729.5	744.6	746.7	741.1	685.8	731.3	755.6	739.3	748.9	774.2
O43293	DAPK3	Death-associated protein kinase 3	Homo sapiens	High	6	275.9	269.8	277.8	285.5	251	256.1	265.2	290	284.5	267.2	285.3
P14868	DARS	Aspartate--tRNA ligase, cytoplasmic	Homo sapiens	High	43	5321.8	5306.7	5457.1	5600.5	5835.8	5371.9	5654.5	5346.7	5397.1	5045	5378.5
Q6PI48	DARS2	Aspartate--tRNA ligase, mitochondrial	Homo sapiens	High	24	1686.7	1872.2	1709.4	1823.3	2068.1	2210.3	1862.1	2012	1944.5	1884.9	1763.2
Q9UER7	DAXX	Death domain-associated protein 6	Homo sapiens	High	15	808.1	788.6	804.3	807.6	804.5	766.3	842.1	873.9	780.3	824.6	811.9
Q96EP5	DAZAP1	DAZ-associated protein 1	Homo sapiens	High	10	758.2	903	837.1	859.8	960	814.5	947.3	928.5	914.7	843.1	869.1
Q9UBU7	DBF4	Protein DBF4 homolog A	Homo sapiens	High	5	149.7	145.4	145.1	152.4	179.1	178.2	145.5	165.3	128.1	142.3	143.5
Q8NFT6	DBF4B	Protein DBF4 homolog B	Homo sapiens	High	1	57.2	60.4	58.7	66.2	66.7	54.5	59.2	58.9	65.1	52.8	64.4
P07108	DBI	Acyl-CoA-binding protein	Homo sapiens	High	4	521.4	584.3	536.2	512.2	714.1	403.5	479.3	466.3	544.4	517.5	553.2
Q16643	DBN1	Drebrin	Homo sapiens	High	35	1928.8	2018	1901.5	1827.8	1682.8	1791.7	1823.7	1998.9	1860.1	1907.4	1944
D6R9W4	DBN1	Drebrin (Fragment)	Homo sapiens	High	7	679.8	797	745.6	724	722.2	756.9	922.4	890.8	853.5	814.6	827.9
Q9UJU6	DBNL	Drebrin-like protein	Homo sapiens	High	21	1670.6	1682.2	1623.9	1576.4	1524.8	1471.7	1684	1570.3	1703.8	1613.4	1688.4
Q9UJU6-3	DBNL	Isoform 3 of Drebrin-like protein	Homo sapiens	High	8	7.7	11.4	11.7	9.7	13	11.7	16	9.7	10.2	12.3	10.6
Q9UK59	DBR1	Lariat debranching enzyme	Homo sapiens	High	17	1698.1	1669.7	1690.7	1731	1681.5	1684	1546.7	1730.4	1653.3	1606.1	1639.6
P11182	DBT	Lipoamide acyltransferase component of branched-chain alpha-keto acid dehydrogenase complex, mitochondrial	Homo sapiens	High	17	1482.6	1441.1	1439.7	1483.5	1649.1	1814.6	1616.7	1588.9	1508.6	1587.2	1518.5
Q5QP82	DCAF10	DDB1- and CUL4-associated factor 10	Homo sapiens	High	5	203.9	202.3	198	214.8	185.1	173.6	187.9	184.1	180.2	207.1	201.2
Q8TEB1	DCAF11	DDB1- and CUL4-associated factor 11	Homo sapiens	High	11	515.9	508.7	544.1	550.2	552.1	538.6	528.6	530.2	513.5	452.2	541.8
Q5T6F0	DCAF12	DDB1- and CUL4-associated factor 12	Homo sapiens	High	5	300.6	297.8	283.1	304	232.6	232.8	283.1	307.7	296.4	334.3	302.4
Q9NV06	DCAF13	DDB1- and CUL4-associated factor 13	Homo sapiens	High	18	1088.9	1146.6	1144.1	1082.7	908.7	604.6	1077.7	1117.5	1123.4	1068.6	1153.8
Q66K64	DCAF15	DDB1- and CUL4-associated factor 15	Homo sapiens	High	13	827	848.3	881.5	828.9	927.2	856.1	834.6	838.5	871.8	888.4	861.6
Q9NXF7	DCAF16	DDB1- and CUL4-associated factor 16	Homo sapiens	High	5	322.7	302.5	319.1	314.2	255.6	283.8	264.2	257.3	273.9	281.6	309.2
Q8WV16	DCAF4	DDB1- and CUL4-associated factor 4	Homo sapiens	High	3	73.3	81	78.8	76	97.8	66	95.3	96.2	80.9	70.2	82.1
Q96JK2	DCAF5	DDB1- and CUL4-associated factor 5	Homo sapiens	High	13	526.7	529.6	542.5	558.4	517.4	491.6	513.4	532.6	539.3	522.2	523.5
Q58WW2	DCAF6	DDB1- and CUL4-associated factor 6	Homo sapiens	High	6	67.1	62.9	61.5	66.2	69	64.1	64.5	67.8	65.6	66.9	69.4
P61962	DCAF7	DDB1- and CUL4-associated factor 7	Homo sapiens	High	12	1055.8	1018.7	1065.7	1052.7	950.4	914.8	1016.2	1000.4	1052.2	1007.6	1086
Q5TAQ9	DCAF8	DDB1- and CUL4-associated factor 8	Homo sapiens	High	11	483.1	457.4	478.1	478.9	441.4	388.3	461.8	472.2	465.2	442.3	470.8
Q8WVC6	DCAKD	Dephospho-CoA kinase domain-containing protein	Homo sapiens	High	8	265.6	235.8	245.9	252.5	255.5	281.4	249.8	233.2	246	234.3	250.5
P81605	DCD	Dermcidin	Homo sapiens	High	4	538.7	226.5	239.9	279.8	359.8	251.4	265.5	163.3	180.1	803.4	311.2
Q6ZRR9	DCDC5	Doublecortin domain-containing protein 5	Homo sapiens	Medium	2	163.1	143	147.5	146.4	136.6	127.4	134.3	125.4	150.2	146.5	148.3
P27707	DCK	Deoxycytidine kinase	Homo sapiens	High	14	823.8	833.5	836.4	780.6	817.5	652.9	810	697.1	868.5	776.6	847.1
O15075	DCLK1	Serine/threonine-protein kinase DCLK1	Homo sapiens	High	1	51.2	75.1	40.8	23.4	18.3	59.8	23.7	30.5	30.7	62.4	57
Q6PJP8	DCLRE1A	DNA cross-link repair 1A protein	Homo sapiens	High	2	101.2	109.5	101.3	107	218.4	394.8	122	95.4	88.8	114.2	98.9
Q9H816	DCLRE1B	5' exonuclease Apollo	Homo sapiens	High	4	101.5	94	92.3	104.9	99	78.8	85.5	91.5	91.7	93	92
Q96SD1	DCLRE1C	Protein artemis	Homo sapiens	Medium	1	32.4	29.3	25.3	27.3	27.1	21.8	31.7	34.6	26.6	27.9	32.8
Q9NPI6	DCP1A	mRNA-decapping enzyme 1A	Homo sapiens	High	16	1410.3	1413.5	1375.7	1352.7	1466.3	1076.5	1520.4	1552.4	1402.1	1329.3	1300.3
Q8IZD4	DCP1B	mRNA-decapping enzyme 1B	Homo sapiens	High	19	1028.9	1032.7	1020.9	974.6	987.9	737.9	976	956.8	1002.8	963.3	952.6
Q8IU60	DCP2	m7GpppN-mRNA hydrolase	Homo sapiens	High	9	405.2	385.9	404.5	393.9	372	322.5	363	393.1	386.2	407.4	412.8
Q96C86	DCPS	m7GpppX diphosphatase	Homo sapiens	High	16	1262.2	1230.3	1250.9	1304.5	1278.3	1322	1181.3	1202.7	1291.9	1213.9	1268.6
P32321	DCTD	Deoxycytidylate deaminase	Homo sapiens	High	9	328.8	333.8	327.6	332	364	331.5	338.7	344.1	371.1	326.9	333.3
Q14203	DCTN1	Dynactin subunit 1	Homo sapiens	High	48	3932.5	4005.3	3854.8	3832.7	4244	3360.5	4172.5	4093.3	3891.7	3838.9	3711
E7EX90	DCTN1	Dynactin subunit 1	Homo sapiens	Medium	9	17.9	16.5	19.1	14.2	19.8	13.3	18.5	15.9	18.4	15.3	14.1
Q13561	DCTN2	Dynactin subunit 2	Homo sapiens	High	24	2199.4	2268.9	2096.9	2042.5	1949	1604.2	1810	1879.8	2175.4	1988.9	1982.3
O75935	DCTN3	Dynactin subunit 3	Homo sapiens	High	6	500.8	579.8	472.6	436.9	478.7	345.6	412.5	449.1	508.9	496.2	465.8
Q9UJW0	DCTN4	Dynactin subunit 4	Homo sapiens	High	16	950.3	1065.6	1015.1	1010.9	1030	924.7	1077.3	1127	1126.7	1052.1	1042.2
Q9BTE1	DCTN5	Dynactin subunit 5	Homo sapiens	High	5	464.6	476.1	453.5	477.7	503.3	476.5	471.3	485.4	460.4	482.1	470.4
O00399	DCTN6	Dynactin subunit 6	Homo sapiens	High	6	375.5	319.7	406.6	382.1	430.2	322.9	312	322	315.1	317.3	381
Q9H773	DCTPP1	dCTP pyrophosphatase 1	Homo sapiens	High	11	962.1	858.1	970.2	908.8	935.8	685.6	703.9	682.8	769	767.6	875
Q96GG9	DCUN1D1	DCN1-like protein 1	Homo sapiens	High	10	1089.9	1164.3	1106.3	1127.7	1093.6	1008.9	1138.8	1093.9	1183.7	1124	1140.5
Q8IWE4	DCUN1D3	DCN1-like protein 3	Homo sapiens	High	3	74.6	74.4	74.4	70.8	79.4	73.6	81	89.2	69.6	65	73.3
Q92564	DCUN1D4	DCN1-like protein 4	Homo sapiens	High	5	116.6	121.8	123.5	138.2	123.1	141.1	122.5	128.6	118.3	127.3	133
Q9BTE7	DCUN1D5	DCN1-like protein 5	Homo sapiens	High	10	989.9	982.8	966.5	992.6	1027.4	1097.9	971.7	967.1	976.9	928.9	991.6
Q7Z4W1	DCXR	L-xylulose reductase	Homo sapiens	High	12	1253.1	1226.7	1233.7	1323.2	1665.3	1414.8	1387.8	1325.6	1412.1	1211.2	1353.8
Q9BW61	DDA1	DET1- and DDB1-associated protein 1	Homo sapiens	High	8	481.5	478.6	496.6	416.1	424.7	306.4	396	401.4	437.6	442.2	473.7
O94760	DDAH1	N(G),N(G)-dimethylarginine dimethylaminohydrolase 1	Homo sapiens	High	1	25.2	28.4	22.2	30.9	30.3	37.8	35.7	33.8	33.5	41.2	45.4
O95865	DDAH2	N(G),N(G)-dimethylarginine dimethylaminohydrolase 2	Homo sapiens	High	8	528	546.1	491.9	519.6	492	381.7	480.4	488.5	552.1	445.5	514.4
Q16531	DDB1	DNA damage-binding protein 1	Homo sapiens	High	53	6150.8	5998.8	6161	6450.6	6188.8	6145.9	5829.2	5951.1	6044.2	6174.4	6367.4
Q92466	DDB2	DNA damage-binding protein 2	Homo sapiens	High	12	565.8	550.1	553.4	604.1	519.3	509.2	545.4	541.1	555.4	539.8	551.8
Q8NEL9	DDHD1	Phospholipase DDHD1	Homo sapiens	High	13	715.8	718.8	688.4	733.6	863.3	802.2	775.5	795.9	714.6	740.3	732.8
O94830	DDHD2	Phospholipase DDHD2	Homo sapiens	High	12	357.6	338.1	354	363.7	334.4	272.3	340	361	360.6	359.7	387.6
Q5TDH0	DDI2	Protein DDI1 homolog 2	Homo sapiens	High	16	1225.8	1196.6	1235.2	1185	1261.9	1140.5	1198.8	1147.4	1228	1094.5	1173.1
P39656	DDOST	Dolichyl-diphosphooligosaccharide--protein glycosyltransferase 48 kDa subunit	Homo sapiens	High	14	1226.8	1121.5	1207.9	1359.2	1290.4	1537.6	1210	1247.4	1187.6	1237.7	1273.1
Q96HY6	DDRGK1	DDRGK domain-containing protein 1	Homo sapiens	High	11	760.8	674.9	687.4	710.6	770.4	705.3	716.9	676.1	669.8	640.2	703.9
P30046	DDT	D-dopachrome decarboxylase	Homo sapiens	High	7	848.4	831.8	845	895.1	927.7	809.1	871.5	797.4	968.5	846	830
Q92499	DDX1	ATP-dependent RNA helicase DDX1	Homo sapiens	High	45	4627.5	4546.3	4623	4691.4	4626.4	5027.3	4600.7	4618.1	4748.9	4361.8	4647.2
Q13206	DDX10	Probable ATP-dependent RNA helicase DDX10	Homo sapiens	High	41	2372.1	2290.4	2383.4	2302.5	1441.6	956.7	1972.9	2184	2472.4	2409	2357.5
Q96FC9	DDX11	ATP-dependent DNA helicase DDX11	Homo sapiens	High	2	140.9	150	138.2	165	137.1	129.5	185.7	188	163.7	135.8	162.9
A8MPP1	DDX11L8	Putative ATP-dependent RNA helicase DDX11-like protein 8	Homo sapiens	High	4	484.8	483.5	491.2	500.6	556.1	512.1	517.6	480.7	488.1	477.5	560.3
Q92841	DDX17	Probable ATP-dependent RNA helicase DDX17	Homo sapiens	High	31	5206.4	5277.7	5274.3	5114.8	5581.4	6074.6	5504.7	5458.9	5272.6	5360.9	5180.5
Q9NVP1	DDX18	ATP-dependent RNA helicase DDX18	Homo sapiens	High	34	5989.2	5714.4	5989.5	5900.8	5013.4	5488.1	5667.4	5604.9	6027.7	5724	5947.8
Q9NUU7	DDX19A	ATP-dependent RNA helicase DDX19A	Homo sapiens	High	7	3371.7	3502.4	3335.5	3300.5	3265.2	3628.2	3240.8	3332.2	3387.8	3198.7	3223.5
Q9UMR2	DDX19B	ATP-dependent RNA helicase DDX19B	Homo sapiens	High	3	220.5	240.9	210.1	209.7	232.3	200.2	260.7	253.1	230.4	199.9	201.7
Q9UHI6	DDX20	Probable ATP-dependent RNA helicase DDX20	Homo sapiens	High	30	1848.8	1964.6	1856.2	1891.2	2074	2061.8	1945.4	2014.7	1981.6	1911.1	1841.8
Q9NR30	DDX21	Nucleolar RNA helicase 2	Homo sapiens	High	62	8430.8	8298.9	8708.2	8155.4	8523.7	9582.9	8650.6	8540.1	8408.8	8675.5	8471.5
Q9BUQ8	DDX23	Probable ATP-dependent RNA helicase DDX23	Homo sapiens	High	41	4196.3	4065.6	4313.2	4242.3	3784.3	4219.7	3934.2	3794.9	4122.5	4016.1	4227.8
Q9GZR7	DDX24	ATP-dependent RNA helicase DDX24	Homo sapiens	High	40	3587.9	3687.2	3654.7	3575.6	2641.9	1822.9	3529.6	3395.2	3776.8	3523.5	3661.1
Q96GQ7	DDX27	Probable ATP-dependent RNA helicase DDX27	Homo sapiens	High	38	4159	4254.8	4320.5	4063.4	3327.6	2755.3	4002.4	4113.7	4355.8	4124	4171.4
Q9NUL7	DDX28	Probable ATP-dependent RNA helicase DDX28	Homo sapiens	High	20	1257.8	1270.8	1256.7	1183.4	1412.7	1481	1300.7	1267.5	1248.6	1235.8	1177
Q9H8H2	DDX31	Probable ATP-dependent RNA helicase DDX31	Homo sapiens	High	23	1294.4	1313.2	1307.9	1340.9	1183.1	1112.1	1294.4	1359.2	1332.8	1415.5	1326.6
O00148	DDX39A	ATP-dependent RNA helicase DDX39A	Homo sapiens	High	9	3867.4	3882.5	3971.4	4068.3	4089.4	4344.5	3948	3841	3953.7	3742	4012.6
Q13838	DDX39B	Spliceosome RNA helicase DDX39B	Homo sapiens	High	8	1764.2	1836.1	1801.1	1957	1770	2030.2	1894.2	1878.2	1904.4	1967.8	1924.4
O00571	DDX3X	ATP-dependent RNA helicase DDX3X	Homo sapiens	High	50	5870	5961.8	5781.8	5786.4	5680.4	5982.8	5833	5760.4	5932.4	6013	5903.5
Q9UJV9	DDX41	Probable ATP-dependent RNA helicase DDX41	Homo sapiens	High	30	2523.9	2558.7	2576.1	2486.2	3031.2	2505.8	2676.1	2817.8	2642.5	2722.1	2519.7
Q86XP3	DDX42	ATP-dependent RNA helicase DDX42	Homo sapiens	High	38	2857.4	2903.2	2850	2806.9	3056	2983.9	3048.3	3215.9	3008.5	3139	2971.9
A0A0C4DG89	DDX46	Probable ATP-dependent RNA helicase DDX46	Homo sapiens	High	11	1157.7	1203.2	1117	1108.9	1066.8	1128.3	992.5	1099.9	1232	1163.4	1130.7
Q7L014	DDX46	Probable ATP-dependent RNA helicase DDX46	Homo sapiens	High	67	5330.2	5360.3	5592.4	5678	4974.1	5611.6	5199.5	5252.3	5524.7	5181.2	5525.5
Q9H0S4	DDX47	Probable ATP-dependent RNA helicase DDX47	Homo sapiens	High	21	3696.8	3530.9	3621.8	3757.1	3264.6	4032.6	3219.8	3462.5	3634.1	3565	3602.1
Q9Y6V7	DDX49	Probable ATP-dependent RNA helicase DDX49	Homo sapiens	High	20	2024.1	1943.8	1998.7	2031.4	1430.3	994.6	1718.3	1825.6	1989.2	2074.7	1971.4
P17844	DDX5	Probable ATP-dependent RNA helicase DDX5	Homo sapiens	High	39	7232.3	7231.8	7383.4	7387.1	7269.9	9056	7477.3	7655.2	7491.1	7784.8	7321.7
Q9BQ39	DDX50	ATP-dependent RNA helicase DDX50	Homo sapiens	High	31	2468.6	2331	2525.6	2415.3	2410.4	2250.2	2421.6	2386.5	2397.1	2215.5	2494.2
Q8N8A6	DDX51	ATP-dependent RNA helicase DDX51	Homo sapiens	High	26	1608	1644.8	1636.1	1591.3	1831.8	1577.3	1696.6	1736.7	1608.4	1578	1584.1
Q9Y2R4	DDX52	Probable ATP-dependent RNA helicase DDX52	Homo sapiens	High	20	1583	1611.7	1540.6	1387.2	958.6	689.5	1326.1	1331.2	1632.1	1441.2	1472
Q8TDD1	DDX54	ATP-dependent RNA helicase DDX54	Homo sapiens	High	41	1852.8	1821.4	1846.8	1842.6	1764.2	1504.6	1849.7	1874.7	1857.6	1963	1847.6
Q8NHQ9	DDX55	ATP-dependent RNA helicase DDX55	Homo sapiens	High	18	934.7	903.1	951.5	904.1	924.6	928.7	925.7	855.3	943	968.9	908.7
Q9NY93	DDX56	Probable ATP-dependent RNA helicase DDX56	Homo sapiens	High	20	1223.4	1228.4	1236.5	1203.4	1075.4	795.5	1150.6	1281.9	1233.6	1224.3	1165.3
O95786	DDX58	Probable ATP-dependent RNA helicase DDX58	Homo sapiens	High	21	1062.1	1046	1003.8	1105.4	1005.7	1032.2	1028	1057.7	1032.6	1033.7	1138.6
Q5T1V6	DDX59	Probable ATP-dependent RNA helicase DDX59	Homo sapiens	High	8	341.6	325.4	333.2	322.5	327.5	320.8	323.7	317.4	306.6	301.8	341.3
P26196	DDX6	Probable ATP-dependent RNA helicase DDX6	Homo sapiens	High	22	2701.5	2667.2	2714.8	2828.3	3046.9	2903.7	3014.7	2887.3	2746.7	2744.7	2792.9
Q8IY21	DDX60	Probable ATP-dependent RNA helicase DDX60	Homo sapiens	High	35	1826.5	1795	1774.1	1946.4	1685.3	1879.5	1707.3	1884.9	1773.1	1836	1920.6
Q5H9U9	DDX60L	Probable ATP-dependent RNA helicase DDX60-like	Homo sapiens	High	1	8.8	11	10.5	9.7	23.2	13.3	16.3	12.6	10.8	14.6	9.4
O75398	DEAF1	Deformed epidermal autoregulatory factor 1 homolog	Homo sapiens	High	6	247.8	226.5	245.8	243.1	255.5	220.1	242.1	239.2	229.2	235.3	246.5
Q16698	DECR1	2,4-dienoyl-CoA reductase, mitochondrial	Homo sapiens	High	21	2840	2630.8	2700.1	2799.1	2746.4	2641.5	2580.1	2453.7	2742.2	2678.2	2774.9
Q9NUI1	DECR2	Peroxisomal 2,4-dienoyl-CoA reductase	Homo sapiens	High	8	250.7	261.1	253.5	253.4	275.9	297.3	268.2	285.3	267.8	264.3	263.7
O75618	DEDD	Death effector domain-containing protein	Homo sapiens	High	1	35.4	33.5	35.4	31.8	32.4	29.6	31.7	30.8	38.8	36.6	38.6
Q9H4E7	DEF6	Differentially expressed in FDCP 6 homolog	Homo sapiens	High	33	2754.3	2643.7	2733.1	2658.6	2773.8	2657.6	2829.7	2725.5	2588	2584.9	2591.7
O15121	DEGS1	Sphingolipid delta(4)-desaturase DES1	Homo sapiens	High	4	156.8	153.9	172.4	159.8	153.5	130.6	149.8	154.5	169.2	174	169.7
P35659	DEK	Protein DEK	Homo sapiens	High	24	2178	2196.9	2205.8	2122.1	1865.4	2198.1	2112	2132.1	2377.1	2255.3	2181.8
Q8TEH3	DENND1A	DENN domain-containing protein 1A	Homo sapiens	High	7	92.1	94.7	84.5	94.4	114	109.1	98.3	108.7	96.9	90.1	88.5
Q8IV53	DENND1C	DENN domain-containing protein 1C	Homo sapiens	High	10	720.5	717	693.4	688.3	691.8	637.5	732.6	753.1	720.6	725.7	700.7
A2RUS2	DENND3	DENN domain-containing protein 3	Homo sapiens	High	3	120.7	106.7	115.3	106	84.8	77	87.5	99.1	105.2	95.3	93.8
Q7Z401	DENND4A	C-myc promoter-binding protein	Homo sapiens	High	4	59.6	52.7	57.6	57.8	37.3	42.4	51.3	51.7	51.4	55.8	51.9
Q5VZ89	DENND4C	DENN domain-containing protein 4C	Homo sapiens	High	15	564.7	614.6	573.7	581.6	568.5	507.6	598.5	631.4	588.6	562	598.8
R4GN35	DENND4C	DENN domain-containing protein 4C	Homo sapiens	High	7	129.1	125.5	135.1	128.7	137	122	113.9	109.4	114.4	119.2	138.1
Q8IWF6	DENND6A	Protein DENND6A	Homo sapiens	High	8	354.1	378.2	356.7	356.3	413.4	366	386.1	378.8	365.4	408.7	360
O43583	DENR	Density-regulated protein	Homo sapiens	High	11	989.8	974.9	993.8	1173.3	860.9	1339.4	1087.3	1283.3	953.1	1245.6	1104.4
Q5TB30	DEPDC1	DEP domain-containing protein 1A	Homo sapiens	High	3	60.9	56.8	58.4	73.8	49.7	60.1	57.6	59.8	47.9	75.8	51.2
Q8WUY9	DEPDC1B	DEP domain-containing protein 1B	Homo sapiens	High	9	389.8	364.8	386.1	419.4	354.3	318.5	384.8	420.5	363.4	407.6	410.5
O75140	DEPDC5	DEP domain-containing protein 5	Homo sapiens	High	9	158.2	168.4	153.1	197.6	151.3	182.5	161.6	193.2	155.2	181.9	171.7
Q9Y315	DERA	Deoxyribose-phosphate aldolase	Homo sapiens	High	18	737.1	717.1	703.8	690.6	712	621.2	672.1	592.1	687.9	691.3	715.7
Q9BUN8	DERL1	Derlin-1	Homo sapiens	High	4	327.9	297.4	310.2	326	370.7	369.5	296	314.7	305.6	351	316.2
Q9GZP9	DERL2	Derlin-2	Homo sapiens	High	1	34.7	28.3	36.5	39.3	45.1	50.5	37.3	46	34	35.4	36.3
P17661	DES	Desmin	Homo sapiens	High	12	551.7	543.4	526.2	477.9	445.4	555.3	578.5	513	580	606	610.5
Q6ICB0	DESI1	Desumoylating isopeptidase 1	Homo sapiens	High	2	118.2	107.9	101.8	135.4	177	119.9	120	101.3	122.9	122.6	137.7
Q9BSY9	DESI2	Desumoylating isopeptidase 2	Homo sapiens	High	2	108.4	119.3	108.3	148.4	122.8	202.6	110.7	149.6	128.3	148	159.2
O00273-2	DFFA	Isoform DFF35 of DNA fragmentation factor subunit alpha	Homo sapiens	High	2	40	50.6	53.2	46.1	42.1	30.8	39.2	57.1	56.9	43.9	53.5
O00273	DFFA	DNA fragmentation factor subunit alpha	Homo sapiens	High	16	903.7	913.9	898.6	935.4	898.5	677	963.5	933	918.9	893.5	878.3
O76075	DFFB	DNA fragmentation factor subunit beta	Homo sapiens	High	5	112.6	115.8	109.2	119.8	139.8	128	131.2	115	128.3	119.1	133.2
O75907	DGAT1	Diacylglycerol O-acyltransferase 1	Homo sapiens	High	3	47.2	44.5	50.7	63.6	66.9	66.2	46.3	73.1	45.9	70.1	62.5
Q96DF8	DGCR14	Protein DGCR14	Homo sapiens	High	13	540.9	516.2	493.7	465.8	563.2	426.1	529.4	531.6	472.1	486.5	486.7
Q14129	DGCR6	Protein DGCR6	Homo sapiens	High	1	43.7	51.1	42.5	40.5	41.6	31.5	34	40.3	45.1	48.2	47.5
Q8WYQ5	DGCR8	Microprocessor complex subunit DGCR8	Homo sapiens	High	14	879.9	859.1	860.5	876.6	760.9	928.4	872	921.6	878.1	811	915.6
P23743	DGKA	Diacylglycerol kinase alpha	Homo sapiens	High	23	1081.3	1126.3	1096.7	1138.8	1166.1	1143.7	1097.5	1126	1078.8	1091.6	1163.1
P52429	DGKE	Diacylglycerol kinase epsilon	Homo sapiens	High	12	531.8	543.4	525.3	574.2	604	686.2	563	574.2	533.7	557.3	558.8
Q86XP1	DGKH	Diacylglycerol kinase eta	Homo sapiens	High	15	308.6	337.2	324.3	335.7	323.3	252.8	323	320.7	311.4	307.6	329.9
Q13574	DGKZ	Diacylglycerol kinase zeta	Homo sapiens	High	19	819.6	769.6	823.1	841.5	790.2	743.3	809.5	813.4	809.3	798.6	838.6
Q16854	DGUOK	Deoxyguanosine kinase, mitochondrial	Homo sapiens	High	5	203.2	204.2	176.4	155.6	165	176.6	154	157.8	208.9	240.7	177.8
Q15392	DHCR24	Delta(24)-sterol reductase	Homo sapiens	High	14	657	684	698.1	885.6	997.5	997.5	926	968	752.6	1058.9	886.6
Q9UBM7	DHCR7	7-dehydrocholesterol reductase	Homo sapiens	High	9	507.8	518.2	520.1	699.7	594	694.4	528.1	608.4	512.9	738.7	579.2
Q86SQ9	DHDDS	Dehydrodolichyl diphosphate synthase complex subunit DHDDS	Homo sapiens	High	5	45.1	42.8	43	41.4	45.6	47.7	42.4	41.5	44.7	48.5	46.6
P00374	DHFR	Dihydrofolate reductase	Homo sapiens	High	14	1099.5	1119.1	1063.5	1728.1	2134.8	2280	1984.9	1839.9	1214	1116.8	1763.9
Q02127	DHODH	Dihydroorotate dehydrogenase (quinone), mitochondrial	Homo sapiens	High	23	1221.7	1155.9	1199.2	1162	1243.8	1313.4	1193.4	1152.2	1193.7	1140.6	1189.2
P49366	DHPS	Deoxyhypusine synthase	Homo sapiens	High	15	1271.1	1308.5	1277	1345.6	1250.6	1301.6	1213.3	1226.1	1327.4	1227.7	1278
Q96LJ7	DHRS1	Dehydrogenase/reductase SDR family member 1	Homo sapiens	High	6	128.9	116.5	111.6	163.6	152.4	127.2	155	151.4	145.8	123.7	138.4
Q6UWP2	DHRS11	Dehydrogenase/reductase SDR family member 11	Homo sapiens	High	8	397.8	395.6	386.6	377	389.3	293.8	365.9	344	397.7	390.3	403.9
Q6UX07	DHRS13	Dehydrogenase/reductase SDR family member 13	Homo sapiens	High	7	135.1	138	137.3	164.8	199	174.7	169.2	168	149.8	164.3	156.3
Q13268	DHRS2	Dehydrogenase/reductase SDR family member 2, mitochondrial	Homo sapiens	High	21	3902.8	4118	3981.7	4521.7	4812.7	5164.7	4335.3	4186.8	4012.4	4596.7	4262.2
Q9BTZ2	DHRS4	Dehydrogenase/reductase SDR family member 4	Homo sapiens	High	12	961.2	960.5	961.8	988.6	971.3	1090.2	1015.1	965.4	1001.3	949.9	955.6
Q9Y394	DHRS7	Dehydrogenase/reductase SDR family member 7	Homo sapiens	High	8	356.3	357.7	341.8	388.8	472.1	436.4	390.6	388.1	375.6	370.5	367.3
Q6IAN0	DHRS7B	Dehydrogenase/reductase SDR family member 7B	Homo sapiens	High	7	314	326	338.3	381.2	432.9	437.8	394.3	375	341.4	348.6	363.6
Q8N5I4	DHRSX	Dehydrogenase/reductase SDR family member on chromosome X	Homo sapiens	High	2	60.9	51.1	56	57.5	59.9	62.4	65.5	56.4	61.4	63.6	59.3
Q96HY7	DHTKD1	Probable 2-oxoglutarate dehydrogenase E1 component DHKTD1, mitochondrial	Homo sapiens	High	9	241.6	251.2	247.6	253.2	247.5	186.8	254.6	228.1	241.7	215.2	233.8
O43143	DHX15	Pre-mRNA-splicing factor ATP-dependent RNA helicase DHX15	Homo sapiens	High	47	7595	7838	7605.2	7596.7	7982.9	8556.3	7726.4	7582.1	7825.8	7932.7	7452
O60231	DHX16	Putative pre-mRNA-splicing factor ATP-dependent RNA helicase DHX16	Homo sapiens	High	43	2654.1	2527.2	2586.7	2755.6	2748.7	2883.6	2715.6	2836.2	2557	2610.6	2639.1
Q7Z478	DHX29	ATP-dependent RNA helicase DHX29	Homo sapiens	High	42	2623.5	2659.1	2604.1	2632.2	2835.3	2589.9	2767.4	2772	2683	2555	2653.5
Q7L2E3-2	DHX30	Isoform 2 of Putative ATP-dependent RNA helicase DHX30	Homo sapiens	High	16	1593.5	1502.3	1553.3	1526.1	1568.2	1535.7	1358.3	1333.3	1478.9	1426.5	1461.4
Q7L2E3	DHX30	Putative ATP-dependent RNA helicase DHX30	Homo sapiens	High	57	3645.9	3624	3560.8	3584.8	4062.4	4141.9	3512	3626.5	3601	3573.2	3478.9
Q9H6R0	DHX33	Putative ATP-dependent RNA helicase DHX33	Homo sapiens	High	13	639.5	606.9	606.8	573.1	687.9	555.6	627.3	636.5	605.3	598.5	604.1
Q14147	DHX34	Probable ATP-dependent RNA helicase DHX34	Homo sapiens	High	16	548.6	503.6	540.5	533.5	553.5	563.1	528.4	545.7	528.9	505.7	579.1
Q9H5Z1	DHX35	Probable ATP-dependent RNA helicase DHX35	Homo sapiens	High	18	702.3	687.6	674	664.8	730.9	735.2	710.5	726.8	662.4	728.4	700
Q9H2U1	DHX36	ATP-dependent RNA helicase DHX36	Homo sapiens	High	43	3355.6	3335.9	3445.1	3495.2	3690.2	3829.4	3468.9	3451.7	3199.2	3397	3466.8
Q8IY37	DHX37	Probable ATP-dependent RNA helicase DHX37	Homo sapiens	High	37	1747.2	1682.5	1768	1794.2	1541.3	1200.6	1589.3	1716	1707.7	1764.6	1791
Q92620	DHX38	Pre-mRNA-splicing factor ATP-dependent RNA helicase PRP16	Homo sapiens	High	30	1487.2	1508.2	1502.9	1480.4	1476.2	1487.5	1544.9	1590.4	1460.8	1420	1499.5
Q8IX18	DHX40	Probable ATP-dependent RNA helicase DHX40	Homo sapiens	High	15	849.3	880.7	889.2	899.4	885.7	839.8	939.2	933.9	917.5	824.6	911.5
Q6P158	DHX57	Putative ATP-dependent RNA helicase DHX57	Homo sapiens	High	26	833.6	848.8	842.8	902.1	995.8	924.4	912.2	993.9	840.2	887.4	892.5
Q96C10	DHX58	Probable ATP-dependent RNA helicase DHX58	Homo sapiens	High	4	365.2	351.2	336.7	350.1	327.5	247.2	348.1	344.6	344.9	334.6	372.3
Q14562	DHX8	ATP-dependent RNA helicase DHX8	Homo sapiens	High	44	2112.6	2043.8	2134.1	2219.1	2069.1	1989	2172.1	2230	2117.5	2001.3	2144.6
Q08211	DHX9	ATP-dependent RNA helicase A	Homo sapiens	High	66	8049.5	8089	8086.5	8039.5	8330.8	8989.7	8078.8	8181.3	8282.3	8366.9	7877
Q9NR28	DIABLO	Diablo homolog, mitochondrial	Homo sapiens	High	9	647.1	662.9	663.2	630.8	684.3	467.6	556.4	599.4	701.3	622.5	684.8
O60610	DIAPH1	Protein diaphanous homolog 1	Homo sapiens	High	59	5196.6	5183.7	5148.2	5200.4	5135.2	4509.1	5791.8	5736.1	4912.4	5189.8	5031.1
O60879	DIAPH2	Protein diaphanous homolog 2	Homo sapiens	High	35	1720.7	1772.9	1694.8	1688.2	1693.4	1750	1754.3	1896	1717	1669.1	1664.9
Q9NSV4	DIAPH3	Protein diaphanous homolog 3	Homo sapiens	High	15	565.8	595.5	571.1	609.1	675.4	627.6	694	703	593.8	635.1	680
Q9UPY3	DICER1	Endoribonuclease Dicer	Homo sapiens	High	62	2905.1	2968.4	2888.9	3156.1	3022	2832.1	2918.5	3044.3	2883	2883.9	2998.1
Q9BTC0	DIDO1	Death-inducer obliterator 1	Homo sapiens	High	73	4080.9	3945.9	4168.5	3784	4081.7	3715.6	4095	3975.1	3892	3797.9	3880.2
Q68CQ4	DIEXF	Digestive organ expansion factor homolog	Homo sapiens	High	20	1140.5	1096.2	1134.6	1099.6	809.5	710.8	968.8	987.4	1094.9	1059.3	1070.5
Q9UNQ2	DIMT1	Probable dimethyladenosine transferase	Homo sapiens	High	19	1833.8	1813.6	1806.2	1753.3	1684.9	1660.2	1646.7	1553.7	1691.5	1770.7	1797.6
Q14689	DIP2A	Disco-interacting protein 2 homolog A	Homo sapiens	High	2	38.4	40.1	31.5	35.8	30.7	29.1	28	35.4	39.4	41.2	34.7
Q9P265	DIP2B	Disco-interacting protein 2 homolog B	Homo sapiens	High	42	2015.4	2053.8	2090.3	2142.5	1906.8	1869.3	2053.6	2029.7	2025.5	2050.2	2119.6
Q9Y2L1	DIS3	Exosome complex exonuclease RRP44	Homo sapiens	High	44	3437.5	3327.4	3515.8	3558.7	3700	3780.3	3553.2	3529.7	3435.4	3223.8	3476.9
Q8TF46	DIS3L	DIS3-like exonuclease 1	Homo sapiens	High	22	864.9	857.8	849.3	902.3	999.5	1000.1	850.5	905	878.1	880.9	869.1
Q8IYB7	DIS3L2	DIS3-like exonuclease 2	Homo sapiens	High	19	1194.5	1225.8	1228.7	1217.6	1222.9	1207.3	1171.5	1217.6	1249.9	1186.2	1242.4
Q9NRI5	DISC1	Disrupted in schizophrenia 1 protein	Homo sapiens	High	3	90.7	92.7	98.5	86.8	108.3	89.8	107.9	90.7	85.9	87.6	84
O60832	DKC1	H/ACA ribonucleoprotein complex subunit 4	Homo sapiens	High	28	3202.5	3149.3	3199.6	3109.1	2995.4	3517.3	3049.5	2991.1	3114.2	3067.6	3058.7
P10515	DLAT	Dihydrolipoyllysine-residue acetyltransferase component of pyruvate dehydrogenase complex, mitochondrial	Homo sapiens	High	18	1465	1445.5	1504.8	1456	1654.4	1549.3	1496.8	1499.4	1449.6	1349.9	1370
P09622	DLD	Dihydrolipoyl dehydrogenase, mitochondrial	Homo sapiens	High	21	2866.9	2649.3	2957.4	2821.7	2793.8	2893	2840.8	2620.5	2669.8	2671.9	2903.6
Q6UYE1	DLEU7	Leukemia-associated protein 7	Homo sapiens	Medium	1	11.5	9.7	12.5	9.6	12.4	11	9.9	10.6	9.3	9	12.3
Q12959	DLG1	Disks large homolog 1	Homo sapiens	High	15	776.1	764.4	775.7	777.2	711.5	587.3	701.3	705.1	744.6	693.4	741.2
Q15700	DLG2	Disks large homolog 2	Homo sapiens	High	1	18.2	21.3	19.9	13.9	23.1	10.3	15.8	14.6	24.2	22.5	16.4
Q9Y2H0	DLGAP4	Disks large-associated protein 4	Homo sapiens	High	10	411.2	410.5	410.7	442.2	333.5	339.8	433.9	430	394.6	413.8	402.8
Q15398	DLGAP5	Disks large-associated protein 5	Homo sapiens	High	37	2292.2	2314.7	2257.2	1964.1	2961.5	3091	2375.3	2377.7	2171.1	2073.6	2084.8
P36957	DLST	Dihydrolipoyllysine-residue succinyltransferase component of 2-oxoglutarate dehydrogenase complex, mitochondrial	Homo sapiens	High	17	1595.4	1553.1	1545.5	1406.8	1553.1	1357.7	1435.5	1304.5	1499.8	1376.6	1400
Q9NPF5	DMAP1	DNA methyltransferase 1-associated protein 1	Homo sapiens	High	13	936	903.8	920.1	899.2	936.5	1073.2	837.7	864.1	907.6	799.6	874.3
P11532	DMD	Dystrophin	Homo sapiens	High	2	97.3	93.6	93.4	99.4	101.6	129	109.1	155.1	106.8	158.6	115.2
Q9Y485	DMXL1	DmX-like protein 1	Homo sapiens	High	29	1310.6	1279.9	1287.7	1244.7	1204.8	1097.9	1221.8	1258	1265.1	1216.6	1285.5
Q8TDJ6	DMXL2	DmX-like protein 2	Homo sapiens	High	9	277	306.6	275.4	299.9	250.4	245.7	288.5	285.9	276	275.8	288.9
P51530	DNA2	DNA replication ATP-dependent helicase/nuclease DNA2	Homo sapiens	High	32	1320.2	1301.4	1284	1303.3	1136.8	878.4	1203	1236.2	1215.4	1329.6	1377.6
Q9NVR5	DNAAF2	Protein kintoun	Homo sapiens	High	8	311.8	313.4	311.9	340.6	351.8	342.4	331	344.9	310.1	308.3	341.4
Q86Y56	DNAAF5	Dynein assembly factor 5, axonemal	Homo sapiens	High	29	1940.6	1867.9	1849.8	2030.3	2276.6	1666.5	1997.1	2069.4	1822.3	1786.5	1923.2
Q96DT5	DNAH11	Dynein heavy chain 11, axonemal	Homo sapiens	High	2	76	74.4	75.5	63.7	70.6	64.2	66.8	68.1	87.9	72.4	79.3
Q0VDD8	DNAH14	Dynein heavy chain 14, axonemal	Homo sapiens	Medium	1	13.9	25.8	10.9	18.3	8.3	27.2	8.1	20.9	26.3	18.7	12.6
Q9UFH2	DNAH17	Dynein heavy chain 17, axonemal	Homo sapiens	High	1	80.2	64.1	84.8	85.4	77.7	69	85.8	70.4	66.7	68.8	85
P31689	DNAJA1	DnaJ homolog subfamily A member 1	Homo sapiens	High	28	3654.2	3891.1	3857.8	3860.5	4408.1	5472.1	4338.9	4203.6	3982.1	4221.7	4358
O60884	DNAJA2	DnaJ homolog subfamily A member 2	Homo sapiens	High	21	2168.3	2326.4	2227	2229.4	2272.7	2777	2190.6	2320.6	2378.6	2134.5	2158.6
Q96EY1	DNAJA3	DnaJ homolog subfamily A member 3, mitochondrial	Homo sapiens	High	16	1196.9	1193.7	1256.8	1195.8	1152	1389.2	1106.1	1099	1144.2	1117.4	1138
Q96EY1-2	DNAJA3	Isoform 2 of DnaJ homolog subfamily A member 3, mitochondrial	Homo sapiens	High	4	95	79.4	91.4	92.4	93.6	108.7	85.5	83.3	85.5	83.8	83.8
P25685	DNAJB1	DnaJ homolog subfamily B member 1	Homo sapiens	High	26	2506	2575.1	2528.7	2460	2350.9	2913.9	2457.2	2460.9	2665	2449.5	2518.3
Q9UBS4	DNAJB11	DnaJ homolog subfamily B member 11	Homo sapiens	High	18	1290.4	1225.2	1257.4	1383.4	1290.1	1754.3	1237.5	1290	1280.5	1220.4	1276.8
Q9NXW2	DNAJB12	DnaJ homolog subfamily B member 12	Homo sapiens	High	11	635.4	602.5	640.3	624	709.9	762.9	648.8	630.9	596.8	641.8	647.1
Q8TBM8	DNAJB14	DnaJ homolog subfamily B member 14	Homo sapiens	High	9	495.9	460.7	474.4	482.5	538	521.3	507.5	484.3	455.4	446.8	502.6
Q9UDY4	DNAJB4	DnaJ homolog subfamily B member 4	Homo sapiens	High	11	522.6	528	533.5	540.2	527.4	637.4	556.1	571.9	532.7	514.6	527.4
O75953	DNAJB5	DnaJ homolog subfamily B member 5	Homo sapiens	High	6	280.3	278.1	288.4	255.2	221.2	196.3	238.8	269.8	283.7	274.5	276.9
O75190	DNAJB6	DnaJ homolog subfamily B member 6	Homo sapiens	High	13	989.1	915.3	954.1	1045.8	873.3	954	877.8	954.3	947.6	964.6	989.9
Q9UBS3	DNAJB9	DnaJ homolog subfamily B member 9	Homo sapiens	High	1	14.6	15	15.9	12.8	14.7	12.2	15	17.3	16	16.1	13.3
Q96KC8	DNAJC1	DnaJ homolog subfamily C member 1	Homo sapiens	High	10	374.1	342.6	364.1	370.7	392.1	370.6	412.6	399.5	352.3	363.9	393.4
Q8IXB1	DNAJC10	DnaJ homolog subfamily C member 10	Homo sapiens	High	19	1613.2	1629	1567.9	1678.4	1677.6	1770.2	1704.7	1696.7	1607.4	1641	1646.5
Q9NVH1	DNAJC11	DnaJ homolog subfamily C member 11	Homo sapiens	High	18	812.1	803.5	846.2	817.4	882.5	854.5	819.8	825.8	839.3	810.9	787.7
O75165	DNAJC13	DnaJ homolog subfamily C member 13	Homo sapiens	High	61	2916.9	2793.9	2930.1	3019.8	3126.2	2770.3	2884.2	2950.4	2750	2764.9	2939.4
Q6Y2X3	DNAJC14	DnaJ homolog subfamily C member 14	Homo sapiens	High	3	53.6	50.2	53.3	52	43.7	42.8	41.4	39.4	55	47	49.2
Q9Y5T4	DNAJC15	DnaJ homolog subfamily C member 15	Homo sapiens	High	5	259.3	254	241.9	240.1	233.3	176.7	231.4	228.1	258	249.7	260.1
Q9Y2G8	DNAJC16	DnaJ homolog subfamily C member 16	Homo sapiens	High	17	709.4	675.3	689.5	729.6	721	810.1	706.4	718.5	683.6	677.6	723.6
Q9NVM6	DNAJC17	DnaJ homolog subfamily C member 17	Homo sapiens	High	10	738.1	749.5	759.6	724.3	737	778.9	762.3	743.1	781.7	713.8	756.3
Q96DA6	DNAJC19	Mitochondrial import inner membrane translocase subunit TIM14	Homo sapiens	High	8	1039.3	941.6	978.2	905.4	1007.2	838.5	858.1	873.3	966.1	844.9	959.6
Q99543	DNAJC2	DnaJ homolog subfamily C member 2	Homo sapiens	High	27	1710.6	1721.5	1819.6	1701.2	1824.3	1959.8	1799	1785.1	1732.4	1618.6	1774
Q5F1R6	DNAJC21	DnaJ homolog subfamily C member 21	Homo sapiens	High	15	674.1	691.4	714.3	724.5	832.3	878.1	762.9	803.5	737.4	717.1	743
Q6P3W2	DNAJC24	DnaJ homolog subfamily C member 24	Homo sapiens	High	1	56.2	46.5	54.2	43.7	36.1	35.3	35.3	41.3	42.5	45.9	46.5
Q9H1X3	DNAJC25	DnaJ homolog subfamily C member 25	Homo sapiens	High	4	149.4	151	147.4	143.4	187.4	212	137.5	155.7	135	175.4	159.9
Q13217	DNAJC3	DnaJ homolog subfamily C member 3	Homo sapiens	High	20	953.7	918.8	929.4	934.2	893.1	993.9	964.6	876.4	944.8	845.9	913.1
Q96LL9	DNAJC30	DnaJ homolog subfamily C member 30	Homo sapiens	High	2	12	12.7	9.1	15.7	14.3	7.6	13	9.1	12.7	12.9	12.6
Q9H3Z4	DNAJC5	DnaJ homolog subfamily C member 5	Homo sapiens	High	5	228.7	241.2	223.9	254.2	202.8	322.1	188.6	247.5	209.6	253.5	264.2
Q99615	DNAJC7	DnaJ homolog subfamily C member 7	Homo sapiens	High	39	4249.5	4518.6	4414.7	4094.8	4801.1	4793.6	4773.9	4770.2	4398.6	4233.9	4283.8
O75937	DNAJC8	DnaJ homolog subfamily C member 8	Homo sapiens	High	24	2520.3	2662.6	2590	2521.4	2246.6	2900	2603.7	2523.5	2797.3	2747.9	2592.9
Q8WXX5	DNAJC9	DnaJ homolog subfamily C member 9	Homo sapiens	High	20	2698.9	2528.3	2758.6	2686.2	2470.1	2789.1	2555.1	2543	2575	2731.8	2632.4
Q4LDG9	DNAL1	Dynein light chain 1, axonemal	Homo sapiens	Medium	1	17.4	17.5	17.5	14.2	23.5	17.3	17.1	18	18.4	21.4	15.7
O00115	DNASE2	Deoxyribonuclease-2-alpha	Homo sapiens	High	4	223	224.4	242.6	235.1	216.1	214.8	218.3	254.5	229.4	236.4	211.8
Q5SXM8	DNLZ	DNL-type zinc finger protein	Homo sapiens	High	3	45.5	49.9	58.7	57.4	96.3	86.1	69.5	64.4	64.6	49.8	51.2
O00429	DNM1L	Dynamin-1-like protein	Homo sapiens	High	41	3466.9	3516.3	3610.8	3362.6	3710.1	3290	3588.7	3606.8	3473.8	3404	3173.9
O00429-8	DNM1L	Isoform 8 of Dynamin-1-like protein	Homo sapiens	High	8	31.9	27.7	26	27.3	31.5	29.3	36.8	31.2	31.4	26.3	25.5
P50570	DNM2	Dynamin-2	Homo sapiens	High	39	7278.5	7082.4	7120	6810.5	7107	6104.8	7195.9	7041.3	6729.6	6608.4	6770
Q9UQ16	DNM3	Dynamin-3	Homo sapiens	High	2	271.7	254.9	269.3	259.6	267.6	239.9	244.4	253.7	250.3	230	261.5
Q6XZF7	DNMBP	Dynamin-binding protein	Homo sapiens	High	3	44.1	34.3	42.5	35.6	41.1	31.6	44.6	36.4	41.1	37.9	34.3
P26358-2	DNMT1	Isoform 2 of DNA (cytosine-5)-methyltransferase 1	Homo sapiens	High	17	36.4	22.8	33.1	35.2	21.6	18.5	30.8	26.2	26.7	25.6	26.4
P26358	DNMT1	DNA (cytosine-5)-methyltransferase 1	Homo sapiens	High	86	7540.6	7632.1	7716.4	7558	7042.6	7222.2	7377.8	7425.1	7731.2	7634.9	7759.2
Q9Y6K1	DNMT3A	DNA (cytosine-5)-methyltransferase 3A	Homo sapiens	High	31	2171.7	2106.6	2185.8	2273	2192.2	2124.7	2170.5	2167.6	2199.6	2208.8	2275.7
Q9UBC3	DNMT3B	DNA (cytosine-5)-methyltransferase 3B	Homo sapiens	High	13	576.2	589.8	588.6	584.6	534.4	469.1	530.3	570.2	606.4	600	572
Q9ULA0	DNPEP	Aspartyl aminopeptidase	Homo sapiens	High	18	1198.4	1155.5	1207.1	1181.5	1321.4	1226.2	1185.9	1190.2	1196	1135.6	1150.5
O43598	DNPH1	2'-deoxynucleoside 5'-phosphate N-hydrolase 1	Homo sapiens	High	4	627	592.4	582.7	617.5	546.9	474	468.5	462.5	527.3	568.5	562
Q9H147	DNTTIP1	Deoxynucleotidyltransferase terminal-interacting protein 1	Homo sapiens	High	7	270.3	256.4	345	267.1	237.4	251.8	248.7	265	227.9	263.4	261.4
Q5QJE6	DNTTIP2	Deoxynucleotidyltransferase terminal-interacting protein 2	Homo sapiens	High	29	2346.1	2241.9	2372.2	2207.2	1604.4	1268.6	2016.7	2011.8	2172.4	2123.5	2210.1
Q96BY6	DOCK10	Dedicator of cytokinesis protein 10	Homo sapiens	High	41	2424.4	2330.1	2393.6	2393	2392.1	2323.4	2344.7	2354.1	2262.4	2310.6	2361.2
Q5JSL3	DOCK11	Dedicator of cytokinesis protein 11	Homo sapiens	High	29	1570.6	1525.1	1592.6	1633.3	1436.2	1523.4	1582.8	1555.1	1476	1592.5	1667.6
Q92608	DOCK2	Dedicator of cytokinesis protein 2	Homo sapiens	High	82	9675.3	9579.1	9581.4	9860.8	9382	9315	9399	9721.8	9394.6	9667.8	9763
Q96HP0	DOCK6	Dedicator of cytokinesis protein 6	Homo sapiens	High	1	43.9	55.6	58.3	48	76.4	57.4	58.4	65.2	47.5	51	75
Q96N67	DOCK7	Dedicator of cytokinesis protein 7	Homo sapiens	High	3	98.1	95.7	91	90.5	98.4	111.2	117.1	97.9	105.3	83.5	99.6
Q8NF50	DOCK8	Dedicator of cytokinesis protein 8	Homo sapiens	High	45	2466.8	2478.9	2523.4	2601.5	2649.3	2620.4	2411.9	2538.2	2435.2	2506.5	2539.9
Q9BU89	DOHH	Deoxyhypusine hydroxylase	Homo sapiens	High	10	423.4	417.2	408.5	365.4	548.9	353.5	396.1	374.1	382.9	342.9	374.1
Q99704	DOK1	Docking protein 1	Homo sapiens	High	4	193.6	202.9	208.6	227.7	210.1	203.7	221.1	211.6	211.1	210.2	210.1
O60496	DOK2	Docking protein 2	Homo sapiens	High	11	475.5	490.8	482.3	485.7	530	506.5	503.3	501.4	487.5	482.4	500.6
Q9UPQ8	DOLK	Dolichol kinase	Homo sapiens	High	1	12.2	10.4	13.6	25	15.4	30.7	16.7	15.8	13.4	36.6	14.6
Q9NYP3	DONSON	Protein downstream neighbor of Son	Homo sapiens	High	2	76.3	94	75.1	94.6	94.4	75.8	100.7	101.3	79.9	88.6	81.9
Q5JWR5	DOPEY1	Protein dopey-1	Homo sapiens	High	1	19.8	20.9	18.5	22.3	22.3	14.4	27.3	26.4	17.3	19.6	22.3
Q9Y3R5	DOPEY2	Protein dopey-2	Homo sapiens	High	5	173.4	170.9	193.7	188.1	164.9	180.9	163.6	171	175.3	185.7	172.2
Q8TEK3	DOT1L	Histone-lysine N-methyltransferase, H3 lysine-79 specific	Homo sapiens	High	7	216	196.2	196.2	190	209.5	165.1	186.1	193.8	187.3	179	221.9
Q9H3H5	DPAGT1	UDP-N-acetylglucosamine--dolichyl-phosphate N-acetylglucosaminephosphotransferase	Homo sapiens	High	2	255.5	280.6	260.2	279.3	326.1	349.6	280.3	311	291.3	300.3	256.6
Q9BVM2	DPCD	Protein DPCD	Homo sapiens	High	1	51.4	47.9	49.9	46.3	47.3	39.7	46.9	47.2	50.6	40	50.6
Q92785	DPF2	Zinc finger protein ubi-d4	Homo sapiens	High	17	592.1	639.6	652.4	619.5	635.7	551.2	643.3	654	671	561.7	621.4
Q9BZG8	DPH1	Diphthamide biosynthesis protein 1	Homo sapiens	High	6	196.7	186.4	202.5	211.2	245.3	240	204	225.7	201.8	213	194
Q9BQC3	DPH2	Diphthamide biosynthesis protein 2	Homo sapiens	High	10	519.4	487.1	484.6	493.5	592.2	567.1	517.4	501.4	480	451.5	486.2
Q96FX2	DPH3	DPH3 homolog	Homo sapiens	High	1	10.3	12.4	11.5	10.6	16.1	11.3	9.5	11.9	11.9	14.8	13
Q9H2P9	DPH5	Diphthine methyl ester synthase	Homo sapiens	High	8	562.4	690	549.1	552	517.2	731	509.8	575.3	684.7	670.3	570.2
Q7L8W6	DPH6	Diphthine--ammonia ligase	Homo sapiens	High	9	420	411.2	388.3	434.2	445.2	460.6	426.6	414.5	409.3	392.7	430.6
Q9BTV6	DPH7	Diphthine methyltransferase	Homo sapiens	High	2	84.8	71.5	87.3	92.1	23.4	75.4	70.2	19	73.2	30.3	49.3
O60762	DPM1	Dolichol-phosphate mannosyltransferase subunit 1	Homo sapiens	High	13	806.9	764.1	803.1	882.9	831	951.6	765.2	831.7	792.5	879.5	807.6
Q9P2X0	DPM3	Dolichol-phosphate mannosyltransferase subunit 3	Homo sapiens	High	2	67.5	66.8	62.2	73.4	87.8	77.9	71.5	69.5	74.7	72.9	72.7
Q9NY33	DPP3	Dipeptidyl peptidase 3	Homo sapiens	High	31	1909.8	1968.8	1945.7	1969.9	2142.5	1938.7	1912.3	1961.2	1928.4	1875.4	1804
Q9UHL4	DPP7	Dipeptidyl peptidase 2	Homo sapiens	High	11	665.1	644.7	664.5	744.8	765.3	799.4	628.2	678.5	654.6	736.3	702.7
Q6V1X1	DPP8	Dipeptidyl peptidase 8	Homo sapiens	High	2	65.8	53	62.4	73.5	61.8	72.3	57.4	76.4	61.6	60	66.9
Q86TI2	DPP9	Dipeptidyl peptidase 9	Homo sapiens	High	24	1310.5	1327.2	1315.3	1316.4	1277	1414.7	1381.5	1350.4	1324.7	1362.5	1342.9
Q2PZI1	DPY19L1	Probable C-mannosyltransferase DPY19L1	Homo sapiens	High	2	83.5	85.2	72.6	95.6	71.8	97	57.7	80.6	72.2	92.6	85.7
A0A1B0GW05	DPY19L1	Probable C-mannosyltransferase DPY19L1	Homo sapiens	High	1	14.8	16	9.9	13.3	13.2	16.1	12.4	11	10.8	13.6	14
Q12882	DPYD	Dihydropyrimidine dehydrogenase [NADP(+)]	Homo sapiens	High	25	1039.9	1063.9	1047.2	1099.6	944.4	873.2	1108.1	1027.4	1061.8	1004.4	1115.1
A0A1C7CYX9	DPYSL2	Dihydropyrimidinase-related protein 2	Homo sapiens	High	9	103.7	89.3	97.5	95.9	81.6	74	85	83.9	98.9	88	94.7
Q16555	DPYSL2	Dihydropyrimidinase-related protein 2	Homo sapiens	High	27	4140	4231.2	4103.4	4455.7	3750	3700.3	3875.3	3869.6	4261.8	4130.2	4316.6
Q9BPU6	DPYSL5	Dihydropyrimidinase-related protein 5	Homo sapiens	Medium	1	1054.2	1000.5	1062	1025.8	896.2	1067.1	943.3	960.8	970.2	1095.9	1041.9
Q01658	DR1	Protein Dr1	Homo sapiens	High	5	182.7	213	211.7	209.4	200	185.3	179.6	203.3	191.2	182.6	196.7
Q6UX65	DRAM2	DNA damage-regulated autophagy modulator protein 2	Homo sapiens	High	2	161.7	166	178.8	175.9	209.1	181.5	147.5	178.2	156.9	186.4	176.1
Q14919	DRAP1	Dr1-associated corepressor	Homo sapiens	High	5	1371.3	1316.1	1352	1379.4	1180.2	1449.4	1253.4	1258.6	1373.9	1298.8	1346.8
Q9Y295	DRG1	Developmentally-regulated GTP-binding protein 1	Homo sapiens	High	19	2407.1	2397.5	2421.9	2465.7	2637	2459.1	2483.8	2378.2	2469.4	2378.3	2345.8
P55039	DRG2	Developmentally-regulated GTP-binding protein 2	Homo sapiens	High	16	1710.7	1739.5	1709.8	1803.2	1746.2	1944.3	1754	1737	1775.8	1698.5	1737.6
Q9NRR4	DROSHA	Ribonuclease 3	Homo sapiens	High	6	293	266.5	307.5	285.6	281.6	305.6	309.3	322.2	300.8	285.5	293.1
Q08554	DSC1	Desmocollin-1	Homo sapiens	High	5	254.8	333.8	334.2	202.8	317.3	229.5	240.3	193.6	229.7	443.3	248.9
Q14574	DSC3	Desmocollin-3	Homo sapiens	High	4	86.7	69.4	82.6	60.5	90.1	72.4	62.2	56.1	69	118.7	76
Q9BVC3	DSCC1	Sister chromatid cohesion protein DCC1	Homo sapiens	High	9	404.7	410.9	405.9	417.3	389.7	323.5	402	403.2	420.1	381.5	428.1
O14972	DSCR3	Down syndrome critical region protein 3	Homo sapiens	High	7	236.4	245.1	237.7	231.1	290.1	248.1	253.1	242.8	258.9	218.9	252.3
Q02413	DSG1	Desmoglein-1	Homo sapiens	High	12	693.5	697.4	720.6	523.2	845.8	588.5	601.3	493.3	567.7	1018.8	605.8
Q14126	DSG2	Desmoglein-2	Homo sapiens	High	23	1143.6	1074.6	1121.3	1245.6	998.6	936.9	1112	1163.9	1096.5	1167.8	1211.8
Q9H410	DSN1	Kinetochore-associated protein DSN1 homolog	Homo sapiens	High	19	1247.3	1191.5	1278.8	1201.8	1040.4	911.4	1158.7	1133.4	1229.6	1191.1	1215.3
P15924	DSP	Desmoplakin	Homo sapiens	High	53	2334.2	2137.3	2884.3	1796.9	4048.6	1668.9	2309.8	1766.4	2245.3	5263.1	2003.7
Q03001	DST	Dystonin	Homo sapiens	High	4	127.1	116.5	115.8	116.9	121.9	107.6	110.4	108.8	114.3	108.9	110.1
P60981	DSTN	Destrin	Homo sapiens	High	13	1501.9	1556	1523.4	1546	1509.5	1399	1553.3	1510.6	1624.2	1478.8	1603.7
Q6XUX3	DSTYK	Dual serine/threonine and tyrosine protein kinase	Homo sapiens	High	2	52.1	82.4	45.2	49.7	23.3	56.6	62.6	81.2	64.7	63.3	50.5
Q8TEA8	DTD1	D-tyrosyl-tRNA(Tyr) deacylase 1	Homo sapiens	High	7	427.4	471	405.7	420.6	406.7	535.2	413.1	444.6	497.7	445.9	432.5
Q96FN9	DTD2	Probable D-tyrosyl-tRNA(Tyr) deacylase 2	Homo sapiens	High	3	95.8	95.1	92.9	96.7	91.3	103.9	97.4	92.4	100.1	97.6	107.2
Q9NZJ0	DTL	Denticleless protein homolog	Homo sapiens	High	16	1022.4	1031.5	1018.6	1117.5	974.1	1008.7	1034	946.6	1021.4	944	1096
O60941	DTNB	Dystrobrevin beta	Homo sapiens	Medium	1	205.3	207.8	191.9	178.7	160.1	180	201.8	193.3	212.6	195.5	207
Q96EV8	DTNBP1	Dysbindin	Homo sapiens	High	6	395.6	413.2	418.7	394.6	370	346.1	438.9	427.5	409.7	406.9	414.2
Q8N5C7	DTWD1	DTW domain-containing protein 1	Homo sapiens	High	6	282	252.6	269.4	280.1	324.7	305.5	260.5	269.5	267.9	263.7	259.7
Q8NBA8	DTWD2	DTW domain-containing protein 2	Homo sapiens	High	6	167.7	213.2	216	212.4	213.1	199.8	238.2	225.2	222.7	200	203.7
Q86UW9	DTX2	Probable E3 ubiquitin-protein ligase DTX2	Homo sapiens	High	4	43.8	44	39.8	38.8	51.1	33.7	57.7	43.9	46.2	39.7	41.6
Q8TDB6	DTX3L	E3 ubiquitin-protein ligase DTX3L	Homo sapiens	High	29	2058.8	2170.7	2092.3	2167.3	1869.8	1721.9	2016.6	2023	2135.4	2042.7	2165
P23919	DTYMK	Thymidylate kinase	Homo sapiens	High	15	1011.8	1134.3	1110.3	1075.1	1317.4	1106.6	1135.1	1019	1159.7	1058.7	1090.3
Q6P1R4	DUS1L	tRNA-dihydrouridine(16/17) synthase [NAD(P)(+)]-like	Homo sapiens	High	8	294.1	300.7	287.1	274.9	253.4	269.3	273.6	268.2	261.4	267.6	301.3
Q9NX74	DUS2	tRNA-dihydrouridine(20) synthase [NAD(P)+]-like	Homo sapiens	High	8	264.8	262.3	273.7	261.2	309.9	268.1	285.4	269.9	264.3	241.3	279.6
Q96G46	DUS3L	tRNA-dihydrouridine(47) synthase [NAD(P)(+)]-like	Homo sapiens	High	29	2047.9	1924.9	1986.8	1912.8	2178	2194.2	1965.3	1938.4	1891.7	1834.9	1963.7
O75319	DUSP11	RNA/RNP complex-1-interacting phosphatase	Homo sapiens	High	12	604.7	620.7	620.8	583.9	542.3	422.7	576.5	579.4	613.8	586.1	613.6
Q9UNI6	DUSP12	Dual specificity protein phosphatase 12	Homo sapiens	High	16	923.5	938.1	904.1	885.3	1046.4	1071.9	1003.6	953	955.8	905.5	910.5
Q8WTR2	DUSP19	Dual specificity protein phosphatase 19	Homo sapiens	Medium	1	25.4	28.6	25.7	29.6	21.2	25.4	22.6	27.3	27.3	28.5	26.8
P51452	DUSP3	Dual specificity protein phosphatase 3	Homo sapiens	High	7	251.3	241.1	241.1	248.1	276.7	205.2	226.1	223	265.7	219.5	241.8
Q16828	DUSP6	Dual specificity protein phosphatase 6	Homo sapiens	High	2	63.4	49.8	54.7	51.7	35.4	12.9	45.4	45.8	57.7	49.2	59
Q16829	DUSP7	Dual specificity protein phosphatase 7	Homo sapiens	High	3	75.8	65.4	82.5	78.1	74.2	56.1	86.7	67.2	73.6	74.2	88.5
Q13202	DUSP8	Dual specificity protein phosphatase 8	Homo sapiens	Medium	2	131.5	131.2	145.6	114.3	132.8	124.8	103.1	109.7	113	124.7	129.2
P33316-2	DUT	Isoform 2 of Deoxyuridine 5'-triphosphate nucleotidohydrolase, mitochondrial	Homo sapiens	Medium	6	627.1	579.3	572	550.7	562.2	477.3	496.4	484.8	577.3	513.8	584.5
P33316	DUT	Deoxyuridine 5'-triphosphate nucleotidohydrolase, mitochondrial	Homo sapiens	High	14	1187.3	1090	1138.9	1244	1162.6	1122.1	971.6	1010	1090.7	974.8	1243.1
O14641	DVL2	Segment polarity protein dishevelled homolog DVL-2	Homo sapiens	High	10	768.7	725.2	770.1	798	780.2	770.5	704.9	751.5	707.4	709.8	789.2
Q92997	DVL3	Segment polarity protein dishevelled homolog DVL-3	Homo sapiens	High	1	88.1	74.3	79.4	79.3	56.5	77.5	69.9	70	74.8	63.1	95.3
O77932	DXO	Decapping and exoribonuclease protein	Homo sapiens	High	5	107.3	110.6	114.8	117	121.7	129.3	112	123.7	117.1	111.2	111.6
Q7RTS9	DYM	Dymeclin	Homo sapiens	High	6	232.3	223.3	223.1	258.5	255.8	287.9	241.9	264.9	237.5	297.6	252.8
Q14204	DYNC1H1	Cytoplasmic dynein 1 heavy chain 1	Homo sapiens	High	234	22891.9	23057.3	22414.7	22771.2	23797.4	22297.6	23272.8	23194.1	22839.3	22735.1	22232.8
Q13409-3	DYNC1I2	Isoform 2C of Cytoplasmic dynein 1 intermediate chain 2	Homo sapiens	High	4	66.5	72.3	67.6	71	37.4	25.9	65.2	64.8	66.4	60.5	68.5
Q13409	DYNC1I2	Cytoplasmic dynein 1 intermediate chain 2	Homo sapiens	High	20	962.7	961.6	953.3	972.7	797.6	926.5	900.3	948	974	912.6	948.2
Q9Y6G9	DYNC1LI1	Cytoplasmic dynein 1 light intermediate chain 1	Homo sapiens	High	28	2711.3	2780.3	2655.3	2581.8	2639.7	2576.5	2698.9	2620.1	2677.6	2587	2567.7
O43237	DYNC1LI2	Cytoplasmic dynein 1 light intermediate chain 2	Homo sapiens	High	8	371	372.3	379.7	376.5	334.3	383.1	372.2	360	373.1	366.7	358.9
P63167	DYNLL1	Dynein light chain 1, cytoplasmic	Homo sapiens	High	2	752	819.3	821	726	919	668.9	767.8	698.3	785.3	747.5	799.1
Q96FJ2	DYNLL2	Dynein light chain 2, cytoplasmic	Homo sapiens	High	2	198	186	216.8	194.8	231.3	151.3	181.7	144.2	187.4	166	201.5
Q9NP97	DYNLRB1	Dynein light chain roadblock-type 1	Homo sapiens	High	5	304.7	282.5	259.8	295.4	278.2	200.1	226.4	220.4	291.1	247.1	303.6
P63172	DYNLT1	Dynein light chain Tctex-type 1	Homo sapiens	High	4	105.8	115.8	124.4	105.4	121	106.7	113.6	99.4	112.2	115	113.3
Q13627	DYRK1A	Dual specificity tyrosine-phosphorylation-regulated kinase 1A	Homo sapiens	High	21	1318.3	1316.4	1309.8	1318	1511.2	1489.1	1293.9	1315.7	1310.5	1434.2	1335.2
O75923	DYSF	Dysferlin	Homo sapiens	High	9	399.5	356.8	347.5	392.1	428.2	400.2	454.5	439.7	438.8	425.6	401.6
Q86Y13	DZIP3	E3 ubiquitin-protein ligase DZIP3	Homo sapiens	Medium	1	12.5	16.2	15.1	17.9	6.9	7.2	11.2	11.5	11.3	10.7	15.6
O00716	E2F3	Transcription factor E2F3	Homo sapiens	High	7	186.7	160.5	160.7	172.5	158.8	164.6	161	160.8	166.1	146.4	172.8
Q16254	E2F4	Transcription factor E2F4	Homo sapiens	High	3	168	196	193	199	228.4	232	229.9	214.7	177	198.5	199.6
Q15329	E2F5	Transcription factor E2F5	Homo sapiens	High	2	59.2	48.6	54.1	48.6	57.8	62.7	60.9	52.6	53.1	75.4	47.3
O75461	E2F6	Transcription factor E2F6	Homo sapiens	High	5	288.6	280	298.5	266.5	234.5	280.8	261.3	271.9	272.2	261.2	279.5
A0AVK6	E2F8	Transcription factor E2F8	Homo sapiens	Medium	1	14.6	17.5	17	17	11.5	10.3	12.3	16.9	17.9	11.2	18.1
Q66K89	E4F1	Transcription factor E4F1	Homo sapiens	High	3	106.2	93.1	100.2	110.7	88.2	75.4	111.6	101.9	86.4	97.2	108.4
Q96JC9	EAF1	ELL-associated factor 1	Homo sapiens	High	4	300.2	290.5	330	284.5	322.7	272.4	328.6	283	294.5	264.8	303.3
Q56P03	EAPP	E2F-associated phosphoprotein	Homo sapiens	High	6	212.7	195.7	233.4	222.5	202.4	259.3	182.1	209	183.3	178.5	198.6
Q5JPH6	EARS2	Probable glutamate--tRNA ligase, mitochondrial	Homo sapiens	High	15	823.6	838.2	833	822.4	932.5	956.5	827.2	795.1	827.8	787.1	873.1
O00559	EBAG9	Receptor-binding cancer antigen expressed on SiSo cells	Homo sapiens	High	3	128.5	123.9	140.5	132.9	120.6	116.9	136	145	134.3	138.4	145.8
Q99848	EBNA1BP2	Probable rRNA-processing protein EBP2	Homo sapiens	High	20	3469	3303.4	3395	3434.2	2703.5	2953.5	3346	3311.4	3458.8	3987.2	3465.4
Q15125	EBP	3-beta-hydroxysteroid-Delta(8),Delta(7)-isomerase	Homo sapiens	High	2	97.5	87.7	79.1	128.1	116.2	136.5	89.8	98.4	93.4	122.8	91.6
Q9BY08	EBPL	Emopamil-binding protein-like	Homo sapiens	Medium	1	81.9	80.1	83.2	61.6	74.9	88	108.2	66.8	84.6	128.2	69.3
[truncated: 6,267 more rows]
