# Supplementary material for: Antagonism of PP2A is an independent and conserved function of HIV-1 Vif and causes cell cycle arrest
Source: eLife. 2020 Apr 15;9:e53036. doi: 10.7554/eLife.53036 (PMC7920553; doi:10.7554/eLife.53036)
Supplement: Figure 7—source data 1. — Complete dataset (unfiltered) from TMT-based quantitative proteomic experiment illustrated in Figure 7A. For each protein, normalised, unscaled protein abundances, the number of unique peptides used for protein quantitation, and the protein FDR confidence are shown. [file elife-53036-fig7-data1.xlsx]

## Sheet: Proteomic experiment 3
Accession	GeneID	Description	Toxonomy	Protein FDR Confidence: Combined	# Unique Peptides	Mock_1	Mock_2	∆Vpr-Vif WT_1	∆Vpr-Vif WT_2	∆Vpr-Vif WT_3	∆Vpr-∆Vif_1	∆Vpr-∆Vif_1	∆Vpr-∆Vif_1	∆Vpr-Vif AYR_1	∆Vpr-Vif AYR_2	∆Vpr-Vif AYR_3
P04217	A1BG	Alpha-1B-glycoprotein	Homo sapiens	Medium	1	20.8	16.7	25.9	53.3	64.4	27.6	25.8	22.9	47.6	44.6	23
Q9NRG9	AAAS	Aladin	Homo sapiens	High	11	720.9	648.1	827	796.3	702.1	758.5	674.8	712.2	820.9	774.7	734.8
Q86V21	AACS	Acetoacetyl-CoA synthetase	Homo sapiens	High	5	310.5	188.4	220.3	284.3	197.2	228.8	138.4	145.4	341.8	301.7	207.9
Q6PD74	AAGAB	Alpha- and gamma-adaptin-binding protein p34	Homo sapiens	High	3	92.2	204.9	133.9	103.5	128.2	223.9	230.8	236.4	110.7	136.7	215.5
Q2M2I8	AAK1	AP2-associated protein kinase 1	Homo sapiens	High	6	313.7	282.4	256.4	291.2	263.9	324.1	238	259.1	304.8	290.6	328.9
Q13685	AAMP	Angio-associated migratory cell protein	Homo sapiens	High	8	749.9	672.8	654.5	495.3	663	471.3	422.2	429.4	643.4	648.9	448.3
Q9Y312	AAR2	Protein AAR2 homolog	Homo sapiens	High	9	953.9	904.2	958.8	891.5	1000.9	716.4	675	666.8	769.2	770.1	716.4
P49588	AARS	Alanine--tRNA ligase, cytoplasmic	Homo sapiens	High	42	4540	5033.5	4223.6	4270.7	4198.7	4296.7	3704.2	3752.7	4174.9	4720.1	4429.8
Q5JTZ9	AARS2	Alanine--tRNA ligase, mitochondrial	Homo sapiens	High	20	1111.8	973.7	920.3	1153.7	821.4	941.6	771.6	774.3	1201	1323.9	1003.6
Q9BTE6	AARSD1	Alanyl-tRNA editing protein Aarsd1	Homo sapiens	High	13	1011.3	864.3	721.8	899	705.9	650.3	500.8	526.3	1040.9	981.4	617.3
Q9NRN7	AASDHPPT	L-aminoadipate-semialdehyde dehydrogenase-phosphopantetheinyl transferase	Homo sapiens	High	15	1987.7	1830.7	1682.9	1801.5	1641.2	1815.5	1415.6	1531.9	1780.8	1704.6	1719.3
Q9UDR5	AASS	Alpha-aminoadipic semialdehyde synthase, mitochondrial	Homo sapiens	High	8	305.8	274.2	282.6	394.2	289.5	303.2	330.3	330.1	374.8	358.4	302.4
Q9NY61	AATF	Protein AATF	Homo sapiens	High	15	1106.2	862	885.6	970.9	800.5	798.8	647.5	650.9	1101.2	1091.2	801.7
P80404	ABAT	4-aminobutyrate aminotransferase, mitochondrial	Homo sapiens	High	4	89.4	74.7	87.9	85.8	76.8	93.7	84.5	89.5	90.5	72.6	99.3
Q9NRK6	ABCB10	ATP-binding cassette sub-family B member 10, mitochondrial	Homo sapiens	High	19	1294.1	936.4	1032.2	1296.2	972.5	1063.8	890	836.5	1386	1298.5	1096.9
O75027	ABCB7	ATP-binding cassette sub-family B member 7, mitochondrial	Homo sapiens	High	12	585.1	586.5	681.7	689.2	646.9	666.5	838.5	746	634.4	654.9	735.1
Q9NUT2	ABCB8	ATP-binding cassette sub-family B member 8, mitochondrial	Homo sapiens	High	4	193.8	116.6	129.4	191.2	116.5	105	72.7	72.4	206.7	209.4	102.2
P33527	ABCC1	Multidrug resistance-associated protein 1	Homo sapiens	High	15	574.7	477	485.6	450	442.3	594.6	409.3	443.6	497	537	585.5
O15439	ABCC4	Multidrug resistance-associated protein 4	Homo sapiens	High	2	73.5	55.3	51	64.4	44.8	50.9	32	33.9	77.1	54.6	52.1
P28288	ABCD3	ATP-binding cassette sub-family D member 3	Homo sapiens	High	18	1348.2	853.2	1303.6	1044	1210.2	938.4	1116.1	1048.7	1388.4	1036.4	947.5
O14678	ABCD4	ATP-binding cassette sub-family D member 4	Homo sapiens	High	3	22.5	15.8	16.5	25.5	23.4	14	13.2	14.5	23.5	28.1	22.1
P61221	ABCE1	ATP-binding cassette sub-family E member 1	Homo sapiens	High	33	3206.5	3319.2	3297	3157.3	3613.2	3541.2	4521.7	4785.7	2949.1	2978.6	3460.4
Q8NE71	ABCF1	ATP-binding cassette sub-family F member 1	Homo sapiens	High	23	1545.8	1862.4	1586	1582.4	1478	1689.4	1372.6	1423.9	1646.4	1506.4	1617.9
Q9UG63	ABCF2	ATP-binding cassette sub-family F member 2	Homo sapiens	High	19	2881.8	2271.2	2099.3	2469.4	2093.1	1724.7	1618.6	1672.1	2390.9	2177.9	1660.1
Q9NUQ8	ABCF3	ATP-binding cassette sub-family F member 3	Homo sapiens	High	15	1457.2	1236.9	1038.9	1186.2	1075.1	1150.4	765.4	832.7	1413.8	1357.1	1058
Q9NUJ1	ABHD10	Mycophenolic acid acyl-glucuronide esterase, mitochondrial	Homo sapiens	High	10	871.5	848.8	934.2	967.6	877	875.7	939.3	932.5	908.9	960.9	844.6
Q8NFV4	ABHD11	Protein ABHD11	Homo sapiens	High	7	279.9	226	254.1	285	266.7	283.2	260.4	282.4	350.8	290.9	283.2
Q8N2K0	ABHD12	Monoacylglycerol lipase ABHD12	Homo sapiens	High	7	238.8	169.1	219	207.2	190.8	187.2	161.8	172.7	272.9	243.2	163.4
Q7L211	ABHD13	Protein ABHD13	Homo sapiens	High	1	26.6	27	21.2	32.2	20.3	36.8	25.2	25.1	31.5	31.8	34.6
Q96IU4	ABHD14B	Protein ABHD14B	Homo sapiens	High	6	658.9	449.5	525.9	607.5	569.9	440.4	512.5	488.7	637.5	582.3	411
Q6UXT9	ABHD15	Protein ABHD15	Homo sapiens	Medium	1	42.6	19.8	29.9	34.4	27.9	32.2	20	20.6	45.8	39.5	24.6
O95870	ABHD16A	Protein ABHD16A	Homo sapiens	High	11	405	282.7	335.2	333.1	353.8	319.4	302.4	310.9	410.8	376.5	336.6
Q5VST6	ABHD17B	Protein ABHD17B	Homo sapiens	High	4	328.5	174.9	172.1	248.5	141.4	117.9	80.5	83.3	226.6	275.7	115.2
Q6PCB6	ABHD17C	Protein ABHD17C	Homo sapiens	High	1	25.1	25.1	20.9	24.2	18.1	22.1	15.6	13.4	24.6	44.3	27.3
Q8TB40	ABHD4	Protein ABHD4	Homo sapiens	High	1	15.8	19	8.3	13.1	14.5	22.4	48.3	34.8	23.3	14.8	23.1
Q8WTS1	ABHD5	1-acylglycerol-3-phosphate O-acyltransferase ABHD5	Homo sapiens	Medium	1	33.7	25.8	21.9	35.1	21.4	22.5	19.7	14.3	35.9	22.7	20.9
Q9BV23	ABHD6	Monoacylglycerol lipase ABHD6	Homo sapiens	High	1	32.1	31.6	35	33.3	37.4	38.7	27.4	33.1	34	34.4	40.9
Q8IZP0	ABI1	Abl interactor 1	Homo sapiens	High	7	210.1	238.2	254.1	195.3	257.2	278.2	354.3	338.7	194.3	202.1	277.8
Q9NYB9	ABI2	Abl interactor 2	Homo sapiens	High	3	105	67.5	94.7	87.2	79.4	91.3	112.1	130.2	111.2	84.5	99
P42684	ABL2	Abelson tyrosine-protein kinase 2	Homo sapiens	High	2	76.3	80.3	63.6	73.6	61.1	77.3	55.1	50.6	83.6	93.9	74.9
O14639	ABLIM1	Actin-binding LIM protein 1	Homo sapiens	High	3	80.5	42.8	57.4	58.3	47.6	65.9	36.5	35.3	76.1	78.9	67.3
Q12979	ABR	Active breakpoint cluster region-related protein	Homo sapiens	High	3	26.9	43.5	43.6	46.9	40.1	55.2	65	70.4	50.5	31.5	49
Q9P1F3	ABRACL	Costars family protein ABRACL	Homo sapiens	High	4	423.6	522.5	404.6	460.7	439.7	571.2	350	311.5	420.2	382.2	382
Q9ULW3	ABT1	Activator of basal transcription 1	Homo sapiens	High	13	780.7	486.2	522	586.8	499	549.7	431.4	446.1	675.5	763.8	504.2
P09110	ACAA1	3-ketoacyl-CoA thiolase, peroxisomal	Homo sapiens	High	8	440.9	392	430.3	497	420.9	487.8	490.7	514.7	478.8	423.6	481.1
P42765	ACAA2	3-ketoacyl-CoA thiolase, mitochondrial	Homo sapiens	High	10	449.7	447.3	423.2	493.7	435.5	414.9	517.5	419.4	465.2	485	497.9
Q13085	ACACA	Acetyl-CoA carboxylase 1	Homo sapiens	High	73	5667.2	5035.8	4389.4	4984.8	4346.3	5032.8	3920.6	4307.8	5645.3	5414.3	4699
Q6JQN1	ACAD10	Acyl-CoA dehydrogenase family member 10	Homo sapiens	High	6	147.9	93.3	126.5	169.4	103.5	108.6	90	87.8	181.1	160.5	121.5
Q9UKU7	ACAD8	Isobutyryl-CoA dehydrogenase, mitochondrial	Homo sapiens	High	7	306.3	254.5	234.4	316.7	216.6	333	254.9	222.1	332.6	351.3	309.2
Q9H845	ACAD9	Acyl-CoA dehydrogenase family member 9, mitochondrial	Homo sapiens	High	11	638.4	581.3	485.5	643.6	481.6	580.5	474.9	442.1	638.8	628	587.9
P11310	ACADM	Medium-chain specific acyl-CoA dehydrogenase, mitochondrial	Homo sapiens	High	23	2063.2	2134.1	2644.3	2706.2	2675.2	2814.2	3559.1	3509	2410	1970.3	2702.4
P45954	ACADSB	Short/branched chain specific acyl-CoA dehydrogenase, mitochondrial	Homo sapiens	High	6	211.8	195.7	218.1	227.5	197.2	219.6	227.5	246.1	256.6	207.2	232.9
P49748	ACADVL	Very long-chain specific acyl-CoA dehydrogenase, mitochondrial	Homo sapiens	High	29	1975	1949.8	2380.6	2402.5	2245.9	2117.6	2467.7	2319.7	2444.5	2144.5	2252.3
Q15027	ACAP1	Arf-GAP with coiled-coil, ANK repeat and PH domain-containing protein 1	Homo sapiens	High	18	1264.4	944.9	1041.9	1198.3	981.3	1111.3	875.6	954.5	1206.3	1277.6	1132.5
Q15057	ACAP2	Arf-GAP with coiled-coil, ANK repeat and PH domain-containing protein 2	Homo sapiens	High	9	413.3	401.9	377.5	329	388.9	476.9	294.8	305	421.5	421.9	448.1
P24752	ACAT1	Acetyl-CoA acetyltransferase, mitochondrial	Homo sapiens	High	18	1838.8	1881.9	2452.2	2334	2438.1	1721	2203.1	1952.3	2199.1	1768.5	1921.8
Q9BWD1	ACAT2	Acetyl-CoA acetyltransferase, cytosolic	Homo sapiens	High	18	995.9	861.4	973.9	1080.7	1205.1	823.2	838.7	849.7	993.3	1143.4	790
Q9H3P7	ACBD3	Golgi resident protein GCP60	Homo sapiens	High	10	375	379.4	493.9	454.9	501.8	322.1	343.6	355.1	401	423.5	321.1
Q5T8D3	ACBD5	Acyl-CoA-binding domain-containing protein 5	Homo sapiens	High	1	12.1	27	16.2	13.6	22.5	24.4	44.8	39.2	10.4	11.4	34.8
Q9BR61	ACBD6	Acyl-CoA-binding domain-containing protein 6	Homo sapiens	High	3	152.7	115	74.9	100.1	83.8	104.4	83.3	81.1	125.7	138	86.3
Q96AP0	ACD	Adrenocortical dysplasia protein homolog	Homo sapiens	High	1	17.8	12.6	12.2	19.6	10.4	14.2	9.4	8.4	17	21.4	11.8
Q9UKV3	ACIN1	Apoptotic chromatin condensation inducer in the nucleus	Homo sapiens	High	31	2390.7	2452	2473.9	2220.7	2432.5	2480.6	2568	2520.2	2361.7	2593.3	2381.2
P53396	ACLY	ATP-citrate synthase	Homo sapiens	High	56	6209.7	6880.2	7058.7	6686.5	7135.3	7296.9	7107.6	7498.7	6711.1	6876.8	7078.7
P21399	ACO1	Cytoplasmic aconitate hydratase	Homo sapiens	High	26	2093.9	1692.8	1856.5	2178.3	1753.9	1844.1	1539.5	1622.1	2343.3	2291.5	1817
Q99798	ACO2	Aconitate hydratase, mitochondrial	Homo sapiens	High	39	2583.2	2940.6	3506	3083.1	3339.4	3027.9	4503.6	4269.3	3055.5	3103.4	3391.4
Q86TX2	ACOT1	Acyl-coenzyme A thioesterase 1	Homo sapiens	High	1	124.6	100.7	110.2	142.3	85.9	88.2	82.2	66.5	158.3	152.4	118.5
Q9NPJ3	ACOT13	Acyl-coenzyme A thioesterase 13	Homo sapiens	High	4	261	480.1	444	388	455.1	496.6	693	659.2	302.8	363.1	539.5
P49753	ACOT2	Acyl-coenzyme A thioesterase 2, mitochondrial	Homo sapiens	High	1	1651.1	1448.1	1604.1	1862.7	1554.7	1471.8	1654.3	1617.7	1943.9	2010.9	1544.6
O00154	ACOT7	Cytosolic acyl coenzyme A thioester hydrolase	Homo sapiens	High	15	2745	2123.6	1937.3	2336.6	1895.4	2009	1717.2	1703.6	2545.3	2675.4	2067.2
O14734	ACOT8	Acyl-coenzyme A thioesterase 8	Homo sapiens	High	5	169.9	169.2	184.1	184.5	166.2	203.3	221.7	202.9	171	182.7	208.1
Q15067	ACOX1	Peroxisomal acyl-coenzyme A oxidase 1	Homo sapiens	High	17	793.5	743.2	1144.6	1136.4	1019.3	674.8	912.4	850.4	1176.2	1087.8	722.5
O15254	ACOX3	Peroxisomal acyl-coenzyme A oxidase 3	Homo sapiens	High	2	103.7	68.3	80.3	112.1	67.4	71.7	60.1	54.8	131.1	117	70.1
P24666	ACP1	Low molecular weight phosphotyrosine protein phosphatase	Homo sapiens	High	7	367.6	453.9	308	387.9	288.1	410.8	226.4	230.4	385.9	462.1	346.6
P11117	ACP2	Lysosomal acid phosphatase	Homo sapiens	High	2	94.2	49.8	54.7	92.2	51.8	47.6	24.7	24.2	97.8	75.8	37.3
Q96CM8	ACSF2	Acyl-CoA synthetase family member 2, mitochondrial	Homo sapiens	High	5	270.4	215.2	313.5	317	271.7	253.7	300.8	267	322.3	313.4	318.3
Q4G176	ACSF3	Acyl-CoA synthetase family member 3, mitochondrial	Homo sapiens	High	8	350.5	335.8	377.3	389.2	365	411.2	452.2	404.1	460.1	418.9	430
O95573	ACSL3	Long-chain-fatty-acid--CoA ligase 3	Homo sapiens	High	17	1230.9	1173.7	1229.3	1281.2	1086.8	1178.5	1121.3	1066.6	1185.2	1255.6	1100.6
O60488	ACSL4	Long-chain-fatty-acid--CoA ligase 4	Homo sapiens	High	21	1700.7	1934.6	1706.8	1573.1	1777.6	1575.1	1687.7	1673.2	1398.5	1528.9	1642.1
Q9ULC5	ACSL5	Long-chain-fatty-acid--CoA ligase 5	Homo sapiens	High	1	68.9	33.2	44.6	53.4	56.9	31.1	38.3	41.2	45.4	36.9	32.9
Q9UKU0	ACSL6	Long-chain-fatty-acid--CoA ligase 6	Homo sapiens	High	1	166.1	125.1	118.4	175.8	121.4	121.3	77.9	86.5	170.9	187.6	125.3
Q53FZ2	ACSM3	Acyl-coenzyme A synthetase ACSM3, mitochondrial	Homo sapiens	High	2	94.7	60.3	71.5	84.2	62.7	83	55.1	70.6	85.8	63.6	81.2
P0C7M7	ACSM4	Acyl-coenzyme A synthetase ACSM4, mitochondrial	Homo sapiens	Medium	1	148.4	80.2	83.1	102.7	72.3	70.3	73	56.2	144.3	113.2	82.8
Q9NUB1	ACSS1	Acetyl-coenzyme A synthetase 2-like, mitochondrial	Homo sapiens	High	11	419.1	322	385.6	439.4	383.1	373.3	317.8	325.7	426.1	479	395.7
P60709	ACTB	Actin, cytoplasmic 1	Homo sapiens	High	13	12971.8	13709.5	13718.7	13085.4	14583.8	14977	12873.7	12183.9	13717	13739.3	15352.8
Q562R1	ACTBL2	Beta-actin-like protein 2	Homo sapiens	High	1	4	11.2	11.2	3.4	8.7	190.6	37.1	35.8	1.2	2.5	148.7
P68032	ACTC1	Actin, alpha cardiac muscle 1	Homo sapiens	High	3	1525.9	2814.3	2116.7	1878.9	2531.2	3367.7	2615.6	2689.5	1702.5	1775.7	3258.1
O96019	ACTL6A	Actin-like protein 6A	Homo sapiens	High	9	821.8	867.3	842.1	842.5	832.7	774.6	927.5	929.2	860.7	925.1	848.9
O94805	ACTL6B	Actin-like protein 6B	Homo sapiens	High	1	66.9	120.2	71.1	67.7	59	155.3	79.9	76.1	68	71.8	162.4
P12814	ACTN1	Alpha-actinin-1	Homo sapiens	High	29	2643.9	2890.1	2737.7	2844.9	2612.8	2721.9	2682.7	2776	2997.6	2899.5	2840.1
H7C144	ACTN4	Alpha-actinin-4 (Fragment)	Homo sapiens	High	1	20.4	19.8	16.1	18.8	9.6	23.1	16.2	10.1	27.9	22.8	19.8
O43707	ACTN4	Alpha-actinin-4	Homo sapiens	High	37	7792.2	8192.2	9198.5	8192.5	8892.1	7546.3	7266.4	7821.9	8627.6	9055	7371.8
Q9NZ32	ACTR10	Actin-related protein 10	Homo sapiens	High	7	462.1	367.3	356.5	386.5	343.5	488.6	312.7	346.3	484.7	392.2	418.8
P61163	ACTR1A	Alpha-centractin	Homo sapiens	High	6	1261.7	1380.4	1469.7	1390.6	1461.3	1340.6	1460.4	1441.8	1323.7	1350	1484.7
P42025	ACTR1B	Beta-centractin	Homo sapiens	High	2	33	51.5	37.4	38.2	31.7	48.8	30	32.3	43.9	43.4	47.3
P61160	ACTR2	Actin-related protein 2	Homo sapiens	High	14	1910.5	1659.8	1794.1	1881.2	1821.1	2045.5	1707.7	1849	1902.7	1860.9	2012.3
P61158	ACTR3	Actin-related protein 3	Homo sapiens	High	21	2240.3	2262.3	2131.2	2258	2096.7	2203.6	1705.3	1701.4	2399.7	2474	2172
Q9H9F9	ACTR5	Actin-related protein 5	Homo sapiens	High	7	379.7	240.3	257.6	291.7	215.5	185.4	160.1	186.4	359.3	307.6	190.7
Q9GZN1	ACTR6	Actin-related protein 6	Homo sapiens	High	4	107	93.6	81.1	74.1	70.6	73.6	46.8	52	107.4	109.2	82.6
Q9H981	ACTR8	Actin-related protein 8	Homo sapiens	High	4	276.6	851.7	187.7	208	175.9	2177.5	600.7	1366	468.3	413	1959.7
Q03154	ACY1	Aminoacylase-1	Homo sapiens	High	9	434.8	271.1	321.2	293.4	274.7	281.2	219.3	251.5	431.1	428	304.2
P07311	ACYP1	Acylphosphatase-1	Homo sapiens	High	3	124.4	177.1	174.9	158.3	175.1	245.6	177.9	164.3	175.1	169.1	219.4
P00813	ADA	Adenosine deaminase	Homo sapiens	High	15	1609.9	1606.2	1441.2	1369.2	1408.3	1467.9	1255.8	1297.7	1386.8	1371.4	1491.2
Q6DHV7	ADAL	Adenosine deaminase-like protein	Homo sapiens	High	1	24.8	20	27.8	24.4	24.7	31.1	27.6	26.2	23.4	24.9	31.4
O14672	ADAM10	Disintegrin and metalloproteinase domain-containing protein 10	Homo sapiens	High	4	200.8	162.3	140.4	191.3	141.4	136.5	92.4	89	191.5	226.9	133.1
P78536	ADAM17	Disintegrin and metalloproteinase domain-containing protein 17	Homo sapiens	High	6	230.1	151.1	148.9	198.8	146.7	167.3	120.4	115.1	212.3	251.2	144.6
Q9P0K1	ADAM22	Disintegrin and metalloproteinase domain-containing protein 22	Homo sapiens	High	1	31.7	26.6	20	27.2	16.7	24.1	15.7	11	28.5	26.9	23
P55265	ADAR	Double-stranded RNA-specific adenosine deaminase	Homo sapiens	High	44	4989.6	4464.9	4916.6	4596.1	4884.4	4429.1	4441.9	4418.6	4707.1	4557.6	4358.3
Q9BUB4	ADAT1	tRNA-specific adenosine deaminase 1	Homo sapiens	High	2	26.9	20.9	22.3	23.7	17.1	23.4	17.1	16	24	26.9	10.9
O60266	ADCY3	Adenylate cyclase type 3	Homo sapiens	High	2	18.1	18.3	16	21.3	16.1	20.3	13.1	16.8	18.8	21.8	19.6
P41586	ADCYAP1R1	Pituitary adenylate cyclase-activating polypeptide type I receptor	Homo sapiens	Medium	1	28.8	31.9	52.7	48.8	46	48.3	48.8	54.7	46	39.5	50.9
P35611	ADD1	Alpha-adducin	Homo sapiens	High	6	418.4	272.8	281.6	364	289.7	247.7	212.4	200	359.1	357.8	305.7
Q9UEY8	ADD3	Gamma-adducin	Homo sapiens	High	4	196.3	246	208.2	223.2	190.5	270.3	194.7	175.5	251.1	252.1	235.4
O60241	ADGRB2	Adhesion G protein-coupled receptor B2	Homo sapiens	Medium	1	54.4	32.9	28.9	37	44.8	44.2	33.2	40.2	38.9	56.3	43.5
P11766	ADH5	Alcohol dehydrogenase class-3	Homo sapiens	High	12	1612.1	2223	2188.3	1906.1	2356.8	2760	2866.2	3022.3	1638.6	1696.6	2597.8
P40394	ADH7	Alcohol dehydrogenase class 4 mu/sigma chain	Homo sapiens	High	1	118.4	77.2	38.1	69.2	36.8	102.5	57	68.5	87.5	68.1	107.3
Q9BV57	ADI1	1,2-dihydroxy-3-keto-5-methylthiopentene dioxygenase	Homo sapiens	High	7	757.1	512	497.2	647.6	466.4	433.1	419.7	428.2	698.8	694.2	405.5
P55263	ADK	Adenosine kinase	Homo sapiens	High	19	1589.7	1979.8	1732.4	1552.2	1760.4	2109.6	1653.7	1822.8	1463.2	1561.3	1990.1
Q9H2P0	ADNP	Activity-dependent neuroprotector homeobox protein	Homo sapiens	High	16	1217.3	934.4	1177.8	1089.9	1045.3	702.3	953.9	1014.3	1131.2	1050.2	753.9
Q6IQ32	ADNP2	ADNP homeobox protein 2	Homo sapiens	High	1	34.5	43	47.2	40	46.6	48.4	58.1	50.5	30.9	26.2	77.3
Q96SZ5	ADO	2-aminoethanethiol dioxygenase	Homo sapiens	High	3	203	242.3	222.6	224.9	243.7	308.3	276.6	269	222	225.1	287.4
Q9BRR6	ADPGK	ADP-dependent glucokinase	Homo sapiens	High	3	96.7	71.3	83.8	87.5	81.2	67.7	95.1	81.4	98.2	99.2	67.1
Q9NX46	ADPRHL2	Poly(ADP-ribose) glycohydrolase ARH3	Homo sapiens	High	7	397.7	352.1	280.7	399.2	265.3	341.7	224.9	214.3	438.9	428.9	360.5
Q16186	ADRM1	Proteasomal ubiquitin receptor ADRM1	Homo sapiens	High	4	152.3	334.9	196.2	182.2	227	255.2	232.7	228.3	124.6	155.2	254.9
P30566	ADSL	Adenylosuccinate lyase	Homo sapiens	High	14	1089	1414.4	1149.4	1176.5	1216.3	1060.1	1057.3	1027.4	1071.9	1161.9	1180.1
P30520	ADSS	Adenylosuccinate synthetase isozyme 2	Homo sapiens	High	23	2796.4	3641.5	2805.3	2610.1	3006.6	3261.8	2918.4	2927.1	2559.8	2835.4	3245.7
Q8IUX7	AEBP1	Adipocyte enhancer-binding protein 1	Homo sapiens	High	1	20.5	17	17.3	19.9	20.4	17.9	10.3	9.7	27.3	19.9	17
Q6ZN18	AEBP2	Zinc finger protein AEBP2	Homo sapiens	High	2	230.3	140.4	121.1	163.5	132.2	100.2	80.9	85.1	200	183.8	100.6
Q08117	AES	Amino-terminal enhancer of split	Homo sapiens	High	1	19.5	9	17.2	23.4	12.5	23.4	13.5	17.1	26.5	17.6	18.4
P51825	AFF1	AF4/FMR2 family member 1	Homo sapiens	High	2	34	32.2	18.4	24.5	18	49	18.2	19.1	32.2	25.4	38.7
Q9UHB7	AFF4	AF4/FMR2 family member 4	Homo sapiens	High	1	58.4	61.9	64.4	80.5	61.9	93.2	56.5	56.2	87.6	82.4	70.1
Q9Y4W6	AFG3L2	AFG3-like protein 2	Homo sapiens	High	29	2009.7	1975.2	2226.4	2079.8	2085.3	2149	2298.1	2259	1982.6	1941.3	2239.6
Q6ULP2	AFTPH	Aftiphilin	Homo sapiens	High	4	104.3	132.5	102.3	103.8	109.8	103.2	86.4	84.2	113.2	146.9	127.1
P20933	AGA	N(4)-(beta-N-acetylglucosaminyl)-L-asparaginase	Homo sapiens	High	1	214.9	92.9	125.5	209.7	113.6	80.8	47.8	54.1	213.5	186.9	65.1
Q99490-2	AGAP2	Isoform 2 of Arf-GAP with GTPase, ANK repeat and PH domain-containing protein 2	Homo sapiens	High	1	24.5	53.5	25.1	25.9	21.6	34.8	24.6	20.6	39.9	34.9	41.3
Q99490	AGAP2	Arf-GAP with GTPase, ANK repeat and PH domain-containing protein 2	Homo sapiens	High	9	474.6	441.1	434.9	536.1	371.5	592.9	364.5	372.2	550.2	531.3	535.8
P52594	AGFG1	Arf-GAP domain and FG repeat-containing protein 1	Homo sapiens	High	5	287.2	358.7	388.9	339.1	403	354.4	366.1	418.1	329.8	368.4	322.6
O95081	AGFG2	Arf-GAP domain and FG repeat-containing protein 2	Homo sapiens	Medium	1	29.7	22.2	21.5	29.3	20.7	25.9	19.3	17.6	31.8	33.5	20.9
Q53H12	AGK	Acylglycerol kinase, mitochondrial	Homo sapiens	High	12	921.7	681.4	1158	1104.4	1025.6	587.5	782.2	737.7	987.8	945.1	553.8
P35573	AGL	Glycogen debranching enzyme	Homo sapiens	High	40	3148.6	2812.3	2316.2	2626.9	2360	2630.3	1964.1	2035.7	2839.3	2937.3	2505.5
Q9BSE5	AGMAT	Agmatinase, mitochondrial	Homo sapiens	High	2	16	15	9.1	12.1	14.5	22.1	22	20.6	15.9	10.2	24.1
Q9UKV8	AGO2	Protein argonaute-2	Homo sapiens	High	7	825.3	688.4	586	701.7	622.2	652.6	580.9	645	763.3	770.8	678
Q99943	AGPAT1	1-acyl-sn-glycerol-3-phosphate acyltransferase alpha	Homo sapiens	High	3	73.4	67.2	59.9	69.1	67.4	75.3	64.4	48.4	67.4	63.7	98.5
O15120	AGPAT2	1-acyl-sn-glycerol-3-phosphate acyltransferase beta	Homo sapiens	High	2	126.2	73.6	91.4	131.8	93	72.6	53.8	56.7	145.3	139	66.5
Q9NRZ7	AGPAT3	1-acyl-sn-glycerol-3-phosphate acyltransferase gamma	Homo sapiens	High	4	103.2	94.1	115.3	114.1	94.8	138.2	127.5	119	99.9	95.2	149.2
Q9NUQ2	AGPAT5	1-acyl-sn-glycerol-3-phosphate acyltransferase epsilon	Homo sapiens	High	8	821.8	534.2	598.7	799.3	539	504.1	442	419.9	848.1	829	510.5
O00116	AGPS	Alkyldihydroxyacetonephosphate synthase, peroxisomal	Homo sapiens	High	24	1657.8	1504.7	2044.7	1884.8	2043.2	1630.1	2476.1	2327	1826	1843.8	1773.2
Q8WYP5	AHCTF1	Protein ELYS	Homo sapiens	High	33	1534.7	1463.2	1538.9	1441.2	1362.3	1383.3	1306.6	1304.7	1470.7	1518.1	1401.9
P23526	AHCY	Adenosylhomocysteinase	Homo sapiens	High	23	4659.3	4521.7	4601.3	4463.4	5685.5	4974.7	5402.6	5790.8	4015.7	4167.7	4774
O43865	AHCYL1	Adenosylhomocysteinase 2	Homo sapiens	High	10	1575.2	1645.1	1183.3	1318.1	1229.5	1326.2	1230.1	1255.2	1479.9	1512.1	1281.1
O95433	AHSA1	Activator of 90 kDa heat shock protein ATPase homolog 1	Homo sapiens	High	22	2162.2	2608.4	2111.5	1681.4	2357.8	2412.2	2281.5	2303	1867.8	2083	2253.8
P02765	AHSG	Alpha-2-HS-glycoprotein	Homo sapiens	High	3	23.5	76.9	177.7	140	421.8	72.6	300.1	192.4	105.9	127.9	115.2
Q96BJ3	AIDA	Axin interactor, dorsalization-associated protein	Homo sapiens	High	2	64.8	66.7	50	58.6	55.3	81.5	39.5	42	51.2	56.2	75.9
O95831	AIFM1	Apoptosis-inducing factor 1, mitochondrial	Homo sapiens	High	17	1756.9	2039.6	2066.6	2259.3	1998.6	2094.5	2552.6	2379.1	2065.5	2115.5	2333.4
Q9Y4K1	AIM1	Absent in melanoma 1 protein	Homo sapiens	High	20	1429.6	1528.6	1670.3	1489.5	1787.9	1605.2	1714.7	1720.7	1408.6	1418.8	1482.7
Q12904	AIMP1	Aminoacyl tRNA synthase complex-interacting multifunctional protein 1	Homo sapiens	High	15	874.6	919.4	842.6	928.9	843.1	792.6	697.9	687.3	927.8	737.9	687.4
F8W950	AIMP2	Aminoacyl tRNA synthase complex-interacting multifunctional protein 2	Homo sapiens	High	2	115.4	79	44.3	76.7	41.9	56.5	38.7	48.4	62.8	83	85.4
Q13155	AIMP2	Aminoacyl tRNA synthase complex-interacting multifunctional protein 2	Homo sapiens	High	13	1028.7	1350.7	925	1015.2	930.9	1140.4	972.5	965.5	886.7	1015.8	1189.3
O00170	AIP	AH receptor-interacting protein	Homo sapiens	High	18	1799.4	2336.8	1904.6	1758.2	2174.4	2189.4	1963.7	2026.4	1637.9	1881.2	2020
P54819	AK2	Adenylate kinase 2, mitochondrial	Homo sapiens	High	15	1454	1267.4	1375.4	1544.5	1322.9	1409.9	1356.9	1304.9	1449.2	1282.6	1458.5
Q9UIJ7	AK3	GTP:AMP phosphotransferase AK3, mitochondrial	Homo sapiens	High	5	280.2	249.8	482.5	417.8	507.6	390	822.6	872.8	327	315.6	428.7
Q9Y3D8	AK6	Adenylate kinase isoenzyme 6	Homo sapiens	High	6	334.3	453.7	322.1	393.8	293.5	391.7	289.4	301.6	381.5	389.1	328.4
Q92667	AKAP1	A-kinase anchor protein 1, mitochondrial	Homo sapiens	High	10	478.4	544.5	402.2	493.7	390.4	605.6	468.2	477.7	454	445.9	582.2
O43572	AKAP10	A-kinase anchor protein 10, mitochondrial	Homo sapiens	High	3	187.6	124.2	145.3	234.4	117	117.1	65.4	63.6	235.4	220.5	120.1
Q9UKA4	AKAP11	A-kinase anchor protein 11	Homo sapiens	High	2	149.2	138.3	114.8	124	100.6	126.9	92.8	80.7	174.9	168.1	139.3
Q12802	AKAP13	A-kinase anchor protein 13	Homo sapiens	Medium	1	29	18.2	19.4	19.9	21.1	31.4	20.2	17	21.2	19.6	20
Q02040	AKAP17A	A-kinase anchor protein 17A	Homo sapiens	High	3	175	134.2	144.5	169.7	133.9	146	118.6	131.6	166.3	155	145.6
Q9Y2D5	AKAP2	A-kinase anchor protein 2	Homo sapiens	High	7	320.6	333.2	260	222.2	292.4	328.4	412.1	426	302.3	297.9	309.6
O43823	AKAP8	A-kinase anchor protein 8	Homo sapiens	High	6	855.7	716.5	832.5	809.1	841.5	619.9	563.6	574.3	752.7	764.6	634.5
Q9ULX6	AKAP8L	A-kinase anchor protein 8-like	Homo sapiens	High	5	568.6	429.1	692.5	665.2	695.1	582.1	608.3	634.9	567.3	354.4	479.5
Q99996	AKAP9	A-kinase anchor protein 9	Homo sapiens	High	9	252.9	314.4	261.6	273	239.9	373.4	269.3	278	291	277.6	347.2
Q7Z591	AKNA	AT-hook-containing transcription factor	Homo sapiens	High	4	314.8	307.3	328.3	299.5	317.9	325.1	395.2	450.6	285.3	303.4	324.8
P14550	AKR1A1	Alcohol dehydrogenase [NADP(+)]	Homo sapiens	High	15	1443.8	1321.9	1586.5	1480.5	1593.9	1618.2	1338	1516.8	1521.9	1517.7	1549.1
P15121	AKR1B1	Aldose reductase	Homo sapiens	High	11	1014.4	1017.5	1033.9	1033.9	1106.9	1220.3	1103.4	1206.5	842.1	1111	1124.9
P42330	AKR1C3	Aldo-keto reductase family 1 member C3	Homo sapiens	High	14	1178.3	1159.6	1072.7	1144.7	1055.8	1197.1	927	937.8	1066.2	1155.2	1146.9
O43488	AKR7A2	Aflatoxin B1 aldehyde reductase member 2	Homo sapiens	High	8	713.6	599.7	631.1	755.4	555.8	613.7	560.4	526.2	831.6	771	676.8
P31749	AKT1	RAC-alpha serine/threonine-protein kinase	Homo sapiens	High	6	322.8	410.6	364.6	394.1	373.8	486.6	527.6	573.3	346.9	313.5	506.8
Q96B36	AKT1S1	Proline-rich AKT1 substrate 1	Homo sapiens	High	2	66.7	72.1	59.1	62.7	58.7	72.5	71.3	68.2	60.4	67.3	76
P31751	AKT2	RAC-beta serine/threonine-protein kinase	Homo sapiens	High	5	497.3	434.9	384.2	462.4	381.2	381.9	337.4	357.1	460.7	402.8	345.6
P13716	ALAD	Delta-aminolevulinic acid dehydratase	Homo sapiens	High	6	327.2	250.1	309.1	326.3	233.3	253.7	158.1	152.8	319.8	308.9	242.7
P13196	ALAS1	5-aminolevulinate synthase, nonspecific, mitochondrial	Homo sapiens	High	1	39.8	18.9	34	49.7	37.7	33.9	18.6	13.2	54.5	35.7	37.4
Q13740	ALCAM	CD166 antigen	Homo sapiens	High	6	367.7	351.2	382.7	309	361.9	386.1	458.3	468.6	269.8	293.4	389.1
Q8IZ83	ALDH16A1	Aldehyde dehydrogenase family 16 member A1	Homo sapiens	High	11	484.5	433.2	446.8	514.5	404.8	410.7	270.5	270.1	557.6	651.8	380.2
P54886	ALDH18A1	Delta-1-pyrroline-5-carboxylate synthase	Homo sapiens	High	33	3908.3	3241.8	3218.8	3814.9	3173.4	2854.9	2441.6	2380.3	3964.6	3649.5	2748.7
O94788	ALDH1A2	Retinal dehydrogenase 2	Homo sapiens	High	8	178.6	190.2	193.6	183.6	194.3	224.5	139.6	151.1	226.1	221.2	220.8
P30837	ALDH1B1	Aldehyde dehydrogenase X, mitochondrial	Homo sapiens	High	14	854.3	764.1	984	982.5	956	802.9	920	923.2	832.6	798.5	822.1
P05091	ALDH2	Aldehyde dehydrogenase, mitochondrial	Homo sapiens	High	1	31.8	10.2	22	28.7	20.5	16.7	15.5	16.3	34.5	27.5	22.2
P30038	ALDH4A1	Delta-1-pyrroline-5-carboxylate dehydrogenase, mitochondrial	Homo sapiens	High	8	265.3	272.3	306.8	313.4	291.9	333.8	372.6	372.9	270.9	265.3	342.8
P51649	ALDH5A1	Succinate-semialdehyde dehydrogenase, mitochondrial	Homo sapiens	High	10	837.6	695.9	1022.1	895.6	1070.5	701.5	903.6	855.6	840.8	742.8	735.9
Q02252	ALDH6A1	Methylmalonate-semialdehyde dehydrogenase [acylating], mitochondrial	Homo sapiens	High	16	702.4	730.5	921.2	943.7	905.3	823.7	1015.1	922	913.9	950.1	949.8
P49189	ALDH9A1	4-trimethylaminobutyraldehyde dehydrogenase	Homo sapiens	High	14	933.2	1206.6	1086.8	1179.2	1113.4	1222.8	1126.8	1125.9	1127.9	1091.9	1206.8
P04075	ALDOA	Fructose-bisphosphate aldolase A	Homo sapiens	High	31	5751.3	6112.3	5977.8	5614.3	6553.3	6465.6	6043.7	5899.2	5806.9	6094.1	6030.8
P09972	ALDOC	Fructose-bisphosphate aldolase C	Homo sapiens	High	25	2039.1	1930.3	2584.3	2524.4	2604.1	2299.7	2284.7	2110.5	2937.8	3150.7	2459.4
Q9BT22	ALG1	Chitobiosyldiphosphodolichol beta-mannosyltransferase	Homo sapiens	High	4	351.4	263.2	284.9	311.9	231.1	359.7	245.6	255.8	356.7	312.3	332.6
Q5BKT4	ALG10	Dol-P-Glc:Glc(2)Man(9)GlcNAc(2)-PP-Dol alpha-1,2-glucosyltransferase	Homo sapiens	High	3	102.3	134	132.1	114.1	110.3	181.9	185.6	168.4	106.8	134.1	192.4
Q2TAA5	ALG11	GDP-Man:Man(3)GlcNAc(2)-PP-Dol alpha-1,2-mannosyltransferase	Homo sapiens	High	4	109.1	92.5	94.1	112.1	68.5	120.3	106.5	103.5	103.4	74.3	127.2
Q9H553	ALG2	Alpha-1,3/1,6-mannosyltransferase ALG2	Homo sapiens	High	8	295	301.2	288.5	301.8	268.9	375.2	319.7	309.5	325.6	312.8	376.3
Q92685	ALG3	Dol-P-Man:Man(5)GlcNAc(2)-PP-Dol alpha-1,3-mannosyltransferase	Homo sapiens	High	1	20.4	35.7	18.2	22	19.5	41.7	17.6	22.8	20.2	18.4	37.2
Q9Y673	ALG5	Dolichyl-phosphate beta-glucosyltransferase	Homo sapiens	High	6	593.1	539.4	647.3	657.9	604.6	590.7	619.6	587.2	633.4	542.5	608
Q9Y672	ALG6	Dolichyl pyrophosphate Man9GlcNAc2 alpha-1,3-glucosyltransferase	Homo sapiens	High	2	139.4	71.4	116.4	124.7	84	63.7	46.2	41.7	164	137	64
Q9BVK2	ALG8	Probable dolichyl pyrophosphate Glc1Man9GlcNAc2 alpha-1,3-glucosyltransferase	Homo sapiens	High	4	413.4	317.7	351.6	377	316.4	343.3	250.5	239.4	405.4	350.5	347.6
Q9H6U8	ALG9	Alpha-1,2-mannosyltransferase ALG9	Homo sapiens	High	3	176.8	99.2	140.8	150.1	118.3	125.7	94.9	99.4	181	148.4	134.9
Q13686	ALKBH1	DNA demethylase ALKBH1	Homo sapiens	High	2	89.7	59.6	59.6	68.5	57.1	44.2	35	34.8	87.7	85.2	42.8
Q96Q83	ALKBH3	Alpha-ketoglutarate-dependent dioxygenase alkB homolog 3	Homo sapiens	High	5	41.1	41.9	28.6	36.4	26.5	50	23.4	25.8	31.1	39.8	38.7
Q9NXW9	ALKBH4	Alpha-ketoglutarate-dependent dioxygenase alkB homolog 4	Homo sapiens	High	4	139.5	123.6	99.9	128	103.5	118.2	65.3	69.7	146	192.4	98.4
Q6P6C2	ALKBH5	RNA demethylase ALKBH5	Homo sapiens	High	7	293.9	222.4	222	284.2	233	201.8	177.2	191.4	299.5	298.2	230.2
Q3KRA9	ALKBH6	Alpha-ketoglutarate-dependent dioxygenase alkB homolog 6	Homo sapiens	Medium	1	15.1	11.9	13	14.7	17.6	23.2	31.8	32.2	17.4	13.2	34.1
Q9BT30	ALKBH7	Alpha-ketoglutarate-dependent dioxygenase alkB homolog 7, mitochondrial	Homo sapiens	High	3	85	55.2	49.2	80.9	47.4	23.7	21.3	17.4	64.6	71.7	21.2
Q96BT7	ALKBH8	Alkylated DNA repair protein alkB homolog 8	Homo sapiens	High	1	37.5	38.3	20.6	28.8	24	41.1	18	26.5	34.1	30	42.4
P20292	ALOX5AP	Arachidonate 5-lipoxygenase-activating protein	Homo sapiens	High	2	129.2	85.1	119.3	145	110	110.7	83	86	167.2	145.2	108.2
Q96Q42	ALS2	Alsin	Homo sapiens	Medium	1	36.8	47.1	34.3	38.2	27	52.9	38.2	34.7	42.2	32.2	48.8
Q86V81	ALYREF	THO complex subunit 4	Homo sapiens	High	8	1686.7	1347.3	1532.6	1676.5	1477.4	1381.5	1233.6	1127.8	1796.2	1331.9	1275.8
Q9C0C7	AMBRA1	Activating molecule in BECN1-regulated autophagy protein 1	Homo sapiens	High	7	138.4	86.1	90.8	111.6	86.3	81.2	57.9	57.7	133.7	113.3	83.8
P17707	AMD1	S-adenosylmethionine decarboxylase proenzyme	Homo sapiens	High	1	26.5	15	17.3	20.9	17.4	24.3	18.3	21.2	23	24.7	15.3
Q9Y303	AMDHD2	N-acetylglucosamine-6-phosphate deacetylase	Homo sapiens	High	5	341.9	193	229.7	308.4	216.5	205.8	145.3	142.9	356.6	332.6	205.5
Q8N944	AMER3	APC membrane recruitment protein 3	Homo sapiens	Medium	1	88.4	66.2	23.5	79.8	47	13.4	6.1	5.2	49.7	97	16.4
Q9UKV5	AMFR	E3 ubiquitin-protein ligase AMFR	Homo sapiens	High	4	66.5	56.7	60.7	76.7	60.6	71.9	54.2	50.4	93.5	84.8	62
Q9Y4X0	AMMECR1	AMME syndrome candidate gene 1 protein	Homo sapiens	High	4	255.5	198.3	213.2	250.3	179.3	176.8	137	133.1	255.9	271.3	177.3
Q01433	AMPD2	AMP deaminase 2	Homo sapiens	High	20	1859.3	1651.8	1703.3	1926	1576.4	1548.4	1359.5	1410.1	2090.7	1889.6	1527.1
Q86W34	AMZ2	Archaemetzincin-2	Homo sapiens	High	2	28.9	33.6	32.8	33.4	26.1	45.3	36.1	32.1	23.9	34.8	39.4
Q9H1A4	ANAPC1	Anaphase-promoting complex subunit 1	Homo sapiens	High	18	1038.3	1009.3	987.3	890.9	986	1142.7	1388.4	1346.3	1028.3	939.4	1115.9
Q9UM13	ANAPC10	Anaphase-promoting complex subunit 10	Homo sapiens	High	2	76.9	105.4	72.5	71.5	84	101.5	100	96.3	74	72.9	115.7
Q9UJX6	ANAPC2	Anaphase-promoting complex subunit 2	Homo sapiens	High	6	379.4	263.7	251.3	296.6	237.9	215.2	121.5	117.1	380.5	281.8	194.5
Q9UJX5	ANAPC4	Anaphase-promoting complex subunit 4	Homo sapiens	High	6	127	99.5	98.4	110.4	89.2	110.3	85	83.1	114.5	102.3	97.7
Q9UJX4	ANAPC5	Anaphase-promoting complex subunit 5	Homo sapiens	High	13	628.9	482.5	393.8	445.7	389	449.7	285.3	298.5	501.1	439.9	403
Q9UJX3	ANAPC7	Anaphase-promoting complex subunit 7	Homo sapiens	High	16	1228.7	1009.3	1095.9	1278.5	996.7	988.3	870.1	864.3	1358.1	1316.7	930.1
Q9P2R3	ANKFY1	Rabankyrin-5	Homo sapiens	High	12	678.6	566.6	530.9	657.1	490.9	609.2	489.4	470	723.2	628	575.9
Q8IWZ3	ANKHD1	Ankyrin repeat and KH domain-containing protein 1	Homo sapiens	High	9	964.4	1157.3	901.6	1016.1	846.6	1178.9	770.3	814.5	1121.8	1069.1	1184.1
Q86XL3	ANKLE2	Ankyrin repeat and LEM domain-containing protein 2	Homo sapiens	High	14	586.1	452.2	521.6	457.5	468.9	391.1	336.7	338.2	614.3	599	377
Q8IV38	ANKMY2	Ankyrin repeat and MYND domain-containing protein 2	Homo sapiens	High	6	206.4	222.1	192.4	207.7	179.3	218.6	164.9	177.6	203.1	226.1	226.9
Q6UB99	ANKRD11	Ankyrin repeat domain-containing protein 11	Homo sapiens	High	3	194.3	146.9	120.4	163.8	138.6	173.5	135.3	136.7	170	134.7	173
Q8IZ07	ANKRD13A	Ankyrin repeat domain-containing protein 13A	Homo sapiens	High	4	130.6	83.6	85	122.3	82.5	118.8	83.2	79.5	129	109.1	114.5
Q6ZTN6-3	ANKRD13D	Isoform 3 of Ankyrin repeat domain-containing protein 13D	Homo sapiens	Medium	1	18	11.8	12.1	17	13.7	20.8	7.9	8.9	23	17.9	16.2
O75179	ANKRD17	Ankyrin repeat domain-containing protein 17	Homo sapiens	High	7	339.4	441.2	320.3	363.8	337	380.6	485.1	487.1	346.4	332.6	385.6
Q96NW4	ANKRD27	Ankyrin repeat domain-containing protein 27	Homo sapiens	High	2	105.2	105.2	81.5	111.6	87.2	147.3	60.3	60	121	113.4	124.9
O15084	ANKRD28	Serine/threonine-protein phosphatase 6 regulatory ankyrin repeat subunit A	Homo sapiens	High	10	471.5	386.9	368.7	391.4	325.6	421.3	316	339.8	421.7	398	375.8
Q53RE8	ANKRD39	Ankyrin repeat domain-containing protein 39	Homo sapiens	Medium	1	27.2	11.4	12.3	17.7	12.6	11.7	11.5	12.9	18	15.8	10.9
Q86W74	ANKRD46	Ankyrin repeat domain-containing protein 46	Homo sapiens	High	1	12.7	29.9	13.2	13.8	11.7	15.7	10.8	9	12.1	13.6	17.1
Q9ULJ7	ANKRD50	Ankyrin repeat domain-containing protein 50	Homo sapiens	High	5	201	176.3	133	138.1	121.9	214.4	124	148.1	176.8	173.6	180.9
Q8NB46	ANKRD52	Serine/threonine-protein phosphatase 6 regulatory ankyrin repeat subunit C	Homo sapiens	High	7	213.6	213.4	162.2	213.3	162.7	303.7	132.8	148.1	239.8	200.5	278.7
Q92625	ANKS1A	Ankyrin repeat and SAM domain-containing protein 1A	Homo sapiens	High	11	256	260.2	249.4	251.9	239.3	299.2	217.1	250.2	270.8	278.8	273.6
Q9H8Y5	ANKZF1	Ankyrin repeat and zinc finger domain-containing protein 1	Homo sapiens	High	13	507	461.7	533.3	581.6	476.7	542.5	514.8	518.6	706.6	681.6	536.3
Q9NQW6	ANLN	Anillin	Homo sapiens	High	5	199.9	165.8	172.5	267.6	176.5	164.4	110.3	98.2	204.9	203.5	140.3
Q4KMQ2	ANO6	Anoctamin-6	Homo sapiens	High	5	95.7	104.2	99.3	77.7	74.8	127.7	132.2	131.4	87.2	98.5	126.8
P39687	ANP32A	Acidic leucine-rich nuclear phosphoprotein 32 family member A	Homo sapiens	High	11	1740.7	1815.9	1654.3	1142.6	2074	2137.8	2390.4	2480.6	1615.2	1633.1	2069.9
Q92688	ANP32B	Acidic leucine-rich nuclear phosphoprotein 32 family member B	Homo sapiens	High	5	1236	1658	1327	1412.2	1692	1799.9	1846.3	1582.7	1106.1	1240.4	1730.1
Q9BTT0	ANP32E	Acidic leucine-rich nuclear phosphoprotein 32 family member E	Homo sapiens	High	10	1088.2	1222.3	1117.2	1172.2	1196.2	1235.5	1219.4	1185.6	1136.3	1136.2	1214.7
P58335	ANTXR2	Anthrax toxin receptor 2	Homo sapiens	High	4	97.7	95.6	119	107.8	144.4	163.7	190.4	182.1	85.3	108.9	163.6
P04083	ANXA1	Annexin A1	Homo sapiens	High	26	2886.2	4047.3	3272.6	3393.1	3977.3	3865.7	3752.8	3657.2	2767.5	3387.5	4067.1
P50995	ANXA11	Annexin A11	Homo sapiens	High	16	1317.3	1302.9	1468.2	1452	1462	1356.2	1245.6	1277.4	1497.2	1453.8	1308.6
P07355	ANXA2	Annexin A2	Homo sapiens	High	33	5253.4	5486.4	5422.8	6027.7	5513.4	4861.9	5317	4950.3	5082.2	5410	5188.6
P12429	ANXA3	Annexin A3	Homo sapiens	High	13	613.5	534.7	694.8	725	602.7	634	585.9	581.5	806.7	791.2	730.2
P09525	ANXA4	Annexin A4	Homo sapiens	High	10	393.6	349.4	338.6	406.9	394.5	460.1	421.8	458.6	377.7	381.8	490.5
P08133	ANXA6	Annexin A6	Homo sapiens	High	50	7384.2	6931.5	7971.2	8118.4	8162	6574.5	7734.7	7932.4	7713	7283.5	7092.8
P20073	ANXA7	Annexin A7	Homo sapiens	High	15	1725.5	1487.7	1480.3	1845.6	1367.8	1386.5	1086.1	1030.9	1880.2	1915.4	1334.8
Q63HQ0	AP1AR	AP-1 complex-associated regulatory protein	Homo sapiens	High	2	51.5	29.4	36.9	47.6	28.6	36.4	27.6	32.3	48.2	40.8	33.9
Q10567	AP1B1	AP-1 complex subunit beta-1	Homo sapiens	High	15	2202	2511.9	2366.9	2357.6	2413	2735.3	2696.5	2853.2	2112	2272.3	2730.6
O43747	AP1G1	AP-1 complex subunit gamma-1	Homo sapiens	High	17	1157.9	1024.7	950.7	1130.8	935.9	1107.5	797	851.4	1169.8	1105.4	1052.4
O75843	AP1G2	AP-1 complex subunit gamma-like 2	Homo sapiens	High	12	648.4	544.4	529.1	601.4	547.7	879.1	631.4	586.3	745.6	634.7	922.4
Q9BXS5	AP1M1	AP-1 complex subunit mu-1	Homo sapiens	High	16	1270.9	1156.9	1175	1243.2	1206.4	1174.4	973.5	991	1280.4	1264.5	1190.9
P61966	AP1S1	AP-1 complex subunit sigma-1A	Homo sapiens	High	3	250.9	164.2	168.9	217.5	160.7	164.9	145.2	151.8	233.2	213.7	167.8
P56377	AP1S2	AP-1 complex subunit sigma-2	Homo sapiens	High	2	52.3	49.7	34	44	33.3	50.8	50.6	53.3	29.9	56.6	60.9
O95782	AP2A1	AP-2 complex subunit alpha-1	Homo sapiens	High	25	3051.2	2638.5	2569	2995.9	2417.4	2833.6	2172.6	2229.5	3304.6	3285.1	2656.5
O94973	AP2A2	AP-2 complex subunit alpha-2	Homo sapiens	High	16	918.8	924.5	882.7	720	816.8	1060.1	1004.2	1010.8	917	952.5	957.1
P63010	AP2B1	AP-2 complex subunit beta	Homo sapiens	High	15	1333.7	1282.1	1293.2	1349.4	1270.9	1103.5	985.9	1002.8	1385.2	1469.7	1085.6
Q96CW1	AP2M1	AP-2 complex subunit mu	Homo sapiens	High	16	1254.5	1085.4	1271.1	1201.7	1241.4	1169.1	1214.3	1242	1233.4	1216.8	1200.2
P53680	AP2S1	AP-2 complex subunit sigma	Homo sapiens	High	6	1467.3	813.4	768.1	1122.3	674	892	577.4	587.3	1242.5	1453.2	870.8
O00203	AP3B1	AP-3 complex subunit beta-1	Homo sapiens	High	23	1556.5	1729.4	1553.8	1614.5	1593.8	1820.7	2016.4	2107.3	1653.7	1720	1896.8
O14617	AP3D1	AP-3 complex subunit delta-1	Homo sapiens	High	26	1834.2	1743.8	1722.9	1845.1	1623.7	1804	1599.8	1703.6	1826.7	1703.3	1765.1
Q9Y2T2	AP3M1	AP-3 complex subunit mu-1	Homo sapiens	High	12	699.8	790.1	641.8	697.2	640.8	700.1	696.6	693.7	641.6	745.5	658.4
Q92572	AP3S1	AP-3 complex subunit sigma-1	Homo sapiens	High	5	471.1	400.1	629.6	515.9	639.6	366.1	546	529.1	524.7	501.4	352.8
Q9Y6B7	AP4B1	AP-4 complex subunit beta-1	Homo sapiens	High	1	18.4	13.3	9.5	16.1	8.1	15	8.2	10.3	15.8	16.2	16.6
Q9UPM8	AP4E1	AP-4 complex subunit epsilon-1	Homo sapiens	High	2	33.5	41.3	40.3	39.8	42.6	52.6	43.8	46.7	37.1	34.8	43
O00189	AP4M1	AP-4 complex subunit mu-1	Homo sapiens	High	4	120	112.6	84.6	104.5	79.7	183.2	88.4	99.7	121.9	121.3	182.8
Q9Y587	AP4S1	AP-4 complex subunit sigma-1	Homo sapiens	High	2	118.8	105.9	122.4	99.6	115.4	104	107.2	121.7	89.3	97.4	105.8
Q9H0R1	AP5M1	AP-5 complex subunit mu-1	Homo sapiens	High	3	126.3	84.8	84.4	106.4	82.3	95.5	71.8	77.7	127.3	106.2	80
O43299	AP5Z1	AP-5 complex subunit zeta-1	Homo sapiens	High	2	21.4	13.8	15.1	15.7	15.6	15.6	12.7	11.8	26.5	17	14
O14727	APAF1	Apoptotic protease-activating factor 1	Homo sapiens	High	1	15.8	22.3	20.6	13.5	26.5	98.9	57.1	55.5	13.9	10.9	103.3
O96018	APBA3	Amyloid beta A4 precursor protein-binding family A member 3	Homo sapiens	High	1	29.3	26.4	24.3	33.1	18.8	20.9	14.8	18.3	37.3	40.9	29.4
Q7Z5R6	APBB1IP	Amyloid beta A4 precursor protein-binding family B member 1-interacting protein	Homo sapiens	High	13	684.5	859.9	776.9	724.7	789.2	1023.1	839.7	839.9	733.1	733.3	906.1
P25054	APC	Adenomatous polyposis coli protein	Homo sapiens	High	2	81.4	70.1	72.4	84.3	54.1	81.8	59.9	60.3	97.1	92.1	63.1
P13798	APEH	Acylamino-acid-releasing enzyme	Homo sapiens	High	23	1871.5	1888.2	1727.7	1805.1	1689.5	1967.1	1841.2	1829.5	1732.5	2103	2128.9
P27695	APEX1	DNA-(apurinic or apyrimidinic site) lyase	Homo sapiens	High	21	2365.3	2706.5	2356.9	2280	2191.2	2227.2	2311.4	2498.1	2277.6	2391.2	2307.1
Q96BI3	APH1A	Gamma-secretase subunit APH-1A	Homo sapiens	High	1	25.9	38.4	38.5	29	34	51.9	50.9	46.1	26.6	26.8	59.4
Q9BZZ5	API5	Apoptosis inhibitor 5	Homo sapiens	High	25	2385.5	2443.4	2711	2502.4	2552.4	2513.1	3006	3095.5	2481.1	2167.1	2701.2
Q9BZZ5-2	API5	Isoform 2 of Apoptosis inhibitor 5	Homo sapiens	High	1	33.6	19.7	25.3	34.2	22.9	20	9.4	7.4	35	30.9	14.5
Q96GX9	APIP	Methylthioribulose-1-phosphate dehydratase	Homo sapiens	High	4	297.4	212.2	302.6	279.1	321.6	221.7	155.4	132.8	323.7	271.3	177.8
Q8N2Z9	APITD1	Centromere protein S	Homo sapiens	High	2	54.8	45.8	44.8	59.1	54.7	60.6	34.1	50.5	74	59.1	53.9
Q9HDC9	APMAP	Adipocyte plasma membrane-associated protein	Homo sapiens	High	17	1781.5	1293.4	1706.9	1869.2	1632.3	1437.7	1326.4	1251.5	1854.7	1823	1433.3
P02647	APOA1	Apolipoprotein A-I	Homo sapiens	High	1	13.3	23.6	140.4	53.5	200.1	96.1	246.7	310.6	71.3	46.4	117.3
P06727	APOA4	Apolipoprotein A-IV	Homo sapiens	High	1	12	15.2	51.7	57.8	48.9	28.2	47.5	54.3	50.3	42.2	30.4
P04114	APOB	Apolipoprotein B-100	Homo sapiens	High	1	23.8	32.2	19.9	17.4	22.1	44.4	41.4	42.1	18.5	13.4	39
Q9UH17	APOBEC3B	DNA dC->dU-editing enzyme APOBEC-3B	Homo sapiens	High	2	133.6	90.9	99.1	101.2	95.1	258.8	153.8	169.6	148.8	114.9	313.7
Q9NRW3	APOBEC3C	DNA dC->dU-editing enzyme APOBEC-3C	Homo sapiens	High	5	421.4	474.7	93.2	85.1	80.3	470.7	490.1	547	105.5	112.2	135
P02656	APOC3	Apolipoprotein C-III	Homo sapiens	High	1	23.1	16.2	31.7	29.5	23.7	23.4	35.6	46.2	22.8	31.2	32.3
P05090	APOD	Apolipoprotein D	Homo sapiens	Medium	1	23.2	49.3	71.2	48.3	65.3	42.1	64.9	66	35.5	40.5	38
P02649	APOE	Apolipoprotein E	Homo sapiens	High	3	28.4	38.6	262.3	189.8	306.1	106.1	328.1	398.5	146.6	169.7	110
P02749	APOH	Beta-2-glycoprotein 1	Homo sapiens	Medium	1	7.1	6.5	56.7	36.1	49	23.4	121.8	94.1	24.3	17.3	34.6
Q9BQE5	APOL2	Apolipoprotein L2	Homo sapiens	High	2	162.7	136.4	130.8	168.4	126.5	135.1	104.1	91.1	185.2	176.1	158.1
J3KQL8	APOL2	Apolipoprotein L2	Homo sapiens	Medium	2	39.5	26.4	27.5	29.6	27.7	24.3	19.2	13.4	40.6	42.3	23.8
O95445	APOM	Apolipoprotein M	Homo sapiens	High	2	30.6	27.3	95.9	108.2	126	34.8	84.6	97.4	118.7	75.4	39.4
Q9BUR5	APOO	MICOS complex subunit MIC26	Homo sapiens	High	5	292.7	264.6	297.6	379.2	310.3	283.8	224.2	243.7	415.1	455.1	264.3
Q6UXV4	APOOL	MICOS complex subunit MIC27	Homo sapiens	High	3	293.3	198.2	226.2	284.5	222	192.4	143.7	134.2	307.6	318.2	198.1
Q9UKG1	APPL1	DCC-interacting protein 13-alpha	Homo sapiens	High	14	814.9	649.5	621.5	776.8	574.1	588.9	420.2	387.8	927.1	847.9	585.1
Q8NEU8	APPL2	DCC-interacting protein 13-beta	Homo sapiens	High	2	85	42.8	61.9	87.3	56.4	54	41.7	43.8	94	66.3	64
P07741	APRT	Adenine phosphoribosyltransferase	Homo sapiens	High	10	861.8	955.9	786	946.3	751.9	960.6	805.8	713.2	945.9	926.2	809.5
Q7Z2E3	APTX	Aprataxin	Homo sapiens	High	2	79	85.3	60.2	71.1	56.2	79.3	57.6	52.6	75	74.8	80.6
O60306	AQR	Intron-binding protein aquarius	Homo sapiens	High	34	2247.7	2027	2196.7	2247.1	2070	2078.1	1932.6	1961.8	2288.7	2190.7	2138.6
P10398	ARAF	Serine/threonine-protein kinase A-Raf	Homo sapiens	High	5	238.4	136.4	142.3	153.5	135	104.9	78	72.9	224.1	246.3	99.3
Q96P48	ARAP1	Arf-GAP with Rho-GAP domain, ANK repeat and PH domain-containing protein 1	Homo sapiens	High	17	965.2	760.5	753.5	924.8	689.5	735.4	606.1	637	923.7	899.4	730.7
P48444	ARCN1	Coatomer subunit delta	Homo sapiens	High	28	2545.2	3332	2829.4	2596.4	3281.8	3459.7	3899	3915	2416.1	2614.2	3554
P61204	ARF3	ADP-ribosylation factor 3	Homo sapiens	High	5	1656.1	1785.2	1632.2	1775	1641.4	1982.5	1974.8	2023.6	1719.2	1833.1	1917.6
P18085	ARF4	ADP-ribosylation factor 4	Homo sapiens	High	7	1717.8	1598.2	1684.8	1820.1	1631.4	1695.1	1422.6	1422.8	1670.9	1771.8	1643.3
P84085	ARF5	ADP-ribosylation factor 5	Homo sapiens	High	4	358	545.5	381.5	391.4	371.2	604.3	394	409.4	364.1	425.1	580.3
P62330	ARF6	ADP-ribosylation factor 6	Homo sapiens	High	6	501.2	794	721	592.8	718.1	992.8	1196	1225.5	530.1	600.5	973.7
Q8N6T3	ARFGAP1	ADP-ribosylation factor GTPase-activating protein 1	Homo sapiens	High	7	625.6	462.5	406.4	492.7	435.8	385.7	295.3	315.8	542	539.9	375.8
Q8N6H7	ARFGAP2	ADP-ribosylation factor GTPase-activating protein 2	Homo sapiens	High	11	695.5	521.6	520.7	662.8	543	440.6	356.6	359.2	723.3	591.7	423.5
Q9NP61	ARFGAP3	ADP-ribosylation factor GTPase-activating protein 3	Homo sapiens	High	8	382.5	319.4	307.6	395.6	360.9	380	298.6	307.1	382	310.9	341.2
Q9Y6D6	ARFGEF1	Brefeldin A-inhibited guanine nucleotide-exchange protein 1	Homo sapiens	High	3	68.2	80.5	71.8	73.6	72.8	117.8	107.9	101.2	71.6	74.2	120.2
Q9Y6D5	ARFGEF2	Brefeldin A-inhibited guanine nucleotide-exchange protein 2	Homo sapiens	High	5	514.6	492.4	371.9	503.8	368.8	646.5	435.7	463.7	495	471.3	574.2
P53367	ARFIP1	Arfaptin-1	Homo sapiens	High	11	673.1	679.4	691.2	680.2	776.3	625	528.5	577.8	666.7	644.4	608.8
P53365	ARFIP2	Arfaptin-2	Homo sapiens	High	4	174.7	237.3	194.6	208.6	206.2	252.4	208	180.1	191	227.8	234.3
P05089	ARG1	Arginase-1	Homo sapiens	High	5	126.7	186.4	165	231.9	196.8	186.5	256	207.8	148.9	188.8	211.8
Q9NWB6	ARGLU1	Arginine and glutamate-rich protein 1	Homo sapiens	High	10	789.1	618.7	634.2	732.6	787.9	704.2	667.1	689.2	632.9	715.2	750.7
Q07960	ARHGAP1	Rho GTPase-activating protein 1	Homo sapiens	High	14	660.3	728.3	724	814.7	688	800.2	638.9	670.9	875.7	869	763.6
Q53QZ3	ARHGAP15	Rho GTPase-activating protein 15	Homo sapiens	High	8	666.5	567.3	908.7	806.3	921.8	632.1	758.9	783.8	748.7	701.8	642.2
Q68EM7	ARHGAP17	Rho GTPase-activating protein 17	Homo sapiens	High	7	295	277.5	256.6	321.1	221.1	283.7	200.4	208.1	336.3	381.8	261.9
Q14CB8	ARHGAP19	Rho GTPase-activating protein 19	Homo sapiens	High	4	111.4	174.7	171.6	176.3	183.6	200.1	239.7	224.3	108.7	136.5	197.9
Q7Z5H3	ARHGAP22	Rho GTPase-activating protein 22	Homo sapiens	Medium	1	28.8	28.9	14.3	18	11.3	23.3	8.9	11.5	19.1	21.6	19.8
Q9P227	ARHGAP23	Rho GTPase-activating protein 23	Homo sapiens	Medium	1	163.4	80	384.1	250.8	229.5	174.2	542.3	553.1	274.9	155.1	181.6
Q6ZUM4	ARHGAP27	Rho GTPase-activating protein 27	Homo sapiens	High	2	45.4	33.3	37.3	46.9	39.1	31.7	23	26.4	54.4	57.3	35.2
Q7Z6I6	ARHGAP30	Rho GTPase-activating protein 30	Homo sapiens	High	8	329.8	388.1	338.8	376.4	301.5	436.9	294.3	296.5	431.8	392.3	380.2
O14559	ARHGAP33	Rho GTPase-activating protein 33	Homo sapiens	High	1	9.2	9.9	11.7	10.2	21.2	6.7	14.1	11	22.4	46.2	14.3
Q9NRY4	ARHGAP35	Rho GTPase-activating protein 35	Homo sapiens	High	6	326.5	207.6	207.7	267.9	204.2	224.8	176.8	193.2	326.4	306.3	210.9
P98171	ARHGAP4	Rho GTPase-activating protein 4	Homo sapiens	High	14	1035.1	776.4	768	945.1	769.3	937.7	640.1	662.4	1057.6	990.4	853
Q5TG30	ARHGAP40	Rho GTPase-activating protein 40	Homo sapiens	High	1	55.9	34.3	27.3	50.4	39.1	35.7	22.8	27.1	56.4	46.3	37.3
Q13017	ARHGAP5	Rho GTPase-activating protein 5	Homo sapiens	High	6	180.5	205.5	184.4	197.9	162.7	182.1	144.8	162.5	197.4	146.3	163.1
Q9BRR9	ARHGAP9	Rho GTPase-activating protein 9	Homo sapiens	High	3	132.4	90.5	120	137.4	114.5	80.2	85.4	97.9	152.2	126.3	86.8
P52565	ARHGDIA	Rho GDP-dissociation inhibitor 1	Homo sapiens	High	15	1774	2233.3	1935.3	1808.8	2148.3	1881.6	1743.8	1745.7	1865.9	1916.4	1945.1
P52566	ARHGDIB	Rho GDP-dissociation inhibitor 2	Homo sapiens	High	22	1844.5	3806.2	3181.6	2380.8	3655.8	3995.6	5155.6	5051.2	2006.1	2237.9	4353.3
Q92888	ARHGEF1	Rho guanine nucleotide exchange factor 1	Homo sapiens	High	21	1489.5	1264.6	1354.8	1496.7	1389.3	1818.3	1453.1	1500.3	1533.7	1648.9	1701.2
Q6ZSZ5	ARHGEF18	Rho guanine nucleotide exchange factor 18	Homo sapiens	High	4	115.1	98.3	101.3	113.6	91.8	152.3	111.8	123.3	114.8	106	143.7
Q92974	ARHGEF2	Rho guanine nucleotide exchange factor 2	Homo sapiens	High	38	3239.7	2307.1	2577.2	3227.1	2354.4	2400.9	1834.3	1989.5	3760.1	3438.2	2287.5
Q15052	ARHGEF6	Rho guanine nucleotide exchange factor 6	Homo sapiens	High	12	761.4	701.3	617	661.7	548.2	675.1	553	589.3	754.8	754.5	647.8
Q14155	ARHGEF7	Rho guanine nucleotide exchange factor 7	Homo sapiens	High	7	212.7	279.6	281.6	254.3	292.1	346.2	341.4	366.4	264.9	294.8	315.7
O14497	ARID1A	AT-rich interactive domain-containing protein 1A	Homo sapiens	High	22	1467.5	1417	1821.4	1623.1	1564.1	1491.8	1670.9	1696.1	1644.6	1534.1	1459.3
Q8NFD5	ARID1B	AT-rich interactive domain-containing protein 1B	Homo sapiens	High	7	343.1	302	388.8	377.9	376.9	358.8	518.9	469.2	386.7	367.8	403
Q68CP9	ARID2	AT-rich interactive domain-containing protein 2	Homo sapiens	High	16	1591.2	1138.7	1389.4	1512.8	1309.5	983.9	956.6	918.6	1641.6	1542.7	1016.8
Q99856	ARID3A	AT-rich interactive domain-containing protein 3A	Homo sapiens	High	5	142.4	153.9	164.2	166.6	146.7	185.7	152.2	155.5	135.2	135.6	193.3
Q8IVW6	ARID3B	AT-rich interactive domain-containing protein 3B	Homo sapiens	High	4	99.2	100.5	116.1	119.3	90.5	148.3	101.3	113.7	144.8	152.6	149.9
P29374	ARID4A	AT-rich interactive domain-containing protein 4A	Homo sapiens	High	3	88.2	76.4	79.8	81.9	69	95.8	104.1	105.9	73.8	75.9	115.1
Q4LE39	ARID4B	AT-rich interactive domain-containing protein 4B	Homo sapiens	High	5	190.3	156.2	153.7	157.9	166.8	239	168.3	184.2	173.6	138.7	219.2
Q14865	ARID5B	AT-rich interactive domain-containing protein 5B	Homo sapiens	Medium	1	18.4	18.2	9.5	9.8	7.9	10.3	5.2	5.5	9	9.3	59.2
Q9Y4X5	ARIH1	E3 ubiquitin-protein ligase ARIH1	Homo sapiens	High	5	316.8	365.2	329.7	329.9	351	360.3	367.7	412.9	279.3	330.4	348.3
O95376	ARIH2	E3 ubiquitin-protein ligase ARIH2	Homo sapiens	High	10	323.5	264.5	264.6	310.7	271.4	292.3	241.8	240.7	324.4	307.3	286.7
P40616	ARL1	ADP-ribosylation factor-like protein 1	Homo sapiens	High	7	843.1	766.4	699	682.1	760.4	769.3	619.8	706.7	523.1	544.4	697.8
Q3SXY8	ARL13B	ADP-ribosylation factor-like protein 13B	Homo sapiens	High	2	35	24.9	10.1	20.1	9.9	18.6	8.7	9.5	20.2	22	13.6
Q8N8R7	ARL14EP	ARL14 effector protein	Homo sapiens	High	2	29.8	27.1	21.5	17.6	19.7	29.7	18.6	19.5	26.3	22.3	26.4
Q9NXU5	ARL15	ADP-ribosylation factor-like protein 15	Homo sapiens	High	1	77.7	38.6	55.5	80.8	48.5	47.6	36	27.4	103.2	98.6	45.6
P36404	ARL2	ADP-ribosylation factor-like protein 2	Homo sapiens	High	9	753.9	799.1	769.3	771.6	830.5	938.4	773.3	780.9	671.6	682.9	895
Q9Y2Y0	ARL2BP	ADP-ribosylation factor-like protein 2-binding protein	Homo sapiens	Medium	1	15.1	15.8	25.4	22.5	7.4	17.6	17.6	20	12.1	11.7	19.1
P36405	ARL3	ADP-ribosylation factor-like protein 3	Homo sapiens	High	6	547.6	510.1	555.7	636.5	507.9	564.2	426.7	432.7	642.6	592	524.6
P56559	ARL4C	ADP-ribosylation factor-like protein 4C	Homo sapiens	Medium	1	15	20.5	22.4	25.4	16.6	24.4	15.3	12.9	24	22.6	22.9
Q9Y689	ARL5A	ADP-ribosylation factor-like protein 5A	Homo sapiens	High	1	115.4	80.4	81.2	119.4	72.5	84	54.6	50.3	120	112.2	74.1
Q96KC2	ARL5B	ADP-ribosylation factor-like protein 5B	Homo sapiens	High	1	34.2	33.8	41.7	45.6	37	32	47.2	44.1	38.7	31.4	41.8
Q9H0F7	ARL6	ADP-ribosylation factor-like protein 6	Homo sapiens	High	1	47.4	61.6	56	50.7	62.5	53.7	58.5	62.6	48	29.3	54
Q15041	ARL6IP1	ADP-ribosylation factor-like protein 6-interacting protein 1	Homo sapiens	High	4	203.9	246.1	338.7	262.6	302.8	314.8	413	386.1	255.6	302.5	288
Q66PJ3	ARL6IP4	ADP-ribosylation factor-like protein 6-interacting protein 4	Homo sapiens	High	3	191.6	194.2	164.8	169.6	156.3	156	99.4	105.5	212.9	243.9	129.9
O75915	ARL6IP5	PRA1 family protein 3	Homo sapiens	High	4	435.4	283.8	367.9	437.3	336.1	322.9	320.6	298.1	391.4	396.9	345.6
Q8N6S5	ARL6IP6	ADP-ribosylation factor-like protein 6-interacting protein 6	Homo sapiens	High	1	18.2	34.4	25.2	23	21.3	29.2	13.4	13.4	30.6	22.9	30.1
Q96BM9	ARL8A	ADP-ribosylation factor-like protein 8A	Homo sapiens	High	2	101.8	152.9	124	120.3	116.7	222.8	173	168.7	90.1	92.1	197.1
Q9NVJ2	ARL8B	ADP-ribosylation factor-like protein 8B	Homo sapiens	High	5	711	661.6	721.7	745.1	708.3	760.7	831.5	899.6	689.7	724.7	724.9
Q9NVT9	ARMC1	Armadillo repeat-containing protein 1	Homo sapiens	High	6	321.9	237.9	275.3	359.8	247.1	244.7	226.6	229.5	380.9	358.8	258.8
Q8N2F6	ARMC10	Armadillo repeat-containing protein 10	Homo sapiens	High	3	125.8	103.2	128.7	138	105.8	143.8	209	205.2	130.5	118.7	149.4
Q6NXE6	ARMC6	Armadillo repeat-containing protein 6	Homo sapiens	High	7	449.8	541.4	443.3	438.1	408.5	412.5	349.5	337.8	438.3	484	429.8
Q8IUR7	ARMC8	Armadillo repeat-containing protein 8	Homo sapiens	High	8	306.2	341.4	290.2	326.5	277.1	326.8	277	267.8	311	337.8	321.8
Q9UH62	ARMCX3	Armadillo repeat-containing X-linked protein 3	Homo sapiens	High	5	262.6	215.1	227	266.4	213.1	326.2	238.4	239	275.5	238.2	299.6
Q9H993	ARMT1	Protein-glutamate O-methyltransferase	Homo sapiens	High	14	1051.4	1048.2	1343.5	990.2	1402.1	1325.9	1558.3	1695.6	1219.4	1137.3	1287.6
P27540	ARNT	Aryl hydrocarbon receptor nuclear translocator	Homo sapiens	High	2	126.5	61.9	66.1	105.1	76.2	54.4	27.5	33.1	91	150.2	47.3
Q92747	ARPC1A	Actin-related protein 2/3 complex subunit 1A	Homo sapiens	High	9	439.2	439.6	424.1	436	452	361	394.3	369.2	444.4	497.2	368
O15143	ARPC1B	Actin-related protein 2/3 complex subunit 1B	Homo sapiens	High	13	843.3	1313.1	1020.1	890	1170.1	1375.6	1172.5	1268.8	966.6	1074.7	1287.8
O15144	ARPC2	Actin-related protein 2/3 complex subunit 2	Homo sapiens	High	20	2528.9	2742.2	2403.8	2500.4	2528.9	2683.7	2697.7	2701.4	2388.7	2463.6	2881.8
O15145	ARPC3	Actin-related protein 2/3 complex subunit 3	Homo sapiens	High	6	766.9	802.4	763.2	827.8	772.6	869.5	903.4	895.7	884.6	764.9	698
P59998	ARPC4	Actin-related protein 2/3 complex subunit 4	Homo sapiens	High	11	702.8	727.6	629.9	718.3	600.5	1017	634.3	641.5	669.5	741.6	937.6
O15511	ARPC5	Actin-related protein 2/3 complex subunit 5	Homo sapiens	High	3	182.2	180.6	266.7	209.3	265.9	181.1	233	230.6	192.6	210	166.2
Q9BPX5	ARPC5L	Actin-related protein 2/3 complex subunit 5-like protein	Homo sapiens	High	3	316.4	345.2	352.6	398.8	443.3	583.4	427.8	510.2	309.9	175.1	288.9
P56211	ARPP19	cAMP-regulated phosphoprotein 19	Homo sapiens	High	2	57	64.4	62.4	61.4	56.2	58.6	49.7	47.2	58.9	78.8	68.2
Q9UBL0	ARPP21	cAMP-regulated phosphoprotein 21	Homo sapiens	High	1	32.7	33.3	32.9	33.7	38	37.8	41.7	47	36.9	30.2	38.9
P32121	ARRB2	Beta-arrestin-2	Homo sapiens	High	12	583.1	510.6	546.9	573.3	544.6	509.1	505.4	588.9	507.1	506.7	550
P15289	ARSA	Arylsulfatase A	Homo sapiens	High	2	65.2	31.4	58.5	85.5	57.2	44.3	24.2	21.3	102.7	104.2	43.9
Q9HBK9	AS3MT	Arsenite methyltransferase	Homo sapiens	High	4	149.5	109.9	124.1	141.8	117.3	124.4	109.1	118.8	130.7	128.4	132.7
Q13510	ASAH1	Acid ceramidase	Homo sapiens	High	6	286.3	250	233.9	303	218.6	272.6	196.5	164.8	265.7	306.6	271.2
Q9ULH1	ASAP1	Arf-GAP with SH3 domain, ANK repeat and PH domain-containing protein 1	Homo sapiens	Medium	1	33.4	22.7	28	27.9	23	31.7	26.4	20.6	25.4	38.5	28
Q9Y576	ASB1	Ankyrin repeat and SOCS box protein 1	Homo sapiens	High	1	86.1	46.6	62.9	89.8	63.8	45.7	54	51.5	92.1	77.2	53
Q9NWX5	ASB6	Ankyrin repeat and SOCS box protein 6	Homo sapiens	High	2	76.4	46.5	41.9	58.8	39.3	71.2	37.3	40	60.9	50.9	60.7
Q96DX5	ASB9	Ankyrin repeat and SOCS box protein 9	Homo sapiens	High	1	45.2	27.8	30.5	35.8	23.3	22.2	16.6	16.7	44.6	43	35
Q8N9N2	ASCC1	Activating signal cointegrator 1 complex subunit 1	Homo sapiens	High	7	429.8	454	381.1	433.5	403.4	408.8	358.6	345.4	400.9	410.3	440.4
Q9H1I8	ASCC2	Activating signal cointegrator 1 complex subunit 2	Homo sapiens	High	8	421.4	415.9	389.6	433.3	348.5	468.5	338.2	401.3	413.4	447.7	430.6
Q8N3C0	ASCC3	Activating signal cointegrator 1 complex subunit 3	Homo sapiens	High	35	2246.7	2004.7	1791.5	1920.6	1745.3	2200.4	1942.7	2068.3	2105.9	2127.3	2167.9
Q9Y294	ASF1A	Histone chaperone ASF1A	Homo sapiens	High	5	246.8	307	263.8	205.3	253.9	339.9	361.9	379.1	233.4	259.3	325.8
Q9NVP2	ASF1B	Histone chaperone ASF1B	Homo sapiens	High	5	277.9	267	169.6	229.5	131.9	184.4	122	89.1	290	310.8	171.4
Q9UBL3	ASH2L	Set1/Ash2 histone methyltransferase complex subunit ASH2	Homo sapiens	High	14	920.4	881.1	1095	815.9	1052.3	804	1081.3	1112.4	916	915.6	864.2
P04424	ASL	Argininosuccinate lyase	Homo sapiens	High	1	14.2	10.3	12	9.1	11.2	14.6	8.9	11.8	13	15.9	19.9
O95671	ASMTL	N-acetylserotonin O-methyltransferase-like protein	Homo sapiens	High	5	90.6	144.4	92.5	81.3	85.5	128.1	122.8	110.8	80.1	99.9	142.5
O43681	ASNA1	ATPase ASNA1	Homo sapiens	High	7	802.6	630	680.4	759.5	538.8	583.2	490.3	553.2	849.1	733.4	572.5
P08243	ASNS	Asparagine synthetase [glutamine-hydrolyzing]	Homo sapiens	High	26	2324.4	1883.1	2572	2485.7	2612.3	2367.2	2374.7	2718.7	2311.8	2439	2295.7
U3KQP1	ASNSD1	Asparagine synthetase domain-containing protein 1 (Fragment)	Homo sapiens	High	2	40.8	62.9	62.2	43.7	59.4	69.9	43.1	43.5	36.9	47.2	52.2
Q12797	ASPH	Aspartyl/asparaginyl beta-hydroxylase	Homo sapiens	High	3	84.5	94.9	105.5	97	85.1	83.3	63.9	58.7	91.8	126.6	75.6
Q8IZT6	ASPM	Abnormal spindle-like microcephaly-associated protein	Homo sapiens	High	7	249.9	217	164.2	247.7	173.9	237.7	142.4	138.3	207.4	208.7	221.5
Q9BZE9	ASPSCR1	Tether containing UBX domain for GLUT4	Homo sapiens	High	2	59.1	51.2	42	62.1	38.9	41.4	35.5	35.9	63.9	62.2	46.8
Q7L266	ASRGL1	Isoaspartyl peptidase/L-asparaginase	Homo sapiens	High	3	139.2	139.6	123.7	135.2	145.7	130.7	180.9	200.9	136.4	110.7	132.1
P00966	ASS1	Argininosuccinate synthase	Homo sapiens	High	4	366.1	314	306.4	381.2	294.3	315.1	220	230.2	430.8	428	328.9
Q9NVM9	ASUN	Protein asunder homolog	Homo sapiens	High	14	868.1	805.2	706.8	771.6	691.3	768.2	633.4	669.9	874.1	912.8	762.4
Q8NBU5	ATAD1	ATPase family AAA domain-containing protein 1	Homo sapiens	High	9	496.6	540.9	630	381.9	664	671.1	741.5	754	545.7	600.2	630.1
Q6PL18	ATAD2	ATPase family AAA domain-containing protein 2	Homo sapiens	High	25	1377.2	1035.3	1343.2	1251.3	1265	1200.6	1247.9	1209.6	1419.5	1314.5	1269.2
Q9ULI0	ATAD2B	ATPase family AAA domain-containing protein 2B	Homo sapiens	High	9	435.1	412.3	487.8	439.9	433.7	464.9	381.7	393.2	471.5	411.8	427
Q9NVI7	ATAD3A	ATPase family AAA domain-containing protein 3A	Homo sapiens	High	11	3194.5	2807.3	2697.1	3385.4	2537.6	2853.6	2569.9	2460.3	3423.3	3469.1	2883.4
Q5T9A4	ATAD3B	ATPase family AAA domain-containing protein 3B	Homo sapiens	High	4	196	275.3	245.3	186.8	344	331	543.7	587	143.3	157.3	360.9
O95260	ATE1	Arginyl-tRNA--protein transferase 1	Homo sapiens	High	5	174.8	215.6	194.3	164.2	203.4	217.4	302	333.8	148.1	138.2	239.8
P18846	ATF1	Cyclic AMP-dependent transcription factor ATF-1	Homo sapiens	High	1	118.9	179.1	135.1	94.8	144.7	192.6	158.6	142.3	112.4	115.3	208.4
P15336	ATF2	Cyclic AMP-dependent transcription factor ATF-2	Homo sapiens	High	2	158	178	239.7	172.5	233.1	277.4	312.6	354.3	210.4	184.8	233.8
P18850	ATF6	Cyclic AMP-dependent transcription factor ATF-6 alpha	Homo sapiens	High	2	51.3	28	28.3	43.4	31.6	19.6	16.3	18.8	49.2	47.8	25.3
P17544	ATF7	Cyclic AMP-dependent transcription factor ATF-7	Homo sapiens	High	1	34.4	49.8	42.3	45	47.4	55.7	46.5	54.7	34	41.3	56.3
Q6VMQ6	ATF7IP	Activating transcription factor 7-interacting protein 1	Homo sapiens	High	3	146.5	137.4	103.8	121	101.4	111	91.5	97.1	137.2	118	122.4
Q9BSB4	ATG101	Autophagy-related protein 101	Homo sapiens	High	4	120.1	95.9	89.5	59.8	84.5	109.5	70.4	66.6	115.4	138.5	83.5
O94817	ATG12	Ubiquitin-like protein ATG12	Homo sapiens	High	2	125.4	163.8	153.3	142.9	149.8	181.5	196.5	214.4	116.9	124.7	190.9
O75143	ATG13	Autophagy-related protein 13	Homo sapiens	High	3	116.7	77.9	87.7	127.6	86	56	44.8	50.7	159.5	118.8	62.4
Q676U5	ATG16L1	Autophagy-related protein 16-1	Homo sapiens	High	4	174.9	156.8	152.7	188.8	126.6	152.2	110.4	128.5	226.8	191.6	171.6
Q2TAZ0	ATG2A	Autophagy-related protein 2 homolog A	Homo sapiens	High	4	160	80.5	84.9	106.2	80.9	66.8	63	56.2	150.6	152.4	79.2
Q96BY7	ATG2B	Autophagy-related protein 2 homolog B	Homo sapiens	High	3	161	131.4	113.5	134.8	97.8	131.6	106.1	112.9	160.3	141.5	131.6
Q9NT62	ATG3	Ubiquitin-like-conjugating enzyme ATG3	Homo sapiens	High	7	585	559.9	553.9	608.4	585.3	469	452.5	439.9	588.8	567.9	519.5
Q9Y4P1	ATG4B	Cysteine protease ATG4B	Homo sapiens	High	7	334.1	288.9	278.5	307.7	256.1	208.8	152.4	157.3	322.9	297.4	206.7
Q86TL0	ATG4D	Cysteine protease ATG4D	Homo sapiens	Medium	1	23	18.8	15.7	20.8	11.6	17.2	15.2	14.9	22.5	19.5	22.5
Q9H1Y0	ATG5	Autophagy protein 5	Homo sapiens	High	8	403.3	367.9	345.7	387.3	325.5	392.6	358.4	382.6	385.1	323.3	403.4
O95352	ATG7	Ubiquitin-like modifier-activating enzyme ATG7	Homo sapiens	High	9	420.5	516.9	399.9	403.4	413.4	402.5	330	333	432.9	450.9	429.8
Q7Z3C6	ATG9A	Autophagy-related protein 9A	Homo sapiens	High	2	127.3	76.1	96.3	112.8	87.9	131.2	67.4	77	117.7	122.8	121.9
P31939	ATIC	Bifunctional purine biosynthesis protein PURH	Homo sapiens	High	41	4763.9	4683.9	4482.1	4503	4683.8	4155.6	3786.1	3831.4	4379.8	4397.5	4117.1
Q8NHH9	ATL2	Atlastin-2	Homo sapiens	High	6	279.5	337	319.2	247.6	320	521.1	496.3	436.2	285	246.6	450.4
Q6DD88	ATL3	Atlastin-3	Homo sapiens	High	18	1676.9	1386.8	2154	1894.2	1981.6	1593	2550.3	2425.4	1852.4	1768.6	1607.8
O00244	ATOX1	Copper transport protein ATOX1	Homo sapiens	High	1	45.9	220.1	191.5	102.9	242.8	356.8	467.2	464.3	76.8	62.8	233.7
Q9Y2G3	ATP11B	Probable phospholipid-transporting ATPase IF	Homo sapiens	High	10	552.2	503.7	537.3	481.9	535.6	607.5	721.4	763.9	556.7	551	607.5
Q8NB49	ATP11C	Phospholipid-transporting ATPase IG	Homo sapiens	High	6	336	257.7	200.1	200.4	194.9	200.8	174.5	167.1	271.4	282	229.1
Q9HD20	ATP13A1	Manganese-transporting ATPase 13A1	Homo sapiens	High	14	583.9	482.4	573.5	533.2	515.6	493.3	540	541.5	658.5	510.1	487.9
Q9H7F0	ATP13A3	Probable cation-transporting ATPase 13A3	Homo sapiens	High	4	67	80.1	71	62.7	67.4	68	84.5	75.3	56.2	77.9	77.4
P05023	ATP1A1	Sodium/potassium-transporting ATPase subunit alpha-1	Homo sapiens	High	25	3293.6	3588.3	2825.7	2743.2	2489.9	2532.1	2676.3	2555.5	3034.8	3305.4	2640.8
P13637	ATP1A3	Sodium/potassium-transporting ATPase subunit alpha-3	Homo sapiens	High	10	403.8	481.5	272.2	313.2	272.6	418.2	241.3	261.4	314.5	364.6	367
P54709	ATP1B3	Sodium/potassium-transporting ATPase subunit beta-3	Homo sapiens	High	10	936.3	1044.6	965.8	857.1	1009.4	888.6	1262.9	1240.5	741.5	680.1	867.9
Q9Y6H3	ATP23	Mitochondrial inner membrane protease ATP23 homolog	Homo sapiens	High	1	38.3	22.1	27.6	44.3	23.7	28.1	21.1	22.3	45.9	37	39.4
P16615	ATP2A2	Sarcoplasmic/endoplasmic reticulum calcium ATPase 2	Homo sapiens	High	24	2055.6	2122.8	2262.1	2159.7	2052.7	2110.8	2442.3	2334.6	1812.9	1954.6	2248.5
Q93084	ATP2A3	Sarcoplasmic/endoplasmic reticulum calcium ATPase 3	Homo sapiens	High	10	637.1	500.8	591.9	628.7	551.2	530	541.1	526.6	703.4	742.8	612.5
P20020	ATP2B1	Plasma membrane calcium-transporting ATPase 1	Homo sapiens	High	4	86.5	132.2	152.9	93	111	146.7	142.1	169.7	96.9	89.3	159.3
P23634	ATP2B4	Plasma membrane calcium-transporting ATPase 4	Homo sapiens	High	7	927	856.2	789.6	783.5	746	717.7	693.2	659.9	961.6	978.9	735.2
P98194	ATP2C1	Calcium-transporting ATPase type 2C member 1	Homo sapiens	High	9	333.4	356.1	360.2	405.4	342.7	432.1	410.4	391.1	423.2	386.6	391.4
P25705	ATP5A1	ATP synthase subunit alpha, mitochondrial	Homo sapiens	High	45	7831.8	8527.1	8985.4	9821.2	9225.8	8416.3	9979.3	8963.5	8559.7	8703.2	9717.5
P06576	ATP5B	ATP synthase subunit beta, mitochondrial	Homo sapiens	High	32	8741.4	7856.3	8644	9518.4	8875.5	8067.6	9005.7	8851.7	8984.8	9273.5	8542.5
P36542	ATP5C1	ATP synthase subunit gamma, mitochondrial	Homo sapiens	High	12	1361.6	1396.5	1743	1454.7	1862.8	1303.6	1890.7	1663.5	1442.6	1559.9	1453.2
P30049	ATP5D	ATP synthase subunit delta, mitochondrial	Homo sapiens	High	4	111.8	180.9	138.1	147.3	154.7	127.8	169.1	149.8	137.2	193.6	164.8
P56381	ATP5E	ATP synthase subunit epsilon, mitochondrial	Homo sapiens	High	2	172.7	251.1	231.6	240.3	206.6	201	183.8	158.6	233.9	206.6	176.7
P24539	ATP5F1	ATP synthase F(0) complex subunit B1, mitochondrial	Homo sapiens	High	16	2684.9	2299.6	2900.7	2885.3	3005.7	1772.4	2173.3	2130.3	2801.6	2723.1	1752.1
P48201	ATP5G3	ATP synthase F(0) complex subunit C3, mitochondrial	Homo sapiens	Medium	1	49.9	113.1	142.6	96.7	165.9	74	260.5	183.5	78.8	102	108
O75947	ATP5H	ATP synthase subunit d, mitochondrial	Homo sapiens	High	14	789.7	1476.3	1558.9	1256.1	1712.9	1749.5	2528	2240.8	1056.6	1124.3	1589
P56385	ATP5I	ATP synthase subunit e, mitochondrial	Homo sapiens	High	4	265.4	374.8	386.1	320.7	390.4	335	456.9	365.4	325.3	237.3	320.8
P18859	ATP5J	ATP synthase-coupling factor 6, mitochondrial	Homo sapiens	High	2	49.4	70.8	68.7	47.1	47.8	68.7	60.5	57.8	52.8	43.1	61.1
P56134	ATP5J2	ATP synthase subunit f, mitochondrial	Homo sapiens	High	3	323.9	351.2	389.7	412.2	374.9	567.4	446	494.8	353.2	315.2	455.2
O75964	ATP5L	ATP synthase subunit g, mitochondrial	Homo sapiens	High	5	146.1	388.4	345.4	221.8	312.6	300.9	538	494	199.6	167.3	338.3
P48047	ATP5O	ATP synthase subunit O, mitochondrial	Homo sapiens	High	15	1918.5	1896.3	2126.6	2407.6	2122.3	1725.5	2216.7	1976.1	2130.6	2035.8	1752.8
Q99766	ATP5S	ATP synthase subunit s, mitochondrial	Homo sapiens	High	1	55.5	26.7	45	61.6	34.8	24.4	23.4	20.7	60.5	55.3	27.8
Q9NW81	ATP5SL	ATP synthase subunit s-like protein	Homo sapiens	High	4	186.8	147.9	148.4	143	150.7	148.3	159.7	175.4	151.5	135.3	150.8
Q15904	ATP6AP1	V-type proton ATPase subunit S1	Homo sapiens	High	8	479.1	469.2	424.5	525.8	390.9	528.4	435.4	447.8	541.4	485.4	539.8
O75787	ATP6AP2	Renin receptor	Homo sapiens	High	8	319.3	320.4	292.1	355.1	343	355.3	347.3	343.4	340	344.4	397.8
Q93050	ATP6V0A1	V-type proton ATPase 116 kDa subunit a isoform 1	Homo sapiens	High	2	84.8	39.3	47.3	80.9	46.2	51.5	23.7	29.7	83	63.3	42.9
Q9Y487	ATP6V0A2	V-type proton ATPase 116 kDa subunit a isoform 2	Homo sapiens	High	7	338.2	219.9	268.1	277.7	227.5	183.8	212.4	221.7	294.5	257.7	186.4
P61421	ATP6V0D1	V-type proton ATPase subunit d 1	Homo sapiens	High	8	257	275.8	238.3	254.5	228.9	266	246.6	233.6	245.1	253.5	283
P38606	ATP6V1A	V-type proton ATPase catalytic subunit A	Homo sapiens	High	22	2360.1	2037.2	2241.7	2041.5	2337.8	1977.5	1845.2	1941.6	2480.6	2460	1959.4
P21281	ATP6V1B2	V-type proton ATPase subunit B, brain isoform	Homo sapiens	High	24	1912.6	1767.2	1568.6	1756.7	1550.1	1690.1	1232.6	1233.6	1756.6	1999.2	1533.2
P21283	ATP6V1C1	V-type proton ATPase subunit C 1	Homo sapiens	High	13	981	1080.7	1005.5	956.7	1052.2	1113.5	1225.8	1192.9	918.1	1000.5	1109.8
Q9Y5K8	ATP6V1D	V-type proton ATPase subunit D	Homo sapiens	High	9	596.7	526.4	418.3	574.5	438.2	578.1	427.5	418.8	607	558.4	590.9
P36543	ATP6V1E1	V-type proton ATPase subunit E 1	Homo sapiens	High	11	1456.3	1287.2	1324.3	1371.6	1422.1	1393	1229	1232.2	1178	1144.5	1444.8
Q16864	ATP6V1F	V-type proton ATPase subunit F	Homo sapiens	High	2	23.2	36.5	21	23.9	23.1	36.7	35.5	34.9	24	23.9	21.8
O75348	ATP6V1G1	V-type proton ATPase subunit G 1	Homo sapiens	High	3	172.3	90.4	94.1	127	96.2	65.4	44.4	53.1	123.6	114.3	70.4
Q9UI12	ATP6V1H	V-type proton ATPase subunit H	Homo sapiens	High	9	664.8	526	519.3	572.8	521.1	609.2	506.5	532.4	629.1	527.3	641.3
O43861	ATP9B	Probable phospholipid-transporting ATPase IIB	Homo sapiens	High	1	12.3	22.4	11.9	10	10.7	17.8	15.1	12	11.4	11.7	14.6
Q5TC12	ATPAF1	ATP synthase mitochondrial F1 complex assembly factor 1	Homo sapiens	High	8	543	518	524.6	556.5	483.5	552.6	497.9	520.1	510.3	534.9	542
Q8N5M1	ATPAF2	ATP synthase mitochondrial F1 complex assembly factor 2	Homo sapiens	High	3	56.2	67.8	57.3	55.8	68	110.9	99.5	122.4	68.6	62.7	97.5
Q9UII2	ATPIF1	ATPase inhibitor, mitochondrial	Homo sapiens	High	7	445.3	325	442.8	410.5	506.5	372.4	719.3	702.1	342.3	384.5	497.8
Q13535	ATR	Serine/threonine-protein kinase ATR	Homo sapiens	High	19	948	616.6	552.1	737.4	500.1	674.5	401.4	429.3	953.1	910.7	658.7
Q6UW56	ATRAID	All-trans retinoic acid-induced differentiation factor	Homo sapiens	High	1	64.4	41.6	40.8	63.3	42.5	37.2	32.5	31.1	75.2	59.3	28.9
Q8WXE1	ATRIP	ATR-interacting protein	Homo sapiens	High	1	31	23.6	23	25.5	18.7	9.5	6.2	4.3	33.6	31.3	12.5
O75882	ATRN	Attractin	Homo sapiens	High	2	96.4	75.1	63	79.2	57	87.4	71.9	62.1	89	85.1	74
P46100	ATRX	Transcriptional regulator ATRX	Homo sapiens	High	7	289.5	176	194.5	211.2	206	198.7	167.3	166.1	259.1	259.2	197
Q9UBB4	ATXN10	Ataxin-10	Homo sapiens	High	24	2094.3	2827.4	2369	2376.4	2389.3	3106.6	2724.1	2759.6	2242.6	2199	3116.1
P0C7T5	ATXN1L	Ataxin-1-like	Homo sapiens	High	1	29.9	16.9	19.1	22.3	16.4	26	15.5	17.9	22	26	19.5
Q99700	ATXN2	Ataxin-2	Homo sapiens	High	11	1114.7	1186.8	1005.2	986.6	1049.3	1072.7	980.6	1045.1	960.1	973	1144.2
Q8WWM7	ATXN2L	Ataxin-2-like protein	Homo sapiens	High	26	2062.6	2105.2	2052.9	2075.1	2212.9	1927.6	1990.9	2088.5	2170.3	2045.2	1999.1
P54252	ATXN3	Ataxin-3	Homo sapiens	High	5	177.4	233.3	246	186.1	206.5	239.3	197.6	186.2	208.2	172.1	230.2
Q13825	AUH	Methylglutaconyl-CoA hydratase, mitochondrial	Homo sapiens	High	3	109.1	68.4	82.5	109.5	83.2	72.1	79.2	79.9	103.3	91.8	72
Q9Y679	AUP1	Ancient ubiquitous protein 1	Homo sapiens	High	5	284.7	236.6	281.6	342.9	265.6	214.5	189	185.2	330.1	297.1	190.6
O14965	AURKA	Aurora kinase A	Homo sapiens	High	6	677.6	448.7	550.9	849.4	589.4	351.1	249	234.8	528.8	551.5	331
Q96GD4	AURKB	Aurora kinase B	Homo sapiens	High	6	655.9	442.5	774.3	481.2	723.6	407.8	381.6	379	543.7	531.9	273.2
Q9NQS1	AVEN	Cell death regulator Aven	Homo sapiens	High	2	23.5	29.8	27.4	27.9	28	24.5	30.4	29.4	25.1	29.9	37.7
Q8NBF6	AVL9	Late secretory pathway protein AVL9 homolog	Homo sapiens	High	4	287.5	226.6	271.3	289.5	250.5	252.5	240.4	263.5	257.3	285	251
P25311	AZGP1	Zinc-alpha-2-glycoprotein	Homo sapiens	High	1	15	21.1	15.4	22.1	14.1	21.3	11.2	10	24.2	31.4	15.9
Q96L58	B3GALT6	Beta-1,3-galactosyltransferase 6	Homo sapiens	High	2	94.3	59.9	64.4	86	52.3	76.7	42.8	54	86.3	82.6	66.1
O94766	B3GAT3	Galactosylgalactosylxylosylprotein 3-beta-glucuronosyltransferase 3	Homo sapiens	High	5	264.7	222.6	246	283.1	252.6	243.9	251.3	271.5	309.2	343.4	255.2
Q9NY97	B3GNT2	N-acetyllactosaminide beta-1,3-N-acetylglucosaminyltransferase 2	Homo sapiens	High	2	104.8	56.9	69.2	85	67.7	56.4	49.1	50.8	96.2	88.1	64.1
P15291	B4GALT1	Beta-1,4-galactosyltransferase 1	Homo sapiens	Medium	1	57.4	39.2	35.1	41.6	25.4	45.5	33.4	32.2	48.8	30.7	34.8
O60512	B4GALT3	Beta-1,4-galactosyltransferase 3	Homo sapiens	High	1	20.2	15.8	12.6	16.1	14	11.9	9.6	10.1	14.1	19.2	10.9
Q9UBV7	B4GALT7	Beta-1,4-galactosyltransferase 7	Homo sapiens	High	1	28.7	19.4	22	41.1	22.5	16.9	19.4	17.9	38.7	28.8	29.3
Q9NWV8	BABAM1	BRISC and BRCA1-A complex member 1	Homo sapiens	High	2	57.5	46.7	55	52.7	52.9	50	39.1	41.6	71.4	70.1	55.4
Q92934	BAD	Bcl2-associated agonist of cell death	Homo sapiens	High	2	20.2	9	15.3	13.5	12	10.2	4.6	9	13.8	22.1	11.6
Q99933	BAG1	BAG family molecular chaperone regulator 1	Homo sapiens	High	1	107.3	183.9	132.8	115.6	126.4	187	137.1	150.7	100.3	111	168.1
O95816	BAG2	BAG family molecular chaperone regulator 2	Homo sapiens	High	7	544.7	515.8	511	533	430.4	566.9	414.5	396.8	582.4	605.6	546.1
O95817	BAG3	BAG family molecular chaperone regulator 3	Homo sapiens	High	8	213	231.4	232.7	257.2	227.1	275.3	192.1	205.7	275.9	270.6	262.7
O95429	BAG4	BAG family molecular chaperone regulator 4	Homo sapiens	High	3	35.2	49.3	40.7	44.2	46.4	55	45.8	56.5	52.5	54	41.2
Q9UL15	BAG5	BAG family molecular chaperone regulator 5	Homo sapiens	High	11	347	516.5	368.2	349.6	386.6	515.9	424.6	425.3	318.1	338.6	513.8
P46379	BAG6	Large proline-rich protein BAG6	Homo sapiens	High	21	1854	1896.9	1698	1746.3	1560	1602	1517.1	1530.8	2105.9	2004	1561.4
Q16611	BAK1	Bcl-2 homologous antagonist/killer	Homo sapiens	High	3	148.8	94	154	220.5	126.4	114.9	92.3	85.2	238	225.1	99.4
O75531	BANF1	Barrier-to-autointegration factor	Homo sapiens	High	5	107	189	235.4	160.2	199.4	326	487.3	513.6	139.2	156.4	246.4
Q8N9N5	BANP	Protein BANP	Homo sapiens	High	1	33.4	10.4	20.7	24.3	8.4	6.9	7.2	3.9	21	27.6	5.6
Q92560	BAP1	Ubiquitin carboxyl-terminal hydrolase BAP1	Homo sapiens	High	4	196.4	119.7	146.1	184.5	126.3	160.5	123.7	139	208.2	182.2	154.3
Q8IXM2	BAP18	Chromatin complexes subunit BAP18	Homo sapiens	High	2	124.9	210.3	163.9	135.2	155.5	193.1	135.6	136	137.3	141.5	174.9
Q99728	BARD1	BRCA1-associated RING domain protein 1	Homo sapiens	High	2	32.4	31.7	24.8	37	26.8	69.9	24.7	34.1	40.9	37.6	75.7
Q07812	BAX	Apoptosis regulator BAX	Homo sapiens	High	3	184.1	147.8	141.9	183.8	131.5	148.8	103.8	99	192.6	213.7	155.6
Q9NRL2	BAZ1A	Bromodomain adjacent to zinc finger domain protein 1A	Homo sapiens	High	30	1579.2	1362.4	1560.1	1413.5	1382.9	1271.1	1284.8	1303.7	1458.3	1410.5	1211.3
Q9UIG0	BAZ1B	Tyrosine-protein kinase BAZ1B	Homo sapiens	High	52	3853.3	3958.6	3991.8	3717.3	3585.6	3879.4	4026.2	3823.8	3785.2	3691.9	3796.5
Q9UIF9	BAZ2A	Bromodomain adjacent to zinc finger domain protein 2A	Homo sapiens	High	5	207.6	163.7	146.9	140.2	150.9	168.6	172.4	137.5	197.5	189.3	186.5
Q8WY36	BBX	HMG box transcription factor BBX	Homo sapiens	High	2	57	57.5	37.6	45.7	40.4	57.1	44.9	39.8	46	63.4	55.6
Q9UHQ4	BCAP29	B-cell receptor-associated protein 29	Homo sapiens	High	1	31	25.6	23.6	20.5	18.6	14.8	13	10.3	48.1	37	16.3
P51572	BCAP31	B-cell receptor-associated protein 31	Homo sapiens	High	14	1122.5	1094.9	1432	1257.1	1622.2	1298.9	2298.1	2338	1073.8	1103.9	1526
O75934	BCAS2	Pre-mRNA-splicing factor SPF27	Homo sapiens	High	13	985.3	895.9	1050.9	974.7	1065.8	826.3	951.3	958.3	944.6	1015	821
P54687	BCAT1	Branched-chain-amino-acid aminotransferase, cytosolic	Homo sapiens	High	11	1960.8	1351	1298.4	1682.6	1307.4	1238.8	1080.3	1028.5	1762.4	1644.1	1241.8
O15382	BCAT2	Branched-chain-amino-acid aminotransferase, mitochondrial	Homo sapiens	High	10	676.7	710.3	725.3	667.3	792	925.7	1349.1	1309.2	630.2	613.4	1067.5
Q9P287	BCCIP	BRCA2 and CDKN1A-interacting protein	Homo sapiens	High	11	851.3	771.3	793.6	861.6	744.5	739.3	626.5	651.4	819.6	839.3	746.9
Q7Z5W3	BCDIN3D	Pre-miRNA 5'-monophosphate methyltransferase	Homo sapiens	Medium	1	74.4	48	46.6	61	45.5	80.6	31.7	39.7	90.8	62.5	74.5
P06276	BCHE	Cholinesterase	Homo sapiens	High	4	121.8	111.1	121.8	146.6	122.7	139.8	124.3	122.5	137.4	149.2	129.7
P12694	BCKDHA	2-oxoisovalerate dehydrogenase subunit alpha, mitochondrial	Homo sapiens	High	14	1020.1	793.7	830.2	1058.7	779.7	820.5	682.3	624.1	1154.7	1053.1	815.5
P21953	BCKDHB	2-oxoisovalerate dehydrogenase subunit beta, mitochondrial	Homo sapiens	High	5	256.9	268.5	212.8	239.3	171.2	290.6	233.3	236.2	235.8	300.7	305.5
O14874	BCKDK	[3-methyl-2-oxobutanoate dehydrogenase [lipoamide]] kinase, mitochondrial	Homo sapiens	High	3	214.4	144.4	194.3	236.6	178.3	137.6	114.3	131.1	266.8	252.8	138.5
O95999	BCL10	B-cell lymphoma/leukemia 10	Homo sapiens	High	3	124.4	110.3	95.4	127.7	102.5	112.8	69.4	70.5	133.4	129.9	93.4
Q9C0K0	BCL11B	B-cell lymphoma/leukemia 11B	Homo sapiens	High	11	975.8	636.4	682.3	708.7	611.4	465	506.1	470.3	800.9	757.5	450.9
P10415	BCL2	Apoptosis regulator Bcl-2	Homo sapiens	High	1	66.4	40.9	41.9	58.6	39.1	52.3	28.3	29.3	68.4	55.5	41.6
Q07817	BCL2L1	Bcl-2-like protein 1	Homo sapiens	High	1	32.2	42.3	51.4	39.8	48.5	43.7	45.4	49	33.9	29.3	36
Q9HB09	BCL2L12	Bcl-2-like protein 12	Homo sapiens	High	2	46.2	53.6	89.8	124.5	79.4	92.8	81.9	89.7	111.8	78.6	91.5
Q9BXK5	BCL2L13	Bcl-2-like protein 13	Homo sapiens	High	4	262.8	220.6	210	221	220.8	245	425.2	438.1	252.9	225.5	265.6
Q4VC05-2	BCL7A	Isoform 2 of B-cell CLL/lymphoma 7 protein family member A	Homo sapiens	High	1	27.3	40.5	22.4	25.6	20.5	32.6	21.9	23	30.7	32.3	36.3
Q4VC05	BCL7A	B-cell CLL/lymphoma 7 protein family member A	Homo sapiens	High	1	194.7	286.7	273.1	212.9	263.6	268.7	245	244.9	240.3	308.2	266.2
Q9BQE9	BCL7B	B-cell CLL/lymphoma 7 protein family member B	Homo sapiens	High	1	34.4	88.2	56	58	64.9	75.4	75.6	75	42.6	59.8	73.1
Q8WUZ0	BCL7C	B-cell CLL/lymphoma 7 protein family member C	Homo sapiens	High	1	27.1	42.1	27.2	32.6	23.7	31.9	30.1	40.9	42.1	50.9	32.3
E9PK91	BCLAF1	Bcl-2-associated transcription factor 1	Homo sapiens	High	3	235.5	294	222.8	193.3	279.2	220.3	287.8	272.9	158.5	184.7	181.1
Q9NYF8	BCLAF1	Bcl-2-associated transcription factor 1	Homo sapiens	High	24	1807.4	2231	2495.7	2147.2	2369.4	1642.5	2387.9	2285.2	2019.8	2038.7	1738
Q6W2J9	BCOR	BCL-6 corepressor	Homo sapiens	High	4	156.3	120.9	121.6	118.1	94.9	132.3	99.5	86.3	148	146.7	113
Q5H9F3	BCORL1	BCL-6 corepressor-like protein 1	Homo sapiens	Medium	1	25.8	17.4	32.3	33.2	16.5	27.1	16.4	16.9	33.3	27.9	23.3
P11274	BCR	Breakpoint cluster region protein	Homo sapiens	High	11	452	424.6	534.3	456.1	531.9	431.6	518.2	513.7	436.1	445.8	435.7
Q9Y276	BCS1L	Mitochondrial chaperone BCS1	Homo sapiens	High	6	474.1	269.3	311.2	428.6	280.2	225.9	175.8	169.3	465.2	425.3	239.9
Q02338	BDH1	D-beta-hydroxybutyrate dehydrogenase, mitochondrial	Homo sapiens	High	14	1508.2	1478.8	1496.8	1823	1498	1413.2	1312.4	1259	1745.4	1722.5	1506.5
Q9BUT1	BDH2	3-hydroxybutyrate dehydrogenase type 2	Homo sapiens	High	7	385.1	366.8	338.4	361.5	342	378	372.5	363.7	398.4	344.5	424.8
Q14457	BECN1	Beclin-1	Homo sapiens	High	4	187.1	187.9	157.3	175.7	184.3	156.6	149.2	151.1	180.1	198.9	163.8
Q5T5X7	BEND3	BEN domain-containing protein 3	Homo sapiens	High	6	165.6	122.5	135.3	145.4	123.1	122.6	107.7	110.1	134.3	133.7	131.6
O15155	BET1	BET1 homolog	Homo sapiens	High	2	109.8	128.2	130.2	117.4	154.8	112.9	135.7	141.3	91.3	116.4	110.2
Q9NYM9	BET1L	BET1-like protein	Homo sapiens	High	2	98.6	106.6	98.5	124.8	78.1	130.4	94.5	92.6	120.2	116.7	101.5
Q8TD16	BICD2	Protein bicaudal D homolog 2	Homo sapiens	High	14	537.4	618.7	483	476.6	460.9	562.3	429	416.9	502.4	498.3	556.6
O00499	BIN1	Myc box-dependent-interacting protein 1	Homo sapiens	High	7	228.9	314	289.1	255.3	299.4	360.5	357.3	372.7	238.7	267.6	364.5
Q9UBW5	BIN2	Bridging integrator 2	Homo sapiens	High	8	440.9	428	440.3	474.9	527.8	533.6	437.1	432.3	485.9	487.8	578.7
O15392	BIRC5	Baculoviral IAP repeat-containing protein 5	Homo sapiens	High	1	15	36.8	29.2	28	29.4	34.8	63.5	66.4	17.8	16.8	37.7
Q9NR09	BIRC6	Baculoviral IAP repeat-containing protein 6	Homo sapiens	High	25	1278.3	1078.5	1003	1175.4	1004	951	693.5	707.4	1279.9	1215.9	918
P54132	BLM	Bloom syndrome protein	Homo sapiens	High	6	98.5	71.9	91.2	89.6	87.2	72.2	76	68.8	86.3	109.3	77.1
Q13867	BLMH	Bleomycin hydrolase	Homo sapiens	High	20	2031.5	1593.1	1602.6	1750.4	1617.9	1541.9	1743.7	1879.3	1649.3	1681.8	1602.9
P78537	BLOC1S1	Biogenesis of lysosome-related organelles complex 1 subunit 1	Homo sapiens	High	2	113.1	128.3	117.9	107.5	106	132.6	138.7	156	118.4	105.4	136.1
Q6QNY0	BLOC1S3	Biogenesis of lysosome-related organelles complex 1 subunit 3	Homo sapiens	High	2	173.7	147.2	155.8	179.6	152	107.3	86	79.5	223.3	200.8	119.8
Q9NUP1	BLOC1S4	Biogenesis of lysosome-related organelles complex 1 subunit 4	Homo sapiens	High	2	107.3	85.9	78.7	100.1	78.8	99	63.8	71.6	108.6	98.5	96
Q9UL45	BLOC1S6	Biogenesis of lysosome-related organelles complex 1 subunit 6	Homo sapiens	High	1	10.7	16.8	13.8	14.1	7.9	23.3	16.1	22.1	11.8	10.3	23
P53004	BLVRA	Biliverdin reductase A	Homo sapiens	High	9	516.8	405.7	473.6	490.1	448.9	427	400	406.6	550.9	489.3	429.4
P30043	BLVRB	Flavin reductase (NADPH)	Homo sapiens	High	1	56.1	32.8	44.8	50.2	46.9	67	45.9	55.5	60.7	64.2	61.6
P35226	BMI1	Polycomb complex protein BMI-1	Homo sapiens	High	1	35.1	42.9	48.9	33.2	31.2	43.7	49.3	53.9	39.5	41.1	34.7
Q9NSY1	BMP2K	BMP-2-inducible protein kinase	Homo sapiens	High	9	403.6	331.9	478.8	465.1	457.6	359.3	401.9	451.9	406.4	367.1	396.9
Q14692	BMS1	Ribosome biogenesis protein BMS1 homolog	Homo sapiens	High	20	1491.4	1227.2	1313.9	1304.3	1060.1	1136.1	1010.6	988.2	1531.9	1307.2	1168.3
Q12981	BNIP1	Vesicle transport protein SEC20	Homo sapiens	High	5	189.6	203.2	192	202.8	199.6	336	407.6	402.5	192	187	400.9
Q12982	BNIP2	BCL2/adenovirus E1B 19 kDa protein-interacting protein 2	Homo sapiens	High	2	186.5	119.7	121.6	154.5	128.3	53.8	38.7	32.8	201	100.2	50.5
Q12983	BNIP3	BCL2/adenovirus E1B 19 kDa protein-interacting protein 3	Homo sapiens	High	1	11.3	11.6	23.2	31.7	23.8	15.4	8.1	11.8	53.3	48.5	11.4
Q8NFC6	BOD1L1	Biorientation of chromosomes in cell division protein 1-like 1	Homo sapiens	High	4	95.3	107.4	108.2	122.3	108.3	105.3	128.7	148.9	130.9	119.2	125.4
Q9Y3E2	BOLA1	BolA-like protein 1	Homo sapiens	High	3	83.6	58.2	60	87.7	66.6	84.3	63.8	54.2	135.5	109.7	74.3
Q9H3K6	BOLA2	BolA-like protein 2	Homo sapiens	High	6	668.6	776.9	777.1	803.8	830.9	821.5	917.6	959.9	673	777.3	697.5
Q53S33	BOLA3	BolA-like protein 3	Homo sapiens	High	1	14.2	77.2	31.5	17.2	41	91.7	111.7	109.6	16	9.1	76.8
Q14137	BOP1	Ribosome biogenesis protein BOP1	Homo sapiens	High	25	1686.3	1546	1559.2	1500.2	1441.1	1325.1	1227.7	1231.8	1564.4	1540.5	1339.1
Q96GS4	BORCS6	BLOC-1-related complex subunit 6	Homo sapiens	High	1	91.6	40.7	51	62.8	42.4	31.4	16.3	17.8	51.1	71.4	29
Q96FH0	BORCS8	BLOC-1-related complex subunit 8	Homo sapiens	High	2	74.2	41.9	57.8	85.4	50.2	55.3	30	33.3	88.7	87.6	45.7
P07738	BPGM	Bisphosphoglycerate mutase	Homo sapiens	High	2	86.7	81.2	67.7	80.8	70.4	89.4	58.5	60.6	99	106.7	76.3
Q86WA6	BPHL	Valacyclovir hydrolase	Homo sapiens	High	6	301.6	261.5	323.5	235.7	318.3	332.4	402	371.6	311.8	301.5	337
O95861	BPNT1	3'(2'),5'-bisphosphate nucleotidase 1	Homo sapiens	High	11	1136.8	1010.6	1154.6	1101.3	1256.1	878.8	1014	1085	1040.3	1045.9	888.9
Q12830	BPTF	Nucleosome-remodeling factor subunit BPTF	Homo sapiens	High	15	736.4	660.4	665.8	680.9	602.4	761.5	689.1	716.9	649.3	579.8	748.2
P15056	BRAF	Serine/threonine-protein kinase B-raf	Homo sapiens	High	2	103.5	60.8	52.6	78.9	46.5	61.9	36.3	35.2	90.7	66.1	53.2
Q7Z569	BRAP	BRCA1-associated protein	Homo sapiens	High	3	187.9	210.8	130.2	155.6	131.3	160.4	116.5	111.8	170.4	205.2	185
Q6PJG6	BRAT1	BRCA1-associated ATM activator 1	Homo sapiens	High	6	189.7	194.6	165.5	175.6	144	212.6	150.7	153.5	208.9	209.5	215.9
P38398	BRCA1	Breast cancer type 1 susceptibility protein	Homo sapiens	High	3	30.9	47.1	33.9	30.8	30.1	44.1	38	40.4	35.4	34.3	53.7
P51587	BRCA2	Breast cancer type 2 susceptibility protein	Homo sapiens	High	2	51.8	41.9	30	30.3	31.5	88.3	71.9	58.7	34.8	38.9	58.8
P46736	BRCC3	Lys-63-specific deubiquitinase BRCC36	Homo sapiens	High	5	410	339.1	321.8	350.8	290.6	245.5	204.4	211.3	333	319.7	257.9
O95696	BRD1	Bromodomain-containing protein 1	Homo sapiens	High	8	619.5	452.4	551	541.8	442.7	509.3	396.9	387.7	665.3	629.1	497.2
P25440	BRD2	Bromodomain-containing protein 2	Homo sapiens	High	12	595.8	490.8	540.9	585	532	594.5	575.1	652.4	639.6	593.2	585.5
Q15059	BRD3	Bromodomain-containing protein 3	Homo sapiens	High	5	253.8	218.4	265.1	265.8	309.5	269.6	207.4	207.7	206.6	260.4	273.2
O60885	BRD4	Bromodomain-containing protein 4	Homo sapiens	High	8	844.5	865.6	953.6	1049.2	835.8	964.6	813.7	846.5	1089.6	1001.7	963.1
Q9NPI1	BRD7	Bromodomain-containing protein 7	Homo sapiens	High	5	60	79.5	91.6	87.9	78.1	87	100.2	95.8	76	87.4	95.6
Q9H0E9	BRD8	Bromodomain-containing protein 8	Homo sapiens	High	4	105.5	200.5	100.9	95.6	99.6	217.7	136.2	143.9	108.7	113.1	186.9
Q9H8M2	BRD9	Bromodomain-containing protein 9	Homo sapiens	High	3	120.2	93.9	414.4	198.5	562.8	91.7	610.8	599	227.1	137	102.1
Q9NXR7	BRE	BRCA1-A complex subunit BRE	Homo sapiens	High	8	374.4	380.8	355.9	400	321.5	411.8	305	346.4	405.2	381.5	371.4
Q92994	BRF1	Transcription factor IIIB 90 kDa subunit	Homo sapiens	Medium	1	42.9	58.7	56.2	48.8	52.3	158.6	75.8	83.9	57	50.5	149
Q8WY22	BRI3BP	BRI3-binding protein	Homo sapiens	High	3	387	342.5	648.9	410.7	622.6	470.3	975.9	865.2	484.6	457.5	479.9
Q9BX63	BRIP1	Fanconi anemia group J protein	Homo sapiens	High	2	62.7	76.7	56.7	69.4	47.8	77.7	54.8	57.3	73.7	71.2	65
Q8TDN6	BRIX1	Ribosome biogenesis protein BRX1 homolog	Homo sapiens	High	16	1900.6	1765.1	1826.8	1613.5	1658.3	1676.7	1542.7	1615.4	1633	1538.3	1616.4
Q8WUW1	BRK1	Protein BRICK1	Homo sapiens	High	2	138.4	55.5	94.2	179.9	108.5	100.3	64.2	64.2	217.2	184.7	80.9
Q9HCU9	BRMS1	Breast cancer metastasis-suppressor 1	Homo sapiens	High	7	279.7	200	199.7	237	181.3	237.5	177.2	167.3	244.9	239.9	210.2
Q5VW32	BROX	BRO1 domain-containing protein BROX	Homo sapiens	High	5	184.5	239.7	168	166.1	171.8	263.2	238.5	243.7	162.5	188.2	274.6
P55201	BRPF1	Peregrin	Homo sapiens	High	3	215.3	116.3	159.4	180.3	122.5	133.4	89.5	92.5	201.6	180.4	129
Q9NSI6	BRWD1	Bromodomain and WD repeat-containing protein 1	Homo sapiens	High	1	57.8	68.2	125.3	82.2	133	90.8	138.7	127.7	67.2	55.6	92.7
Q9NW68	BSDC1	BSD domain-containing protein 1	Homo sapiens	High	2	87.3	70.9	65.9	91.5	54.2	90.8	57.3	56.1	94.9	110.7	80.3
P35613	BSG	Basigin	Homo sapiens	High	8	999	1195.3	881.8	891.2	895.6	720.8	738.4	819.4	1043.6	1064.7	675.4
Q10589	BST2	Bone marrow stromal antigen 2	Homo sapiens	High	1	35.7	39	20.2	29.6	23.3	31.8	23.1	26.2	21.7	18.7	26.1
O14981	BTAF1	TATA-binding protein-associated factor 172	Homo sapiens	High	16	904.2	697.8	668.2	843.6	571.8	659.3	434.1	437.6	948.3	811	582.8
Q9BX70	BTBD2	BTB/POZ domain-containing protein 2	Homo sapiens	High	3	195.1	140.6	119.7	146	101.3	170.7	112.3	107.7	188.9	145.3	151.3
P20290	BTF3	Transcription factor BTF3	Homo sapiens	High	11	1181.7	1261	1191.5	1049.7	1334.6	1195.7	1546.4	1638.4	1070.9	1079.4	1241.5
Q96K17	BTF3L4	Transcription factor BTF3 homolog 4	Homo sapiens	High	6	245.9	320.6	319.8	312.9	306.3	383	603.7	551.8	314.4	283.4	396.1
O00478	BTN3A3	Butyrophilin subfamily 3 member A3	Homo sapiens	High	1	32	55.4	42.7	33.6	43.5	59.9	70.6	63.9	32.4	36	67.1
Q9Y297	BTRC	F-box/WD repeat-containing protein 1A	Homo sapiens	High	4	123.6	123.1	107.2	127.5	103	150.9	127.3	110.6	128.5	128.4	145.9
O43683	BUB1	Mitotic checkpoint serine/threonine-protein kinase BUB1	Homo sapiens	High	5	111.9	80.5	105	141.7	105.3	83.4	66.3	70.3	110.6	84.8	90.7
O60566	BUB1B	Mitotic checkpoint serine/threonine-protein kinase BUB1 beta	Homo sapiens	High	7	308.9	258.3	196.7	281.6	173.5	206.3	117.1	136.2	288.3	250.3	173.8
O43684	BUB3	Mitotic checkpoint protein BUB3	Homo sapiens	High	12	1890.6	1624.7	1595.8	1817.2	1613.5	1583.2	1330.8	1273.7	2035.2	2146	1563.2
Q9BRD0	BUD13	BUD13 homolog	Homo sapiens	High	5	198.8	174.8	167.9	173.3	153	192.7	167.5	158.2	203	190.6	195.8
P41223	BUD31	Protein BUD31 homolog	Homo sapiens	High	6	276.4	268.4	234.3	250.3	220.1	258.3	185.1	185.8	255.2	222.8	241.1
Q13895	BYSL	Bystin	Homo sapiens	High	14	1447.3	1261	1290.2	1371.8	1151.5	1165	1029.7	1045.5	1456	1451.7	1141.2
Q7L1Q6	BZW1	Basic leucine zipper and W2 domain-containing protein 1	Homo sapiens	High	21	2196.6	2879.4	2870.4	2577.5	2974.3	2709.4	2841	2939.7	2227.6	2449.8	2666.5
Q9Y6E2	BZW2	Basic leucine zipper and W2 domain-containing protein 2	Homo sapiens	High	24	3158	3455.8	2974.7	3165.8	3162.1	3266.9	3335.7	3412.6	2770.6	2722.8	3265.7
Q8N655	C10orf12	Uncharacterized protein C10orf12	Homo sapiens	High	2	62.6	57.1	49.9	45.2	30.9	54	29.1	35	54.2	79.7	48
Q5T2E6	C10orf76	UPF0668 protein C10orf76	Homo sapiens	High	7	149.2	126.2	125	146.7	106.4	137.8	138	137	154.2	213.3	168
Q9H0W9	C11orf54	Ester hydrolase C11orf54	Homo sapiens	High	2	102.9	41.8	59	55.4	61.9	32.6	25.1	23.3	83.1	85.9	23.9
Q9H3H3	C11orf68	UPF0696 protein C11orf68	Homo sapiens	High	7	167	278.6	232.1	203.6	250.1	380.4	337.8	326.8	209.8	244.7	346
Q9BUA3	C11orf84	Uncharacterized protein C11orf84	Homo sapiens	High	8	230.6	247	274.8	249.2	301.2	274.6	231.9	226.8	304.1	291.9	261.1
E9PRG8	C11orf98	Uncharacterized protein C11orf98	Homo sapiens	High	2	80.7	63.1	54.6	74.3	46.6	68.6	53.1	39.4	69.6	78.2	80.3
Q9HB07	C12orf10	UPF0160 protein MYG1, mitochondrial	Homo sapiens	High	17	1558	1285.2	1149.5	1412.6	1151	1351.3	984.3	1050	1483.3	1564.8	1295
Q8N999	C12orf29	Uncharacterized protein C12orf29	Homo sapiens	High	2	100.4	109.9	109.1	94.3	105.8	102.6	132.8	118.7	102.1	118.5	100.3
Q96C57	C12orf43	Uncharacterized protein C12orf43	Homo sapiens	High	5	255.3	254	215.8	244.8	191	254	189.2	198.5	309.4	298.3	226.9
Q8N5I9	C12orf45	Uncharacterized protein C12orf45	Homo sapiens	High	4	173	171.4	147.5	181.3	149.6	123.6	113.5	118.3	169.8	163.7	130.4
Q99622	C12orf57	Protein C10	Homo sapiens	High	2	144.4	82.9	133.4	150.2	131.6	115.1	108.7	109.9	150.9	160	78.9
Q9UKR5	C14orf1	Probable ergosterol biosynthetic protein 28	Homo sapiens	High	1	30.6	21.4	66.7	41.7	56.3	26.3	35	39.4	45.9	12.2	15.8
Q9BXV9	C14orf142	Uncharacterized protein C14orf142	Homo sapiens	High	1	65.3	45.3	49.8	67.9	45.1	71.4	50.4	63	64.7	76.7	74.1
Q7Z3D6	C14orf159	UPF0317 protein C14orf159, mitochondrial	Homo sapiens	High	3	271.2	179.3	272.2	197.5	266.7	211.3	224.9	192.5	242.1	222.1	249.4
Q9Y224	C14orf166	UPF0568 protein C14orf166	Homo sapiens	High	18	2234.8	2393	2476.3	2222.9	2535.9	2241.9	2103.7	2290.9	2192.4	2230.5	2067.8
Q86SX3	C14orf80	Uncharacterized protein C14orf80	Homo sapiens	High	2	95.7	36.2	22.2	48.6	23.2	27.4	24.3	24.6	215.7	148.6	41.2
Q9Y2V0	C15orf41	Uncharacterized protein C15orf41	Homo sapiens	High	2	51.6	44.9	31.7	44	37	41.6	32	33.4	35	39.8	43.5
Q96S19	C16orf13	UPF0585 protein C16orf13	Homo sapiens	High	6	396.2	296.7	396.3	407.3	335.4	361.9	259	313.1	494.4	456.3	300.1
Q96GQ5	C16orf58	RUS1 family protein C16orf58	Homo sapiens	High	7	228.8	265	331	312.2	313.8	308.2	358	339.7	267.1	300.5	343.5
Q7Z3J2	C16orf62	UPF0505 protein C16orf62	Homo sapiens	High	6	153.5	142.3	132.7	154.6	122.3	188.3	121.5	117.2	160.5	156.3	178.3
Q6PH81	C16orf87	UPF0547 protein C16orf87	Homo sapiens	High	2	39.8	44	38.1	37.3	30.7	56.9	51.1	51.9	29.5	32.7	56.4
Q9BQA9	C17orf62	Uncharacterized protein C17orf62	Homo sapiens	High	3	151.2	95.8	144.7	135.5	132.7	93.6	108.4	104.9	144.6	147.6	99.4
Q9HAS0	C17orf75	Protein Njmu-R1	Homo sapiens	High	3	403.5	363.7	325.8	372.9	333.7	328.5	245.8	260.1	366.7	362.8	328.9
Q96B23	C18orf25	Uncharacterized protein C18orf25	Homo sapiens	High	1	13.7	17.6	13	11	15.1	31.7	15	18.1	16.3	13.9	35.8
Q96DM3	C18orf8	Uncharacterized protein C18orf8	Homo sapiens	High	6	262.2	181.8	205.9	228.6	190.3	221.1	180.8	199.1	220	208.2	205.1
Q9UFG5	C19orf25	UPF0449 protein C19orf25	Homo sapiens	High	2	56	66.3	39.9	51.9	37	53.7	31.7	33.3	60.2	52.4	60.7
Q9BQ61	C19orf43	Uncharacterized protein C19orf43	Homo sapiens	Medium	2	47.2	107	85.4	68.3	86.5	82.1	74.4	70.1	75	63.4	94.3
Q8N9M1	C19orf47	Uncharacterized protein C19orf47	Homo sapiens	High	1	39	53.8	43.1	45.6	38.7	70.9	52.9	55.5	37.5	36.9	73.9
Q9BSF4	C19orf52	Uncharacterized protein C19orf52	Homo sapiens	High	5	310.3	249.2	268.1	344.3	264.2	207.1	185.3	181.5	367.3	369.8	243.2
Q9UNZ5	C19orf53	Leydig cell tumor 10 kDa protein homolog	Homo sapiens	High	4	414.1	387.5	474.5	403.7	442	418.2	645.5	717	445.2	486.8	386.9
Q9NS00	C1GALT1	Glycoprotein-N-acetylgalactosamine 3-beta-galactosyltransferase 1	Homo sapiens	High	3	70.7	53.2	85.5	78.3	68	71.9	66.7	69.4	74.8	59	72.1
Q9NSG2	C1orf112	Uncharacterized protein C1orf112	Homo sapiens	High	2	69.5	63.8	56.2	58.3	46.3	93.2	57.1	54.1	78.1	70	85.4
Q6ZSJ8	C1orf122	Uncharacterized protein C1orf122	Homo sapiens	High	1	46.7	43.3	47.6	44.9	31.8	30.4	19.7	14.4	53.3	56.9	29.3
Q9NWV4	C1orf123	UPF0587 protein C1orf123	Homo sapiens	High	5	252.7	189	168.1	229.4	154.2	193.7	145.6	150.7	253.1	253.7	174.4
Q8NDD1	C1orf131	Uncharacterized protein C1orf131	Homo sapiens	High	4	131.1	164.8	131.3	120.7	115.6	153.5	148.2	158.3	131.7	141.9	174.5
Q8IYL3	C1orf174	UPF0688 protein C1orf174	Homo sapiens	Medium	1	19.2	14.7	13	27.1	17.8	34.1	27	30.4	20.1	11.5	30.6
Q9BV19	C1orf50	Uncharacterized protein C1orf50	Homo sapiens	High	2	70	43.4	47.5	70	46.4	64	56	53.5	74.8	80	67
Q8N6N3	C1orf52	UPF0690 protein C1orf52	Homo sapiens	High	3	254.2	182.7	176	208.5	190	210.5	143.2	142.7	200.8	154.8	206.8
Q07021	C1QBP	Complement component 1 Q subcomponent-binding protein, mitochondrial	Homo sapiens	High	12	866.7	1599.9	1288.5	1089.9	1385.5	1821.3	2030.2	2220.8	866.4	882.2	1905
Q9BUV8	C20orf24	Uncharacterized protein C20orf24	Homo sapiens	Medium	1	30.2	31.2	36.5	21	38.6	37.6	30.8	34.2	22.2	17	30.4
Q9GZN8	C20orf27	UPF0687 protein C20orf27	Homo sapiens	High	7	488.3	419.4	487.6	446.3	551.8	179.6	184.1	177.8	424.9	505.8	187.5
P30042	C21orf33	ES1 protein homolog, mitochondrial	Homo sapiens	High	8	407	505.3	546.9	508	571.6	439.1	600.8	515.1	482.9	505.3	534
P57076	C21orf59	UPF0769 protein C21orf59	Homo sapiens	High	7	362.9	234.2	280.6	288.7	290.8	309	281	279.6	297.9	276.7	277.5
Q9BZE7	C22orf23	UPF0193 protein EVG1	Homo sapiens	Medium	1	49.6	27.8	33.7	42.6	26.6	26.8	10.6	8.6	46.5	57.7	32
Q86YS7	C2CD5	C2 domain-containing protein 5	Homo sapiens	High	9	435.3	424.9	381.5	383.9	375.6	653.1	818.9	863.8	434.2	421.7	703.1
Q8WWC4	C2orf47	m-AAA protease-interacting protein 1, mitochondrial	Homo sapiens	High	5	95.1	71.7	82.2	83.4	61.1	77.7	59.6	52.6	81.3	79.8	71.5
Q9BVC5	C2orf49	Ashwin	Homo sapiens	High	3	136.4	124	144.7	133.5	122.2	136.5	114.7	139.4	135.7	132	121.8
Q8N8R5	C2orf69	UPF0565 protein C2orf69	Homo sapiens	High	2	93.5	91	84	94.7	84.3	75.3	83.6	69.4	96	102.5	80.3
Q3KRA6	C2orf76	UPF0538 protein C2orf76	Homo sapiens	High	2	13.6	21.2	20.2	17.5	10.8	39.7	26.6	27.6	14.8	12.5	31
P01024	C3	Complement C3	Homo sapiens	High	1	8.7	7.8	36	24.7	38.9	5.5	17.2	15	38.4	33.5	9.4
Q5JPI3	C3orf38	Uncharacterized protein C3orf38	Homo sapiens	High	4	144	170.3	111.3	116.8	108.1	200.9	124.9	112.5	151.3	146.5	188.9
Q8NDZ4	C3orf58	Deleted in autism protein 1	Homo sapiens	High	4	99.8	117.4	117.1	99.9	97.2	114.1	124.2	115.7	97.3	110.1	111.9
Q8N1A6	C4orf33	UPF0462 protein C4orf33	Homo sapiens	Medium	1	34.5	29.8	24.5	37.2	39.1	34.8	35.1	36.8	39.9	42.4	31.6
Q49AR2	C5orf22	UPF0489 protein C5orf22	Homo sapiens	High	5	46.7	27.2	26.5	37.9	25.1	34.9	15.2	22.1	40.5	40.5	19.6
Q7Z6I8	C5orf24	UPF0461 protein C5orf24	Homo sapiens	High	1	15.6	23.3	15.6	18.4	15.3	13.2	11.8	7.9	18.4	19.9	13.2
A6NDU8	C5orf51	UPF0600 protein C5orf51	Homo sapiens	High	3	175.5	123.4	138.7	151.3	138.1	106.8	104.3	103.2	172.4	126.3	93.7
Q7Z4R8	C6orf120	UPF0669 protein C6orf120	Homo sapiens	High	1	28.3	43	48.1	38.5	43.4	25.9	29.9	26	29.3	37.6	17.2
Q9P0P8	C6orf203	Uncharacterized protein C6orf203	Homo sapiens	High	2	121	182	140.5	151.7	155.2	244.9	203.6	224.5	102.2	97.5	226.4
O95873	C6orf47	Uncharacterized protein C6orf47	Homo sapiens	High	1	25	20.8	19.8	29.1	21.1	25.2	16.1	17.4	32.3	40.5	30.3
Q9BPX7	C7orf25	UPF0415 protein C7orf25	Homo sapiens	High	2	113.1	146.5	96.6	93.2	100.7	202.9	170.3	202.2	76.6	83.8	216.2
Q9BRJ6	C7orf50	Uncharacterized protein C7orf50	Homo sapiens	High	3	152.7	99.1	40.5	84.3	45.4	63.7	20	13.4	62.5	87.7	63.2
Q9H7E9	C8orf33	UPF0488 protein C8orf33	Homo sapiens	High	1	76.2	38.8	44.6	56.8	41.8	51.4	38.6	42.7	62.9	57.5	57.2
Q6P1X6	C8orf82	UPF0598 protein C8orf82	Homo sapiens	High	4	147.3	97	101.6	130	82.1	99.7	93.8	94.9	105	113.1	99.5
Q5T280	C9orf114	Putative methyltransferase C9orf114	Homo sapiens	High	9	439.6	383.8	283.1	414.9	279.2	370.3	276.3	258.3	394.6	444.6	354.6
Q9BUH6	C9orf142	Protein PAXX	Homo sapiens	High	3	139.1	161	140.1	176.3	126.5	155.3	109.8	100.5	186.1	198.9	165.9
Q9BUW7	C9orf16	UPF0184 protein C9orf16	Homo sapiens	High	1	50.1	23.1	28.6	51.3	27	27.4	20.7	16.3	53.9	46.9	24.2
Q8IXQ3	C9orf40	Uncharacterized protein C9orf40	Homo sapiens	High	3	13.7	23	10.5	5.5	6.9	23.1	12.2	12.5	10.6	20.8	18.7
Q5T6V5	C9orf64	UPF0553 protein C9orf64	Homo sapiens	High	11	656.4	713	639.5	689.8	663.6	1155.7	740.7	741.7	668.9	654.3	1104.5
Q9NZ63	C9orf78	Uncharacterized protein C9orf78	Homo sapiens	High	13	763.4	853.3	718	719.5	755.4	627.2	579.4	648.5	712.1	671.7	582.7
P35219	CA8	Carbonic anhydrase-related protein	Homo sapiens	High	2	31.3	23.6	25.1	40	21.7	18.4	11	12.8	28.3	32.2	17.7
Q16790	CA9	Carbonic anhydrase 9	Homo sapiens	High	2	12.4	10.3	16.8	18.4	13.4	12.4	17.6	13.5	22.6	24.1	19.6
Q9Y376	CAB39	Calcium-binding protein 39	Homo sapiens	High	18	1566.9	1281.7	1604.1	1674.8	1563.5	1486.3	1520.9	1569.1	1509.7	1487.4	1418.8
Q9Y6J0	CABIN1	Calcineurin-binding protein cabin-1	Homo sapiens	High	6	302.4	273.9	241.5	288	237.1	242.4	178	187.5	297.9	273.4	244.4
Q8WUQ7	CACTIN	Cactin	Homo sapiens	High	5	175.8	158.2	163.4	134.2	178.9	192	199.3	199.2	192.7	175.9	162.8
Q86Y37	CACUL1	CDK2-associated and cullin domain-containing protein 1	Homo sapiens	High	5	228.4	217.5	246.2	241.4	265.9	257.9	267.5	323.7	204.4	223.6	249.5
Q9HB71	CACYBP	Calcyclin-binding protein	Homo sapiens	High	19	1576.7	3279.4	2296.8	1799.9	2764	3216	3280.8	3710	1372.5	1538	3095.6
P27708	CAD	CAD protein	Homo sapiens	High	74	7347.1	6905.1	5687.9	6490.8	5398.8	5840.5	4912.9	4987.9	6849.9	7008.4	5774.8
Q13137	CALCOCO2	Calcium-binding and coiled-coil domain-containing protein 2	Homo sapiens	High	2	45.9	57.1	44.6	42.7	39.5	58.4	55.3	52.6	45.1	43.9	49.1
P62158	CALM1	Calmodulin	Homo sapiens	High	4	87.9	197.9	121.4	154.6	73.3	147.9	158.2	178.7	114	90.2	98.6
P27797	CALR	Calreticulin	Homo sapiens	High	27	3546.5	4744.6	5343.2	3156.9	5433.7	5658.3	7986.1	7672.5	3780.9	3751.3	5362.7
O43852	CALU	Calumenin	Homo sapiens	High	18	1472.2	1938.1	2117.2	1882.7	1684.6	2040.3	2258.7	2220.6	2015.7	1739.3	2005
Q8IU85	CAMK1D	Calcium/calmodulin-dependent protein kinase type 1D	Homo sapiens	High	1	32.5	11.4	16.6	25.2	19.5	22.9	14.9	16.4	33.7	30.6	18.7
Q13557	CAMK2D	Calcium/calmodulin-dependent protein kinase type II subunit delta	Homo sapiens	High	4	416.1	254.5	341	383.6	274.2	273.4	172.4	183.3	439.2	335.1	248.5
Q13555	CAMK2G	Calcium/calmodulin-dependent protein kinase type II subunit gamma	Homo sapiens	High	4	507.3	484.5	534.9	548.3	516.3	486.5	607.7	602.9	558.1	528.8	528.5
Q8NCB2	CAMKV	CaM kinase-like vesicle-associated protein	Homo sapiens	High	1	64.7	54.1	46.6	50.7	44.9	55.2	43.5	37	52.7	48.9	51.2
P49069	CAMLG	Calcium signal-modulating cyclophilin ligand	Homo sapiens	High	2	55.2	36.5	31.9	43.8	34.8	28	34.8	35.7	53	33.9	43
Q5T5Y3	CAMSAP1	Calmodulin-regulated spectrin-associated protein 1	Homo sapiens	High	4	254.4	202.1	232.9	224.7	214.9	179.2	213.9	221.7	260.9	303.8	181.7
Q86VP6	CAND1	Cullin-associated NEDD8-dissociated protein 1	Homo sapiens	High	49	4950.8	5719.6	5055.2	5109.2	4947.6	5077.7	4223.2	4250.7	4899	4930.6	5137.9
Q8WVQ1	CANT1	Soluble calcium-activated nucleotidase 1	Homo sapiens	High	9	303.3	366.2	354.2	369	354.5	408.6	388	371.3	347.4	342.7	390.3
P27824	CANX	Calnexin	Homo sapiens	High	28	2468	3778.9	3668.4	2948.7	3469.7	4085.8	5039.3	4519.5	2848.7	2680	4364.4
Q01518	CAP1	Adenylyl cyclase-associated protein 1	Homo sapiens	High	27	3257.6	3211.2	3841.5	3563.2	4331.1	3173.3	3820.4	3880.2	3562.9	4013.9	3349.3
P40121	CAPG	Macrophage-capping protein	Homo sapiens	High	3	243	219.6	262	299	262.5	154.4	149.4	151.1	344.5	357.4	166.6
P07384	CAPN1	Calpain-1 catalytic subunit	Homo sapiens	High	27	1888.4	1718.8	1856.6	2087.9	1911.7	1939.4	1712.7	1797.8	2266.6	2202.2	2050.4
Q9UMQ6	CAPN11	Calpain-11	Homo sapiens	Medium	1	14.3	27.1	20.9	15.2	26.4	91.1	56.3	56	10.4	13.1	123
Q9Y6W3	CAPN7	Calpain-7	Homo sapiens	High	3	116.9	117.3	105.3	113.9	114	153.8	132.9	144.5	107.5	100.6	140.6
P04632	CAPNS1	Calpain small subunit 1	Homo sapiens	High	12	601.2	640	760.7	676.9	838.7	646.6	635.6	673.3	617.7	615.7	632
Q14444	CAPRIN1	Caprin-1	Homo sapiens	High	18	2136.8	2765.4	2027.3	2201.6	2251.5	2628.7	2481.5	2478.4	1899.1	1846.3	2312.5
P52907	CAPZA1	F-actin-capping protein subunit alpha-1	Homo sapiens	High	10	1386.6	1470.8	1534.9	1387.5	1624.4	1313.9	1248.2	1242.1	1534.7	1447.2	1259.2
P47755	CAPZA2	F-actin-capping protein subunit alpha-2	Homo sapiens	High	7	507.6	570.4	492.8	532.4	578.6	696.8	590.7	530.8	466.3	520.1	613.1
B1AK88	CAPZB	Capping protein (Actin filament) muscle Z-line, beta, isoform CRA_d	Homo sapiens	High	4	309.1	366.8	358.6	389.8	339.8	355.5	343.9	311.1	416.9	454.5	343.7
P47756	CAPZB	F-actin-capping protein subunit beta	Homo sapiens	High	16	1645.4	1998.1	1829.8	1751.3	1993.4	1830.4	1666.1	1754.1	1642.4	1729.9	1776.7
Q9Y2G2	CARD8	Caspase recruitment domain-containing protein 8	Homo sapiens	High	3	117.7	72.1	97.3	100.4	95.1	89.5	67.5	75.5	95.3	94.6	84.1
Q9Y2V2	CARHSP1	Calcium-regulated heat-stable protein 1	Homo sapiens	High	4	350.2	310.1	412.3	338.7	374.6	371.7	427.2	455	343.4	392.2	343.5
Q86X55	CARM1	Histone-arginine methyltransferase CARM1	Homo sapiens	High	15	1121.3	809.9	1044.4	1104.9	1043.6	650.9	634.2	635.9	1130.8	1120	679.1
Q6F5E8	CARMIL2	Capping protein, Arp2/3 and myosin-I linker protein 2	Homo sapiens	High	11	378.1	299.5	306.7	317.2	280.3	286.4	279.7	272	378.7	338.3	312.4
Q8N4J0	CARNMT1	Carnosine N-methyltransferase	Homo sapiens	High	4	262.6	192.1	208.4	248.7	225.1	229.8	220.5	259.4	268.7	225.7	235.5
P49589-3	CARS	Isoform 3 of Cysteine--tRNA ligase, cytoplasmic	Homo sapiens	Medium	2	79.4	91.1	71.3	80.5	64.2	86.7	69	68	100	89.8	75.1
P49589	CARS	Cysteine--tRNA ligase, cytoplasmic	Homo sapiens	High	27	1806.3	1741.3	1657.2	1370.6	1670.6	1844.1	1685.8	1758.5	1817.9	1703.3	1812.2
Q9HA77	CARS2	Probable cysteine--tRNA ligase, mitochondrial	Homo sapiens	High	8	381.1	306.3	306	410.5	316.4	390.2	275.3	265.1	475.2	380.1	448.2
O15234	CASC3	Protein CASC3	Homo sapiens	High	3	354.6	177	183.9	263	155.8	139.9	75.2	75.3	254.2	212.4	148.4
Q6P4E1	CASC4	Protein CASC4	Homo sapiens	High	1	38.4	24.8	44.6	41.1	35.2	43.2	19.7	25.5	41.5	43.9	42.3
Q8NG31	CASC5	Protein CASC5	Homo sapiens	High	7	247.8	204.6	196.1	209.8	188	184.4	147.7	156.6	190.7	211.9	206.2
P31944	CASP14	Caspase-14	Homo sapiens	High	2	86.6	112.3	77.2	128.3	93.5	105.8	112.3	122.2	62.5	60	126.3
P42575	CASP2	Caspase-2	Homo sapiens	High	7	832.4	687.9	574.3	627.5	536.5	552.9	434.7	421.2	660.5	620.4	497.2
P42574	CASP3	Caspase-3	Homo sapiens	High	10	1657.9	1035.1	1000.6	1287.1	991.9	1123.9	1035.1	1062.7	1340.6	1280.2	1097.1
P55212	CASP6	Caspase-6	Homo sapiens	High	10	1205.7	848.9	1007.7	867.7	1019.9	795	821.1	877.3	1076.6	999	720.2
P55210	CASP7	Caspase-7	Homo sapiens	High	6	204.8	296.9	279.2	242	266.2	312.2	340.3	364.6	217.9	201.4	310.7
Q14790	CASP8	Caspase-8	Homo sapiens	High	7	499.8	428.2	451.3	508.4	451.3	436.6	350.3	365.7	521.9	496.7	439.2
Q9UKL3	CASP8AP2	CASP8-associated protein 2	Homo sapiens	High	3	181.9	119.9	90.4	110.9	82.7	220.9	80.3	106.3	140.8	119	197.3
O43439	CBFA2T2	Protein CBFA2T2	Homo sapiens	High	1	62.1	43.6	50.1	65.6	43.7	57.8	41.9	33.3	70.5	74.3	45
O75081	CBFA2T3	Protein CBFA2T3	Homo sapiens	High	2	46	55.7	38.7	52.6	38	50.9	25.1	28.3	63.5	64.5	48.4
Q13951-2	CBFB	Isoform 2 of Core-binding factor subunit beta	Homo sapiens	High	3	55.6	69.9	54.3	39.5	59	63.1	66.1	71.3	34.4	45.2	52.8
Q13951	CBFB	Core-binding factor subunit beta	Homo sapiens	High	12	1086.5	1074.1	863.2	1016.7	876.8	1021.9	680.1	694	1040.5	1028.2	800.6
P22681	CBL	E3 ubiquitin-protein ligase CBL	Homo sapiens	High	11	1031.4	899.3	896.5	1095.7	870.7	1092.2	749.3	770.9	1236.1	1171.5	1053.2
Q75N03	CBLL1	E3 ubiquitin-protein ligase Hakai	Homo sapiens	High	3	57.8	64.6	69.9	66.7	49.6	59.3	62.7	65.7	69.9	72.2	67.6
Q8N4T8	CBR4	Carbonyl reductase family member 4	Homo sapiens	High	5	314.1	285.4	305	343.7	285.6	326.9	361.7	320.7	378.6	335.8	371.4
Q4V339	CBWD6	COBW domain-containing protein 6	Homo sapiens	High	4	175.1	116.9	130.3	189.1	123.9	118.5	95.1	92.9	200.9	162.6	105.9
P83916	CBX1	Chromobox protein homolog 1	Homo sapiens	High	9	764.3	1060.8	881.8	743.2	992	1127.1	1240.9	1428.1	664	718.3	1050.7
Q14781	CBX2	Chromobox protein homolog 2	Homo sapiens	High	3	202.3	226.8	315.9	247.3	294.6	331.1	296.4	293.9	233.2	188.2	329.6
Q13185	CBX3	Chromobox protein homolog 3	Homo sapiens	High	11	1923.4	2655.9	2405.5	2044.9	2723.1	2835.4	3286.1	3246.5	1648.8	2034	3029
O00257	CBX4	E3 SUMO-protein ligase CBX4	Homo sapiens	High	6	258.9	218.3	237.2	220	222.9	251	185.5	185	246	223.1	211.9
P45973	CBX5	Chromobox protein homolog 5	Homo sapiens	High	13	1123.1	2034.4	1965.3	1453.5	1773.4	1984.6	2528.3	2437.2	1329.9	1453.8	2089.5
Q9HC52	CBX8	Chromobox protein homolog 8	Homo sapiens	High	11	543.8	452.1	508.2	531.7	451.4	443.6	408.5	365.2	590	524.3	452.4
Q6P1N0	CC2D1A	Coiled-coil and C2 domain-containing protein 1A	Homo sapiens	High	13	391.2	336.9	324.2	377.4	284	388.8	269	269.6	407.7	388.3	360.1
Q5T0F9	CC2D1B	Coiled-coil and C2 domain-containing protein 1B	Homo sapiens	High	4	160.9	139.9	151	154.7	159.5	143.3	165.7	176.5	147.7	161.1	148.5
Q8IX12	CCAR1	Cell division cycle and apoptosis regulator protein 1	Homo sapiens	High	23	943.5	1197.2	1154.9	1123.6	1101.6	1186.4	1425.4	1623.1	1075.4	1136.9	1180.6
Q8N163	CCAR2	Cell cycle and apoptosis regulator protein 2	Homo sapiens	High	33	2513	2502.9	2491	2350.8	2465.5	2592.1	2553.6	2649.9	2820.1	2532.4	2513.3
Q96NT0	CCDC115	Coiled-coil domain-containing protein 115	Homo sapiens	High	3	69.7	65.5	68.5	90.3	77.9	74.6	59.2	62.5	76.2	96.8	78.8
Q8IWD4	CCDC117	Coiled-coil domain-containing protein 117	Homo sapiens	High	2	108.1	113.3	131.3	123.2	108.5	132.6	122.7	150	112.9	90.1	131.4
Q8WUD4	CCDC12	Coiled-coil domain-containing protein 12	Homo sapiens	High	3	223	173.3	167.5	222.4	172.8	152.2	141.5	154	248.5	251.1	158.6
Q96CT7	CCDC124	Coiled-coil domain-containing protein 124	Homo sapiens	High	14	1126.5	882.5	780.5	783.1	755.7	883.2	621.4	664	1082.8	1071	860.1
Q96BQ5	CCDC127	Coiled-coil domain-containing protein 127	Homo sapiens	High	1	104.3	74.4	96.4	97.2	115.4	106	116	117.6	89.2	87	111.5
Q9H6E4	CCDC134	Coiled-coil domain-containing protein 134	Homo sapiens	High	5	262.3	315.1	335.8	322.5	346.7	401.2	530.2	512.1	261.3	276.2	444.6
Q6PK04	CCDC137	Coiled-coil domain-containing protein 137	Homo sapiens	High	4	513.6	453	370.9	399.7	360.6	417.4	418.6	413	477.3	469.8	390.8
Q96M89	CCDC138	Coiled-coil domain-containing protein 138	Homo sapiens	Medium	1	38.6	25.7	13.5	23.6	13.4	12.2	9.3	8.2	24.7	17.1	14.9
Q49A88	CCDC14	Coiled-coil domain-containing protein 14	Homo sapiens	Medium	1	28.3	33.5	21	23.7	23	21.5	30.5	28.6	16.2	24.3	27.1
Q9P0B6	CCDC167	Coiled-coil domain-containing protein 167	Homo sapiens	High	1	155.2	221.2	180.5	165.4	200.8	308.1	254.4	284.7	136.5	154.1	242
Q7Z3E2	CCDC186	Coiled-coil domain-containing protein 186	Homo sapiens	Medium	1	38.9	45.5	42.5	51	45.6	52.5	52	50.7	38	43.5	45
O60826	CCDC22	Coiled-coil domain-containing protein 22	Homo sapiens	High	10	348.5	437.3	321.2	345.9	322.3	362.8	327.4	370.4	404	396.7	379.9
Q86WR0	CCDC25	Coiled-coil domain-containing protein 25	Homo sapiens	High	10	799.4	654.7	708.4	777.4	630	555.2	589	574.9	800.2	748.6	643.2
Q9BUN5	CCDC28B	Coiled-coil domain-containing protein 28B	Homo sapiens	High	2	60.3	31.7	29.2	52.5	34.9	23.4	17.4	19.6	52.9	46.6	24.4
Q96MW1	CCDC43	Coiled-coil domain-containing protein 43	Homo sapiens	High	6	173.9	330.8	256.8	197.3	279.5	332.5	340	328.2	169	169.9	367.1
Q96A33	CCDC47	Coiled-coil domain-containing protein 47	Homo sapiens	High	13	932.1	814.4	939.7	946.4	854.4	629.3	747.6	766.3	841.5	807.2	702.5
Q96ER9	CCDC51	Coiled-coil domain-containing protein 51	Homo sapiens	High	4	241.1	134.3	174.8	224.8	165.2	164.8	129.3	135.4	240.6	201.5	148.6
Q9Y3C0	CCDC53	WASH complex subunit CCDC53	Homo sapiens	Medium	1	154.6	131.5	133.4	187.5	140.5	155.3	109.3	102.2	209.8	226.7	146
Q4VC31	CCDC58	Coiled-coil domain-containing protein 58	Homo sapiens	High	5	430.7	407.2	480	465	381.7	469.9	501.5	461.6	399.1	422.7	418.9
Q9P031	CCDC59	Thyroid transcription factor 1-associated protein 26	Homo sapiens	High	3	201.1	132.7	134.5	152	137.9	146.2	99.2	110.9	166.5	184.4	139.7
Q16204	CCDC6	Coiled-coil domain-containing protein 6	Homo sapiens	High	15	890.8	935.5	837.5	844.2	837.6	969.2	817.4	787.9	956.3	966.5	892
Q9BR77	CCDC77	Coiled-coil domain-containing protein 77	Homo sapiens	High	3	79.1	73.8	295.1	160.4	93.8	145.7	145.7	115.6	360.3	367.8	156.2
Q8N4S0	CCDC82	Coiled-coil domain-containing protein 82	Homo sapiens	High	2	67.7	42.9	34.7	55.8	43.5	56.1	30.5	33.4	58.9	75.3	53.2
A6NKD9	CCDC85C	Coiled-coil domain-containing protein 85C	Homo sapiens	High	7	457.4	344.3	319.7	375	306.5	300.5	225.9	248.2	424.7	297.8	290.3
Q9H6F5	CCDC86	Coiled-coil domain-containing protein 86	Homo sapiens	High	11	809.8	683	724.5	638.8	650.6	650.2	686	688.7	650.4	598.7	639.5
Q3V6T2	CCDC88A	Girdin	Homo sapiens	High	6	279	213.3	241.7	185.9	237.5	217	202.4	234.4	238	223.5	212.4
Q9P219	CCDC88C	Protein Daple	Homo sapiens	High	8	253	288.1	212.8	214.6	219.9	292.8	344.1	338.4	217.6	224.9	317.4
Q9GZT6	CCDC90B	Coiled-coil domain-containing protein 90B, mitochondrial	Homo sapiens	High	3	123.4	105.7	109.6	142.2	114.4	123.5	117.2	111.3	154.9	164	147.8
Q7Z6B0	CCDC91	Coiled-coil domain-containing protein 91	Homo sapiens	High	2	44.2	45.9	57.3	37.8	70.6	48.4	53.4	48.9	35.8	29.3	47.7
Q567U6	CCDC93	Coiled-coil domain-containing protein 93	Homo sapiens	High	13	300.7	339.8	291.5	305.4	305	382.1	293.3	277.2	335.7	334.4	357.5
Q9BW85	CCDC94	Coiled-coil domain-containing protein 94	Homo sapiens	High	12	333.8	408.2	288.4	311.1	296.3	409	309.2	323.7	301.7	307.1	381.7
Q96F63	CCDC97	Coiled-coil domain-containing protein 97	Homo sapiens	High	6	148.8	133.6	102.8	131.1	101.4	162.5	102.6	117.4	139.4	155.7	188.7
Q9BSQ5	CCM2	Cerebral cavernous malformations 2 protein	Homo sapiens	High	5	181.9	135.1	146.4	178.6	145.2	174.4	118.6	149.9	212.6	221.2	171.1
P20248	CCNA2	Cyclin-A2	Homo sapiens	High	9	338.9	336.2	260.4	343.8	258.8	306.2	185.9	191.1	389.3	352.7	256.5
P14635	CCNB1	G2/mitotic-specific cyclin-B1	Homo sapiens	High	3	178.9	198.2	164.9	206.1	156.4	128.2	125.2	113.5	164.9	129.9	138
O95067	CCNB2	G2/mitotic-specific cyclin-B2	Homo sapiens	High	3	174.4	120.2	127.2	164.5	105.9	85.1	54.1	58.8	167.5	146.9	91.3
P24863	CCNC	Cyclin-C	Homo sapiens	High	3	105.3	118.9	134.3	117	112	125.2	118.1	123.1	110	89.1	139.2
P30281	CCND3	G1/S-specific cyclin-D3	Homo sapiens	High	1	40.7	30.7	22.2	28.5	23.7	29	17.7	18.7	53.3	31	23
H0YBQ2	CCNE2	G1/S-specific cyclin-E2 (Fragment)	Homo sapiens	Medium	1	171.8	138.1	144.3	275.5	140.2	108.1	23.7	17.5	260.8	280.8	113.7
P51946	CCNH	Cyclin-H	Homo sapiens	High	5	258	176.7	208.5	207.6	237.1	168	143.6	138.4	234.5	183.4	179.4
O75909	CCNK	Cyclin-K	Homo sapiens	High	4	546.3	444.6	480.9	525.3	468.7	460.2	419.8	431.5	577.2	526.1	468.4
Q9UK58	CCNL1	Cyclin-L1	Homo sapiens	High	4	221	140.3	133	131.4	137.3	156.5	119.4	134.5	145.6	154.3	160.8
Q96S94	CCNL2	Cyclin-L2	Homo sapiens	High	2	114.6	72.5	83.7	91.8	79.6	67.7	80.3	87.5	116.1	94.6	85.8
O60563	CCNT1	Cyclin-T1	Homo sapiens	High	6	323.1	362.9	403.8	380.3	429.3	457.2	494.3	522	324.4	348.7	456.7
Q8ND76	CCNY	Cyclin-Y	Homo sapiens	High	1	17.7	12.5	18.8	14.9	21.7	12.2	27.8	20.3	12.1	15.5	14.3
O43303	CCP110	Centriolar coiled-coil protein of 110 kDa	Homo sapiens	High	4	24.9	18.7	15.2	15.4	16.1	18.6	19.1	17.3	19.4	26.7	8.8
O14618	CCS	Copper chaperone for superoxide dismutase	Homo sapiens	High	6	249.4	203.6	210.8	263.5	195.7	229.8	150.5	143.4	310.6	333.6	204.4
P78371	CCT2	T-complex protein 1 subunit beta	Homo sapiens	High	40	6052.1	7384.1	6020.2	6134.8	6224.2	6463.6	6201.4	6488.7	5900.4	6513.9	6250.7
P49368	CCT3	T-complex protein 1 subunit gamma	Homo sapiens	High	35	5502.6	6062	5506.4	5675.8	5935.6	5389.9	5314.1	5323.6	5466.3	5419.9	5125.2
P50991	CCT4	T-complex protein 1 subunit delta	Homo sapiens	High	28	5153.3	6162.6	4446.5	5083.3	4586.3	4878.6	4151.7	3938	5099	5079.8	4750.2
P48643	CCT5	T-complex protein 1 subunit epsilon	Homo sapiens	High	38	8400.9	10322.8	8316.1	8078.2	8586.8	8840.4	9174	9040.8	7579.3	7904.5	8962
P40227	CCT6A	T-complex protein 1 subunit zeta	Homo sapiens	High	28	4040.6	4900.9	3860.4	4123.9	3899.4	4504.7	4100.3	4041	4066	4583.2	4590.5
Q99832	CCT7	T-complex protein 1 subunit eta	Homo sapiens	High	37	5230.4	5408.7	5016	4548.4	5412.6	4835.4	5327.9	5559.7	4643.1	5093	4992.6
P50990	CCT8	T-complex protein 1 subunit theta	Homo sapiens	High	42	6488.2	6085.1	6638.6	6454.1	7224.7	5282.4	6920.5	6942.5	6151	6605.1	5605.9
P86790	CCZ1B	Vacuolar fusion protein CCZ1 homolog B	Homo sapiens	High	6	246.2	183.2	160.5	180.9	149.7	184.6	156.9	154.3	186	192	179.6
P48509	CD151	CD151 antigen	Homo sapiens	High	1	79.6	45.2	41.2	46.2	35.6	40.1	33.2	34.5	58.6	52.1	36.2
P20963	CD247	T-cell surface glycoprotein CD3 zeta chain	Homo sapiens	High	2	141.8	209.7	232	152.8	210.4	197.8	197.6	183.3	155.3	138	193.4
Q9Y5K6	CD2AP	CD2-associated protein	Homo sapiens	High	17	673.9	1024.7	926.4	834.3	887.5	1054.3	983.5	954.6	808	744.8	1016.5
O95400	CD2BP2	CD2 antigen cytoplasmic tail-binding protein 2	Homo sapiens	High	6	414.9	349.3	287.6	399.9	300.3	334	266.9	288.2	441.3	476.2	318.2
Q9NPF0	CD320	CD320 antigen	Homo sapiens	High	2	62.9	47.3	52.5	7.5	57	26.4	18.7	32.9	74.5	22.3	23.9
P11049	CD37	Leukocyte antigen CD37	Homo sapiens	High	2	64.5	59.3	52.7	59.6	51.5	47.8	42.6	45.5	58.9	61.8	42.9
P28907	CD38	ADP-ribosyl cyclase/cyclic ADP-ribose hydrolase 1	Homo sapiens	High	4	221	116.4	169.5	174.8	148.2	136.3	128.2	121.5	246	208.7	147.7
P04234	CD3D	T-cell surface glycoprotein CD3 delta chain	Homo sapiens	High	5	139	108.8	148.3	167.8	116.5	137.7	137.8	136.3	154.3	166.2	119.1
P07766	CD3E	T-cell surface glycoprotein CD3 epsilon chain	Homo sapiens	High	6	305.2	397.8	489.6	370.4	409.8	204.6	253.9	249.7	323.3	344.6	190.5
O15446	CD3EAP	DNA-directed RNA polymerase I subunit RPA34	Homo sapiens	High	1	41.8	36.3	27.9	7.7	20.3	17	12	13.7	48.8	47.8	29.4
P09693	CD3G	T-cell surface glycoprotein CD3 gamma chain	Homo sapiens	High	5	291.8	369.9	385.7	346.1	385.3	334	351.6	335.1	312.7	295.2	279.8
P01730	CD4	T-cell surface glycoprotein CD4	Homo sapiens	High	5	566.6	559.8	117.2	97.9	111	141.1	124.9	111.8	114.3	122.2	122.4
P16070	CD44	CD44 antigen	Homo sapiens	High	3	261.8	193.3	207.5	248.2	146.9	164	247.2	239.7	289.1	217.4	151.8
P15529	CD46	Membrane cofactor protein	Homo sapiens	High	2	188	116.7	115.4	126.9	99.9	102.5	77.3	75.4	121.3	87.4	75.7
Q08722	CD47	Leukocyte surface antigen CD47	Homo sapiens	High	5	132.7	183.6	191.1	167.3	160.9	151.7	239.6	214.4	135.2	124.2	212.5
P13987	CD59	CD59 glycoprotein	Homo sapiens	High	2	109.4	78.7	108.2	83.7	108.5	90.8	95.7	87.8	108.4	107.7	67.5
P08962	CD63	CD63 antigen	Homo sapiens	High	1	448.8	269.8	273.1	394.1	245.7	304.9	228.7	212.3	455.5	324.7	254.8
P09564	CD7	T-cell antigen CD7	Homo sapiens	High	2	47.2	29.2	26.9	42.8	22.6	28.8	17	12.8	52.9	55.8	21.9
P60033	CD81	CD81 antigen	Homo sapiens	High	2	196.5	177	84	83.9	101.1	87.8	80.5	76.9	76.7	87.6	80
P27701	CD82	CD82 antigen	Homo sapiens	High	2	326.5	328.3	226.4	247.3	136.4	269.7	175.1	180.8	372.1	286.6	228.3
Q9UIB8	CD84	SLAM family member 5	Homo sapiens	High	2	104.7	55.1	75.5	50	69.4	51	44.7	46.9	96	93	66.9
Q8IWY9	CDAN1	Codanin-1	Homo sapiens	High	2	99.2	80.5	82.7	118.3	76.5	79.5	49	45.7	111.6	113.1	76.3
O75794	CDC123	Cell division cycle protein 123 homolog	Homo sapiens	High	8	397.1	429.3	224.8	310.4	235.4	362.2	195	180.3	311.9	341.4	322.5
Q13042	CDC16	Cell division cycle protein 16 homolog	Homo sapiens	High	8	334.8	308.4	283.8	286.2	269.4	322.1	256	249.7	282	269.7	288.1
Q12834	CDC20	Cell division cycle protein 20 homolog	Homo sapiens	High	7	277.8	475.7	386.1	347.6	326.4	382.9	393.9	374.7	300.8	304.1	415.1
Q9UJX2	CDC23	Cell division cycle protein 23 homolog	Homo sapiens	High	11	478.5	426.2	394.2	480.1	398.6	383.8	330.7	324.4	418.9	445.9	414.6
P30307	CDC25C	M-phase inducer phosphatase 3	Homo sapiens	High	1	67.4	66.6	76.2	78.5	88.8	80.3	57.9	71.2	72.2	73.3	77.8
Q8NHZ8	CDC26	Anaphase-promoting complex subunit CDC26	Homo sapiens	High	1	22.6	70	43.4	29.5	36.6	78.7	49.4	54.4	22.9	19.2	56.1
P30260	CDC27	Cell division cycle protein 27 homolog	Homo sapiens	High	7	464.7	331.4	331.3	401.4	298.1	357.2	262.7	263.2	389.6	383.6	373.6
P49427	CDC34	Ubiquitin-conjugating enzyme E2 R1	Homo sapiens	High	4	281.5	289	288.7	322.9	278.7	296.8	276.7	271.8	270.7	247.3	240
Q16543	CDC37	Hsp90 co-chaperone Cdc37	Homo sapiens	High	14	1007.3	1748	1186.9	1137.7	1283.8	1559.9	1420.1	1432.5	1007.5	1208.6	1616.1
O60508	CDC40	Pre-mRNA-processing factor 17	Homo sapiens	High	17	949.2	946.1	887.4	983.9	874.6	971	743	737.8	990.4	1077.7	908.4
P60953	CDC42	Cell division control protein 42 homolog	Homo sapiens	High	7	733.3	1151.4	736.1	777.3	825.9	1077.7	997.6	1035.9	706.9	827.5	1053.4
O75419	CDC45	Cell division control protein 45 homolog	Homo sapiens	High	5	595.4	412.7	502.3	586	503.7	382.5	356.1	321.1	636.2	596.4	351.4
Q99459	CDC5L	Cell division cycle 5-like protein	Homo sapiens	High	36	1951.6	1943.7	2083.3	2023.2	2096.8	1967.5	1965.2	1965.8	1894	1924.7	1893
Q99741	CDC6	Cell division control protein 6 homolog	Homo sapiens	High	1	24.3	23.2	17.5	19.2	13.3	32.3	19.3	17.1	25.2	21.6	31
Q6P1J9	CDC73	Parafibromin	Homo sapiens	High	22	1494.8	1583.1	1554.4	1490.1	1606.4	1715.7	1801.1	1890.6	1356.4	1481.3	1741.8
Q69YH5	CDCA2	Cell division cycle-associated protein 2	Homo sapiens	High	5	97.8	105.3	123.3	131.3	92.4	103.5	101.5	81.9	129	104.9	96.6
Q99618	CDCA3	Cell division cycle-associated protein 3	Homo sapiens	High	1	20.4	17.7	15.4	23.1	12.9	16.3	14.6	12	15	15.8	16.6
Q96FF9	CDCA5	Sororin	Homo sapiens	High	4	195.9	204.6	345.2	242.2	296.1	258.2	461.8	474.2	164.7	184.4	290.4
Q96GN5	CDCA7L	Cell division cycle-associated 7-like protein	Homo sapiens	High	3	188.5	122.9	92.1	124.4	96.2	80.8	70.7	72.6	130.6	128.5	83.6
Q53HL2	CDCA8	Borealin	Homo sapiens	High	7	383.8	328.6	502.2	524.4	386.6	368.4	310.3	310.8	359	357.2	379.4
P06493	CDK1	Cyclin-dependent kinase 1	Homo sapiens	High	13	2114.3	1915.1	1686.7	1997.1	1812.4	1621.3	1637.8	1642.5	1876.5	1816.9	1538.3
Q9UQ88	CDK11A	Cyclin-dependent kinase 11A	Homo sapiens	High	15	754.7	657	667.3	777.1	638.8	776	581.7	551.2	792.8	734.3	728.1
Q9NYV4	CDK12	Cyclin-dependent kinase 12	Homo sapiens	High	3	125.8	103.6	120.9	145.2	98.1	105.2	84.3	97.2	171	145	101.6
Q14004	CDK13	Cyclin-dependent kinase 13	Homo sapiens	High	4	428.5	464.6	356.9	371.7	325.2	431.3	302	353.1	399.5	376.3	412.3
Q00537	CDK17	Cyclin-dependent kinase 17	Homo sapiens	High	2	32.6	32.4	41.9	43.1	35.8	36.4	32.9	35.8	37	30	43.8
P24941	CDK2	Cyclin-dependent kinase 2	Homo sapiens	High	10	647.8	592.8	724.6	662.1	782.7	603.2	912.8	878.1	681.4	706.1	689.3
O75956	CDK2AP2	Cyclin-dependent kinase 2-associated protein 2	Homo sapiens	High	1	40.1	32.1	64.5	49.7	65.1	37.9	64.8	65.8	52.1	41.1	25.7
P11802	CDK4	Cyclin-dependent kinase 4	Homo sapiens	High	2	269.1	145	114.2	224.4	139.9	159.7	127.1	158.9	222.1	179.5	186.7
Q00535	CDK5	Cyclin-dependent-like kinase 5	Homo sapiens	High	5	172.8	216.1	213.5	187.8	195.5	286.5	294.5	312.3	185.4	182.7	303.8
Q96SZ6	CDK5RAP1	CDK5 regulatory subunit-associated protein 1	Homo sapiens	High	8	316.1	248.1	250.4	284.1	214.4	270.4	230	221.6	323.7	279.7	273.6
Q96SN8	CDK5RAP2	CDK5 regulatory subunit-associated protein 2	Homo sapiens	High	6	335.2	376.6	315.7	333.5	313.8	706	469.3	459.2	348.6	305.7	711.9
Q96JB5	CDK5RAP3	CDK5 regulatory subunit-associated protein 3	Homo sapiens	High	12	884.8	917.3	927.6	1009.2	865	980.2	665.5	699.8	1024.9	1075.3	901.6
Q00534	CDK6	Cyclin-dependent kinase 6	Homo sapiens	High	13	1383.2	1322	1091.2	1279.6	1245.8	1098.4	1006	1022.1	1251.9	1210.2	1050.2
P50613	CDK7	Cyclin-dependent kinase 7	Homo sapiens	High	6	370	455.7	448	411.3	464.5	557.1	508.3	519.8	342.4	347.4	508.2
P49336	CDK8	Cyclin-dependent kinase 8	Homo sapiens	High	5	238	229.7	297.2	258.1	270.7	255.6	288.9	289.8	242.7	235.5	268.6
P50750	CDK9	Cyclin-dependent kinase 9	Homo sapiens	High	8	260.3	245.2	249	254.6	225.8	259.8	211.8	245.6	243.8	297.9	227.6
Q5VV42	CDKAL1	Threonylcarbamoyladenosine tRNA methylthiotransferase	Homo sapiens	High	7	396.8	323.4	407.9	489.9	353.6	315	316.8	314.3	513.5	536.7	333.4
Q9NXV6	CDKN2AIP	CDKN2A-interacting protein	Homo sapiens	High	4	173	149	142	175.5	172	180.5	179.8	168.1	154.7	155.2	193.9
Q96HQ2	CDKN2AIPNL	CDKN2AIP N-terminal-like protein	Homo sapiens	High	2	34.7	52.3	56.9	71.7	57.5	66.9	50.4	43	82.3	102.5	69.6
P42773	CDKN2C	Cyclin-dependent kinase 4 inhibitor C	Homo sapiens	High	1	29.6	32.4	29.7	38.3	28.3	28.7	23.5	20.5	46.2	41.2	21.7
O95674	CDS2	Phosphatidate cytidylyltransferase 2	Homo sapiens	High	2	7.4	10.2	20.3		15.4	29.1	39	42.7	9.9	14.8	30.7
Q15517	CDSN	Corneodesmosin	Homo sapiens	High	1	30.9	69	79	157.6	103.1	54.4	63.5	55.3	45	44.6	44.8
Q9H211	CDT1	DNA replication factor Cdt1	Homo sapiens	Medium	1	27.9	16.7	13.6	11.8	16.9	31.6	18.1	25.2	13.6	14.7	33.4
Q9UKY7	CDV3	Protein CDV3 homolog	Homo sapiens	High	8	274.8	671.5	420.1	342.3	453.5	561.3	533.6	625.3	313.9	273.9	460.6
Q9Y232	CDYL	Chromodomain Y-like protein	Homo sapiens	High	2	56.2	35.6	43.3	55	45.8	39.9	34.6	38.9	49.1	55.8	40.4
P17676	CEBPB	CCAAT/enhancer-binding protein beta	Homo sapiens	High	1	32.7	19.5	26.7	25.5	19.5	16.6	13.1	9.6	30.6	35.4	20
P53567	CEBPG	CCAAT/enhancer-binding protein gamma	Homo sapiens	High	2	30	43.1	55.1	45.8	60.8	37.1	48.4	49.1	38.7	35.3	43.1
Q03701	CEBPZ	CCAAT/enhancer-binding protein zeta	Homo sapiens	High	22	2221.6	1645.5	2258.8	2022.4	1906	1704.1	1937.5	1949.6	2214.8	1946.4	1656
Q9BXW7	CECR5	Cat eye syndrome critical region protein 5	Homo sapiens	High	11	888	701	862.9	1006.2	798.5	806.9	923.1	835	1064.8	1027.6	976.1
Q92879	CELF1	CUGBP Elav-like family member 1	Homo sapiens	High	9	1697.7	1482.3	1521.3	1635.3	1512.5	1544.7	1414.5	1502.2	1725.4	1652.5	1462.2
O95319	CELF2	CUGBP Elav-like family member 2	Homo sapiens	High	7	978.6	836.6	996.5	1081.9	941.7	971.9	916.6	959.9	989.1	994.3	890.3
A0A0J9YXJ0	CELF2	CUGBP Elav-like family member 2	Homo sapiens	Medium	1	85.7	61.8	58.2	77.9	61.5	79.8	44.6	42.6	77.1	71.9	68.4
P07199	CENPB	Major centromere autoantigen B	Homo sapiens	High	1	19.1	21	16.2	16.8	13.2	22.5	16.6	19.4	14.7	20.7	27.9
Q03188	CENPC	Centromere protein C	Homo sapiens	High	7	306.6	249.2	366.7	295.5	280.6	289.1	225.6	248.5	305.2	288	268.4
Q02224	CENPE	Centromere-associated protein E	Homo sapiens	High	3	151.4	140.4	122	148.1	115.2	164.4	139.9	126.4	128.2	118.6	161.3
P49454	CENPF	Centromere protein F	Homo sapiens	High	30	1499.1	1435.9	1317.7	1534.7	1250	1337.9	1151.1	1064.1	1610.2	1513	1411.8
Q9H3R5	CENPH	Centromere protein H	Homo sapiens	High	3	91.7	142	126.3	107.4	109.8	153.8	153.2	134.8	92.1	92.4	158.3
Q92674	CENPI	Centromere protein I	Homo sapiens	High	3	137.6	116.6	108.6	130.5	99.8	96.6	64.2	60.2	159.9	139	101.4
Q9BS16	CENPK	Centromere protein K	Homo sapiens	High	2	126.3	118.2	213.1	158.9	187.3	213.8	228.4	279	146.7	134.4	194.2
Q9NSP4	CENPM	Centromere protein M	Homo sapiens	High	1	25.2	18.3	19.3	23.1	13.7	13.7	13.2	13.3	26.2	32.8	17.8
Q96H22	CENPN	Centromere protein N	Homo sapiens	High	3	20.2	22.9	21.6	16.5	21.6	35.7	39	39.7	20.6	17.1	59.9
Q9BU64	CENPO	Centromere protein O	Homo sapiens	High	2	300.2	95	143.2	88.2	138.5	65.4	72.2	74.6	251.3	274	78.4
Q6IPU0	CENPP	Centromere protein P	Homo sapiens	High	3	126.7	118.4	135.2	112.1	122.9	138.3	133.7	124.5	136.1	123.5	146.6
Q96BT3	CENPT	Centromere protein T	Homo sapiens	High	4	145.3	118.8	142	148.1	126.6	127.1	128.3	132.1	135.8	126.6	128.7
Q71F23	CENPU	Centromere protein U	Homo sapiens	High	1	183.7	99.5	136.7	158.7	100.7	85.9	71.7	73.5	207.4	170.1	90.6
Q7Z7K6	CENPV	Centromere protein V	Homo sapiens	High	6	413.3	289.6	461.1	347.6	416.7	265.2	228.2	227.7	353.8	391	245.4
Q8N960	CEP120	Centrosomal protein of 120 kDa	Homo sapiens	High	2	51.1	56.7	36.2	51.7	36.7	50.2	50.1	47	62.8	61.3	48.8
Q6ZU80	CEP128	Centrosomal protein of 128 kDa	Homo sapiens	High	1	27.7	26	29	26.3	25.2	32.8	32.9	36.6	27.3	20	36
Q9UPN4	CEP131	Centrosomal protein of 131 kDa	Homo sapiens	High	16	487.3	443.1	428.9	450.1	437.5	488.4	474.1	437.5	592.9	551.5	504.9
Q66GS9	CEP135	Centrosomal protein of 135 kDa	Homo sapiens	High	6	244.7	162.9	174.5	187.4	157.2	147.5	119.4	116	229.2	212	127.6
Q5SW79	CEP170	Centrosomal protein of 170 kDa	Homo sapiens	High	12	508.7	469	430.4	517.1	405.5	480	392.7	395.9	557.9	547.8	473.3
Q8TEP8	CEP192	Centrosomal protein of 192 kDa	Homo sapiens	High	1	23.5	19.3	22.9	28.5	20.6	31.6	14.2	16.5	29.7	19.2	21.1
Q9BV73	CEP250	Centrosome-associated protein CEP250	Homo sapiens	High	11	182.5	225.4	180.7	182.7	149.4	257.5	175.7	180.8	247	447	291.2
O15078	CEP290	Centrosomal protein of 290 kDa	Homo sapiens	High	2	100.1	92	86.9	111	82.5	77.3	75.6	67.6	123.6	133.6	82.7
Q5VT06	CEP350	Centrosome-associated protein 350	Homo sapiens	High	2	55.5	48.6	60.9	56.3	71.1	45.2	87.5	78.1	56.5	71.4	51.6
Q9BYV8	CEP41	Centrosomal protein of 41 kDa	Homo sapiens	High	3	126.7	97.8	95.8	123.7	90.5	63.2	37.3	42.9	166.7	147.3	66.5
Q9C0F1	CEP44	Centrosomal protein of 44 kDa	Homo sapiens	High	8	257.7	280.6	229.3	255.3	232.3	296	260	261.7	290.8	289.3	330.6
Q53EZ4	CEP55	Centrosomal protein of 55 kDa	Homo sapiens	High	7	205.5	305.3	217.4	202.8	202.2	267.5	328	321.1	181.8	240.3	287.5
Q9P209	CEP72	Centrosomal protein of 72 kDa	Homo sapiens	High	1	20.9	24.2	13.3	8.6	16.2	17.1	20.3	21.6	17.2	23.1	26.2
Q8TAP6	CEP76	Centrosomal protein of 76 kDa	Homo sapiens	High	4	143.6	110.8	108.2	122.9	112	116.9	85.7	81.7	125.5	107.2	99.5
Q5JTW2	CEP78	Centrosomal protein of 78 kDa	Homo sapiens	High	2	79.5	61.4	44	57.5	42.7	63.2	32.6	30.7	52.7	70.8	67.8
Q6P2H3	CEP85	Centrosomal protein of 85 kDa	Homo sapiens	High	9	390.3	466	320.6	362.7	337.2	456.1	332.2	329.1	374.1	384.3	445.1
Q8IW35	CEP97	Centrosomal protein of 97 kDa	Homo sapiens	High	5	155.4	139.1	113.9	149.1	120.7	136.8	89.5	86.2	197	180.8	129.6
Q9Y6K0	CEPT1	Choline/ethanolaminephosphotransferase 1	Homo sapiens	High	2	105.6	103.2	122.5	122	108.9	108.3	146.9	132.5	115.5	96.9	144.5
Q96G23	CERS2	Ceramide synthase 2	Homo sapiens	High	5	371.3	328.5	453.1	408.7	358.7	308.7	377.3	369.5	426.7	458	342.5
Q9HA82	CERS4	Ceramide synthase 4	Homo sapiens	Medium	1	23.9	22.5	15.1	21.9	18.2	23.1	9.3	14.6	33.4	27.5	17.8
Q8N5B7	CERS5	Ceramide synthase 5	Homo sapiens	High	2	179.9	123.6	204.4	201.3	200.3	172.7	204.8	212.3	160.4	170.1	177.2
Q6ZMG9	CERS6	Ceramide synthase 6	Homo sapiens	High	2	148.7	139.7	165.6	187.6	141.7	144.3	159.2	135.9	184.5	212.8	144.9
Q6UWW8	CES3	Carboxylesterase 3	Homo sapiens	High	3	57.3	41.5	59.6	60.1	52	93.3	103.9	106.5	67.2	40.9	96.8
P41208	CETN2	Centrin-2	Homo sapiens	High	4	106	241.7	200.3	157.3	199.2	221	274.3	240.2	110.9	135.9	277.8
O15182	CETN3	Centrin-3	Homo sapiens	High	4	191.3	313	294.4	266.6	273.5	362	492.5	499.8	225.8	216.3	396.4
Q9Y6A4	CFAP20	Cilia- and flagella-associated protein 20	Homo sapiens	High	5	210.4	285.6	231.5	232.1	241.7	254.1	209.7	199.9	193	209.8	249.5
Q96G28	CFAP36	Cilia- and flagella-associated protein 36	Homo sapiens	High	2	20.2	41.9	38.6	30	35.9	45.2	46.9	49.8	22.8	24.5	52.2
Q9P2B7	CFAP97	Cilia- and flagella-associated protein 97	Homo sapiens	Medium	1	32.2	42.3	29.6	24.1	34.2	36.1	40	44.2	23.6	28.7	41.4
Q9UEE9	CFDP1	Craniofacial development protein 1	Homo sapiens	High	3	184.7	228.9	143.7	160.4	160.4	205.8	175.7	197.4	178.9	167.5	180.8
P23528	CFL1	Cofilin-1	Homo sapiens	High	19	3028	4879.8	4171.7	3515.6	4604.3	5312.2	5565.4	5699.1	3084.3	3447.8	5269.3
Q9UFW8	CGGBP1	CGG triplet repeat-binding protein 1	Homo sapiens	High	8	430.7	542.5	526.8	449.5	523.6	611.5	623.8	657.9	438.7	456	627.7
Q8WUX2	CHAC2	Putative glutathione-specific gamma-glutamylcyclotransferase 2	Homo sapiens	High	5	314.9	339	230	269.6	278.3	319.4	240.9	258.5	280.6	302.5	319.9
Q13111	CHAF1A	Chromatin assembly factor 1 subunit A	Homo sapiens	High	15	925.8	883.3	1111.5	905.8	1081.5	914.7	1234.5	1261.7	925.4	781.1	926.7
Q13112	CHAF1B	Chromatin assembly factor 1 subunit B	Homo sapiens	High	12	606.7	507.3	646.9	620.2	609.6	549.3	548.9	538.3	623.4	608.7	612.8
Q96JM3	CHAMP1	Chromosome alignment-maintaining phosphoprotein 1	Homo sapiens	High	13	532.9	588.9	806.2	605.1	835.5	645.9	909.7	933	495.7	480.2	658.9
Q5T1J5	CHCHD2P9	Putative coiled-coil-helix-coiled-coil-helix domain-containing protein CHCHD2P9, mitochondrial	Homo sapiens	High	1	74.7	39.4	20.5	38.5	20.4	36.5	22.1	19.8	37	34.5	28.7
Q9NX63	CHCHD3	MICOS complex subunit MIC19	Homo sapiens	High	13	874.3	1108.9	1094.7	976	1133.4	999	1307.7	1235.8	815.8	911.4	1258.6
Q9BRQ6	CHCHD6	MICOS complex subunit MIC25	Homo sapiens	High	3	234.7	181.9	186.8	216.9	194.9	196.6	221.4	226.5	223.2	223.3	237.4
Q9BUK0	CHCHD7	Coiled-coil-helix-coiled-coil-helix domain-containing protein 7	Homo sapiens	High	1	18.9	23.9	20.4	22.2	17.2	25.5	21.2	16.6	23.2	21.7	22.3
O14646	CHD1	Chromodomain-helicase-DNA-binding protein 1	Homo sapiens	High	10	1037.1	1057.6	882	929.8	844.1	1098.1	954.4	991.5	1053.3	1021	1150.2
Q86WJ1	CHD1L	Chromodomain-helicase-DNA-binding protein 1-like	Homo sapiens	High	20	1472.1	1091.1	1215.7	1470.2	1125.7	1147.6	877.7	880	1598.9	1544.9	1107.2
O14647	CHD2	Chromodomain-helicase-DNA-binding protein 2	Homo sapiens	High	5	117.8	103	109.9	116.5	111.3	101	75.4	65.8	122.1	129.3	100.4
Q12873	CHD3	Chromodomain-helicase-DNA-binding protein 3	Homo sapiens	High	24	1567.6	1527.6	1467.5	1529.3	1334.1	1636.8	1325.3	1363.4	1560.1	1486	1663.1
Q14839	CHD4	Chromodomain-helicase-DNA-binding protein 4	Homo sapiens	High	51	7331.2	6973.6	7339.4	7248.4	6685.1	7343	6951.4	7111.6	7289.6	6880.8	6860.8
Q8TD26	CHD6	Chromodomain-helicase-DNA-binding protein 6	Homo sapiens	High	1	46.9	70.2	66.9	57.7	56.6	76.6	70.5	77.7	44.5	45.1	95.3
Q9P2D1	CHD7	Chromodomain-helicase-DNA-binding protein 7	Homo sapiens	High	10	1738.4	1188.5	1154.5	1285.6	1056.2	1343.6	1020.6	1059.8	1418.2	1385.6	1262
Q9HCK8	CHD8	Chromodomain-helicase-DNA-binding protein 8	Homo sapiens	High	3	217.5	243.7	239.8	215.7	224.5	274.9	298.1	311.8	204.9	194.4	283.7
Q3L8U1	CHD9	Chromodomain-helicase-DNA-binding protein 9	Homo sapiens	High	3	167.1	121.3	123.1	147.6	115.4	117	65	63.6	148.7	141.5	104
O14757	CHEK1	Serine/threonine-protein kinase Chk1	Homo sapiens	High	8	374.8	465.9	407.8	353.3	418	569.9	686.7	695.3	376.5	348.8	576.7
O96017	CHEK2	Serine/threonine-protein kinase Chk2	Homo sapiens	High	9	531.7	640.6	507	564.2	516.4	678.3	549.9	559.5	592.7	624.4	739.2
Q8IWX8	CHERP	Calcium homeostasis endoplasmic reticulum protein	Homo sapiens	High	19	1614.3	1701.8	1580.3	1711.6	1596.8	1627	1797.8	1996.9	1737.4	1613.2	1661.1
Q15782	CHI3L2	Chitinase-3-like protein 2	Homo sapiens	High	1	53.7	31.8	27.5	36.6	27.5	32.4	23.9	25	45.5	42.2	37.8
Q9BWS9	CHID1	Chitinase domain-containing protein 1	Homo sapiens	High	9	602.3	574.4	710.3	712.3	674.8	572.4	665.1	654.4	697.6	663	675.5
P35790	CHKA	Choline kinase alpha	Homo sapiens	High	3	161	80.6	58.3	81.8	56.1	46	27.8	28.7	105.6	99.8	47.7
P24386	CHM	Rab proteins geranylgeranyltransferase component A 1	Homo sapiens	High	6	374.2	309.1	326.9	348.9	312.1	329.8	247.1	284.2	328.2	317.5	314.6
P26374	CHML	Rab proteins geranylgeranyltransferase component A 2	Homo sapiens	High	2	17.2	28.4	23	22.6	21.1	30.4	35.5	24.2	22.3	17.3	22.8
Q9HD42	CHMP1A	Charged multivesicular body protein 1a	Homo sapiens	High	2	129.1	108	113.5	123.9	135.9	107.7	104.3	105	140.1	130	103.1
Q7LBR1	CHMP1B	Charged multivesicular body protein 1b	Homo sapiens	High	3	390.7	208.6	455.5	352.8	466.2	402.4	267	329	348	286.6	365.4
O43633	CHMP2A	Charged multivesicular body protein 2a	Homo sapiens	High	8	343	544.6	494.2	428.8	642.1	642.1	944.9	938	365.7	388.6	742.8
Q9Y3E7	CHMP3	Charged multivesicular body protein 3	Homo sapiens	High	3	172.3	230.3	193.4	194	140.4	233	192.2	203.7	202.9	155	203
Q9BY43	CHMP4A	Charged multivesicular body protein 4a	Homo sapiens	High	5	236.1	280.7	226.4	254.5	220.8	258.5	244.4	236.4	250	273.2	268.3
Q9H444	CHMP4B	Charged multivesicular body protein 4b	Homo sapiens	High	9	766.3	958.2	950	890.7	1128.1	1333.3	1295	1427.4	782.7	846.3	1302.1
Q9NZZ3	CHMP5	Charged multivesicular body protein 5	Homo sapiens	High	7	224.2	528.6	431	263.7	531.6	571.7	929.6	983.5	251.6	269	662.8
Q96FZ7	CHMP6	Charged multivesicular body protein 6	Homo sapiens	High	2	15.4	24.5	22	16.8	23.4	22.9	24.7	19.8	29.6	32.4	36
Q8WUX9	CHMP7	Charged multivesicular body protein 7	Homo sapiens	High	11	487.2	478.4	492.1	504.8	444.6	556.4	419.2	473.9	503.4	461.5	515.7
Q9UHD1	CHORDC1	Cysteine and histidine-rich domain-containing protein 1	Homo sapiens	High	17	1192.1	2213.9	1459	1332.5	1618.8	2078.1	2462.1	2583.1	1209.3	1365.2	2214.2
Q99653	CHP1	Calcineurin B homologous protein 1	Homo sapiens	High	7	301.2	337.6	243.5	317.4	230.2	352.4	301.8	311.4	274.3	285.1	321.8
Q9P2E5	CHPF2	Chondroitin sulfate glucuronyltransferase	Homo sapiens	High	4	118.7	121.5	100	107.5	101.3	116.1	96.3	82.5	148.5	148.5	125.2
Q9NRG0	CHRAC1	Chromatin accessibility complex protein 1	Homo sapiens	High	3	345.1	266.7	208.5	273.9	166.5	228.8	151.7	140.9	323.9	350.7	201.1
Q9NPF2	CHST11	Carbohydrate sulfotransferase 11	Homo sapiens	High	5	153.6	116.1	128	123.4	125	67	52.7	53.8	128.7	135	50.3
Q8NCH0	CHST14	Carbohydrate sulfotransferase 14	Homo sapiens	High	3	140.5	82.9	83.7	111.1	79	89.9	58.6	65.7	119.9	114.8	93.7
Q9Y4C5	CHST2	Carbohydrate sulfotransferase 2	Homo sapiens	High	1	25.5	22.9	16.5	22.5	14.8	15.9	16.7	14.4	19.1	18.4	21.3
Q8WVB6	CHTF18	Chromosome transmission fidelity protein 18 homolog	Homo sapiens	High	14	714.4	465.7	512.3	653.7	475.4	448.4	282.9	294.6	721.8	673.4	451.3
P0CG13	CHTF8	Chromosome transmission fidelity protein 8 homolog	Homo sapiens	High	1	81.8	72.7	88	78	84	78.5	73.6	75.2	73.5	61.1	72
Q9Y3Y2	CHTOP	Chromatin target of PRMT1 protein	Homo sapiens	High	4	674.9	480.7	654.9	547.2	596	509.3	529.8	506	561.2	555.6	490.2
O15111	CHUK	Inhibitor of nuclear factor kappa-B kinase subunit alpha	Homo sapiens	High	13	771	840.6	789.2	805.5	764	780.8	874.7	861.2	792.7	793.9	827.6
Q8WUH1	CHURC1	Protein Churchill	Homo sapiens	High	3	111.2	147.1	121.5	109.9	144.7	147.6	207.2	253.5	118.2	118.2	152.6
O76071	CIAO1	Probable cytosolic iron-sulfur protein assembly protein CIAO1	Homo sapiens	High	6	206.9	189.5	153.2	188.5	158.1	170	119.2	114.1	191.2	214.8	158.7
Q6FI81	CIAPIN1	Anamorsin	Homo sapiens	High	13	965.4	1286.4	926.5	919	922.9	709.5	630.1	591.4	1026.6	1113.3	731.5
Q99828	CIB1	Calcium and integrin-binding protein 1	Homo sapiens	High	3	64.6	45.4	38.7	52.5	33.3	40.6	23.9	27.2	60.6	56.2	38.4
Q9BW66	CINP	Cyclin-dependent kinase 2-interacting protein	Homo sapiens	High	1	15.7	18.1	13.1	11.7	22.3	19	15.8	15	13.3	19.7	23
Q14011	CIRBP	Cold-inducible RNA-binding protein	Homo sapiens	High	6	973.9	921.1	749.1	743.8	868	871.5	828.1	836.2	588.6	833	797.8
Q9NZ45	CISD1	CDGSH iron-sulfur domain-containing protein 1	Homo sapiens	High	4	350.2	464.4	863	605.5	857.4	617.8	1500.1	1514.3	523.1	505.6	653.2
Q8N5K1	CISD2	CDGSH iron-sulfur domain-containing protein 2	Homo sapiens	High	7	497.2	446.9	726.8	603.9	628	484.8	609.6	541.1	657.4	568.6	507.8
O14578	CIT	Citron Rho-interacting kinase	Homo sapiens	High	7	248.5	197.5	199	254.3	168.9	215.4	157.1	157.7	293.6	256.8	206.5
Q9ULV3	CIZ1	Cip1-interacting zinc finger protein	Homo sapiens	High	3	83.7	57.9	108.3	85.5	96.6	80.3	162.4	170.6	72.8	64.8	90.5
Q8WWK9	CKAP2	Cytoskeleton-associated protein 2	Homo sapiens	High	4	138.6	171.4	185.6	224.1	179.3	182.9	158.6	173	117	111.4	195.8
Q8IYA6	CKAP2L	Cytoskeleton-associated protein 2-like	Homo sapiens	High	4	168.1	178.6	245.5	221.4	244.7	159	221.6	223.8	150.4	183.3	171.3
Q07065	CKAP4	Cytoskeleton-associated protein 4	Homo sapiens	High	2	63.4	45.9	54.1	55.6	52	48.2	42.7	37.2	73	62.8	46.5
Q14008	CKAP5	Cytoskeleton-associated protein 5	Homo sapiens	High	64	3650.9	4635.5	4470.7	4082.6	4490.1	4505.8	4957.6	5059.1	3664	3638	4721.8
P61024	CKS1B	Cyclin-dependent kinases regulatory subunit 1	Homo sapiens	High	3	238.3	426.8	240.6	219.9	215	307.9	238.9	209.3	250.2	256.8	174
P33552	CKS2	Cyclin-dependent kinases regulatory subunit 2	Homo sapiens	High	1	822.1	561.4	399.9	653.5	308.2	185.7	125.2	108.8	599.8	550.9	101.2
Q7Z460	CLASP1	CLIP-associating protein 1	Homo sapiens	High	21	1114.7	1104.4	976.9	1121	967.3	1005.3	986.2	990.7	1091.8	1090	1062.9
Q7Z460-3	CLASP1	Isoform 3 of CLIP-associating protein 1	Homo sapiens	High	2	107.6	76.8	53.8	79.5	56.9	62.4	34.7	50.5	75.3	74.6	53
O75122	CLASP2	CLIP-associating protein 2	Homo sapiens	High	12	524.7	622.9	524.4	521.2	544.6	702.1	601.1	607.3	546.2	564.4	730
O75122-3	CLASP2	Isoform 3 of CLIP-associating protein 2	Homo sapiens	High	4	149.6	158.3	118.4	147.3	134.9	152.3	173.7	151.2	122.1	142.5	180.4
Q8N2M8	CLASRP	CLK4-associating serine/arginine rich protein	Homo sapiens	High	1	31.4	22.7	33.2	27.4	30.1	29.2	33.1	31.3	29.5	26	28
P51790	CLCN3	H(+)/Cl(-) exchange transporter 3	Homo sapiens	High	7	411.3	313.8	428.1	423.5	375.1	387.6	458.1	491.2	425.1	378.2	382.9
P51798	CLCN7	H(+)/Cl(-) exchange transporter 7	Homo sapiens	High	6	367	216.3	219.2	325	210.7	192.2	162	141.2	355.9	324.3	199
Q9NY35	CLDND1	Claudin domain-containing protein 1	Homo sapiens	High	3	263.4	220	149.5	193.1	115.8	145.3	114.5	118.8	246.8	211.5	152.8
Q2KHT3	CLEC16A	Protein CLEC16A	Homo sapiens	High	3	46.9	31.2	27.9	37.5	18.1	30.6	18.9	20.1	32.9	60.6	30.5
O00299	CLIC1	Chloride intracellular channel protein 1	Homo sapiens	High	18	1096.7	1541.1	1054.5	1193.3	1131	1371.7	894.7	891.1	1170	1228.7	1304.2
Q14677	CLINT1	Clathrin interactor 1	Homo sapiens	High	16	822.1	858.3	925	942.7	898	959.3	941.3	1023.2	895	839.4	913
P30622	CLIP1	CAP-Gly domain-containing linker protein 1	Homo sapiens	High	9	247.6	243.9	256.7	263.3	235	287.6	246.2	262.8	278.8	246.6	272.8
P49760	CLK2	Dual specificity protein kinase CLK2	Homo sapiens	High	3	195.5	100.9	111.4	127.1	98.8	129.6	90.4	91.9	138.3	137.5	108.5
P49761	CLK3	Dual specificity protein kinase CLK3	Homo sapiens	High	9	366.9	275.8	299.1	371.5	255.8	379.9	290.1	193.1	395.2	429.9	345.8
O75503	CLN5	Ceroid-lipofuscinosis neuronal protein 5	Homo sapiens	High	2	80.3	40.6	91.5	86.8	92	54.8	124.8	134.2	78.1	62.4	61
Q9NWW5	CLN6	Ceroid-lipofuscinosis neuronal protein 6	Homo sapiens	High	1	52.6	20	29.3	33.1	20.9	19.6	27.2	28.5	53.1	42.7	26.3
P54105	CLNS1A	Methylosome subunit pICln	Homo sapiens	High	5	173.8	140.2	117.7	151.5	133.8	124.2	78.5	87.2	160.4	182.5	127.4
Q92989	CLP1	Polyribonucleotide 5'-hydroxyl-kinase Clp1	Homo sapiens	High	3	189.2	138.9	139.7	171.8	130.5	164.1	137.3	126.9	161.3	139.1	227
Q9H078	CLPB	Caseinolytic peptidase B protein homolog	Homo sapiens	High	16	1130.6	861.8	976	1157.6	925.2	853.6	851.7	878.1	1120.3	1215.4	898.8
Q9H078-2	CLPB	Isoform 2 of Caseinolytic peptidase B protein homolog	Homo sapiens	High	3	72.1	39.5	46.1	62.3	40.6	28.2	40.5	35.8	65.2	70.4	30.6
Q16740	CLPP	ATP-dependent Clp protease proteolytic subunit, mitochondrial	Homo sapiens	High	8	1107.1	824.8	918.1	1217.7	911.3	733.8	644	591.2	1327.5	1309.3	682.5
O96005	CLPTM1	Cleft lip and palate transmembrane protein 1	Homo sapiens	High	5	303.1	295.7	275.5	333.3	244.4	315.9	269.1	263.6	358.1	317.9	323.6
Q96KA5	CLPTM1L	Cleft lip and palate transmembrane protein 1-like protein	Homo sapiens	High	6	216	166.9	182.4	176.8	179.1	186.2	147.4	152.4	205.9	173.8	140.4
O76031	CLPX	ATP-dependent Clp protease ATP-binding subunit clpX-like, mitochondrial	Homo sapiens	High	20	1306.8	1270.3	1168.7	1396.3	1124.3	980.5	1260.9	1169.2	1361.7	1260.1	1068
Q9HAW4	CLSPN	Claspin	Homo sapiens	High	3	72.2	61.9	52.4	65.9	45.4	54	37.1	41.3	81.7	92.2	47.6
P09496	CLTA	Clathrin light chain A	Homo sapiens	High	13	396.4	684.7	699.5	549.4	721	773	931.4	984.8	485.8	486.2	792.5
P09496-2	CLTA	Isoform Non-brain of Clathrin light chain A	Homo sapiens	High	3	182.3	311.6	265.2	285.1	280.2	349.3	311.5	294.7	257.3	256.7	288
P09497	CLTB	Clathrin light chain B	Homo sapiens	High	4	212.1	344.9	322.4	266.3	288.4	391.8	345.3	368.5	300.6	261.4	355.4
P09497-2	CLTB	Isoform Non-brain of Clathrin light chain B	Homo sapiens	Medium	1	38.7	55.7	52.7	55.6	55.2	47.4	73.9	64.3	40.2	55.9	75.9
Q00610	CLTC	Clathrin heavy chain 1	Homo sapiens	High	89	10409.9	11210.6	10396.6	9863	10150.2	10691.1	9302	9704.9	10066.3	10582.1	10074
O75153	CLUH	Clustered mitochondria protein homolog	Homo sapiens	High	41	3720.3	3436.2	2648.1	3004.3	2679.1	2890.5	2178.1	2297.4	3097	3005.2	2650.8
I3L2B0	CLUH	Clustered mitochondria protein homolog (Fragment)	Homo sapiens	High	4	527	374.9	281.4	377.9	381.4	399.7	212.5	252.4	347.3	364.3	366.7
Q8NFW8	CMAS	N-acylneuraminate cytidylyltransferase	Homo sapiens	High	11	642.6	651.1	784.5	664.7	759.1	712.5	654.5	698.9	677.9	720.1	735.6
Q9NRP2	CMC2	COX assembly mitochondrial protein 2 homolog	Homo sapiens	High	1	23.8	38.1	33.6	35.8	38.8	40.6	42	29.5	22.7	28.4	31.4
Q8IY22	CMIP	C-Maf-inducing protein	Homo sapiens	High	1	47.4	38.9	32.6	34.9	29	39.5	29.3	33.5	27.8	27.9	36.9
P30085	CMPK1	UMP-CMP kinase	Homo sapiens	High	11	1515.9	1051.8	997	1330.3	1157.8	1212.8	989.4	1140.2	1317.4	1419.5	1078.4
Q5EBM0	CMPK2	UMP-CMP kinase 2, mitochondrial	Homo sapiens	High	5	211.1	194.9	164.5	197.5	169.5	180.3	159.7	161.6	195.9	197.4	200.4
Q9BQ75	CMSS1	Protein CMSS1	Homo sapiens	High	6	300.5	451.7	322.3	249.5	270.3	449.3	399.8	388.5	261.4	282	493.4
Q8N1G2	CMTR1	Cap-specific mRNA (nucleoside-2'-O-)-methyltransferase 1	Homo sapiens	High	22	1666.9	1348.9	1546.4	1726.2	1437.9	1593.4	1357.3	1366.2	1916.2	1794.7	1495.2
Q8IYT2	CMTR2	Cap-specific mRNA (nucleoside-2'-O-)-methyltransferase 2	Homo sapiens	High	2	56.5	57.5	61.8	52.3	54	55.4	59.3	60.8	56.9	57.5	58.5
P62633	CNBP	Cellular nucleic acid-binding protein	Homo sapiens	High	6	888.3	758.9	732.1	755.5	743.3	319.2	317.5	272.8	738	918.9	277.9
Q96KP4	CNDP2	Cytosolic non-specific dipeptidase	Homo sapiens	High	23	2127.4	2495.9	2401.9	2294.1	2535.4	2244	2342.3	2454.2	2068.1	2294.6	2233.6
Q9P003	CNIH4	Protein cornichon homolog 4	Homo sapiens	High	1	86.3	56.2	85.6	94.3	50.8	59.7	46.6	42.3	115.6	85.4	64
Q99439	CNN2	Calponin-2	Homo sapiens	High	5	306.5	433.9	552.7	374.6	584.4	567.1	466.5	505.2	336.5	315.7	505.5
Q8NE01	CNNM3	Metal transporter CNNM3	Homo sapiens	High	2	80.7	63.9	41.9	67.4	41.8	49.6	35	29.1	60.9	73.9	45.4
H3BMZ2	CNOT1	CCR4-NOT transcription complex subunit 1 (Fragment)	Homo sapiens	High	1	41.2	33.9	22.4	33.3	19	31.1	22.7	19.1	34.6	46.1	27.6
A5YKK6	CNOT1	CCR4-NOT transcription complex subunit 1	Homo sapiens	High	45	3923	3602.7	3216.5	3854.6	3128.4	3639.8	2889.7	3026	4125.8	4002.9	3580
Q9H9A5	CNOT10	CCR4-NOT transcription complex subunit 10	Homo sapiens	High	6	392.3	318.7	294.1	326	267.1	266.3	213.2	216.3	352.2	372	241.8
Q9UKZ1	CNOT11	CCR4-NOT transcription complex subunit 11	Homo sapiens	High	4	86.6	76	67.2	79.6	72	77.2	50.8	61.1	96.3	66.6	61.7
Q9NZN8	CNOT2	CCR4-NOT transcription complex subunit 2	Homo sapiens	High	4	326.2	293.3	334.9	294.5	250.5	204.6	190.2	183.2	324	281	212.1
O75175	CNOT3	CCR4-NOT transcription complex subunit 3	Homo sapiens	High	8	646.6	609.9	530.5	631.6	542.2	661.1	461	541.6	684.8	682.5	621.7
O95628	CNOT4	CCR4-NOT transcription complex subunit 4	Homo sapiens	High	4	166.3	167.7	169.3	166.7	156.9	150	158.9	191.4	149	129.2	178.4
Q9ULM6	CNOT6	CCR4-NOT transcription complex subunit 6	Homo sapiens	High	1	51.3	27.4	41.6	40.9	32.3	28.4	44.4	45.8	52.9	39.5	20.8
Q96LI5	CNOT6L	CCR4-NOT transcription complex subunit 6-like	Homo sapiens	High	7	329.7	296.5	319.5	216.5	308.9	356.6	281.9	316.5	299.7	283.2	355.7
Q9UIV1	CNOT7	CCR4-NOT transcription complex subunit 7	Homo sapiens	High	5	628.1	384.4	390.7	532.7	400.8	362.9	257.1	283.6	561.7	512.1	342.9
P09543	CNP	2',3'-cyclic-nucleotide 3'-phosphodiesterase	Homo sapiens	High	13	1459.5	1475.1	1240.7	1249.2	1168.4	1228.2	1541.6	1391	1251.2	1141	1247.2
Q9Y2B0	CNPY2	Protein canopy homolog 2	Homo sapiens	High	10	499.2	477.5	579.9	567.6	450.7	558.1	629.2	658.4	543.2	441	569.3
Q9BT09	CNPY3	Protein canopy homolog 3	Homo sapiens	High	4	309	367.4	500	443.9	394.4	249.6	457.9	416	449.6	347.4	313.7
Q8N129	CNPY4	Protein canopy homolog 4	Homo sapiens	High	1	22.1	14.3	14.5	16.6	14.1	14.2	12.7	13.8	24	21.4	15.3
Q9Y2R0	COA3	Cytochrome c oxidase assembly factor 3 homolog, mitochondrial	Homo sapiens	High	3	133.4	262.9	207.9	168.9	187	306.8	273.1	231.8	210	166.3	252
Q96BR5	COA7	Cytochrome c oxidase assembly factor 7	Homo sapiens	High	4	295.9	348.7	283	324.3	304.8	353.7	419.4	440.4	285.8	274.5	370.8
Q13057	COASY	Bifunctional coenzyme A synthase	Homo sapiens	High	12	750.9	461.7	586.2	739.1	578.7	438.1	321.8	346.8	813.8	765.1	406.9
O75128	COBL	Protein cordon-bleu	Homo sapiens	Medium	1	65	9.1	10.4	26.6	17.9	6.1	5.4	5.5	20.3	91.2	9
Q8WTW3	COG1	Conserved oligomeric Golgi complex subunit 1	Homo sapiens	High	8	387.6	255.2	299.7	409.4	294.9	357.4	184	178.2	433.6	385.8	314.4
Q14746	COG2	Conserved oligomeric Golgi complex subunit 2	Homo sapiens	High	5	329.6	372	379.1	365.8	400	481.4	288.1	317.9	312.1	314.1	387.3
Q96JB2	COG3	Conserved oligomeric Golgi complex subunit 3	Homo sapiens	High	10	420.1	407.3	393.7	466.7	373.7	484.6	389.1	415.2	408	435.2	480.4
Q9H9E3	COG4	Conserved oligomeric Golgi complex subunit 4	Homo sapiens	High	10	344.4	289.7	286.2	351.7	284.1	341.2	215.9	218.5	405.2	401.2	331.9
Q9UP83	COG5	Conserved oligomeric Golgi complex subunit 5	Homo sapiens	High	8	242.1	344.2	250	264.7	269.1	359.7	450.5	465.2	244.1	264	371.9
Q9Y2V7	COG6	Conserved oligomeric Golgi complex subunit 6	Homo sapiens	High	7	600.6	397.3	393.6	555.7	403	395.3	306.2	304.8	558.6	575	422.7
P83436	COG7	Conserved oligomeric Golgi complex subunit 7	Homo sapiens	High	11	411.6	405.2	408.2	442.2	394.6	418.4	458.3	503.3	421.1	381.6	432.1
Q96MW5	COG8	Conserved oligomeric Golgi complex subunit 8	Homo sapiens	High	8	306.1	252.4	232.7	239.3	216.2	272.4	171.3	179.3	333.4	302.1	270.1
P38432	COIL	Coilin	Homo sapiens	High	2	105.8	93.2	89.8	100.9	85.1	93.9	79.4	76.6	114.2	109	92.1
A0A0G2JHD9	COL11A2	Collagen alpha-2(XI) chain (Fragment)	Homo sapiens	Medium	1	27.1	92.3	40.5	35.2	34.8	544.8	358.5	370.9	42.8	28.8	588.3
Q9Y5P4	COL4A3BP	Collagen type IV alpha-3-binding protein	Homo sapiens	High	17	663.6	685.9	688.7	669.4	624.7	711.5	593.8	627.2	742.4	802.3	662.5
Q8NBJ5	COLGALT1	Procollagen galactosyltransferase 1	Homo sapiens	High	12	658.2	573.2	654.1	756.8	643.3	614.7	635.4	614.8	710.1	724	683.5
Q8N668	COMMD1	COMM domain-containing protein 1	Homo sapiens	High	3	122.1	158.8	112.8	165.2	118.4	144.9	83.9	83.4	136.6	164.5	115
Q9Y6G5	COMMD10	COMM domain-containing protein 10	Homo sapiens	High	3	99.5	118.2	141.6	134	130.1	140.9	172.1	169.3	120	131.5	128.2
Q86X83	COMMD2	COMM domain-containing protein 2	Homo sapiens	High	7	799.1	657.1	644.7	654.5	638.9	621.1	534.8	553.5	806.2	869.9	600.4
Q9UBI1	COMMD3	COMM domain-containing protein 3	Homo sapiens	High	4	346.9	256.6	338.1	342.1	325.1	231.9	203.3	178	365.9	400.8	203.8
Q9H0A8	COMMD4	COMM domain-containing protein 4	Homo sapiens	High	7	373.7	381.5	393.3	427.9	391.7	390	322.1	313.4	433.4	444.3	352
Q9GZQ3	COMMD5	COMM domain-containing protein 5	Homo sapiens	High	2	43.2	42.1	39.2	33.4	36.1	42.3	29.2	34.5	47.2	52.1	44.3
Q7Z4G1	COMMD6	COMM domain-containing protein 6	Homo sapiens	High	1	24.1	39.5	24.7	27.8	30.4	68.5	42.8	38.7	24.8	37.4	61.4
Q86VX2	COMMD7	COMM domain-containing protein 7	Homo sapiens	High	1	26.7	33.6	38.8	43.5	36.9	44.7	54.1	52.7	29.5	37.8	42.6
Q9P000	COMMD9	COMM domain-containing protein 9	Homo sapiens	High	1	21.8	15.4	11.1	12.7	9.4	19	6.2	8.4	15.8	17.2	14.8
P21964	COMT	Catechol O-methyltransferase	Homo sapiens	High	14	1127.5	1193.1	1126.2	1146.1	990.9	998	1096.4	1031.9	1031.3	1430.2	1051.7
P53621	COPA	Coatomer subunit alpha	Homo sapiens	High	60	6778.8	5628.4	5969.3	6278.1	5754.1	5458.2	4707.2	4862.5	6944.2	6804.1	5221.5
P53618	COPB1	Coatomer subunit beta	Homo sapiens	High	43	4056.1	4434.8	3871.5	4174.9	3923.7	4689	4175.6	4274.6	4055.1	4199.9	4846
P35606	COPB2	Coatomer subunit beta'	Homo sapiens	High	40	2850.3	3063.5	3052.1	2815.7	3121	3054.6	3079.6	3193.2	2881.7	2980.8	2999.4
O14579	COPE	Coatomer subunit epsilon	Homo sapiens	High	21	2212.5	1466.5	1555.8	2109.5	1587.1	1227.4	1047.7	1078.8	2153.9	2160.1	1256.1
Q9Y678	COPG1	Coatomer subunit gamma-1	Homo sapiens	High	32	2784.4	3209	2512.2	2686	2532.4	3115.4	2784.7	2854.1	2484.7	2646.9	3107.8
Q9UBF2	COPG2	Coatomer subunit gamma-2	Homo sapiens	High	20	1183.4	1246.6	897.8	1095.7	844.2	1166.4	771	751.8	1106	1250.7	1189.3
P61201	COPS2	COP9 signalosome complex subunit 2	Homo sapiens	High	21	1654.2	1689	1669.8	1227.2	1841.2	1879.7	2084.7	2181.5	1632.4	1438.3	1779.5
Q9UNS2	COPS3	COP9 signalosome complex subunit 3	Homo sapiens	High	9	641	561.2	531.6	607.9	503.5	491.7	426.1	416.7	638.1	657.2	472
Q9BT78	COPS4	COP9 signalosome complex subunit 4	Homo sapiens	High	20	1750.4	1782.5	1650.2	1766.6	1707	1613.5	1441.2	1508.9	1717.7	1842.8	1562.3
Q92905	COPS5	COP9 signalosome complex subunit 5	Homo sapiens	High	12	1016.8	1146.6	1057.8	1089.8	1154.7	1341.2	1257.8	1351.5	1051.1	1123	1264.2
Q7L5N1	COPS6	COP9 signalosome complex subunit 6	Homo sapiens	High	8	833.1	916	842.2	961.2	866.2	872.4	705.4	705.4	883.7	938.9	797.6
Q9UBW8	COPS7A	COP9 signalosome complex subunit 7a	Homo sapiens	High	7	348.7	337.8	261.2	355.6	267.3	325	234.5	243.8	346.2	438.6	328.7
Q9H9Q2	COPS7B	COP9 signalosome complex subunit 7b	Homo sapiens	High	4	261.7	196.8	165.1	221.5	142	169.1	92.3	73.6	242.2	218.2	161
Q99627	COPS8	COP9 signalosome complex subunit 8	Homo sapiens	High	6	296.6	362	337.2	347	345.7	404.8	462.7	476.3	348	398.4	378.9
Q8WXC6	COPS9	COP9 signalosome complex subunit 9	Homo sapiens	High	1	19.3	17.7	13.3	15.9	8.8	15.5	9.9	12.6	17.1	22.8	11.4
P61923	COPZ1	Coatomer subunit zeta-1	Homo sapiens	High	4	198.2	240.2	269.6	247.3	326.3	241.6	211.4	249.5	242	237.3	199.5
Q96H96	COQ2	4-hydroxybenzoate polyprenyltransferase, mitochondrial	Homo sapiens	High	1	41.1	41.2	36.2	44.1	36.2	59.2	54.3	59.2	37.2	30.5	53.3
Q9NZJ6	COQ3	Ubiquinone biosynthesis O-methyltransferase, mitochondrial	Homo sapiens	High	2	167.6	155.5	181.2	188.6	194.6	170.7	214	202.7	191.6	188.6	194.4
Q5HYK3	COQ5	2-methoxy-6-polyprenyl-1,4-benzoquinol methylase, mitochondrial	Homo sapiens	High	10	569.7	380.8	521.6	575.1	502.5	373.5	452.4	476.9	649.5	570.9	433.8
Q9Y2Z9	COQ6	Ubiquinone biosynthesis monooxygenase COQ6, mitochondrial	Homo sapiens	High	4	332.8	242.6	252.2	323.9	218.2	392.2	296	272.1	410.5	373.7	394.1
Q8NI60	COQ8A	Atypical kinase COQ8A, mitochondrial	Homo sapiens	High	8	638.6	526.7	404.6	490.7	382.7	475.5	369.1	367.6	556.4	517.1	441.6
Q96D53	COQ8B	Atypical kinase COQ8B, mitochondrial	Homo sapiens	High	6	164.6	109.5	101.5	159.1	108.1	173.5	166.2	188.3	187.2	153.3	167.1
O75208	COQ9	Ubiquinone biosynthesis protein COQ9, mitochondrial	Homo sapiens	High	3	222.1	156.9	170.8	222.9	151.7	143.6	107.9	116.6	262.3	250.9	133.6
P31146	CORO1A	Coronin-1A	Homo sapiens	High	29	2540.6	2902.7	3355.8	2857.1	3497.4	3192.8	3211.8	3081.1	2705.3	3046.5	3237.6
Q9BR76	CORO1B	Coronin-1B	Homo sapiens	High	4	147.7	132.7	147	169.7	132.8	156.7	102.5	108.5	168.7	148.2	137.9
Q9ULV4	CORO1C	Coronin-1C	Homo sapiens	High	16	1317.6	1465.2	1518.4	1307.5	1495.4	1257	1311.2	1196.6	1320.5	1419	1373.4
P57737	CORO7	Coronin-7	Homo sapiens	High	16	897.9	932.9	810.8	879.3	766	836	636.8	629.1	1073.5	1157.7	830.5
Q12887	COX10	Protoheme IX farnesyltransferase, mitochondrial	Homo sapiens	High	1	45.5	24.1	28.9	38.9	28.7	24.3	24.9	26.8	48.1	36.2	29.4
Q9Y6N1	COX11	Cytochrome c oxidase assembly protein COX11, mitochondrial	Homo sapiens	High	4	129.5	244.1	133.6	134.3	122.5	351.1	309.7	305.1	95.6	126.9	333.6
Q7KZN9	COX15	Cytochrome c oxidase assembly protein COX15 homolog	Homo sapiens	High	6	464.2	389.6	477.1	479.5	440.9	481.2	559.1	619.9	455.9	446.7	520.6
Q9P0S2	COX16	Cytochrome c oxidase assembly protein COX16 homolog, mitochondrial	Homo sapiens	High	1	71.1	58	45.7	67	58	43.3	27.9	28.3	68.7	62.1	29.5
Q8N8Q8	COX18	Mitochondrial inner membrane protein COX18	Homo sapiens	High	1	29.4	23.9	23.5	29.8	18.9	38	17	24	35.8	24.8	25
Q49B96	COX19	Cytochrome c oxidase assembly protein COX19	Homo sapiens	High	1	17.6	36.5	31.1	27	34.7	49.2	56	51.5	22.3	26.7	53.9
Q5RI15	COX20	Cytochrome c oxidase protein 20 homolog	Homo sapiens	High	3	210.2	177.3	220.1	231.3	220.6	178	235.8	252.2	210.8	229.8	212.4
P13073	COX4I1	Cytochrome c oxidase subunit 4 isoform 1, mitochondrial	Homo sapiens	High	10	2262.9	2037	2648.9	2324.1	2772.3	2026.6	3237.8	3253.4	2267.9	2568.1	1989.6
P20674	COX5A	Cytochrome c oxidase subunit 5A, mitochondrial	Homo sapiens	High	6	351	578.3	525.2	513.2	599.1	623.7	821	659.9	456.7	411	523.8
P10606	COX5B	Cytochrome c oxidase subunit 5B, mitochondrial	Homo sapiens	High	4	305.5	676.2	969	673.3	1113.3	582.6	1733.4	1608.7	520.6	471.4	582.2
P14854	COX6B1	Cytochrome c oxidase subunit 6B1	Homo sapiens	High	2	83.5	113.5	85.2	82.1	80.1	98.3	65.1	46.5	86.1	82.2	68.4
P09669	COX6C	Cytochrome c oxidase subunit 6C	Homo sapiens	High	6	472.9	585.8	694.3	691.9	716.2	589.8	704.8	722.6	664.4	482.4	528.9
P14406	COX7A2	Cytochrome c oxidase subunit 7A2, mitochondrial	Homo sapiens	High	3	107.2	137.3	148.9	124.8	144.7	114.8	107.7	90.6	142.4	137.7	102.9
O14548	COX7A2L	Cytochrome c oxidase subunit 7A-related protein, mitochondrial	Homo sapiens	High	6	130	256.5	270	214.1	336.4	308.9	475.9	428.5	195.5	183.1	276.9
P24311	COX7B	Cytochrome c oxidase subunit 7B, mitochondrial	Homo sapiens	High	2	155.7	309.9	355.5	262.7	425.2	392.2	1065.2	838.5	201.4	201	303.9
P15954	COX7C	Cytochrome c oxidase subunit 7C, mitochondrial	Homo sapiens	Medium	2	78.1	113.6	183.9	134.2	270.4	157.6	249	242.4	113.4	108.7	125.6
O75976	CPD	Carboxypeptidase D	Homo sapiens	High	6	340.4	315.6	189.5	255.6	192.6	242.5	185.7	185.3	314.6	240	222.7
Q9BZB8	CPEB1	Cytoplasmic polyadenylation element-binding protein 1	Homo sapiens	High	2	45	39	25.6	33.9	29.7	43.5	23.4	26	44	50.6	30.8
Q99829	CPNE1	Copine-1	Homo sapiens	High	18	1528.4	1382.3	1583.5	1622.1	1584.5	1656.9	1520	1602.2	1620.7	1660.1	1691.7
O75131	CPNE3	Copine-3	Homo sapiens	High	17	1747	1807.7	1601.9	1746.1	1539.1	1550.8	1321.2	1342.2	1740.8	1827.3	1540
P36551	CPOX	Oxygen-dependent coproporphyrinogen-III oxidase, mitochondrial	Homo sapiens	High	16	1551.5	1482.9	1369.6	1651.7	1370.5	1207.8	1005.3	914.7	1560.9	1626.8	1192.2
Q9BRF8	CPPED1	Serine/threonine-protein phosphatase CPPED1	Homo sapiens	High	3	40.5	59.4	28.9	33.9	24.2	43.8	19.8	22.6	38.9	60.4	52.2
P31327	CPS1	Carbamoyl-phosphate synthase [ammonia], mitochondrial	Homo sapiens	High	3	93.3	97.3	94.1	99	96.1	96.6	114.4	116.6	100.4	79.6	103.9
Q10570	CPSF1	Cleavage and polyadenylation specificity factor subunit 1	Homo sapiens	High	33	1921.1	1528	1900	1907.2	1696.5	1551.8	1447	1437.4	2056.4	2084.3	1545.8
Q9P2I0	CPSF2	Cleavage and polyadenylation specificity factor subunit 2	Homo sapiens	High	29	1668.2	1570.5	1441.5	1573.7	1303	1549.3	1236.6	1277.1	1829.8	1905.4	1536.3
Q9UKF6	CPSF3	Cleavage and polyadenylation specificity factor subunit 3	Homo sapiens	High	21	1736.1	1392.5	1463.1	1569.1	1474.9	1265.2	1242.1	1329.7	1578.6	1717.2	1222.8
Q5TA45	CPSF3L	Integrator complex subunit 11	Homo sapiens	High	7	423.8	320	368.3	427.3	348.6	322.6	307.7	313.3	428.9	371.9	325.4
H0YEQ9	CPSF3L	Integrator complex subunit 11 (Fragment)	Homo sapiens	Medium	1	306.3	122.9	121.6	251.3	153.3	62.6	16.4	15.2	214.9	384.3	74.4
O95639	CPSF4	Cleavage and polyadenylation specificity factor subunit 4	Homo sapiens	High	3	128.8	139.3	137.2	139.8	139.2	169.4	132.6	136.1	115.5	131.9	131.7
Q16630	CPSF6	Cleavage and polyadenylation specificity factor subunit 6	Homo sapiens	High	11	1393.2	1543.8	1491.1	1632.5	1376.6	1561.4	1285.4	1299.6	1575.9	1465.4	1516.2
Q8N684	CPSF7	Cleavage and polyadenylation specificity factor subunit 7	Homo sapiens	High	7	278.3	263.2	271.3	284	277.3	247.7	240.6	236.7	278	304.6	265.6
P50416	CPT1A	Carnitine O-palmitoyltransferase 1, liver isoform	Homo sapiens	High	21	1518.9	1207.6	1480.6	1602.5	1364.9	1283.9	1299.7	1276	1730.9	1685.3	1261.7
P23786	CPT2	Carnitine O-palmitoyltransferase 2, mitochondrial	Homo sapiens	High	20	1381.8	1261.2	1675.8	1619.2	1518.3	1396.5	1692.8	1569.1	1664.3	1558.4	1529.6
Q9H3G5	CPVL	Probable serine carboxypeptidase CPVL	Homo sapiens	Medium	1	12.5	11.6	33.5	47.4	23.7	27.3	18	18.4	32.7	28.2	21.5
Q9BSW2-2	CRACR2A	Isoform 2 of EF-hand calcium-binding domain-containing protein 4B	Homo sapiens	High	2	41.7	63.8	38.4	49.5	41.6	78	53.1	54	46.4	71.6	85.5
Q9BSW2	CRACR2A	EF-hand calcium-binding domain-containing protein 4B	Homo sapiens	High	2	78.6	83.7	72.7	82.2	61.3	95.3	86.3	91.1	82	78	104.4
P78560	CRADD	Death domain-containing protein CRADD	Homo sapiens	High	3	125.5	69.7	89	102	82.8	49.6	31.1	30.7	130.4	100.5	54.3
P16220	CREB1	Cyclic AMP-responsive element-binding protein 1	Homo sapiens	High	1	126.9	129.5	112.5	160.6	94.8	88.8	47.3	43.6	200.1	155.9	98.3
Q92793	CREBBP	CREB-binding protein	Homo sapiens	High	1	32.7	17.4	27.5	30.1	17.3	23.9	11.6	13.6	31	29.5	18.3
O75629	CREG1	Protein CREG1	Homo sapiens	High	1	38.3	39.2	21.9	28.4	20.1	8.7	3.5	4.4	27.6	50.9	9.3
P50238	CRIP1	Cysteine-rich protein 1	Homo sapiens	High	3	538.6	397.4	694.9	579.6	763.7	406.8	441.3	421.9	542.8	589.9	362.8
Q9P021	CRIPT	Cysteine-rich PDZ-binding protein	Homo sapiens	High	3	73.4	91	78.2	56	91.8	106	162.5	171.5	52.4	65.2	112.2
P46108	CRK	Adapter molecule crk	Homo sapiens	High	9	361.6	425.4	294.7	254.2	316.6	381.5	300.9	326.3	324.5	364.9	395.6
P46109	CRKL	Crk-like protein	Homo sapiens	High	14	1236.6	1270.6	1348.3	1176.3	1386.5	1167.5	1090.9	1153.4	1270.1	1355.3	1177.6
Q8IUI8	CRLF3	Cytokine receptor-like factor 3	Homo sapiens	High	2	58.9	67.3	44.8	52.8	34.6	62.5	41.2	34.5	59.5	64.8	69.3
Q9BZJ0	CRNKL1	Crooked neck-like protein 1	Homo sapiens	High	30	2437.4	2362.9	2376	2560.9	2405.4	2382.8	2338.9	2389.6	2347.1	2667.3	2383.5
Q5TZA2	CROCC	Rootletin	Homo sapiens	High	1	27	26.5	27.7	27.7	23.5	47.5	37.4	47	22.6	24.3	44
Q9UKG9	CROT	Peroxisomal carnitine O-octanoyltransferase	Homo sapiens	High	2	16.5	28.1	31.6	30.8	24.8	26	33.6	37.9	20.3	25.1	34.2
O75718	CRTAP	Cartilage-associated protein	Homo sapiens	High	10	711.5	633.4	690.6	808.2	622.8	708.5	770.2	735.2	860.8	724.7	726.9
Q53ET0	CRTC2	CREB-regulated transcription coactivator 2	Homo sapiens	High	3	109.2	83.6	90.3	95.1	80	72.4	61.9	58.6	112.7	104.6	78
Q08257	CRYZ	Quinone oxidoreductase	Homo sapiens	High	17	1754.5	1761.5	1672.9	1518.4	1681.6	1490.8	1869.8	1926.9	1711	1814.3	1440.7
O95825	CRYZL1	Quinone oxidoreductase-like protein 1	Homo sapiens	High	3	91.8	99	86.4	94.6	102.9	130.4	108.4	115.7	96.1	87.8	130.4
H7C2K1	CRYZL1	Quinone oxidoreductase-like protein 1 (Fragment)	Homo sapiens	Medium	1	90.4	44.1	53.3	124.8	63.4	47.6	7.9	12	105.1	117.5	50.7
O75390	CS	Citrate synthase, mitochondrial	Homo sapiens	High	22	2584.3	2526.3	2676.1	2855.7	2547.9	2371.1	3049.5	2726.5	2623.3	2652.6	2734.9
O75534	CSDE1	Cold shock domain-containing protein E1	Homo sapiens	High	37	4286.5	3952	3783.5	3916.7	3549.9	3317	3804.7	3714.7	3646.4	3628.4	3335
P55060	CSE1L	Exportin-2	Homo sapiens	High	43	4039.6	3971.8	4012	3354.4	4007.4	3699.1	3772.3	3826.3	3840.1	3610.2	3692
Q8N6G5	CSGALNACT2	Chondroitin sulfate N-acetylgalactosaminyltransferase 2	Homo sapiens	High	1	10	7.9	8.6	12.5	10.1	22.8	23.3	17.5	11.9	13.1	22.3
P41240	CSK	Tyrosine-protein kinase CSK	Homo sapiens	High	19	1954.5	2072.3	1946.9	1989.1	1954.3	2016.5	1954.8	2031.9	1998.1	2170.7	1928.1
P48729	CSNK1A1	Casein kinase I isoform alpha	Homo sapiens	High	13	1805.4	1416.6	1363.4	1495.3	1410.7	1257.6	1144.5	1271.2	1450.1	1428.7	1275.5
P48730	CSNK1D	Casein kinase I isoform delta	Homo sapiens	High	1	13	11.6	12	12.3	13.5	16	13.1	16.2	13.4	16.8	12.2
P49674	CSNK1E	Casein kinase I isoform epsilon	Homo sapiens	High	1	357.9	336.2	277.6	289.4	280.5	291.3	251.4	251.1	331.4	327	273.6
Q9HCP0	CSNK1G1	Casein kinase I isoform gamma-1	Homo sapiens	High	1	23	34.2	21.6	22	26.3	38.6	26.3	24.5	25.7	28.6	40.9
Q9Y6M4	CSNK1G3	Casein kinase I isoform gamma-3	Homo sapiens	High	1	322.2	169.2	170.7	203.6	178.4	130.3	153.1	139.4	262.5	247.6	135.5
P68400	CSNK2A1	Casein kinase II subunit alpha	Homo sapiens	High	18	2695.9	2427	2398.9	2677.9	2513.7	1962.4	1658.2	1702.2	2346.6	2353.1	1751.1
P19784	CSNK2A2	Casein kinase II subunit alpha'	Homo sapiens	High	17	1564.9	1235.8	1347.8	1357.1	1419.7	1207.3	1052.9	1038.5	1447.5	1505.8	1136.1
P67870	CSNK2B	Casein kinase II subunit beta	Homo sapiens	High	6	1214.9	998.2	1061.9	1147.5	987.9	789	869.2	887.4	1077.2	946.2	793.8
P21291	CSRP1	Cysteine and glycine-rich protein 1	Homo sapiens	High	7	452.9	506.9	453.4	462.6	457.8	344.7	335.1	316	495.8	633.5	306.4
P01037	CST1	Cystatin-SN	Homo sapiens	High	2	78.1	77.1	104.3	86.9	81.4	97.4	204.6	87.5	73	91.7	82.3
P01040	CSTA	Cystatin-A	Homo sapiens	High	1	32.6	54.7	55.8	85.2	74.7	48	45.2	51.5	36.4	41.7	52.4
P04080	CSTB	Cystatin-B	Homo sapiens	High	5	505.3	657.6	739.2	263.9	803.8	771.2	1217.2	1172.9	554	555.9	633.4
Q05048	CSTF1	Cleavage stimulation factor subunit 1	Homo sapiens	High	14	1793.1	1473	1384.9	1598.4	1368.8	1486.5	1109.4	1131.1	1903.8	2019.1	1302.9
P33240	CSTF2	Cleavage stimulation factor subunit 2	Homo sapiens	High	4	767.7	622.1	615.8	777.9	609.1	501.2	408.1	404.5	830.5	884.7	477.1
Q12996	CSTF3	Cleavage stimulation factor subunit 3	Homo sapiens	High	23	1443.9	1428.3	1502.9	1510.6	1487.9	1485.7	1377	1398	1506.8	1580.7	1507.2
Q13363	CTBP1	C-terminal-binding protein 1	Homo sapiens	High	11	695.2	605.6	619.3	715.7	575.5	548.6	451.9	435.3	796.9	836.8	530.3
P49711	CTCF	Transcriptional repressor CTCF	Homo sapiens	High	10	1468.6	872	1515.3	946.2	1397.1	998.2	1507.8	1570.4	1379.7	1323.6	990.2
Q8NI51	CTCFL	Transcriptional repressor CTCFL	Homo sapiens	High	1	89.1	91.4	90.8	98.6	92.5	85.4	75.5	70.2	110.9	119.8	91.8
Q9Y5B0	CTDP1	RNA polymerase II subunit A C-terminal domain phosphatase	Homo sapiens	High	8	409.1	281.6	289	278.1	276.3	292.2	274	311.8	372.5	311.9	491.8
Q05D32	CTDSPL2	CTD small phosphatase-like protein 2	Homo sapiens	High	7	490.3	508.3	752.5	549.8	672.1	1387.2	1059.5	1072.3	591.8	521.4	1314
P32929	CTH	Cystathionine gamma-lyase	Homo sapiens	Medium	1	27.4	33.6	26.6	25.6	20.5	41.1	22.3	25.9	27.9	23.5	34.5
Q96CG8	CTHRC1	Collagen triple helix repeat-containing protein 1	Homo sapiens	High	1	73.5	40.4	47	72.6	55.5	56.9	34.8	35.3	84.8	68.8	51
P35221	CTNNA1	Catenin alpha-1	Homo sapiens	High	5	156.8	165.2	139.8	205.9	135.1	173	114.1	107.3	206.2	188.4	144.5
P35222	CTNNB1	Catenin beta-1	Homo sapiens	High	2	110.9	79.7	79.5	129.2	83.2	120.3	64.4	54.6	96.9	81.6	97.2
Q8WYA6	CTNNBL1	Beta-catenin-like protein 1	Homo sapiens	High	20	2750.8	2324	2615.2	2544.3	2642.1	2663.2	3338.5	3413.2	2865.2	2450.9	2782.5
P17812	CTPS1	CTP synthase 1	Homo sapiens	High	29	3379.4	3180.7	3063.2	2867.3	3227.8	2624.8	2671.4	2717.9	3077.7	3259.4	2508.5
Q6PD62	CTR9	RNA polymerase-associated protein CTR9 homolog	Homo sapiens	High	22	1651.3	1323.2	1316.3	1407.5	1238.9	1439.2	1168.7	1275	1514.8	1460.3	1379.4
P10619	CTSA	Lysosomal protective protein	Homo sapiens	High	8	363.3	285.5	420.7	416.3	467	305.9	368.3	360.2	351	329.4	274.5
P07858	CTSB	Cathepsin B	Homo sapiens	High	4	308	306.7	411.6	360.8	423.1	264	345.7	310.3	331.2	314.4	295.9
P53634	CTSC	Dipeptidyl peptidase 1	Homo sapiens	High	9	396	622.2	538.8	462.6	477.7	555.9	688.5	674.8	396.1	501.1	536.8
Q7Z7A3	CTU1	Cytoplasmic tRNA 2-thiolation protein 1	Homo sapiens	High	3	376.8	224.4	217.5	323.5	212.8	329.8	129.1	136.9	350.6	369.9	282
Q2VPK5	CTU2	Cytoplasmic tRNA 2-thiolation protein 2	Homo sapiens	High	8	325	268.3	267.4	300.1	248.5	238.2	242.6	272.1	304.8	327.3	250.9
Q9H467	CUEDC2	CUE domain-containing protein 2	Homo sapiens	Medium	1	32.3	21.7	23.9	25.9	38.4	31.2	22	21.2	21.3	32.1	24.7
Q13616	CUL1	Cullin-1	Homo sapiens	High	24	897.4	855.2	778.9	823.4	771.2	889.1	806.9	848.6	820.4	845.5	897.9
Q13617	CUL2	Cullin-2	Homo sapiens	High	24	2976.3	2196	2269.1	2580	2115.8	2081.7	1581.5	1633.3	2642.1	2612	1938.7
Q13618	CUL3	Cullin-3	Homo sapiens	High	30	2636.2	2387.7	2338.6	2456.3	2259	2321.3	1973	2066.3	2672.9	2484.6	2346.8
Q13619	CUL4A	Cullin-4A	Homo sapiens	High	12	697.9	574.8	591.9	624.3	613.7	507	587.5	623.8	551.1	533	533.4
Q13620	CUL4B	Cullin-4B	Homo sapiens	High	19	1835.9	1648.3	1784	1765.7	1686.1	1450.7	1361.3	1398.8	1759.3	1682.6	1431.7
Q93034	CUL5	Cullin-5	Homo sapiens	High	17	789.4	1025.1	865.2	807.5	835.6	1216.4	1355.3	1460.5	769	802.5	1294.7
Q8IWT3	CUL9	Cullin-9	Homo sapiens	High	5	29.8	17.8	17.6	26	13.9	25.5	7.9	11.3	29.3	23	17.2
O60888	CUTA	Protein CutA	Homo sapiens	High	4	121	125	132.8	181.9	144.8	168.1	140.7	158.6	180.4	155	139.8
Q9NTM9	CUTC	Copper homeostasis protein cutC homolog	Homo sapiens	High	6	402.4	262.4	274.1	327.8	264	201.1	159.1	184.3	314.7	345.5	205.9
Q13948	CUX1	Protein CASP	Homo sapiens	High	2	100.4	57.2	85.2	79.7	69.7	171.8	162.9	164.3	98.2	84.4	171.8
P39880	CUX1	Homeobox protein cut-like 1	Homo sapiens	High	3	363.5	321.8	316.6	372.5	296.1	335.9	300.6	334.4	380.7	332.4	315.8
Q9P013	CWC15	Spliceosome-associated protein CWC15 homolog	Homo sapiens	High	5	174.6	169.8	176	178.9	171.8	174.5	167.2	171.7	157.9	158.1	181.6
Q9HCG8	CWC22	Pre-mRNA-splicing factor CWC22 homolog	Homo sapiens	High	11	631.8	612.6	527.5	592.4	566.8	681	613.5	625.2	605.6	538.6	678.6
Q9NXE8	CWC25	Pre-mRNA-splicing factor CWC25 homolog	Homo sapiens	High	3	61.9	48.2	39	53.8	41	47.5	43.3	45.5	56.2	47.7	45.5
Q6UX04	CWC27	Peptidyl-prolyl cis-trans isomerase CWC27 homolog	Homo sapiens	High	11	951.4	776.8	788.4	781.8	725.6	765.3	624.9	626.6	962.1	939.1	752.9
Q69YN2	CWF19L1	CWF19-like protein 1	Homo sapiens	High	13	679.5	862	755.4	556	768.2	818.7	692	765.6	650.4	707.5	752.3
Q2TBE0	CWF19L2	CWF19-like protein 2	Homo sapiens	High	3	109.5	117.9	110.4	106.4	94.3	96.5	75.2	89.1	119.7	121.1	80.5
Q8TB03	CXorf38	Uncharacterized protein CXorf38	Homo sapiens	High	7	164.6	241.9	184.6	170.5	171.5	252.5	191.8	204.1	182.3	208.5	254.3
Q9H5V9	CXorf56	UPF0428 protein CXorf56	Homo sapiens	High	2	97.1	94.8	86.3	101.4	92.3	105	57.2	57.1	116.5	126.4	81.7
Q9P0U4	CXXC1	CXXC-type zinc finger protein 1	Homo sapiens	High	5	180.2	150.3	150	165.3	146.5	156.2	109.9	123.5	193.6	206.3	148.4
O14569	CYB561D2	Cytochrome b561 domain-containing protein 2	Homo sapiens	High	1	45.6	24.3	43.4	53.6	34.3	13.1	15.6	12.3	53.6	58.8	13.6
O43169	CYB5B	Cytochrome b5 type B	Homo sapiens	High	6	569	701.9	950.5	766.4	921.3	386.9	453.7	419.2	751.3	685.4	369.2
Q9UHQ9	CYB5R1	NADH-cytochrome b5 reductase 1	Homo sapiens	High	8	606.3	532.2	612.6	584.5	616.3	609.9	661.8	665.8	624.3	575.2	629.5
P00387	CYB5R3	NADH-cytochrome b5 reductase 3	Homo sapiens	High	17	2327.9	1393.6	2010.9	2360	1737.4	1390.1	1538.9	1503.7	2375.6	2198.3	1477.7
Q7L1T6	CYB5R4	Cytochrome b5 reductase 4	Homo sapiens	High	2	48.7	33.9	47.5	44.9	49.4	30.8	33.4	29.5	58.2	47.8	35.6
P13498	CYBA	Cytochrome b-245 light chain	Homo sapiens	Medium	1	131.8	88.6	119.6	129.8	90.6	101.7	73.8	85.5	205.3	106.3	94.5
P08574	CYC1	Cytochrome c1, heme protein, mitochondrial	Homo sapiens	High	12	1001.9	762.1	1008.6	1016.6	948.2	869.7	760.3	728	893.9	754.9	847
Q7L576	CYFIP1	Cytoplasmic FMR1-interacting protein 1	Homo sapiens	High	1	152.4	154.5	123.5	147.1	127	161.3	86.6	103.3	171.8	188.3	172.8
Q96F07	CYFIP2	Cytoplasmic FMR1-interacting protein 2	Homo sapiens	High	19	2831.9	2669.2	2520.9	2711.2	2443.7	2696.8	2350	2444.4	2778.3	2733.8	2811
Q6UW02	CYP20A1	Cytochrome P450 20A1	Homo sapiens	High	4	223.4	254.7	244.9	251.6	229.8	282.4	261.4	243.6	214.8	225.9	318.6
Q16850	CYP51A1	Lanosterol 14-alpha demethylase	Homo sapiens	High	6	362.9	273.3	627	504.2	589.5	357.8	633.6	596	465.8	398.2	444.7
Q9H1C7	CYSTM1	Cysteine-rich and transmembrane domain-containing protein 1	Homo sapiens	High	1	28	41.9	22.5	25.9	20.4	252.4	69	80.9	25.5	21.7	200.9
Q15438	CYTH1	Cytohesin-1	Homo sapiens	High	5	203.1	197.9	193.3	223.7	176.6	187.4	125	116.4	276.3	260.6	181.8
Q8N465	D2HGDH	D-2-hydroxyglutarate dehydrogenase, mitochondrial	Homo sapiens	High	3	169.1	121.1	147.9	206.2	131.5	121.7	88.8	84.4	230.1	236.4	115.3
Q9UI36	DACH1	Dachshund homolog 1	Homo sapiens	High	1	26.1	16.6	23	23.7	14.7	26.5	13.3	13.7	21.3	24.7	21.3
P61803	DAD1	Dolichyl-diphosphooligosaccharide--protein glycosyltransferase subunit DAD1	Homo sapiens	High	3	126.5	125.1	190.9	186	175.9	139.2	156.7	150.8	222.8	227.5	135.8
Q14118	DAG1	Dystroglycan	Homo sapiens	High	2	115.9	85	63.9	86.9	59.7	73.3	54.5	57.5	102.2	104.9	66.3
Q8NCG7	DAGLB	Sn1-specific diacylglycerol lipase beta	Homo sapiens	High	3	347.7	211.5	207.7	292.1	215	204	139.7	143.5	322.2	290.5	198.9
Q5D0E6	DALRD3	DALR anticodon-binding domain-containing protein 3	Homo sapiens	High	2	21.6	11.7	17.2	10.4	14.4	14.1	14.7	10.7	12.9	11.4	13.6
P51398	DAP3	28S ribosomal protein S29, mitochondrial	Homo sapiens	High	17	1390.4	1072	1313.1	1559.5	1233.5	1078.6	1213.9	1120.1	1511.8	1360.9	1068
P53355	DAPK1	Death-associated protein kinase 1	Homo sapiens	High	1	75	60	80.1	61.7	83.7	79.3	116.6	123.3	69	62.1	89.5
O43293	DAPK3	Death-associated protein kinase 3	Homo sapiens	High	1	45.6	23.8	23.4	39.8	27.3	23.2	13.2	12.3	40.9	31.7	24.1
P14868	DARS	Aspartate--tRNA ligase, cytoplasmic	Homo sapiens	High	35	6025.8	5594.8	5528.1	5549.4	5507.7	5204.9	4900	4892.4	6033.8	5978.3	5232.7
Q6PI48	DARS2	Aspartate--tRNA ligase, mitochondrial	Homo sapiens	High	22	1345.3	1087.1	1205.1	1455.6	1199	1086.3	1173.9	1180.6	1495.7	1295.7	1179.2
Q9UER7	DAXX	Death domain-associated protein 6	Homo sapiens	High	10	426.8	336.5	317.9	344.8	270.1	309.7	214.2	222.2	384	419.6	303.7
Q96EP5	DAZAP1	DAZ-associated protein 1	Homo sapiens	High	10	1509.4	1286.1	1300.6	1285.5	1326.2	1288	1175	1343	1208	1462.9	1209
P07108	DBI	Acyl-CoA-binding protein	Homo sapiens	High	5	221.5	498.4	467.6	347.2	449.8	779.4	665.2	663.5	260.5	238	398.8
Q16643	DBN1	Drebrin	Homo sapiens	High	18	1087.8	1106.8	1039.5	1022.7	1183.5	1159.7	1024.8	1115.6	1103.8	1183.1	1200.9
Q9UJU6	DBNL	Drebrin-like protein	Homo sapiens	High	14	651.8	672	675.5	668.8	634.1	587.1	521.2	552.8	755	721.6	610.3
Q9UK59	DBR1	Lariat debranching enzyme	Homo sapiens	High	13	1109.8	1043.3	947.7	1059	936.5	1014.4	834.8	838.3	1141.6	1126.6	927.4
P11182	DBT	Lipoamide acyltransferase component of branched-chain alpha-keto acid dehydrogenase complex, mitochondrial	Homo sapiens	High	7	252.2	263.6	265.4	284.5	263.3	324.3	308.2	325	266.2	263.4	348.6
Q8TEB1	DCAF11	DDB1- and CUL4-associated factor 11	Homo sapiens	High	4	69.4	63.5	65.4	69.9	63.9	63.6	58.7	56.9	69.5	67.3	70.5
Q5T6F0	DCAF12	DDB1- and CUL4-associated factor 12	Homo sapiens	High	1	22.1	14.5	13.5	18.6	9.7	16.1	8	6.2	21.8	19.8	7.5
Q9NV06	DCAF13	DDB1- and CUL4-associated factor 13	Homo sapiens	High	11	829.9	678.2	690.3	668.1	602.9	600.9	492.6	463.4	800.4	784.9	580.7
Q66K64	DCAF15	DDB1- and CUL4-associated factor 15	Homo sapiens	High	4	215.5	146.3	143.8	187.2	145.2	231.7	158.2	163.1	215.9	192.4	194.8
Q9NXF7	DCAF16	DDB1- and CUL4-associated factor 16	Homo sapiens	High	2	430	299.6	204.3	294.2	211.4	196.2	146	127	343.3	308.6	164.4
Q96JK2	DCAF5	DDB1- and CUL4-associated factor 5	Homo sapiens	High	3	195.4	121.1	136.9	171	130.6	134.3	76.4	68.2	167.7	199.1	118.4
Q58WW2	DCAF6	DDB1- and CUL4-associated factor 6	Homo sapiens	High	2	54.7	26.3	30.3	37.7	33.6	16.6	17.1	21.2	90.1	56.7	45.5
P61962	DCAF7	DDB1- and CUL4-associated factor 7	Homo sapiens	High	7	383.2	353.8	373.7	378.1	395.3	289.7	246.9	258	398.9	403.3	298.2
Q5TAQ9	DCAF8	DDB1- and CUL4-associated factor 8	Homo sapiens	High	9	383.7	339.1	355.3	390.2	344.9	379.2	278.2	273.6	449.9	464.1	378.8
Q8WVC6	DCAKD	Dephospho-CoA kinase domain-containing protein	Homo sapiens	High	5	177	113.5	132.7	159.1	105.1	141.9	101.1	105.1	170.2	132.1	126.2
P81605	DCD	Dermcidin	Homo sapiens	High	6	127.1	1668.3	204	253.3	196	653.3	516.3	622.6	142	112.3	2779.7
P27707	DCK	Deoxycytidine kinase	Homo sapiens	High	9	416.7	359.1	437.5	440.9	462.6	452.9	435.9	484.7	393.5	351.7	419.3
Q9NPI6	DCP1A	mRNA-decapping enzyme 1A	Homo sapiens	High	9	903.1	601.8	660.4	743.5	621.2	518.6	439.7	490.9	853.6	818.6	497.7
Q8IZD4	DCP1B	mRNA-decapping enzyme 1B	Homo sapiens	High	3	143.6	123.3	109.4	129.4	96.4	149	108.7	104.6	135.5	154.1	140.9
Q8IU60	DCP2	m7GpppN-mRNA hydrolase	Homo sapiens	High	5	259.8	227.9	223	249.4	210.9	256.4	191	214.6	252.1	257.2	229
Q96C86	DCPS	m7GpppX diphosphatase	Homo sapiens	High	10	960.9	714.7	809.9	855.1	791	792.6	740.5	827.5	965.1	938.7	734.5
P32321	DCTD	Deoxycytidylate deaminase	Homo sapiens	High	3	355.3	282.3	315.5	363.1	282	303.2	268.4	297.7	337.2	327.5	266.1
Q14203	DCTN1	Dynactin subunit 1	Homo sapiens	High	31	1834.6	1939.2	1805.8	1930.7	1596.5	1739.5	1536.6	1536.5	2124.1	2028.5	1711.4
Q13561	DCTN2	Dynactin subunit 2	Homo sapiens	High	21	1849.5	2113.6	2165.4	2283.7	2192	2152.8	2094.7	2056.9	2406	2423.3	2086.9
O75935	DCTN3	Dynactin subunit 3	Homo sapiens	High	7	313.7	407.7	371.6	405.6	359.7	453.9	386.7	440.6	426.8	419.8	401.3
Q9UJW0	DCTN4	Dynactin subunit 4	Homo sapiens	High	11	538.5	601.1	585.4	578.2	568.4	610.1	509.3	528.9	569.2	572.9	552.2
Q9BTE1	DCTN5	Dynactin subunit 5	Homo sapiens	Medium	1	136.1	115.4	135.6	122	135.1	125.7	118.7	133.5	133.9	124.6	132.8
O00399	DCTN6	Dynactin subunit 6	Homo sapiens	High	2	181.4	202.2	214.7	180.3	204	235.1	258.9	268.9	177.2	167.7	221.6
Q9H773	DCTPP1	dCTP pyrophosphatase 1	Homo sapiens	High	7	379.9	416.9	341.5	318	307.3	413.4	278.9	277.2	478.4	375.5	326.3
Q96GG9	DCUN1D1	DCN1-like protein 1	Homo sapiens	High	10	560	729.3	721.5	631.3	781.1	761.6	1019.7	1082.5	567.9	613.4	824.2
Q9BTE7	DCUN1D5	DCN1-like protein 5	Homo sapiens	High	6	1088.4	794.3	783.5	849.2	770.3	654.2	533.1	552.6	856	806.8	649.6
Q7Z4W1	DCXR	L-xylulose reductase	Homo sapiens	High	5	422.6	371.6	395.1	440.7	397.7	398.6	465.8	437.6	450.1	447	431.8
Q9BW61	DDA1	DET1- and DDB1-associated protein 1	Homo sapiens	High	3	220.1	264.9	257.9	248.2	240.6	274.2	291.9	296.1	250.6	231.2	251.9
O95865	DDAH2	N(G),N(G)-dimethylarginine dimethylaminohydrolase 2	Homo sapiens	High	4	234	159.9	202.8	257.9	183.7	155.6	107	91.5	323.7	329.7	139.8
Q16531	DDB1	DNA damage-binding protein 1	Homo sapiens	High	48	6294.1	5972.7	6392.9	6563.5	6171	6611.7	6281	6589.6	6125.2	5783.6	6438.1
Q92466	DDB2	DNA damage-binding protein 2	Homo sapiens	High	7	273	180.9	226.3	278.4	214.6	221.5	194.6	194.9	308.1	305.4	232.5
Q8NEL9	DDHD1	Phospholipase DDHD1	Homo sapiens	High	4	297.3	170.6	193.1	270.9	196.9	199.9	109.2	142.5	284.8	262.3	1493.8
O94830	DDHD2	Phospholipase DDHD2	Homo sapiens	High	7	301.2	204	187.8	241.7	201.5	248.1	214.4	212.1	280	278.3	313.2
Q5TDH0	DDI2	Protein DDI1 homolog 2	Homo sapiens	High	10	424.2	571.7	461.2	465	499.5	515.5	483.9	510.9	402.1	429.9	522.9
P39656	DDOST	Dolichyl-diphosphooligosaccharide--protein glycosyltransferase 48 kDa subunit	Homo sapiens	High	15	1057.5	915.1	1180.7	1356.9	1063.6	1066.4	1154.1	1023.2	1326.1	1299.1	1132.5
Q96HY6	DDRGK1	DDRGK domain-containing protein 1	Homo sapiens	High	8	559.6	499.5	477.7	599.1	402.4	565.1	406.8	429.4	573.4	619.1	544.3
P30046	DDT	D-dopachrome decarboxylase	Homo sapiens	High	5	477	531.1	665.1	396.3	660.2	476.9	503.1	487.2	460	480.2	398
Q92499	DDX1	ATP-dependent RNA helicase DDX1	Homo sapiens	High	35	2688.5	3556.5	3081.2	2869.2	3058.7	3347.9	3462.6	3481.8	2867.5	3269.9	3389.5
Q13206	DDX10	Probable ATP-dependent RNA helicase DDX10	Homo sapiens	High	18	881.6	836.6	700.4	751	645.9	865.8	780.7	818.9	858.1	842.2	910.7
Q96FC9	DDX11	ATP-dependent DNA helicase DDX11	Homo sapiens	High	1	30.5	31.2	39.2	36.4	41	56	50.2	57.2	28.8	26.4	50.6
Q92841	DDX17	Probable ATP-dependent RNA helicase DDX17	Homo sapiens	High	27	5460.8	4688	5019	5591.3	5012.7	4510	4155.2	4356	5386.6	5440.9	4366
Q9NVP1	DDX18	ATP-dependent RNA helicase DDX18	Homo sapiens	High	33	3728.2	3625.6	4094.4	3323.8	3874	3663.5	4296.5	4046.7	3562.3	3443	3857.4
Q9NUU7	DDX19A	ATP-dependent RNA helicase DDX19A	Homo sapiens	High	19	2368.2	2101	2101.6	2090.9	2151.7	2205.9	1989.4	2012.4	2136.5	2205.6	2163.9
Q9UHI6	DDX20	Probable ATP-dependent RNA helicase DDX20	Homo sapiens	High	18	861.3	781.5	799.6	762.5	748.4	660.3	640.8	639.4	844.5	784.5	589.7
Q9NR30	DDX21	Nucleolar RNA helicase 2	Homo sapiens	High	47	5533.4	5603	5777.9	5006.1	5874.9	4071.7	5700.1	5329.3	4966.4	4894.5	4256.4
Q9BUQ8	DDX23	Probable ATP-dependent RNA helicase DDX23	Homo sapiens	High	25	2349.3	2037.7	2174.2	2303.8	2274.3	2245.1	2037.9	2140.1	2286.5	2279.8	2133.8
Q9GZR7	DDX24	ATP-dependent RNA helicase DDX24	Homo sapiens	High	18	1126.9	1311.7	1141.4	919.2	1110.9	1193.7	1405.6	1301.6	1068.4	1018	1287.6
Q96GQ7	DDX27	Probable ATP-dependent RNA helicase DDX27	Homo sapiens	High	27	1937.1	2050.2	2154.3	2517.6	1884.6	2238.6	2494.8	2369.3	2124.6	2087.4	2360.2
Q9NUL7	DDX28	Probable ATP-dependent RNA helicase DDX28	Homo sapiens	High	8	348.9	322.7	254	385.3	233.5	241.7	241.3	221.4	337.1	335	270.6
Q9H8H2	DDX31	Probable ATP-dependent RNA helicase DDX31	Homo sapiens	High	13	1018.8	849.1	730.4	830.7	686.2	802.5	724.4	729.2	952.5	882.7	811.1
O00148	DDX39A	ATP-dependent RNA helicase DDX39A	Homo sapiens	High	7	1019.2	992.2	751.8	871.2	823.7	1197.9	603.2	676.9	763.4	854	947.9
Q13838	DDX39B	Spliceosome RNA helicase DDX39B	Homo sapiens	High	7	3287.2	2323.3	2492	2751.6	2476.7	2504.7	2471.6	2688	2923.7	2947.9	2339.9
O00571	DDX3X	ATP-dependent RNA helicase DDX3X	Homo sapiens	High	12	5240.6	4673.1	4079.7	4225.6	3939.1	3900.7	3600.4	3697	4209.9	4207.4	3634.9
Q9UJV9	DDX41	Probable ATP-dependent RNA helicase DDX41	Homo sapiens	High	11	656.1	575.1	688.9	731.5	556.4	1119.1	597.9	712.9	748.5	693.4	901.5
Q86XP3	DDX42	ATP-dependent RNA helicase DDX42	Homo sapiens	High	34	2393.6	2407.5	2594.9	2507	2632.4	2353.7	2654.9	2848.4	2602.7	2637.7	2314.9
Q7L014	DDX46	Probable ATP-dependent RNA helicase DDX46	Homo sapiens	High	35	3394.2	3208.7	2781.1	3137.9	2585.2	3375.6	3348	3316.8	3409.5	3292.4	3271.5
A0A0C4DG89	DDX46	Probable ATP-dependent RNA helicase DDX46	Homo sapiens	High	4	255.9	288.9	215.8	236.9	221.7	309.5	236.3	245.6	244	253.9	296.8
Q9H0S4	DDX47	Probable ATP-dependent RNA helicase DDX47	Homo sapiens	High	18	2125.7	2146.5	2233.8	2049.8	2082.3	2034.6	2252.4	2174.5	1990.9	1930.8	2108.2
Q9Y6V7	DDX49	Probable ATP-dependent RNA helicase DDX49	Homo sapiens	High	11	894.9	655.2	710.9	669.8	642	577.9	750.7	760.9	807.7	712.4	702.2
P17844	DDX5	Probable ATP-dependent RNA helicase DDX5	Homo sapiens	High	37	6196.3	5937.8	5119.5	5736.3	5788.1	5546.3	5663.2	5830.5	5662.4	5656.3	5284.8
Q9BQ39	DDX50	ATP-dependent RNA helicase DDX50	Homo sapiens	High	21	1849.8	1465	1497.6	1825.2	1441.9	1391.4	1137.4	1107.4	1860.5	1975.7	1451.6
Q8N8A6	DDX51	ATP-dependent RNA helicase DDX51	Homo sapiens	High	13	718.7	612	523.4	591.7	450.5	525	367.9	366.2	747.5	713.9	577.9
Q9Y2R4	DDX52	Probable ATP-dependent RNA helicase DDX52	Homo sapiens	High	16	900.8	775.3	789	756.8	707.2	843.8	795	826.8	814.2	881.8	895.8
Q8TDD1	DDX54	ATP-dependent RNA helicase DDX54	Homo sapiens	High	23	1862	1305	1208.3	1454.2	1150.9	1035	982.4	928.6	1698.7	1561.8	1105.5
Q8NHQ9	DDX55	ATP-dependent RNA helicase DDX55	Homo sapiens	High	9	404.4	290.6	301.6	347.2	292.1	284.4	222.6	230.8	362.1	332	281.9
Q9NY93	DDX56	Probable ATP-dependent RNA helicase DDX56	Homo sapiens	High	14	1284.4	1163.6	1128.6	1141.1	1018.8	913.4	1057.1	1063.1	1226.7	1148.9	939.5
O95786	DDX58	Probable ATP-dependent RNA helicase DDX58	Homo sapiens	High	13	655.6	505.8	593.5	613.2	546.4	499.5	450.7	482.2	642.2	624.3	496.9
Q5T1V6	DDX59	Probable ATP-dependent RNA helicase DDX59	Homo sapiens	High	3	81.7	50.3	48.9	60.9	46.4	53.7	26.5	29.2	82.2	66.4	37.9
P26196	DDX6	Probable ATP-dependent RNA helicase DDX6	Homo sapiens	High	18	1881.7	2144.9	1864.2	1745.9	1818.4	2029.3	1922.7	1988.2	1689.2	1729.9	2014
Q8IY21	DDX60	Probable ATP-dependent RNA helicase DDX60	Homo sapiens	High	9	290.1	277.8	272.3	273.4	258.8	325.6	283.6	316.5	290.8	319.6	315.5
Q16698	DECR1	2,4-dienoyl-CoA reductase, mitochondrial	Homo sapiens	High	14	1168.8	1326.1	1487.9	1410.2	1546.3	1438.6	1665.7	1491.8	1393.6	1316	1471.8
Q9NUI1	DECR2	Peroxisomal 2,4-dienoyl-CoA reductase	Homo sapiens	High	1	27.1	20.1	24.3	26.2	21.3	30	17.3	17.4	21.6	24.7	29.7
Q9H4E7	DEF6	Differentially expressed in FDCP 6 homolog	Homo sapiens	High	17	1009.9	1270.5	932.7	992.8	1025.7	1312.5	1105.3	1151.9	940.6	1182.3	1343.5
O15121	DEGS1	Sphingolipid delta(4)-desaturase DES1	Homo sapiens	High	3	270.8	179.4	264	296.3	254.1	172.6	135.9	138.3	280.2	332.9	182.1
P35659	DEK	Protein DEK	Homo sapiens	High	19	1886.8	1859.1	2581.1	1655.7	2716.4	2125	3096.6	3218.9	2067.7	1967	2336.2
Q8IV53	DENND1C	DENN domain-containing protein 1C	Homo sapiens	High	6	231	329.2	349.3	229.4	348.8	470.2	796.6	810	236.9	196.1	518
Q5VZ89	DENND4C	DENN domain-containing protein 4C	Homo sapiens	High	3	194.8	110.7	138.1	137.7	112.8	116.4	79.5	76.6	208.2	198.9	115.6
H7C5D0	DENND6A	Protein DENND6A (Fragment)	Homo sapiens	High	1	317.6	158.8	139.7	258.6	114.8	123.8	25.7	30.4	296.8	324.6	119.9
Q8IWF6	DENND6A	Protein DENND6A	Homo sapiens	High	2	32.7	87.8	63.7	28.5	52.2	87.5	54.4	52.9	33.1	21.3	151.3
O43583	DENR	Density-regulated protein	Homo sapiens	High	6	313.5	471.2	315.6	365	294.1	451.6	326.9	333.8	407.7	403.5	438.7
Q8WUY9	DEPDC1B	DEP domain-containing protein 1B	Homo sapiens	High	2	41.4	74.3	91.2	96.5	109.9	140.6	118.7	137.6	60.5	69.8	142.5
Q9Y315	DERA	Deoxyribose-phosphate aldolase	Homo sapiens	High	11	394.2	417.3	393.1	408.5	385.5	560.1	425.3	466.3	468.8	452.3	551.9
Q9BUN8	DERL1	Derlin-1	Homo sapiens	High	4	263.2	279	320.9	289	230	371.2	339	364.9	314	262.3	361.8
Q9GZP9	DERL2	Derlin-2	Homo sapiens	High	1	22.4	16.1	17.3	22.9	16.1	19.2	12.6	14.3	21.4	30.2	12.9
P17661	DES	Desmin	Homo sapiens	High	1	9.3	21.9	13.1	11.9	27.1	28.1	20.8	26.6	7	15.1	35.1
Q6ICB0	DESI1	Desumoylating isopeptidase 1	Homo sapiens	High	1	62.4	80.5	82.1	91	89.1	68.9	64.9	64.2	71.8	66.7	50.4
O00273	DFFA	DNA fragmentation factor subunit alpha	Homo sapiens	High	15	928.8	929.1	939.6	903.8	995	768.1	668.4	731.9	959.7	1025.3	798.4
O76075	DFFB	DNA fragmentation factor subunit beta	Homo sapiens	High	1	98.2	62.4	51.9	78.6	42.7	47.6	21.2	33	82.5	91.1	45.8
Q96DF8	DGCR14	Protein DGCR14	Homo sapiens	High	5	30.3	71.5	56	54.3	60	72.8	83.4	68.4	32.5	36.6	61.9
Q9BY27	DGCR6L	Protein DGCR6L	Homo sapiens	High	1	14.9	15.5	12.7	14	11.4	22.7	7.8	15.4	17.4	19.3	18
Q8WYQ5	DGCR8	Microprocessor complex subunit DGCR8	Homo sapiens	High	3	127.5	102	117.8	133.4	92.3	85.1	60.6	61.4	145.3	135.8	83.8
P23743	DGKA	Diacylglycerol kinase alpha	Homo sapiens	High	8	333.1	361.8	338.2	335.5	287.6	388.2	295.1	330.3	369.4	363.7	366.7
P52429	DGKE	Diacylglycerol kinase epsilon	Homo sapiens	High	5	205.6	190.7	188.2	204.7	179.1	206.9	190.8	173.7	200	202.3	223.9
Q86XP1	DGKH	Diacylglycerol kinase eta	Homo sapiens	High	4	133.2	95.7	110.9	153.8	105.6	189.8	93.7	96.4	157.6	109.3	157
Q13574	DGKZ	Diacylglycerol kinase zeta	Homo sapiens	High	3	54.9	57.7	55	69.5	42.2	66.4	44.9	45.1	87.3	96.3	77.9
Q16854	DGUOK	Deoxyguanosine kinase, mitochondrial	Homo sapiens	High	2	190.7	120.2	220.8	223.4	255.4	162.8	227.6	217.7	200.5	186.4	184.9
Q15392	DHCR24	Delta(24)-sterol reductase	Homo sapiens	High	7	324.3	251.6	366.2	351.5	343.3	325.9	289.2	300.1	323.6	360.8	284.8
Q9UBM7	DHCR7	7-dehydrocholesterol reductase	Homo sapiens	High	6	475.7	445.6	626.4	581.7	498.4	594.1	608.6	579.8	590.4	538.2	571.4
P00374	DHFR	Dihydrofolate reductase	Homo sapiens	High	6	219.2	429.7	285.8	461.9	310	540.2	344.4	303.3	223.1	188.2	425.7
Q02127	DHODH	Dihydroorotate dehydrogenase (quinone), mitochondrial	Homo sapiens	High	10	591.4	451.3	546.7	595.9	469.1	472.2	508.8	464.9	598.2	534.9	496.3
P49366	DHPS	Deoxyhypusine synthase	Homo sapiens	High	14	454.5	538.9	463.3	489	461.6	550.2	473.2	530.6	455.2	482.1	566.1
Q96LJ7	DHRS1	Dehydrogenase/reductase SDR family member 1	Homo sapiens	High	1	25.3	22.3	29.9	42.9	20.2	26.5	19.4	11.6	28.4	19	23.5
Q6UX07	DHRS13	Dehydrogenase/reductase SDR family member 13	Homo sapiens	High	3	90.6	91.2	78.8	94.1	73.7	85.6	79.8	74.8	91.3	114.3	132.3
Q13268	DHRS2	Dehydrogenase/reductase SDR family member 2, mitochondrial	Homo sapiens	High	22	3610.7	3149.6	4179	4175.4	4096.9	3909.9	4181.4	3866.9	4192.1	3726.4	3833.3
Q9BTZ2	DHRS4	Dehydrogenase/reductase SDR family member 4	Homo sapiens	High	5	407.4	387.3	378.7	449.4	347.5	332.8	375.6	340.3	445	499.4	399.5
Q9Y394	DHRS7	Dehydrogenase/reductase SDR family member 7	Homo sapiens	High	7	374.2	258.2	461.1	493.2	406.2	362.5	411.6	382.4	524.6	341.7	371.4
Q6IAN0	DHRS7B	Dehydrogenase/reductase SDR family member 7B	Homo sapiens	High	3	23.3	30	27.2	32	34.1	25.1	40.5	45.4	28.1	21.9	30.7
Q96HY7	DHTKD1	Probable 2-oxoglutarate dehydrogenase E1 component DHKTD1, mitochondrial	Homo sapiens	High	3	158.9	142.1	151.2	145.9	149.9	154.2	188.3	160.1	190.6	158.1	166.6
O43143	DHX15	Pre-mRNA-splicing factor ATP-dependent RNA helicase DHX15	Homo sapiens	High	39	6260.8	6374.4	5934.6	6174.8	5655.4	6252.2	5613.1	5780.8	6110.3	6506.8	6438.4
O60231	DHX16	Putative pre-mRNA-splicing factor ATP-dependent RNA helicase DHX16	Homo sapiens	High	30	2326	1852.5	2063	2319.1	1964.4	1861.3	1494.6	1601.2	2309.4	2304.1	1812.7
Q7Z478	DHX29	ATP-dependent RNA helicase DHX29	Homo sapiens	High	18	1049	1262.6	900.5	1010.3	965.8	1184.1	912.9	938.6	1044.2	1055.3	1191.7
Q7L2E3	DHX30	Putative ATP-dependent RNA helicase DHX30	Homo sapiens	High	50	3827.9	3105.9	2989.2	3472.3	2777.5	2702.1	2553.7	2507.3	3621.6	3550.1	2696.7
Q9H6R0	DHX33	Putative ATP-dependent RNA helicase DHX33	Homo sapiens	High	10	607.8	572.4	543.5	457.5	453.6	476.8	456.2	467.7	599.8	540	476
Q14147	DHX34	Probable ATP-dependent RNA helicase DHX34	Homo sapiens	High	2	69.6	30.8	36.5	60.2	33.6	35.6	28.9	27.6	60.5	52.7	28.8
Q9H5Z1	DHX35	Probable ATP-dependent RNA helicase DHX35	Homo sapiens	High	3	153.2	99.6	102.8	106.1	87.7	106.6	81.5	77.8	128	132.6	98
Q9H2U1	DHX36	ATP-dependent RNA helicase DHX36	Homo sapiens	High	20	1863.7	1623.3	1386.7	1635.7	1265.7	1400.1	1150.1	1115.9	1790.3	1705	1318.3
Q8IY37	DHX37	Probable ATP-dependent RNA helicase DHX37	Homo sapiens	High	17	1223	870.8	753.8	930.6	744.9	774.2	562.5	615.8	1063	1068.6	766.6
Q92620	DHX38	Pre-mRNA-splicing factor ATP-dependent RNA helicase PRP16	Homo sapiens	High	9	515.5	441.6	458.8	485.4	419.5	454.2	326.3	348.4	526.4	536.6	414.2
Q8IX18	DHX40	Probable ATP-dependent RNA helicase DHX40	Homo sapiens	High	5	275.2	289.2	198.8	228.7	205.3	325.4	202.4	200.6	235.8	241.9	325.8
Q6P158	DHX57	Putative ATP-dependent RNA helicase DHX57	Homo sapiens	High	13	586.2	406.7	374.3	486.8	332.3	411.5	257.6	275.9	542.2	494.3	359.8
Q96C10	DHX58	Probable ATP-dependent RNA helicase DHX58	Homo sapiens	High	2	64.5	45.6	48.5	60.7	55.8	62.9	59.1	59.9	75.1	73.4	66.1
Q14562	DHX8	ATP-dependent RNA helicase DHX8	Homo sapiens	High	20	1042.4	870.9	829.7	962.6	753.7	892.7	720.4	760	983.7	880	833.3
Q08211	DHX9	ATP-dependent RNA helicase A	Homo sapiens	High	61	7706.7	7402.1	6864.3	7300.5	6529.7	7164.5	7262.4	7260.7	7092.7	7199.8	7252.3
Q9NR28	DIABLO	Diablo homolog, mitochondrial	Homo sapiens	High	8	403.8	472.4	515.3	545.7	465.9	704.6	457.5	504.2	599.2	614.2	464.1
O60610	DIAPH1	Protein diaphanous homolog 1	Homo sapiens	High	42	2545.1	2859.1	2462.8	2558.6	2372.3	2923.6	2600.5	2764.4	2481.6	2506.5	2888.3
O60879	DIAPH2	Protein diaphanous homolog 2	Homo sapiens	High	22	1054.4	1094	896.7	1048.1	798.9	1233.5	844.4	853.4	1128.8	1118.1	1197.5
Q9NSV4	DIAPH3	Protein diaphanous homolog 3	Homo sapiens	High	4	65.1	57	33.8	54	40.7	82.7	107.9	88.5	55.2	57.8	120.8
Q9UPY3	DICER1	Endoribonuclease Dicer	Homo sapiens	High	23	1364.1	1353.4	1211.8	1219.3	1124.8	1226	1007.5	1047.5	1461.3	1419.5	1195.1
Q9BTC0	DIDO1	Death-inducer obliterator 1	Homo sapiens	High	24	678.4	736.6	730.8	734.7	636.4	857.6	799.1	806.6	756.6	649.3	837.4
Q68CQ4	DIEXF	Digestive organ expansion factor homolog	Homo sapiens	High	11	979.5	672.5	667.3	757.7	612.1	714.9	629.1	658.6	861.6	756.4	712.2
Q9UNQ2	DIMT1	Probable dimethyladenosine transferase	Homo sapiens	High	11	1299.7	1074.8	1039.8	1066.4	1037	934	947.2	930.2	1062.6	1007.4	1034.5
Q9P265	DIP2B	Disco-interacting protein 2 homolog B	Homo sapiens	High	18	494.3	523.4	409.9	389.6	393.7	498	391.6	406.9	469.9	440	469
Q9Y2L1	DIS3	Exosome complex exonuclease RRP44	Homo sapiens	High	31	2807	2652.3	2604.6	2353.5	2560.9	2348.6	1917.4	2051.5	2622.2	2700.1	2192.9
Q8TF46	DIS3L	DIS3-like exonuclease 1	Homo sapiens	High	4	96.2	82.7	62.8	70.4	56.8	72	40.2	35.9	100	102.8	72
Q8IYB7	DIS3L2	DIS3-like exonuclease 2	Homo sapiens	High	10	634.6	508.7	506.8	593.1	495.5	638.8	534	563.2	665.9	673.6	633.2
O60832	DKC1	H/ACA ribonucleoprotein complex subunit 4	Homo sapiens	High	21	1438.3	1478.6	1714.7	1322.8	1644	1239.9	1656	1630	1350	1360.6	1389
P10515	DLAT	Dihydrolipoyllysine-residue acetyltransferase component of pyruvate dehydrogenase complex, mitochondrial	Homo sapiens	High	16	1028.8	1170.9	1311.1	1320.7	1301.1	1108.5	1342.4	1288.1	1173.7	1277	1242.8
P09622	DLD	Dihydrolipoyl dehydrogenase, mitochondrial	Homo sapiens	High	18	1769.6	1471.4	2138.3	1927.9	2209.8	1824.4	2778.1	2685.7	1861.5	1688.1	1679.9
Q12959	DLG1	Disks large homolog 1	Homo sapiens	High	8	411	274.1	236.6	285.6	210.2	238.8	174.5	172.2	337.9	347.9	223.1
Q9Y2H0	DLGAP4	Disks large-associated protein 4	Homo sapiens	High	3	131.1	121.5	173.5	139.8	168.8	134.3	201.8	237.4	128.5	118.8	163
Q15398	DLGAP5	Disks large-associated protein 5	Homo sapiens	High	10	500.2	490.8	468.3	609.2	441.9	563.4	366.3	377.4	557.6	570.3	544.3
P36957	DLST	Dihydrolipoyllysine-residue succinyltransferase component of 2-oxoglutarate dehydrogenase complex, mitochondrial	Homo sapiens	High	11	1024.2	840.1	1024.5	1132.8	1077.6	1026.7	1292.2	1288.1	1104.3	991.3	1159
Q9NPF5	DMAP1	DNA methyltransferase 1-associated protein 1	Homo sapiens	High	8	448.6	410.8	401	435.6	401.5	447.6	405.9	392.1	453.5	431.5	437.9
Q9Y485	DMXL1	DmX-like protein 1	Homo sapiens	High	4	128.6	97.1	71.4	102	61.2	91.4	57.2	63.7	112.7	131.4	92
P51530	DNA2	DNA replication ATP-dependent helicase/nuclease DNA2	Homo sapiens	High	11	938.6	611.1	610.4	836.3	551.8	684.7	481.2	496.9	1011.7	899.3	618.1
Q8NEP3	DNAAF1	Dynein assembly factor 1, axonemal	Homo sapiens	Medium	1	52.7	86.6	84	73.2	96.5	96.1	114.6	138.3	67.9	84.7	132.4
Q86Y56	DNAAF5	Dynein assembly factor 5, axonemal	Homo sapiens	High	25	1711.1	1538.3	1431.6	1663.7	1353.7	1385.5	1094.1	1099.6	1888.7	1811.1	1305.2
P31689	DNAJA1	DnaJ homolog subfamily A member 1	Homo sapiens	High	23	3137.6	3645.6	2960.9	2783.6	3094.3	3144.5	3935	4132.8	2696.6	2520.3	2879.5
O60884	DNAJA2	DnaJ homolog subfamily A member 2	Homo sapiens	High	14	1055.4	1482	1392.7	1203.5	1381.5	1636.2	1815.7	1905.6	1096.6	1104.8	1514.6
Q96EY1-2	DNAJA3	Isoform 2 of DnaJ homolog subfamily A member 3, mitochondrial	Homo sapiens	High	3	20.3	14.7	19.4	26.5	17.7	17.9	28.4	21.3	18.9	9.4	10.3
Q96EY1	DNAJA3	DnaJ homolog subfamily A member 3, mitochondrial	Homo sapiens	High	15	1173.1	1084.4	1152.7	1141.4	1348.2	964.1	1575	1586.1	1094.5	1023.7	1004.8
P25685	DNAJB1	DnaJ homolog subfamily B member 1	Homo sapiens	High	19	1399.3	1810.4	1922.5	1728.8	2013.7	1840	2792	3038.5	1577.2	1626.2	2032.1
Q9UBS4	DNAJB11	DnaJ homolog subfamily B member 11	Homo sapiens	High	11	609.9	752.1	784.4	783.1	700.6	776.5	838.1	811.6	787.2	694.1	772.4
Q9NXW2	DNAJB12	DnaJ homolog subfamily B member 12	Homo sapiens	High	7	348.8	377.5	416	374.9	373.5	317.4	340.9	343.8	365.7	359.1	363.2
Q8TBM8	DNAJB14	DnaJ homolog subfamily B member 14	Homo sapiens	High	4	302.6	279.8	331.1	337.9	318.6	329.2	342.8	340.3	300.1	283.2	313.2
P25686	DNAJB2	DnaJ homolog subfamily B member 2	Homo sapiens	High	1	12.3	17.6	12.4	14.7	10.2	23.2	15.5	10.4	12	12.7	21.7
Q9UDY4	DNAJB4	DnaJ homolog subfamily B member 4	Homo sapiens	High	4	64.6	75	101.3	93.2	92.1	96.4	110.5	119.3	80.2	68.3	94.7
O75190	DNAJB6	DnaJ homolog subfamily B member 6	Homo sapiens	High	11	303.7	469.1	397.4	381.2	410	422.8	422.1	434.3	340.8	314.4	411.8
Q8IXB1	DNAJC10	DnaJ homolog subfamily C member 10	Homo sapiens	High	15	840.9	634.9	674.6	818.4	663.1	717.7	647.8	660.5	836.5	854.3	760.4
Q9NVH1	DNAJC11	DnaJ homolog subfamily C member 11	Homo sapiens	High	10	657.1	448.1	496.2	611.7	483.7	488.3	423.2	415.4	606.3	651.5	474.8
O75165	DNAJC13	DnaJ homolog subfamily C member 13	Homo sapiens	High	35	1347.3	1278.8	1238.2	1427.9	1190.9	1391	1102.2	1063.4	1535.1	1426.2	1438.3
Q9Y2G8	DNAJC16	DnaJ homolog subfamily C member 16	Homo sapiens	High	9	328	206.1	242.7	282.3	227.4	224.1	181	163.2	320.9	263.4	206.1
Q9NVM6	DNAJC17	DnaJ homolog subfamily C member 17	Homo sapiens	High	6	437	408.1	358.1	440.5	387.8	465.2	306.7	324.2	437.1	457.4	491.3
Q96DA6	DNAJC19	Mitochondrial import inner membrane translocase subunit TIM14	Homo sapiens	High	2	85.7	141.2	137.5	138.1	153.3	136	180.6	165	101.9	115.1	141.2
Q99543	DNAJC2	DnaJ homolog subfamily C member 2	Homo sapiens	High	15	840	842	654	884.2	654.3	698.6	524.4	566.3	879.3	882.9	829.3
Q5F1R6	DNAJC21	DnaJ homolog subfamily C member 21	Homo sapiens	High	4	411.7	240.4	260.8	389.8	227.4	185	105	112.7	459.6	442.4	188.5
Q13217	DNAJC3	DnaJ homolog subfamily C member 3	Homo sapiens	High	15	640.4	864.1	819.1	704.4	910.5	1062.7	1227.9	1251.3	706.1	758.1	1051.9
Q99615	DNAJC7	DnaJ homolog subfamily C member 7	Homo sapiens	High	26	2432.1	2971.4	2418.3	2602.7	2599.8	2845.2	2801	2953.8	2627.8	2458.7	2754.5
O75937	DNAJC8	DnaJ homolog subfamily C member 8	Homo sapiens	High	15	1401.9	1567.4	1708.4	1526.1	1825.8	1685.5	1875.4	1970.1	1422.8	1287.7	1603
Q8WXX5	DNAJC9	DnaJ homolog subfamily C member 9	Homo sapiens	High	19	1789.8	1969.3	2082.7	1931.3	1935.1	1969.2	1872.9	1900.1	1895.9	1732.6	1974.8
O00429-8	DNM1L	Isoform 8 of Dynamin-1-like protein	Homo sapiens	Medium	3	24.4	24.3	17.9	15.6	25.1	25.5	21.9	23.1	23	25.6	31.2
O00429	DNM1L	Dynamin-1-like protein	Homo sapiens	High	23	1685.3	1583.2	1399.3	1465.8	1421.5	1456.3	1200.9	1149	1698.4	1701.6	1497.2
P50570	DNM2	Dynamin-2	Homo sapiens	High	37	4469.9	3951.8	4266.9	4469.3	4193.6	4031.8	3751.6	3953.1	4423.5	4241.1	4027.5
Q9UQ16	DNM3	Dynamin-3	Homo sapiens	High	1	25.4	60.4	38.6	37.3	40.5	68.6	57.6	56.8	34	25	81.5
P26358	DNMT1	DNA (cytosine-5)-methyltransferase 1	Homo sapiens	High	51	3919	4242.8	3632.6	3680.3	3626.2	3987	3917.3	3994.4	3644.1	3505.1	3779.7
Q9Y6K1	DNMT3A	DNA (cytosine-5)-methyltransferase 3A	Homo sapiens	High	15	1362.2	950.7	1131.7	1199.5	996.8	857.4	650.9	634.1	1391.4	1363.1	824.1
Q9UBC3	DNMT3B	DNA (cytosine-5)-methyltransferase 3B	Homo sapiens	High	3	96.8	96.3	95.3	70	82.2	82.2	59.8	64.6	106.9	111.7	78.9
Q9ULA0	DNPEP	Aspartyl aminopeptidase	Homo sapiens	High	18	1621.3	1719.5	1392	1504.7	1400.8	1486.8	1369.3	1443.7	1527.7	1645.6	1496.3
O43598	DNPH1	2'-deoxynucleoside 5'-phosphate N-hydrolase 1	Homo sapiens	High	7	1273.5	849.2	850.7	1166.3	802.1	887.7	626.8	654.5	1363.1	1181.5	816.5
Q9H147	DNTTIP1	Deoxynucleotidyltransferase terminal-interacting protein 1	Homo sapiens	High	3	41.2	37.5	35.6	28.8	33.6	49.9	34.7	30.7	37	34.5	53.7
Q5QJE6	DNTTIP2	Deoxynucleotidyltransferase terminal-interacting protein 2	Homo sapiens	High	16	1103.6	772.7	770.1	832	629.4	654.4	563.4	550.9	984.1	926.9	644.8
Q96BY6	DOCK10	Dedicator of cytokinesis protein 10	Homo sapiens	High	8	539.9	380.6	326.1	446.6	312.5	285.1	243.8	264.4	526	556	302.2
Q5JSL3	DOCK11	Dedicator of cytokinesis protein 11	Homo sapiens	High	5	223.9	157	158.5	193.6	133.5	178.6	124.1	120.6	218.9	178.8	164.3
Q92608	DOCK2	Dedicator of cytokinesis protein 2	Homo sapiens	High	58	4944.8	5437.9	5228.5	5080.3	4882.2	5511.6	5251.9	5504.5	4908.4	4912.1	5561.8
Q96N67	DOCK7	Dedicator of cytokinesis protein 7	Homo sapiens	Medium	1	28.8	22.2	22.4	25.3	15.4	27.4	29.9	22.2	28.7	32.5	34.2
Q8NF50	DOCK8	Dedicator of cytokinesis protein 8	Homo sapiens	High	22	1147.4	953.7	981.4	1183.9	906	1034.4	876.2	867.9	1263.5	1113	1050.7
Q9BU89	DOHH	Deoxyhypusine hydroxylase	Homo sapiens	High	8	363	379.9	274.2	378	256.6	269	137.3	134.1	422.9	414.2	214
O60496	DOK2	Docking protein 2	Homo sapiens	High	2	31.6	50.2	52.3	49.8	52.6	52.2	57.6	53.5	32.4	29.7	67.4
Q9UPQ8	DOLK	Dolichol kinase	Homo sapiens	Medium	1	19.5	14.3	18.1	24	16.2	17.2	12.6	10.1	29.7	20.9	21.2
Q86YN1	DOLPP1	Dolichyldiphosphatase 1	Homo sapiens	High	3	79.3	82.5	130.3	90.9	84.7	99.6	167.5	155.2	107.8	103.5	85.3
Q9H3H5	DPAGT1	UDP-N-acetylglucosamine--dolichyl-phosphate N-acetylglucosaminephosphotransferase	Homo sapiens	High	3	161	116.2	166.3	109.6	127.7	135.3	134.4	137.8	177.1	153.5	149.2
Q92785	DPF2	Zinc finger protein ubi-d4	Homo sapiens	High	7	236.4	223.2	251.3	255.5	198.8	246.7	232.8	231.1	273.8	243.5	275.1
Q9BZG8	DPH1	Diphthamide biosynthesis protein 1	Homo sapiens	High	3	236.1	160.3	138.4	176.6	163.5	131.4	137.5	146.1	201.2	156.4	154.7
Q9BQC3	DPH2	Diphthamide biosynthesis protein 2	Homo sapiens	High	5	303.6	217.9	202.9	242.8	183.5	211.1	154.1	148.8	253.5	273.4	199.7
Q9H2P9	DPH5	Diphthine methyl ester synthase	Homo sapiens	High	9	741.7	689.3	567.9	725.7	556.7	627.4	468.6	495	646.8	661.7	647.2
Q7L8W6	DPH6	Diphthine--ammonia ligase	Homo sapiens	High	3	205.9	193.3	198.5	203.9	217.2	263.6	272.6	287	184.3	187.3	228.1
Q9BTV6	DPH7	Diphthine methyltransferase	Homo sapiens	High	1	35.1	24.2	15.3	16.8	11.5	22	12.6	12.1	31.7	21.9	18.2
O60762	DPM1	Dolichol-phosphate mannosyltransferase subunit 1	Homo sapiens	High	13	1091.4	650.4	1051.3	1050.1	942.9	742	890.3	884.3	951.2	815.9	732.5
Q9NY33	DPP3	Dipeptidyl peptidase 3	Homo sapiens	High	30	2310.1	2054.3	2123.3	2354.3	1931.3	1634.1	1278.6	1193.1	2458.7	2609.7	1595.7
Q9UHL4	DPP7	Dipeptidyl peptidase 2	Homo sapiens	High	8	754.6	402.9	615.2	841.3	558.2	467.1	347.2	349.8	932.2	801.7	401.2
Q6V1X1	DPP8	Dipeptidyl peptidase 8	Homo sapiens	High	1	30.1	18.9	15.2	15.5	13	41.5	12.6	12.9	21.5	20.3	37
Q86TI2	DPP9	Dipeptidyl peptidase 9	Homo sapiens	High	12	869.9	932.3	740.3	793.5	740.1	922.3	850.7	893.5	859.7	947.1	936.2
Q9C005	DPY30	Protein dpy-30 homolog	Homo sapiens	High	1	29.7	37.1	27.6	32	29.6	50.4	35.4	29.8	37.8	38.5	56.4
Q12882	DPYD	Dihydropyrimidine dehydrogenase [NADP(+)]	Homo sapiens	High	11	379.2	316.5	477.1	502.9	473.5	486.9	429.5	465.3	533.4	525.7	530.2
A0A1C7CYX9	DPYSL2	Dihydropyrimidinase-related protein 2	Homo sapiens	High	4	54.7	42.5	49.7	57.7	55	45.3	43.9	35.4	71.1	79.6	39.7
Q16555	DPYSL2	Dihydropyrimidinase-related protein 2	Homo sapiens	High	31	2842.7	2295.2	2516.1	2684.3	2543.3	2221.9	2105.6	2278.2	3022.6	3058.2	2244
Q9BPU6	DPYSL5	Dihydropyrimidinase-related protein 5	Homo sapiens	Medium	1	138.7	82.8	172	172.4	142.4	72.8	115.6	86.9	179.7	158.5	99.4
Q01658	DR1	Protein Dr1	Homo sapiens	High	6	142.3	182.9	124.8	182.7	135.8	167.4	113.5	125.8	145.9	141.3	177.4
Q14919	DRAP1	Dr1-associated corepressor	Homo sapiens	High	3	197.3	352.2	233.5	243.4	220.2	324.4	227.7	227.8	233.6	267.4	287.1
Q9Y295	DRG1	Developmentally-regulated GTP-binding protein 1	Homo sapiens	High	19	1928	2295	2062.5	1869.7	2116.2	2275.3	2532.5	2592.8	1875.6	1959.7	2144.4
P55039	DRG2	Developmentally-regulated GTP-binding protein 2	Homo sapiens	High	13	815.6	765	809.4	783.9	843.4	783	942.3	991	737.3	743.4	782.5
Q9NRR4	DROSHA	Ribonuclease 3	Homo sapiens	High	3	167.3	132	136.9	165.6	105.6	134.9	93.8	96.3	182.7	159.2	147.7
Q08554	DSC1	Desmocollin-1	Homo sapiens	High	3	115.2	237.8	180.1	427	223.3	171	144.7	111.4	160.9	239.3	206.2
Q9BVC3	DSCC1	Sister chromatid cohesion protein DCC1	Homo sapiens	High	6	253.8	312.2	281.6	314	259.8	277	214.3	208.7	360.6	368.9	285.1
O14972	DSCR3	Down syndrome critical region protein 3	Homo sapiens	High	1	38.1	28	53.8	46.7	73.6	40.5	77.3	85.9	33.6	27.9	46.8
Q02413	DSG1	Desmoglein-1	Homo sapiens	High	10	384.6	576.5	482.8	975	606.4	1000.3	635.2	552.3	367.9	587.7	911.7
Q14126	DSG2	Desmoglein-2	Homo sapiens	High	3	117.8	129.8	91.5	96.6	92.2	161.5	88.6	99.6	108.9	104.5	138.4
Q9H410	DSN1	Kinetochore-associated protein DSN1 homolog	Homo sapiens	High	4	225.2	145.7	188.4	166	195.5	191.1	145.1	170.7	202.4	214.1	181.7
P15924	DSP	Desmoplakin	Homo sapiens	High	29	964.1	1602	1438.1	1888.1	1780.2	1238.4	1078.5	1120.6	930.3	1476.5	1707.2
P60981	DSTN	Destrin	Homo sapiens	High	8	815.3	764.6	871.8	747.8	915.9	962.5	617.2	690.4	605.6	705.6	891.7
Q8TEA8	DTD1	D-tyrosyl-tRNA(Tyr) deacylase 1	Homo sapiens	High	6	270.7	441	262	280.7	287.3	330.3	279.5	266.1	224.7	251.9	381.3
Q96FN9	DTD2	Probable D-tyrosyl-tRNA(Tyr) deacylase 2	Homo sapiens	High	2	69.1	28.3	43.6	54.3	38.2	33.7	17.7	20.5	60.3	52	25.8
Q9NZJ0	DTL	Denticleless protein homolog	Homo sapiens	High	4	73.5	86.2	59.9	65.5	61.8	77.7	58.8	61.4	59.8	67.5	86.2
Q96EV8	DTNBP1	Dysbindin	Homo sapiens	High	3	92.9	58.5	65.4	85.6	51.2	50.8	27.9	45.4	109.1	105.5	44.9
Q8N5C7	DTWD1	DTW domain-containing protein 1	Homo sapiens	High	1	47.6	76.5	47.3	45.4	43.3	76.8	50.1	60.6	33.9	31.5	64.6
Q8NBA8	DTWD2	DTW domain-containing protein 2	Homo sapiens	High	2	84.6	95.4	57.8	80.6	51.5	78.8	43.1	43.9	93.5	87.6	68.9
Q8TDB6	DTX3L	E3 ubiquitin-protein ligase DTX3L	Homo sapiens	High	13	361.2	516.4	388.2	362.1	369	499.2	476.2	520.7	322	367.5	528.1
P23919	DTYMK	Thymidylate kinase	Homo sapiens	High	13	879.3	805.9	657.8	802.9	650.4	738.1	565.6	561.9	876.8	961	710.4
Q6P1R4	DUS1L	tRNA-dihydrouridine(16/17) synthase [NAD(P)(+)]-like	Homo sapiens	High	4	176.8	187.4	148.6	126.3	181.5	235.8	140.4	146.8	140.7	178.6	220.3
Q9NX74	DUS2	tRNA-dihydrouridine(20) synthase [NAD(P)+]-like	Homo sapiens	High	3	98	97.7	69.9	87	71.5	102.5	63.6	72.5	80.5	87.9	109.2
Q96G46	DUS3L	tRNA-dihydrouridine(47) synthase [NAD(P)(+)]-like	Homo sapiens	High	10	348.5	291.2	273.5	272.8	263.7	247.5	261.7	275.1	304.5	294.7	260.6
O75319	DUSP11	RNA/RNP complex-1-interacting phosphatase	Homo sapiens	High	3	165.1	173	136.1	118.4	138.2	245	227.2	239.9	150.9	153.7	261
Q9UNI6	DUSP12	Dual specificity protein phosphatase 12	Homo sapiens	High	6	192.7	241.6	232.3	233.4	245.6	236.7	299.9	270.7	193.3	226.4	258.6
P51452	DUSP3	Dual specificity protein phosphatase 3	Homo sapiens	High	3	85.5	109.1	81.6	83.5	82.6	78.9	59.3	50.4	88.6	82.5	77.6
Q16828	DUSP6	Dual specificity protein phosphatase 6	Homo sapiens	High	1	12.1	20	15	17.6	14.7	23.2	19.3	27.4	20.1	19.3	18.9
Q16829	DUSP7	Dual specificity protein phosphatase 7	Homo sapiens	High	1	25	24.4	19.8	21.8	23.3	37.4	17.6	13.3	16.9	22.1	29.4
P33316	DUT	Deoxyuridine 5'-triphosphate nucleotidohydrolase, mitochondrial	Homo sapiens	High	11	1273.2	954.2	922.8	1135.5	1000.2	863.7	699	686.4	1154.2	1069.4	817.5
O14641	DVL2	Segment polarity protein dishevelled homolog DVL-2	Homo sapiens	High	4	231.9	278.8	237.8	258	219.7	272.3	242.1	282.5	246.4	252.9	237.2
O77932	DXO	Decapping and exoribonuclease protein	Homo sapiens	High	1	10.3	20.6	10.3	12.3	7.3	35.7	22.5	20.5	8.6	24	57.3
Q7RTS9	DYM	Dymeclin	Homo sapiens	High	4	113.2	104.4	101.4	103.1	89.5	118.7	134.2	123.6	110.3	82.7	110
Q14204	DYNC1H1	Cytoplasmic dynein 1 heavy chain 1	Homo sapiens	High	183	14483.1	15618.2	13459.1	13944.7	13353.2	15269.7	13463	13897.8	14421.1	14198.3	15356
Q13409	DYNC1I2	Cytoplasmic dynein 1 intermediate chain 2	Homo sapiens	High	11	784.6	630.9	631.7	777.8	558	587.7	474	459.7	929.5	977.1	581.6
Q9Y6G9	DYNC1LI1	Cytoplasmic dynein 1 light intermediate chain 1	Homo sapiens	High	19	1426.9	1713.6	1684	1619.8	1744.9	1814	2063.2	2220.9	1521.8	1551.7	1872.6
P63167	DYNLL1	Dynein light chain 1, cytoplasmic	Homo sapiens	High	5	178.6	197	296.8	234.4	304.6	227.3	610.7	498.6	207.8	203.6	217.5
Q9NP97	DYNLRB1	Dynein light chain roadblock-type 1	Homo sapiens	High	3	63.6	59.2	68.3	70.3	75.2	80.9	82.4	74.6	79	74.8	66.3
P63172	DYNLT1	Dynein light chain Tctex-type 1	Homo sapiens	High	2	47.7	70.6	133.1	74.3	114.3	93.5	170.1	157.7	76.4	62.4	89
Q13627	DYRK1A	Dual specificity tyrosine-phosphorylation-regulated kinase 1A	Homo sapiens	High	7	483.5	320.5	489.5	413.8	469.1	354.5	321.4	329.8	476.9	439.6	341.2
Q14209	E2F2	Transcription factor E2F2	Homo sapiens	High	1	66.6	68.7	70.2	86	56.9	77	53.7	56.3	100.8	82.6	65.1
O00716	E2F3	Transcription factor E2F3	Homo sapiens	High	1	22.4	31.5	27.1	29.2	33.5	38.6	23.1	23.4	21.8	32.9	25.9
O75461	E2F6	Transcription factor E2F6	Homo sapiens	High	2	25	31.9	23.2	16	26.5	73	69.3	75.4	24.2	18.2	73.5
Q96JC9	EAF1	ELL-associated factor 1	Homo sapiens	High	2	37.1	82.8	39.7	36.1	53.7	89.9	83.9	67.1	39	30	111.2
Q56P03	EAPP	E2F-associated phosphoprotein	Homo sapiens	High	1	42.1	28.5	47.4	47	24.1	19.7	31.2	36.3	44.6	37.3	21.7
Q5JPH6	EARS2	Probable glutamate--tRNA ligase, mitochondrial	Homo sapiens	High	8	567.8	369.6	399.6	557.6	380.3	321.1	256.5	237.4	604.2	490.8	313.2
O00559	EBAG9	Receptor-binding cancer antigen expressed on SiSo cells	Homo sapiens	High	1	123.2	47.9	55.7	65.9	51.4	48.9	38.2	41.3	79.5	57.6	47.7
Q99848	EBNA1BP2	Probable rRNA-processing protein EBP2	Homo sapiens	High	12	1392.3	1189.2	1204.7	1156.9	1180.3	1132.4	1212.1	1182	1063.7	1111.6	1212.5
Q15125	EBP	3-beta-hydroxysteroid-Delta(8),Delta(7)-isomerase	Homo sapiens	High	1	241.3	149.1	484.8	250.8	301.2	24.7	15.1	11.2	227.3	241.9	24
O95905	ECD	Protein ecdysoneless homolog	Homo sapiens	High	3	112.5	115.9	65.8	91.7	72.4	101	73.2	84.8	99.3	92.6	107.6
P42892	ECE1	Endothelin-converting enzyme 1	Homo sapiens	High	7	165.5	150.1	139.7	162.1	147.7	152.4	144.9	139.9	185.8	160	149.2
O60344	ECE2	Endothelin-converting enzyme 2	Homo sapiens	High	4	262.3	319.7	220.3	255.2	219.5	289.5	194.3	207.6	276	283.7	271
O60344-4	ECE2	Isoform D of Endothelin-converting enzyme 2	Homo sapiens	Medium	1	138.8	68.1	67.2	94.8	57.8	22.2	24.4	21.3	110.4	94.3	33.8
Q13011	ECH1	Delta(3,5)-Delta(2,4)-dienoyl-CoA isomerase, mitochondrial	Homo sapiens	High	17	1707.4	1791.5	2057.4	2213.7	1979	1891.1	2111	2049.7	2225.8	2277.8	2100
H0Y5L2	ECHDC1	Ethylmalonyl-CoA decarboxylase (Fragment)	Homo sapiens	Medium	2	27	25.8	41.8	28.9	45.3	13.7	22.1	34.1	30.3	23.3	23.3
Q9NTX5	ECHDC1	Ethylmalonyl-CoA decarboxylase	Homo sapiens	High	11	578.3	655	568.7	651	545.5	722.6	611.5	583.3	687.8	652.5	631.3
P30084	ECHS1	Enoyl-CoA hydratase, mitochondrial	Homo sapiens	High	11	1318	1253.2	1054.8	1385.2	1048.5	1213.5	1048.4	959.1	1248.6	1176.3	1258.7
P42126	ECI1	Enoyl-CoA delta isomerase 1, mitochondrial	Homo sapiens	High	4	176.8	135.3	153.9	178.2	166.7	158.7	187.3	156.6	190.4	226.4	176.4
O75521	ECI2	Enoyl-CoA delta isomerase 2, mitochondrial	Homo sapiens	High	12	1402.3	1306.2	1511.6	1567.7	1536.1	1392.6	1518	1478.7	1532.8	1415.8	1500.2
Q5VYK3	ECM29	Proteasome-associated protein ECM29 homolog	Homo sapiens	High	36	2408.9	2397.3	2011.3	2156.6	1911.2	2425.4	1993.9	2144.8	2160.6	2158	2386.9
Q9BQ95	ECSIT	Evolutionarily conserved signaling intermediate in Toll pathway, mitochondrial	Homo sapiens	High	2	104.7	69.2	65.8	89.2	57.1	59.8	32.7	36.7	96.8	101.2	61
Q9H8V3	ECT2	Protein ECT2	Homo sapiens	High	5	212.4	254.6	218.5	251.2	254.3	265	251.9	243.4	181.6	151.9	251.6
Q96F86	EDC3	Enhancer of mRNA-decapping protein 3	Homo sapiens	High	8	548.9	451.7	411.9	408.6	487.1	434.9	318.8	333.1	452.9	485.3	384.4
Q6P2E9	EDC4	Enhancer of mRNA-decapping protein 4	Homo sapiens	High	24	1987.2	1720.6	1624.9	1790.8	1535.4	1549.9	1396	1430.7	1891.4	2124	1570.4
Q92611	EDEM1	ER degradation-enhancing alpha-mannosidase-like protein 1	Homo sapiens	High	2	38.7	66	49.8	49.7	56.3	69.3	42.2	39.1	50.7	48.9	60.4
Q9BZQ6	EDEM3	ER degradation-enhancing alpha-mannosidase-like protein 3	Homo sapiens	High	4	276.9	223.6	163.6	238.6	228.8	257.3	137.2	145.7	215.7	253.9	242
O60869	EDF1	Endothelial differentiation-related factor 1	Homo sapiens	High	10	541.1	792.9	709.8	569.7	700.1	932.9	1158	1172.2	561.1	561.1	958.1
Q15075	EEA1	Early endosome antigen 1	Homo sapiens	High	32	999	1466.9	1135.2	1160.8	1141.1	1418.2	1277.8	1289.9	1127.1	1148.4	1433.3
O75530	EED	Polycomb protein EED	Homo sapiens	High	11	798.2	709.2	901.3	539.2	821	822.3	786.8	787.5	755.8	786.4	862.2
P68104	EEF1A1	Elongation factor 1-alpha 1	Homo sapiens	High	31	10628.2	13135.1	11260.6	7808.2	13401.3	13892	14946	15292.7	8497.9	9696.4	12236.1
P24534	EEF1B2	Elongation factor 1-beta	Homo sapiens	High	14	1826.1	2548.2	2837.5	2362.3	3210.9	2397.1	3238.7	3409.7	1795.1	1954.4	2255.3
P29692	EEF1D	Elongation factor 1-delta	Homo sapiens	High	19	2378.9	2850.1	2406.8	2637.6	2449.8	2641.1	2841.8	2926.2	2534.4	1969.5	2574.8
P29692-3	EEF1D	Isoform 3 of Elongation factor 1-delta	Homo sapiens	High	4	18.7	20.8	16.6	17.2	16.3		2.9		22.5	31.1
O43324	EEF1E1	Eukaryotic translation elongation factor 1 epsilon-1	Homo sapiens	High	7	438	532.6	719.4	563.2	694.6	498.9	806.3	887.3	514.9	503.4	419.5
P26641	EEF1G	Elongation factor 1-gamma	Homo sapiens	High	27	3712	4386.3	3938.9	4105	4219.6	3720.4	4654.9	4719.3	3622	3736.7	3768.1
P13639	EEF2	Elongation factor 2	Homo sapiens	High	68	14283.8	17622.8	16104.8	14585	16842.9	17205.9	19697.4	20429.6	13611.8	13851.3	17287.5
O00418	EEF2K	Eukaryotic elongation factor 2 kinase	Homo sapiens	High	9	580.5	444.2	320.4	466.6	354.9	448	326.1	297.7	507.4	469.5	398.4
P57772	EEFSEC	Selenocysteine-specific elongation factor	Homo sapiens	High	8	610.9	550.5	538.9	455.1	529	526.2	450	494.6	620.7	652.2	466
Q96C19	EFHD2	EF-hand domain-containing protein D2	Homo sapiens	High	15	1474	1552.8	1628.1	1625.4	1725.9	1739.6	2084.4	2225.9	1380.5	1294.4	1636.7
Q7Z2Z2	EFL1	Elongation factor-like GTPase 1	Homo sapiens	High	17	965.7	692	850.5	860.1	815.4	729.3	575.4	592.9	1033.4	961.4	690.8
Q15029	EFTUD2	116 kDa U5 small nuclear ribonucleoprotein component	Homo sapiens	High	47	4517.8	4862.6	4475.7	4365.5	4274.8	4161.9	3570.7	3577.1	4340.5	4580.7	4082.4
Q9UHF1	EGFL7	Epidermal growth factor-like protein 7	Homo sapiens	High	1	38.4	30.7	25.3	35.2	28.4	28.8	26.9	23.5	41.8	50.8	21.4
Q9GZT9	EGLN1	Egl nine homolog 1	Homo sapiens	High	3	61.9	47.2	54.5	55.7	63.2	64.5	52.6	61.3	65.6	73.5	69.5
Q8NDI1	EHBP1	EH domain-binding protein 1	Homo sapiens	High	1	74.8	91.3	93.5	86.6	88.3	87.6	114.3	102.9	77.3	82.2	105.2
Q8N3D4	EHBP1L1	EH domain-binding protein 1-like protein 1	Homo sapiens	High	2	107.5	130.1	95.8	100	94.9	157.9	99.2	107	95.6	111.3	158.2
Q9H4M9	EHD1	EH domain-containing protein 1	Homo sapiens	High	11	1344.4	1231.2	1094.4	1032.1	1165.9	1170.4	985.4	1063.5	1225.2	1072.3	1085.2
Q9NZN3	EHD3	EH domain-containing protein 3	Homo sapiens	High	1	51.5	31.9	27.7	45	31.8	20.3	4	5	39.9	61.6	25.8
Q9H9B1	EHMT1	Histone-lysine N-methyltransferase EHMT1	Homo sapiens	High	8	341.7	264.5	274.3	317.4	252.1	287	277.8	267.7	352.7	359	255.3
Q96KQ7	EHMT2	Histone-lysine N-methyltransferase EHMT2	Homo sapiens	High	9	468.6	406.7	343.2	414.3	320	539.7	321.7	334.5	436	379.5	548.5
O14681	EI24	Etoposide-induced protein 2.4 homolog	Homo sapiens	High	1	53.1	42.2	37.8	53.9	34.3	39	27.1	26.8	63.2	61.8	41.1
P41567	EIF1	Eukaryotic translation initiation factor 1	Homo sapiens	High	6	482.3	564.1	428.5	569.2	360.2	478.8	303.9	308.6	613.7	481.5	312.2
Q8N9N8	EIF1AD	Probable RNA-binding protein EIF1AD	Homo sapiens	High	4	203.1	328.9	271.2	249.2	285.3	287.2	312	309.5	246.5	270.6	283.7
P47813	EIF1AX	Eukaryotic translation initiation factor 1A, X-chromosomal	Homo sapiens	High	10	879	1083.5	1023.4	1085.3	980.7	1073	1233.4	1285.8	905.7	911.2	1055.1
Q9BY44	EIF2A	Eukaryotic translation initiation factor 2A	Homo sapiens	High	24	1828.5	1714	1774.2	1719.1	1918.7	1594.2	1837.5	1854.7	1669	1402.1	1528
P19525	EIF2AK2	Interferon-induced, double-stranded RNA-activated protein kinase	Homo sapiens	High	20	1273.8	1511.4	1335.1	1273.7	1363.4	1578	1767.1	1772	1234.4	1250.7	1585.6
Q9P2K8	EIF2AK4	eIF-2-alpha kinase GCN2	Homo sapiens	High	2	80.3	55.1	54.6	80.6	45.5	74.4	39.4	37.2	81.7	63.8	65.6
Q14232	EIF2B1	Translation initiation factor eIF-2B subunit alpha	Homo sapiens	High	13	1569.9	1441.3	1335.2	1505.1	1442.2	1415.3	1335.2	1443.1	1446.7	1421.5	1365.8
P49770	EIF2B2	Translation initiation factor eIF-2B subunit beta	Homo sapiens	High	9	534.6	560.1	455.5	506.1	474.8	519.5	444.1	436.5	511.4	534.4	488.1
Q9NR50	EIF2B3	Translation initiation factor eIF-2B subunit gamma	Homo sapiens	High	6	407.5	320.7	247.1	347.2	234.7	278.2	203.3	193.9	347.9	343.9	265.8
Q9UI10	EIF2B4	Translation initiation factor eIF-2B subunit delta	Homo sapiens	High	12	640.3	450.6	387.7	475.7	356.3	320.4	222.6	211.3	549.6	483.5	309.8
Q13144	EIF2B5	Translation initiation factor eIF-2B subunit epsilon	Homo sapiens	High	7	448.4	334.6	351.7	394.2	371.7	307.8	272.6	303.2	425.6	414.9	309.7
P41214	EIF2D	Eukaryotic translation initiation factor 2D	Homo sapiens	High	6	266.7	216.7	205.7	236.1	181.9	177.8	156.9	162.7	267.3	279.4	213.9
P05198	EIF2S1	Eukaryotic translation initiation factor 2 subunit 1	Homo sapiens	High	32	3218.1	3308.5	3014.3	2990.4	3027.9	3201.5	2648.6	2647.9	2936.1	2939.1	3239.5
P20042	EIF2S2	Eukaryotic translation initiation factor 2 subunit 2	Homo sapiens	High	23	1462.5	2541.1	1687.8	1579.9	1633.1	2486.9	2698.3	2675.9	1614.2	1541.9	2576.3
P41091	EIF2S3	Eukaryotic translation initiation factor 2 subunit 3	Homo sapiens	High	20	2670	2485	2727.8	2645.7	2685.1	2755.1	2585.1	2617.2	2509.6	2653.1	2525.7
Q14152	EIF3A	Eukaryotic translation initiation factor 3 subunit A	Homo sapiens	High	82	8127.1	8231.2	7706.5	7314.8	7972.1	8589.6	8656.9	9105.9	7743.4	7691.6	8287
P55884	EIF3B	Eukaryotic translation initiation factor 3 subunit B	Homo sapiens	High	30	2788.7	3005.6	2839.3	2586.2	2495.8	2438.6	2155	2213.3	2597.4	2404.1	2244.8
Q99613	EIF3C	Eukaryotic translation initiation factor 3 subunit C	Homo sapiens	High	39	5393.7	5345.3	5073.8	4587.4	5037.8	4083.6	4008	3970.3	4782.7	4758	4186.2
O15371	EIF3D	Eukaryotic translation initiation factor 3 subunit D	Homo sapiens	High	25	2112.2	2902.7	1996	2105.9	2197.7	2646.8	2416.9	2346.6	1934.7	2149.6	2468.2
P60228	EIF3E	Eukaryotic translation initiation factor 3 subunit E	Homo sapiens	High	21	3086.9	2932.1	2632.2	2895.1	2763.5	2439.9	2044.4	2079.4	2785	2772.8	2421.5
O00303	EIF3F	Eukaryotic translation initiation factor 3 subunit F	Homo sapiens	High	15	2736.5	3188.2	3091	3149	2912.2	2902.7	2490.6	2707.1	3128.7	2701.7	2742.5
O75821	EIF3G	Eukaryotic translation initiation factor 3 subunit G	Homo sapiens	High	16	1270.1	1238.3	1026.4	1225.1	888.6	915.3	955.7	856.3	1241.8	1131.4	953.5
O15372	EIF3H	Eukaryotic translation initiation factor 3 subunit H	Homo sapiens	High	17	2547.5	2081.6	2030.5	2145.8	2141.5	1871	1732	1711	1998.8	2027.7	1816
Q13347	EIF3I	Eukaryotic translation initiation factor 3 subunit I	Homo sapiens	High	16	2928.4	2510	2719.2	2224.4	2908.7	2013.4	2432.8	2465.9	2554.4	2624.6	2121.6
O75822	EIF3J	Eukaryotic translation initiation factor 3 subunit J	Homo sapiens	High	11	245.3	578.4	424.8	316.8	411	612.7	827.7	870.5	288.4	256.5	637.9
Q9UBQ5	EIF3K	Eukaryotic translation initiation factor 3 subunit K	Homo sapiens	High	11	860.8	913.8	755	764.4	705	783.5	694.7	656.6	764	771.2	790.2
Q9Y262	EIF3L	Eukaryotic translation initiation factor 3 subunit L	Homo sapiens	High	28	3580.9	3378	3242.1	3549.3	3537.2	2900.2	2596.9	2638.6	3417.6	3479.1	2766.4
Q7L2H7	EIF3M	Eukaryotic translation initiation factor 3 subunit M	Homo sapiens	High	18	1846.3	2457.7	1965.7	1945.8	2023.9	2239.9	2037.4	2113.2	1563.7	1682.8	2262.2
P60842	EIF4A1	Eukaryotic initiation factor 4A-I	Homo sapiens	High	21	12739.7	13478.9	10279.8	11764.7	11409.6	10287.5	9077.4	8663.7	11938.7	12647.3	9660.8
Q14240	EIF4A2	Eukaryotic initiation factor 4A-II	Homo sapiens	High	11	963.8	1284.4	1022.9	1005.5	1122.6	1283.1	1308.8	1329.5	1037.9	1077.4	1265.6
P38919	EIF4A3	Eukaryotic initiation factor 4A-III	Homo sapiens	High	28	5151.5	3039.4	3129.8	3306.1	3346.5	2693.4	2570.3	2676.3	3254.9	3488.7	2686.2
P23588	EIF4B	Eukaryotic translation initiation factor 4B	Homo sapiens	High	22	1686.5	2542	1905.2	1846.8	2273	2201.8	2547.9	2450.5	1666.4	1727.8	2377.5
P06730	EIF4E	Eukaryotic translation initiation factor 4E	Homo sapiens	High	8	616.4	1151.6	861.7	670.8	926	1068.2	1415.1	1405.9	633.5	728.8	1133.8
O60573	EIF4E2	Eukaryotic translation initiation factor 4E type 2	Homo sapiens	High	3	170.2	300	200.7	177.2	186.7	206.1	212.8	198.3	188.4	221.9	209.6
Q13541	EIF4EBP1	Eukaryotic translation initiation factor 4E-binding protein 1	Homo sapiens	High	4	545.9	271.2	375.3	577.6	361.8	426.8	259.3	282.2	669.8	632.3	280.5
Q13542	EIF4EBP2	Eukaryotic translation initiation factor 4E-binding protein 2	Homo sapiens	High	1	97.9	68.8	90.1	133.3	98.2	66.7	47.4	57.6	120.7	135.3	56.3
Q9NRA8	EIF4ENIF1	Eukaryotic translation initiation factor 4E transporter	Homo sapiens	High	3	75.6	88.3	70.9	74.5	82.5	115.3	103.9	119.9	75	80.7	119.9
E9PGM1	EIF4G1	Eukaryotic translation initiation factor 4 gamma 1	Homo sapiens	High	5	359.3	510.7	458	479.4	509.5	502.2	449.1	423.1	438.4	437	453.2
Q04637	EIF4G1	Eukaryotic translation initiation factor 4 gamma 1	Homo sapiens	High	41	5502.7	7208.4	5503.9	5229.6	5461.7	6754	7271.8	7638.6	4984	4979.4	6545.9
P78344	EIF4G2	Eukaryotic translation initiation factor 4 gamma 2	Homo sapiens	High	34	3693.9	3615.3	3329.6	3443.7	3557.8	3373.7	2889.4	3150.9	3055.1	2999.6	3193.2
O43432	EIF4G3	Eukaryotic translation initiation factor 4 gamma 3	Homo sapiens	High	6	258.7	237.4	233.1	271.8	211.4	235.8	207.3	210.1	252.1	223.3	234.3
Q15056	EIF4H	Eukaryotic translation initiation factor 4H	Homo sapiens	High	13	1493.9	1636.4	1260.2	1541.3	1259.2	1485.9	1308.9	1184.9	1809.4	1731.2	1560
P55010	EIF5	Eukaryotic translation initiation factor 5	Homo sapiens	High	20	2130.8	2660.6	2242.5	2082.9	2255.7	2792.9	2728.9	2890.3	1800.1	1696.8	2591.7
P63241	EIF5A	Eukaryotic translation initiation factor 5A-1	Homo sapiens	High	14	3034.4	5473.5	4141.8	3025.1	4107.8	4895.7	5087.8	4360.8	2928.2	3150.2	3951.9
O60841	EIF5B	Eukaryotic translation initiation factor 5B	Homo sapiens	High	38	2668.6	3529.1	3258.9	2719	3331.7	3838.1	4443.1	4814.8	2611.3	2431.8	3798.1
P56537	EIF6	Eukaryotic translation initiation factor 6	Homo sapiens	High	8	598.6	516.1	454.8	503.6	424.7	600.3	383	306.2	617.5	614.7	578.6
Q53HC9	EIPR1	Protein TSSC1	Homo sapiens	High	7	328.6	292.5	261.5	302.3	279.1	324.1	230.8	251.5	331.7	369.8	284.8
Q9BQ52	ELAC2	Zinc phosphodiesterase ELAC protein 2	Homo sapiens	High	26	2911.6	2296.3	2201.5	2495.1	2193.8	2222.2	2280.9	2358.9	2597.4	2422.1	2104
Q15717	ELAVL1	ELAV-like protein 1	Homo sapiens	High	17	2201	1867.7	2056.4	2031.6	2194.9	1731.8	1784.3	1746.3	2292.4	2025.3	1711.7
P32519	ELF1	ETS-related transcription factor Elf-1	Homo sapiens	High	5	208.3	256.2	333.4	266.7	362.5	291.8	432.5	467.1	298.1	274.3	266.4
P55199	ELL	RNA polymerase II elongation factor ELL	Homo sapiens	High	7	351.6	303.4	304.9	355.4	290.4	308	232.6	263.2	422.4	457.5	299
Q92556	ELMO1	Engulfment and cell motility protein 1	Homo sapiens	High	22	1997.5	2513.2	2289.1	2210.5	2264.3	2538.9	2542.3	2603	2146.3	2087	2585.5
Q96JJ3	ELMO2	Engulfment and cell motility protein 2	Homo sapiens	High	7	289	192.4	255.5	301.2	250.3	193.7	163.7	178.6	369.9	316.7	206.3
Q8IZ81	ELMOD2	ELMO domain-containing protein 2	Homo sapiens	High	3	137	81.5	141.5	152	125.8	105.3	105.7	118.9	136.2	129.4	95.9
Q6PJG2	ELMSAN1	ELM2 and SANT domain-containing protein 1	Homo sapiens	High	2	49.1	52.6	46.5	48.3	42.8	49.3	60.5	53.1	47	58.5	46
A0A1C7CYX1	ELMSAN1	ELM2 and SANT domain-containing protein 1	Homo sapiens	High	1	15.3	17.2	17.2	13.5	15	18.5	16.1	20.5	14.2	12.1	20.4
Q9GZR5	ELOVL4	Elongation of very long chain fatty acids protein 4	Homo sapiens	High	1	21.5	37.4	40.9	23.6	30.5	56	47.1	49.4	21.7	29.9	50.2
Q9NYP7	ELOVL5	Elongation of very long chain fatty acids protein 5	Homo sapiens	High	2	44.6	37.5	39.8	54.4	21.1	35.6	16.4	21.2	47.3	45	29.4
Q6IA86	ELP2	Elongator complex protein 2	Homo sapiens	High	17	812.5	834.2	694.7	697.3	649.1	743.9	738.9	749.1	784.9	891.7	727.2
Q9H9T3	ELP3	Elongator complex protein 3	Homo sapiens	High	19	1314.4	922.5	1013.8	1149.9	949.7	933.7	783.1	782.6	1287.9	1245.3	937.8
Q96EB1	ELP4	Elongator complex protein 4	Homo sapiens	High	4	516.4	302.1	452.5	283.7	506.1	238.9	242	240.7	466.5	370.4	240.9
Q8TE02	ELP5	Elongator complex protein 5	Homo sapiens	High	3	161.4	102.8	102.4	152.6	110.2	104.2	86.8	86.3	134.1	114.4	104.6
Q0PNE2	ELP6	Elongator complex protein 6	Homo sapiens	High	4	528.3	365.4	416.4	532.3	403.9	375.3	321	305	599.4	519.3	364.5
Q6PCB8	EMB	Embigin	Homo sapiens	High	2	85.3	103.5	67.3	66.9	66.4	94.1	100.8	110.4	75.4	93.2	101.3
Q8N766	EMC1	ER membrane protein complex subunit 1	Homo sapiens	High	18	974.1	984.9	922.3	986.9	843	943.4	851.6	819.9	988.2	976.7	885
Q5UCC4	EMC10	ER membrane protein complex subunit 10	Homo sapiens	High	1	28.9	25.1	21.7	29.9	20.7	25.7	11.3	13.3	29.9	45.1	18.6
Q15006	EMC2	ER membrane protein complex subunit 2	Homo sapiens	High	8	269.8	312.9	284.9	342.8	320.8	312.2	277.3	295.7	306.8	298.9	296.1
Q9P0I2	EMC3	ER membrane protein complex subunit 3	Homo sapiens	High	3	55.4	40.7	53.5	66	58.5	60	52.4	46	60.5	65.2	53.8
Q9BV81	EMC6	ER membrane protein complex subunit 6	Homo sapiens	High	2	208.6	126.7	139.9	182.8	129.1	114.6	88.4	95.3	189.9	180.5	113.2
Q9NPA0	EMC7	ER membrane protein complex subunit 7	Homo sapiens	High	6	467.9	615.8	579.2	501.5	586.1	638.9	786	768.6	520.9	491.7	661.9
O43402	EMC8	ER membrane protein complex subunit 8	Homo sapiens	High	5	368.3	369.7	352.3	359.9	321.8	333	358.5	320.8	412	389.8	348.5
P50402	EMD	Emerin	Homo sapiens	High	10	817.9	567.6	790.7	826.6	871.1	630.6	656.7	653.7	775.7	782.2	577.5
Q96AY2	EME1	Crossover junction endonuclease EME1	Homo sapiens	High	2	93.4	82.2	95.7	90.7	99	89.6	101.5	115.9	75.3	78.1	95.3
Q92979	EMG1	Ribosomal RNA small subunit methyltransferase NEP1	Homo sapiens	High	13	1151.7	1113.8	995.8	1049.8	1029.7	1431.6	1152.2	1201.6	907.2	1269.3	1311.7
O00423	EML1	Echinoderm microtubule-associated protein-like 1	Homo sapiens	Medium	1	125.8	89.4	65.8	71.3	121.6	142	133.2	145	89.3	170.1	124.6
O95834	EML2	Echinoderm microtubule-associated protein-like 2	Homo sapiens	High	7	347.3	317.8	271.5	293.9	235.7	394.9	197.6	216.1	331.4	361.8	378.9
Q32P44	EML3	Echinoderm microtubule-associated protein-like 3	Homo sapiens	High	7	210.3	176.1	167	225.8	139.2	194.2	127.2	114.7	255.7	220.2	188.7
Q9HC35	EML4	Echinoderm microtubule-associated protein-like 4	Homo sapiens	High	15	760.5	697.8	687.9	750	600.2	659.5	532.1	524.8	827.3	914	623.2
Q7Z589	EMSY	BRCA2-interacting transcriptional repressor EMSY	Homo sapiens	High	2	45.9	25.9	33.8	30.2	27	40.4	28.1	36.1	36.6	36.1	38.3
O94919	ENDOD1	Endonuclease domain-containing 1 protein	Homo sapiens	High	10	592.1	412.1	487.1	564.9	448.8	368.2	365.6	368.5	657.3	599.3	414.7
Q14249	ENDOG	Endonuclease G, mitochondrial	Homo sapiens	High	2	107	96.4	69.7	99.1	58.6	62.8	47.7	44.4	104.7	103.3	74.5
Q8NFI3	ENGASE	Cytosolic endo-beta-N-acetylglucosaminidase	Homo sapiens	High	2	15.7	126.4	13.1	11.8	12.3	65.1	27.5	28.7	14.7	13.2	66.2
P06733	ENO1	Alpha-enolase	Homo sapiens	High	36	12368.8	14810.1	13877.5	13452.3	14662.2	18105.6	16254.9	15030.2	12674	12561.6	18133.2
P09104	ENO2	Gamma-enolase	Homo sapiens	High	14	1392.6	1075.6	1483.9	1500.7	1434.2	1266.9	1210.6	1282.3	1543.3	1435	1251.9
P13929	ENO3	Beta-enolase	Homo sapiens	High	2	383.7	206.6	268.6	249.6	214.4	332.5	252.5	245.2	325.5	152	261.7
Q9UHY7	ENOPH1	Enolase-phosphatase E1	Homo sapiens	High	10	536.1	692.7	592.9	619.2	546.7	777	685.3	719.2	556.1	631.8	686.1
Q7L5Y1	ENOSF1	Mitochondrial enolase superfamily member 1	Homo sapiens	High	5	239.7	222.4	188.4	221.3	212.3	245.6	216.5	230.6	202.5	256.4	275.3
Q9Y6X5	ENPP4	Bis(5'-adenosyl)-triphosphatase ENPP4	Homo sapiens	High	4	255.6	201.2	214.1	301.2	231.2	275.9	194.5	203.6	289.9	273.6	259.4
O43768	ENSA	Alpha-endosulfine	Homo sapiens	High	4	750.3	1102.8	1128.1	956.9	1081.4	1025.7	990	1112.8	778.5	781.4	739.6
O75356	ENTPD5	Ectonucleoside triphosphate diphosphohydrolase 5	Homo sapiens	High	1	39.5	28.7	26.9	46.6	30.9	33.1	23.6	24.5	45.6	50.5	36.3
Q9NPA8	ENY2	Transcription and mRNA export factor ENY2	Homo sapiens	High	1	49.4	63.4	87.4	64.8	82.8	50.4	44.3	49.4	43.5	55	41.3
Q09472	EP300	Histone acetyltransferase p300	Homo sapiens	High	5	466.1	457.3	423.5	479.6	386.8	506.9	361	367.8	496.8	501.4	426.4
Q96L91	EP400	E1A-binding protein p400	Homo sapiens	High	16	722.5	547.1	612.1	672.6	543.9	488.8	427	440.9	754.8	606.5	492.3
P11171	EPB41	Protein 4.1	Homo sapiens	High	12	842	940.5	733.7	735.6	728.8	926	896.3	937.7	755.4	743.9	878.5
E9PHY5	EPB41L2	Band 4.1-like protein 2	Homo sapiens	High	3	88.3	118.7	108	72.9	114.5	61.1	63	54.9	86.8	92.3	77.5
O43491	EPB41L2	Band 4.1-like protein 2	Homo sapiens	High	28	2261.2	2896.7	2388.6	2121.2	2278.5	2664.4	2972.1	3173.1	2187.5	2255.1	2586.9
Q9H2F5	EPC1	Enhancer of polycomb homolog 1	Homo sapiens	High	1	43.2	28.6	34	26.5	34.4	25	29.9	27.1	27.8	28.9	30.3
Q52LR7	EPC2	Enhancer of polycomb homolog 2	Homo sapiens	High	1	28.8	19.7	19.9	17.7	18.8	29.3	21.3	23	20.3	16.9	28
Q9UM22	EPDR1	Mammalian ependymin-related protein 1	Homo sapiens	High	4	229.9	182	189.9	224.2	184.2	205.5	166.4	186.9	205.3	226.7	223.2
O15197	EPHB6	Ephrin type-B receptor 6	Homo sapiens	High	4	140.6	96.5	98.4	97	83.2	112.9	76.3	85.7	130.9	125.5	120.6
P07099	EPHX1	Epoxide hydrolase 1	Homo sapiens	High	3	56.7	52.9	57.2	67.2	56.8	69.4	38.6	49.8	72.6	77	57
Q7L775	EPM2AIP1	EPM2A-interacting protein 1	Homo sapiens	High	5	162.2	145.2	104.5	140.8	104.7	135.5	89.9	97.9	161.3	132.1	140.2
Q9Y6I3	EPN1	Epsin-1	Homo sapiens	High	5	904.7	628.2	861.8	959.2	746.4	590.7	664.5	583.7	1186.1	1055.6	739.9
P07814	EPRS	Bifunctional glutamate/proline--tRNA ligase	Homo sapiens	High	74	6340	7623.9	7476.4	6276.7	7650.7	7411	7931.2	8183.1	6342.4	7025.6	7260
P42566	EPS15	Epidermal growth factor receptor substrate 15	Homo sapiens	High	7	308.2	432.6	353	355.4	323.4	473.6	362.6	380.7	361.8	323.6	484.9
Q9UBC2	EPS15L1	Epidermal growth factor receptor substrate 15-like 1	Homo sapiens	High	14	518.7	712	597.5	675.5	566.7	740.1	621.5	724.3	683.4	634.3	728.2
Q9UBC2-2	EPS15L1	Isoform 2 of Epidermal growth factor receptor substrate 15-like 1	Homo sapiens	High	2	50.7	75.6	64.8	54.8	70.1	87.1	87.7	107.5	59.8	56.3	97.1
O75616	ERAL1	GTPase Era, mitochondrial	Homo sapiens	High	4	131.5	138.6	156	143.9	163.9	130.2	160.9	147.5	129.9	135.6	137.6
Q9NZ08	ERAP1	Endoplasmic reticulum aminopeptidase 1	Homo sapiens	High	30	2269.1	2331.5	2408	2510.4	2344.1	2636.9	2567.9	2600	2308.7	2207.4	2653.6
Q6P179	ERAP2	Endoplasmic reticulum aminopeptidase 2	Homo sapiens	High	24	1714.9	1591.4	1868.6	1971.7	1772.6	1643.9	1559.7	1509.3	1897.8	1814.5	1676.9
Q96RT1	ERBIN	Erbin	Homo sapiens	High	4	303	256.5	227.7	278.3	204.8	216.1	230.4	232.6	279.5	278.3	215.5
Q8IUD2	ERC1	ELKS/Rab6-interacting/CAST family member 1	Homo sapiens	High	5	174.6	204.7	161.3	168.5	161.7	217.8	225.2	205.3	201.5	193.8	181.7
P07992	ERCC1	DNA excision repair protein ERCC-1	Homo sapiens	High	2	66.2	60.1	58.4	53.4	55	74.2	62.6	67	67.2	54.5	63.5
P18074	ERCC2	TFIIH basal transcription factor complex helicase XPD subunit	Homo sapiens	High	13	828.8	529.7	660.8	765.5	612.7	563	388.4	389.5	959.2	931.3	540.8
P19447	ERCC3	TFIIH basal transcription factor complex helicase XPB subunit	Homo sapiens	High	6	298.8	233.5	241.3	254.7	213.7	228	188.9	190	262.8	285.7	253.6
Q92889	ERCC4	DNA repair endonuclease XPF	Homo sapiens	High	15	583.5	514.4	449.3	555.3	392.5	443.9	383.7	391.9	596.6	564.6	470.2
P28715	ERCC5	DNA repair protein complementing XP-G cells	Homo sapiens	High	3	220.2	153.4	165.5	184.3	148.7	221.5	129.5	140.5	205.3	200.2	197.7
Q2NKX8	ERCC6L	DNA excision repair protein ERCC-6-like	Homo sapiens	High	16	853.8	822.1	807.9	784.1	773.9	776.3	564.8	570.5	858.5	828.1	723
Q13216	ERCC8	DNA excision repair protein ERCC-8	Homo sapiens	High	1	46	50.2	37.4	14.3	38.2	42.1	24.7	32.5	46.2	44.7	40.3
P50548	ERF	ETS domain-containing transcription factor ERF	Homo sapiens	High	2	71.9	64	59.6	72.4	67.4	67.2	50.1	61.7	87.9	75.4	67.2
Q969X5	ERGIC1	Endoplasmic reticulum-Golgi intermediate compartment protein 1	Homo sapiens	High	8	636.5	591.3	967.5	858.4	951.7	519	829.3	729.6	742.8	700.5	650.5
Q96RQ1	ERGIC2	Endoplasmic reticulum-Golgi intermediate compartment protein 2	Homo sapiens	High	3	272.6	261.4	325.1	321.7	309.7	340.1	383.9	412.5	345.3	321.4	407.4
Q9Y282	ERGIC3	Endoplasmic reticulum-Golgi intermediate compartment protein 3	Homo sapiens	High	7	380.9	535.5	557.6	499.7	494.2	560.9	792.1	751.4	448.1	463.2	616.9
P84090	ERH	Enhancer of rudimentary homolog	Homo sapiens	High	4	697.4	652.6	1029.9	794.2	945.3	635.8	1205	1126.9	793.7	653.1	590.9
Q8IV48	ERI1	3'-5' exoribonuclease 1	Homo sapiens	High	7	270.6	465.6	366.2	302.5	407.1	551	551.5	611	273.6	329.4	511.2
O43414	ERI3	ERI1 exoribonuclease 3	Homo sapiens	High	2	89.1	126	121.6	109.3	130.7	158.2	142.7	153.8	75.9	85.8	152.4
Q86X53	ERICH1	Glutamate-rich protein 1	Homo sapiens	High	1	51.9	36.8	35	54.2	34.7	39	26	26.4	64.9	51.4	37.5
Q96DZ1	ERLEC1	Endoplasmic reticulum lectin 1	Homo sapiens	High	5	120.4	115.7	114.4	139.5	122.8	145.4	131.1	125.2	122.9	126.7	151.1
O75477	ERLIN1	Erlin-1	Homo sapiens	High	8	788.5	629.2	640.1	750.9	622.2	770.2	618.6	608.4	716.6	751.7	813.6
O94905	ERLIN2	Erlin-2	Homo sapiens	High	8	810.3	677.5	831	917.9	886.7	786.7	781.8	727.1	815.9	880	773.4
Q96HE7	ERO1A	ERO1-like protein alpha	Homo sapiens	High	25	1808.4	1553.8	2039.9	2039.7	1991.4	1729.5	2072.5	2118.2	2076.3	2001	2003.3
P30040	ERP29	Endoplasmic reticulum resident protein 29	Homo sapiens	High	14	1528.5	1932.3	2110.5	2041.6	2164.4	2005.5	2654.1	2503.3	1870.4	1773.3	2130.4
Q9BS26	ERP44	Endoplasmic reticulum resident protein 44	Homo sapiens	High	11	982	966.2	1327.7	1140.8	1299.4	1155.3	1208.2	1147.3	1056.5	1023.9	1188.6
Q56NI9	ESCO2	N-acetyltransferase ESCO2	Homo sapiens	High	4	111.7	116.6	126.9	119.4	141.4	125.7	143.2	119.9	114.9	124.5	135.1
P10768	ESD	S-formylglutathione hydrolase	Homo sapiens	High	16	1946.6	2070.2	2164	2043.6	2220.5	1522.4	1802.6	1896.5	1978.9	2236.1	1555.7
Q9H501	ESF1	ESF1 homolog	Homo sapiens	High	21	1089.2	1357.7	1137.7	1032.2	1148.7	1190.4	1362.3	1375.8	961.7	991.5	1220.7
P11474	ESRRA	Steroid hormone receptor ERR1	Homo sapiens	High	3	110.9	71.4	59.7	73.4	62.9	64.3	48.2	51.2	92.7	63.2	66.8
Q9BSJ8	ESYT1	Extended synaptotagmin-1	Homo sapiens	High	44	3571	3055.6	3796	3661.4	3465.8	3357.1	3625.3	3487	4169.1	4023.5	3341.1
A0FGR8	ESYT2	Extended synaptotagmin-2	Homo sapiens	High	19	998.9	1027.9	961.1	1140.9	846	1145.1	942	985.6	1236.5	1218.8	1310.6
P62495	ETF1	Eukaryotic peptide chain release factor subunit 1	Homo sapiens	High	19	1980.7	3022.5	2152.4	1923.1	2170.6	3083.9	2643.3	2697.6	1886.7	2006.1	2880.2
P13804	ETFA	Electron transfer flavoprotein subunit alpha, mitochondrial	Homo sapiens	High	14	1089.5	1432.4	1771	1522.2	1725.2	1394.7	2205.6	2000.3	1265.6	1459.7	1657.7
P38117	ETFB	Electron transfer flavoprotein subunit beta	Homo sapiens	High	16	1741.5	2012.4	2198.6	2119.1	2175.8	2137.6	2494.2	2282.8	2047.1	1983.2	2526.7
Q16134	ETFDH	Electron transfer flavoprotein-ubiquinone oxidoreductase, mitochondrial	Homo sapiens	High	11	492.1	379	460.4	534.2	425.8	363.8	412.8	382.5	568.8	512.4	361.1
O95571	ETHE1	Persulfide dioxygenase ETHE1, mitochondrial	Homo sapiens	High	3	161.5	131	154.2	207.3	135.4	101.1	90.3	79.5	211.9	251.5	108.5
Q9HBU6	ETNK1	Ethanolamine kinase 1	Homo sapiens	High	10	530.8	822.5	466.7	445.4	500.6	662.8	537.1	519	435.4	445.2	666.3
P14921	ETS1	Protein C-ets-1	Homo sapiens	High	4	92.2	132.6	127.7	95.1	127	143.1	205.5	194.2	75.1	59.8	140.7
P41212	ETV6	Transcription factor ETV6	Homo sapiens	High	8	561.6	537.8	622	554.1	602.7	572.3	619.3	598.9	548.1	487.3	583.9
Q96CN4	EVI5L	EVI5-like protein	Homo sapiens	High	2	22.3	25.7	25.2	29.8	21.6	39.2	25.8	26.2	37.1	35.1	36.8
Q9UI08	EVL	Ena/VASP-like protein	Homo sapiens	High	10	779.5	559.2	613.5	671.9	553.4	414.1	364.5	362.9	849.4	726.7	424.5
Q01844	EWSR1	RNA-binding protein EWS	Homo sapiens	High	7	682.8	965.7	941	788.8	1057.9	960	1057.3	1167.7	777.9	889	963.9
Q9NVH0	EXD2	Exonuclease 3'-5' domain-containing protein 2	Homo sapiens	High	1	16.7	14.8	10.8	14.7	7	17.9	12.6	11.4	15.9	21.3	16.2
Q9NV70	EXOC1	Exocyst complex component 1	Homo sapiens	High	10	469.8	351.1	431.6	348.6	414.4	338.4	416.5	395	393.2	410.7	379.2
Q96KP1	EXOC2	Exocyst complex component 2	Homo sapiens	High	18	721.6	755.8	666.8	682.1	641.1	726.8	593.2	604.7	670.9	664.9	769
O60645	EXOC3	Exocyst complex component 3	Homo sapiens	High	8	626.1	432.3	347.3	503.3	343.6	443	308.2	301.6	547.6	516.2	444.3
Q96A65	EXOC4	Exocyst complex component 4	Homo sapiens	High	15	1031.5	846.7	809.8	859.4	774.6	971	806.9	838	915.6	986.8	965.6
O00471	EXOC5	Exocyst complex component 5	Homo sapiens	High	14	971.8	768.9	709.8	757	683.6	696.4	509.7	540.1	879.9	862.3	634.4
Q8TAG9	EXOC6	Exocyst complex component 6	Homo sapiens	High	14	546.3	465.2	425.3	487.5	413.9	468	433.1	428.4	538.8	515.5	631.7
Q9UPT5	EXOC7	Exocyst complex component 7	Homo sapiens	High	12	609.2	640.9	600.9	575.4	587.9	575.6	665.3	639.8	563.3	601.8	660.8
Q9UPT5-6	EXOC7	Isoform 6 of Exocyst complex component 7	Homo sapiens	High	2	58.1	27.3	31.7	40.7	28.7	19.4	14.2	15.1	48.9	46.7	17.6
Q8IYI6	EXOC8	Exocyst complex component 8	Homo sapiens	High	12	709.2	724.2	591.7	621.8	560.6	738	568.2	631.5	623	648.8	730.5
Q9Y2C4	EXOG	Nuclease EXOG, mitochondrial	Homo sapiens	High	4	140.5	147.1	159.1	124.2	159.1	219.6	300.4	294.3	144.4	131.6	213.6
Q9Y3B2	EXOSC1	Exosome complex component CSL4	Homo sapiens	High	4	398.5	338.4	405.8	257	408.1	363.2	387.5	382.4	352.1	307.2	371.9
Q01780	EXOSC10	Exosome component 10	Homo sapiens	High	27	2854.3	2269.1	2311.4	2533.4	2144	1861.2	1657.8	1672.2	2655	2567.3	1889.4
Q13868	EXOSC2	Exosome complex component RRP4	Homo sapiens	High	11	799.6	570.5	529.3	668.8	506.7	524	365.7	363.1	663.6	757.3	495.4
Q9NQT5	EXOSC3	Exosome complex component RRP40	Homo sapiens	High	11	643.3	505.6	527.4	534.7	520.2	503.3	386.7	381.6	550.5	528.7	478.2
Q9NPD3	EXOSC4	Exosome complex component RRP41	Homo sapiens	High	5	502.9	272.8	302.3	397.5	277.1	243.9	192.2	189	435.6	414.7	228.8
Q9NQT4	EXOSC5	Exosome complex component RRP46	Homo sapiens	High	5	362.5	360	303.2	342.2	309	368.6	275.7	289.4	374.5	408.3	311.5
Q5RKV6	EXOSC6	Exosome complex component MTR3	Homo sapiens	High	10	520.3	424	448.3	539.4	399.3	352.3	288.8	279.7	522.7	531.8	350.8
Q15024	EXOSC7	Exosome complex component RRP42	Homo sapiens	High	6	753.1	561.2	699.6	810.8	553.3	403.3	372.2	338.7	847.8	793.6	383.2
Q96B26	EXOSC8	Exosome complex component RRP43	Homo sapiens	High	4	238.6	164.4	180.6	213	180.3	130.4	127.9	141	214.9	213.4	150.8
Q06265	EXOSC9	Exosome complex component RRP45	Homo sapiens	High	4	165.9	153.3	156.6	176.3	158.6	187.5	153.2	145.8	156.2	151.2	177.7
Q9UBQ6	EXTL2	Exostosin-like 2	Homo sapiens	High	1	16.2	16.4	12.9	14.7	15	18.6	16	12.6	14.3	11.3	17.6
O43909	EXTL3	Exostosin-like 3	Homo sapiens	High	4	108.6	70.4	71.9	101.6	68.4	69.6	67.9	72.1	97.4	109.5	90.7
Q99504	EYA3	Eyes absent homolog 3	Homo sapiens	High	3	159.3	168.1	118	142.4	123.2	172.7	125.5	114.7	161.7	160.1	162.3
Q15910	EZH2	Histone-lysine N-methyltransferase EZH2	Homo sapiens	High	12	600.4	537.5	505.7	539.5	416.9	579.1	450.1	470.8	573.5	541.1	514.2
P15311	EZR	Ezrin	Homo sapiens	High	38	4060.2	4607.5	4135.7	4097.1	4860.6	4695.4	5039.4	5332.2	3942.7	4361.5	4790
P00742	F10	Coagulation factor X	Homo sapiens	High	3	91	44.7	138.4	125.2	123.7	81.3	112.3	126	155.9	126.2	86.5
P00734	F2	Prothrombin	Homo sapiens	High	4	69	71.7	155.8	119.7	178.7	118.9	224.1	227.1	129.1	101.2	128.3
P12259	F5	Coagulation factor V	Homo sapiens	High	4	48.2	78.1	168.8	126.9	168.7	127.9	287.3	256.4	128.3	128.7	138.7
P23610	F8A1	Factor VIII intron 22 protein	Homo sapiens	High	1	22.2	18.5	22.3	28.5	14.4	26.1	22.4	25.8	23.4	24.9	25.7
Q0VG06	FAAP100	Fanconi anemia core complex-associated protein 100	Homo sapiens	High	2	106	70.8	70.4	102.7	62.7	70.3	47.9	47.6	127.3	116.1	71.9
Q01469	FABP5	Fatty acid-binding protein, epidermal	Homo sapiens	High	12	1546.3	2157.9	1461.4	1488.4	1722.1	1929.1	1790	1876.6	1341.2	1598.6	1942.6
P51161	FABP6	Gastrotropin	Homo sapiens	High	4	298.5	322.2	303.9	321.4	295.7	228.1	180.9	196.1	318.4	381.6	231.2
Q13158	FADD	FAS-associated death domain protein	Homo sapiens	High	5	787.9	633.1	527.8	778.2	475.7	723.7	363.7	375.8	771.2	705.3	540.5
O60427	FADS1	Fatty acid desaturase 1	Homo sapiens	High	6	541	288.6	356.8	372.8	353.9	344.3	362.5	334.2	350.5	370.7	334.3
O95864	FADS2	Fatty acid desaturase 2	Homo sapiens	High	6	602	411.6	825.6	808.8	883.5	696.1	818.1	776	808.2	909.3	628.9
Q9UNN5	FAF1	FAS-associated factor 1	Homo sapiens	High	16	1405.9	1539.9	1357.7	1486.7	1382	1762.2	1309	1412.3	1377.6	1385.3	1658.1
Q96CS3	FAF2	FAS-associated factor 2	Homo sapiens	High	9	569.8	441.8	564.7	601.7	554.1	557.3	491.6	492.9	583.6	629.2	523
P16930	FAH	Fumarylacetoacetase	Homo sapiens	High	13	986.1	819.6	939.8	856.6	978	955.2	735.9	793.3	914.7	913	921.6
Q6P587	FAHD1	Acylpyruvase FAHD1, mitochondrial	Homo sapiens	High	6	193.1	230.3	245.7	216.6	226.9	215.8	235.5	221	188.3	215.2	206.5
Q96GK7	FAHD2A	Fumarylacetoacetate hydrolase domain-containing protein 2A	Homo sapiens	High	8	504.8	508.3	577.6	528.9	539.7	654.8	876.4	910.7	567.6	636.1	645.7
Q9NVQ4	FAIM	Fas apoptotic inhibitory molecule 1	Homo sapiens	High	3	405.9	432.6	297.8	308	314.5	179.8	164.7	168.8	280.7	303.4	181.9
Q8N5W9	FAM101B	Filamin-interacting protein FAM101B	Homo sapiens	High	2	16.1	27	17.2	20.1	19.4	33.2	21.3	22.6	28	28.6	33.9
Q9BTL3	FAM103A1	RNMT-activating mini protein	Homo sapiens	High	5	119.1	180.6	152.9	111.7	138.8	217	159.1	170.2	137.7	151.2	174
Q9H098	FAM107B	Protein FAM107B	Homo sapiens	High	1	38.2	61.5	46.8	31.7	41.5	71.1	65.3	74.5	37.6	32.8	74.9
Q96PZ2	FAM111A	Protein FAM111A	Homo sapiens	High	5	155.7	121.5	160.2	156.8	143	109.1	114.4	122.1	167.2	136.3	100.5
Q9NRY5	FAM114A2	Protein FAM114A2	Homo sapiens	High	6	358.8	434.5	346.9	379.4	345.8	541.6	425.6	428.3	365.5	385.4	543.4
Q9C073	FAM117A	Protein FAM117A	Homo sapiens	High	4	120.7	96.6	125.4	132.9	98.3	121.3	95.3	88.8	191.2	143.4	117.7
Q9NWS6	FAM118A	Protein FAM118A	Homo sapiens	High	1	24.7	25.1	27	37.2	16.3	18.6	15	15	42.3	34.9	19.7
Q9BPY3	FAM118B	Protein FAM118B	Homo sapiens	High	3	107.9	107.6	76.3	108.2	87	109.5	78.4	76.7	108.1	101.8	107
Q9NZB2	FAM120A	Constitutive coactivator of PPAR-gamma-like protein 1	Homo sapiens	High	19	1162	1180.5	1005.5	1005.7	947	1098.8	916.8	858.9	1216.4	1334.5	1019.9
Q96EK7	FAM120B	Constitutive coactivator of peroxisome proliferator-activated receptor gamma	Homo sapiens	High	5	127.2	70.1	81.9	123.9	74.1	82	50.1	62.5	142.3	132.5	93.6
Q9NX05	FAM120C	Constitutive coactivator of PPAR-gamma-like protein 2	Homo sapiens	High	3	95.7	71.8	75.4	88.5	70.4	79.9	65.2	63.4	99.6	75.1	71.5
Q96E09	FAM122A	Protein FAM122A	Homo sapiens	High	2	36.4	13.2	23.3	28.3	25.7	14.6	5.2	6.9	26	21.3	16.1
Q7Z309	FAM122B	Protein FAM122B	Homo sapiens	Medium	1	14.5	11	12.3	12.9	14.7	20.3	9.5	13.8	15.8	13.2	15.3
Q9BYI3	FAM126A	Hyccin	Homo sapiens	High	2	113.6	101.8	79	105	73.7	88.7	68.1	71.2	127.7	121.3	96.9
Q9BZQ8	FAM129A	Protein Niban	Homo sapiens	High	1	37.7	26.1	30.9	34.3	24.8	28.2	20.1	19.8	46.7	40.8	28.8
Q5BKY9	FAM133B	Protein FAM133B	Homo sapiens	High	2	120.1	172.7	134.5	146	153.2	166.9	148.7	145.2	120.2	145.4	168.9
Q8NC44	FAM134A	Protein FAM134A	Homo sapiens	High	1	16.8	16.8	26.6	25.7	21.4	28.6	23.4	23.9	21.9	25.3	22.6
Q86VR2	FAM134C	Protein FAM134C	Homo sapiens	High	2	63.5	42.6	52.2	57.6	52.2	62.2	34.1	43.4	80.5	66.6	49
Q96C01	FAM136A	Protein FAM136A	Homo sapiens	High	6	260.9	306.8	288.7	259.4	264.4	333.8	282.8	250.5	293.6	317.9	248.7
Q8N612	FAM160A2	FTS and Hook-interacting protein	Homo sapiens	Medium	1	36.6	19.5	26	31.9	19.2	21.8	13.3	16.6	41.6	23.3	25
Q5W0V3	FAM160B1	Protein FAM160B1	Homo sapiens	High	14	744.4	960	757.3	770.5	754.7	967.3	699.5	744.7	751.4	722.8	1014.4
Q96A26	FAM162A	Protein FAM162A	Homo sapiens	High	7	421	862.8	964.7	626.1	1124.9	810.5	1649.7	1587.3	543.3	526.1	887.3
Q9Y6X4	FAM169A	Soluble lamin-associated protein of 75 kDa	Homo sapiens	High	4	105	89.1	70.5	90.1	74.5	107.8	72.4	63.1	108.8	98.9	84.8
Q8WUF8	FAM172A	Protein FAM172A	Homo sapiens	High	7	159.4	199.6	165.7	184.1	160.1	211.6	168.9	160.7	165	171.2	225.9
Q15018	FAM175B	BRISC complex subunit Abro1	Homo sapiens	High	4	197.3	146.6	173.2	186.8	158.4	139.3	114.2	123.5	195	169.7	122.4
Q8N128	FAM177A1	Protein FAM177A1	Homo sapiens	High	1	104.2	59.1	84.9	100.5	72.8	74.3	78.2	85.8	121	97	83.2
Q8IXR5	FAM178B	Protein FAM178B	Homo sapiens	Medium	1	43.9	52.1	32.5	48.9	31.6	54.4	18.2	15.9	57.5	62.5	56.4
Q9GZU8	FAM192A	Protein FAM192A	Homo sapiens	High	10	669.9	488.7	495.3	637.1	560	474.2	422.1	444.3	663.9	624.3	493.6
P78312	FAM193A	Protein FAM193A	Homo sapiens	High	2	24.1	14.7	17.7	24.4	14.4	18	20.2	17.5	16.8	17.4	21.4
Q9H8W3	FAM204A	Protein FAM204A	Homo sapiens	High	2	70.8	80.7	73.4	59.9	70.4	94.2	114.8	136	68.5	67.4	101.9
Q9NSI2	FAM207A	Protein FAM207A	Homo sapiens	High	9	502	360.5	300.4	451	295.8	312.6	240	250	530.8	474.4	290.7
Q9UK61	FAM208A	Protein TASOR	Homo sapiens	High	15	582.9	488.9	619.5	593	567.9	561.9	632.5	647.7	700.2	682.4	573.9
Q5VWN6	FAM208B	Protein FAM208B	Homo sapiens	High	4	133.8	126.4	116.5	114.9	102.3	138.7	98.6	102.7	128.8	104.6	145
O75063	FAM20B	Glycosaminoglycan xylosylkinase	Homo sapiens	High	1	31.3	20.8	25.7	29.9	28.2	44.4	30.8	28.8	24.7	30.8	37.6
Q641Q2	FAM21A	WASH complex subunit FAM21A	Homo sapiens	High	6	93.8	179.3	145.1	121.2	138.8	169.5	191.1	209.9	106.6	119.8	190.9
Q9Y421	FAM32A	Protein FAM32A	Homo sapiens	Medium	1	41.8	51.2	41.5	37	41.6	51.4	41	42.7	41.2	35.4	64.5
Q92520	FAM3C	Protein FAM3C	Homo sapiens	High	2	110.8	67	122.4	121	116.8	48.4	86.2	76.4	124.4	107.9	54.5
Q6NSW5	FAM45BP	Putative protein FAM45B	Homo sapiens	High	2	96.2	56.5	60.5	84.3	64.3	58.1	33.8	37.2	96.2	72	54.2
Q9NUQ9	FAM49B	Protein FAM49B	Homo sapiens	High	15	2463.4	1819.7	1910.8	2372.2	1900.7	1516.1	1224.9	1201.9	2524.7	2487.5	1509.7
Q14320	FAM50A	Protein FAM50A	Homo sapiens	High	10	1175.6	1372.1	1111.4	1201.3	1192.7	1292.7	1085.5	1165.9	1180.9	1249.7	1199.7
Q9NP50	FAM60A	Protein FAM60A	Homo sapiens	High	3	168.5	129.7	83.8	89.3	80.1	85.3	61.3	58.6	96.8	118.6	79.5
Q9BSJ6	FAM64A	Protein FAM64A	Homo sapiens	High	1	14	15.6	12	19.4	11.4	16.6	12.7	7.8	15.2	18.3	13
Q5HYJ3	FAM76B	Protein FAM76B	Homo sapiens	High	2	90.2	151.4	103.5	129	95.5	121.9	106.5	117.1	118.6	124.7	140.1
Q5JUQ0	FAM78A	Protein FAM78A	Homo sapiens	Medium	1	29.4	36.2	34	42.9	54	45.9	51.8	50.5	30.4	42.5	60.7
Q9H4H8	FAM83D	Protein FAM83D	Homo sapiens	High	7	314.4	908.6	260.6	317.8	234.4	245.4	301.6	314.8	318.7	259.6	246.8
Q96GI7	FAM89A	Protein FAM89A	Homo sapiens	Medium	1	27.9	26	30.3	32.2	23	19.6	22.4	25.5	22.1	15.2	25.9
Q658Y4	FAM91A1	Protein FAM91A1	Homo sapiens	High	15	747.7	582.4	590.8	701.3	570.6	492.9	411.9	437.2	791	742	526.7
Q9H5X1	FAM96A	MIP18 family protein FAM96A	Homo sapiens	High	1	67.2	37.2	50.9	73.9	44.1	47.6	28.7	30.2	71.8	73.1	34.3
Q9Y3D0	FAM96B	Mitotic spindle-associated MMXD complex subunit MIP18	Homo sapiens	High	5	221.3	181.6	213.1	254.6	196.4	214.2	136.3	145.7	300.1	302.1	161.3
Q8NCA5	FAM98A	Protein FAM98A	Homo sapiens	High	8	792.1	697.9	553	686.1	510.7	456.8	305.7	295.2	754.1	746.3	416.3
Q52LJ0	FAM98B	Protein FAM98B	Homo sapiens	High	13	1250.4	1403.6	1116	1147.7	1126.4	1412.5	1291.3	1295.7	1159.2	1171.4	1416.2
Q17RN3	FAM98C	Protein FAM98C	Homo sapiens	High	3	103.5	91.4	69	101.4	69.4	316.1	98.7	109.9	96.9	98.6	320.7
O15360	FANCA	Fanconi anemia group A protein	Homo sapiens	High	1	18.1	20.7	17.4	18.8	16.5	28.5	18.2	19.8	19.9	20.7	23.3
Q9BXW9	FANCD2	Fanconi anemia group D2 protein	Homo sapiens	High	10	426.8	470.5	329.3	345.5	348.4	490	372.8	372.1	364.3	376	415.9
Q9HB96	FANCE	Fanconi anemia group E protein	Homo sapiens	High	2	36.2	42.6	39	39.2	25.2	35.5	25.8	26.8	41.7	67.1	36.4
Q9NVI1	FANCI	Fanconi anemia group I protein	Homo sapiens	High	10	456.8	417.5	351	433	345.3	562	344.4	351.4	444.2	424.8	562
Q8WVX9	FAR1	Fatty acyl-CoA reductase 1	Homo sapiens	High	6	314	150.3	220.4	252.7	196.9	274.2	218.3	226.7	241.3	186.1	262.4
Q96K12	FAR2	Fatty acyl-CoA reductase 2	Homo sapiens	High	1	25.4	31.4	46	39.8	29.4	35.3	29.6	30	26.8	27.9	32.7
O95363	FARS2	Phenylalanine--tRNA ligase, mitochondrial	Homo sapiens	High	7	427.9	311.4	407.4	411.1	370.8	379.1	577.1	613.7	412.6	374.8	438.4
Q9Y285	FARSA	Phenylalanine--tRNA ligase alpha subunit	Homo sapiens	High	13	1664.2	1293.2	1304	1401.8	1371.9	1186.1	1158.1	1259.4	1571.8	1802.4	1176.4
Q9NSD9	FARSB	Phenylalanine--tRNA ligase beta subunit	Homo sapiens	High	34	3093.7	3332.6	3213.9	2982.2	3400.8	3220.2	3556.4	3599.9	3025.1	3185.2	3346.8
P25445	FAS	Tumor necrosis factor receptor superfamily member 6	Homo sapiens	Medium	1	27.9	47	37.6	81.9	58.3	59.1	65.6	32.9	18.6	39.7	43.8
P49327	FASN	Fatty acid synthase	Homo sapiens	High	103	10159.2	9154.9	8647.5	9501.2	8587	8533.5	6614.6	6719.7	10464.9	10577.3	7752.1
Q53R41	FASTKD1	FAST kinase domain-containing protein 1, mitochondrial	Homo sapiens	High	5	197.8	176	146.9	175.1	145.5	124.6	113.8	118.9	205.5	188.7	143.7
Q9NYY8	FASTKD2	FAST kinase domain-containing protein 2, mitochondrial	Homo sapiens	High	13	667.5	769.7	582.5	667.1	611.3	733.9	632.5	615.2	573.6	648.4	700
Q14CZ7	FASTKD3	FAST kinase domain-containing protein 3, mitochondrial	Homo sapiens	High	2	45.8	58.5	51.4	54.2	60.2	51.8	48.8	45.6	44	38.1	33.2
Q7L8L6	FASTKD5	FAST kinase domain-containing protein 5, mitochondrial	Homo sapiens	High	9	551.6	503.6	564.5	581.2	616.6	538.6	793.8	830.9	498.8	517.7	567.9
P62861	FAU	40S ribosomal protein S30	Homo sapiens	High	3	380.6	499.3	589.8	472.6	527.8	608.9	695.7	648.3	453.7	392.4	484.9
P22087	FBL	rRNA 2'-O-methyltransferase fibrillarin	Homo sapiens	High	21	3988.8	3618.8	3734.4	3236.3	3784.9	3384.6	4117.2	3923.5	3187.1	3182.2	3405.6
A6NHQ2	FBLL1	rRNA/tRNA 2'-O-methyltransferase fibrillarin-like protein 1	Homo sapiens	High	3	167.4	101	89	116.4	61.9	48.3	16	15.3	104.8	188	50.3
P23142	FBLN1	Fibulin-1	Homo sapiens	High	1	10	9.1	31.7	35.5	42.7	24.9	37.2	26.1	32.7	21.1	28.1
P35555	FBN1	Fibrillin-1	Homo sapiens	High	2	43.1	41.1	28.5	50	33.5	30.4	18.4	17.4	46.7	35.1	18.6
Q9HAH7	FBRS	Probable fibrosin-1	Homo sapiens	High	2	36.2	26.5	39	33.1	35	17.1	17.3	13	45.8	28.2	8.6
Q9HCM7	FBRSL1	Fibrosin-1-like protein	Homo sapiens	High	1	62.4	51.1	31.1	35.7	26.8	11.5	8.8	8.2	53.9	52.6	10.3
Q9NXK8	FBXL12	F-box/LRR-repeat protein 12	Homo sapiens	High	7	238.2	250.9	192.2	221.9	170	272.8	167.7	174	242.3	248.5	269.2
Q9H469	FBXL15	F-box/LRR-repeat protein 15	Homo sapiens	High	1	39.5	28.8	36.7	39.8	34.2	34.9	36	30.2	39.9	37.4	37.1
Q96ME1	FBXL18	F-box/LRR-repeat protein 18	Homo sapiens	High	1	59.3	43.3	43	53.3	43.3	59.9	38.1	34.1	66.9	63.9	50.8
Q96ME1-4	FBXL18	Isoform 4 of F-box/LRR-repeat protein 18	Homo sapiens	Medium	1	38.4	42.7	48.9	41.8	54.5	55.2	87.6	91.4	29	33.3	63.6
Q8N531	FBXL6	F-box/LRR-repeat protein 6	Homo sapiens	High	3	76.8	61.6	66.8	69.9	57.6	76.8	57.6	55.1	82.7	77.6	76.2
Q86XK2	FBXO11	F-box only protein 11	Homo sapiens	High	2	17.3	11.3	6.4	12.8	7.7	36.3	13.1	13.6	11.3	12.1	36.3
O94952	FBXO21	F-box only protein 21	Homo sapiens	High	2	34	13.8	9.3	16.7	6.3	26.9	9.7	13.8	22.3	15.8	21.6
Q8NEZ5	FBXO22	F-box only protein 22	Homo sapiens	High	6	475.9	294.3	315.3	434.2	297.6	316.7	248.6	263.4	528.5	510.1	287.2
Q9NVF7	FBXO28	F-box only protein 28	Homo sapiens	High	4	50.6	27.1	35.2	17.2	31.5	48	38.9	46	40.5	33.6	39.7
Q9UK99	FBXO3	F-box only protein 3	Homo sapiens	High	3	272.8	190.2	258	244.1	229.8	142.9	157.3	195	243.4	270.8	148.5
Q7Z6M2	FBXO33	F-box only protein 33	Homo sapiens	High	1	27.8	15.8	13.9	19.1	13.9	21.5	8.4	6.1	27.7	24.7	19.1
Q6PIJ6	FBXO38	F-box only protein 38	Homo sapiens	High	7	306.1	280.8	199.7	239.5	179.6	283	203	204.9	318.3	332.5	284.4
Q9Y3I1	FBXO7	F-box only protein 7	Homo sapiens	High	8	434.8	410.3	366.7	411.7	356.3	452.4	302.9	349.8	407.9	433.8	411.7
Q9UKT8	FBXW2	F-box/WD repeat-containing protein 2	Homo sapiens	High	1	68.1	53.2	59.2	66.1	66	45.3	40.1	53.6	49.7	52	35.5
Q8N3Y1	FBXW8	F-box/WD repeat-containing protein 8	Homo sapiens	High	1	21.8	7.9	17.3	15.5	12.8	21.8	7.9	8.8	16.2	13.6	16.5
Q9Y324	FCF1	rRNA-processing protein FCF1 homolog	Homo sapiens	High	4	147.3	130.7	137.9	130.5	98.9	144.3	101	101.7	180.2	148.7	119.6
O14526	FCHO1	F-BAR domain only protein 1	Homo sapiens	High	2	87.4	80.5	52.8	74.7	51.2	41.9	23.1	22	85.8	105.3	39.9
O94868	FCHSD2	F-BAR and double SH3 domains protein 2	Homo sapiens	High	5	228.5	181.9	143.2	160.9	143.5	199.8	141	142	217.4	215.3	180.8
P37268	FDFT1	Squalene synthase	Homo sapiens	High	22	2763.5	1932.8	3132.1	3645.4	2741	2766.6	2460.1	2396.7	3375.3	3667.4	2577.5
P14324	FDPS	Farnesyl pyrophosphate synthase	Homo sapiens	High	11	1162.8	1123.8	1196.9	1452.6	1286.9	1389.9	1163.6	1210	1558.3	1412	1277.4
P10109	FDX1	Adrenodoxin, mitochondrial	Homo sapiens	High	3	363.3	214.7	258.3	368.3	244.9	247.9	204.8	213	387.2	306.7	241.5
P22570	FDXR	NADPH:adrenodoxin oxidoreductase, mitochondrial	Homo sapiens	High	10	503.2	469.8	519	576.6	535.3	551.4	490	478.4	622.8	594.9	562.2
P22830	FECH	Ferrochelatase, mitochondrial	Homo sapiens	High	12	825.4	522.8	713.6	839.1	694.2	630.3	739.9	731.9	852.3	876.5	665.5
Q9UK73	FEM1B	Protein fem-1 homolog B	Homo sapiens	High	3	38.4	26.2	21.5	25.7	21.7	18	12.1	12.3	40	35.8	10.8
P39748	FEN1	Flap endonuclease 1	Homo sapiens	High	21	2643.5	2193.3	2642.3	2631.3	2728.5	2026	2030.5	2127.3	2587.6	2593.7	2123.1
Q86UX7	FERMT3	Fermitin family homolog 3	Homo sapiens	High	34	2436.4	2811.7	2609.8	2408.7	2640.1	2563.7	2357.1	2368.5	2665.2	2847.6	2532.3
Q5JSP0	FGD3	FYVE, RhoGEF and PH domain-containing protein 3	Homo sapiens	High	11	561.1	551.1	472.4	241	460.9	554.2	489.2	530	446	372.9	504.1
O95684	FGFR1OP	FGFR1 oncogene partner	Homo sapiens	High	6	158.5	210.2	199.4	178.9	190.5	255.5	202.4	219.1	173.9	182.4	254.3
Q9NVK5	FGFR1OP2	FGFR1 oncogene partner 2	Homo sapiens	High	6	106.1	178.3	106.6	120.2	100.8	106.9	84	90.1	119.1	128.7	110.2
P07954	FH	Fumarate hydratase, mitochondrial	Homo sapiens	High	23	2602.5	2896.2	3014.6	2946.3	3126.6	3208.7	4231.8	3830.7	2756.2	2733.1	3480.2
Q13642	FHL1	Four and a half LIM domains protein 1	Homo sapiens	High	4	100.8	112	125.7	108.3	123.6	105	103.8	105.3	93.2	103.6	119.2
Q13643	FHL3	Four and a half LIM domains protein 3	Homo sapiens	High	1	105.4	53.1	79.8	93.1	99.5	50.1	43.2	43.9	72.9	68.6	42
Q9Y613	FHOD1	FH1/FH2 domain-containing protein 1	Homo sapiens	High	15	582	618.6	540	572.1	490	863.7	584.9	581.3	626.9	552.4	715.9
O43427	FIBP	Acidic fibroblast growth factor intracellular-binding protein	Homo sapiens	High	8	460.2	407.1	364.6	401	361.3	403	541.8	565.6	427.3	398.1	402.9
Q92562	FIG4	Polyphosphoinositide phosphatase	Homo sapiens	Medium	1	21	16.5	17.1	19	17.8	26.5	11.3	11.6	23.3	22.1	20.5
Q6PIW4	FIGNL1	Fidgetin-like protein 1	Homo sapiens	High	3	140.9	120.8	118.2	140.5	107.7	117.7	108.5	117.5	140.9	133.4	137.9
Q6UN15	FIP1L1	Pre-mRNA 3'-end-processing factor FIP1	Homo sapiens	High	10	652.3	619.4	622.6	611.9	543.9	619.1	551.1	565	745	772.5	609.5
Q9Y3D6	FIS1	Mitochondrial fission 1 protein	Homo sapiens	High	3	116.7	272.8	185.4	146.3	206.3	241.2	301.7	430.4	125.5	131.3	202.7
Q9NYL4	FKBP11	Peptidyl-prolyl cis-trans isomerase FKBP11	Homo sapiens	High	6	311.7	363.5	395.4	346.2	400.5	330.1	368.2	374.1	331.5	328.5	349.3
Q5T1M5	FKBP15	FK506-binding protein 15	Homo sapiens	High	15	642.6	590.1	539.4	612.1	540.8	920.1	593.7	614.5	758.2	609.5	832.6
P62942	FKBP1A	Peptidyl-prolyl cis-trans isomerase FKBP1A	Homo sapiens	High	7	1126.7	1304	1127	1182.2	1004.5	720.3	507.8	530.1	1206.8	1524.5	602.6
P26885	FKBP2	Peptidyl-prolyl cis-trans isomerase FKBP2	Homo sapiens	High	4	117.2	90.5	113.7	147.5	133.6	121.1	102.5	113	140.8	135	114.1
Q00688	FKBP3	Peptidyl-prolyl cis-trans isomerase FKBP3	Homo sapiens	High	15	1051.6	1284.4	1208.2	1116.7	1327	1205.1	1434.9	1489	1010	1184.4	1292.3
Q02790	FKBP4	Peptidyl-prolyl cis-trans isomerase FKBP4	Homo sapiens	High	40	6090.6	7319	6483.9	5932.1	7367.2	6207	6674	6676.3	5296.1	5493.2	6178.8
Q13451	FKBP5	Peptidyl-prolyl cis-trans isomerase FKBP5	Homo sapiens	High	20	2182.6	2230	2437.6	2223.5	2539	2215.6	2497.3	2655.5	2020.5	1981.2	2394.1
Q9Y680	FKBP7	Peptidyl-prolyl cis-trans isomerase FKBP7	Homo sapiens	High	4	182.9	138	205.3	211.1	161.9	150.4	232.7	241.2	233.9	200.9	188.9
Q14318	FKBP8	Peptidyl-prolyl cis-trans isomerase FKBP8	Homo sapiens	High	9	385	382.4	451.5	431.3	413.5	417.9	493.8	444.8	484.2	455.1	435
Q8NFF5	FLAD1	FAD synthase	Homo sapiens	High	10	375.3	389.6	289.5	369.7	309.4	386.4	295.2	302.2	390.5	421.2	405.5
P20930	FLG	Filaggrin	Homo sapiens	High	3	137.4	116.9	96	118.2	118.7	89.1	62.6	53.3	102.6	112.5	110.1
Q5D862	FLG2	Filaggrin-2	Homo sapiens	High	2	78.4	157.7	81.3	211	85.5	130.1	121	103.4	57.3	90.6	130.6
Q01543	FLI1	Friend leukemia integration 1 transcription factor	Homo sapiens	High	4	373.7	283.9	307.5	386.1	262.6	183.2	117.6	113	459	481.1	202.2
Q13045	FLII	Protein flightless-1 homolog	Homo sapiens	High	33	2260.5	2044.3	2149.1	2326	1967.1	2122.2	1806.3	1892.2	2413.1	2318.8	2142.5
P21333	FLNA	Filamin-A	Homo sapiens	High	104	9312.6	10213.5	10692.6	9697.8	10741.7	9922.1	10185.2	10091.4	10287.6	10269.3	9580.3
O75369	FLNB	Filamin-B	Homo sapiens	High	43	2278.8	2257.9	2469.3	2301.2	2404.5	2248	2457.4	2552.5	2448.7	2320.8	2211.8
Q14315	FLNC	Filamin-C	Homo sapiens	High	5	295.3	319.5	288.8	262.7	273.9	363.2	508.9	501	311.2	310	376.2
O75955	FLOT1	Flotillin-1	Homo sapiens	High	5	214.5	138.2	163.1	179.2	161.8	171.7	153.9	146	187	229.5	181.5
Q14254	FLOT2	Flotillin-2	Homo sapiens	High	7	231.2	210	223.6	261.9	225.4	278.3	246.1	218.6	284.8	259.8	307
Q96CP2	FLYWCH2	FLYWCH family member 2	Homo sapiens	High	2	80	87.9	86.2	90.7	78.2	76.6	80	92.5	73.3	50.3	98.4
O95466-2	FMNL1	Isoform 2 of Formin-like protein 1	Homo sapiens	High	4	110.8	98	91.8	98	104.5	85	91.9	98.2	91.3	92.8	90.6
O95466	FMNL1	Formin-like protein 1	Homo sapiens	High	21	1747	1855.2	1712.5	1636.3	1807	1767.3	1724.6	1816.2	1745.3	1668.7	1773.2
Q06787	FMR1	Synaptic functional regulator FMR1	Homo sapiens	High	9	659.9	444	384.5	395.7	351.1	453.3	379.5	374.7	566.9	615.9	388.8
Q9HA64	FN3KRP	Ketosamine-3-kinase	Homo sapiens	Medium	1	27.3	26.4	17.7	15.3	18.4	25.4	20.6	20.2	32.4	34.1	30
Q96RU3	FNBP1	Formin-binding protein 1	Homo sapiens	High	12	560.6	534.8	509.4	473.9	681.3	674.8	498.8	517.7	441.4	559.8	661.5
Q8N3X1	FNBP4	Formin-binding protein 4	Homo sapiens	High	5	238.7	266.1	218.8	222.7	189.8	236.9	225.8	244.8	248.4	225.3	234.2
Q9Y2H6	FNDC3A	Fibronectin type-III domain-containing protein 3A	Homo sapiens	High	6	250.2	232.6	243.3	247.5	206.3	245.9	222.7	220.4	244	221.1	263.2
Q8TF40	FNIP1	Folliculin-interacting protein 1	Homo sapiens	Medium	1	31.9	20.6	18.8	28.3	22.3	23.5	15.5	17.1	39.5	32.5	21
P49354	FNTA	Protein farnesyltransferase/geranylgeranyltransferase type-1 subunit alpha	Homo sapiens	High	6	223.9	285.4	225.2	243.7	223.2	276.4	222	251.6	239.5	235.4	305.1
P49356	FNTB	Protein farnesyltransferase subunit beta	Homo sapiens	High	2	55.7	29.8	29.2	37.9	35.6	34.8	34.2	26.7	66.8	79.6	39.5
Q5VW36	FOCAD	Focadhesin	Homo sapiens	High	5	311.5	296.9	279.6	317.1	250.4	365.9	268	265.2	360.3	283.4	363.8
P85037	FOXK1	Forkhead box protein K1	Homo sapiens	High	11	1444.9	1048.7	1222.8	1203.4	1174.8	992.4	731	761.8	1508	1282.6	862.8
Q01167	FOXK2	Forkhead box protein K2	Homo sapiens	High	5	167	177.9	186.8	168.6	193.5	141.4	146.1	153.8	156	153.6	155.8
O43524	FOXO3	Forkhead box protein O3	Homo sapiens	High	1	19.4	20	12.6	14.7	15.7	19.8	11.7	12.7	21.2	22.5	19.4
Q8IVH2	FOXP4	Forkhead box protein P4	Homo sapiens	Medium	1	45.8	36.3	36.4	50.7	30.3	28.8	19.9	26.2	54.4	63.1	29.4
Q96CU9	FOXRED1	FAD-dependent oxidoreductase domain-containing protein 1	Homo sapiens	High	8	500.4	463.4	451.1	524.9	438.7	452.4	421.6	375.6	534.3	528.1	477.2
Q8IWF2	FOXRED2	FAD-dependent oxidoreductase domain-containing protein 2	Homo sapiens	High	2	112.1	95.8	63.3	82.5	54.5	70.9	56.7	55.3	63.1	76.7	72.4
Q05932	FPGS	Folylpolyglutamate synthase, mitochondrial	Homo sapiens	High	3	65.9	60.3	50.7	59.2	51.9	78.3	51.7	54.9	70.9	70.7	65.9
O14772	FPGT	Fucose-1-phosphate guanylyltransferase	Homo sapiens	High	1	24.1	40.9	35.6	34.4	37.7	37.3	29.4	32.9	21.2	36.6	44.1
Q70Z53	FRA10AC1	Protein FRA10AC1	Homo sapiens	High	1	64.3	25.3	32.2	48.6	34.1	20.7	15.7	16	50.4	52.8	24.1
Q14331	FRG1	Protein FRG1	Homo sapiens	High	6	911.8	637.4	712	785.8	661	469.7	397.5	419.2	820.4	752.7	459.6
Q6ZNA5	FRRS1	Ferric-chelate reductase 1	Homo sapiens	Medium	1	293.9	151.5	223	335.4	200.4	144.8	90.5	85.3	400.5	371.2	130.5
O94915	FRYL	Protein furry homolog-like	Homo sapiens	High	3	52.1	74.7	44.1	54.4	45.5	86.5	48.6	41.7	54.1	60.5	78.5
O95073	FSBP	Fibrinogen silencer-binding protein	Homo sapiens	Medium	1	7.4	10.3	7.6	5.2	3.3	68.8	59.9	60.2	7.9	2.8	67.3
Q16658	FSCN1	Fascin	Homo sapiens	High	30	2476.5	2557.9	2251.9	2298.2	2188.6	2284.3	1859.3	1766.1	2355.6	2660.2	2233.5
Q9BTV5	FSD1	Fibronectin type III and SPRY domain-containing protein 1	Homo sapiens	High	3	130.2	89.6	79.6	98	69.6	96.4	69.4	62.9	99.6	103.9	106.7
P02794	FTH1	Ferritin heavy chain	Homo sapiens	High	3	80.6	112.6	120.7	119.1	93.2	223.5	138.3	123.6	128.2	105.6	156.9
P02792	FTL	Ferritin light chain	Homo sapiens	High	4	151.3	121.7	193.4	198.8	168.6	113.9	147.5	157.7	178.3	151.8	124
Q9C0B1	FTO	Alpha-ketoglutarate-dependent dioxygenase FTO	Homo sapiens	High	12	521.8	641	585.8	636.2	618.5	751.1	595.9	632.1	558.1	630.4	712.3
Q9UET6	FTSJ1	Putative tRNA (cytidine(32)/guanosine(34)-2'-O)-methyltransferase	Homo sapiens	High	4	257.5	198.2	286.4	235.7	305.9	171	329.1	359.5	237.6	223.1	192.2
Q8IY81	FTSJ3	pre-rRNA processing protein FTSJ3	Homo sapiens	High	25	2869	2401.8	2220.2	2141.2	2058.3	2283.3	2122.4	1914.1	2609	2442	2288.4
Q96AE4-2	FUBP1	Isoform 2 of Far upstream element-binding protein 1	Homo sapiens	High	5	45.8	56	42	47.2	36.2	52.8	35.9	31.5	59	54.7	64.4
Q96AE4	FUBP1	Far upstream element-binding protein 1	Homo sapiens	High	25	4030.3	4622.3	4397.1	4524.4	4448.4	4243.5	4081.3	4116.8	4335	4389.1	4231.4
Q96I24	FUBP3	Far upstream element-binding protein 3	Homo sapiens	High	18	1308.6	1225.6	1184.3	1312.8	1261.8	1279.5	1115.3	1088.2	1412.4	1288.7	1270.3
Q9BWH2	FUNDC2	FUN14 domain-containing protein 2	Homo sapiens	High	3	165.4	230.2	237.2	194	236.7	217.2	195	171.7	169	154.5	234.5
P35637	FUS	RNA-binding protein FUS	Homo sapiens	High	10	1557	2013.6	1822	1733	2098.6	1841	2074.5	2120.7	1630.1	1813.3	1865.6
P22083	FUT4	Alpha-(1,3)-fucosyltransferase 4	Homo sapiens	Medium	1	36.1	23.2	37.8	34.8	48.3	28.8	21.9	25.6	34.5	29.8	20.2
Q9BYC5	FUT8	Alpha-(1,6)-fucosyltransferase	Homo sapiens	High	4	115.5	108.5	116.7	128.6	113.6	193.8	97.5	85.8	158.4	174.5	189.8
Q16595	FXN	Frataxin, mitochondrial	Homo sapiens	High	5	271.8	352.5	384.2	350.8	398.3	392.4	663	599.3	324.7	334.7	367.9
P51114	FXR1	Fragile X mental retardation syndrome-related protein 1	Homo sapiens	High	21	1710.8	1689.6	1409.6	1588.4	1369.1	1683.3	1332.2	1434.5	1629.5	1623.3	1481.5
P51116	FXR2	Fragile X mental retardation syndrome-related protein 2	Homo sapiens	High	7	307.9	237.9	228	268.5	204.2	217.9	150.2	157.3	300.4	375.1	504.4
Q9BQS8	FYCO1	FYVE and coiled-coil domain-containing protein 1	Homo sapiens	High	3	90.5	82.5	70.9	99.4	69.2	65.8	35.9	36.5	109.5	121.3	65.1
P06241	FYN	Tyrosine-protein kinase Fyn	Homo sapiens	High	2	271.6	200.8	209.9	227.8	189.1	220.5	177.2	190.2	281.9	224.4	207.2
O60353	FZD6	Frizzled-6	Homo sapiens	High	1	39.6	32.4	18.9	30.3	14.5	25	18.3	19.8	43.5	26.4	28
Q13283	G3BP1	Ras GTPase-activating protein-binding protein 1	Homo sapiens	High	12	3282.3	2392.2	2439.3	2532.2	2651.2	1693.5	1544	1570.5	2769	2351.5	1538.9
Q9UN86	G3BP2	Ras GTPase-activating protein-binding protein 2	Homo sapiens	High	15	2187.3	1914.8	1697.9	1882	1729.9	1522.5	1421.7	1439.4	2044.2	1826.9	1542.1
P11413	G6PD	Glucose-6-phosphate 1-dehydrogenase	Homo sapiens	High	23	2859.2	2451.3	2494.2	2822.2	2583.1	2329.6	1927.8	2085.1	2919.9	3008.5	2191.8
O95166	GABARAP	Gamma-aminobutyric acid receptor-associated protein	Homo sapiens	High	4	194.1	338.5	272.2	207.2	284.7	341.8	496.1	543.4	173.3	177.4	412.2
P60520	GABARAPL2	Gamma-aminobutyric acid receptor-associated protein-like 2	Homo sapiens	High	6	509	559.8	634.3	624.2	668.7	613.4	694.8	713	514.9	507.1	636.3
Q06546	GABPA	GA-binding protein alpha chain	Homo sapiens	High	14	788.9	1004	791.8	812.4	667.7	906.7	669.2	673.9	777.5	908	963.8
Q8TAE8	GADD45GIP1	Growth arrest and DNA damage-inducible proteins-interacting protein 1	Homo sapiens	High	6	345	483.1	351.7	386.5	343.2	398.6	378.3	368.2	382.1	416.2	410.6
NL433	gag	Gag polyprotein	Human immunodeficiency virus type 1 (NL4.3) OX=11706	High	6	36.5	25.5	578.3	548.7	598.5	546.1	828	855.3	584.2	573	598.1
NL435	gag-pol	Gag-Pol polyprotein	Human immunodeficiency virus type 1 (NL4.3) OX=11706	High	12	286.1	467.3	2056.8	2271.3	1822.6	2321	2160.8	2227.7	2836.1	2575.5	2655.1
O14976	GAK	Cyclin-G-associated kinase	Homo sapiens	High	21	778.5	940.4	829.7	861.5	832.6	947.7	785.4	796.8	859.7	869.4	840.9
Q14376	GALE	UDP-glucose 4-epimerase	Homo sapiens	High	5	508.2	399.4	400.5	506.3	377.6	462	328.3	374.8	486.8	538	447.7
P51570	GALK1	Galactokinase	Homo sapiens	High	19	938.9	724	680.9	768.6	682.7	673.8	479	478	927.4	990.7	655.7
Q01415	GALK2	N-acetylgalactosamine kinase	Homo sapiens	High	4	176.4	130.4	99.5	160.7	127	143	116.7	134.4	158.5	148.9	147.6
P34059	GALNS	N-acetylgalactosamine-6-sulfatase	Homo sapiens	High	3	255.7	160	166.2	245	160.5	165	123.8	134.6	249.4	224.5	154.7
Q10472	GALNT1	Polypeptide N-acetylgalactosaminyltransferase 1	Homo sapiens	High	2	68.3	53	64.4	74.5	52.1	72	77.8	92.8	62.2	69.3	63
Q10471	GALNT2	Polypeptide N-acetylgalactosaminyltransferase 2	Homo sapiens	High	17	844.7	887.5	992.2	941.6	971	925	1044.4	1064.6	872.3	939.5	913.6
Q8N4A0	GALNT4	Polypeptide N-acetylgalactosaminyltransferase 4	Homo sapiens	High	1	23.6	20	10.9	19.4	10.7	16.6	12.2	14.3	20.6	30.8	24.4
Q8NCL4	GALNT6	Polypeptide N-acetylgalactosaminyltransferase 6	Homo sapiens	High	5	146.7	220	192.3	194.7	193.4	273.9	287.9	254.8	160.4	190	274.5
Q86SF2	GALNT7	N-acetylgalactosaminyltransferase 7	Homo sapiens	High	10	503.7	588.1	600	606.4	561.6	645.7	640.9	639.2	532.5	573.7	674.1
P07902	GALT	Galactose-1-phosphate uridylyltransferase	Homo sapiens	High	3	93.4	94	103.8	105	89.8	137.2	83.9	86.7	95.4	102.9	150.3
Q14353	GAMT	Guanidinoacetate N-methyltransferase	Homo sapiens	High	5	401.9	412	415.1	418.2	435.7	433.5	404.1	419.2	376.9	380.8	416.1
Q9H2C0	GAN	Gigaxonin	Homo sapiens	High	7	374	270.2	248.5	344.8	250.2	304.9	161.9	178.2	372.9	390.1	308.4
Q14697	GANAB	Neutral alpha-glucosidase AB	Homo sapiens	High	41	4426.5	3238.5	4030	4228.9	3799	3812.9	3706.3	3623.1	5017.7	4543.9	3940.9
P04406	GAPDH	Glyceraldehyde-3-phosphate dehydrogenase	Homo sapiens	High	29	14288.4	10844.8	18441	15665.8	19320.1	11700.3	16848.8	15114.8	13315.2	12993.8	11285.9
Q14C86	GAPVD1	GTPase-activating protein and VPS9 domain-containing protein 1	Homo sapiens	High	28	1412.5	1368.5	1154.4	1341.3	1137.2	1299.1	973.4	994.4	1414.3	1343.8	1304.4
Q9NY12	GAR1	H/ACA ribonucleoprotein complex subunit 1	Homo sapiens	High	8	717.8	858.6	865.6	750.4	746.8	778	711.1	723.2	711.9	684.9	724.5
P41250	GARS	Glycine--tRNA ligase	Homo sapiens	High	33	4098.8	4590.2	4320.2	4259.2	4583.9	4747.5	4798.6	4875.7	4070.6	4041.7	4889.6
P22102	GART	Trifunctional purine biosynthetic protein adenosine-3	Homo sapiens	High	45	5361.1	5520.1	5306.8	5102.9	5650.9	4680.5	4388.7	4497.4	5064.5	5208.4	4458.7
Q99501	GAS2L1	GAS2-like protein 1	Homo sapiens	High	7	262.5	176.1	156.8	204.3	162.4	165.8	104.9	108.2	221.8	216.7	149.7
O60861	GAS7	Growth arrest-specific protein 7	Homo sapiens	Medium	1	40.2	33.1	26.7	33.3	24.3	50.2	24.5	28.7	36.3	42.8	42.5
P23769	GATA2	Endothelial transcription factor GATA-2	Homo sapiens	High	1	29.7	15.5	34.2	25.6	26.1	23.5	39.3	42.5	22.6	24.4	28.2
Q8WUU5	GATAD1	GATA zinc finger domain-containing protein 1	Homo sapiens	High	1	23.4	21.1	25.6	26.1	25.5	26.7	18.4	13.4	35.3	20.7	23.4
Q86YP4	GATAD2A	Transcriptional repressor p66-alpha	Homo sapiens	High	9	593	586.1	640	621.6	605.7	480.7	419.4	421.5	619.5	630.3	438.6
Q8WXI9	GATAD2B	Transcriptional repressor p66-beta	Homo sapiens	High	8	580.8	600.6	553.9	562.7	603.5	459	600.2	518.5	507.2	577	535.3
O75879	GATB	Glutamyl-tRNA(Gln) amidotransferase subunit B, mitochondrial	Homo sapiens	High	10	352.9	271.8	284.8	389.1	241.8	262.8	210	193.5	400.7	410.4	277.6
O43716	GATC	Glutamyl-tRNA(Gln) amidotransferase subunit C, mitochondrial	Homo sapiens	High	2	273.7	197.6	216.3	296.2	214.1	187	182.7	182.1	316	294.7	169.9
Q8WTX7	GATSL3	GATS-like protein 3	Homo sapiens	High	2	186.7	107.8	130.8	167.3	105.5	111.1	70	75.5	196.5	161.6	111.2
P04062	GBA	Glucosylceramidase	Homo sapiens	High	5	153.4	154.9	118.2	153.4	126.4	158.4	112.6	122.3	146.7	164	130.7
Q9HCG7	GBA2	Non-lysosomal glucosylceramidase	Homo sapiens	High	2	49.7	37.2	33.8	59.5	33.1	39.4	28.2	25.3	69.5	68.5	52.1
O75323	GBAS	Protein NipSnap homolog 2	Homo sapiens	High	7	330.2	298	495.4	379.5	471.2	305	646.6	561.8	421.1	425.8	318
Q04446	GBE1	1,4-alpha-glucan-branching enzyme	Homo sapiens	High	17	1657.6	1273.9	1431.7	1542.3	1394	1229	895	903.9	1716.8	1837.8	1211.7
Q92538	GBF1	Golgi-specific brefeldin A-resistance guanine nucleotide exchange factor 1	Homo sapiens	High	19	1089.5	901.8	1077.2	1195.1	1017.4	876.3	909.5	953.1	1370.5	1269.5	858.4
P32455	GBP1	Guanylate-binding protein 1	Homo sapiens	High	9	362.4	382.6	463	390.3	450.8	402.4	582.4	624.3	396.4	372.2	454.1
Q96PP8	GBP5	Guanylate-binding protein 5	Homo sapiens	High	5	186.6	204	171.3	199.3	190.6	322.8	233.3	247.2	184.1	206.2	282.9
P28676	GCA	Grancalcin	Homo sapiens	High	2	224.2	118.6	136.5	222.7	134.2	131.4	94.4	89.9	244.6	224.3	148.5
O75600	GCAT	2-amino-3-ketobutyrate coenzyme A ligase, mitochondrial	Homo sapiens	High	6	228.2	214.6	165.7	198.6	180.1	170.7	146.6	134.2	178.5	216.6	162.2
Q96CN9	GCC1	GRIP and coiled-coil domain-containing protein 1	Homo sapiens	High	8	239.3	245.8	225.6	263.8	226.4	315.4	222.6	237.3	274	264.6	292.2
Q8IWJ2	GCC2	GRIP and coiled-coil domain-containing protein 2	Homo sapiens	High	2	58.6	52.7	51.5	56.7	45	58.1	52.4	50.6	57.8	57.1	58.5
Q92947	GCDH	Glutaryl-CoA dehydrogenase, mitochondrial	Homo sapiens	High	6	321.2	297.2	359.1	393	350	286	282.5	257.1	355.2	356.3	274.6
P16383	GCFC2	GC-rich sequence DNA-binding factor 2	Homo sapiens	High	10	596.6	556.6	552.9	594.6	551.6	568.6	494.6	521.7	617.2	546	602.4
P30047	GCHFR	GTP cyclohydrolase 1 feedback regulatory protein	Homo sapiens	High	2	55	48.4	44.8	63	50.4	50.2	36.5	43	67.3	70.1	32.6
P48506	GCLC	Glutamate--cysteine ligase catalytic subunit	Homo sapiens	High	20	1186.3	1252.8	1118.7	1152.2	1189.6	1226.3	1076	1026.8	1110.3	1149.9	1220.5
P48507	GCLM	Glutamate--cysteine ligase regulatory subunit	Homo sapiens	High	5	348.8	341.4	371	366.3	369.2	288	307.9	327.7	350.2	345.3	331.1
Q92616	GCN1	eIF-2-alpha kinase activator GCN1	Homo sapiens	High	98	9074.5	9134.5	8201	8572.4	7886.8	8472.3	6889.6	7067.9	8774.5	8357.9	8346.4
P23434	GCSH	Glycine cleavage system H protein, mitochondrial	Homo sapiens	High	2	237.1	327.3	287.5	324.6	256.9	308.2	260.4	242.8	287.5	292.2	280.8
Q8TB36	GDAP1	Ganglioside-induced differentiation-associated protein 1	Homo sapiens	High	3	225	121.9	152.6	205	137.3	132.6	92.7	82.7	230.6	180.7	132.3
Q9NXN4	GDAP2	Ganglioside-induced differentiation-associated protein 2	Homo sapiens	High	4	138.6	127.3	115.6	156	114.5	114.4	106.3	100.8	161.9	145.6	114.5
P31150	GDI1	Rab GDP dissociation inhibitor alpha	Homo sapiens	High	11	726.1	721.2	576.3	737.2	557.1	701.2	475.7	454.2	753.2	787.7	727.8
P50395	GDI2	Rab GDP dissociation inhibitor beta	Homo sapiens	High	26	4926.5	6056.4	4920.8	4822.3	5352.8	5917.1	5268.6	5583.2	4340.5	4521.5	5654.8
Q6ZNW5	GDPGP1	GDP-D-glucose phosphorylase 1	Homo sapiens	High	3	184.6	147.4	123	168.7	106.9	112.9	54.6	57.3	199.1	179.3	100.4
P57678	GEMIN4	Gem-associated protein 4	Homo sapiens	High	24	1472.6	1408.7	1240.1	1355.9	1283.5	1229.8	1208.5	1263.7	1501.4	1467.9	1261.7
Q8TEQ6	GEMIN5	Gem-associated protein 5	Homo sapiens	High	40	3630.4	3359.8	2830.5	3007.6	2753	2566.4	2076.9	2128	3438.4	3529.2	2559.1
Q8WXD5	GEMIN6	Gem-associated protein 6	Homo sapiens	High	2	85.2	143.6	90.4	85	100.3	125	100.8	103	84.3	93.4	115.8
Q9H840	GEMIN7	Gem-associated protein 7	Homo sapiens	High	1	51.6	34.7	25.8	32.5	18.9	28.7	23.3	20.9	41.4	28.3	27.6
Q9NWZ8	GEMIN8	Gem-associated protein 8	Homo sapiens	High	1	49	56.1	41.2	48.2	25.3	39.1	20.3	16.8	55.3	40.3	34
Q7L5D6	GET4	Golgi to ER traffic protein 4 homolog	Homo sapiens	High	9	971.4	821.8	720.6	875.4	739.2	800.7	532.6	550.6	906.1	1003.5	779.2
Q96RP9	GFM1	Elongation factor G, mitochondrial	Homo sapiens	High	24	2076.4	2071	2054.4	2334.2	2091.2	1528.1	1977.7	1797.5	2177.7	2081.6	1710.2
Q969S9	GFM2	Ribosome-releasing factor 2, mitochondrial	Homo sapiens	High	7	274	223	183.9	245.2	166.5	272.9	165.3	186.8	276.7	269.8	261.4
Q06210	GFPT1	Glutamine--fructose-6-phosphate aminotransferase [isomerizing] 1	Homo sapiens	High	32	3696.5	3203.5	3339.6	3528	3189.8	3005.7	2699.5	2865.5	3472.3	3562.8	2998.6
Q9UJY5	GGA1	ADP-ribosylation factor-binding protein GGA1	Homo sapiens	High	3	55.4	163.1	98.4	68.6	127.5	205.8	200.4	220.8	52.7	61.9	184.4
Q9UJY4	GGA2	ADP-ribosylation factor-binding protein GGA2	Homo sapiens	High	2	107.3	74.9	93.5	103.4	84.7	65	61.2	59.5	104.8	121.9	71.2
Q9NZ52	GGA3	ADP-ribosylation factor-binding protein GGA3	Homo sapiens	High	3	125.2	144.4	137	132.2	127.4	166.3	128.1	130.9	127.7	108.7	146.1
O75223	GGCT	Gamma-glutamylcyclotransferase	Homo sapiens	High	8	432.6	783.7	478.7	480.7	542.6	717.6	608	589.9	420.5	505.9	738.9
Q92820	GGH	Gamma-glutamyl hydrolase	Homo sapiens	High	9	481.2	403.7	428.3	540.3	467.8	472.3	400.8	379.3	513.8	333.5	392.1
P19440	GGT1	Gamma-glutamyltranspeptidase 1	Homo sapiens	High	3	124.7	120.4	94.8	113.7	90.8	132.9	82.4	77.3	122	136.9	139.3
Q9UJ14	GGT7	Gamma-glutamyltransferase 7	Homo sapiens	Medium	1	41.5	25.5	29.6	42	32.5	26.6	23.2	24.6	47.7	42.1	31.4
Q8N2G8	GHDC	GH3 domain-containing protein	Homo sapiens	High	5	202.6	158.6	189.9	285.5	180.8	168.8	121.1	126.2	267.2	267	176.3
Q9H3K2	GHITM	Growth hormone-inducible transmembrane protein	Homo sapiens	High	3	205.1	208.4	282.4	254.6	258.9	212.3	329.7	318.3	200.6	206	242.5
Q8IVV7	GID4	Glucose-induced degradation protein 4 homolog	Homo sapiens	High	3	147	110.4	92	102.5	87.2	99.8	109.1	97.8	128	148.5	101.5
[truncated: 4,298 more rows]
