# Supplementary material for: Antagonism of PP2A is an independent and conserved function of HIV-1 Vif and causes cell cycle arrest
Source: eLife journal article supplement (doi:10.7554/elife.53036), 2020-04-15

Figure 1–figure supplement 1

A

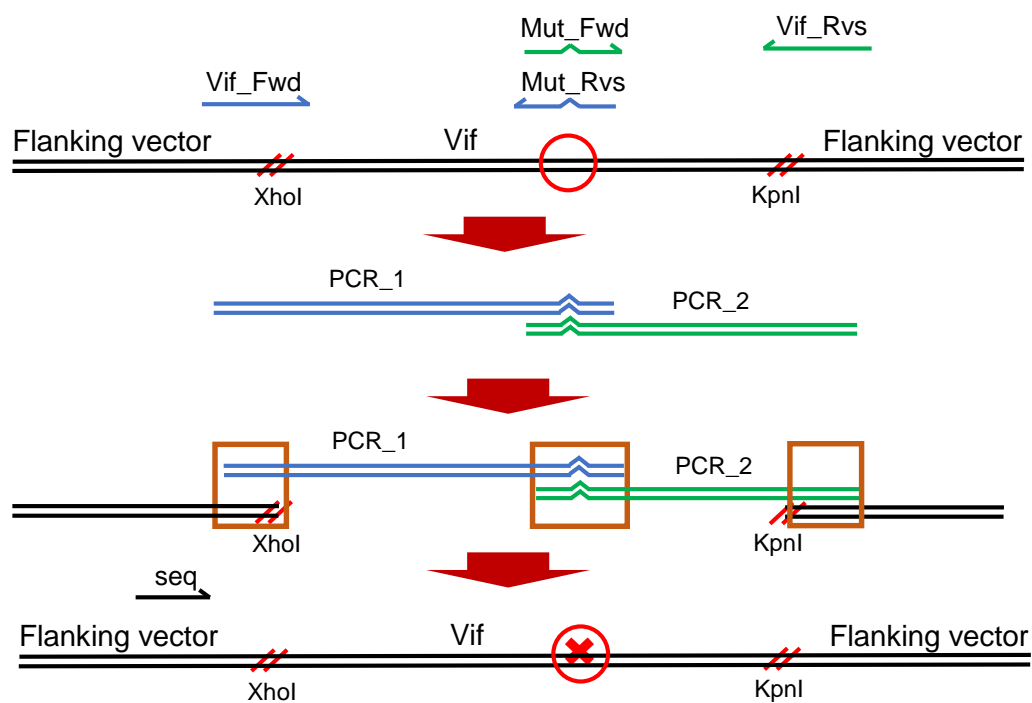

B

293T cells stably expressing  
HA-tagged PPP2R5B or APOBEC3G

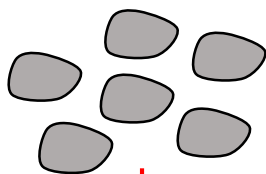

Transfect with  
GFP-P2A-**Vif**  
mutant library

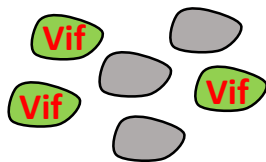

Analyse by intracellular  
flow cytometry

C

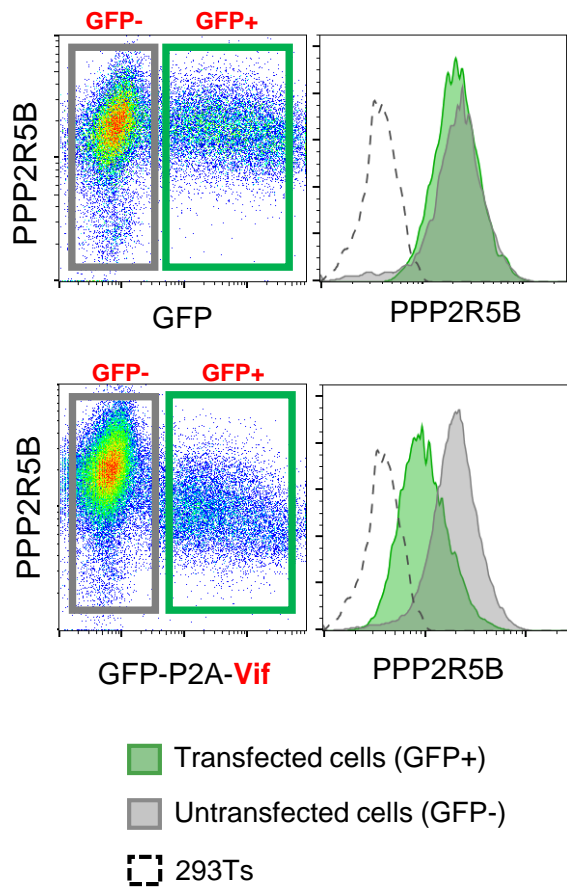

Supplement: supp [file elife_poa_e53036_Figure_1_figure_supplement_1.pdf › elife_poa_e53036_Figure_1_figure_supplement_1.pdf]
