# Supplementary figures and images for: Antagonism of PP2A is an independent and conserved function of HIV-1 Vif and causes cell cycle arrest
Source: eLife journal article supplement (doi:10.7554/elife.53036), 2020-04-15

Figure 1–figure supplement 2

A

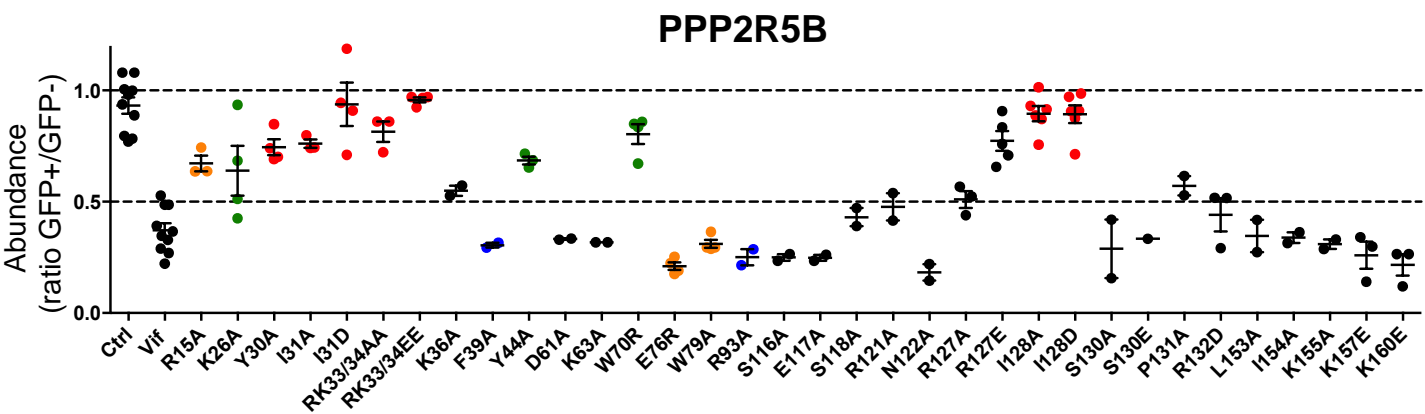

B

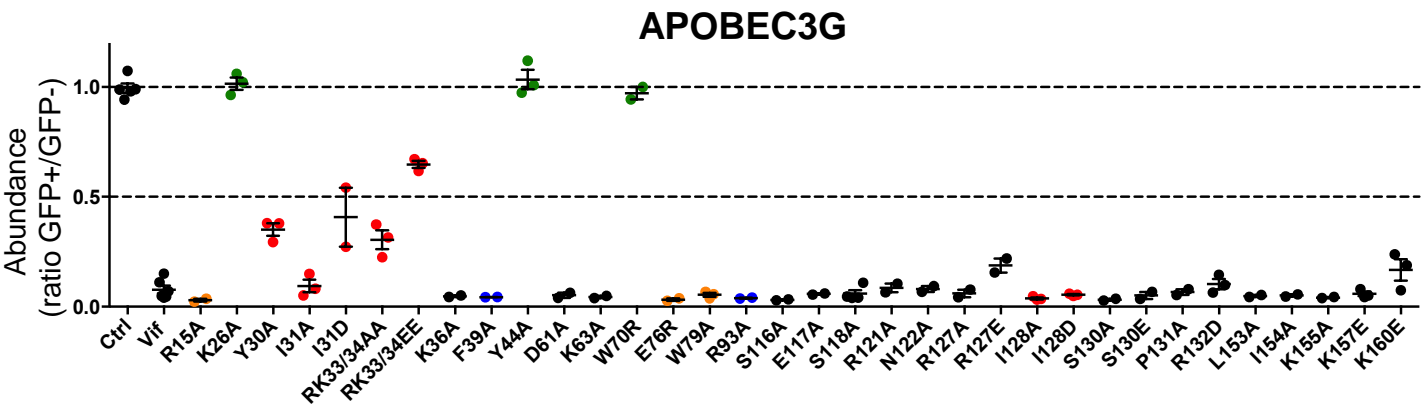

C

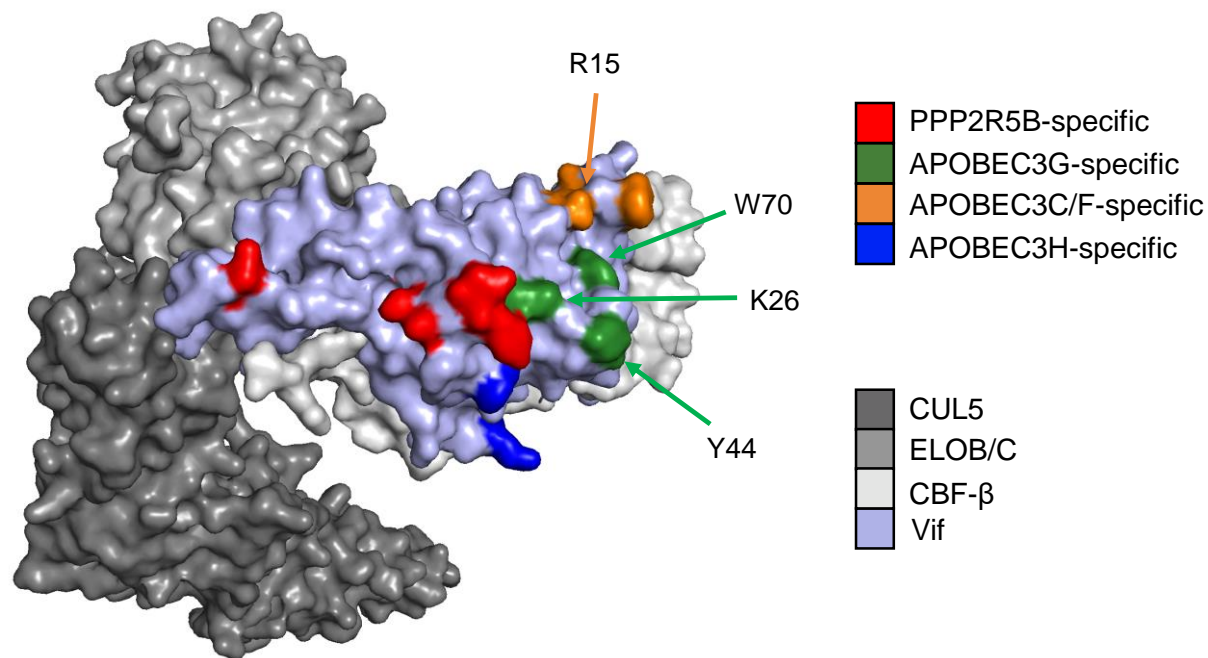

Supplement: supp [file elife_poa_e53036_Figure_1_figure_supplement_2.pdf › elife_poa_e53036_Figure_1_figure_supplement_2.pdf]

Figure 1–figure supplement 3

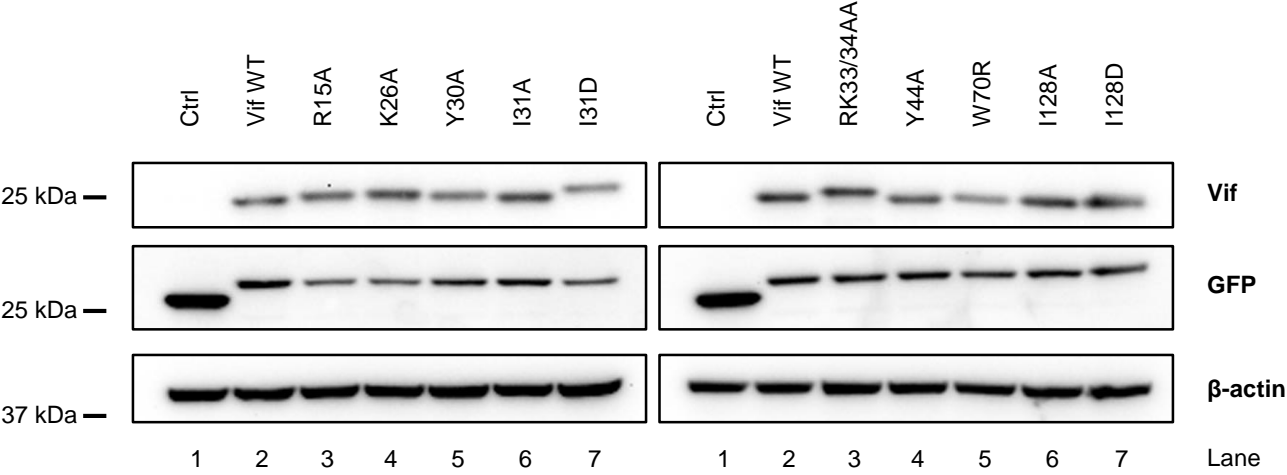

Supplement: supp [file elife_poa_e53036_Figure_1_figure_supplement_3.pdf › elife_poa_e53036_Figure_1_figure_supplement_3.pdf]

Figure 1–figure supplement 4

A

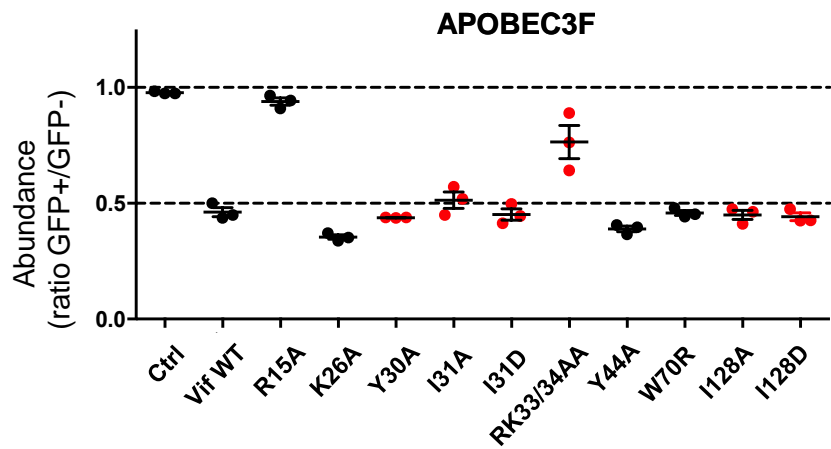

B

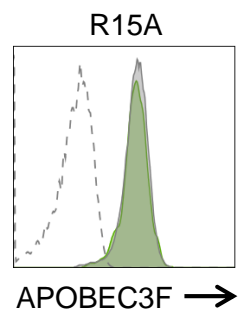

C

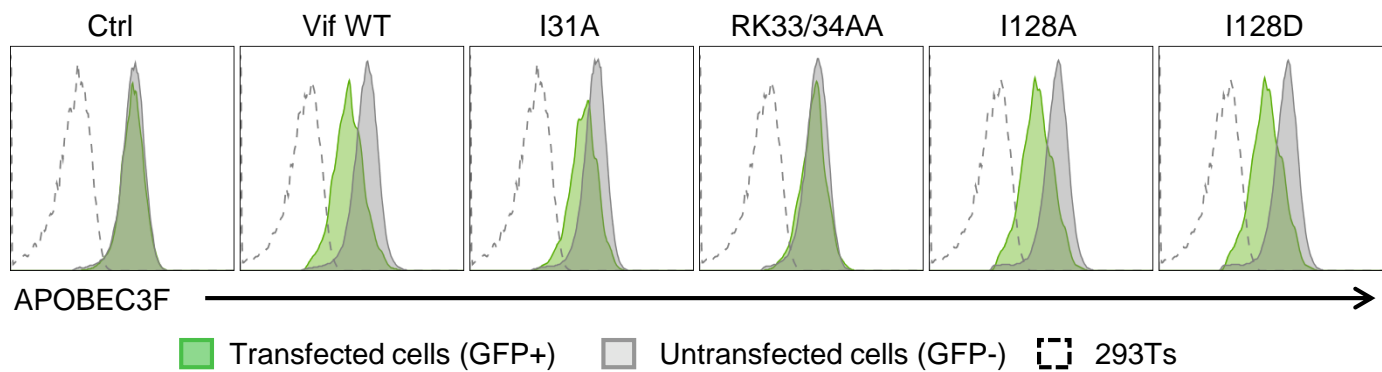

Supplement: supp [file elife_poa_e53036_Figure_1_figure_supplement_4.pdf › elife_poa_e53036_Figure_1_figure_supplement_4.pdf]

Figure 2—figure supplement 1

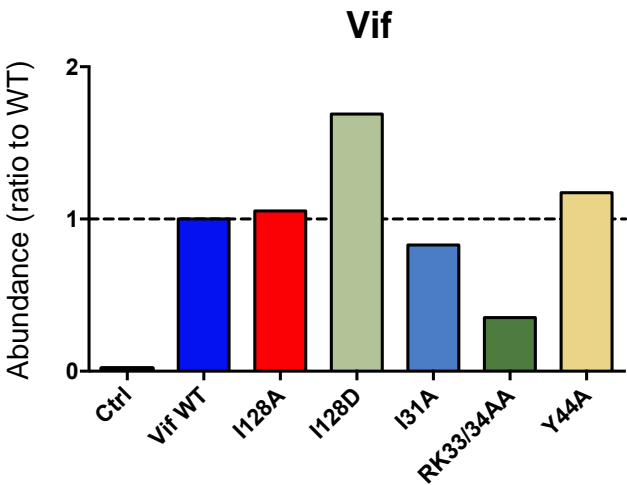

Supplement: supp [file elife_poa_e53036_Figure_2_figure_supplement_1.pdf › elife_poa_e53036_Figure_2_figure_supplement_1.pdf]

Figure 2–figure supplement 2

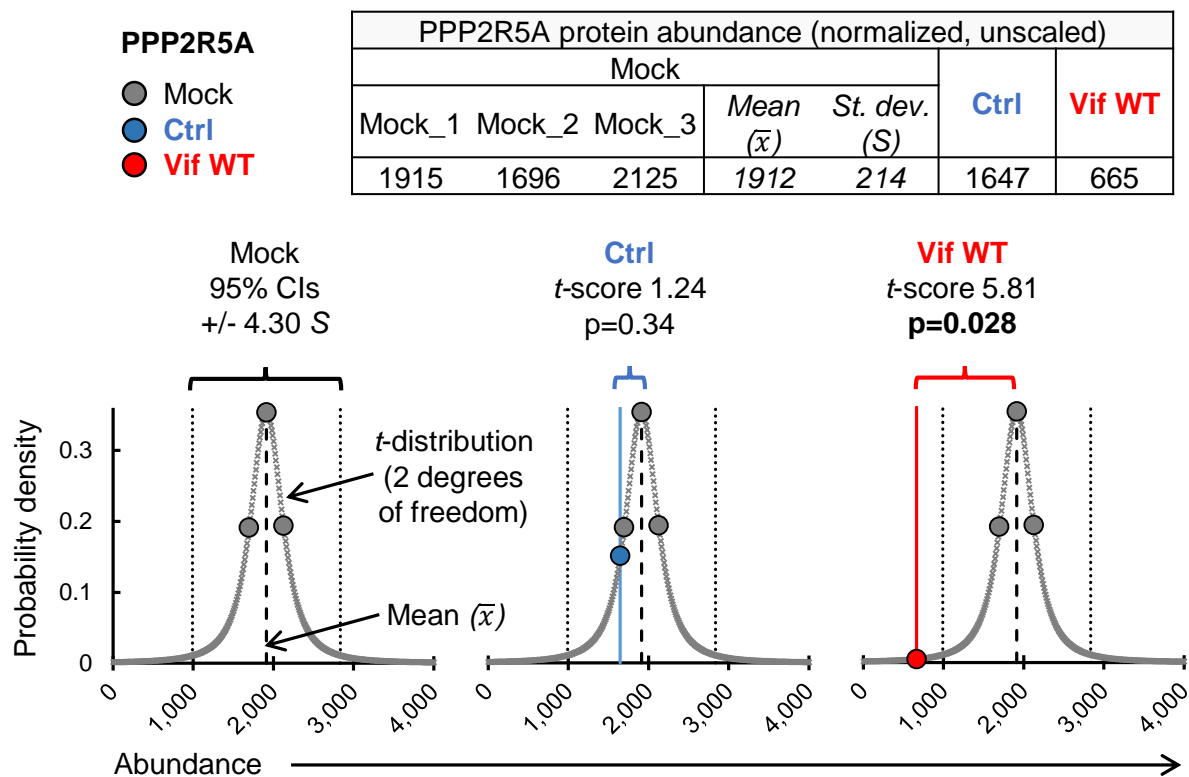

Supplement: supp [file elife_poa_e53036_Figure_2_figure_supplement_2.pdf › elife_poa_e53036_Figure_2_figure_supplement_2.pdf]

Figure 3–figure supplement 1

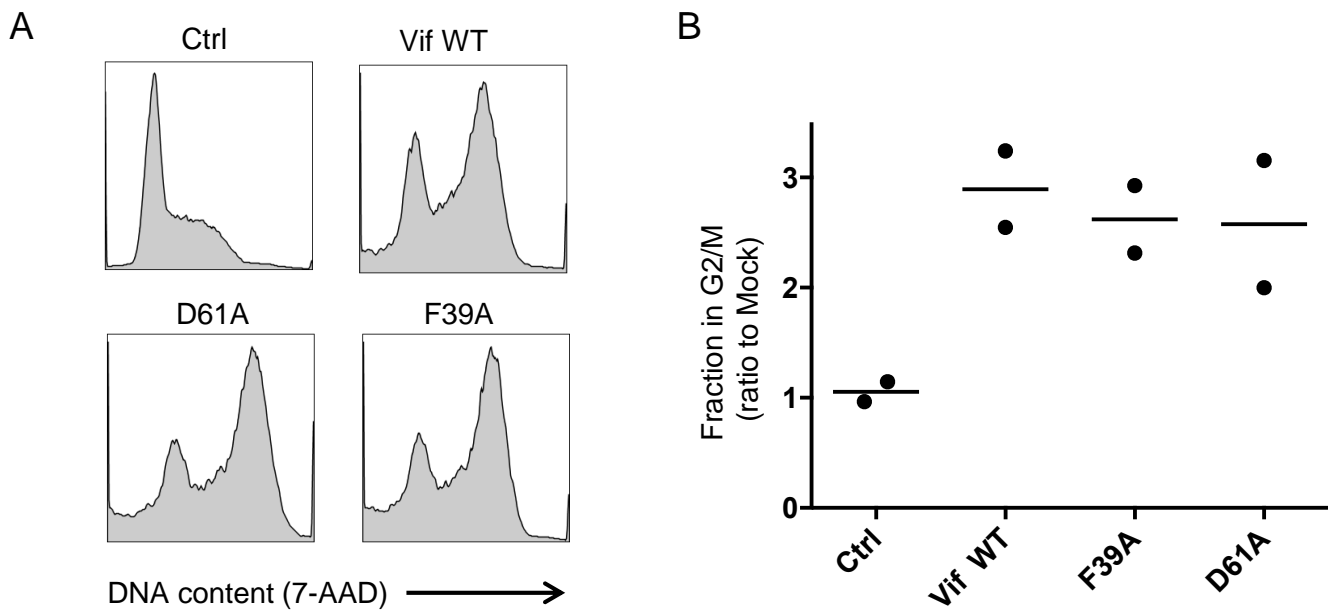

Supplement: supp [file elife_poa_e53036_Figure_3_figure_supplement_1.pdf › elife_poa_e53036_Figure_3_figure_supplement_1.pdf]

Figure 3—figure supplement 2

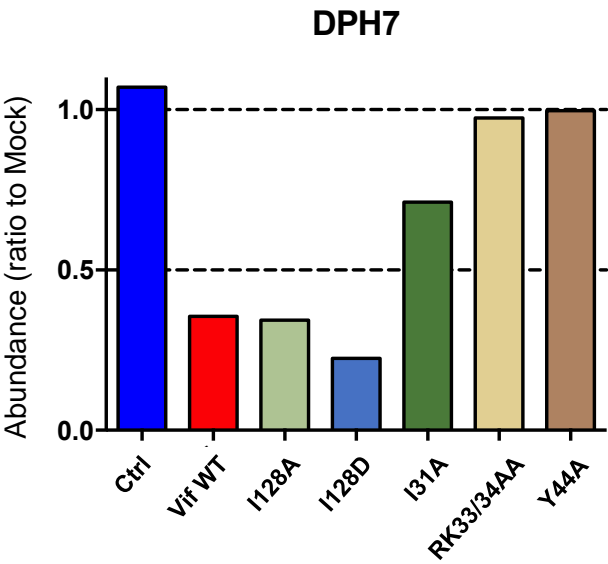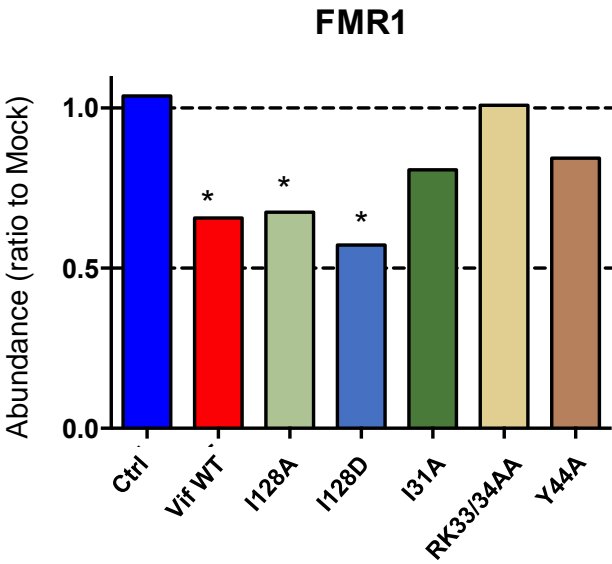

Supplement: supp [file elife_poa_e53036_Figure_3_figure_supplement_2.pdf › elife_poa_e53036_Figure_3_figure_supplement_2.pdf]

Figure 4–figure supplement 1

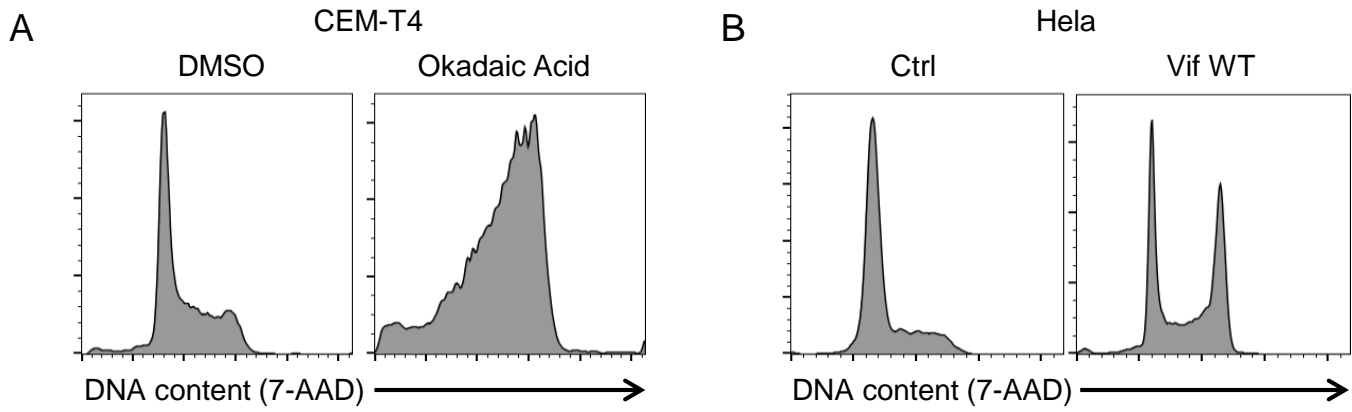

Supplement: supp [file elife_poa_e53036_Figure_4_figure_supplement_1.pdf › elife_poa_e53036_Figure_4_figure_supplement_1.pdf]

Figure 4–figure supplement 2

A

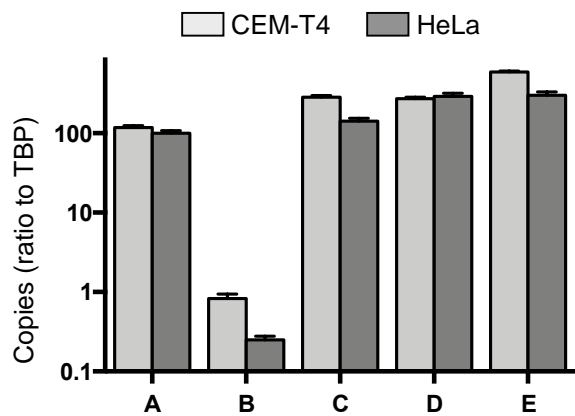

C

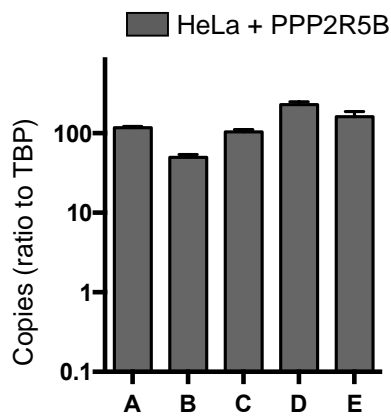

B

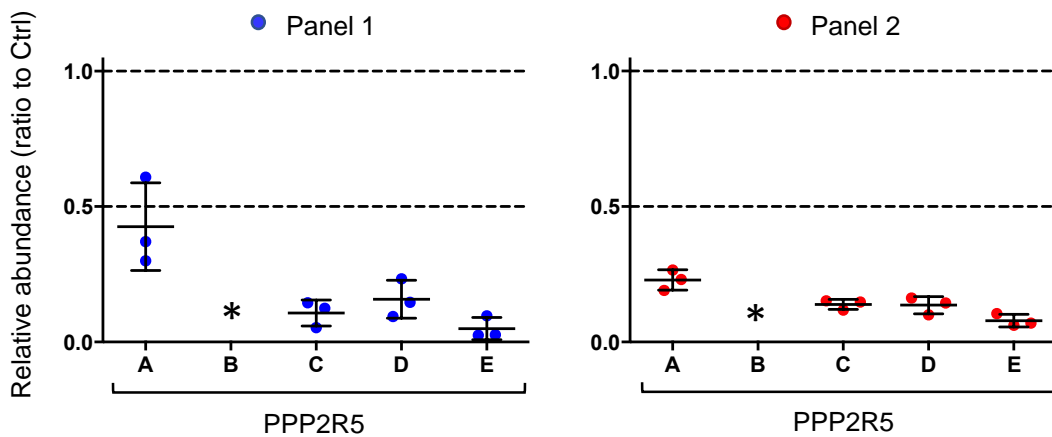

D

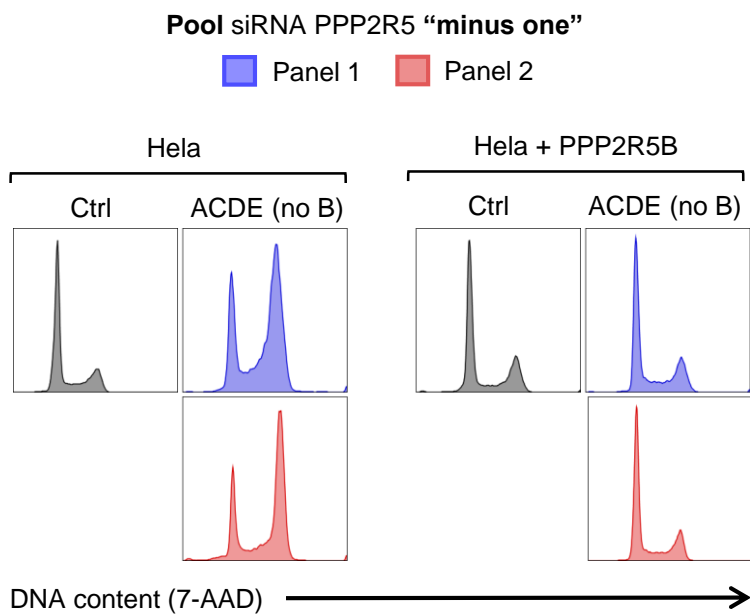

E

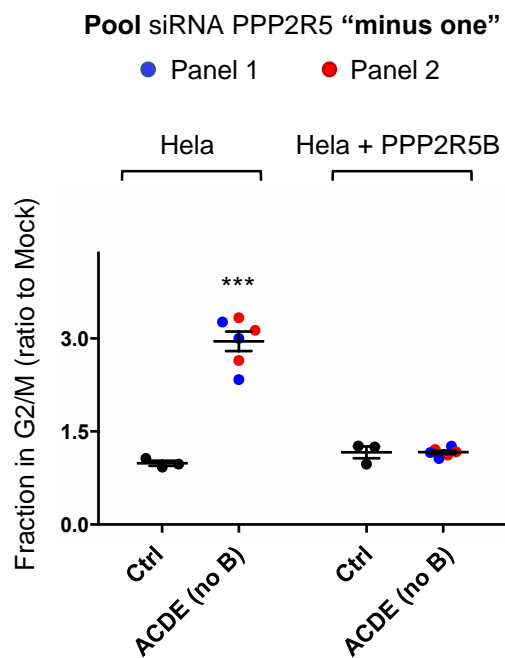

Supplement: supp [file elife_poa_e53036_Figure_4_figure_supplement_2.pdf › elife_poa_e53036_Figure_4_figure_supplement_2.pdf]

Figure 4–figure supplement 3

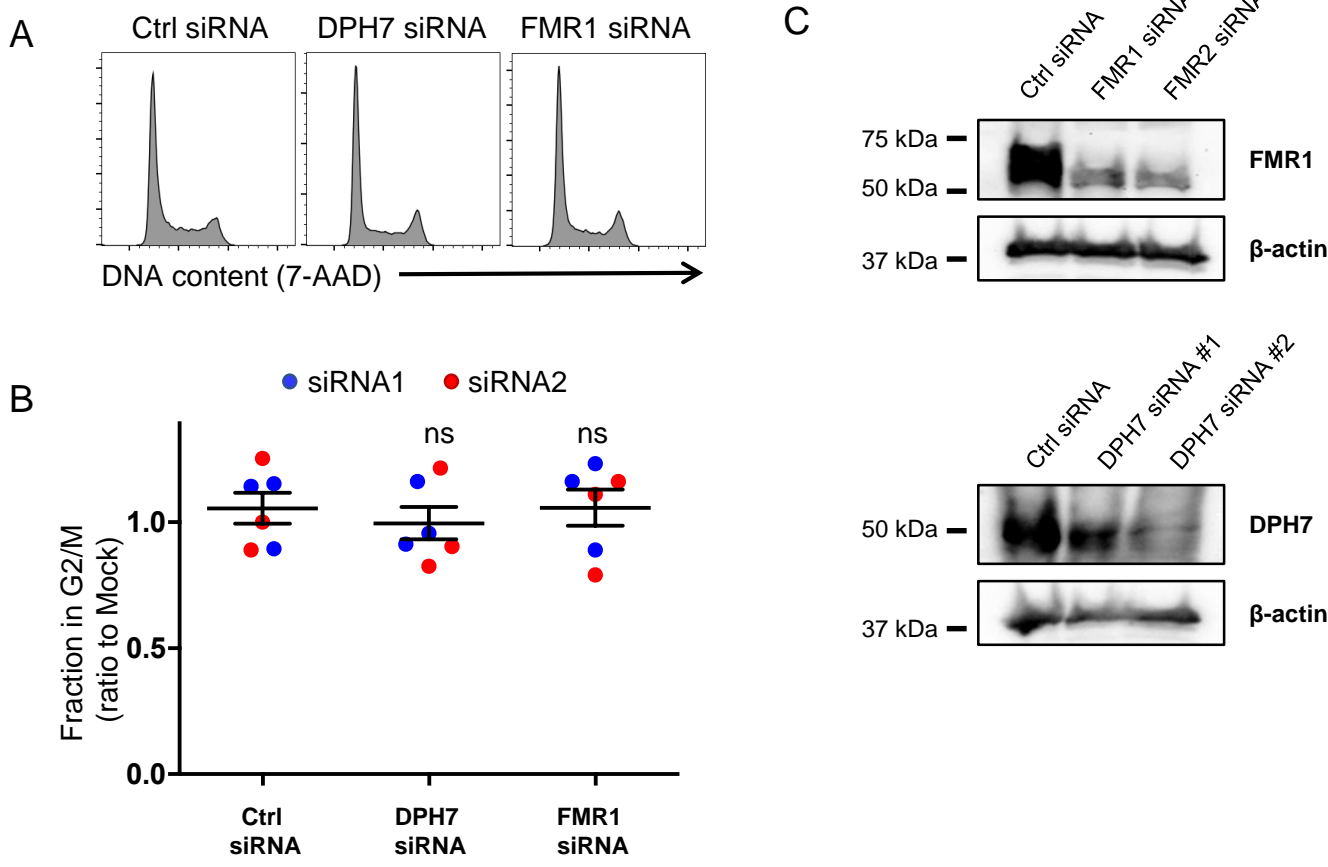

Supplement: supp [file elife_poa_e53036_Figure_4_figure_supplement_3.pdf › elife_poa_e53036_Figure_4_figure_supplement_3.pdf]

Figure 5—figure supplement 1

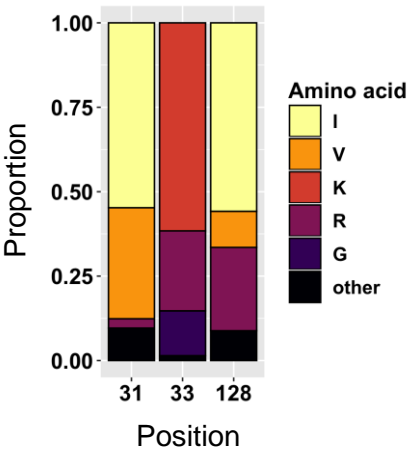

Supplement: supp [file elife_poa_e53036_Figure_5_figure_supplement_1.pdf › elife_poa_e53036_Figure_5_figure_supplement_1.pdf]

Figure 5—figure supplement 2

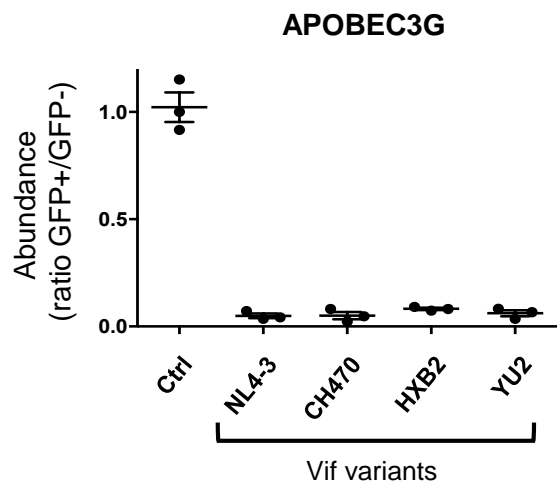

Supplement: supp [file elife_poa_e53036_Figure_5_figure_supplement_2.pdf › elife_poa_e53036_Figure_5_figure_supplement_2.pdf]

Figure 6–figure supplement 1

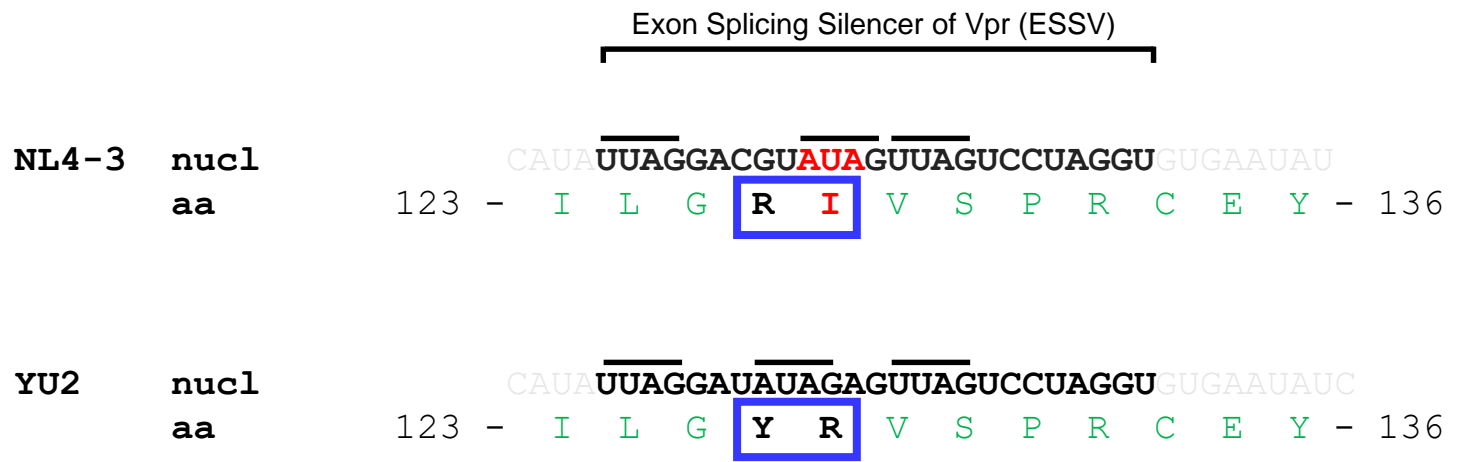

Supplement: supp [file elife_poa_e53036_Figure_6_figure_supplement_1.pdf › elife_poa_e53036_Figure_6_figure_supplement_1.pdf]

Figure 6–figure supplement 2

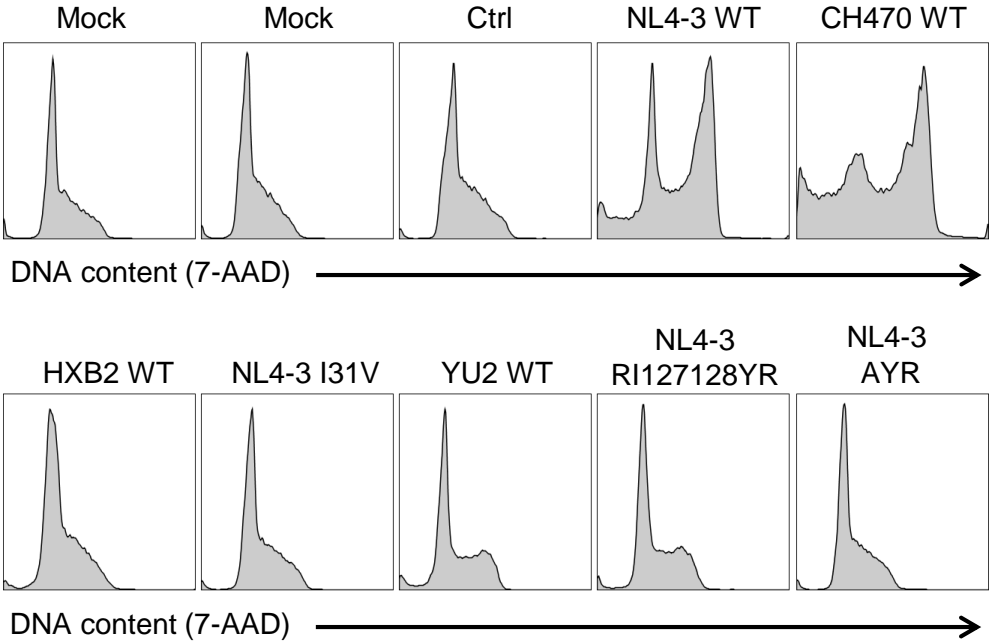

Supplement: supp [file elife_poa_e53036_Figure_6_figure_supplement_2.pdf › elife_poa_e53036_Figure_6_figure_supplement_2.pdf]

Figure 6–figure supplement 3

A

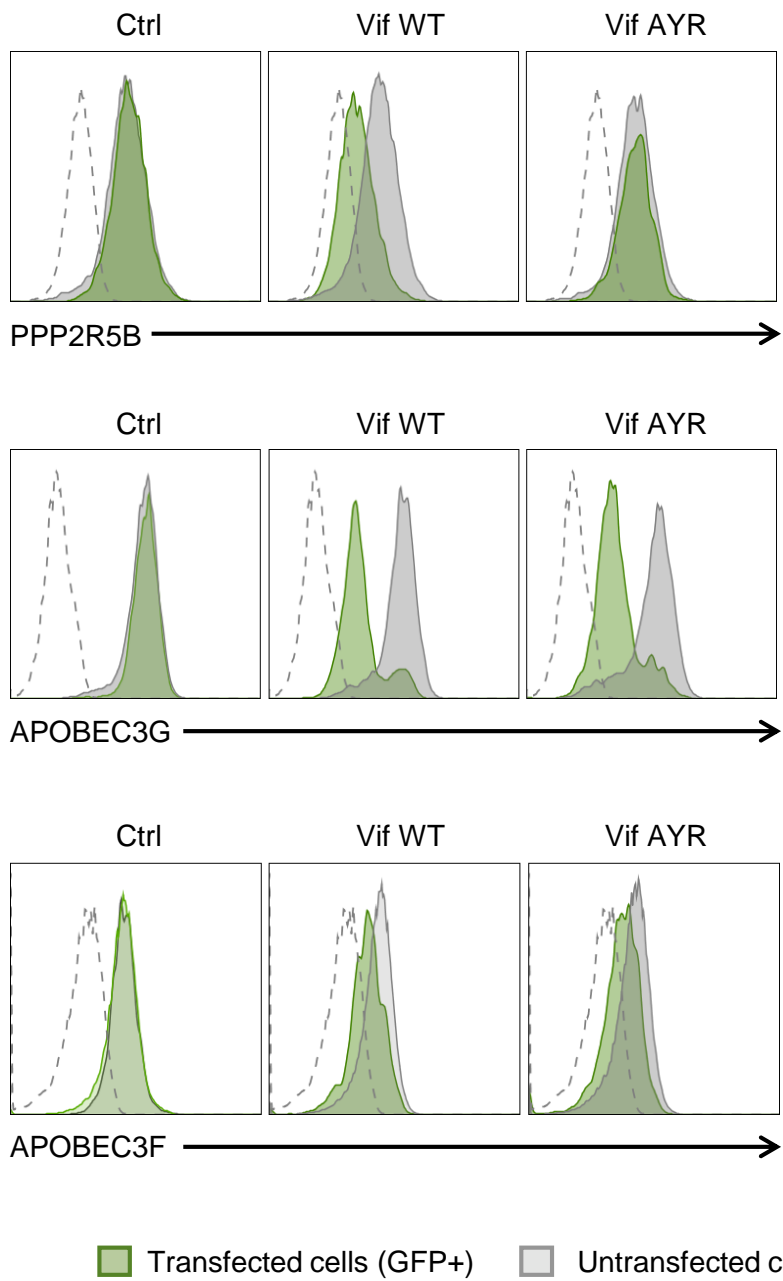

B

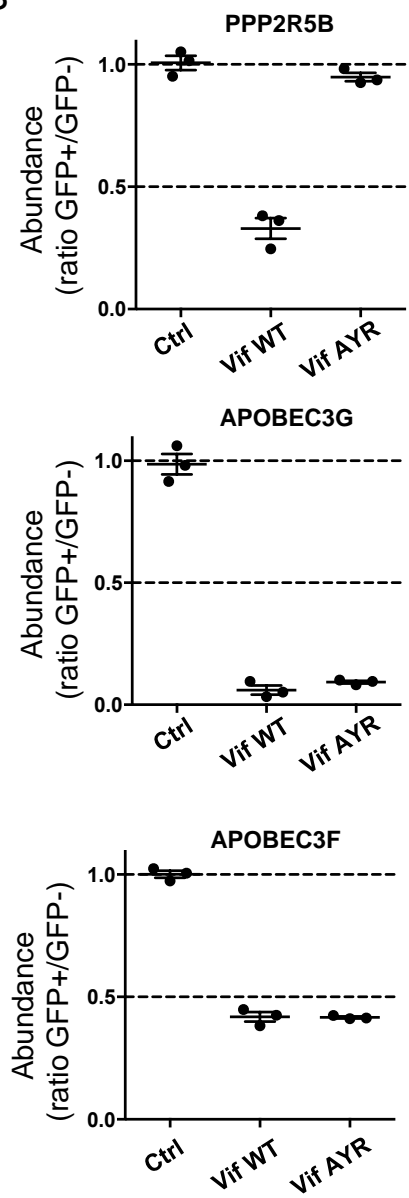

Supplement: supp [file elife_poa_e53036_Figure_6_figure_supplement_3.pdf › elife_poa_e53036_Figure_6_figure_supplement_3.pdf]

Figure 7–figure supplement 1

A

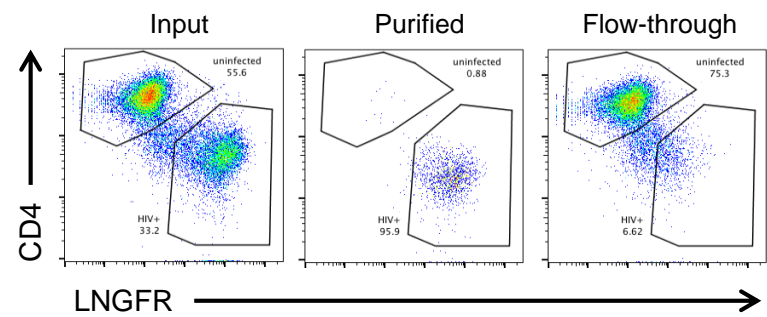

B

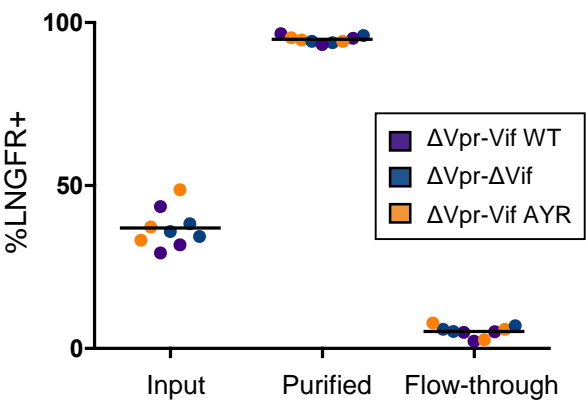

Supplement: supp [file elife_poa_e53036_Figure_7_figure_supplement_1.pdf › elife_poa_e53036_Figure_7_figure_supplement_1.pdf]

Figure 7–figure supplement 2

A

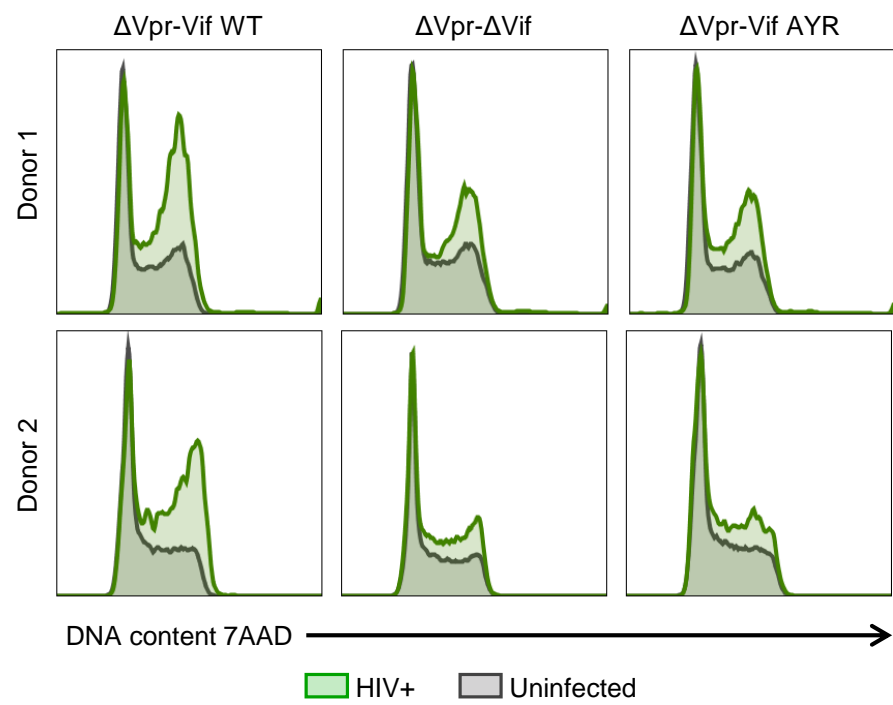

B

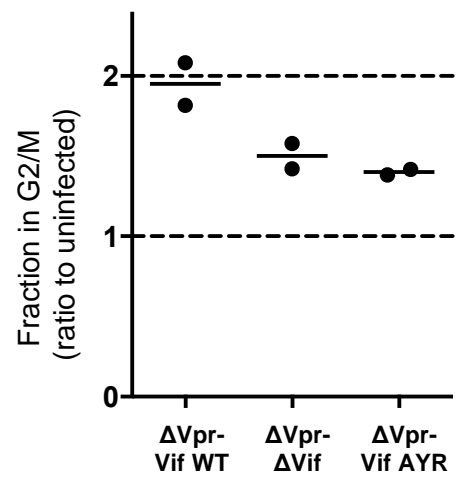

Supplement: supp [file elife_poa_e53036_Figure_7_figure_supplement_2.pdf › elife_poa_e53036_Figure_7_figure_supplement_2.pdf]

Figure 7–figure supplement 3

A

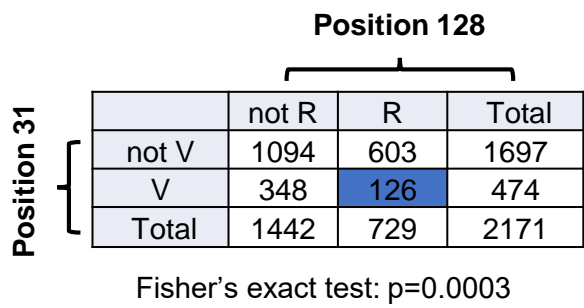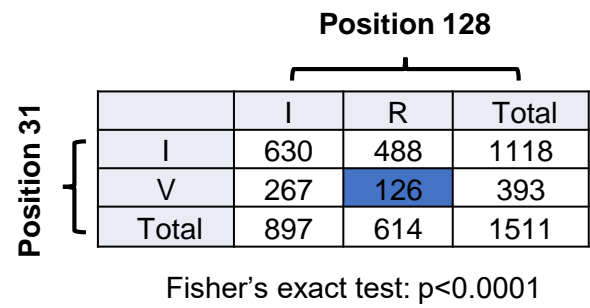

B

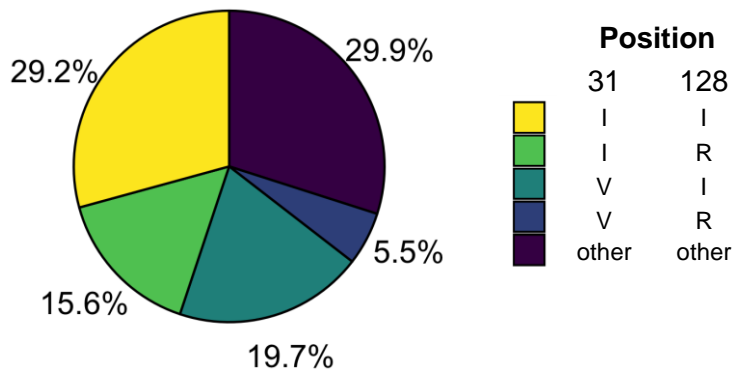

C

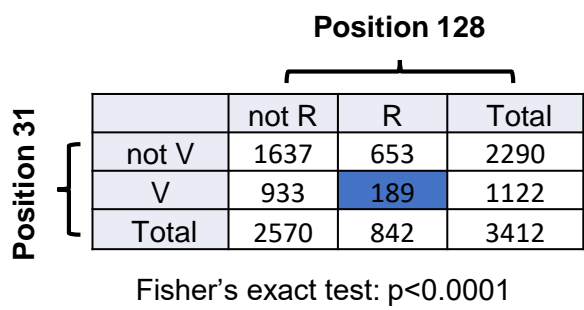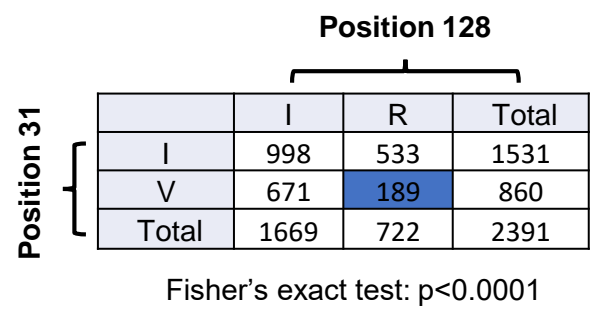

Supplement: supp [file elife_poa_e53036_Figure_7_figure_supplement_3.pdf › elife_poa_e53036_Figure_7_figure_supplement_3.pdf]

Figure 7–figure supplement 4

A

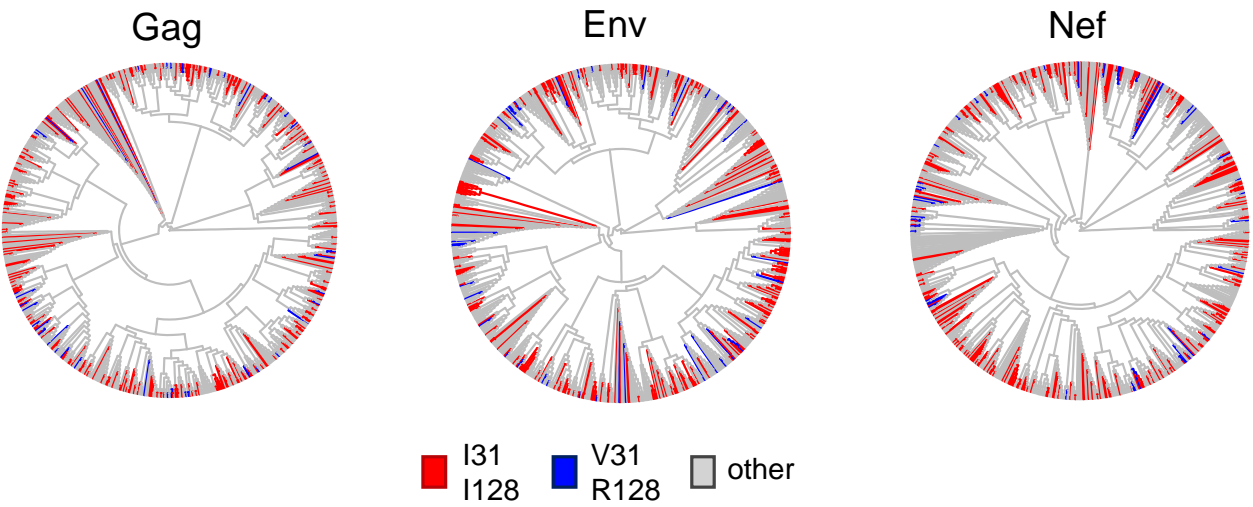

B

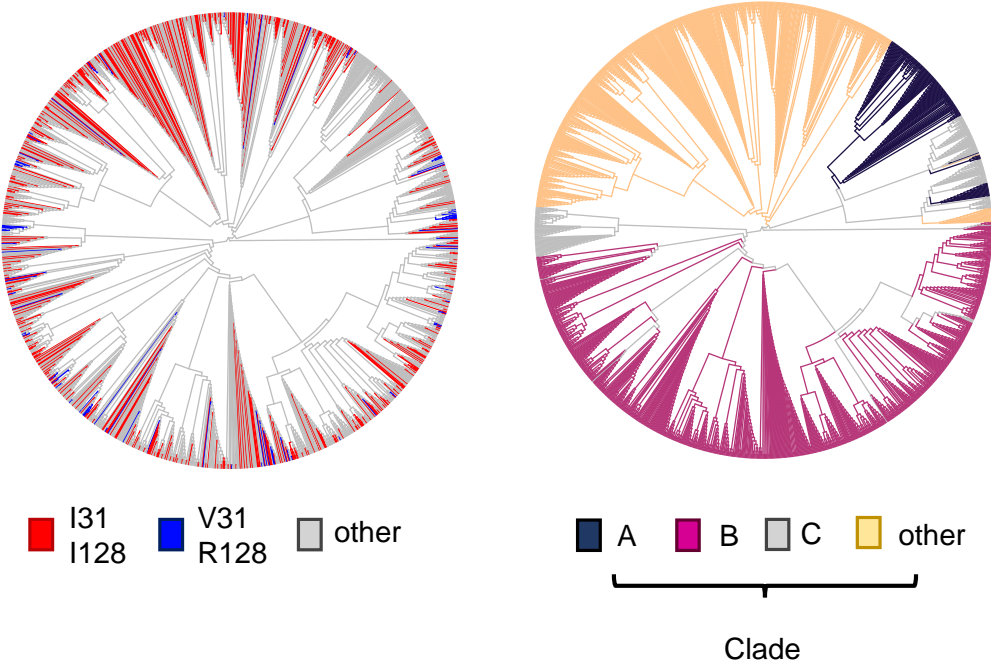

Supplement: supp [file elife_poa_e53036_Figure_7_figure_supplement_4.pdf › elife_poa_e53036_Figure_7_figure_supplement_4.pdf]
